# Supplementary material
Source: PubMed Central journal article supplement (PMC4114963)
Supplement: NIHMS609877-supplement-Supplemental_Table_S5.pdf [file NIHMS609877-supplement-Supplemental_Table_S5.pdf]

**Table S5.** MRM assay of individual proteins.

| Protein<br>(HUMAN) | Peptide              | MS/MS<br>spectrum | Precursor ion<br>(m/z) | Fragment ion<br>(m/z) | Retention time<br>(minutes) | Declustering<br>potential | Collision<br>energy | Area of<br>synthetic<br>peptide | Area in control<br>sample | Area in disease<br>sample | Interference |
|--------------------|----------------------|-------------------|------------------------|-----------------------|-----------------------------|---------------------------|---------------------|---------------------------------|---------------------------|---------------------------|--------------|
| 1433B              | AVTEQGHELSNEER       | Yes               | 533.59                 | 304.2                 | 7.00                        | 69.8                      | 33.8                | 36751                           | ND                        | ND                        | No           |
| 1433B              | AVTEQGHELSNEER       | Yes               | 533.59                 | 634.3                 | 7.00                        | 69.8                      | 24.8                | 10858                           | ND                        | ND                        | No           |
| 1433B              | AVTEQGHELSNEER       | Yes               | 533.59                 | 747.4                 | 7.00                        | 69.8                      | 33.8                | 26988                           | ND                        | ND                        | No           |
| 1433B              | AVTEQGHELSNEER       | Yes               | 533.59                 | 876.4                 | 7.00                        | 69.8                      | 33.8                | 21485                           | ND                        | ND                        | No           |
| 1433B              | DNLTWTSENQGDGDAGEGEN | No                |                        |                       |                             |                           |                     |                                 |                           |                           |              |
| 1433B              | SELVQK               | Yes               | 352.2                  | 275.2                 | 6.20                        | 46.4                      | 27                  | 207881                          | ND                        | ND                        | No           |
| 1433B              | SELVQK               | Yes               | 352.2                  | 374.2                 | 6.20                        | 46.4                      | 18                  | 213663                          | ND                        | ND                        | No           |
| 1433B              | SELVQK               | Yes               | 352.2                  | 487.3                 | 6.20                        | 46.4                      | 18                  | 623035                          | ND                        | ND                        | No           |
| 1433B              | SELVQK               | Yes               | 352.2                  | 616.4                 | 6.20                        | 46.4                      | 18                  | 56523                           | ND                        | ND                        | No           |
| 1433B              | TAFDEAIAELDTLNEESYK  | Yes               | 1080.01                | 635.3                 | 23.79                       | 140.3                     | 50                  | 4007                            | ND                        | ND                        | No           |
| 1433B              | TAFDEAIAELDTLNEESYK  | Yes               | 1080.01                | 748.4                 | 23.79                       | 140.3                     | 47                  | 3371                            | ND                        | ND                        | No           |
| 1433B              | TAFDEAIAELDTLNEESYK  | Yes               | 1080.01                | 769.3                 | 23.79                       | 140.3                     | 53                  | 2542                            | ND                        | ND                        | No           |
| 1433B              | TAFDEAIAELDTLNEESYK  | Yes               | 1080.01                | 983.5                 | 23.79                       | 140.3                     | 50                  | 2438                            | ND                        | ND                        | No           |
| 1433B              | YLIPNATQPESK         | Yes               | 680.86                 | 277.2                 | 11.89                       | 88.8                      | 32.5                | 1333499                         | ND                        | ND                        | No           |
| 1433B              | YLIPNATQPESK         | Yes               | 680.86                 | 460.2                 | 11.89                       | 88.8                      | 41.5                | 374275                          | ND                        | ND                        | No           |
| 1433B              | YLIPNATQPESK         | Yes               | 680.86                 | 760.4                 | 11.89                       | 88.8                      | 41.5                | 55070                           | ND                        | ND                        | No           |
| 1433B              | YLIPNATQPESK         | Yes               | 680.86                 | 971.5                 | 11.89                       | 88.8                      | 32.5                | 349158                          | ND                        | ND                        | No           |
| 1433E              | AAFDDAIAELDTLSEESYK  | Yes               | 1044.49                | 591.2                 | 23.94                       | 135.7                     | 48.5                | 8029                            | ND                        | ND                        | No           |
| 1433E              | AAFDDAIAELDTLSEESYK  | Yes               | 1044.49                | 704.3                 | 23.94                       | 135.7                     | 45.5                | 6261                            | ND                        | ND                        | No           |
| 1433E              | AAFDDAIAELDTLSEESYK  | Yes               | 1044.49                | 742.3                 | 23.94                       | 135.7                     | 51.5                | 5181                            | ND                        | ND                        | No           |
| 1433E              | AAFDDAIAELDTLSEESYK  | Yes               | 1044.49                | 956.5                 | 23.94                       | 135.7                     | 57.5                | 2357                            | ND                        | ND                        | No           |
| 1433E              | EDLVYQAK             | Yes               | 483.25                 | 346.2                 | 9.39                        | 63.3                      | 20.8                | 240157                          | ND                        | ND                        | No           |

**Table S5.** MRM assay of individual proteins.

| Protein<br>(_HUMAN) | Peptide                    | MS/MS<br>spectrum | Precursor ion<br>(m/z) | Fragment ion<br>(m/z) | Retention time<br>(minutes) | Declustering<br>potential | Collision<br>energy | Area of<br>synthetic<br>peptide | Area in control<br>sample | Area in disease<br>sample | Interference |
|---------------------|----------------------------|-------------------|------------------------|-----------------------|-----------------------------|---------------------------|---------------------|---------------------------------|---------------------------|---------------------------|--------------|
| 1433E               | EDLVYQAK                   | Yes               | 483.25                 | 509.3                 | 9.39                        | 63.3                      | 20.8                | 1127184                         | ND                        | ND                        | No           |
| 1433E               | EDLVYQAK                   | Yes               | 483.25                 | 608.3                 | 9.39                        | 63.3                      | 23.8                | 296662                          | ND                        | ND                        | No           |
| 1433E               | EDLVYQAK                   | Yes               | 483.25                 | 721.4                 | 9.39                        | 63.3                      | 23.8                | 96975                           | ND                        | ND                        | No           |
| 1433E               | HLIPAANTGESK               | Yes               | 619.33                 | 251.2                 | 7.96                        | 80.9                      | 32.8                | 482492                          | ND                        | ND                        | No           |
| 1433E               | HLIPAANTGESK               | Yes               | 619.33                 | 364.2                 | 7.96                        | 80.9                      | 29.8                | 277086                          | ND                        | ND                        | No           |
| 1433E               | HLIPAANTGESK               | Yes               | 619.33                 | 874.4                 | 7.96                        | 80.9                      | 32.8                | 230233                          | ND                        | ND                        | No           |
| 1433E               | HLIPAANTGESK               | Yes               | 619.33                 | 987.5                 | 7.96                        | 80.9                      | 29.8                | 72031                           | ND                        | ND                        | No           |
| 1433E               | IISSIEQK                   | Yes               | 459.27                 | 275.2                 | 8.67                        | 60.2                      | 28.7                | 126673                          | ND                        | ND                        | No           |
| 1433E               | IISSIEQK                   | Yes               | 459.27                 | 604.3                 | 8.67                        | 60.2                      | 22.7                | 52515                           | ND                        | ND                        | No           |
| 1433E               | IISSIEQK                   | Yes               | 459.27                 | 691.4                 | 8.67                        | 60.2                      | 22.7                | 730425                          | ND                        | ND                        | No           |
| 1433E               | IISSIEQK                   | Yes               | 459.27                 | 804.4                 | 8.67                        | 60.2                      | 22.7                | 80137                           | ND                        | ND                        | No           |
| 1433E               | VFYYK                      | Yes               | 360.19                 | 310.2                 | 10.29                       | 47.5                      | 24.3                | 464492                          | ND                        | ND                        | No           |
| 1433E               | VFYYK                      | Yes               | 360.19                 | 473.2                 | 10.29                       | 47.5                      | 18.3                | 384997                          | ND                        | ND                        | No           |
| 1433E               | VFYYK                      | Yes               | 360.19                 | 573.3                 | 10.29                       | 47.5                      | 15.3                | ND                              | ND                        | ND                        | No           |
| 1433E               | VFYYK                      | Yes               | 360.19                 | 620.3                 | 10.29                       | 47.5                      | 18.3                | 253615                          | ND                        | ND                        | No           |
| 1433S               | DNLTLWTADNAGEEGGEAPQEPQS   | No                |                        |                       |                             |                           |                     |                                 |                           |                           |              |
| 1433S               | EAGDAESR                   | Yes               | 417.68                 | 262.2                 | 5.24                        | 54.9                      | 20.9                | 59960                           | ND                        | ND                        | No           |
| 1433S               | EAGDAESR                   | Yes               | 417.68                 | 391.2                 | 5.24                        | 54.9                      | 17.9                | 36302                           | ND                        | ND                        | No           |
| 1433S               | EAGDAESR                   | Yes               | 417.68                 | 462.2                 | 5.24                        | 54.9                      | 17.9                | 29753                           | ND                        | ND                        | No           |
| 1433S               | EAGDAESR                   | Yes               | 417.68                 | 634.3                 | 5.24                        | 54.9                      | 17.9                | 16749                           | ND                        | ND                        | No           |
| 1433S               | LGLALNFSVFHYEIANSPPEAISLAK | No                |                        |                       |                             |                           |                     |                                 |                           |                           |              |
| 1433S               | SNEEGSEK                   | Yes               | 504.71                 | 331.1                 | 5.23                        | 66.1                      | 21.7                | 16881                           | ND                        | ND                        | No           |
| 1433S               | SNEEGSEK                   | Yes               | 504.71                 | 549.3                 | 5.23                        | 66.1                      | 24.7                | 65459                           | ND                        | ND                        | No           |

**Table S5.** MRM assay of individual proteins.

| Protein<br>(_HUMAN) | Peptide             | MS/MS<br>spectrum | Precursor ion<br>(m/z) | Fragment ion<br>(m/z) | Retention time<br>(minutes) | Declustering<br>potential | Collision<br>energy | Area of<br>synthetic<br>peptide | Area in control<br>sample | Area in disease<br>sample | Interference                           |
|---------------------|---------------------|-------------------|------------------------|-----------------------|-----------------------------|---------------------------|---------------------|---------------------------------|---------------------------|---------------------------|----------------------------------------|
| 1433S               | SNEEGSEEK           | Yes               | 504.71                 | 678.3                 | 5.23                        | 66.1                      | 21.7                | 19026                           | ND                        | ND                        | No                                     |
| 1433S               | SNEEGSEEK           | Yes               | 504.71                 | 807.3                 | 5.23                        | 66.1                      | 24.7                | 50028                           | ND                        | ND                        | No                                     |
| 1433S               | VLSSIEQK            | Yes               | 452.26                 | 517.3                 | 8.22                        | 59.3                      | 31.4                | 42014                           | ND                        | 31850                     | Yes (Based on<br>Transition<br>Ratios) |
| 1433S               | VLSSIEQK            | Yes               | 452.26                 | 604.3                 | 8.22                        | 59.3                      | 22.4                | 76585                           | ND                        | 7892                      | No                                     |
| 1433S               | VLSSIEQK            | Yes               | 452.26                 | 691.4                 | 8.22                        | 59.3                      | 22.4                | 702927                          | ND                        | 155285                    | Yes (Based on<br>Transition<br>Ratios) |
| 1433S               | VLSSIEQK            | Yes               | 452.26                 | 804.4                 | 8.22                        | 59.3                      | 22.4                | 99702                           | ND                        | 6614                      | No                                     |
| 1433T               | AVTEQGAELSNEER      | Yes               | 766.9                  | 1004.5                | 8.05                        | 100                       | 42.2                | ND                              | ND                        | ND                        | No                                     |
| 1433T               | AVTEQGAELSNEER      | Yes               | 766.9                  | 634.3                 | 8.05                        | 100                       | 42.2                | ND                              | ND                        | ND                        | No                                     |
| 1433T               | AVTEQGAELSNEER      | Yes               | 766.9                  | 747.4                 | 8.05                        | 100                       | 39.2                | ND                              | ND                        | ND                        | No                                     |
| 1433T               | AVTEQGAELSNEER      | Yes               | 766.9                  | 876.4                 | 8.05                        | 100                       | 39.2                | ND                              | ND                        | ND                        | No                                     |
| 1433T               | EMQPTHPIR           | Yes               | 554.8                  | 360.7                 | 9.80                        | 100                       | 29.9                | ND                              | ND                        | ND                        | No                                     |
| 1433T               | EMQPTHPIR           | Yes               | 554.8                  | 385.3                 | 9.80                        | 100                       | 29.9                | ND                              | ND                        | ND                        | No                                     |
| 1433T               | EMQPTHPIR           | Yes               | 554.8                  | 522.3                 | 9.80                        | 100                       | 29.9                | ND                              | ND                        | ND                        | No                                     |
| 1433T               | EMQPTHPIR           | Yes               | 554.8                  | 720.4                 | 9.80                        | 100                       | 29.9                | ND                              | ND                        | ND                        | No                                     |
| 1433T               | QTIDNSQGAYQEAFDISK  | Yes               | 1008                   | 1100.5                | 17.80                       | 100                       | 49.9                | ND                              | ND                        | ND                        | No                                     |
| 1433T               | QTIDNSQGAYQEAFDISK  | Yes               | 1008                   | 1228.6                | 17.80                       | 100                       | 49.9                | ND                              | ND                        | ND                        | No                                     |
| 1433T               | QTIDNSQGAYQEAFDISK  | Yes               | 1008                   | 609.3                 | 17.80                       | 100                       | 49.9                | ND                              | ND                        | ND                        | No                                     |
| 1433T               | QTIDNSQGAYQEAFDISK  | Yes               | 1008                   | 680.4                 | 17.80                       | 100                       | 49.9                | ND                              | ND                        | ND                        | No                                     |
| 1433T               | TAFDEAIAELDTLNEDSYK | Yes               | 1073                   | 1197.6                | 22.62                       | 100                       | 52.7                | ND                              | 7768                      | 10484                     | No                                     |
| 1433T               | TAFDEAIAELDTLNEDSYK | Yes               | 1073                   | 748.352               | 22.62                       | 100                       | 46.7                | ND                              | 36045                     | 22217                     | No                                     |

**Table S5.** MRM assay of individual proteins.

| Protein<br>(_HUMAN) | Peptide             | MS/MS<br>spectrum | Precursor ion<br>(m/z) | Fragment ion<br>(m/z) | Retention time<br>(minutes) | Declustering<br>potential | Collision<br>energy | Area of<br>synthetic<br>peptide | Area in control<br>sample | Area in disease<br>sample | Interference |
|---------------------|---------------------|-------------------|------------------------|-----------------------|-----------------------------|---------------------------|---------------------|---------------------------------|---------------------------|---------------------------|--------------|
| 1433T               | TAFDEAIAELDTLNEDSYK | Yes               | 1073                   | 755.3                 | 22.62                       | 100                       | 52.7                | ND                              | 33278                     | 24614                     | No           |
| 1433T               | TAFDEAIAELDTLNEDSYK | Yes               | 1073                   | 969.453               | 22.62                       | 100                       | 58.7                | ND                              | 37538                     | 20363                     | No           |
| 1433T               | TAFDEAIAELDTLNEDSYK | Yes               | 715.7                  | 1084.5                | 22.62                       | 100                       | 37                  | ND                              | ND                        | ND                        | No           |
| 1433T               | TAFDEAIAELDTLNEDSYK | Yes               | 715.7                  | 512.2                 | 22.62                       | 100                       | 37                  | ND                              | ND                        | ND                        | No           |
| 1433T               | TAFDEAIAELDTLNEDSYK | Yes               | 715.7                  | 748.4                 | 22.62                       | 100                       | 37                  | ND                              | ND                        | ND                        | No           |
| 1433T               | TAFDEAIAELDTLNEDSYK | Yes               | 715.7                  | 755.3                 | 22.62                       | 100                       | 37                  | ND                              | ND                        | ND                        | No           |
| 1433T               | YLIANATNPESK        | Yes               | 660.8                  | 1044.5                | 13.60                       | 100                       | 34.6                | ND                              | ND                        | ND                        | No           |
| 1433T               | YLIANATNPESK        | Yes               | 660.8                  | 675.3                 | 13.60                       | 100                       | 34.6                | ND                              | ND                        | ND                        | No           |
| 1433T               | YLIANATNPESK        | Yes               | 660.8                  | 860.4                 | 13.60                       | 100                       | 34.6                | ND                              | ND                        | ND                        | No           |
| 1433T               | YLIANATNPESK        | Yes               | 660.8                  | 931.4                 | 13.60                       | 100                       | 34.6                | ND                              | ND                        | ND                        | No           |
| 1433Z               | FLIPNASQAESK        | Yes               | 652.846                | 261.16                | 12.66                       | 100                       | 31.2                | ND                              | 33044                     | 26867                     | No           |
| 1433Z               | FLIPNASQAESK        | Yes               | 652.846                | 466.2                 | 12.66                       | 100                       | 34.2                | ND                              | 10712                     | 25110                     | No           |
| 1433Z               | FLIPNASQAESK        | Yes               | 652.846                | 522.8                 | 12.66                       | 100                       | 34.2                | ND                              | 2700                      | ND                        | No           |
| 1433Z               | FLIPNASQAESK        | Yes               | 652.846                | 931.448               | 12.66                       | 100                       | 28.2                | ND                              | 20492                     | 18337                     | No           |
| 1433Z               | GIVDQSQQAYQEAFEISK  | Yes               | 1021                   | 1114.5                | 20.50                       | 100                       | 50.4                | ND                              | ND                        | ND                        | No           |
| 1433Z               | GIVDQSQQAYQEAFEISK  | Yes               | 1021                   | 1185.6                | 20.50                       | 100                       | 50.4                | ND                              | ND                        | ND                        | No           |
| 1433Z               | GIVDQSQQAYQEAFEISK  | Yes               | 1021                   | 694.4                 | 20.50                       | 100                       | 50.4                | ND                              | ND                        | ND                        | No           |
| 1433Z               | GIVDQSQQAYQEAFEISK  | Yes               | 1021                   | 951.5                 | 20.50                       | 100                       | 50.4                | ND                              | ND                        | ND                        | No           |
| 1433Z               | SVTEQGAELSNEER      | Yes               | 774.86                 | 1004.46               | 8.32                        | 100                       | 39.6                | ND                              | ND                        | ND                        | No           |
| 1433Z               | SVTEQGAELSNEER      | Yes               | 774.86                 | 634.28                | 8.32                        | 100                       | 42.6                | ND                              | ND                        | ND                        | No           |
| 1433Z               | SVTEQGAELSNEER      | Yes               | 774.86                 | 747.4                 | 8.32                        | 100                       | 39.6                | ND                              | ND                        | ND                        | No           |
| 1433Z               | SVTEQGAELSNEER      | Yes               | 774.86                 | 876.4                 | 8.32                        | 100                       | 39.6                | ND                              | ND                        | ND                        | No           |
| 1433Z               | TAFDEAIAELDTLSEESYK | Yes               | 1066.5                 | 1184.6                | 27.20                       | 100                       | 52.4                | ND                              | ND                        | ND                        | No           |

**Table S5.** MRM assay of individual proteins.

| Protein<br>(_HUMAN) | Peptide             | MS/MS<br>spectrum | Precursor ion<br>(m/z) | Fragment ion<br>(m/z) | Retention time<br>(minutes) | Declustering<br>potential | Collision<br>energy | Area of<br>synthetic<br>peptide | Area in control<br>sample | Area in disease<br>sample | Interference |
|---------------------|---------------------|-------------------|------------------------|-----------------------|-----------------------------|---------------------------|---------------------|---------------------------------|---------------------------|---------------------------|--------------|
| 1433Z               | TAFDEAIAELDTLSEESYK | Yes               | 1066.5                 | 655.3                 | 27.20                       | 100                       | 52.4                | ND                              | ND                        | ND                        | No           |
| 1433Z               | TAFDEAIAELDTLSEESYK | Yes               | 1066.5                 | 742.3                 | 27.20                       | 100                       | 52.4                | ND                              | ND                        | ND                        | No           |
| 1433Z               | TAFDEAIAELDTLSEESYK | Yes               | 1066.5                 | 956.5                 | 27.20                       | 100                       | 52.4                | ND                              | ND                        | ND                        | No           |
| 1433Z               | TAFDEAIAELDTLSEESYK | Yes               | 711.3                  | 639.3                 | 27.20                       | 100                       | 36.8                | ND                              | ND                        | ND                        | No           |
| 1433Z               | TAFDEAIAELDTLSEESYK | Yes               | 711.3                  | 655.3                 | 27.20                       | 100                       | 36.8                | ND                              | ND                        | ND                        | No           |
| 1433Z               | TAFDEAIAELDTLSEESYK | Yes               | 711.3                  | 742.3                 | 27.20                       | 100                       | 36.8                | ND                              | ND                        | ND                        | No           |
| 1433Z               | TAFDEAIAELDTLSEESYK | Yes               | 711.3                  | 748.4                 | 27.20                       | 100                       | 36.8                | ND                              | ND                        | ND                        | No           |
| 6PGD                | AGQAVDDFIEK         | Yes               | 596.796                | 523.7                 | 11.96                       | 100                       | 31.8                | ND                              | ND                        | 5510                      | No           |
| 6PGD                | AGQAVDDFIEK         | Yes               | 596.796                | 766.4                 | 11.96                       | 100                       | 31.8                | ND                              | ND                        | 3759                      | No           |
| 6PGD                | AGQAVDDFIEK         | Yes               | 596.796                | 865.431               | 11.96                       | 100                       | 28.8                | ND                              | 2995                      | 7668                      | No           |
| 6PGD                | AGQAVDDFIEK         | Yes               | 596.796                | 936.468               | 11.96                       | 100                       | 28.8                | ND                              | 49595                     | 42889                     | No           |
| 6PGD                | HEMLPASLIQAQR       | Yes               | 747.4                  | 267.1                 | 16.30                       | 100                       | 38.4                | ND                              | ND                        | ND                        | No           |
| 6PGD                | HEMLPASLIQAQR       | Yes               | 747.4                  | 398.2                 | 16.30                       | 100                       | 38.4                | ND                              | ND                        | ND                        | No           |
| 6PGD                | HEMLPASLIQAQR       | Yes               | 747.4                  | 511.2                 | 16.30                       | 100                       | 38.4                | ND                              | ND                        | ND                        | No           |
| 6PGD                | HEMLPASLIQAQR       | Yes               | 747.4                  | 983.6                 | 16.30                       | 100                       | 38.4                | ND                              | ND                        | ND                        | No           |
| 6PGD                | LVPLLDTGDIIDGGNSEYR | Yes               | 1080.56                | 1010.5                | 21.47                       | 100                       | 53                  | ND                              | 11212                     | 5787                      | No           |
| 6PGD                | LVPLLDTGDIIDGGNSEYR | Yes               | 1080.56                | 1123.5                | 21.47                       | 100                       | 53                  | ND                              | 8014                      | 8773                      | No           |
| 6PGD                | LVPLLDTGDIIDGGNSEYR | Yes               | 1080.56                | 897.37                | 21.47                       | 100                       | 53                  | ND                              | 8601                      | 18343                     | No           |
| 6PGD                | LVPLLDTGDIIDGGNSEYR | Yes               | 1080.56                | 974.487               | 21.47                       | 100                       | 47                  | ND                              | 18249                     | 11827                     | No           |
| 6PGD                | YGPSLMPGGNK         | Yes               | 560.8                  | 450.7                 | 14.10                       | 100                       | 30.2                | ND                              | ND                        | ND                        | No           |
| 6PGD                | YGPSLMPGGNK         | Yes               | 560.8                  | 472.3                 | 14.10                       | 100                       | 30.2                | ND                              | ND                        | ND                        | No           |
| 6PGD                | YGPSLMPGGNK         | Yes               | 560.8                  | 603.3                 | 14.10                       | 100                       | 30.2                | ND                              | ND                        | ND                        | No           |
| 6PGD                | YGPSLMPGGNK         | Yes               | 560.8                  | 803.4                 | 14.10                       | 100                       | 30.2                | ND                              | ND                        | ND                        | No           |

**Table S5.** MRM assay of individual proteins.

| Protein<br>(_HUMAN) | Peptide           | MS/MS<br>spectrum | Precursor ion<br>(m/z) | Fragment ion<br>(m/z) | Retention time<br>(minutes) | Declustering<br>potential | Collision<br>energy | Area of<br>synthetic<br>peptide | Area in control<br>sample | Area in disease<br>sample | Interference                           |
|---------------------|-------------------|-------------------|------------------------|-----------------------|-----------------------------|---------------------------|---------------------|---------------------------------|---------------------------|---------------------------|----------------------------------------|
| A1AG1               | NWGLSVYADKPETTK   | Yes               | 570.29                 | 358.2                 | 14.80                       | 74.6                      | 26.6                | 15161                           | ND                        | ND                        | No                                     |
| A1AG1               | NWGLSVYADKPETTK   | Yes               | 570.29                 | 703.4                 | 14.80                       | 74.6                      | 35.6                | 19782                           | ND                        | ND                        | No                                     |
| A1AG1               | NWGLSVYADKPETTK   | Yes               | 570.29                 | 818.4                 | 14.80                       | 74.6                      | 32.6                | 9017                            | ND                        | ND                        | No                                     |
| A1AG1               | NWGLSVYADKPETTK   | Yes               | 570.29                 | 889.5                 | 14.80                       | 74.6                      | 32.6                | 13307                           | ND                        | ND                        | No                                     |
| A1AG1               | SVQEIQATFFYFTPDK  | No                |                        |                       |                             |                           |                     |                                 |                           |                           |                                        |
| A1AG1               | TEDTIFLR          | Yes               | 497.76                 | 435.3                 | 14.64                       | 65.2                      | 27.4                | 20543                           | ND                        | ND                        | No                                     |
| A1AG1               | TEDTIFLR          | Yes               | 497.76                 | 548.4                 | 14.64                       | 65.2                      | 27.4                | 9853                            | ND                        | ND                        | No                                     |
| A1AG1               | TEDTIFLR          | Yes               | 497.76                 | 649.4                 | 14.64                       | 65.2                      | 30.4                | 15459                           | ND                        | ND                        | No                                     |
| A1AG1               | TEDTIFLR          | Yes               | 497.76                 | 764.4                 | 14.64                       | 65.2                      | 27.4                | 38060                           | ND                        | ND                        | No                                     |
| A1AG1               | WFYIASAFR         | Yes               | 580.8                  | 480.3                 | 22.23                       | 75.9                      | 28.1                | ND                              | 7773                      | 9038                      | Yes (Based on<br>Manual<br>Review)     |
| A1AG1               | WFYIASAFR         | Yes               | 580.8                  | 551.3                 | 22.23                       | 75.9                      | 31.1                | 28779                           | 22248                     | 37207                     | No                                     |
| A1AG1               | WFYIASAFR         | Yes               | 580.8                  | 664.4                 | 22.23                       | 75.9                      | 28.1                | ND                              | 12644                     | 18958                     | Yes (Based on<br>Manual<br>Review)     |
| A1AG1               | WFYIASAFR         | Yes               | 580.8                  | 827.4                 | 22.23                       | 75.9                      | 28.1                | 51249                           | 30185                     | 55344                     | No                                     |
| A1AG1               | YVGGQEHAHLLILR    | Yes               | 584.99                 | 263.1                 | 17.44                       | 76.5                      | 27.4                | 28795                           | 36369                     | 45277                     | No                                     |
| A1AG1               | YVGGQEHAHLLILR    | Yes               | 584.99                 | 627.5                 | 17.44                       | 76.5                      | 36.4                | 4721                            | 12909                     | 6516                      | No                                     |
| A1AG1               | YVGGQEHAHLLILR    | Yes               | 584.99                 | 764.5                 | 17.44                       | 76.5                      | 30.4                | 3629                            | 8179                      | 6390                      | No                                     |
| A1AG1               | YVGGQEHAHLLILR    | Yes               | 584.99                 | 835.6                 | 17.44                       | 76.5                      | 33.4                | 11539                           | 10178                     | 19375                     | No                                     |
| ABCD1               | DAGIALLSITHRPSLWK | Yes               | 626.69                 | 357.2                 | 20.27                       | 81.8                      | 26.5                | 16644                           | 15695                     | 26872                     | No                                     |
| ABCD1               | DAGIALLSITHRPSLWK | Yes               | 626.69                 | 428.2                 | 20.27                       | 81.8                      | 32.5                | 7326                            | 64375                     | 68949                     | Yes (Based on<br>Transition<br>Ratios) |

**Table S5.** MRM assay of individual proteins.

| Protein<br>(_HUMAN) | Peptide              | MS/MS<br>spectrum | Precursor ion<br>(m/z) | Fragment ion<br>(m/z) | Retention time<br>(minutes) | Declustering<br>potential | Collision<br>energy | Area of<br>synthetic<br>peptide | Area in control<br>sample | Area in disease<br>sample | Interference                       |
|---------------------|----------------------|-------------------|------------------------|-----------------------|-----------------------------|---------------------------|---------------------|---------------------------------|---------------------------|---------------------------|------------------------------------|
| ABCD1               | DAGIALLSITHRPSLWK    | Yes               | 626.69                 | 741.4                 | 20.27                       | 81.8                      | 32.5                | 1781                            | ND                        | 5987                      | No                                 |
| ABCD1               | DAGIALLSITHRPSLWK    | Yes               | 626.69                 | 786.5                 | 20.27                       | 81.8                      | 35.5                | 3234                            | 5027                      | 13975                     | No                                 |
| ABCD1               | ELEDAQAGSGTIGR       | No                |                        |                       |                             |                           |                     |                                 |                           |                           |                                    |
| ABCD1               | GLQAPAGEPTQEASGVAAAK | Yes               | 618.32                 | 370.2                 | 10.56                       | 80.8                      | 26.1                | 48001                           | ND                        | ND                        | No                                 |
| ABCD1               | GLQAPAGEPTQEASGVAAAK | Yes               | 618.32                 | 516.3                 | 10.56                       | 80.8                      | 26.1                | 12249                           | ND                        | ND                        | No                                 |
| ABCD1               | GLQAPAGEPTQEASGVAAAK | Yes               | 618.32                 | 674.4                 | 10.56                       | 80.8                      | 38.1                | 11839                           | ND                        | ND                        | No                                 |
| ABCD1               | GLQAPAGEPTQEASGVAAAK | Yes               | 618.32                 | 803.4                 | 10.56                       | 80.8                      | 29.1                | 15535                           | ND                        | ND                        | No                                 |
| ABCD1               | NLLTAAADAIER         | Yes               | 629.34                 | 341.2                 | 21.66                       | 82.2                      | 30.2                | 203667                          | ND                        | ND                        | No                                 |
| ABCD1               | NLLTAAADAIER         | Yes               | 629.34                 | 745.4                 | 21.66                       | 82.2                      | 30.2                | 109727                          | ND                        | ND                        | No                                 |
| ABCD1               | NLLTAAADAIER         | Yes               | 629.34                 | 816.4                 | 21.66                       | 82.2                      | 30.2                | 139616                          | ND                        | ND                        | No                                 |
| ABCD1               | NLLTAAADAIER         | Yes               | 629.34                 | 917.5                 | 21.66                       | 82.2                      | 30.2                | ND                              | ND                        | ND                        | Yes (Based on<br>Manual<br>Review) |
| ABCD1               | YHTHLLQFDGEGGWK      | Yes               | 596.62                 | 447.2                 | 15.82                       | 78                        | 28                  | 26800                           | ND                        | ND                        | No                                 |
| ABCD1               | YHTHLLQFDGEGGWK      | Yes               | 596.62                 | 633.3                 | 15.82                       | 78                        | 37                  | 21885                           | ND                        | ND                        | No                                 |
| ABCD1               | YHTHLLQFDGEGGWK      | Yes               | 596.62                 | 748.3                 | 15.82                       | 78                        | 28                  | 17926                           | ND                        | ND                        | No                                 |
| ABCD1               | YHTHLLQFDGEGGWK      | Yes               | 596.62                 | 895.4                 | 15.82                       | 78                        | 28                  | 12723                           | ND                        | ND                        | No                                 |
| ADA12               | ADEVVSASVSGDLWIPVK   | Yes               | 965                    | 316.1                 | 19.65                       | 125.5                     | 51                  | 7041                            | ND                        | ND                        | No                                 |
| ADA12               | ADEVVSASVSGDLWIPVK   | Yes               | 965                    | 343.2                 | 19.65                       | 125.5                     | 42                  | 18438                           | ND                        | ND                        | No                                 |
| ADA12               | ADEVVSASVSGDLWIPVK   | Yes               | 965                    | 415.2                 | 19.65                       | 125.5                     | 51                  | 4998                            | ND                        | ND                        | No                                 |
| ADA12               | ADEVVSASVSGDLWIPVK   | Yes               | 965                    | 456.3                 | 19.65                       | 125.5                     | 45                  | 3289                            | ND                        | ND                        | No                                 |
| ADA12               | FGFGGSTDSGPIR        | Yes               | 649.31                 | 466.2                 | 14.39                       | 84.8                      | 28.1                | 12510                           | ND                        | ND                        | No                                 |
| ADA12               | FGFGGSTDSGPIR        | Yes               | 649.31                 | 745.4                 | 14.39                       | 84.8                      | 31.1                | 51191                           | ND                        | ND                        | No                                 |
| ADA12               | FGFGGSTDSGPIR        | Yes               | 649.31                 | 832.4                 | 14.39                       | 84.8                      | 31.1                | 38987                           | ND                        | ND                        | No                                 |

**Table S5.** MRM assay of individual proteins.

| Protein<br>(_HUMAN) | Peptide                  | MS/MS<br>spectrum | Precursor ion<br>(m/z) | Fragment ion<br>(m/z) | Retention time<br>(minutes) | Declustering<br>potential | Collision<br>energy | Area of<br>synthetic<br>peptide | Area in control<br>sample | Area in disease<br>sample | Interference |
|---------------------|--------------------------|-------------------|------------------------|-----------------------|-----------------------------|---------------------------|---------------------|---------------------------------|---------------------------|---------------------------|--------------|
| ADA12               | FGFGGSTDSGPIR            | Yes               | 649.31                 | 946.5                 | 14.39                       | 84.8                      | 34.1                | 144144                          | ND                        | ND                        | No           |
| ADA12               | LIEIANHVDK               | Yes               | 384.55                 | 612.3                 | 10.67                       | 50.6                      | 20.2                | 14646                           | ND                        | ND                        | No           |
| ADA12               | LIEIANHVDK               | Yes               | 384.55                 | 683.3                 | 10.67                       | 50.6                      | 20.2                | 46832                           | ND                        | ND                        | No           |
| ADA12               | LIEIANHVDK               | Yes               | 384.55                 | 796.4                 | 10.67                       | 50.6                      | 26.2                | 2603                            | ND                        | ND                        | No           |
| ADA12               | LIEIANHVDK               | Yes               | 384.55                 | 925.5                 | 10.67                       | 50.6                      | 26.2                | ND                              | ND                        | ND                        | No           |
| ADA12               | NHPEVLNIR                | Yes               | 546.3                  | 252.1                 | 10.96                       | 71.5                      | 29.5                | 325509                          | ND                        | ND                        | No           |
| ADA12               | NHPEVLNIR                | Yes               | 546.3                  | 614.4                 | 10.96                       | 71.5                      | 32.5                | 12196                           | ND                        | ND                        | No           |
| ADA12               | NHPEVLNIR                | Yes               | 546.3                  | 743.4                 | 10.96                       | 71.5                      | 35.5                | 9577                            | ND                        | ND                        | No           |
| ADA12               | NHPEVLNIR                | Yes               | 546.3                  | 840.5                 | 10.96                       | 71.5                      | 26.5                | 95971                           | ND                        | ND                        | No           |
| ADA12               | YVELVIVADNR              | No                |                        |                       |                             |                           |                     |                                 |                           |                           |              |
| ADML                | LAHQIQFTDK               | Yes               | 455.24                 | 363.2                 | 12.05                       | 59.7                      | 20.8                | 197650                          | 1284                      | 7339                      | No           |
| ADML                | LAHQIQFTDK               | Yes               | 455.24                 | 510.3                 | 12.05                       | 59.7                      | 20.8                | 356558                          | 6009                      | 3578                      | No           |
| ADML                | LAHQIQFTDK               | Yes               | 455.24                 | 563.3                 | 12.05                       | 59.7                      | 20.8                | 174853                          | 10798                     | 5819                      | No           |
| ADML                | LAHQIQFTDK               | Yes               | 455.24                 | 638.3                 | 12.05                       | 59.7                      | 20.8                | 139796                          | ND                        | ND                        | No           |
| ADML                | SPEDSSPDAAR              | Yes               | 566.25                 | 529.3                 | 5.66                        | 74                        | 33.4                | 58888                           | ND                        | ND                        | No           |
| ADML                | SPEDSSPDAAR              | Yes               | 566.25                 | 703.3                 | 5.66                        | 74                        | 33.4                | 46261                           | ND                        | ND                        | No           |
| ADML                | SPEDSSPDAAR              | Yes               | 566.25                 | 818.4                 | 5.66                        | 74                        | 27.4                | 41098                           | ND                        | ND                        | No           |
| ADML                | SPEDSSPDAAR              | Yes               | 566.25                 | 947.4                 | 5.66                        | 74                        | 27.4                | 21671                           | ND                        | ND                        | No           |
| ADML                | TLVSSKPQAHGAPAPPSGSAPHFL | No                |                        |                       |                             |                           |                     |                                 |                           |                           |              |
| AGR2                | GWGDQLIWTQTYEEALYK       | No                |                        |                       |                             |                           |                     |                                 |                           |                           |              |
| AGR2                | HLSPDGQYVPR              | No                |                        |                       |                             |                           |                     |                                 |                           |                           |              |
| AGR2                | IPVSFLLLVALSITLAR        | No                |                        |                       |                             |                           |                     |                                 |                           |                           |              |
| AGR2                | LAEQFVLLNLVYETTDK        | No                |                        |                       |                             |                           |                     |                                 |                           |                           |              |



**Table S5.** MRM assay of individual proteins.

| Protein<br>(_HUMAN) | Peptide        | MS/MS<br>spectrum | Precursor ion<br>(m/z) | Fragment ion<br>(m/z) | Retention time<br>(minutes) | Decustering<br>potential | Collision<br>energy | Area of<br>synthetic<br>peptide | Area in control<br>sample | Area in disease<br>sample | Interference                       |
|---------------------|----------------|-------------------|------------------------|-----------------------|-----------------------------|--------------------------|---------------------|---------------------------------|---------------------------|---------------------------|------------------------------------|
| AGR2                | LPQTLSR        | No                |                        |                       |                             |                          |                     |                                 |                           |                           |                                    |
| AIFM1               | ALGTEVIQLFPEK  | Yes               | 482.27                 | 373.2                 | 20.63                       | 63.2                     | 31.1                | 54144                           | ND                        | ND                        | No                                 |
| AIFM1               | ALGTEVIQLFPEK  | Yes               | 482.27                 | 520.3                 | 20.63                       | 63.2                     | 19.1                | 15070                           | ND                        | ND                        | No                                 |
| AIFM1               | ALGTEVIQLFPEK  | Yes               | 482.27                 | 633.4                 | 20.63                       | 63.2                     | 19.1                | 13609                           | ND                        | ND                        | No                                 |
| AIFM1               | ALGTEVIQLFPEK  | Yes               | 482.27                 | 761.4                 | 20.63                       | 63.2                     | 22.1                | 15443                           | ND                        | ND                        | No                                 |
| AIFM1               | ELWFSDDPNVTK   | Yes               | 725.85                 | 429.2                 | 17.45                       | 94.6                     | 31.4                | 140135                          | ND                        | ND                        | No                                 |
| AIFM1               | ELWFSDDPNVTK   | Yes               | 725.85                 | 558.3                 | 17.45                       | 94.6                     | 43.4                | 348298                          | ND                        | ND                        | No                                 |
| AIFM1               | ELWFSDDPNVTK   | Yes               | 725.85                 | 788.4                 | 17.45                       | 94.6                     | 34.4                | 73278                           | ND                        | ND                        | No                                 |
| AIFM1               | ELWFSDDPNVTK   | Yes               | 725.85                 | 875.4                 | 17.45                       | 94.6                     | 34.4                | 232333                          | ND                        | ND                        | No                                 |
| AIFM1               | GVIFYLR        | Yes               | 434.26                 | 270.2                 | 17.80                       | 57                       | 21.6                | ND                              | ND                        | ND                        | Yes (Based on<br>Manual<br>Review) |
| AIFM1               | GVIFYLR        | Yes               | 434.26                 | 288.2                 | 17.80                       | 57                       | 21.6                | ND                              | ND                        | ND                        | Yes (Based on<br>Manual<br>Review) |
| AIFM1               | GVIFYLR        | Yes               | 434.26                 | 598.3                 | 17.80                       | 57                       | 21.6                | 13864                           | 6635                      | 5858                      | No                                 |
| AIFM1               | GVIFYLR        | Yes               | 434.26                 | 711.4                 | 17.80                       | 57                       | 18.6                | 8973                            | 2165                      | 670                       | No                                 |
| AIFM1               | LNDGSQITYEK    | Yes               | 634.31                 | 540.3                 | 8.81                        | 82.8                     | 39.4                | 60447                           | ND                        | ND                        | No                                 |
| AIFM1               | LNDGSQITYEK    | Yes               | 634.31                 | 781.4                 | 8.81                        | 82.8                     | 30.4                | 11909                           | ND                        | ND                        | No                                 |
| AIFM1               | LNDGSQITYEK    | Yes               | 634.31                 | 868.4                 | 8.81                        | 82.8                     | 33.4                | 9914                            | ND                        | ND                        | No                                 |
| AIFM1               | LNDGSQITYEK    | Yes               | 634.31                 | 925.5                 | 8.81                        | 82.8                     | 30.4                | 16224                           | ND                        | ND                        | No                                 |
| AIFM1               | TGGLEIDSDFGGFR | Yes               | 735.85                 | 458.2                 | 18.55                       | 95.9                     | 34.9                | 193086                          | ND                        | ND                        | No                                 |
| AIFM1               | TGGLEIDSDFGGFR | Yes               | 735.85                 | 583.3                 | 18.55                       | 95.9                     | 43.9                | 216289                          | ND                        | ND                        | No                                 |
| AIFM1               | TGGLEIDSDFGGFR | Yes               | 735.85                 | 785.4                 | 18.55                       | 95.9                     | 43.9                | 212035                          | ND                        | ND                        | No                                 |

**Table S5.** MRM assay of individual proteins.

| Protein<br>(_HUMAN) | Peptide                 | MS/MS<br>spectrum | Precursor ion<br>(m/z) | Fragment ion<br>(m/z) | Retention time<br>(minutes) | Declustering<br>potential | Collision<br>energy | Area of<br>synthetic<br>peptide | Area in control<br>sample | Area in disease<br>sample | Interference |
|---------------------|-------------------------|-------------------|------------------------|-----------------------|-----------------------------|---------------------------|---------------------|---------------------------------|---------------------------|---------------------------|--------------|
| AIFM1               | TGGLEIDSDFGGFR          | Yes               | 735.85                 | 900.4                 | 18.55                       | 95.9                      | 34.9                | 250017                          | ND                        | ND                        | No           |
| ALDOA               | ADDGRPFQVIK             | Yes               | 671.86                 | 260.2                 | 12.73                       | 87.7                      | 38.1                | 57232                           | ND                        | 16752                     | No           |
| ALDOA               | ADDGRPFQVIK             | Yes               | 671.86                 | 515.2                 | 12.73                       | 87.7                      | 41.1                | 9951                            | ND                        | ND                        | No           |
| ALDOA               | ADDGRPFQVIK             | Yes               | 671.86                 | 584.4                 | 12.73                       | 87.7                      | 41.1                | 6634                            | ND                        | ND                        | No           |
| ALDOA               | ADDGRPFQVIK             | Yes               | 671.86                 | 828.5                 | 12.73                       | 87.7                      | 32.1                | 3715                            | ND                        | ND                        | No           |
| ALDOA               | ALQASALK                | Yes               | 401.25                 | 260.2                 | 9.06                        | 52.8                      | 26.2                | 93337                           | ND                        | ND                        | No           |
| ALDOA               | ALQASALK                | Yes               | 401.25                 | 331.2                 | 9.06                        | 52.8                      | 23.2                | 24128                           | 2698                      | ND                        | No           |
| ALDOA               | ALQASALK                | Yes               | 401.25                 | 489.3                 | 9.06                        | 52.8                      | 23.2                | 223049                          | 16124                     | 13040                     | No           |
| ALDOA               | ALQASALK                | Yes               | 401.25                 | 617.4                 | 9.06                        | 52.8                      | 20.2                | 489365                          | 32743                     | 38710                     | No           |
| ALDOA               | GVVPLAGTNGETTTQGLDGLSER | No                |                        |                       |                             |                           |                     |                                 |                           |                           |              |
| ALDOA               | QLLLTADDR               | Yes               | 522.79                 | 355.2                 | 12.69                       | 68.4                      | 25.5                | 25305                           | ND                        | ND                        | No           |
| ALDOA               | QLLLTADDR               | Yes               | 522.79                 | 577.3                 | 12.69                       | 68.4                      | 25.5                | 57025                           | ND                        | ND                        | No           |
| ALDOA               | QLLLTADDR               | Yes               | 522.79                 | 690.3                 | 12.69                       | 68.4                      | 28.5                | 38632                           | ND                        | ND                        | No           |
| ALDOA               | QLLLTADDR               | Yes               | 522.79                 | 803.4                 | 12.69                       | 68.4                      | 25.5                | 34399                           | ND                        | ND                        | No           |
| ALDOA               | YTPSGQAGAAASESLFVSNHAY  | No                |                        |                       |                             |                           |                     |                                 |                           |                           |              |
| AMPN                | ALEQALEK                | Yes               | 451.25                 | 276.2                 | 9.58                        | 59.2                      | 31.4                | 216811                          | 29554                     | 24375                     | No           |
| AMPN                | ALEQALEK                | Yes               | 451.25                 | 389.2                 | 9.58                        | 59.2                      | 31.4                | 188579                          | 31830                     | 24080                     | No           |
| AMPN                | ALEQALEK                | Yes               | 451.25                 | 588.3                 | 9.58                        | 59.2                      | 22.4                | 228929                          | 35778                     | 16331                     | No           |
| AMPN                | ALEQALEK                | Yes               | 451.25                 | 717.4                 | 9.58                        | 59.2                      | 22.4                | 821359                          | 105037                    | 77801                     | No           |
| AMPN                | DHSAIPVINR              | Yes               | 374.54                 | 402.2                 | 10.85                       | 49.3                      | 19.7                | 116667                          | 52211                     | 38900                     | No           |
| AMPN                | DHSAIPVINR              | Yes               | 374.54                 | 411.2                 | 10.85                       | 49.3                      | 19.7                | 84518                           | 26157                     | 38584                     | No           |
| AMPN                | DHSAIPVINR              | Yes               | 374.54                 | 524.2                 | 10.85                       | 49.3                      | 16.7                | 92943                           | 34489                     | 29780                     | No           |
| AMPN                | DHSAIPVINR              | Yes               | 374.54                 | 598.4                 | 10.85                       | 49.3                      | 25.7                | 20494                           | ND                        | ND                        | No           |

**Table S5.** MRM assay of individual proteins.

| Protein<br>(_HUMAN) | Peptide         | MS/MS<br>spectrum | Precursor ion<br>(m/z) | Fragment ion<br>(m/z) | Retention time<br>(minutes) | Declustering<br>potential | Collision<br>energy | Area of<br>synthetic<br>peptide | Area in control<br>sample | Area in disease<br>sample | Interference |
|---------------------|-----------------|-------------------|------------------------|-----------------------|-----------------------------|---------------------------|---------------------|---------------------------------|---------------------------|---------------------------|--------------|
| AMPN                | ENSLLDPLSSSSSNK | Yes               | 862.92                 | 444.2                 | 19.12                       | 112.3                     | 37.5                | 10118                           | ND                        | ND                        | No           |
| AMPN                | ENSLLDPLSSSSSNK | Yes               | 862.92                 | 557.3                 | 19.12                       | 112.3                     | 37.5                | 11610                           | ND                        | ND                        | No           |
| AMPN                | ENSLLDPLSSSSSNK | Yes               | 862.92                 | 696.3                 | 19.12                       | 112.3                     | 46.5                | 6571                            | ND                        | ND                        | No           |
| AMPN                | ENSLLDPLSSSSSNK | Yes               | 862.92                 | 906.5                 | 19.12                       | 112.3                     | 43.5                | 30009                           | ND                        | ND                        | No           |
| AMPN                | EVVLQWFTENSK    | Yes               | 740.38                 | 348.2                 | 21.23                       | 96.5                      | 44.1                | 9876                            | ND                        | ND                        | No           |
| AMPN                | EVVLQWFTENSK    | Yes               | 740.38                 | 477.2                 | 21.23                       | 96.5                      | 44.1                | 5279                            | ND                        | ND                        | No           |
| AMPN                | EVVLQWFTENSK    | Yes               | 740.38                 | 578.3                 | 21.23                       | 96.5                      | 35.1                | 13317                           | ND                        | ND                        | No           |
| AMPN                | EVVLQWFTENSK    | Yes               | 740.38                 | 911.4                 | 21.23                       | 96.5                      | 35.1                | 20856                           | ND                        | 1256                      | No           |
| AMPN                | SIQLPTTVR       | Yes               | 507.8                  | 329.2                 | 13.27                       | 66.5                      | 24.8                | 100846                          | 9370                      | 10546                     | No           |
| AMPN                | SIQLPTTVR       | Yes               | 507.8                  | 573.3                 | 13.27                       | 66.5                      | 24.8                | 92108                           | 9816                      | 18205                     | No           |
| AMPN                | SIQLPTTVR       | Yes               | 507.8                  | 686.4                 | 13.27                       | 66.5                      | 24.8                | 29619                           | ND                        | ND                        | No           |
| AMPN                | SIQLPTTVR       | Yes               | 507.8                  | 814.5                 | 13.27                       | 66.5                      | 24.8                | 36008                           | ND                        | ND                        | No           |
| ANGP1               | DAPHVEPDFSSQK   | Yes               | 486.23                 | 449.2                 | 10.06                       | 63.7                      | 22.3                | 129411                          | ND                        | ND                        | No           |
| ANGP1               | DAPHVEPDFSSQK   | Yes               | 486.23                 | 596.3                 | 10.06                       | 63.7                      | 22.3                | 121085                          | ND                        | ND                        | No           |
| ANGP1               | DAPHVEPDFSSQK   | Yes               | 486.23                 | 649.3                 | 10.06                       | 63.7                      | 19.3                | 113401                          | ND                        | ND                        | No           |
| ANGP1               | DAPHVEPDFSSQK   | Yes               | 486.23                 | 808.4                 | 10.06                       | 63.7                      | 22.3                | 41632                           | ND                        | ND                        | No           |
| ANGP1               | LEIQLENSLSTYK   | Yes               | 825.95                 | 498.3                 | 21.58                       | 107.5                     | 35.8                | 7726                            | ND                        | ND                        | No           |
| ANGP1               | LEIQLENSLSTYK   | Yes               | 825.95                 | 597.4                 | 21.58                       | 107.5                     | 38.8                | 11377                           | ND                        | ND                        | No           |
| ANGP1               | LEIQLENSLSTYK   | Yes               | 825.95                 | 710.4                 | 21.58                       | 107.5                     | 35.8                | 4332                            | ND                        | ND                        | No           |
| ANGP1               | LEIQLENSLSTYK   | Yes               | 825.95                 | 941.5                 | 21.58                       | 107.5                     | 38.8                | 10238                           | ND                        | ND                        | No           |
| ANGP1               | QLLQQTNEILK     | Yes               | 664.38                 | 355.2                 | 14.79                       | 86.7                      | 31.7                | 13582                           | ND                        | ND                        | No           |
| ANGP1               | QLLQQTNEILK     | Yes               | 664.38                 | 616.4                 | 14.79                       | 86.7                      | 28.7                | 5997                            | ND                        | ND                        | No           |
| ANGP1               | QLLQQTNEILK     | Yes               | 664.38                 | 717.4                 | 14.79                       | 86.7                      | 31.7                | 8698                            | ND                        | ND                        | No           |

**Table S5.** MRM assay of individual proteins.

| Protein<br>(_HUMAN) | Peptide        | MS/MS<br>spectrum | Precursor ion<br>(m/z) | Fragment ion<br>(m/z) | Retention time<br>(minutes) | Declustering<br>potential | Collision<br>energy | Area of<br>synthetic<br>peptide | Area in control<br>sample | Area in disease<br>sample | Interference |
|---------------------|----------------|-------------------|------------------------|-----------------------|-----------------------------|---------------------------|---------------------|---------------------------------|---------------------------|---------------------------|--------------|
| ANGP1               | QLLQQTNEILK    | Yes               | 664.38                 | 973.5                 | 14.79                       | 86.7                      | 34.7                | 5615                            | ND                        | ND                        | No           |
| ANGP1               | QSSLILHGADFSTK | Yes               | 501.93                 | 335.2                 | 13.86                       | 65.7                      | 29.1                | 17867                           | ND                        | ND                        | No           |
| ANGP1               | QSSLILHGADFSTK | Yes               | 501.93                 | 597.3                 | 13.86                       | 65.7                      | 32.1                | 7854                            | ND                        | ND                        | No           |
| ANGP1               | QSSLILHGADFSTK | Yes               | 501.93                 | 725.3                 | 13.86                       | 65.7                      | 26.1                | 23893                           | ND                        | ND                        | No           |
| ANGP1               | QSSLILHGADFSTK | Yes               | 501.93                 | 862.4                 | 13.86                       | 65.7                      | 32.1                | 10466                           | ND                        | ND                        | No           |
| ANGP1               | QTYIIQELEK     | Yes               | 632.84                 | 506.3                 | 16.78                       | 82.6                      | 30.3                | 9552                            | ND                        | ND                        | No           |
| ANGP1               | QTYIIQELEK     | Yes               | 632.84                 | 518.3                 | 16.78                       | 82.6                      | 39.3                | 37203                           | ND                        | ND                        | No           |
| ANGP1               | QTYIIQELEK     | Yes               | 632.84                 | 759.4                 | 16.78                       | 82.6                      | 33.3                | 102064                          | ND                        | ND                        | No           |
| ANGP1               | QTYIIQELEK     | Yes               | 632.84                 | 872.5                 | 16.78                       | 82.6                      | 30.3                | 26215                           | ND                        | ND                        | No           |
| ANGP2               | DAPLEYDDSVQR   | Yes               | 704.32                 | 284.1                 | 10.77                       | 91.9                      | 36.5                | 57077                           | ND                        | ND                        | No           |
| ANGP2               | DAPLEYDDSVQR   | Yes               | 704.32                 | 303.2                 | 10.77                       | 91.9                      | 30.5                | 9948                            | ND                        | ND                        | No           |
| ANGP2               | DAPLEYDDSVQR   | Yes               | 704.32                 | 604.3                 | 10.77                       | 91.9                      | 42.5                | 22642                           | ND                        | ND                        | No           |
| ANGP2               | DAPLEYDDSVQR   | Yes               | 704.32                 | 882.4                 | 10.77                       | 91.9                      | 33.5                | 26897                           | ND                        | ND                        | No           |
| ANGP2               | DQLQVLVSK      | Yes               | 515.3                  | 446.3                 | 13.23                       | 67.5                      | 34.2                | 12065                           | ND                        | ND                        | No           |
| ANGP2               | DQLQVLVSK      | Yes               | 515.3                  | 545.4                 | 13.23                       | 67.5                      | 25.2                | 17644                           | ND                        | ND                        | No           |
| ANGP2               | DQLQVLVSK      | Yes               | 515.3                  | 673.4                 | 13.23                       | 67.5                      | 25.2                | 18383                           | ND                        | ND                        | No           |
| ANGP2               | DQLQVLVSK      | Yes               | 515.3                  | 786.5                 | 13.23                       | 67.5                      | 25.2                | 24421                           | ND                        | ND                        | No           |
| ANGP2               | ISSISQPGNDFSTK | Yes               | 740.87                 | 335.2                 | 11.05                       | 96.6                      | 41.1                | 69610                           | 1535                      | ND                        | No           |
| ANGP2               | ISSISQPGNDFSTK | Yes               | 740.87                 | 616.3                 | 11.05                       | 96.6                      | 32.1                | 133125                          | 1528                      | ND                        | No           |
| ANGP2               | ISSISQPGNDFSTK | Yes               | 740.87                 | 865.4                 | 11.05                       | 96.6                      | 35.1                | 470480                          | 3046                      | ND                        | No           |
| ANGP2               | ISSISQPGNDFSTK | Yes               | 740.87                 | 993.5                 | 11.05                       | 96.6                      | 35.1                | 24718                           | ND                        | ND                        | No           |
| ANGP2               | QILDQTSEINK    | Yes               | 644.84                 | 261.2                 | 10.45                       | 84.2                      | 36.9                | 88150                           | ND                        | ND                        | No           |
| ANGP2               | QILDQTSEINK    | Yes               | 644.84                 | 691.4                 | 10.45                       | 84.2                      | 30.9                | 27326                           | ND                        | ND                        | No           |

**Table S5.** MRM assay of individual proteins.

| Protein<br>(_HUMAN) | Peptide      | MS/MS<br>spectrum | Precursor ion<br>(m/z) | Fragment ion<br>(m/z) | Retention time<br>(minutes) | Declustering<br>potential | Collision<br>energy | Area of<br>synthetic<br>peptide | Area in control<br>sample | Area in disease<br>sample | Interference                           |
|---------------------|--------------|-------------------|------------------------|-----------------------|-----------------------------|---------------------------|---------------------|---------------------------------|---------------------------|---------------------------|----------------------------------------|
| ANGP2               | QILDQTSEINK  | Yes               | 644.84                 | 819.4                 | 10.45                       | 84.2                      | 30.9                | 13209                           | ND                        | ND                        | No                                     |
| ANGP2               | QILDQTSEINK  | Yes               | 644.84                 | 934.4                 | 10.45                       | 84.2                      | 30.9                | 13511                           | ND                        | ND                        | No                                     |
| ANGP2               | SSSSPYVSNVQR | Yes               | 691.34                 | 303.2                 | 8.67                        | 90.2                      | 35.9                | 14376                           | ND                        | ND                        | No                                     |
| ANGP2               | SSSSPYVSNVQR | Yes               | 691.34                 | 402.2                 | 8.67                        | 90.2                      | 38.9                | 8626                            | ND                        | ND                        | No                                     |
| ANGP2               | SSSSPYVSNVQR | Yes               | 691.34                 | 773.4                 | 8.67                        | 90.2                      | 38.9                | 28945                           | ND                        | ND                        | No                                     |
| ANGP2               | SSSSPYVSNVQR | Yes               | 691.34                 | 936.5                 | 8.67                        | 90.2                      | 38.9                | 10852                           | ND                        | ND                        | No                                     |
| APOA1               | AELQEGAR     | Yes               | 437.23                 | 303.2                 | 6.08                        | 57.4                      | 30.7                | 32779                           | ND                        | ND                        | No                                     |
| APOA1               | AELQEGAR     | Yes               | 437.23                 | 314.2                 | 6.08                        | 57.4                      | 21.7                | 18768                           | ND                        | ND                        | No                                     |
| APOA1               | AELQEGAR     | Yes               | 437.23                 | 560.3                 | 6.08                        | 57.4                      | 21.7                | 41545                           | ND                        | ND                        | No                                     |
| APOA1               | AELQEGAR     | Yes               | 437.23                 | 673.4                 | 6.08                        | 57.4                      | 21.7                | 42721                           | ND                        | ND                        | No                                     |
| APOA1               | AKPALEDLR    | Yes               | 506.79                 | 288.2                 | 10.23                       | 66.4                      | 33.8                | 67547                           | 413771                    | 304672                    | No                                     |
| APOA1               | AKPALEDLR    | Yes               | 506.79                 | 645.4                 | 10.23                       | 66.4                      | 33.8                | 6217                            | 50728                     | 54768                     | No                                     |
| APOA1               | AKPALEDLR    | Yes               | 506.79                 | 716.4                 | 10.23                       | 66.4                      | 33.8                | 6215                            | 44134                     | 45365                     | No                                     |
| APOA1               | AKPALEDLR    | Yes               | 506.79                 | 813.4                 | 10.23                       | 66.4                      | 24.8                | 27001                           | 229473                    | 181571                    | No                                     |
| APOA1               | ATEHLSTLSEK  | Yes               | 405.88                 | 363.2                 | 8.09                        | 53.4                      | 24.2                | 152014                          | 406460                    | 283988                    | No                                     |
| APOA1               | ATEHLSTLSEK  | Yes               | 405.88                 | 577.3                 | 8.09                        | 53.4                      | 21.2                | 43077                           | 121335                    | 100207                    | No                                     |
| APOA1               | ATEHLSTLSEK  | Yes               | 405.88                 | 664.4                 | 8.09                        | 53.4                      | 24.2                | 63143                           | 179229                    | 136387                    | No                                     |
| APOA1               | ATEHLSTLSEK  | Yes               | 405.88                 | 777.4                 | 8.09                        | 53.4                      | 18.2                | 24423                           | 78358                     | 64430                     | No                                     |
| APOA1               | LAEYHAK      | Yes               | 277.82                 | 355.2                 | 5.91                        | 36.8                      | 17.7                | 12865                           | 61357                     | 53448                     | Yes (Based on<br>Transition<br>Ratios) |
| APOA1               | LAEYHAK      | Yes               | 277.82                 | 518.3                 | 5.91                        | 36.8                      | 14.7                | 90636                           | 259261                    | 199228                    | Yes (Based on<br>Transition<br>Ratios) |

**Table S5.** MRM assay of individual proteins.

| Protein<br>(_HUMAN) | Peptide          | MS/MS<br>spectrum | Precursor ion<br>(m/z) | Fragment ion<br>(m/z) | Retention time<br>(minutes) | Declustering<br>potential | Collision<br>energy | Area of<br>synthetic<br>peptide | Area in control<br>sample | Area in disease<br>sample | Interference |
|---------------------|------------------|-------------------|------------------------|-----------------------|-----------------------------|---------------------------|---------------------|---------------------------------|---------------------------|---------------------------|--------------|
| APOA1               | LAEYHAK          | Yes               | 277.82                 | 647.3                 | 5.91                        | 36.8                      | 20.7                | ND                              | ND                        | ND                        | No           |
| APOA1               | LHELQEK          | Yes               | 448.75                 | 251.2                 | 6.34                        | 58.9                      | 25.2                | 605787                          | 205526                    | 130878                    | No           |
| APOA1               | LHELQEK          | Yes               | 448.75                 | 380.2                 | 6.34                        | 58.9                      | 31.2                | 206361                          | 46453                     | 34554                     | No           |
| APOA1               | LHELQEK          | Yes               | 448.75                 | 646.3                 | 6.34                        | 58.9                      | 22.2                | 240611                          | 48307                     | 57299                     | No           |
| APOA1               | LHELQEK          | Yes               | 448.75                 | 750.4                 | 6.34                        | 58.9                      | 22.2                | 23628                           | 7049                      | ND                        | No           |
| APOE                | AATVGS LAGQPLQER | Yes               | 749.4                  | 600.3                 | 13.82                       | 97.7                      | 32.5                | 193679                          | 433217                    | 288301                    | No           |
| APOE                | AATVGS LAGQPLQER | Yes               | 749.4                  | 642.4                 | 13.82                       | 97.7                      | 35.5                | 917391                          | 2100808                   | 1423198                   | No           |
| APOE                | AATVGS LAGQPLQER | Yes               | 749.4                  | 827.4                 | 13.82                       | 97.7                      | 44.5                | 658628                          | 1673309                   | 1041481                   | No           |
| APOE                | AATVGS LAGQPLQER | Yes               | 749.4                  | 898.5                 | 13.82                       | 97.7                      | 38.5                | 588960                          | 1516934                   | 947242                    | No           |
| APOE                | ALMDETMK         | Yes               | 469.72                 | 508.2                 | 12.19                       | 61.6                      | 32.2                | 324047                          | 31280                     | 30829                     | No           |
| APOE                | ALMDETMK         | Yes               | 469.72                 | 623.3                 | 12.19                       | 61.6                      | 26.2                | 860928                          | 86062                     | 91743                     | No           |
| APOE                | ALMDETMK         | Yes               | 469.72                 | 754.3                 | 12.19                       | 61.6                      | 23.2                | 3039940                         | 316318                    | 322057                    | No           |
| APOE                | ALMDETMK         | Yes               | 469.72                 | 867.4                 | 12.19                       | 61.6                      | 26.2                | 132175                          | 17359                     | 15998                     | No           |
| APOE                | FWDYLR           | No                |                        |                       |                             |                           |                     |                                 |                           |                           |              |
| APOE                | GEVQAMLGQSTEELR  | Yes               | 824.4                  | 616.3                 | 17.92                       | 107.3                     | 38.8                | 160359                          | 62735                     | 51936                     | No           |
| APOE                | GEVQAMLGQSTEELR  | Yes               | 824.4                  | 729.4                 | 17.92                       | 107.3                     | 38.8                | 172436                          | 60538                     | 57131                     | No           |
| APOE                | GEVQAMLGQSTEELR  | Yes               | 824.4                  | 734.4                 | 17.92                       | 107.3                     | 41.8                | 128340                          | 43162                     | 66023                     | No           |
| APOE                | GEVQAMLGQSTEELR  | Yes               | 824.4                  | 919.4                 | 17.92                       | 107.3                     | 47.8                | 329516                          | 123116                    | 112134                    | No           |
| APOE                | LAVYQAGAR        | Yes               | 474.77                 | 502.3                 | 10.55                       | 62.2                      | 32.4                | 464439                          | 1875459                   | 1407023                   | No           |
| APOE                | LAVYQAGAR        | Yes               | 474.77                 | 665.3                 | 10.55                       | 62.2                      | 26.4                | 858280                          | 3581457                   | 2409376                   | No           |
| APOE                | LAVYQAGAR        | Yes               | 474.77                 | 764.4                 | 10.55                       | 62.2                      | 23.4                | 579284                          | 2469472                   | 1785851                   | No           |
| APOE                | LAVYQAGAR        | Yes               | 474.77                 | 835.4                 | 10.55                       | 62.2                      | 26.4                | 272824                          | 970277                    | 670810                    | No           |
| APOE                | LGPLVEQGR        | Yes               | 484.78                 | 588.3                 | 12.27                       | 63.5                      | 29.8                | 1255147                         | 8739975                   | 5413619                   | No           |

**Table S5.** MRM assay of individual proteins.

| Protein<br>(_HUMAN) | Peptide                 | MS/MS<br>spectrum | Precursor ion<br>(m/z) | Fragment ion<br>(m/z) | Retention time<br>(minutes) | Decustering<br>potential | Collision<br>energy | Area of<br>synthetic<br>peptide | Area in control<br>sample | Area in disease<br>sample | Interference |
|---------------------|-------------------------|-------------------|------------------------|-----------------------|-----------------------------|--------------------------|---------------------|---------------------------------|---------------------------|---------------------------|--------------|
| APOE                | LGPLVEQGR               | Yes               | 484.78                 | 701.4                 | 12.27                       | 63.5                     | 32.8                | 548143                          | 3552824                   | 2229051                   | No           |
| APOE                | LGPLVEQGR               | Yes               | 484.78                 | 798.4                 | 12.27                       | 63.5                     | 32.8                | 153891                          | 971776                    | 653830                    | No           |
| APOE                | LGPLVEQGR               | Yes               | 484.78                 | 855.5                 | 12.27                       | 63.5                     | 32.8                | 245430                          | 1710796                   | 1027637                   | No           |
| APOE                | SELEEQLTPVAEETR         | Yes               | 865.93                 | 459.2                 | 15.38                       | 112.7                    | 46.6                | 98957                           | 41157                     | 37671                     | No           |
| APOE                | SELEEQLTPVAEETR         | Yes               | 865.93                 | 801.4                 | 15.38                       | 112.7                    | 40.6                | 480014                          | 182608                    | 232636                    | No           |
| APOE                | SELEEQLTPVAEETR         | Yes               | 865.93                 | 902.5                 | 15.38                       | 112.7                    | 40.6                | 282948                          | 111473                    | 128210                    | No           |
| APOE                | SELEEQLTPVAEETR         | Yes               | 865.93                 | 930.4                 | 15.38                       | 112.7                    | 37.6                | 110336                          | 38737                     | 44588                     | No           |
| APOE                | SWFEPLVEDMQR            | Yes               | 768.86                 | 274.1                 | 23.75                       | 100.2                    | 45.3                | 890677                          | 451999                    | 340770                    | No           |
| APOE                | SWFEPLVEDMQR            | Yes               | 768.86                 | 421.2                 | 23.75                       | 100.2                    | 36.3                | 334159                          | 193086                    | 151397                    | No           |
| APOE                | SWFEPLVEDMQR            | Yes               | 768.86                 | 678.3                 | 23.75                       | 100.2                    | 39.3                | 146920                          | 88778                     | 58862                     | No           |
| APOE                | SWFEPLVEDMQR            | Yes               | 768.86                 | 987.5                 | 23.75                       | 100.2                    | 45.3                | 480159                          | 235966                    | 169565                    | No           |
| APOE                | WELALGR                 | Yes               | 422.74                 | 316.1                 | 18.36                       | 55.5                     | 21.1                | 403709                          | 887870                    | 1003357                   | No           |
| APOE                | WELALGR                 | Yes               | 422.74                 | 345.2                 | 18.36                       | 55.5                     | 30.1                | 137633                          | 217482                    | 265039                    | No           |
| APOE                | WELALGR                 | Yes               | 422.74                 | 529.3                 | 18.36                       | 55.5                     | 21.1                | 531586                          | 1582080                   | 1347490                   | No           |
| APOE                | WELALGR                 | Yes               | 422.74                 | 658.4                 | 18.36                       | 55.5                     | 30.1                | 276357                          | 664598                    | 673060                    | No           |
| APOE                | WVQTLSEQVQEELLSSQVTQELR | No                |                        |                       |                             |                          |                     |                                 |                           |                           |              |
| ASM3B               | EIEPEPDFILWTGDDTPHPVPEK | Yes               | 893.75                 | 276.2                 | 21.52                       | 116.3                    | 40.1                | 4054                            | ND                        | ND                        | No           |
| ASM3B               | EIEPEPDFILWTGDDTPHPVPEK | Yes               | 893.75                 | 372.2                 | 21.52                       | 116.3                    | 43.1                | 3423                            | ND                        | ND                        | No           |
| ASM3B               | EIEPEPDFILWTGDDTPHPVPEK | Yes               | 893.75                 | 488.2                 | 21.52                       | 116.3                    | 46.1                | 14160                           | ND                        | ND                        | No           |
| ASM3B               | EIEPEPDFILWTGDDTPHPVPEK | Yes               | 893.75                 | 821.4                 | 21.52                       | 116.3                    | 49.1                | 2901                            | ND                        | ND                        | No           |
| ASM3B               | FWHIADLHLDPDYK          | Yes               | 885.44                 | 310.2                 | 19.64                       | 115.2                    | 50.5                | 15815                           | ND                        | ND                        | No           |
| ASM3B               | FWHIADLHLDPDYK          | Yes               | 885.44                 | 471.2                 | 19.64                       | 115.2                    | 44.5                | 15824                           | ND                        | ND                        | No           |
| ASM3B               | FWHIADLHLDPDYK          | Yes               | 885.44                 | 522.3                 | 19.64                       | 115.2                    | 47.5                | 23658                           | ND                        | ND                        | No           |

**Table S5.** MRM assay of individual proteins.

| Protein<br>(_HUMAN) | Peptide          | MS/MS<br>spectrum | Precursor ion<br>(m/z) | Fragment ion<br>(m/z) | Retention time<br>(minutes) | Declustering<br>potential | Collision<br>energy | Area of<br>synthetic<br>peptide | Area in control<br>sample | Area in disease<br>sample | Interference |
|---------------------|------------------|-------------------|------------------------|-----------------------|-----------------------------|---------------------------|---------------------|---------------------------------|---------------------------|---------------------------|--------------|
| ASM3B               | FWHIADLHLDPDYK   | Yes               | 885.44                 | 637.3                 | 19.64                       | 115.2                     | 47.5                | 3772                            | ND                        | ND                        | No           |
| ASM3B               | IAGDQSTLQR       | Yes               | 544.79                 | 604.3                 | 6.99                        | 71.3                      | 35.5                | 13771                           | ND                        | ND                        | No           |
| ASM3B               | IAGDQSTLQR       | Yes               | 544.79                 | 732.4                 | 6.99                        | 71.3                      | 35.5                | 10240                           | ND                        | ND                        | No           |
| ASM3B               | IAGDQSTLQR       | Yes               | 544.79                 | 904.4                 | 6.99                        | 71.3                      | 26.5                | 25293                           | ND                        | ND                        | No           |
| ASM3B               | IAGDQSTLQR       | Yes               | 544.79                 | 975.5                 | 6.99                        | 71.3                      | 26.5                | 11561                           | ND                        | ND                        | No           |
| ASM3B               | LGEAAVLEIVER     | Yes               | 649.87                 | 999.6                 | 19.54                       | 84.8                      | 37.1                | 13209                           | ND                        | ND                        | No           |
| ASM3B               | LGEAAVLEIVER     | Yes               | 649.87                 | 516.3                 | 19.54                       | 84.8                      | 28.1                | 10637                           | ND                        | ND                        | No           |
| ASM3B               | LGEAAVLEIVER     | Yes               | 649.87                 | 758.4                 | 19.54                       | 84.8                      | 31.1                | 45939                           | ND                        | ND                        | No           |
| ASM3B               | LGEAAVLEIVER     | Yes               | 649.87                 | 857.5                 | 19.54                       | 84.8                      | 31.1                | 28698                           | ND                        | ND                        | No           |
| ASM3B               | VIAGQFFGHHHTDSFR | No                |                        |                       |                             |                           |                     |                                 |                           |                           |              |
| AT2A2               | AEIGIAMGSGTAVAK  | Yes               | 688.4                  | 555.3                 | 15.70                       | 100                       | 35.8                | ND                              | ND                        | ND                        | No           |
| AT2A2               | AEIGIAMGSGTAVAK  | Yes               | 688.4                  | 633.4                 | 15.70                       | 100                       | 35.8                | ND                              | ND                        | ND                        | No           |
| AT2A2               | AEIGIAMGSGTAVAK  | Yes               | 688.4                  | 821.4                 | 15.70                       | 100                       | 35.8                | ND                              | ND                        | ND                        | No           |
| AT2A2               | AEIGIAMGSGTAVAK  | Yes               | 688.4                  | 892.5                 | 15.70                       | 100                       | 35.8                | ND                              | ND                        | ND                        | No           |
| AT2A2               | IGIFGQDEDVTSK    | Yes               | 704.9                  | 1125.5                | 17.20                       | 100                       | 36.5                | ND                              | ND                        | ND                        | No           |
| AT2A2               | IGIFGQDEDVTSK    | Yes               | 704.9                  | 335.2                 | 17.20                       | 100                       | 36.5                | ND                              | 25549                     | ND                        | No           |
| AT2A2               | IGIFGQDEDVTSK    | Yes               | 704.9                  | 793.4                 | 17.20                       | 100                       | 36.5                | ND                              | 171814                    | ND                        | No           |
| AT2A2               | IGIFGQDEDVTSK    | Yes               | 704.9                  | 978.4                 | 17.20                       | 100                       | 36.5                | ND                              | 2018                      | ND                        | No           |
| AT2A2               | NMLFSGTNIAAGK    | Yes               | 662.3                  | 359.2                 | 17.70                       | 100                       | 34.6                | ND                              | ND                        | ND                        | No           |
| AT2A2               | NMLFSGTNIAAGK    | Yes               | 662.3                  | 731.4                 | 17.70                       | 100                       | 34.6                | ND                              | ND                        | ND                        | No           |
| AT2A2               | NMLFSGTNIAAGK    | Yes               | 662.3                  | 818.4                 | 17.70                       | 100                       | 34.6                | ND                              | ND                        | ND                        | No           |
| AT2A2               | NMLFSGTNIAAGK    | Yes               | 662.3                  | 965.5                 | 17.70                       | 100                       | 34.6                | ND                              | ND                        | ND                        | No           |
| ATS1                | ASFGSGPAVEWIPK   | Yes               | 723.38                 | 357.3                 | 18.43                       | 94.3                      | 34.3                | 104905                          | ND                        | ND                        | No           |



**Table S5.** MRM assay of individual proteins.

| <b>Protein<br/>(_HUMAN)</b> | <b>Peptide</b>        | <b>MS/MS<br/>spectrum</b> | <b>Precursor ion<br/>(m/z)</b> | <b>Fragment ion<br/>(m/z)</b> | <b>Retention time<br/>(minutes)</b> | <b>Decustering<br/>potential</b> | <b>Collision<br/>energy</b> | <b>Area of<br/>synthetic<br/>peptide</b> | <b>Area in control<br/>sample</b> | <b>Area in disease<br/>sample</b> | <b>Interference</b> |
|-----------------------------|-----------------------|---------------------------|--------------------------------|-------------------------------|-------------------------------------|----------------------------------|-----------------------------|------------------------------------------|-----------------------------------|-----------------------------------|---------------------|
| ATS1                        | ASFGSGPAVEWIPK        | Yes                       | 723.38                         | 543.3                         | 18.43                               | 94.3                             | 34.3                        | 38197                                    | ND                                | ND                                | No                  |
| ATS1                        | ASFGSGPAVEWIPK        | Yes                       | 723.38                         | 939.5                         | 18.43                               | 94.3                             | 34.3                        | 89861                                    | ND                                | ND                                | No                  |
| ATS1                        | ASFGSGPAVEWIPK        | Yes                       | 723.38                         | 996.6                         | 18.43                               | 94.3                             | 34.3                        | 86229                                    | ND                                | ND                                | No                  |
| ATS1                        | GAFYLLGEAYFIQPLPAASER | Yes                       | 1157.1                         | 552.3                         | 24.55                               | 150.3                            | 50.4                        | 24102                                    | ND                                | ND                                | No                  |
| ATS1                        | GAFYLLGEAYFIQPLPAASER | Yes                       | 1157.1                         | 630.3                         | 24.55                               | 150.3                            | 50.4                        | 48873                                    | ND                                | ND                                | No                  |
| ATS1                        | GAFYLLGEAYFIQPLPAASER | Yes                       | 1157.1                         | 840.5                         | 24.55                               | 150.3                            | 53.4                        | 88743                                    | ND                                | ND                                | No                  |
| ATS1                        | GAFYLLGEAYFIQPLPAASER | Yes                       | 1157.1                         | 968.5                         | 24.55                               | 150.3                            | 50.4                        | 41295                                    | ND                                | ND                                | No                  |
| ATS1                        | GIGYFFVLQPK           | Yes                       | 634.86                         | 485.3                         | 22.47                               | 82.9                             | 30.4                        | 23844                                    | ND                                | ND                                | No                  |
| ATS1                        | GIGYFFVLQPK           | Yes                       | 634.86                         | 584.4                         | 22.47                               | 82.9                             | 30.4                        | 33265                                    | ND                                | ND                                | No                  |
| ATS1                        | GIGYFFVLQPK           | Yes                       | 634.86                         | 731.4                         | 22.47                               | 82.9                             | 30.4                        | 49849                                    | ND                                | ND                                | No                  |
| ATS1                        | GIGYFFVLQPK           | Yes                       | 634.86                         | 878.5                         | 22.47                               | 82.9                             | 27.4                        | 65175                                    | ND                                | ND                                | No                  |
| ATS1                        | GPEVTSNAALTLR         | Yes                       | 664.86                         | 284.1                         | 12.86                               | 86.8                             | 37.8                        | 83180                                    | ND                                | ND                                | No                  |
| ATS1                        | GPEVTSNAALTLR         | Yes                       | 664.86                         | 758.5                         | 12.86                               | 86.8                             | 31.8                        | 7469                                     | ND                                | ND                                | No                  |
| ATS1                        | GPEVTSNAALTLR         | Yes                       | 664.86                         | 845.5                         | 12.86                               | 86.8                             | 34.8                        | 12494                                    | ND                                | ND                                | No                  |
| ATS1                        | GPEVTSNAALTLR         | Yes                       | 664.86                         | 946.5                         | 12.86                               | 86.8                             | 31.8                        | 13212                                    | ND                                | ND                                | No                  |
| ATS1                        | HYLLTLFSVAAR          | No                        |                                |                               |                                     |                                  |                             |                                          |                                   |                                   |                     |
| ATS12                       | EGSGYVDIGLIPK         | Yes                       | 674.36                         | 357.3                         | 17.33                               | 88                               | 29.2                        | 217810                                   | ND                                | ND                                | No                  |
| ATS12                       | EGSGYVDIGLIPK         | Yes                       | 674.36                         | 527.4                         | 17.33                               | 88                               | 32.2                        | 179513                                   | ND                                | ND                                | No                  |
| ATS12                       | EGSGYVDIGLIPK         | Yes                       | 674.36                         | 755.5                         | 17.33                               | 88                               | 32.2                        | 315214                                   | ND                                | ND                                | No                  |
| ATS12                       | EGSGYVDIGLIPK         | Yes                       | 674.36                         | 854.5                         | 17.33                               | 88                               | 32.2                        | 192788                                   | ND                                | ND                                | No                  |
| ATS12                       | LILLEEEEEQGLK         | Yes                       | 707.4                          | 340.3                         | 17.76                               | 92.3                             | 33.6                        | 324526                                   | ND                                | ND                                | No                  |
| ATS12                       | LILLEEEEEQGLK         | Yes                       | 707.4                          | 574.3                         | 17.76                               | 92.3                             | 42.6                        | 47451                                    | ND                                | ND                                | No                  |
| ATS12                       | LILLEEEEEQGLK         | Yes                       | 707.4                          | 832.4                         | 17.76                               | 92.3                             | 33.6                        | 93496                                    | ND                                | ND                                | No                  |

**Table S5.** MRM assay of individual proteins.

| Protein<br>(_HUMAN) | Peptide               | MS/MS<br>spectrum | Precursor ion<br>(m/z) | Fragment ion<br>(m/z) | Retention time<br>(minutes) | Declustering<br>potential | Collision<br>energy | Area of<br>synthetic<br>peptide | Area in control<br>sample | Area in disease<br>sample | Interference                           |
|---------------------|-----------------------|-------------------|------------------------|-----------------------|-----------------------------|---------------------------|---------------------|---------------------------------|---------------------------|---------------------------|----------------------------------------|
| ATS12               | LILLEEEEQGLK          | Yes               | 707.4                  | 961.4                 | 17.76                       | 92.3                      | 33.6                | 121003                          | ND                        | ND                        | No                                     |
| ATS12               | QLQYDPTPLTWSK         | Yes               | 788.9                  | 370.2                 | 16.73                       | 102.8                     | 37.2                | 61555                           | ND                        | ND                        | No                                     |
| ATS12               | QLQYDPTPLTWSK         | Yes               | 788.9                  | 521.3                 | 16.73                       | 102.8                     | 46.2                | 30947                           | ND                        | ND                        | No                                     |
| ATS12               | QLQYDPTPLTWSK         | Yes               | 788.9                  | 731.4                 | 16.73                       | 102.8                     | 46.2                | 51537                           | ND                        | ND                        | No                                     |
| ATS12               | QLQYDPTPLTWSK         | Yes               | 788.9                  | 929.5                 | 16.73                       | 102.8                     | 37.2                | 55517                           | ND                        | ND                        | No                                     |
| ATS12               | QWQDSSTQPELSSR        | Yes               | 824.88                 | 315.1                 | 10.37                       | 107.4                     | 47.8                | 3016                            | ND                        | ND                        | No                                     |
| ATS12               | QWQDSSTQPELSSR        | Yes               | 824.88                 | 349.2                 | 10.37                       | 107.4                     | 38.8                | 6269                            | ND                        | ND                        | No                                     |
| ATS12               | QWQDSSTQPELSSR        | Yes               | 824.88                 | 688.4                 | 10.37                       | 107.4                     | 44.8                | 13909                           | ND                        | ND                        | No                                     |
| ATS12               | QWQDSSTQPELSSR        | Yes               | 824.88                 | 917.5                 | 10.37                       | 107.4                     | 38.8                | 1500                            | ND                        | ND                        | No                                     |
| ATS12               | WVETLVVADTK           | Yes               | 630.85                 | 286.2                 | 15.87                       | 82.4                      | 30.3                | 40124                           | 28863                     | 35082                     | Yes (Based on<br>Transition<br>Ratios) |
| ATS12               | WVETLVVADTK           | Yes               | 630.85                 | 533.3                 | 15.87                       | 82.4                      | 39.3                | 11647                           | 28346                     | 22495                     | Yes (Based on<br>Transition<br>Ratios) |
| ATS12               | WVETLVVADTK           | Yes               | 630.85                 | 846.5                 | 15.87                       | 82.4                      | 30.3                | 4577                            | ND                        | ND                        | No                                     |
| ATS12               | WVETLVVADTK           | Yes               | 630.85                 | 975.5                 | 15.87                       | 82.4                      | 30.3                | 7920                            | ND                        | ND                        | No                                     |
| ATS19               | EQPILLSEK             | Yes               | 528.8                  | 258.1                 | 12.44                       | 69.2                      | 25.8                | 644654                          | ND                        | ND                        | No                                     |
| ATS19               | EQPILLSEK             | Yes               | 528.8                  | 476.3                 | 12.44                       | 69.2                      | 25.8                | 165208                          | ND                        | ND                        | No                                     |
| ATS19               | EQPILLSEK             | Yes               | 528.8                  | 589.4                 | 12.44                       | 69.2                      | 34.8                | 326760                          | ND                        | ND                        | No                                     |
| ATS19               | EQPILLSEK             | Yes               | 528.8                  | 799.5                 | 12.44                       | 69.2                      | 25.8                | 833853                          | ND                        | ND                        | No                                     |
| ATS19               | GQNLGDVSWSR           | No                |                        |                       |                             |                           |                     |                                 |                           |                           |                                        |
| ATS19               | LRPPPPSEGEDEELESQELPR | Yes               | 845.07                 | 270.2                 | 12.90                       | 110                       | 43.6                | 45680                           | ND                        | ND                        | No                                     |
| ATS19               | LRPPPPSEGEDEELESQELPR | Yes               | 845.07                 | 272.2                 | 12.90                       | 110                       | 37.6                | 106618                          | ND                        | ND                        | No                                     |

**Table S5.** MRM assay of individual proteins.

| Protein<br>(_HUMAN) | Peptide               | MS/MS<br>spectrum | Precursor ion<br>(m/z) | Fragment ion<br>(m/z) | Retention time<br>(minutes) | Declustering<br>potential | Collision<br>energy | Area of<br>synthetic<br>peptide | Area in control<br>sample | Area in disease<br>sample | Interference |
|---------------------|-----------------------|-------------------|------------------------|-----------------------|-----------------------------|---------------------------|---------------------|---------------------------------|---------------------------|---------------------------|--------------|
| ATS19               | LRPPPPSEGEDEELESQELPR | Yes               | 845.07                 | 642.4                 | 12.90                       | 110                       | 43.6                | 6934                            | ND                        | ND                        | No           |
| ATS19               | LRPPPPSEGEDEELESQELPR | Yes               | 845.07                 | 971.5                 | 12.90                       | 110                       | 43.6                | 10641                           | ND                        | ND                        | No           |
| ATS19               | NISIVDNEK             | Yes               | 516.27                 | 390.2                 | 10.17                       | 67.6                      | 34.2                | 30211                           | ND                        | ND                        | No           |
| ATS19               | NISIVDNEK             | Yes               | 516.27                 | 604.3                 | 10.17                       | 67.6                      | 25.2                | 31720                           | ND                        | ND                        | No           |
| ATS19               | NISIVDNEK             | Yes               | 516.27                 | 717.4                 | 10.17                       | 67.6                      | 22.2                | 15456                           | ND                        | ND                        | No           |
| ATS19               | NISIVDNEK             | Yes               | 516.27                 | 804.4                 | 10.17                       | 67.6                      | 25.2                | 138315                          | ND                        | ND                        | No           |
| ATS19               | SVAPVPLEEPVEGR        | Yes               | 739.9                  | 355.2                 | 13.49                       | 96.4                      | 38.1                | 41872                           | ND                        | ND                        | No           |
| ATS19               | SVAPVPLEEPVEGR        | Yes               | 739.9                  | 454.3                 | 13.49                       | 96.4                      | 32.1                | 62181                           | ND                        | ND                        | No           |
| ATS19               | SVAPVPLEEPVEGR        | Yes               | 739.9                  | 557.3                 | 13.49                       | 96.4                      | 44.1                | 46254                           | ND                        | ND                        | No           |
| ATS19               | SVAPVPLEEPVEGR        | Yes               | 739.9                  | 815.4                 | 13.49                       | 96.4                      | 44.1                | 36042                           | ND                        | ND                        | No           |
| BAGE1               | AVFLALSAQLLQAR        | No                |                        |                       |                             |                           |                     |                                 |                           |                           |              |
| BAGE1               | EESPVVSWR             | Yes               | 544.77                 | 448.2                 | 13.13                       | 71.3                      | 26.5                | 14288                           | ND                        | ND                        | No           |
| BAGE1               | EESPVVSWR             | Yes               | 544.77                 | 646.4                 | 13.13                       | 71.3                      | 23.5                | 2497                            | ND                        | ND                        | No           |
| BAGE1               | EESPVVSWR             | Yes               | 544.77                 | 743.4                 | 13.13                       | 71.3                      | 35.5                | 6164                            | ND                        | ND                        | No           |
| BAGE1               | EESPVVSWR             | Yes               | 544.77                 | 830.5                 | 13.13                       | 71.3                      | 35.5                | 2621                            | ND                        | ND                        | No           |
| BAGE2               | EESPVVSWR             | Yes               | 544.77                 | 448.2                 | 13.13                       | 71.3                      | 26.5                | 14288                           | ND                        | ND                        | No           |
| BAGE2               | EESPVVSWR             | Yes               | 544.77                 | 646.4                 | 13.13                       | 71.3                      | 23.5                | 2497                            | ND                        | ND                        | No           |
| BAGE2               | EESPVVSWR             | Yes               | 544.77                 | 743.4                 | 13.13                       | 71.3                      | 35.5                | 6164                            | ND                        | ND                        | No           |
| BAGE2               | EESPVVSWR             | Yes               | 544.77                 | 830.5                 | 13.13                       | 71.3                      | 35.5                | 2621                            | ND                        | ND                        | No           |
| BAGE3               | EESPVVSWR             | Yes               | 544.77                 | 448.2                 | 13.13                       | 71.3                      | 26.5                | 14288                           | ND                        | ND                        | No           |
| BAGE3               | EESPVVSWR             | Yes               | 544.77                 | 646.4                 | 13.13                       | 71.3                      | 23.5                | 2497                            | ND                        | ND                        | No           |
| BAGE3               | EESPVVSWR             | Yes               | 544.77                 | 743.4                 | 13.13                       | 71.3                      | 35.5                | 6164                            | ND                        | ND                        | No           |
| BAGE3               | EESPVVSWR             | Yes               | 544.77                 | 830.5                 | 13.13                       | 71.3                      | 35.5                | 2621                            | ND                        | ND                        | No           |

**Table S5.** MRM assay of individual proteins.

| Protein<br>(_HUMAN) | Peptide                     | MS/MS<br>spectrum | Precursor ion<br>(m/z) | Fragment ion<br>(m/z) | Retention time<br>(minutes) | Declustering<br>potential | Collision<br>energy | Area of<br>synthetic<br>peptide | Area in control<br>sample | Area in disease<br>sample | Interference |
|---------------------|-----------------------------|-------------------|------------------------|-----------------------|-----------------------------|---------------------------|---------------------|---------------------------------|---------------------------|---------------------------|--------------|
| BAGE4               | EESPVVSWWLEPEDGTAL          | No                |                        |                       |                             |                           |                     |                                 |                           |                           |              |
| BAGE5               | EESPVVSWR                   | Yes               | 544.77                 | 448.2                 | 13.13                       | 71.3                      | 26.5                | 14288                           | ND                        | ND                        | No           |
| BAGE5               | EESPVVSWR                   | Yes               | 544.77                 | 646.4                 | 13.13                       | 71.3                      | 23.5                | 2497                            | ND                        | ND                        | No           |
| BAGE5               | EESPVVSWR                   | Yes               | 544.77                 | 743.4                 | 13.13                       | 71.3                      | 35.5                | 6164                            | ND                        | ND                        | No           |
| BAGE5               | EESPVVSWR                   | Yes               | 544.77                 | 830.5                 | 13.13                       | 71.3                      | 35.5                | 2621                            | ND                        | ND                        | No           |
| BASP1               | AAEAAAAPAESAAPAAGEEPSK      | Yes               | 983.97                 | 414.2                 | 9.12                        | 127.9                     | 51.8                | 143621                          | ND                        | ND                        | No           |
| BASP1               | AAEAAAAPAESAAPAAGEEPSK      | Yes               | 983.97                 | 485.2                 | 9.12                        | 127.9                     | 48.8                | 329148                          | ND                        | ND                        | No           |
| BASP1               | AAEAAAAPAESAAPAAGEEPSK      | Yes               | 983.97                 | 556.3                 | 9.12                        | 127.9                     | 42.8                | 580012                          | ND                        | ND                        | No           |
| BASP1               | AAEAAAAPAESAAPAAGEEPSK      | Yes               | 983.97                 | 885.4                 | 9.12                        | 127.9                     | 54.8                | 148879                          | ND                        | ND                        | No           |
| BASP1               | AEGAATEEEGTPK               | Yes               | 645.3                  | 258.1                 | 6.68                        | 84.2                      | 39.9                | 577396                          | ND                        | ND                        | No           |
| BASP1               | AEGAATEEEGTPK               | Yes               | 645.3                  | 789.4                 | 6.68                        | 84.2                      | 33.9                | 210898                          | ND                        | ND                        | No           |
| BASP1               | AEGAATEEEGTPK               | Yes               | 645.3                  | 890.4                 | 6.68                        | 84.2                      | 30.9                | 341863                          | ND                        | ND                        | No           |
| BASP1               | AEGAATEEEGTPK               | Yes               | 645.3                  | 961.4                 | 6.68                        | 84.2                      | 30.9                | 234980                          | ND                        | ND                        | No           |
| BASP1               | APEQEQAAPGPAAGGEAPK         | Yes               | 592.62                 | 629.3                 | 8.19                        | 77.4                      | 33.8                | 134390                          | ND                        | ND                        | No           |
| BASP1               | APEQEQAAPGPAAGGEAPK         | Yes               | 592.62                 | 754.3                 | 8.19                        | 77.4                      | 27.8                | 109555                          | ND                        | ND                        | No           |
| BASP1               | APEQEQAAPGPAAGGEAPK         | Yes               | 592.62                 | 825.4                 | 8.19                        | 77.4                      | 24.8                | 350900                          | ND                        | ND                        | No           |
| BASP1               | APEQEQAAPGPAAGGEAPK         | Yes               | 592.62                 | 951.5                 | 8.19                        | 77.4                      | 27.8                | 94107                           | ND                        | ND                        | No           |
| BASP1               | AQGPAASAEPPKVEAPAANSQTQTVTK | No                |                        |                       |                             |                           |                     |                                 |                           |                           |              |
| BASP1               | EKPDQDAEGK                  | Yes               | 558.76                 | 404.2                 | 5.86                        | 73.1                      | 36.1                | 58731                           | ND                        | ND                        | No           |
| BASP1               | EKPDQDAEGK                  | Yes               | 558.76                 | 647.3                 | 5.86                        | 73.1                      | 36.1                | 40234                           | ND                        | ND                        | No           |
| BASP1               | EKPDQDAEGK                  | Yes               | 558.76                 | 859.4                 | 5.86                        | 73.1                      | 30.1                | 452533                          | ND                        | ND                        | No           |
| BASP1               | EKPDQDAEGK                  | Yes               | 558.76                 | 913.4                 | 5.86                        | 73.1                      | 30.1                | 8714                            | ND                        | ND                        | No           |
| BASP1               | ESEPQAAAEPAAEK              | Yes               | 714.34                 | 515.3                 | 7.80                        | 93.1                      | 42.9                | 499201                          | ND                        | ND                        | No           |

**Table S5.** MRM assay of individual proteins.

| Protein<br>(_HUMAN) | Peptide               | MS/MS<br>spectrum | Precursor ion<br>(m/z) | Fragment ion<br>(m/z) | Retention time<br>(minutes) | Declustering<br>potential | Collision<br>energy | Area of<br>synthetic<br>peptide | Area in control<br>sample | Area in disease<br>sample | Interference |
|---------------------|-----------------------|-------------------|------------------------|-----------------------|-----------------------------|---------------------------|---------------------|---------------------------------|---------------------------|---------------------------|--------------|
| BASP1               | ESEPQAAAEPAEAK        | Yes               | 714.34                 | 644.3                 | 7.80                        | 93.1                      | 36.9                | 125610                          | ND                        | ND                        | No           |
| BASP1               | ESEPQAAAEPAEAK        | Yes               | 714.34                 | 786.4                 | 7.80                        | 93.1                      | 33.9                | 308021                          | ND                        | ND                        | No           |
| BASP1               | ESEPQAAAEPAEAK        | Yes               | 714.34                 | 857.4                 | 7.80                        | 93.1                      | 42.9                | 310099                          | ND                        | ND                        | No           |
| BASP1               | ETPAATEAPSSTPK        | Yes               | 693.84                 | 616.3                 | 7.70                        | 90.5                      | 42                  | 528487                          | 2285                      | 1294                      | No           |
| BASP1               | ETPAATEAPSSTPK        | Yes               | 693.84                 | 816.4                 | 7.70                        | 90.5                      | 33                  | 312266                          | 656                       | 970                       | No           |
| BASP1               | ETPAATEAPSSTPK        | Yes               | 693.84                 | 917.5                 | 7.70                        | 90.5                      | 33                  | 528706                          | 1763                      | 1960                      | No           |
| BASP1               | ETPAATEAPSSTPK        | Yes               | 693.84                 | 988.5                 | 7.70                        | 90.5                      | 39                  | 292104                          | 705                       | 863                       | No           |
| BASP1               | GYNVNDK               | Yes               | 469.71                 | 276.2                 | 7.25                        | 61.6                      | 32.2                | 188398                          | ND                        | ND                        | No           |
| BASP1               | GYNVNDK               | Yes               | 469.71                 | 505.2                 | 7.25                        | 61.6                      | 26.2                | 259493                          | ND                        | ND                        | No           |
| BASP1               | GYNVNDK               | Yes               | 469.71                 | 604.3                 | 7.25                        | 61.6                      | 23.2                | 275282                          | ND                        | ND                        | No           |
| BASP1               | GYNVNDK               | Yes               | 469.71                 | 718.3                 | 7.25                        | 61.6                      | 23.2                | 659710                          | ND                        | ND                        | No           |
| BASP1               | SDGAPASDSKPGSSEAAPSSK | Yes               | 644.96                 | 260.1                 | 6.28                        | 84.2                      | 36.4                | 52850                           | ND                        | ND                        | No           |
| BASP1               | SDGAPASDSKPGSSEAAPSSK | Yes               | 644.96                 | 331.1                 | 6.28                        | 84.2                      | 27.4                | 38204                           | ND                        | ND                        | No           |
| BASP1               | SDGAPASDSKPGSSEAAPSSK | Yes               | 644.96                 | 418.2                 | 6.28                        | 84.2                      | 36.4                | 15204                           | ND                        | ND                        | No           |
| BASP1               | SDGAPASDSKPGSSEAAPSSK | Yes               | 644.96                 | 586.2                 | 6.28                        | 84.2                      | 33.4                | 7243                            | ND                        | ND                        | No           |
| BASP1               | TEAPAAPAAQETK         | Yes               | 642.83                 | 541.3                 | 7.39                        | 83.9                      | 27.8                | 1121835                         | ND                        | ND                        | No           |
| BASP1               | TEAPAAPAAQETK         | Yes               | 642.83                 | 744.4                 | 7.39                        | 83.9                      | 33.8                | 2198989                         | ND                        | ND                        | No           |
| BASP1               | TEAPAAPAAQETK         | Yes               | 642.83                 | 815.4                 | 7.39                        | 83.9                      | 39.8                | 677726                          | ND                        | ND                        | No           |
| BASP1               | TEAPAAPAAQETK         | Yes               | 642.83                 | 983.5                 | 7.39                        | 83.9                      | 30.8                | 1128052                         | ND                        | ND                        | No           |
| BAX                 | TGALLLQGFQDR          | Yes               | 716.4                  | 343.2                 | 21.64                       | 93.4                      | 34                  | 15777                           | ND                        | ND                        | No           |
| BAX                 | TGALLLQGFQDR          | Yes               | 716.4                  | 456.3                 | 21.64                       | 93.4                      | 34                  | 14444                           | ND                        | ND                        | No           |
| BAX                 | TGALLLQGFQDR          | Yes               | 716.4                  | 863.4                 | 21.64                       | 93.4                      | 34                  | 16541                           | ND                        | ND                        | No           |
| BAX                 | TGALLLQGFQDR          | Yes               | 716.4                  | 976.5                 | 21.64                       | 93.4                      | 34                  | 12140                           | ND                        | ND                        | No           |

**Table S5.** MRM assay of individual proteins.

| Protein<br>(_HUMAN) | Peptide                | MS/MS<br>spectrum | Precursor ion<br>(m/z) | Fragment ion<br>(m/z) | Retention time<br>(minutes) | Decustering<br>potential | Collision<br>energy | Area of<br>synthetic<br>peptide | Area in control<br>sample | Area in disease<br>sample | Interference                           |
|---------------------|------------------------|-------------------|------------------------|-----------------------|-----------------------------|--------------------------|---------------------|---------------------------------|---------------------------|---------------------------|----------------------------------------|
| BAX                 | VPELIR                 | Yes               | 363.73                 | 288.2                 | 11.73                       | 47.9                     | 27.5                | 11353                           | ND                        | ND                        | No                                     |
| BAX                 | VPELIR                 | Yes               | 363.73                 | 401.3                 | 11.73                       | 47.9                     | 27.5                | 67820                           | ND                        | ND                        | No                                     |
| BAX                 | VPELIR                 | Yes               | 363.73                 | 530.3                 | 11.73                       | 47.9                     | 21.5                | 37218                           | ND                        | ND                        | No                                     |
| BAX                 | VPELIR                 | Yes               | 363.73                 | 627.4                 | 11.73                       | 47.9                     | 18.5                | 35485                           | ND                        | ND                        | No                                     |
| BAX                 | VVALFYFASK             | Yes               | 572.82                 | 270.2                 | 21.69                       | 74.9                     | 24.7                | 9531                            | ND                        | ND                        | No                                     |
| BAX                 | VVALFYFASK             | Yes               | 572.82                 | 762.4                 | 21.69                       | 74.9                     | 27.7                | 4998                            | ND                        | ND                        | No                                     |
| BAX                 | VVALFYFASK             | Yes               | 572.82                 | 875.5                 | 21.69                       | 74.9                     | 27.7                | 3626                            | ND                        | ND                        | No                                     |
| BAX                 | VVALFYFASK             | Yes               | 572.82                 | 946.5                 | 21.69                       | 74.9                     | 27.7                | 7553                            | ND                        | ND                        | No                                     |
| BDNF                | DADLYTSR               | Yes               | 470.72                 | 363.2                 | 8.19                        | 61.7                     | 20.2                | 57153                           | ND                        | ND                        | No                                     |
| BDNF                | DADLYTSR               | Yes               | 470.72                 | 526.3                 | 8.19                        | 61.7                     | 20.2                | 86079                           | ND                        | ND                        | No                                     |
| BDNF                | DADLYTSR               | Yes               | 470.72                 | 639.3                 | 8.19                        | 61.7                     | 23.2                | 24078                           | ND                        | ND                        | No                                     |
| BDNF                | DADLYTSR               | Yes               | 470.72                 | 754.4                 | 8.19                        | 61.7                     | 20.2                | 52638                           | ND                        | ND                        | No                                     |
| BDNF                | GLTSLADTFEHVIEELLDEDQK | No                |                        |                       |                             |                          |                     |                                 |                           |                           |                                        |
| BDNF                | GQGGLAYPGVR            | No                |                        |                       |                             |                          |                     |                                 |                           |                           |                                        |
| BDNF                | QYFYETK                | Yes               | 489.73                 | 377.2                 | 10.86                       | 64.2                     | 24                  | 60836                           | ND                        | ND                        | No                                     |
| BDNF                | QYFYETK                | Yes               | 489.73                 | 540.3                 | 10.86                       | 64.2                     | 24                  | 83319                           | ND                        | ND                        | No                                     |
| BDNF                | QYFYETK                | Yes               | 489.73                 | 687.3                 | 10.86                       | 64.2                     | 24                  | 42666                           | ND                        | ND                        | No                                     |
| BDNF                | QYFYETK                | Yes               | 489.73                 | 850.4                 | 10.86                       | 64.2                     | 27                  | 6672                            | ND                        | ND                        | No                                     |
| BDNF                | THGTLESVNGPK           | Yes               | 413.88                 | 301.2                 | 7.36                        | 54.4                     | 15.7                | 67027                           | 4909                      | ND                        | No                                     |
| BDNF                | THGTLESVNGPK           | Yes               | 413.88                 | 510.3                 | 7.36                        | 54.4                     | 18.7                | 67543                           | 2892                      | ND                        | No                                     |
| BDNF                | THGTLESVNGPK           | Yes               | 413.88                 | 601.3                 | 7.36                        | 54.4                     | 18.7                | 98557                           | 1911                      | ND                        | No                                     |
| BDNF                | THGTLESVNGPK           | Yes               | 413.88                 | 726.3                 | 7.36                        | 54.4                     | 18.7                | 12288                           | 6676                      | 12782                     | Yes (Based on<br>Transition<br>Ratios) |

**Table S5.** MRM assay of individual proteins.

| Protein<br>(_HUMAN) | Peptide                | MS/MS<br>spectrum | Precursor ion<br>(m/z) | Fragment ion<br>(m/z) | Retention time<br>(minutes) | Declustering<br>potential | Collision<br>energy | Area of<br>synthetic<br>peptide | Area in control<br>sample | Area in disease<br>sample | Interference |
|---------------------|------------------------|-------------------|------------------------|-----------------------|-----------------------------|---------------------------|---------------------|---------------------------------|---------------------------|---------------------------|--------------|
| BGH3                | ADHHATNGVVHLIDK        | Yes               | 542.95                 | 262.1                 | 10.26                       | 71                        | 34.2                | 28820                           | ND                        | ND                        | No           |
| BGH3                | ADHHATNGVVHLIDK        | Yes               | 542.95                 | 488.3                 | 10.26                       | 71                        | 28.2                | 12521                           | ND                        | ND                        | No           |
| BGH3                | ADHHATNGVVHLIDK        | Yes               | 542.95                 | 625.4                 | 10.26                       | 71                        | 28.2                | 17203                           | ND                        | ND                        | No           |
| BGH3                | ADHHATNGVVHLIDK        | Yes               | 542.95                 | 724.4                 | 10.26                       | 71                        | 28.2                | 13432                           | ND                        | ND                        | No           |
| BGH3                | DILATNGVIHYIDELLIPDSAK | Yes               | 804.1                  | 305.2                 | 24.70                       | 104.7                     | 47.6                | 11267                           | ND                        | ND                        | No           |
| BGH3                | DILATNGVIHYIDELLIPDSAK | Yes               | 804.1                  | 514.3                 | 24.70                       | 104.7                     | 41.6                | 4269                            | ND                        | ND                        | No           |
| BGH3                | DILATNGVIHYIDELLIPDSAK | Yes               | 804.1                  | 517.3                 | 24.70                       | 104.7                     | 41.6                | 35541                           | ND                        | ND                        | No           |
| BGH3                | DILATNGVIHYIDELLIPDSAK | Yes               | 804.1                  | 630.3                 | 24.70                       | 104.7                     | 38.6                | 14272                           | ND                        | ND                        | No           |
| BGH3                | EGVYTVFAPTNEAFR        | No                |                        |                       |                             |                           |                     |                                 |                           |                           |              |
| BGH3                | LTLLAPLNSVFK           | Yes               | 658.4                  | 328.2                 | 24.36                       | 85.9                      | 28.5                | 365500                          | 25531                     | 16110                     | No           |
| BGH3                | LTLLAPLNSVFK           | Yes               | 658.4                  | 804.5                 | 24.36                       | 85.9                      | 31.5                | 1113116                         | 47343                     | 33102                     | No           |
| BGH3                | LTLLAPLNSVFK           | Yes               | 658.4                  | 875.5                 | 24.36                       | 85.9                      | 31.5                | 558825                          | 24161                     | 29607                     | No           |
| BGH3                | LTLLAPLNSVFK           | Yes               | 658.4                  | 988.6                 | 24.36                       | 85.9                      | 31.5                | 202592                          | 11767                     | 11877                     | No           |
| BGH3                | SPYQLVLQHSR            | Yes               | 443.24                 | 527.3                 | 13.01                       | 58.2                      | 23.2                | 18749                           | 73709                     | 77319                     | No           |
| BGH3                | SPYQLVLQHSR            | Yes               | 443.24                 | 589.3                 | 13.01                       | 58.2                      | 23.2                | 5117                            | 19906                     | 19298                     | No           |
| BGH3                | SPYQLVLQHSR            | Yes               | 443.24                 | 640.4                 | 13.01                       | 58.2                      | 26.2                | 21391                           | 100486                    | 104425                    | No           |
| BGH3                | SPYQLVLQHSR            | Yes               | 443.24                 | 852.5                 | 13.01                       | 58.2                      | 29.2                | 5538                            | 22051                     | 24502                     | No           |
| BMP2                | INIYEIIPATANSK         | Yes               | 558.99                 | 633.3                 | 18.23                       | 73.1                      | 29.1                | 6734                            | ND                        | ND                        | No           |
| BMP2                | INIYEIIPATANSK         | Yes               | 558.99                 | 688.4                 | 18.23                       | 73.1                      | 29.1                | 37408                           | ND                        | ND                        | No           |
| BMP2                | INIYEIIPATANSK         | Yes               | 558.99                 | 816.5                 | 18.23                       | 73.1                      | 35.1                | 13041                           | ND                        | ND                        | No           |
| BMP2                | INIYEIIPATANSK         | Yes               | 558.99                 | 929.5                 | 18.23                       | 73.1                      | 35.1                | 3967                            | ND                        | ND                        | No           |
| BMP2                | LVNQNASR               | Yes               | 451.25                 | 333.2                 | 5.48                        | 59.2                      | 31.4                | 9208                            | 1450                      | ND                        | No           |
| BMP2                | LVNQNASR               | Yes               | 451.25                 | 575.3                 | 5.48                        | 59.2                      | 22.4                | 12431                           | ND                        | ND                        | No           |

**Table S5.** MRM assay of individual proteins.

| Protein<br>(_HUMAN) | Peptide                  | MS/MS<br>spectrum | Precursor ion<br>(m/z) | Fragment ion<br>(m/z) | Retention time<br>(minutes) | Declustering<br>potential | Collision<br>energy | Area of<br>synthetic<br>peptide | Area in control<br>sample | Area in disease<br>sample | Interference                       |
|---------------------|--------------------------|-------------------|------------------------|-----------------------|-----------------------------|---------------------------|---------------------|---------------------------------|---------------------------|---------------------------|------------------------------------|
| BMP2                | LVNQNASR                 | Yes               | 451.25                 | 689.3                 | 5.48                        | 59.2                      | 22.4                | 73899                           | ND                        | ND                        | No                                 |
| BMP2                | LVNQNASR                 | Yes               | 451.25                 | 788.4                 | 5.48                        | 59.2                      | 25.4                | 12363                           | ND                        | ND                        | No                                 |
| BMP2                | SFHHEESLEELPETS GK       | Yes               | 978.45                 | 372.2                 | 11.14                       | 127.2                     | 48.6                | 5663                            | ND                        | ND                        | No                                 |
| BMP2                | SFHHEESLEELPETS GK       | Yes               | 978.45                 | 509.2                 | 11.14                       | 127.2                     | 51.6                | 2913                            | ND                        | ND                        | No                                 |
| BMP2                | SFHHEESLEELPETS GK       | Yes               | 978.45                 | 618.3                 | 11.14                       | 127.2                     | 51.6                | 9441                            | ND                        | ND                        | No                                 |
| BMP2                | SFHHEESLEELPETS GK       | Yes               | 978.45                 | 638.3                 | 11.14                       | 127.2                     | 54.6                | 3741                            | ND                        | ND                        | No                                 |
| BMP2                | SLHQDEHSWSQIRPLLVTFGHDGK | No                |                        |                       |                             |                           |                     |                                 |                           |                           |                                    |
| BMP2                | WTAQGHANHG FVVEVAHLEEK   | No                |                        |                       |                             |                           |                     |                                 |                           |                           |                                    |
| BST1                | AGLIPLFLVLASR            | No                |                        |                       |                             |                           |                     |                                 |                           |                           |                                    |
| BST1                | ALLSPEQR                 | No                |                        |                       |                             |                           |                     |                                 |                           |                           |                                    |
| BST1                | DIFLGR                   | No                |                        |                       |                             |                           |                     |                                 |                           |                           |                                    |
| BST1                | GEGTSAHLR                | Yes               | 464.24                 | 425.3                 | 7.68                        | 60.9                      | 19.9                | ND                              | ND                        | ND                        | No                                 |
| BST1                | GEGTSAHLR                | Yes               | 464.24                 | 496.3                 | 7.68                        | 60.9                      | 19.9                | ND                              | ND                        | ND                        | No                                 |
| BST1                | GEGTSAHLR                | Yes               | 464.24                 | 583.3                 | 7.68                        | 60.9                      | 25.9                | ND                              | ND                        | ND                        | No                                 |
| BST1                | GEGTSAHLR                | Yes               | 464.24                 | 741.4                 | 7.68                        | 60.9                      | 28.9                | ND                              | ND                        | ND                        | No                                 |
| BST1                | GFFADYEIPNLQK            | Yes               | 771.39                 | 352.2                 | 20.02                       | 100.5                     | 33.4                | 191481                          | 9485                      | 21580                     | No                                 |
| BST1                | GFFADYEIPNLQK            | Yes               | 771.39                 | 599.4                 | 20.02                       | 100.5                     | 36.4                | 337667                          | 24688                     | 26520                     | No                                 |
| BST1                | GFFADYEIPNLQK            | Yes               | 771.39                 | 712.4                 | 20.02                       | 100.5                     | 36.4                | ND                              | ND                        | 7642                      | Yes (Based on<br>Manual<br>Review) |
| BST1                | GFFADYEIPNLQK            | Yes               | 771.39                 | 841.5                 | 20.02                       | 100.5                     | 33.4                | 109775                          | ND                        | 11836                     | No                                 |
| C163A               | EAEFGQGTGPIWLNEVK        | Yes               | 937.97                 | 489.3                 | 19.66                       | 122                       | 40.8                | 33563                           | ND                        | ND                        | No                                 |
| C163A               | EAEFGQGTGPIWLNEVK        | Yes               | 937.97                 | 602.4                 | 19.66                       | 122                       | 43.8                | 29802                           | ND                        | ND                        | No                                 |
| C163A               | EAEFGQGTGPIWLNEVK        | Yes               | 937.97                 | 788.4                 | 19.66                       | 122                       | 40.8                | 40477                           | ND                        | ND                        | No                                 |



**Table S5.** MRM assay of individual proteins.

| Protein<br>(_HUMAN) | Peptide           | MS/MS<br>spectrum | Precursor ion<br>(m/z) | Fragment ion<br>(m/z) | Retention time<br>(minutes) | Decustering<br>potential | Collision<br>energy | Area of<br>synthetic<br>peptide | Area in control<br>sample | Area in disease<br>sample | Interference                       |
|---------------------|-------------------|-------------------|------------------------|-----------------------|-----------------------------|--------------------------|---------------------|---------------------------------|---------------------------|---------------------------|------------------------------------|
| C163A               | EAEFGQGTGPIWLNEVK | Yes               | 937.97                 | 998.6                 | 19.66                       | 122                      | 43.8                | 11610                           | ND                        | ND                        | No                                 |
| C163A               | GENLVHQIQYR       | Yes               | 678.85                 | 301.1                 | 11.60                       | 88.6                     | 41.4                | 12455                           | ND                        | ND                        | No                                 |
| C163A               | GENLVHQIQYR       | Yes               | 678.85                 | 414.2                 | 11.60                       | 88.6                     | 41.4                | 3665                            | ND                        | ND                        | No                                 |
| C163A               | GENLVHQIQYR       | Yes               | 678.85                 | 707.4                 | 11.60                       | 88.6                     | 35.4                | ND                              | ND                        | ND                        | No                                 |
| C163A               | GENLVHQIQYR       | Yes               | 678.85                 | 844.4                 | 11.60                       | 88.6                     | 35.4                | 3301                            | ND                        | ND                        | No                                 |
| C163A               | INPASLDK          | Yes               | 429.24                 | 462.3                 | 9.15                        | 56.4                     | 27.4                | ND                              | 13797                     | 12386                     | Yes (Based on<br>Manual<br>Review) |
| C163A               | INPASLDK          | Yes               | 429.24                 | 533.3                 | 9.15                        | 56.4                     | 30.4                | ND                              | 14940                     | 25923                     | Yes (Based on<br>Manual<br>Review) |
| C163A               | INPASLDK          | Yes               | 429.24                 | 630.3                 | 9.15                        | 56.4                     | 21.4                | 1226484                         | 107772                    | 132639                    | No                                 |
| C163A               | INPASLDK          | Yes               | 429.24                 | 744.4                 | 9.15                        | 56.4                     | 21.4                | 120340                          | 11977                     | 12440                     | No                                 |
| C163A               | LEVFYNGAWGTVGK    | Yes               | 770.89                 | 303.2                 | 18.50                       | 100.4                    | 33.4                | 21426                           | ND                        | ND                        | No                                 |
| C163A               | LEVFYNGAWGTVGK    | Yes               | 770.89                 | 342.2                 | 18.50                       | 100.4                    | 33.4                | 100985                          | ND                        | ND                        | No                                 |
| C163A               | LEVFYNGAWGTVGK    | Yes               | 770.89                 | 461.3                 | 18.50                       | 100.4                    | 36.4                | 45845                           | ND                        | ND                        | No                                 |
| C163A               | LEVFYNGAWGTVGK    | Yes               | 770.89                 | 889.5                 | 18.50                       | 100.4                    | 36.4                | 36643                           | ND                        | ND                        | No                                 |
| C163A               | TSYQVYSK          | Yes               | 488.24                 | 397.2                 | 7.96                        | 64                       | 30                  | 231389                          | 18361                     | 20952                     | No                                 |
| C163A               | TSYQVYSK          | Yes               | 488.24                 | 624.3                 | 7.96                        | 64                       | 24                  | 103422                          | 4839                      | 5961                      | No                                 |
| C163A               | TSYQVYSK          | Yes               | 488.24                 | 787.4                 | 7.96                        | 64                       | 21                  | 284944                          | 13388                     | 16732                     | No                                 |
| C163A               | TSYQVYSK          | Yes               | 488.24                 | 874.4                 | 7.96                        | 64                       | 24                  | 74208                           | 3359                      | 5586                      | No                                 |
| C4BPA               | EDVYVVGTVLR       | No                |                        |                       |                             |                          |                     |                                 |                           |                           |                                    |
| C4BPA               | GYILVGQAK         | Yes               | 474.78                 | 403.2                 | 11.99                       | 62.2                     | 23.4                | 275966                          | ND                        | ND                        | No                                 |
| C4BPA               | GYILVGQAK         | Yes               | 474.78                 | 502.3                 | 11.99                       | 62.2                     | 23.4                | 315211                          | ND                        | ND                        | No                                 |

**Table S5.** MRM assay of individual proteins.

| Protein<br>(_HUMAN) | Peptide                      | MS/MS<br>spectrum | Precursor ion<br>(m/z) | Fragment ion<br>(m/z) | Retention time<br>(minutes) | Decustering<br>potential | Collision<br>energy | Area of<br>synthetic<br>peptide | Area in control<br>sample | Area in disease<br>sample | Interference |
|---------------------|------------------------------|-------------------|------------------------|-----------------------|-----------------------------|--------------------------|---------------------|---------------------------------|---------------------------|---------------------------|--------------|
| C4BPA               | GYILVGQAK                    | Yes               | 474.78                 | 615.4                 | 11.99                       | 62.2                     | 23.4                | 376472                          | ND                        | ND                        | No           |
| C4BPA               | GYILVGQAK                    | Yes               | 474.78                 | 728.5                 | 11.99                       | 62.2                     | 23.4                | 92533                           | ND                        | ND                        | No           |
| C4BPA               | IAHGHYK                      | Yes               | 413.22                 | 504.3                 | 5.29                        | 54.3                     | 26.7                | 32289                           | ND                        | ND                        | No           |
| C4BPA               | IAHGHYK                      | Yes               | 413.22                 | 516.3                 | 5.29                        | 54.3                     | 23.7                | 9545                            | ND                        | ND                        | No           |
| C4BPA               | IAHGHYK                      | Yes               | 413.22                 | 641.3                 | 5.29                        | 54.3                     | 23.7                | 29837                           | ND                        | ND                        | No           |
| C4BPA               | IAHGHYK                      | Yes               | 413.22                 | 712.4                 | 5.29                        | 54.3                     | 23.7                | 15452                           | ND                        | ND                        | No           |
| C4BPA               | LSLEIEQLELQR                 | Yes               | 490.94                 | 416.3                 | 19.19                       | 64.3                     | 19.6                | 6999                            | ND                        | ND                        | No           |
| C4BPA               | LSLEIEQLELQR                 | Yes               | 490.94                 | 443.3                 | 19.19                       | 64.3                     | 25.6                | 4951                            | ND                        | ND                        | No           |
| C4BPA               | LSLEIEQLELQR                 | Yes               | 490.94                 | 545.3                 | 19.19                       | 64.3                     | 19.6                | 10489                           | ND                        | ND                        | No           |
| C4BPA               | LSLEIEQLELQR                 | Yes               | 490.94                 | 658.4                 | 19.19                       | 64.3                     | 31.6                | 3613                            | ND                        | ND                        | No           |
| C4BPA               | TWYPEVPK                     | Yes               | 340.51                 | 288.1                 | 14.29                       | 44.9                     | 20.9                | 1184                            | ND                        | ND                        | No           |
| C4BPA               | TWYPEVPK                     | Yes               | 340.51                 | 451.2                 | 14.29                       | 44.9                     | 17.9                | ND                              | ND                        | ND                        | No           |
| C4BPA               | TWYPEVPK                     | Yes               | 340.51                 | 569.3                 | 14.29                       | 44.9                     | 20.9                | ND                              | ND                        | ND                        | No           |
| C4BPA               | TWYPEVPK                     | Yes               | 340.51                 | 677.3                 | 14.29                       | 44.9                     | 23.9                | ND                              | ND                        | ND                        | No           |
| CAH9                | FPAEIHVVHLSTAFAR             | Yes               | 598.99                 | 565.3                 | 16.95                       | 78.3                     | 31.1                | 8639                            | ND                        | ND                        | No           |
| CAH9                | FPAEIHVVHLSTAFAR             | Yes               | 598.99                 | 652.3                 | 16.95                       | 78.3                     | 37.1                | 20013                           | ND                        | ND                        | No           |
| CAH9                | FPAEIHVVHLSTAFAR             | Yes               | 598.99                 | 765.4                 | 16.95                       | 78.3                     | 37.1                | 14317                           | ND                        | ND                        | No           |
| CAH9                | FPAEIHVVHLSTAFAR             | Yes               | 598.99                 | 902.5                 | 16.95                       | 78.3                     | 37.1                | 10838                           | ND                        | ND                        | No           |
| CAH9                | GGVSYRPAEVAETGA              | No                |                        |                       |                             |                          |                     |                                 |                           |                           |              |
| CAH9                | LEEIAEEGSETQVPGLDISALLPSDFSR | Yes               | 1001.5                 | 409.2                 | 24.37                       | 130.2                    | 57.6                | 5094                            | ND                        | ND                        | No           |
| CAH9                | LEEIAEEGSETQVPGLDISALLPSDFSR | Yes               | 1001.5                 | 708.3                 | 24.37                       | 130.2                    | 45.6                | 11601                           | ND                        | ND                        | No           |
| CAH9                | LEEIAEEGSETQVPGLDISALLPSDFSR | Yes               | 1001.5                 | 821.4                 | 24.37                       | 130.2                    | 48.6                | 5113                            | ND                        | ND                        | No           |
| CAH9                | LEEIAEEGSETQVPGLDISALLPSDFSR | Yes               | 1001.5                 | 934.5                 | 24.37                       | 130.2                    | 48.6                | 3497                            | ND                        | ND                        | No           |

**Table S5.** MRM assay of individual proteins.

| Protein<br>(_HUMAN) | Peptide               | MS/MS<br>spectrum | Precursor ion<br>(m/z) | Fragment ion<br>(m/z) | Retention time<br>(minutes) | Declustering<br>potential | Collision<br>energy | Area of<br>synthetic<br>peptide | Area in control<br>sample | Area in disease<br>sample | Interference                           |
|---------------------|-----------------------|-------------------|------------------------|-----------------------|-----------------------------|---------------------------|---------------------|---------------------------------|---------------------------|---------------------------|----------------------------------------|
| CAH9                | VIEASFPAGVDSSPR       | Yes               | 511.26                 | 446.2                 | 13.71                       | 67                        | 23.6                | 33060                           | ND                        | ND                        | No                                     |
| CAH9                | VIEASFPAGVDSSPR       | Yes               | 511.26                 | 561.3                 | 13.71                       | 67                        | 23.6                | 80788                           | ND                        | ND                        | No                                     |
| CAH9                | VIEASFPAGVDSSPR       | Yes               | 511.26                 | 717.4                 | 13.71                       | 67                        | 26.6                | 23819                           | ND                        | ND                        | No                                     |
| CAH9                | VIEASFPAGVDSSPR       | Yes               | 511.26                 | 885.4                 | 13.71                       | 67                        | 32.6                | 10197                           | ND                        | ND                        | No                                     |
| CAH9                | YGGDPPWPR             | Yes               | 522.75                 | 393.1                 | 12.41                       | 68.4                      | 22.5                | 59158                           | ND                        | ND                        | No                                     |
| CAH9                | YGGDPPWPR             | Yes               | 522.75                 | 555.3                 | 12.41                       | 68.4                      | 34.5                | 22777                           | ND                        | ND                        | No                                     |
| CAH9                | YGGDPPWPR             | Yes               | 522.75                 | 652.4                 | 12.41                       | 68.4                      | 31.5                | 65075                           | ND                        | ND                        | No                                     |
| CAH9                | YGGDPPWPR             | Yes               | 522.75                 | 881.4                 | 12.41                       | 68.4                      | 25.5                | 5620                            | ND                        | ND                        | No                                     |
| CALR                | DDEFTHLYTLIVRPDNTYEVK | No                |                        |                       |                             |                           |                     |                                 |                           |                           |                                        |
| CALR                | DPDASKPEDWDER         | Yes               | 520.56                 | 304.2                 | 9.51                        | 68.2                      | 30.1                | 50454                           | ND                        | ND                        | No                                     |
| CALR                | DPDASKPEDWDER         | Yes               | 520.56                 | 328.1                 | 9.51                        | 68.2                      | 24.1                | 18158                           | ND                        | ND                        | No                                     |
| CALR                | DPDASKPEDWDER         | Yes               | 520.56                 | 720.3                 | 9.51                        | 68.2                      | 33.1                | 5607                            | ND                        | ND                        | No                                     |
| CALR                | DPDASKPEDWDER         | Yes               | 520.56                 | 946.4                 | 9.51                        | 68.2                      | 30.1                | 17472                           | ND                        | ND                        | No                                     |
| CALR                | FYGDEEK               | Yes               | 444.19                 | 276.2                 | 7.52                        | 58.3                      | 31                  | 83392                           | ND                        | ND                        | No                                     |
| CALR                | FYGDEEK               | Yes               | 444.19                 | 405.2                 | 7.52                        | 58.3                      | 28                  | 40000                           | 5042                      | 3667                      | Yes (Based on<br>Transition<br>Ratios) |
| CALR                | FYGDEEK               | Yes               | 444.19                 | 577.2                 | 7.52                        | 58.3                      | 22                  | 405161                          | 10816                     | 11944                     | Yes (Based on<br>Transition<br>Ratios) |
| CALR                | FYGDEEK               | Yes               | 444.19                 | 740.3                 | 7.52                        | 58.3                      | 22                  | 121217                          | ND                        | ND                        | No                                     |
| CALR                | GLQTSQDAR             | No                |                        |                       |                             |                           |                     |                                 |                           |                           |                                        |
| CALR                | GQTLVVQFTVK           | No                |                        |                       |                             |                           |                     |                                 |                           |                           |                                        |
| CALU                | DWILPSDYDHAEAEAR      | No                |                        |                       |                             |                           |                     |                                 |                           |                           |                                        |

**Table S5.** MRM assay of individual proteins.

| Protein<br>(_HUMAN) | Peptide                | MS/MS<br>spectrum | Precursor ion<br>(m/z) | Fragment ion<br>(m/z) | Retention time<br>(minutes) | Declustering<br>potential | Collision<br>energy | Area of<br>synthetic<br>peptide | Area in control<br>sample | Area in disease<br>sample | Interference |
|---------------------|------------------------|-------------------|------------------------|-----------------------|-----------------------------|---------------------------|---------------------|---------------------------------|---------------------------|---------------------------|--------------|
| CALU                | EQFVEFR                | Yes               | 477.74                 | 322.2                 | 13.76                       | 62.6                      | 32.5                | 66982                           | ND                        | ND                        | No           |
| CALU                | EQFVEFR                | Yes               | 477.74                 | 451.2                 | 13.76                       | 62.6                      | 23.5                | 64272                           | ND                        | ND                        | No           |
| CALU                | EQFVEFR                | Yes               | 477.74                 | 550.3                 | 13.76                       | 62.6                      | 23.5                | 30534                           | ND                        | ND                        | No           |
| CALU                | EQFVEFR                | Yes               | 477.74                 | 697.4                 | 13.76                       | 62.6                      | 23.5                | 39899                           | ND                        | ND                        | No           |
| CALU                | GHDLNEDGLVSWEEYK       | Yes               | 945.93                 | 423.2                 | 16.50                       | 123                       | 47.1                | 3128                            | ND                        | ND                        | No           |
| CALU                | GHDLNEDGLVSWEEYK       | Yes               | 945.93                 | 568.3                 | 16.50                       | 123                       | 50.1                | 2709                            | ND                        | ND                        | No           |
| CALU                | GHDLNEDGLVSWEEYK       | Yes               | 945.93                 | 666.3                 | 16.50                       | 123                       | 50.1                | 1323                            | ND                        | ND                        | No           |
| CALU                | GHDLNEDGLVSWEEYK       | Yes               | 945.93                 | 841.4                 | 16.50                       | 123                       | 53.1                | 5599                            | ND                        | ND                        | No           |
| CALU                | TFDQLTPEESK            | Yes               | 647.81                 | 364.2                 | 11.25                       | 84.6                      | 31                  | 141796                          | ND                        | ND                        | No           |
| CALU                | TFDQLTPEESK            | Yes               | 647.81                 | 589.3                 | 11.25                       | 84.6                      | 40                  | 264251                          | ND                        | ND                        | No           |
| CALU                | TFDQLTPEESK            | Yes               | 647.81                 | 690.3                 | 11.25                       | 84.6                      | 31                  | 129105                          | ND                        | ND                        | No           |
| CALU                | TFDQLTPEESK            | Yes               | 647.81                 | 931.5                 | 11.25                       | 84.6                      | 28                  | 14458                           | ND                        | ND                        | No           |
| CALU                | VHNDASFDYDHDFAFLGAEAAK | No                |                        |                       |                             |                           |                     |                                 |                           |                           |              |
| CALX                | AEDEILNR               | Yes               | 544.76                 | 402.2                 | 10.34                       | 71.3                      | 26.5                | 36469                           | ND                        | ND                        | No           |
| CALX                | AEDEILNR               | Yes               | 544.76                 | 515.3                 | 10.34                       | 71.3                      | 35.5                | 12681                           | ND                        | ND                        | No           |
| CALX                | AEDEILNR               | Yes               | 544.76                 | 759.4                 | 10.34                       | 71.3                      | 35.5                | 12934                           | ND                        | ND                        | No           |
| CALX                | AEDEILNR               | Yes               | 544.76                 | 888.4                 | 10.34                       | 71.3                      | 26.5                | 14638                           | ND                        | ND                        | No           |
| CALX                | APVPTGEVYFADSFDR       | Yes               | 590.95                 | 524.2                 | 18.33                       | 77.2                      | 30.7                | 26819                           | ND                        | ND                        | No           |
| CALX                | APVPTGEVYFADSFDR       | Yes               | 590.95                 | 639.3                 | 18.33                       | 77.2                      | 27.7                | 30572                           | ND                        | ND                        | No           |
| CALX                | APVPTGEVYFADSFDR       | Yes               | 590.95                 | 710.3                 | 18.33                       | 77.2                      | 27.7                | 33171                           | ND                        | ND                        | No           |
| CALX                | APVPTGEVYFADSFDR       | Yes               | 590.95                 | 751.4                 | 18.33                       | 77.2                      | 27.7                | 19688                           | ND                        | ND                        | No           |
| CALX                | GTLSGWILSK             | Yes               | 531.3                  | 347.2                 | 18.64                       | 69.5                      | 31.9                | 131575                          | 5536                      | 9531                      | No           |
| CALX                | GTLSGWILSK             | Yes               | 531.3                  | 703.4                 | 18.64                       | 69.5                      | 25.9                | 99393                           | 5188                      | 3643                      | No           |

**Table S5.** MRM assay of individual proteins.

| Protein<br>(_HUMAN) | Peptide                   | MS/MS<br>spectrum | Precursor ion<br>(m/z) | Fragment ion<br>(m/z) | Retention time<br>(minutes) | Declustering<br>potential | Collision<br>energy | Area of<br>synthetic<br>peptide | Area in control<br>sample | Area in disease<br>sample | Interference                           |
|---------------------|---------------------------|-------------------|------------------------|-----------------------|-----------------------------|---------------------------|---------------------|---------------------------------|---------------------------|---------------------------|----------------------------------------|
| CALX                | GTLSGWILSK                | Yes               | 531.3                  | 790.4                 | 18.64                       | 69.5                      | 25.9                | 193462                          | 8175                      | 8902                      | No                                     |
| CALX                | GTLSGWILSK                | Yes               | 531.3                  | 903.5                 | 18.64                       | 69.5                      | 25.9                | 39342                           | ND                        | ND                        | No                                     |
| CALX                | IPDPEAVKPDDWDEDAPAK       | Yes               | 703.33                 | 315.2                 | 13.98                       | 91.7                      | 42.4                | 217605                          | ND                        | ND                        | No                                     |
| CALX                | IPDPEAVKPDDWDEDAPAK       | Yes               | 703.33                 | 326.2                 | 13.98                       | 91.7                      | 33.4                | 134150                          | ND                        | ND                        | No                                     |
| CALX                | IPDPEAVKPDDWDEDAPAK       | Yes               | 703.33                 | 386.2                 | 13.98                       | 91.7                      | 39.4                | 152743                          | ND                        | ND                        | No                                     |
| CALX                | IPDPEAVKPDDWDEDAPAK       | Yes               | 703.33                 | 931.4                 | 13.98                       | 91.7                      | 42.4                | 14743                           | ND                        | ND                        | No                                     |
| CALX                | TGIYEK                    | Yes               | 420.21                 | 276.2                 | 7.40                        | 55.2                      | 27                  | 292573                          | 11388                     | 11011                     | Yes (Based on<br>Transition<br>Ratios) |
| CALX                | TGIYEK                    | Yes               | 420.21                 | 568.3                 | 7.40                        | 55.2                      | 21                  | 462933                          | 2301                      | 4334                      | No                                     |
| CALX                | TGIYEK                    | Yes               | 420.21                 | 681.3                 | 7.40                        | 55.2                      | 21                  | 148154                          | 1651                      | ND                        | No                                     |
| CALX                | TGIYEK                    | Yes               | 420.21                 | 738.4                 | 7.40                        | 55.2                      | 21                  | 155145                          | 836                       | 1825                      | No                                     |
| CAP7                | DWIDGVLNNPGPGA            | Yes               | 761.37                 | 302.1                 | 19.95                       | 99.2                      | 42                  | 21756                           | ND                        | ND                        | No                                     |
| CAP7                | DWIDGVLNNPGPGA            | Yes               | 761.37                 | 341.2                 | 19.95                       | 99.2                      | 45                  | 26377                           | ND                        | ND                        | No                                     |
| CAP7                | DWIDGVLNNPGPGA            | Yes               | 761.37                 | 495.3                 | 19.95                       | 99.2                      | 39                  | 47196                           | ND                        | ND                        | No                                     |
| CAP7                | DWIDGVLNNPGPGA            | Yes               | 761.37                 | 686.3                 | 19.95                       | 99.2                      | 33                  | 14015                           | ND                        | ND                        | No                                     |
| CAP7                | EANLTSSVTILPLPLQNATVEAGTR | No                |                        |                       |                             |                           |                     |                                 |                           |                           |                                        |
| CAP7                | GPDFFTR                   | No                |                        |                       |                             |                           |                     |                                 |                           |                           |                                        |
| CAP7                | LTVLALLAGLLASSR           | No                |                        |                       |                             |                           |                     |                                 |                           |                           |                                        |
| CAP7                | QFPFLASIQNQGR             | Yes               | 753.4                  | 276.1                 | 20.48                       | 98.2                      | 38.6                | 27250                           | ND                        | ND                        | No                                     |
| CAP7                | QFPFLASIQNQGR             | Yes               | 753.4                  | 633.3                 | 20.48                       | 98.2                      | 32.6                | 3032                            | ND                        | ND                        | No                                     |
| CAP7                | QFPFLASIQNQGR             | Yes               | 753.4                  | 802.4                 | 20.48                       | 98.2                      | 35.6                | 21997                           | ND                        | ND                        | No                                     |
| CAP7                | QFPFLASIQNQGR             | Yes               | 753.4                  | 873.5                 | 20.48                       | 98.2                      | 44.6                | 24685                           | ND                        | ND                        | No                                     |
| CATB                | HYGYSYSVSNSEK             | Yes               | 545.57                 | 301.1                 | 8.74                        | 71.4                      | 31.4                | 14645                           | ND                        | ND                        | No                                     |

**Table S5.** MRM assay of individual proteins.

| Protein<br>(_HUMAN) | Peptide                       | MS/MS<br>spectrum | Precursor ion<br>(m/z) | Fragment ion<br>(m/z) | Retention time<br>(minutes) | Declustering<br>potential | Collision<br>energy | Area of<br>synthetic<br>peptide | Area in control<br>sample | Area in disease<br>sample | Interference |
|---------------------|-------------------------------|-------------------|------------------------|-----------------------|-----------------------------|---------------------------|---------------------|---------------------------------|---------------------------|---------------------------|--------------|
| CATB                | HYGNSYSVSNSEK                 | Yes               | 545.57                 | 635.3                 | 8.74                        | 71.4                      | 28.4                | 6159                            | ND                        | ND                        | No           |
| CATB                | HYGNSYSVSNSEK                 | Yes               | 545.57                 | 722.3                 | 8.74                        | 71.4                      | 25.4                | 11762                           | ND                        | ND                        | No           |
| CATB                | HYGNSYSVSNSEK                 | Yes               | 545.57                 | 750.4                 | 8.74                        | 71.4                      | 25.4                | 22210                           | ND                        | ND                        | No           |
| CATB                | ILGWGVENGTPYWLVANSWNTDWDNGFFK | No                |                        |                       |                             |                           |                     |                                 |                           |                           |              |
| CATB                | LPASFDAR                      | Yes               | 438.73                 | 508.3                 | 10.66                       | 57.6                      | 21.8                | 12873                           | ND                        | ND                        | No           |
| CATB                | LPASFDAR                      | Yes               | 438.73                 | 595.3                 | 10.66                       | 57.6                      | 24.8                | 80849                           | 4844                      | 5829                      | No           |
| CATB                | LPASFDAR                      | Yes               | 438.73                 | 666.3                 | 10.66                       | 57.6                      | 24.8                | 85179                           | 4845                      | 4353                      | No           |
| CATB                | LPASFDAR                      | Yes               | 438.73                 | 763.4                 | 10.66                       | 57.6                      | 21.8                | 37955                           | 2920                      | 908                       | No           |
| CATB                | NGPVEGAFSVYSDFLLYK            | No                |                        |                       |                             |                           |                     |                                 |                           |                           |              |
| CATB                | TDQYWEK                       | Yes               | 485.22                 | 462.2                 | 9.35                        | 63.6                      | 32.8                | 58137                           | ND                        | ND                        | No           |
| CATB                | TDQYWEK                       | Yes               | 485.22                 | 625.3                 | 9.35                        | 63.6                      | 23.8                | 38336                           | ND                        | ND                        | No           |
| CATB                | TDQYWEK                       | Yes               | 485.22                 | 753.4                 | 9.35                        | 63.6                      | 23.8                | 52981                           | ND                        | ND                        | No           |
| CATB                | TDQYWEK                       | Yes               | 485.22                 | 868.4                 | 9.35                        | 63.6                      | 23.8                | 23189                           | ND                        | ND                        | No           |
| CATG                | HPQYNQR                       | Yes               | 471.73                 | 417.2                 | 5.36                        | 61.9                      | 20.3                | 1132                            | ND                        | ND                        | No           |
| CATG                | HPQYNQR                       | Yes               | 471.73                 | 580.3                 | 5.36                        | 61.9                      | 26.3                | 1268                            | ND                        | ND                        | No           |
| CATG                | HPQYNQR                       | Yes               | 471.73                 | 708.3                 | 5.36                        | 61.9                      | 26.3                | 1430                            | ND                        | ND                        | No           |
| CATG                | HPQYNQR                       | Yes               | 471.73                 | 805.4                 | 5.36                        | 61.9                      | 29.3                | 3909                            | ND                        | ND                        | No           |
| CATG                | NVNPVALPR                     | Yes               | 490.29                 | 385.3                 | 11.68                       | 64.2                      | 24.1                | 19036                           | ND                        | ND                        | No           |
| CATG                | NVNPVALPR                     | Yes               | 490.29                 | 456.3                 | 11.68                       | 64.2                      | 33.1                | 91377                           | ND                        | ND                        | No           |
| CATG                | NVNPVALPR                     | Yes               | 490.29                 | 652.4                 | 11.68                       | 64.2                      | 24.1                | 78887                           | ND                        | ND                        | No           |
| CATG                | NVNPVALPR                     | Yes               | 490.29                 | 766.5                 | 11.68                       | 64.2                      | 24.1                | 98931                           | ND                        | ND                        | No           |
| CATG                | SSGVPPEVFTR                   | Yes               | 588.31                 | 331.2                 | 12.20                       | 76.9                      | 25.4                | 69543                           | ND                        | ND                        | No           |
| CATG                | SSGVPPEVFTR                   | Yes               | 588.31                 | 423.2                 | 12.20                       | 76.9                      | 28.4                | 97461                           | ND                        | ND                        | No           |

**Table S5.** MRM assay of individual proteins.

| Protein<br>(_HUMAN) | Peptide                  | MS/MS<br>spectrum | Precursor ion<br>(m/z) | Fragment ion<br>(m/z) | Retention time<br>(minutes) | Decustering<br>potential | Collision<br>energy | Area of<br>synthetic<br>peptide | Area in control<br>sample | Area in disease<br>sample | Interference |
|---------------------|--------------------------|-------------------|------------------------|-----------------------|-----------------------------|--------------------------|---------------------|---------------------------------|---------------------------|---------------------------|--------------|
| CATG                | SSGVPPEVFTR              | Yes               | 588.31                 | 748.4                 | 12.20                       | 76.9                     | 37.4                | 12061                           | ND                        | ND                        | No           |
| CATG                | SSGVPPEVFTR              | Yes               | 588.31                 | 845.5                 | 12.20                       | 76.9                     | 28.4                | 45332                           | ND                        | ND                        | No           |
| CATG                | VSSFLPWIR                | Yes               | 552.81                 | 474.3                 | 22.78                       | 72.3                     | 32.8                | 6965                            | ND                        | ND                        | No           |
| CATG                | VSSFLPWIR                | Yes               | 552.81                 | 684.4                 | 22.78                       | 72.3                     | 26.8                | 24577                           | ND                        | ND                        | No           |
| CATG                | VSSFLPWIR                | Yes               | 552.81                 | 831.5                 | 22.78                       | 72.3                     | 26.8                | 16656                           | ND                        | ND                        | No           |
| CATG                | VSSFLPWIR                | Yes               | 552.81                 | 918.5                 | 22.78                       | 72.3                     | 23.8                | 27914                           | ND                        | ND                        | No           |
| CBPB2               | ASASYEQYHSLNEIYSWIEFITER | Yes               | 1033.82                | 405.2                 | 25.22                       | 134.4                    | 56.3                | 8520                            | 26423                     | 16502                     | No           |
| CBPB2               | ASASYEQYHSLNEIYSWIEFITER | Yes               | 1033.82                | 665.4                 | 25.22                       | 134.4                    | 50.3                | 10394                           | 13390                     | 14641                     | No           |
| CBPB2               | ASASYEQYHSLNEIYSWIEFITER | Yes               | 1033.82                | 794.4                 | 25.22                       | 134.4                    | 53.3                | 18007                           | 23751                     | 14760                     | No           |
| CBPB2               | ASASYEQYHSLNEIYSWIEFITER | Yes               | 1033.82                | 907.5                 | 25.22                       | 134.4                    | 47.3                | 9883                            | 11687                     | 13892                     | No           |
| CBPB2               | AYISMHSYSQHIVFPYSYTR     | Yes               | 817.39                 | 689.3                 | 18.96                       | 106.4                    | 36.2                | 3675                            | 13098                     | 13695                     | No           |
| CBPB2               | AYISMHSYSQHIVFPYSYTR     | Yes               | 817.39                 | 703.3                 | 18.96                       | 106.4                    | 42.2                | 10467                           | 33972                     | 25052                     | No           |
| CBPB2               | AYISMHSYSQHIVFPYSYTR     | Yes               | 817.39                 | 786.4                 | 18.96                       | 106.4                    | 45.2                | 64467                           | 289608                    | 250220                    | No           |
| CBPB2               | AYISMHSYSQHIVFPYSYTR     | Yes               | 817.39                 | 933.4                 | 18.96                       | 106.4                    | 48.2                | 32682                           | 144446                    | 95679                     | No           |
| CBPB2               | DHEELSLVASEAVR           | Yes               | 777.89                 | 253.1                 | 16.01                       | 101.3                    | 45.7                | 187337                          | 47739                     | 69282                     | No           |
| CBPB2               | DHEELSLVASEAVR           | Yes               | 777.89                 | 382.1                 | 16.01                       | 101.3                    | 42.7                | 78040                           | 21357                     | 23997                     | No           |
| CBPB2               | DHEELSLVASEAVR           | Yes               | 777.89                 | 511.2                 | 16.01                       | 101.3                    | 39.7                | 64477                           | 17226                     | 19272                     | No           |
| CBPB2               | DHEELSLVASEAVR           | Yes               | 777.89                 | 931.5                 | 16.01                       | 101.3                    | 42.7                | 48749                           | 7212                      | 11690                     | No           |
| CBPB2               | DTGTYGFLLPER             | Yes               | 684.84                 | 401.2                 | 19.81                       | 89.3                     | 29.6                | 3049030                         | 1475914                   | 1786415                   | No           |
| CBPB2               | DTGTYGFLLPER             | Yes               | 684.84                 | 627.4                 | 19.81                       | 89.3                     | 32.6                | 744094                          | 396643                    | 435417                    | No           |
| CBPB2               | DTGTYGFLLPER             | Yes               | 684.84                 | 831.5                 | 19.81                       | 89.3                     | 32.6                | 1469213                         | 776450                    | 922854                    | No           |
| CBPB2               | DTGTYGFLLPER             | Yes               | 684.84                 | 994.5                 | 19.81                       | 89.3                     | 32.6                | 539383                          | 239942                    | 277008                    | No           |
| CBPB2               | EAFAAVSK                 | Yes               | 411.72                 | 333.2                 | 10.10                       | 54.1                     | 20.6                | 1090016                         | 785735                    | 643444                    | No           |

**Table S5.** MRM assay of individual proteins.

| Protein<br>(_HUMAN) | Peptide                    | MS/MS<br>spectrum | Precursor ion<br>(m/z) | Fragment ion<br>(m/z) | Retention time<br>(minutes) | Declustering<br>potential | Collision<br>energy | Area of<br>synthetic<br>peptide | Area in control<br>sample | Area in disease<br>sample | Interference |
|---------------------|----------------------------|-------------------|------------------------|-----------------------|-----------------------------|---------------------------|---------------------|---------------------------------|---------------------------|---------------------------|--------------|
| CBPB2               | EAFAAVSK                   | Yes               | 411.72                 | 475.3                 | 10.10                       | 54.1                      | 23.6                | 1363434                         | 1264100                   | 1084422                   | No           |
| CBPB2               | EAFAAVSK                   | Yes               | 411.72                 | 622.4                 | 10.10                       | 54.1                      | 20.6                | 742094                          | 713478                    | 626234                    | No           |
| CBPB2               | EAFAAVSK                   | Yes               | 411.72                 | 693.4                 | 10.10                       | 54.1                      | 23.6                | 61111                           | 61419                     | 52119                     | No           |
| CBPB2               | IHIGSSFEEK                 | Yes               | 339.85                 | 251.2                 | 12.24                       | 44.8                      | 23.9                | 785124                          | 100918                    | 141450                    | No           |
| CBPB2               | IHIGSSFEEK                 | Yes               | 339.85                 | 421.3                 | 12.24                       | 44.8                      | 20.9                | 181595                          | 22730                     | 29656                     | No           |
| CBPB2               | IHIGSSFEEK                 | Yes               | 339.85                 | 423.2                 | 12.24                       | 44.8                      | 14.9                | 615216                          | 83638                     | 138320                    | No           |
| CBPB2               | IHIGSSFEEK                 | Yes               | 339.85                 | 510.3                 | 12.24                       | 44.8                      | 14.9                | 295811                          | 36748                     | 51757                     | No           |
| CBPB2               | LVDFYVMPVVNVGDYDYSWK       | No                |                        |                       |                             |                           |                     |                                 |                           |                           |              |
| CBPB2               | QVHFFVNASDVDNVK            | Yes               | 573.62                 | 659.3                 | 17.15                       | 75                        | 26.8                | 13389                           | ND                        | ND                        | No           |
| CBPB2               | QVHFFVNASDVDNVK            | Yes               | 573.62                 | 689.3                 | 17.15                       | 75                        | 23.8                | 78363                           | ND                        | ND                        | No           |
| CBPB2               | QVHFFVNASDVDNVK            | Yes               | 573.62                 | 776.4                 | 17.15                       | 75                        | 26.8                | 76368                           | ND                        | ND                        | No           |
| CBPB2               | QVHFFVNASDVDNVK            | Yes               | 573.62                 | 847.4                 | 17.15                       | 75                        | 29.8                | 22609                           | ND                        | ND                        | No           |
| CBPB2               | YPLYVLK                    | Yes               | 448.27                 | 522.3                 | 17.48                       | 58.8                      | 31.2                | 393410                          | 48162                     | 99701                     | No           |
| CBPB2               | YPLYVLK                    | Yes               | 448.27                 | 635.4                 | 17.48                       | 58.8                      | 22.2                | 567585                          | 78707                     | 150558                    | No           |
| CBPB2               | YPLYVLK                    | Yes               | 448.27                 | 636.3                 | 17.48                       | 58.8                      | 22.2                | 123713                          | 13549                     | 34360                     | No           |
| CBPB2               | YPLYVLK                    | Yes               | 448.27                 | 732.5                 | 17.48                       | 58.8                      | 22.2                | 1088839                         | 120547                    | 219721                    | No           |
| CBPB2               | YTHGHGSETLYLAPGGDDWIYDLGIK | No                |                        |                       |                             |                           |                     |                                 |                           |                           |              |
| CCL22               | No peptide                 |                   |                        |                       |                             |                           |                     |                                 |                           |                           |              |
| CD14                | AFPALTSLDLSDNPGLGER        | Yes               | 987                    | 500.3                 | 22.14                       | 128.3                     | 48.9                | 55070                           | 171904                    | 130555                    | No           |
| CD14                | AFPALTSLDLSDNPGLGER        | Yes               | 987                    | 628.3                 | 22.14                       | 128.3                     | 42.9                | 101483                          | 308186                    | 221877                    | No           |
| CD14                | AFPALTSLDLSDNPGLGER        | Yes               | 987                    | 742.4                 | 22.14                       | 128.3                     | 51.9                | 64027                           | 212728                    | 163731                    | No           |
| CD14                | AFPALTSLDLSDNPGLGER        | Yes               | 987                    | 944.4                 | 22.14                       | 128.3                     | 51.9                | 61136                           | 175453                    | 128926                    | No           |
| CD14                | ATVNPSAPR                  | Yes               | 456.75                 | 386.2                 | 7.30                        | 59.9                      | 22.6                | 1112667                         | 548678                    | 395588                    | No           |



**Table S5.** MRM assay of individual proteins.

| Protein<br>(_HUMAN) | Peptide             | MS/MS<br>spectrum | Precursor ion<br>(m/z) | Fragment ion<br>(m/z) | Retention time<br>(minutes) | Declustering<br>potential | Collision<br>energy | Area of<br>synthetic<br>peptide | Area in control<br>sample | Area in disease<br>sample | Interference |
|---------------------|---------------------|-------------------|------------------------|-----------------------|-----------------------------|---------------------------|---------------------|---------------------------------|---------------------------|---------------------------|--------------|
| CD14                | ATVNPSAPR           | Yes               | 456.75                 | 430.2                 | 7.30                        | 59.9                      | 31.6                | 471728                          | 257556                    | 171485                    | No           |
| CD14                | ATVNPSAPR           | Yes               | 456.75                 | 527.3                 | 7.30                        | 59.9                      | 25.6                | 3728867                         | 2008363                   | 1433545                   | No           |
| CD14                | ATVNPSAPR           | Yes               | 456.75                 | 740.4                 | 7.30                        | 59.9                      | 22.6                | 541278                          | 282188                    | 201515                    | No           |
| CD14                | ELTLEDLK            | Yes               | 480.77                 | 260.2                 | 17.35                       | 63                        | 32.7                | 3616963                         | ND                        | ND                        | No           |
| CD14                | ELTLEDLK            | Yes               | 480.77                 | 504.3                 | 17.35                       | 63                        | 23.7                | 4064128                         | ND                        | ND                        | No           |
| CD14                | ELTLEDLK            | Yes               | 480.77                 | 617.4                 | 17.35                       | 63                        | 23.7                | 2474104                         | ND                        | ND                        | No           |
| CD14                | ELTLEDLK            | Yes               | 480.77                 | 718.4                 | 17.35                       | 63                        | 23.7                | 2942134                         | ND                        | ND                        | No           |
| CD14                | FPAIQNLALR          | Yes               | 571.84                 | 714.4                 | 19.65                       | 74.8                      | 36.7                | 4587824                         | 51378                     | 41996                     | No           |
| CD14                | FPAIQNLALR          | Yes               | 571.84                 | 827.5                 | 19.65                       | 74.8                      | 36.7                | 3350648                         | 35713                     | 34047                     | No           |
| CD14                | FPAIQNLALR          | Yes               | 571.84                 | 898.5                 | 19.65                       | 74.8                      | 36.7                | 3574228                         | 31362                     | 33321                     | No           |
| CD14                | FPAIQNLALR          | Yes               | 571.84                 | 995.6                 | 19.65                       | 74.8                      | 36.7                | 532547                          | 5286                      | 5179                      | No           |
| CD14                | ITGTMPPLEATGLALSSLR | No                |                        |                       |                             |                           |                     |                                 |                           |                           |              |
| CD14                | LTVGAAQVPAQLLVGALR  | Yes               | 593.03                 | 416.3                 | 24.17                       | 77.5                      | 24.8                | 172705                          | 375000                    | 340842                    | No           |
| CD14                | LTVGAAQVPAQLLVGALR  | Yes               | 593.03                 | 515.3                 | 24.17                       | 77.5                      | 24.8                | 157643                          | 299445                    | 278333                    | No           |
| CD14                | LTVGAAQVPAQLLVGALR  | Yes               | 593.03                 | 628.4                 | 24.17                       | 77.5                      | 27.8                | 73655                           | 137055                    | 146301                    | No           |
| CD14                | LTVGAAQVPAQLLVGALR  | Yes               | 593.03                 | 740.4                 | 24.17                       | 77.5                      | 24.8                | 42884                           | 101973                    | 107306                    | No           |
| CD14                | NVSWATGR            | Yes               | 445.73                 | 301.2                 | 11.56                       | 58.5                      | 25.1                | 163450                          | ND                        | ND                        | No           |
| CD14                | NVSWATGR            | Yes               | 445.73                 | 404.2                 | 11.56                       | 58.5                      | 31.1                | 477894                          | ND                        | ND                        | No           |
| CD14                | NVSWATGR            | Yes               | 445.73                 | 590.3                 | 11.56                       | 58.5                      | 22.1                | 505147                          | ND                        | ND                        | No           |
| CD14                | NVSWATGR            | Yes               | 445.73                 | 677.3                 | 11.56                       | 58.5                      | 22.1                | 2117910                         | ND                        | ND                        | No           |
| CD14                | STLSVGVSGTLVLLQGAR  | Yes               | 879.51                 | 431.2                 | 23.07                       | 114.5                     | 38.2                | 3375                            | 22851                     | 17961                     | No           |
| CD14                | STLSVGVSGTLVLLQGAR  | Yes               | 879.51                 | 544.3                 | 23.07                       | 114.5                     | 50.2                | ND                              | 17545                     | 20433                     | No           |
| CD14                | STLSVGVSGTLVLLQGAR  | Yes               | 879.51                 | 657.4                 | 23.07                       | 114.5                     | 38.2                | ND                              | 39851                     | 27070                     | No           |

**Table S5.** MRM assay of individual proteins.

| Protein<br>(_HUMAN) | Peptide                 | MS/MS<br>spectrum | Precursor ion<br>(m/z) | Fragment ion<br>(m/z) | Retention time<br>(minutes) | Declustering<br>potential | Collision<br>energy | Area of<br>synthetic<br>peptide | Area in control<br>sample | Area in disease<br>sample | Interference |
|---------------------|-------------------------|-------------------|------------------------|-----------------------|-----------------------------|---------------------------|---------------------|---------------------------------|---------------------------|---------------------------|--------------|
| CD14                | STLSVGVSGTLVLLQGAR      | Yes               | 879.51                 | 970.6                 | 23.07                       | 114.5                     | 38.2                | ND                              | 6549                      | 5847                      | No           |
| CD14                | SWLAELQQWLKPLK          | Yes               | 599.67                 | 274.1                 | 25.16                       | 78.4                      | 25.1                | 1302125                         | 549305                    | 555118                    | No           |
| CD14                | SWLAELQQWLKPLK          | Yes               | 599.67                 | 414.3                 | 25.16                       | 78.4                      | 37.1                | 543676                          | 241156                    | 260259                    | No           |
| CD14                | SWLAELQQWLKPLK          | Yes               | 599.67                 | 542.4                 | 25.16                       | 78.4                      | 37.1                | 155425                          | 73405                     | 75307                     | No           |
| CD14                | SWLAELQQWLKPLK          | Yes               | 599.67                 | 841.5                 | 25.16                       | 78.4                      | 34.1                | 98179                           | 41988                     | 42402                     | No           |
| CD14                | VDADADPR                | Yes               | 429.7                  | 272.2                 | 6.41                        | 56.4                      | 30.4                | 631974                          | 137433                    | 107556                    | No           |
| CD14                | VDADADPR                | Yes               | 429.7                  | 573.3                 | 6.41                        | 56.4                      | 18.4                | 49328                           | 10484                     | 8138                      | No           |
| CD14                | VDADADPR                | Yes               | 429.7                  | 644.3                 | 6.41                        | 56.4                      | 21.4                | 127647                          | 35181                     | 28784                     | No           |
| CD14                | VDADADPR                | Yes               | 429.7                  | 759.3                 | 6.41                        | 56.4                      | 21.4                | 66276                           | 15580                     | 11308                     | No           |
| CD24                | AAGGALQSTASLFVVSLSLHLYS | No                |                        |                       |                             |                           |                     |                                 |                           |                           |              |
| CD2A2               | HSHPTR                  | Yes               | 367.69                 | 276.2                 | 5.61                        | 48.4                      | 24.7                | 63679                           | ND                        | ND                        | No           |
| CD2A2               | HSHPTR                  | Yes               | 367.69                 | 510.3                 | 5.61                        | 48.4                      | 15.7                | ND                              | ND                        | ND                        | No           |
| CD2A2               | HSHPTR                  | Yes               | 367.69                 | 597.3                 | 5.61                        | 48.4                      | 27.7                | 1612                            | ND                        | ND                        | No           |
| CD2A2               | VFVVHIPR                | Yes               | 483.8                  | 346.2                 | 16.60                       | 63.4                      | 32.8                | ND                              | ND                        | ND                        | No           |
| CD2A2               | VFVVHIPR                | Yes               | 483.8                  | 522.3                 | 16.60                       | 63.4                      | 20.8                | 21500                           | ND                        | ND                        | No           |
| CD2A2               | VFVVHIPR                | Yes               | 483.8                  | 621.4                 | 16.60                       | 63.4                      | 32.8                | ND                              | ND                        | ND                        | No           |
| CD2A2               | VFVVHIPR                | Yes               | 483.8                  | 720.5                 | 16.60                       | 63.4                      | 23.8                | 408532                          | ND                        | ND                        | No           |
| CD38                | DLAHQFTQVQR             | No                |                        |                       |                             |                           |                     |                                 |                           |                           |              |
| CD38                | ILLWSR                  | Yes               | 394.25                 | 262.2                 | 16.95                       | 51.9                      | 25.8                | 5588                            | ND                        | ND                        | No           |
| CD38                | ILLWSR                  | Yes               | 394.25                 | 448.2                 | 16.95                       | 51.9                      | 22.8                | 5665                            | ND                        | ND                        | No           |
| CD38                | ILLWSR                  | Yes               | 394.25                 | 561.3                 | 16.95                       | 51.9                      | 16.8                | 2603                            | ND                        | ND                        | No           |
| CD38                | ILLWSR                  | Yes               | 394.25                 | 674.4                 | 16.95                       | 51.9                      | 19.8                | 3106                            | ND                        | ND                        | No           |
| CD38                | NIYRPDK                 | Yes               | 453.25                 | 515.3                 | 6.41                        | 59.5                      | 31.4                | 33773                           | ND                        | ND                        | No           |

**Table S5.** MRM assay of individual proteins.

| Protein<br>(_HUMAN) | Peptide            | MS/MS<br>spectrum | Precursor ion<br>(m/z) | Fragment ion<br>(m/z) | Retention time<br>(minutes) | Declustering<br>potential | Collision<br>energy | Area of<br>synthetic<br>peptide | Area in control<br>sample | Area in disease<br>sample | Interference |
|---------------------|--------------------|-------------------|------------------------|-----------------------|-----------------------------|---------------------------|---------------------|---------------------------------|---------------------------|---------------------------|--------------|
| CD38                | NIYRPDK            | Yes               | 453.25                 | 678.4                 | 6.41                        | 59.5                      | 22.4                | 227558                          | ND                        | ND                        | No           |
| CD38                | NIYRPDK            | Yes               | 453.25                 | 759.4                 | 6.41                        | 59.5                      | 19.4                | 9379                            | ND                        | ND                        | No           |
| CD38                | NIYRPDK            | Yes               | 453.25                 | 791.4                 | 6.41                        | 59.5                      | 25.4                | 26256                           | ND                        | ND                        | No           |
| CD38                | NSTFGSVEVHNLQPEK   | Yes               | 595.96                 | 373.2                 | 12.80                       | 77.9                      | 33.9                | 75429                           | ND                        | ND                        | No           |
| CD38                | NSTFGSVEVHNLQPEK   | Yes               | 595.96                 | 728.4                 | 12.80                       | 77.9                      | 36.9                | 6613                            | ND                        | ND                        | No           |
| CD38                | NSTFGSVEVHNLQPEK   | Yes               | 595.96                 | 865.5                 | 12.80                       | 77.9                      | 36.9                | 8584                            | ND                        | ND                        | No           |
| CD38                | NSTFGSVEVHNLQPEK   | Yes               | 595.96                 | 964.5                 | 12.80                       | 77.9                      | 30.9                | 3017                            | ND                        | ND                        | No           |
| CD38                | VQTLEAWVIHGGR      | Yes               | 489.27                 | 426.2                 | 18.29                       | 64.1                      | 25.5                | 27811                           | ND                        | ND                        | No           |
| CD38                | VQTLEAWVIHGGR      | Yes               | 489.27                 | 539.3                 | 18.29                       | 64.1                      | 28.5                | 51574                           | ND                        | ND                        | No           |
| CD38                | VQTLEAWVIHGGR      | Yes               | 489.27                 | 638.4                 | 18.29                       | 64.1                      | 31.5                | 23690                           | ND                        | ND                        | No           |
| CD38                | VQTLEAWVIHGGR      | Yes               | 489.27                 | 824.5                 | 18.29                       | 64.1                      | 25.5                | 13652                           | ND                        | ND                        | No           |
| CD40L               | GDQNPQIAAHVISEASSK | Yes               | 617.98                 | 415.2                 | 12.81                       | 80.7                      | 26.1                | 16115                           | ND                        | ND                        | No           |
| CD40L               | GDQNPQIAAHVISEASSK | Yes               | 617.98                 | 721.4                 | 12.81                       | 80.7                      | 38.1                | 10259                           | ND                        | ND                        | No           |
| CD40L               | GDQNPQIAAHVISEASSK | Yes               | 617.98                 | 753.4                 | 12.81                       | 80.7                      | 26.1                | 1975                            | ND                        | ND                        | No           |
| CD40L               | GDQNPQIAAHVISEASSK | Yes               | 617.98                 | 957.5                 | 12.81                       | 80.7                      | 35.1                | 2831                            | ND                        | ND                        | No           |
| CD40L               | SQFEGFVK           | No                |                        |                       |                             |                           |                     |                                 |                           |                           |              |
| CD40L               | TTSVLQWAEK         | Yes               | 581.81                 | 533.3                 | 16.01                       | 76.1                      | 37.1                | 107088                          | ND                        | ND                        | No           |
| CD40L               | TTSVLQWAEK         | Yes               | 581.81                 | 774.4                 | 16.01                       | 76.1                      | 28.1                | 111057                          | ND                        | ND                        | No           |
| CD40L               | TTSVLQWAEK         | Yes               | 581.81                 | 873.5                 | 16.01                       | 76.1                      | 28.1                | 14338                           | ND                        | ND                        | No           |
| CD40L               | TTSVLQWAEK         | Yes               | 581.81                 | 960.5                 | 16.01                       | 76.1                      | 28.1                | 91329                           | ND                        | ND                        | No           |
| CD44                | FAGVFHVEK          | Yes               | 517.28                 | 815.4                 | 12.69                       | 67.7                      | 25.3                | 31240                           | 63087                     | 45891                     | No           |
| CD44                | FAGVFHVEK          | Yes               | 517.28                 | 886.5                 | 12.69                       | 67.7                      | 25.3                | 6968                            | 11483                     | 12501                     | No           |
| CD44                | FAGVFHVEK          | Yes               | 517.28                 | 887.4                 | 12.69                       | 67.7                      | 25.3                | 3390                            | 3671                      | 1563                      | No           |

**Table S5.** MRM assay of individual proteins.

| Protein<br>(_HUMAN) | Peptide                   | MS/MS<br>spectrum | Precursor ion<br>(m/z) | Fragment ion<br>(m/z) | Retention time<br>(minutes) | Decustering<br>potential | Collision<br>energy | Area of<br>synthetic<br>peptide | Area in control<br>sample | Area in disease<br>sample | Interference |
|---------------------|---------------------------|-------------------|------------------------|-----------------------|-----------------------------|--------------------------|---------------------|---------------------------------|---------------------------|---------------------------|--------------|
| CD44                | HLSFSGSGIDDDDFISSTISTTPR  | No                |                        |                       |                             |                          |                     |                                 |                           |                           |              |
| CD44                | KPSGLNGEASK               | Yes               | 544.29                 | 783.4                 | 5.59                        | 71.2                     | 35.4                | 5912                            | ND                        | ND                        | No           |
| CD44                | KPSGLNGEASK               | Yes               | 544.29                 | 854.4                 | 5.59                        | 71.2                     | 26.4                | 4186                            | ND                        | ND                        | No           |
| CD44                | KPSGLNGEASK               | Yes               | 544.29                 | 862.4                 | 5.59                        | 71.2                     | 29.4                | 18078                           | ND                        | ND                        | No           |
| CD44                | KPSGLNGEASK               | Yes               | 544.29                 | 959.5                 | 5.59                        | 71.2                     | 26.4                | 19867                           | ND                        | ND                        | No           |
| CD44                | TNPEDIYPSNPTDDDDVSSGSSSER | No                |                        |                       |                             |                          |                     |                                 |                           |                           |              |
| CD44                | YGFIEGHVVIPR              | Yes               | 462.92                 | 272.2                 | 16.06                       | 60.7                     | 30.2                | 163831                          | 515656                    | 485910                    | No           |
| CD44                | YGFIEGHVVIPR              | Yes               | 462.92                 | 484.3                 | 16.06                       | 60.7                     | 30.2                | 182263                          | 564470                    | 500258                    | No           |
| CD44                | YGFIEGHVVIPR              | Yes               | 462.92                 | 583.4                 | 16.06                       | 60.7                     | 21.2                | 90376                           | 357617                    | 319546                    | No           |
| CD44                | YGFIEGHVVIPR              | Yes               | 462.92                 | 777.5                 | 16.06                       | 60.7                     | 30.2                | 95958                           | 299807                    | 265247                    | No           |
| CD59                | AGLQVYNK                  | Yes               | 446.75                 | 424.2                 | 9.04                        | 58.6                     | 22.2                | 206079                          | 30067                     | 29658                     | No           |
| CD59                | AGLQVYNK                  | Yes               | 446.75                 | 523.3                 | 9.04                        | 58.6                     | 22.2                | 232038                          | 44188                     | 27540                     | No           |
| CD59                | AGLQVYNK                  | Yes               | 446.75                 | 651.3                 | 9.04                        | 58.6                     | 22.2                | 244798                          | 36203                     | 31423                     | No           |
| CD59                | AGLQVYNK                  | Yes               | 446.75                 | 821.5                 | 9.04                        | 58.6                     | 22.2                | 75752                           | 8496                      | 11084                     | No           |
| CD59                | TVLLLVTPLFLAAAWSLHP       | Yes               | 975.07                 | 314.2                 | 25.03                       | 126.8                    | 48.4                | 4179                            | ND                        | ND                        | No           |
| CD59                | TVLLLVTPLFLAAAWSLHP       | Yes               | 975.07                 | 427.3                 | 25.03                       | 126.8                    | 42.4                | 3264                            | ND                        | ND                        | No           |
| CD59                | TVLLLVTPLFLAAAWSLHP       | Yes               | 975.07                 | 540.4                 | 25.03                       | 126.8                    | 42.4                | 2755                            | ND                        | ND                        | No           |
| CD59                | TVLLLVTPLFLAAAWSLHP       | Yes               | 975.07                 | 740.5                 | 25.03                       | 126.8                    | 42.4                | 1569                            | ND                        | ND                        | No           |
| CD97                | ELNSPILFAFSHLESSDGEAGR    | No                |                        |                       |                             |                          |                     |                                 |                           |                           |              |
| CD97                | FIPEDPK                   | No                |                        |                       |                             |                          |                     |                                 |                           |                           |              |
| CD97                | TSSAEVTIQNVIK             | Yes               | 463.92                 | 347.2                 | 23.54                       | 60.8                     | 18.2                | ND                              | ND                        | ND                        | No           |
| CD97                | TSSAEVTIQNVIK             | Yes               | 463.92                 | 359.3                 | 23.54                       | 60.8                     | 18.2                | 28955                           | ND                        | ND                        | No           |
| CD97                | TSSAEVTIQNVIK             | Yes               | 463.92                 | 601.4                 | 23.54                       | 60.8                     | 21.2                | 10658                           | ND                        | ND                        | No           |

**Table S5.** MRM assay of individual proteins.

| Protein<br>(_HUMAN) | Peptide                 | MS/MS<br>spectrum | Precursor ion<br>(m/z) | Fragment ion<br>(m/z) | Retention time<br>(minutes) | Declustering<br>potential | Collision<br>energy | Area of<br>synthetic<br>peptide | Area in control<br>sample | Area in disease<br>sample | Interference |
|---------------------|-------------------------|-------------------|------------------------|-----------------------|-----------------------------|---------------------------|---------------------|---------------------------------|---------------------------|---------------------------|--------------|
| CD97                | TSSAEVTIQNVIK           | Yes               | 463.92                 | 714.5                 | 23.54                       | 60.8                      | 24.2                | 5221                            | ND                        | ND                        | No           |
| CD97                | VFQGQGLSTR              | Yes               | 546.79                 | 276.2                 | 9.40                        | 71.5                      | 32.6                | 16431                           | ND                        | ND                        | No           |
| CD97                | VFQGQGLSTR              | Yes               | 546.79                 | 661.4                 | 9.40                        | 71.5                      | 23.6                | 4073                            | ND                        | ND                        | No           |
| CD97                | VFQGQGLSTR              | Yes               | 546.79                 | 718.4                 | 9.40                        | 71.5                      | 35.6                | 31596                           | ND                        | ND                        | No           |
| CD97                | VFQGQGLSTR              | Yes               | 546.79                 | 846.4                 | 9.40                        | 71.5                      | 26.6                | 14960                           | ND                        | ND                        | No           |
| CD97                | YSEFTSTTSGTGHNQTR       | Yes               | 625.28                 | 518.3                 | 7.98                        | 81.7                      | 38.4                | 12379                           | ND                        | ND                        | No           |
| CD97                | YSEFTSTTSGTGHNQTR       | Yes               | 625.28                 | 712.3                 | 7.98                        | 81.7                      | 38.4                | 8352                            | ND                        | ND                        | No           |
| CD97                | YSEFTSTTSGTGHNQTR       | Yes               | 625.28                 | 813.4                 | 7.98                        | 81.7                      | 35.4                | 3544                            | ND                        | ND                        | No           |
| CD97                | YSEFTSTTSGTGHNQTR       | Yes               | 625.28                 | 957.5                 | 7.98                        | 81.7                      | 38.4                | 5899                            | ND                        | ND                        | No           |
| CDCP1               | EEGVFTVTPDTK            | Yes               | 661.83                 | 460.2                 | 12.81                       | 86.4                      | 40.6                | 600204                          | 44976                     | 30026                     | No           |
| CDCP1               | EEGVFTVTPDTK            | Yes               | 661.83                 | 561.3                 | 12.81                       | 86.4                      | 31.6                | 273282                          | ND                        | ND                        | No           |
| CDCP1               | EEGVFTVTPDTK            | Yes               | 661.83                 | 761.4                 | 12.81                       | 86.4                      | 31.6                | 320469                          | ND                        | ND                        | No           |
| CDCP1               | EEGVFTVTPDTK            | Yes               | 661.83                 | 908.5                 | 12.81                       | 86.4                      | 31.6                | 418538                          | ND                        | ND                        | No           |
| CDCP1               | IYVVDLSNER              | Yes               | 604.32                 | 376.2                 | 14.28                       | 79                        | 26.1                | 93152                           | ND                        | ND                        | No           |
| CDCP1               | IYVVDLSNER              | Yes               | 604.32                 | 733.3                 | 14.28                       | 79                        | 29.1                | 82512                           | ND                        | ND                        | No           |
| CDCP1               | IYVVDLSNER              | Yes               | 604.32                 | 832.4                 | 14.28                       | 79                        | 29.1                | 73990                           | ND                        | ND                        | No           |
| CDCP1               | IYVVDLSNER              | Yes               | 604.32                 | 931.5                 | 14.28                       | 79                        | 29.1                | 64818                           | ND                        | ND                        | No           |
| CDCP1               | LSLVLVPAQK              | Yes               | 534.35                 | 443.3                 | 16.84                       | 69.9                      | 32                  | 1373873                         | ND                        | ND                        | No           |
| CDCP1               | LSLVLVPAQK              | Yes               | 534.35                 | 655.4                 | 16.84                       | 69.9                      | 26                  | 391822                          | ND                        | ND                        | No           |
| CDCP1               | LSLVLVPAQK              | Yes               | 534.35                 | 754.5                 | 16.84                       | 69.9                      | 26                  | 253531                          | ND                        | ND                        | No           |
| CDCP1               | LSLVLVPAQK              | Yes               | 534.35                 | 867.6                 | 16.84                       | 69.9                      | 26                  | 67163                           | ND                        | ND                        | No           |
| CDCP1               | SPPESESEPYTFSHPNNGDVSSK | No                |                        |                       |                             |                           |                     |                                 |                           |                           |              |
| CDCP1               | VEYYIPGSTTNPEVFK        | Yes               | 922.46                 | 392.2                 | 16.63                       | 120                       | 49.1                | 155039                          | ND                        | ND                        | No           |

**Table S5.** MRM assay of individual proteins.

| Protein<br>(_HUMAN) | Peptide                | MS/MS<br>spectrum | Precursor ion<br>(m/z) | Fragment ion<br>(m/z) | Retention time<br>(minutes) | Declustering<br>potential | Collision<br>energy | Area of<br>synthetic<br>peptide | Area in control<br>sample | Area in disease<br>sample | Interference |
|---------------------|------------------------|-------------------|------------------------|-----------------------|-----------------------------|---------------------------|---------------------|---------------------------------|---------------------------|---------------------------|--------------|
| CDCP1               | VEYYIPGSTTNPEVFK       | Yes               | 922.46                 | 555.2                 | 16.63                       | 120                       | 40.1                | 93615                           | ND                        | ND                        | No           |
| CDCP1               | VEYYIPGSTTNPEVFK       | Yes               | 922.46                 | 619.3                 | 16.63                       | 120                       | 52.1                | 50922                           | ND                        | ND                        | No           |
| CDCP1               | VEYYIPGSTTNPEVFK       | Yes               | 922.46                 | 668.3                 | 16.63                       | 120                       | 40.1                | 67737                           | ND                        | ND                        | No           |
| CDK4                | APPPGLPAETIK           | Yes               | 397.56                 | 420.2                 | 12.00                       | 52.3                      | 14.8                | 62272                           | ND                        | ND                        | No           |
| CDK4                | APPPGLPAETIK           | Yes               | 397.56                 | 533.3                 | 12.00                       | 52.3                      | 17.8                | 47241                           | ND                        | ND                        | No           |
| CDK4                | APPPGLPAETIK           | Yes               | 397.56                 | 561.3                 | 12.00                       | 52.3                      | 20.8                | 19957                           | ND                        | ND                        | No           |
| CDK4                | APPPGLPAETIK           | Yes               | 397.56                 | 658.4                 | 12.00                       | 52.3                      | 17.8                | 34709                           | ND                        | ND                        | No           |
| CDK4                | DLKPENILVTSGGTVK       | No                |                        |                       |                             |                           |                     |                                 |                           |                           |              |
| CDK4                | IFDLIGLPPEDDWPR        | Yes               | 594.97                 | 458.3                 | 24.36                       | 77.8                      | 36.9                | 58289                           | ND                        | ND                        | No           |
| CDK4                | IFDLIGLPPEDDWPR        | Yes               | 594.97                 | 489.3                 | 24.36                       | 77.8                      | 27.9                | 12947                           | ND                        | ND                        | No           |
| CDK4                | IFDLIGLPPEDDWPR        | Yes               | 594.97                 | 659.4                 | 24.36                       | 77.8                      | 24.9                | 36596                           | ND                        | ND                        | No           |
| CDK4                | IFDLIGLPPEDDWPR        | Yes               | 594.97                 | 914.4                 | 24.36                       | 77.8                      | 24.9                | 41235                           | ND                        | ND                        | No           |
| CDK4                | VPNGGGGGGLPISTVR       | Yes               | 747.91                 | 462.3                 | 12.49                       | 97.5                      | 38.4                | 12038                           | ND                        | ND                        | No           |
| CDK4                | VPNGGGGGGLPISTVR       | Yes               | 747.91                 | 672.4                 | 12.49                       | 97.5                      | 38.4                | 31260                           | ND                        | ND                        | No           |
| CDK4                | VPNGGGGGGLPISTVR       | Yes               | 747.91                 | 899.5                 | 12.49                       | 97.5                      | 41.4                | 4321                            | ND                        | ND                        | No           |
| CDK4                | VPNGGGGGGLPISTVR       | Yes               | 747.91                 | 956.6                 | 12.49                       | 97.5                      | 44.4                | 7293                            | ND                        | ND                        | No           |
| CDK4                | VTLVFEHVDQDLR          | Yes               | 524.28                 | 288.2                 | 16.99                       | 68.6                      | 30.3                | 247606                          | ND                        | ND                        | No           |
| CDK4                | VTLVFEHVDQDLR          | Yes               | 524.28                 | 646.3                 | 16.99                       | 68.6                      | 33.3                | 45718                           | ND                        | ND                        | No           |
| CDK4                | VTLVFEHVDQDLR          | Yes               | 524.28                 | 745.4                 | 16.99                       | 68.6                      | 33.3                | 36723                           | ND                        | ND                        | No           |
| CDK4                | VTLVFEHVDQDLR          | Yes               | 524.28                 | 882.4                 | 16.99                       | 68.6                      | 33.3                | 26479                           | ND                        | ND                        | No           |
| CEAM5               | EVLLL VHNLPQH LFGYSWYK | Yes               | 819.44                 | 310.2                 | 24.27                       | 106.7                     | 42.3                | 4815                            | ND                        | ND                        | No           |
| CEAM5               | EVLLL VHNLPQH LFGYSWYK | Yes               | 819.44                 | 342.2                 | 24.27                       | 106.7                     | 45.3                | 8770                            | ND                        | ND                        | No           |
| CEAM5               | EVLLL VHNLPQH LFGYSWYK | Yes               | 819.44                 | 455.3                 | 24.27                       | 106.7                     | 42.3                | 5309                            | ND                        | ND                        | No           |

**Table S5.** MRM assay of individual proteins.

| Protein<br>(_HUMAN) | Peptide                | MS/MS<br>spectrum | Precursor ion<br>(m/z) | Fragment ion<br>(m/z) | Retention time<br>(minutes) | Decustering<br>potential | Collision<br>energy | Area of<br>synthetic<br>peptide | Area in control<br>sample | Area in disease<br>sample | Interference |
|---------------------|------------------------|-------------------|------------------------|-----------------------|-----------------------------|--------------------------|---------------------|---------------------------------|---------------------------|---------------------------|--------------|
| CEAM5               | EVLLL VHNLPQH LFGYSWYK | Yes               | 819.44                 | 950.4                 | 24.27                       | 106.7                    | 39.3                | 3947                            | ND                        | ND                        | No           |
| CEAM5               | INGIPQQHTQVLFIAK       | No                |                        |                       |                             |                          |                     |                                 |                           |                           |              |
| CEAM5               | LTIESTPFNVAEGK         | Yes               | 753.4                  | 404.2                 | 16.58                       | 98.2                     | 44.6                | 74712                           | ND                        | ND                        | No           |
| CEAM5               | LTIESTPFNVAEGK         | Yes               | 753.4                  | 457.3                 | 16.58                       | 98.2                     | 35.6                | 80732                           | ND                        | ND                        | No           |
| CEAM5               | LTIESTPFNVAEGK         | Yes               | 753.4                  | 861.4                 | 16.58                       | 98.2                     | 35.6                | 166575                          | ND                        | ND                        | No           |
| CEAM5               | LTIESTPFNVAEGK         | Yes               | 753.4                  | 962.5                 | 16.58                       | 98.2                     | 35.6                | 35164                           | ND                        | ND                        | No           |
| CEAM5               | QIIGYVIGTQQATPGPAYSGR  | Yes               | 726.38                 | 319.2                 | 16.24                       | 94.7                     | 40.6                | ND                              | ND                        | ND                        | No           |
| CEAM5               | QIIGYVIGTQQATPGPAYSGR  | Yes               | 726.38                 | 804.4                 | 16.24                       | 94.7                     | 31.6                | 51332                           | ND                        | ND                        | No           |
| CEAM5               | QIIGYVIGTQQATPGPAYSGR  | Yes               | 726.38                 | 905.4                 | 16.24                       | 94.7                     | 37.6                | 8187                            | ND                        | ND                        | No           |
| CEAM5               | QIIGYVIGTQQATPGPAYSGR  | Yes               | 726.38                 | 976.5                 | 16.24                       | 94.7                     | 34.6                | 4709                            | ND                        | ND                        | No           |
| CEAM5               | SDLVNEEATGQFR          | Yes               | 733.35                 | 316.2                 | 12.37                       | 95.6                     | 37.8                | 178652                          | ND                        | ND                        | No           |
| CEAM5               | SDLVNEEATGQFR          | Yes               | 733.35                 | 679.4                 | 12.37                       | 95.6                     | 40.8                | 44726                           | ND                        | ND                        | No           |
| CEAM5               | SDLVNEEATGQFR          | Yes               | 733.35                 | 808.4                 | 12.37                       | 95.6                     | 34.8                | 26119                           | ND                        | ND                        | No           |
| CEAM5               | SDLVNEEATGQFR          | Yes               | 733.35                 | 937.4                 | 12.37                       | 95.6                     | 34.8                | 9826                            | ND                        | ND                        | No           |
| CEAM8               | EVLLL VHNLPQDPR        | No                |                        |                       |                             |                          |                     |                                 |                           |                           |              |
| CEAM8               | GYNWYK                 | No                |                        |                       |                             |                          |                     |                                 |                           |                           |              |
| CEAM8               | LFIPNITTK              | Yes               | 523.82                 | 261.2                 | 17.09                       | 68.6                     | 25.5                | 2931811                         | ND                        | ND                        | No           |
| CEAM8               | LFIPNITTK              | Yes               | 523.82                 | 673.4                 | 17.09                       | 68.6                     | 25.5                | 1383799                         | ND                        | ND                        | No           |
| CEAM8               | LFIPNITTK              | Yes               | 523.82                 | 786.5                 | 17.09                       | 68.6                     | 25.5                | 616824                          | ND                        | ND                        | No           |
| CEAM8               | LFIPNITTK              | Yes               | 523.82                 | 933.5                 | 17.09                       | 68.6                     | 25.5                | 53239                           | ND                        | ND                        | No           |
| CEAM8               | TLTLLSVTR              | Yes               | 502.31                 | 462.3                 | 16.94                       | 65.8                     | 27.6                | 9731                            | ND                        | ND                        | No           |
| CEAM8               | TLTLLSVTR              | Yes               | 502.31                 | 575.4                 | 16.94                       | 65.8                     | 24.6                | 9076                            | ND                        | ND                        | No           |
| CEAM8               | TLTLLSVTR              | Yes               | 502.31                 | 688.4                 | 16.94                       | 65.8                     | 33.6                | 3973                            | ND                        | ND                        | No           |

**Table S5.** MRM assay of individual proteins.

| Protein<br>(_HUMAN) | Peptide                  | MS/MS<br>spectrum | Precursor ion<br>(m/z) | Fragment ion<br>(m/z) | Retention time<br>(minutes) | Declustering<br>potential | Collision<br>energy | Area of<br>synthetic<br>peptide | Area in control<br>sample | Area in disease<br>sample | Interference                           |
|---------------------|--------------------------|-------------------|------------------------|-----------------------|-----------------------------|---------------------------|---------------------|---------------------------------|---------------------------|---------------------------|----------------------------------------|
| CEAM8               | TLTLLSVTR                | Yes               | 502.31                 | 789.5                 | 16.94                       | 65.8                      | 24.6                | 14135                           | ND                        | ND                        | No                                     |
| CERU                | GAYPLSIEPIGVR            | Yes               | 686.39                 | 502.3                 | 17.91                       | 89.5                      | 29.7                | 3267                            | 99542                     | 40472                     | Yes (Based on<br>Transition<br>Ratios) |
| CERU                | GAYPLSIEPIGVR            | Yes               | 686.39                 | 541.3                 | 17.91                       | 89.5                      | 32.7                | 11058                           | 821576                    | 295104                    | No                                     |
| CERU                | GAYPLSIEPIGVR            | Yes               | 686.39                 | 870.5                 | 17.91                       | 89.5                      | 41.7                | 6416                            | 617660                    | 209269                    | No                                     |
| CERU                | GAYPLSIEPIGVR            | Yes               | 686.39                 | 983.6                 | 17.91                       | 89.5                      | 41.7                | 2317                            | 145152                    | 66620                     | No                                     |
| CERU                | GPEEEHLGILGPVIWAEVGDITIR | Yes               | 829.77                 | 561.3                 | 24.53                       | 108                       | 36.9                | 27339                           | 63776                     | 39820                     | No                                     |
| CERU                | GPEEEHLGILGPVIWAEVGDITIR | Yes               | 829.77                 | 660.4                 | 24.53                       | 108                       | 48.9                | 12449                           | 39626                     | 18428                     | No                                     |
| CERU                | GPEEEHLGILGPVIWAEVGDITIR | Yes               | 829.77                 | 789.4                 | 24.53                       | 108                       | 39.9                | 27804                           | 86417                     | 36624                     | No                                     |
| CERU                | GPEEEHLGILGPVIWAEVGDITIR | Yes               | 829.77                 | 860.4                 | 24.53                       | 108                       | 39.9                | 30845                           | 85765                     | 46367                     | No                                     |
| CERU                | IYHSHIDAPK               | Yes               | 394.21                 | 315.2                 | 7.05                        | 51.9                      | 26.7                | 78706                           | 52909                     | 23256                     | No                                     |
| CERU                | IYHSHIDAPK               | Yes               | 394.21                 | 430.2                 | 7.05                        | 51.9                      | 20.7                | 38348                           | 22790                     | 9958                      | No                                     |
| CERU                | IYHSHIDAPK               | Yes               | 394.21                 | 680.4                 | 7.05                        | 51.9                      | 23.7                | 21285                           | 11028                     | 6429                      | No                                     |
| CERU                | IYHSHIDAPK               | Yes               | 394.21                 | 767.4                 | 7.05                        | 51.9                      | 17.7                | 31642                           | 19163                     | 7560                      | No                                     |
| CERU                | NNEGTYYSPPNYPQSR         | Yes               | 952.41                 | 487.3                 | 10.15                       | 123.9                     | 44.4                | 18886                           | 32406                     | 9242                      | No                                     |
| CERU                | NNEGTYYSPPNYPQSR         | Yes               | 952.41                 | 516.2                 | 10.15                       | 123.9                     | 41.4                | ND                              | 4518                      | ND                        | Yes (Based on<br>Manual<br>Review)     |
| CERU                | NNEGTYYSPPNYPQSR         | Yes               | 952.41                 | 601.3                 | 10.15                       | 123.9                     | 41.4                | 11667                           | 16977                     | 4899                      | No                                     |
| CERU                | NNEGTYYSPPNYPQSR         | Yes               | 952.41                 | 975.5                 | 10.15                       | 123.9                     | 50.4                | 17215                           | 28442                     | 10869                     | No                                     |
| CERU                | SVPPSASHVAPTETFTYEWTVPK  | No                |                        |                       |                             |                           |                     |                                 |                           |                           |                                        |
| CH10                | DGDILGK                  | Yes               | 359.19                 | 317.2                 | 8.99                        | 47.3                      | 21.3                | 691996                          | ND                        | ND                        | No                                     |
| CH10                | DGDILGK                  | Yes               | 359.19                 | 430.3                 | 8.99                        | 47.3                      | 15.3                | 163507                          | ND                        | ND                        | No                                     |



**Table S5.** MRM assay of individual proteins.

| Protein<br>(_HUMAN) | Peptide        | MS/MS<br>spectrum | Precursor ion<br>(m/z) | Fragment ion<br>(m/z) | Retention time<br>(minutes) | Decustering<br>potential | Collision<br>energy | Area of<br>synthetic<br>peptide | Area in control<br>sample | Area in disease<br>sample | Interference |
|---------------------|----------------|-------------------|------------------------|-----------------------|-----------------------------|--------------------------|---------------------|---------------------------------|---------------------------|---------------------------|--------------|
| CH10                | DGDILGK        | Yes               | 359.19                 | 545.3                 | 8.99                        | 47.3                     | 18.3                | 239135                          | ND                        | ND                        | No           |
| CH10                | DGDILGK        | Yes               | 359.19                 | 602.4                 | 8.99                        | 47.3                     | 15.3                | 71944                           | ND                        | ND                        | No           |
| CH10                | DYFLFR         | Yes               | 430.72                 | 279.1                 | 19.42                       | 56.6                     | 18.5                | 333355                          | ND                        | ND                        | No           |
| CH10                | DYFLFR         | Yes               | 430.72                 | 322.2                 | 19.42                       | 56.6                     | 21.5                | 117471                          | ND                        | ND                        | No           |
| CH10                | DYFLFR         | Yes               | 430.72                 | 582.3                 | 19.42                       | 56.6                     | 21.5                | 444679                          | ND                        | ND                        | No           |
| CH10                | DYFLFR         | Yes               | 430.72                 | 745.4                 | 19.42                       | 56.6                     | 24.5                | 4260                            | ND                        | ND                        | No           |
| CH10                | GGEIQVSVK      | Yes               | 507.29                 | 357.2                 | 9.37                        | 66.4                     | 21.8                | 379199                          | ND                        | ND                        | No           |
| CH10                | GGEIQVSVK      | Yes               | 507.29                 | 529.3                 | 9.37                        | 66.4                     | 24.8                | 731486                          | ND                        | ND                        | No           |
| CH10                | GGEIQVSVK      | Yes               | 507.29                 | 657.4                 | 9.37                        | 66.4                     | 24.8                | 228452                          | ND                        | ND                        | No           |
| CH10                | GGEIQVSVK      | Yes               | 507.29                 | 770.5                 | 9.37                        | 66.4                     | 24.8                | 123445                          | ND                        | ND                        | No           |
| CH10                | VLLPEYGGTK     | Yes               | 538.8                  | 305.2                 | 12.97                       | 70.5                     | 35.2                | 199640                          | ND                        | ND                        | No           |
| CH10                | VLLPEYGGTK     | Yes               | 538.8                  | 654.3                 | 12.97                       | 70.5                     | 32.2                | 165814                          | ND                        | ND                        | No           |
| CH10                | VLLPEYGGTK     | Yes               | 538.8                  | 751.4                 | 12.97                       | 70.5                     | 26.2                | 1740986                         | ND                        | ND                        | No           |
| CH10                | VLLPEYGGTK     | Yes               | 538.8                  | 864.4                 | 12.97                       | 70.5                     | 26.2                | 330672                          | ND                        | ND                        | No           |
| CH10                | VLQATVVAVGSGSK | Yes               | 658.38                 | 534.3                 | 11.54                       | 85.9                     | 40.5                | 15772                           | ND                        | ND                        | No           |
| CH10                | VLQATVVAVGSGSK | Yes               | 658.38                 | 605.3                 | 11.54                       | 85.9                     | 40.5                | 25048                           | ND                        | ND                        | No           |
| CH10                | VLQATVVAVGSGSK | Yes               | 658.38                 | 704.4                 | 11.54                       | 85.9                     | 31.5                | 15387                           | ND                        | ND                        | No           |
| CH10                | VLQATVVAVGSGSK | Yes               | 658.38                 | 975.5                 | 11.54                       | 85.9                     | 31.5                | 5258                            | ND                        | ND                        | No           |
| CH60                | GIIDPTK        | Yes               | 372.22                 | 345.2                 | 9.12                        | 49                       | 21.9                | 112744                          | ND                        | ND                        | No           |
| CH60                | GIIDPTK        | Yes               | 372.22                 | 399.2                 | 9.12                        | 49                       | 18.9                | 3727                            | ND                        | ND                        | No           |
| CH60                | GIIDPTK        | Yes               | 372.22                 | 460.2                 | 9.12                        | 49                       | 18.9                | 21472                           | ND                        | ND                        | No           |
| CH60                | GIIDPTK        | Yes               | 372.22                 | 573.3                 | 9.12                        | 49                       | 18.9                | 116549                          | ND                        | ND                        | No           |
| CH60                | GYISPYFINTSK   | Yes               | 695.36                 | 421.2                 | 16.43                       | 90.7                     | 30.1                | 208246                          | ND                        | ND                        | No           |

**Table S5.** MRM assay of individual proteins.

| Protein<br>(_HUMAN) | Peptide                   | MS/MS<br>spectrum | Precursor ion<br>(m/z) | Fragment ion<br>(m/z) | Retention time<br>(minutes) | Decustering<br>potential | Collision<br>energy | Area of<br>synthetic<br>peptide | Area in control<br>sample | Area in disease<br>sample | Interference |
|---------------------|---------------------------|-------------------|------------------------|-----------------------|-----------------------------|--------------------------|---------------------|---------------------------------|---------------------------|---------------------------|--------------|
| CH60                | GYISPYFINTSK              | Yes               | 695.36                 | 449.2                 | 16.43                       | 90.7                     | 42.1                | 90581                           | ND                        | ND                        | No           |
| CH60                | GYISPYFINTSK              | Yes               | 695.36                 | 872.5                 | 16.43                       | 90.7                     | 42.1                | 34718                           | ND                        | ND                        | No           |
| CH60                | GYISPYFINTSK              | Yes               | 695.36                 | 969.5                 | 16.43                       | 90.7                     | 33.1                | 191136                          | ND                        | ND                        | No           |
| CH60                | LVQDVANNTNEEAGDGTTTATVLR  | Yes               | 854.09                 | 555.3                 | 12.60                       | 111.2                    | 41.1                | ND                              | ND                        | ND                        | No           |
| CH60                | LVQDVANNTNEEAGDGTTTATVLR  | Yes               | 854.09                 | 630.4                 | 12.60                       | 111.2                    | 41.1                | ND                              | ND                        | ND                        | No           |
| CH60                | LVQDVANNTNEEAGDGTTTATVLR  | Yes               | 854.09                 | 832.5                 | 12.60                       | 111.2                    | 38.1                | ND                              | ND                        | ND                        | No           |
| CH60                | LVQDVANNTNEEAGDGTTTATVLR  | Yes               | 854.09                 | 990.6                 | 12.60                       | 111.2                    | 41.1                | ND                              | ND                        | ND                        | No           |
| CH60                | TALLDAAGVASLLTTAEVVVTEIPK | Yes               | 828.14                 | 286.2                 | 25.09                       | 107.8                    | 39.8                | 14290                           | ND                        | ND                        | No           |
| CH60                | TALLDAAGVASLLTTAEVVVTEIPK | Yes               | 828.14                 | 486.3                 | 25.09                       | 107.8                    | 39.8                | 5679                            | ND                        | ND                        | No           |
| CH60                | TALLDAAGVASLLTTAEVVVTEIPK | Yes               | 828.14                 | 686.4                 | 25.09                       | 107.8                    | 36.8                | 9083                            | ND                        | ND                        | No           |
| CH60                | TALLDAAGVASLLTTAEVVVTEIPK | Yes               | 828.14                 | 785.5                 | 25.09                       | 107.8                    | 36.8                | 14912                           | ND                        | ND                        | No           |
| CH60                | TVIIQSWGSPK               | Yes               | 672.86                 | 314.2                 | 14.28                       | 87.8                     | 32.1                | 59452                           | ND                        | ND                        | No           |
| CH60                | TVIIQSWGSPK               | Yes               | 672.86                 | 331.2                 | 14.28                       | 87.8                     | 32.1                | 20125                           | ND                        | ND                        | No           |
| CH60                | TVIIQSWGSPK               | Yes               | 672.86                 | 789.4                 | 14.28                       | 87.8                     | 41.1                | 8565                            | ND                        | ND                        | No           |
| CH60                | TVIIQSWGSPK               | Yes               | 672.86                 | 918.4                 | 14.28                       | 87.8                     | 32.1                | 24053                           | ND                        | ND                        | No           |
| CKAP4               | DFTSLENTVEER              | Yes               | 720.34                 | 304.2                 | 15.90                       | 93.9                     | 40.2                | 34379                           | ND                        | ND                        | No           |
| CKAP4               | DFTSLENTVEER              | Yes               | 720.34                 | 747.4                 | 15.90                       | 93.9                     | 34.2                | 35437                           | ND                        | ND                        | No           |
| CKAP4               | DFTSLENTVEER              | Yes               | 720.34                 | 876.4                 | 15.90                       | 93.9                     | 34.2                | 37945                           | ND                        | ND                        | No           |
| CKAP4               | DFTSLENTVEER              | Yes               | 720.34                 | 989.5                 | 15.90                       | 93.9                     | 34.2                | 9635                            | ND                        | ND                        | No           |
| CKAP4               | IETNENNLESAK              | Yes               | 681.33                 | 305.2                 | 7.95                        | 88.9                     | 29.5                | 26083                           | ND                        | ND                        | No           |
| CKAP4               | IETNENNLESAK              | Yes               | 681.33                 | 434.2                 | 7.95                        | 88.9                     | 41.5                | 21425                           | ND                        | ND                        | No           |
| CKAP4               | IETNENNLESAK              | Yes               | 681.33                 | 775.4                 | 7.95                        | 88.9                     | 35.5                | 22525                           | ND                        | ND                        | No           |
| CKAP4               | IETNENNLESAK              | Yes               | 681.33                 | 904.4                 | 7.95                        | 88.9                     | 38.5                | 11899                           | ND                        | ND                        | No           |

**Table S5.** MRM assay of individual proteins.

| Protein<br>(_HUMAN) | Peptide                  | MS/MS<br>spectrum | Precursor ion<br>(m/z) | Fragment ion<br>(m/z) | Retention time<br>(minutes) | Declustering<br>potential | Collision<br>energy | Area of<br>synthetic<br>peptide | Area in control<br>sample | Area in disease<br>sample | Interference  |
|---------------------|--------------------------|-------------------|------------------------|-----------------------|-----------------------------|---------------------------|---------------------|---------------------------------|---------------------------|---------------------------|---------------|
| CKAP4               | LEGLGSSEADQDGLASTVR      | Yes               | 952.96                 | 300.2                 | 13.78                       | 123.9                     | 50.4                | 50307                           | ND                        | ND                        | No            |
| CKAP4               | LEGLGSSEADQDGLASTVR      | Yes               | 952.96                 | 462.3                 | 13.78                       | 123.9                     | 44.4                | 19072                           | ND                        | ND                        | No            |
| CKAP4               | LEGLGSSEADQDGLASTVR      | Yes               | 952.96                 | 533.3                 | 13.78                       | 123.9                     | 47.4                | 21066                           | ND                        | ND                        | No            |
| CKAP4               | LEGLGSSEADQDGLASTVR      | Yes               | 952.96                 | 818.4                 | 13.78                       | 123.9                     | 53.4                | 12526                           | ND                        | ND                        | No            |
| CKAP4               | LPPQDFLDR                | No                |                        |                       |                             |                           |                     |                                 |                           |                           |               |
| CKAP4               | VQSLQATFGTFESILR         | No                |                        |                       |                             |                           |                     |                                 |                           |                           |               |
| CL041               | ASAPLSQSGLATANGKPEPTISIS | Yes               | 1092.56                | 504.3                 | 12.57                       | 141.9                     | 56.6                | 3446                            | ND                        | ND                        | No            |
| CL041               | ASAPLSQSGLATANGKPEPTISIS | Yes               | 1092.56                | 730.4                 | 12.57                       | 141.9                     | 50.6                | 3125                            | ND                        | ND                        | No            |
| CL041               | ASAPLSQSGLATANGKPEPTISIS | Yes               | 1092.56                | 912.5                 | 12.57                       | 141.9                     | 56.6                | ND                              | ND                        | ND                        | No            |
| CL041               | ASAPLSQSGLATANGKPEPTISIS | Yes               | 1092.56                | 915.5                 | 12.57                       | 141.9                     | 59.6                | 2841                            | ND                        | ND                        | No            |
| CL041               | GDPDSEADSIDSDQEDPLK      | Yes               | 1016.93                | 357.3                 | 12.42                       | 132.2                     | 50.2                | 10331                           | ND                        | ND                        | No            |
| CL041               | GDPDSEADSIDSDQEDPLK      | Yes               | 1016.93                | 672.2                 | 12.42                       | 132.2                     | 47.2                | 3980                            | ND                        | ND                        | No            |
| CL041               | GDPDSEADSIDSDQEDPLK      | Yes               | 1016.93                | 729.4                 | 12.42                       | 132.2                     | 53.2                | 3279                            | ND                        | ND                        | No            |
| CL041               | GDPDSEADSIDSDQEDPLK      | Yes               | 1016.93                | 931.4                 | 12.42                       | 132.2                     | 47.2                | 4480                            | ND                        | ND                        | No            |
| CL041               | ILDEDSWSDGEQEPITVDQTDWR  | No                |                        |                       |                             |                           |                     |                                 |                           |                           |               |
| CL041               | TELGSQTPESSR             | Yes               | 646.31                 | 575.3                 | 7.03                        | 84.4                      | 33.9                | 72293                           | ND                        | 3693                      | No            |
| CL041               | TELGSQTPESSR             | Yes               | 646.31                 | 676.3                 | 7.03                        | 84.4                      | 33.9                | 40866                           | ND                        | 4196                      | No            |
| CL041               | TELGSQTPESSR             | Yes               | 646.31                 | 891.4                 | 7.03                        | 84.4                      | 33.9                | 16930                           | 3662                      | 3165                      | No            |
| CL041               | TELGSQTPESSR             | Yes               | 646.31                 | 948.4                 | 7.03                        | 84.4                      | 30.9                | 32117                           | ND                        | ND                        | No            |
| CL041               | YGVEALLHR                | Yes               | 353.2                  | 312.2                 | 14.66                       | 46.6                      | 24.6                | 80008                           | ND                        | ND                        | No            |
| CL041               | YGVEALLHR                | Yes               | 353.2                  | 425.3                 | 14.66                       | 46.6                      | 18.6                | 41884                           | ND                        | ND                        | No            |
| CL041               | YGVEALLHR                | Yes               | 353.2                  | 609.4                 | 14.66                       | 46.6                      | 24.6                | 24999                           | ND                        | ND                        | No            |
| CL041               | YGVEALLHR                | Yes               | 353.2                  | 738.4                 | 14.66                       | 46.6                      | 24.6                | ND                              | ND                        | ND                        | Yes (Based on |

**Table S5.** MRM assay of individual proteins.

| Protein<br>(_HUMAN) | Peptide                        | MS/MS<br>spectrum | Precursor ion<br>(m/z) | Fragment ion<br>(m/z) | Retention time<br>(minutes) | Decustering<br>potential | Collision<br>energy | Area of<br>synthetic<br>peptide | Area in control<br>sample | Area in disease<br>sample | Interference                           |
|---------------------|--------------------------------|-------------------|------------------------|-----------------------|-----------------------------|--------------------------|---------------------|---------------------------------|---------------------------|---------------------------|----------------------------------------|
|                     |                                |                   |                        |                       |                             |                          |                     |                                 |                           |                           | Manual<br>Review)                      |
| CLCA1               | ASVTALIESVNGK                  | Yes               | 644.86                 | 504.3                 | 17.85                       | 84.2                     | 39.9                | 26063                           | ND                        | ND                        | No                                     |
| CLCA1               | ASVTALIESVNGK                  | Yes               | 644.86                 | 746.4                 | 17.85                       | 84.2                     | 30.9                | 35386                           | ND                        | ND                        | No                                     |
| CLCA1               | ASVTALIESVNGK                  | Yes               | 644.86                 | 859.5                 | 17.85                       | 84.2                     | 30.9                | 16063                           | ND                        | ND                        | No                                     |
| CLCA1               | ASVTALIESVNGK                  | Yes               | 644.86                 | 930.5                 | 17.85                       | 84.2                     | 30.9                | 9999                            | ND                        | ND                        | No                                     |
| CLCA1               | SEISNIAR                       | No                |                        |                       |                             |                          |                     |                                 |                           |                           |                                        |
| CLCA1               | TSSGGSFVASDVPNAPIPDLFPPGQITDLK | No                |                        |                       |                             |                          |                     |                                 |                           |                           |                                        |
| CLCA1               | TVTLELLDNGAGADATK              | Yes               | 844.94                 | 302.2                 | 17.16                       | 110                      | 39.7                | 34268                           | ND                        | ND                        | No                                     |
| CLCA1               | TVTLELLDNGAGADATK              | Yes               | 844.94                 | 690.3                 | 17.16                       | 110                      | 39.7                | 14930                           | ND                        | ND                        | No                                     |
| CLCA1               | TVTLELLDNGAGADATK              | Yes               | 844.94                 | 804.4                 | 17.16                       | 110                      | 48.7                | 18762                           | ND                        | ND                        | No                                     |
| CLCA1               | TVTLELLDNGAGADATK              | Yes               | 844.94                 | 919.4                 | 17.16                       | 110                      | 39.7                | 29879                           | ND                        | ND                        | No                                     |
| CLCA1               | WGVFDEYNNDEK                   | No                |                        |                       |                             |                          |                     |                                 |                           |                           |                                        |
| CLIC1               | FSAYIK                         | Yes               | 364.7                  | 260.2                 | 10.84                       | 48                       | 24.5                | 595472                          | ND                        | ND                        | No                                     |
| CLIC1               | FSAYIK                         | Yes               | 364.7                  | 423.3                 | 10.84                       | 48                       | 27.5                | 101951                          | ND                        | ND                        | No                                     |
| CLIC1               | FSAYIK                         | Yes               | 364.7                  | 494.3                 | 10.84                       | 48                       | 18.5                | 718926                          | ND                        | ND                        | No                                     |
| CLIC1               | FSAYIK                         | Yes               | 364.7                  | 581.3                 | 10.84                       | 48                       | 18.5                | 954036                          | ND                        | ND                        | No                                     |
| CLIC1               | GFTIPEAFR                      | No                |                        |                       |                             |                          |                     |                                 |                           |                           |                                        |
| CLIC1               | LAALNPESNTAGLDIFAK             | Yes               | 922.99                 | 256.2                 | 20.11                       | 120.1                    | 46.1                | 251074                          | 24648                     | 35646                     | Yes (Based on<br>Transition<br>Ratios) |
| CLIC1               | LAALNPESNTAGLDIFAK             | Yes               | 922.99                 | 478.3                 | 20.11                       | 120.1                    | 52.1                | 32561                           | ND                        | ND                        | No                                     |
| CLIC1               | LAALNPESNTAGLDIFAK             | Yes               | 922.99                 | 483.3                 | 20.11                       | 120.1                    | 40.1                | 131558                          | ND                        | 2907                      | Yes (Based on<br>Transition<br>Ratios) |

**Table S5.** MRM assay of individual proteins.

| Protein<br>(_HUMAN) | Peptide            | MS/MS<br>spectrum | Precursor ion<br>(m/z) | Fragment ion<br>(m/z) | Retention time<br>(minutes) | Declustering<br>potential | Collision<br>energy | Area of<br>synthetic<br>peptide | Area in control<br>sample | Area in disease<br>sample | Interference |
|---------------------|--------------------|-------------------|------------------------|-----------------------|-----------------------------|---------------------------|---------------------|---------------------------------|---------------------------|---------------------------|--------------|
| CLIC1               | LAALNPESNTAGLDIFAK | Yes               | 922.99                 | 593.3                 | 20.11                       | 120.1                     | 43.1                | 34385                           | ND                        | ND                        | No           |
| CLIC1               | NSNPALNDNLEK       | Yes               | 664.83                 | 316.1                 | 9.48                        | 86.8                      | 28.8                | 197486                          | 1502                      | ND                        | No           |
| CLIC1               | NSNPALNDNLEK       | Yes               | 664.83                 | 732.4                 | 9.48                        | 86.8                      | 31.8                | 96972                           | 1130                      | ND                        | No           |
| CLIC1               | NSNPALNDNLEK       | Yes               | 664.83                 | 845.4                 | 9.48                        | 86.8                      | 40.8                | 98520                           | ND                        | ND                        | No           |
| CLIC1               | NSNPALNDNLEK       | Yes               | 664.83                 | 916.5                 | 9.48                        | 86.8                      | 31.8                | 28861                           | ND                        | ND                        | No           |
| CLIC1               | YLSNAYAR           | Yes               | 479.24                 | 409.2                 | 8.63                        | 62.8                      | 26.6                | 7272                            | ND                        | ND                        | No           |
| CLIC1               | YLSNAYAR           | Yes               | 479.24                 | 594.3                 | 8.63                        | 62.8                      | 32.6                | 5315                            | ND                        | ND                        | No           |
| CLIC1               | YLSNAYAR           | Yes               | 479.24                 | 681.3                 | 8.63                        | 62.8                      | 20.6                | 36170                           | ND                        | ND                        | No           |
| CLIC1               | YLSNAYAR           | Yes               | 479.24                 | 794.4                 | 8.63                        | 62.8                      | 29.6                | 6873                            | ND                        | ND                        | No           |
| CLUS                | ASSIIDELFQDR       | Yes               | 465.24                 | 418.2                 | 22.96                       | 61                        | 21.3                | 49973                           | 276207                    | 299523                    | No           |
| CLUS                | ASSIIDELFQDR       | Yes               | 465.24                 | 565.3                 | 22.96                       | 61                        | 21.3                | 36875                           | 225494                    | 240691                    | No           |
| CLUS                | ASSIIDELFQDR       | Yes               | 465.24                 | 678.4                 | 22.96                       | 61                        | 18.3                | 5657                            | 39256                     | 45385                     | No           |
| CLUS                | ASSIIDELFQDR       | Yes               | 465.24                 | 807.4                 | 22.96                       | 61                        | 27.3                | 4947                            | 22753                     | 22626                     | No           |
| CLUS                | EIQNAVNGVK         | Yes               | 536.29                 | 417.2                 | 8.40                        | 70.2                      | 23.1                | 21019                           | 121356                    | 95814                     | No           |
| CLUS                | EIQNAVNGVK         | Yes               | 536.29                 | 587.4                 | 8.40                        | 70.2                      | 32.1                | 13887                           | 77194                     | 76501                     | No           |
| CLUS                | EIQNAVNGVK         | Yes               | 536.29                 | 701.4                 | 8.40                        | 70.2                      | 26.1                | 21989                           | 116214                    | 109011                    | No           |
| CLUS                | EIQNAVNGVK         | Yes               | 536.29                 | 829.5                 | 8.40                        | 70.2                      | 26.1                | 17366                           | 95497                     | 77738                     | No           |
| CLUS                | IDSLENDR           | Yes               | 537.78                 | 646.3                 | 11.84                       | 70.4                      | 26.2                | 63530                           | ND                        | ND                        | No           |
| CLUS                | IDSLENDR           | Yes               | 537.78                 | 759.4                 | 11.84                       | 70.4                      | 26.2                | 18675                           | ND                        | ND                        | No           |
| CLUS                | IDSLENDR           | Yes               | 537.78                 | 846.4                 | 11.84                       | 70.4                      | 26.2                | 39885                           | ND                        | ND                        | No           |
| CLUS                | IDSLENDR           | Yes               | 537.78                 | 961.5                 | 11.84                       | 70.4                      | 26.2                | 20410                           | ND                        | ND                        | No           |
| CLUS                | LANLTQGEDQYYLR     | Yes               | 842.42                 | 299.2                 | 15.01                       | 109.7                     | 39.6                | 156005                          | 15195                     | 8822                      | No           |
| CLUS                | LANLTQGEDQYYLR     | Yes               | 842.42                 | 412.3                 | 15.01                       | 109.7                     | 39.6                | 46631                           | 6453                      | 4504                      | No           |

**Table S5.** MRM assay of individual proteins.

| Protein<br>(_HUMAN) | Peptide                         | MS/MS<br>spectrum | Precursor ion<br>(m/z) | Fragment ion<br>(m/z) | Retention time<br>(minutes) | Decustering<br>potential | Collision<br>energy | Area of<br>synthetic<br>peptide | Area in control<br>sample | Area in disease<br>sample | Interference |
|---------------------|---------------------------------|-------------------|------------------------|-----------------------|-----------------------------|--------------------------|---------------------|---------------------------------|---------------------------|---------------------------|--------------|
| CLUS                | LANLTQGEDQYYLR                  | Yes               | 842.42                 | 451.3                 | 15.01                       | 109.7                    | 39.6                | 29979                           | ND                        | 5067                      | No           |
| CLUS                | LANLTQGEDQYYLR                  | Yes               | 842.42                 | 742.4                 | 15.01                       | 109.7                    | 48.6                | 45149                           | ND                        | 5127                      | No           |
| CLUS                | VTTVASHTSDSDVPSGVTEVVVK         | No                |                        |                       |                             |                          |                     |                                 |                           |                           |              |
| CMGA                | AEGNNQAPGEEEEEEEEATNTHPPASLPSQK | No                |                        |                       |                             |                          |                     |                                 |                           |                           |              |
| CMGA                | EAVEEPSSK                       | Yes               | 488.24                 | 418.2                 | 5.78                        | 64                       | 24                  | 240271                          | ND                        | ND                        | No           |
| CMGA                | EAVEEPSSK                       | Yes               | 488.24                 | 547.3                 | 5.78                        | 64                       | 21                  | 125345                          | ND                        | ND                        | No           |
| CMGA                | EAVEEPSSK                       | Yes               | 488.24                 | 676.3                 | 5.78                        | 64                       | 21                  | 122989                          | ND                        | ND                        | No           |
| CMGA                | EAVEEPSSK                       | Yes               | 488.24                 | 775.4                 | 5.78                        | 64                       | 21                  | 48704                           | ND                        | ND                        | No           |
| CMGA                | SEALAVDGAGKPGAEAAQDPEGK         | Yes               | 742.69                 | 288.1                 | 9.62                        | 96.8                     | 38.4                | 38315                           | ND                        | ND                        | No           |
| CMGA                | SEALAVDGAGKPGAEAAQDPEGK         | Yes               | 742.69                 | 401.2                 | 9.62                        | 96.8                     | 35.4                | 7531                            | ND                        | ND                        | No           |
| CMGA                | SEALAVDGAGKPGAEAAQDPEGK         | Yes               | 742.69                 | 430.2                 | 9.62                        | 96.8                     | 44.4                | 17732                           | ND                        | ND                        | No           |
| CMGA                | SEALAVDGAGKPGAEAAQDPEGK         | Yes               | 742.69                 | 472.2                 | 9.62                        | 96.8                     | 32.4                | 11210                           | ND                        | ND                        | No           |
| CMGA                | SGELEQEEER                      | Yes               | 603.27                 | 690.3                 | 7.00                        | 78.8                     | 29                  | 31569                           | ND                        | ND                        | No           |
| CMGA                | SGELEQEEER                      | Yes               | 603.27                 | 819.3                 | 7.00                        | 78.8                     | 32                  | 51021                           | ND                        | ND                        | No           |
| CMGA                | SGELEQEEER                      | Yes               | 603.27                 | 902.4                 | 7.00                        | 78.8                     | 29                  | 40548                           | ND                        | ND                        | No           |
| CMGA                | SGELEQEEER                      | Yes               | 603.27                 | 932.4                 | 7.00                        | 78.8                     | 32                  | 17744                           | ND                        | ND                        | No           |
| CMGA                | YGPQAEGDSEGLSQGLVDR             | Yes               | 1037.99                | 743.3                 | 13.69                       | 134.9                    | 57.2                | 4357                            | ND                        | ND                        | No           |
| CMGA                | YGPQAEGDSEGLSQGLVDR             | Yes               | 1037.99                | 774.4                 | 13.69                       | 134.9                    | 54.2                | 4979                            | ND                        | ND                        | No           |
| CMGA                | YGPQAEGDSEGLSQGLVDR             | Yes               | 1037.99                | 915.4                 | 13.69                       | 134.9                    | 54.2                | 3438                            | ND                        | ND                        | No           |
| CMGA                | YGPQAEGDSEGLSQGLVDR             | Yes               | 1037.99                | 944.5                 | 13.69                       | 134.9                    | 57.2                | 4095                            | ND                        | ND                        | No           |
| CNTN1               | AHSDGGDGVVSQVK                  | Yes               | 452.56                 | 525.2                 | 7.33                        | 59.4                     | 29.6                | 41322                           | 7305                      | 2962                      | No           |
| CNTN1               | AHSDGGDGVVSQVK                  | Yes               | 452.56                 | 560.3                 | 7.33                        | 59.4                     | 20.6                | 332139                          | 29001                     | 32250                     | No           |
| CNTN1               | AHSDGGDGVVSQVK                  | Yes               | 452.56                 | 697.3                 | 7.33                        | 59.4                     | 17.6                | 180384                          | 12732                     | 17667                     | No           |

**Table S5.** MRM assay of individual proteins.

| Protein<br>(_HUMAN) | Peptide                  | MS/MS<br>spectrum | Precursor ion<br>(m/z) | Fragment ion<br>(m/z) | Retention time<br>(minutes) | Decustering<br>potential | Collision<br>energy | Area of<br>synthetic<br>peptide | Area in control<br>sample | Area in disease<br>sample | Interference                       |
|---------------------|--------------------------|-------------------|------------------------|-----------------------|-----------------------------|--------------------------|---------------------|---------------------------------|---------------------------|---------------------------|------------------------------------|
| CNTN1               | AHSDGGDGVVSQVK           | Yes               | 452.56                 | 796.3                 | 7.33                        | 59.4                     | 20.6                | 64702                           | 7580                      | 3631                      | No                                 |
| CNTN1               | DGEYVVEVR                | Yes               | 533.26                 | 274.2                 | 11.47                       | 69.8                     | 35                  | ND                              | 32365                     | 35099                     | Yes (Based on<br>Manual<br>Review) |
| CNTN1               | DGEYVVEVR                | Yes               | 533.26                 | 502.3                 | 11.47                       | 69.8                     | 29                  | ND                              | 18432                     | 18887                     | Yes (Based on<br>Manual<br>Review) |
| CNTN1               | DGEYVVEVR                | Yes               | 533.26                 | 601.4                 | 11.47                       | 69.8                     | 26                  | 75018                           | 21021                     | 17935                     | No                                 |
| CNTN1               | DGEYVVEVR                | Yes               | 533.26                 | 764.4                 | 11.47                       | 69.8                     | 26                  | 59811                           | 9617                      | 13138                     | No                                 |
| CNTN1               | HSIEVPIPR                | No                |                        |                       |                             |                          |                     |                                 |                           |                           |                                    |
| CNTN1               | STEATLSFGYLDPFPPPEERPEVR | Yes               | 879.77                 | 389.2                 | 22.10                       | 114.5                    | 42.4                | ND                              | ND                        | ND                        |                                    |
| CNTN1               | TTKPYPADIVVQFK           | Yes               | 536.3                  | 591.3                 | 16.26                       | 70.2                     | 24.9                | 67046                           | ND                        | ND                        | No                                 |
| CNTN1               | TTKPYPADIVVQFK           | Yes               | 536.3                  | 620.4                 | 16.26                       | 70.2                     | 24.9                | 211362                          | ND                        | ND                        | No                                 |
| CNTN1               | TTKPYPADIVVQFK           | Yes               | 536.3                  | 848.5                 | 16.26                       | 70.2                     | 24.9                | 60973                           | ND                        | ND                        | No                                 |
| CNTN1               | TTKPYPADIVVQFK           | Yes               | 536.3                  | 874.4                 | 16.26                       | 70.2                     | 24.9                | 70651                           | ND                        | ND                        | No                                 |
| CO4A1               | GDPGTPGVPGK              | Yes               | 491.25                 | 301.2                 | 7.15                        | 64.4                     | 33.1                | 397555                          | ND                        | ND                        | No                                 |
| CO4A1               | GDPGTPGVPGK              | Yes               | 491.25                 | 428.2                 | 7.15                        | 64.4                     | 21.1                | 86532                           | ND                        | ND                        | No                                 |
| CO4A1               | GDPGTPGVPGK              | Yes               | 491.25                 | 554.3                 | 7.15                        | 64.4                     | 24.1                | 134917                          | ND                        | ND                        | No                                 |
| CO4A1               | GDPGTPGVPGK              | Yes               | 491.25                 | 712.4                 | 7.15                        | 64.4                     | 21.1                | 11490                           | ND                        | ND                        | No                                 |
| CO4A1               | GEPGVGLPGLK              | Yes               | 512.3                  | 414.3                 | 14.28                       | 67.1                     | 34                  | 721898                          | ND                        | ND                        | No                                 |
| CO4A1               | GEPGVGLPGLK              | Yes               | 512.3                  | 584.4                 | 14.28                       | 67.1                     | 34                  | 159954                          | ND                        | ND                        | No                                 |
| CO4A1               | GEPGVGLPGLK              | Yes               | 512.3                  | 740.5                 | 14.28                       | 67.1                     | 31                  | 176274                          | ND                        | ND                        | No                                 |
| CO4A1               | GEPGVGLPGLK              | Yes               | 512.3                  | 837.5                 | 14.28                       | 67.1                     | 25                  | 98626                           | ND                        | ND                        | No                                 |
| CO4A1               | GPPGGVGFPSR              | No                |                        |                       |                             |                          |                     |                                 |                           |                           |                                    |

**Table S5.** MRM assay of individual proteins.

| Protein<br>(_HUMAN) | Peptide               | MS/MS<br>spectrum | Precursor ion<br>(m/z) | Fragment ion<br>(m/z) | Retention time<br>(minutes) | Declustering<br>potential | Collision<br>energy | Area of<br>synthetic<br>peptide | Area in control<br>sample | Area in disease<br>sample | Interference |
|---------------------|-----------------------|-------------------|------------------------|-----------------------|-----------------------------|---------------------------|---------------------|---------------------------------|---------------------------|---------------------------|--------------|
| CO4A1               | GPPGPQGPPGEIGFPGQPGAK | Yes               | 971.49                 | 372.2                 | 14.08                       | 126.3                     | 51.2                | 86151                           | ND                        | ND                        | No           |
| CO4A1               | GPPGPQGPPGEIGFPGQPGAK | Yes               | 971.49                 | 591.3                 | 14.08                       | 126.3                     | 54.2                | 16781                           | ND                        | ND                        | No           |
| CO4A1               | GPPGPQGPPGEIGFPGQPGAK | Yes               | 971.49                 | 654.4                 | 14.08                       | 126.3                     | 54.2                | 28435                           | ND                        | ND                        | No           |
| CO4A1               | GPPGPQGPPGEIGFPGQPGAK | Yes               | 971.49                 | 858.4                 | 14.08                       | 126.3                     | 54.2                | 5320                            | ND                        | ND                        | No           |
| CO4A1               | ILYHGYSLLYVQGNER      | Yes               | 963                    | 475.2                 | 16.77                       | 125.2                     | 47.9                | ND                              | ND                        | ND                        | No           |
| CO4A1               | ILYHGYSLLYVQGNER      | Yes               | 963                    | 527.3                 | 16.77                       | 125.2                     | 44.9                | ND                              | ND                        | ND                        | No           |
| CO4A1               | ILYHGYSLLYVQGNER      | Yes               | 963                    | 702.4                 | 16.77                       | 125.2                     | 47.9                | ND                              | ND                        | ND                        | No           |
| CO4A1               | ILYHGYSLLYVQGNER      | Yes               | 963                    | 747.4                 | 16.77                       | 125.2                     | 50.9                | ND                              | ND                        | ND                        | No           |
| CO5A2               | DGEVGPSGPVGPPLAGER    | Yes               | 874.43                 | 361.2                 | 12.70                       | 113.8                     | 44                  | 12553                           | ND                        | ND                        | No           |
| CO5A2               | DGEVGPSGPVGPPLAGER    | Yes               | 874.43                 | 458.2                 | 12.70                       | 113.8                     | 38                  | 5937                            | ND                        | ND                        | No           |
| CO5A2               | DGEVGPSGPVGPPLAGER    | Yes               | 874.43                 | 853.5                 | 12.70                       | 113.8                     | 41                  | 28409                           | ND                        | ND                        | No           |
| CO5A2               | DGEVGPSGPVGPPLAGER    | Yes               | 874.43                 | 895.4                 | 12.70                       | 113.8                     | 41                  | 6993                            | ND                        | ND                        | No           |
| CO5A2               | GPEGPPGKPGEDGEPEGR    | Yes               | 544.93                 | 284.1                 | 8.81                        | 71.3                      | 25.3                | ND                              | ND                        | ND                        | No           |
| CO5A2               | GPEGPPGKPGEDGEPEGR    | Yes               | 544.93                 | 438.2                 | 8.81                        | 71.3                      | 31.3                | ND                              | ND                        | ND                        | No           |
| CO5A2               | GPEGPPGKPGEDGEPEGR    | Yes               | 544.93                 | 515.3                 | 8.81                        | 71.3                      | 25.3                | ND                              | ND                        | ND                        | No           |
| CO5A2               | GPEGPPGKPGEDGEPEGR    | Yes               | 544.93                 | 913.4                 | 8.81                        | 71.3                      | 31.3                | ND                              | ND                        | ND                        | No           |
| CO5A2               | GTQGPPGATGFPGSAGR     | Yes               | 757.87                 | 344.2                 | 10.46                       | 98.8                      | 35.8                | 6641                            | ND                        | ND                        | No           |
| CO5A2               | GTQGPPGATGFPGSAGR     | Yes               | 757.87                 | 544.3                 | 10.46                       | 98.8                      | 35.8                | 18617                           | ND                        | ND                        | No           |
| CO5A2               | GTQGPPGATGFPGSAGR     | Yes               | 757.87                 | 849.4                 | 10.46                       | 98.8                      | 41.8                | 7045                            | ND                        | ND                        | No           |
| CO5A2               | GTQGPPGATGFPGSAGR     | Yes               | 757.87                 | 977.5                 | 10.46                       | 98.8                      | 44.8                | 2035                            | ND                        | ND                        | No           |
| CO5A2               | LGPLGAPGEDGRPGPPSIGIR | No                |                        |                       |                             |                           |                     |                                 |                           |                           |              |
| CO5A2               | VGPPGPAGAPGPAGPLGEPGK | Yes               | 593.98                 | 697.4                 | 11.86                       | 77.6                      | 27.8                | 32430                           | ND                        | ND                        | No           |
| CO5A2               | VGPPGPAGAPGPAGPLGEPGK | Yes               | 593.98                 | 704.4                 | 11.86                       | 77.6                      | 27.8                | 57361                           | ND                        | ND                        | No           |



**Table S5.** MRM assay of individual proteins.

| Protein<br>(_HUMAN) | Peptide                   | MS/MS<br>spectrum | Precursor ion<br>(m/z) | Fragment ion<br>(m/z) | Retention time<br>(minutes) | Declustering<br>potential | Collision<br>energy | Area of<br>synthetic<br>peptide | Area in control<br>sample | Area in disease<br>sample | Interference                       |
|---------------------|---------------------------|-------------------|------------------------|-----------------------|-----------------------------|---------------------------|---------------------|---------------------------------|---------------------------|---------------------------|------------------------------------|
| CO5A2               | VGPPGPAGAPGPAGPLGEPGK     | Yes               | 593.98                 | 754.4                 | 11.86                       | 77.6                      | 24.8                | 33471                           | ND                        | ND                        | No                                 |
| CO5A2               | VGPPGPAGAPGPAGPLGEPGK     | Yes               | 593.98                 | 858.4                 | 11.86                       | 77.6                      | 36.8                | 14965                           | ND                        | ND                        | No                                 |
| CO6A3               | ALGSAIEYTIENVFESAPNPR     | Yes               | 760.05                 | 483.3                 | 24.61                       | 99                        | 36.3                | 29935                           | ND                        | 12426                     | No                                 |
| CO6A3               | ALGSAIEYTIENVFESAPNPR     | Yes               | 760.05                 | 554.3                 | 24.61                       | 99                        | 36.3                | 12272                           | ND                        | ND                        | No                                 |
| CO6A3               | ALGSAIEYTIENVFESAPNPR     | Yes               | 760.05                 | 641.3                 | 24.61                       | 99                        | 33.3                | ND                              | ND                        | 9091                      | Yes (Based on<br>Manual<br>Review) |
| CO6A3               | ALGSAIEYTIENVFESAPNPR     | Yes               | 760.05                 | 917.4                 | 24.61                       | 99                        | 39.3                | 18692                           | ND                        | 3763                      | No                                 |
| CO6A3               | IGDLHPQIVNLLK             | Yes               | 487.29                 | 536.3                 | 18.33                       | 63.9                      | 22.4                | 11276                           | 3587                      | 5448                      | No                                 |
| CO6A3               | IGDLHPQIVNLLK             | Yes               | 487.29                 | 761.4                 | 18.33                       | 63.9                      | 31.4                | ND                              | 4684                      | 6846                      | Yes (Based on<br>Manual<br>Review) |
| CO6A3               | IGDLHPQIVNLLK             | Yes               | 487.29                 | 924.6                 | 18.33                       | 63.9                      | 25.4                | 43184                           | 22358                     | 17009                     | No                                 |
| CO6A3               | IGDLHPQIVNLLK             | Yes               | 487.29                 | 973.5                 | 18.33                       | 63.9                      | 19.4                | ND                              | ND                        | ND                        | No                                 |
| CO6A3               | NADPAELEQIVLSPAFILAAESLPK | Yes               | 879.48                 | 598.2                 | 24.71                       | 114.5                     | 51.4                | 7384                            | ND                        | ND                        | No                                 |
| CO6A3               | NADPAELEQIVLSPAFILAAESLPK | Yes               | 879.48                 | 711.3                 | 24.71                       | 114.5                     | 42.4                | 5738                            | ND                        | ND                        | No                                 |
| CO6A3               | NADPAELEQIVLSPAFILAAESLPK | Yes               | 879.48                 | 828.5                 | 24.71                       | 114.5                     | 42.4                | 12266                           | ND                        | ND                        | No                                 |
| CO6A3               | NADPAELEQIVLSPAFILAAESLPK | Yes               | 879.48                 | 941.6                 | 24.71                       | 114.5                     | 45.4                | 3799                            | ND                        | ND                        | No                                 |
| CO6A3               | VAVVQYSDR                 | Yes               | 518.77                 | 668.3                 | 8.90                        | 67.9                      | 25.3                | 36578                           | 16925                     | 12421                     | No                                 |
| CO6A3               | VAVVQYSDR                 | Yes               | 518.77                 | 767.4                 | 8.90                        | 67.9                      | 28.3                | 34106                           | 12685                     | 16170                     | No                                 |
| CO6A3               | VAVVQYSDR                 | Yes               | 518.77                 | 866.4                 | 8.90                        | 67.9                      | 25.3                | 14429                           | 5963                      | 4705                      | No                                 |
| CO6A3               | VAVVQYSDR                 | Yes               | 518.77                 | 937.5                 | 8.90                        | 67.9                      | 28.3                | 15640                           | 2096                      | 2986                      | No                                 |
| CO6A3               | WYYDPNTK                  | Yes               | 543.75                 | 459.3                 | 11.80                       | 71.1                      | 32.4                | 184505                          | ND                        | ND                        | No                                 |
| CO6A3               | WYYDPNTK                  | Yes               | 543.75                 | 574.3                 | 11.80                       | 71.1                      | 26.4                | 38014                           | ND                        | ND                        | No                                 |

**Table S5.** MRM assay of individual proteins.

| <b>Protein<br/>(_HUMAN)</b> | <b>Peptide</b>       | <b>MS/MS<br/>spectrum</b> | <b>Precursor ion<br/>(m/z)</b> | <b>Fragment ion<br/>(m/z)</b> | <b>Retention time<br/>(minutes)</b> | <b>Declustering<br/>potential</b> | <b>Collision<br/>energy</b> | <b>Area of<br/>synthetic<br/>peptide</b> | <b>Area in control<br/>sample</b> | <b>Area in disease<br/>sample</b> | <b>Interference</b> |
|-----------------------------|----------------------|---------------------------|--------------------------------|-------------------------------|-------------------------------------|-----------------------------------|-----------------------------|------------------------------------------|-----------------------------------|-----------------------------------|---------------------|
| CO6A3                       | WYYDPNTK             | Yes                       | 543.75                         | 737.3                         | 11.80                               | 71.1                              | 26.4                        | 128266                                   | ND                                | ND                                | No                  |
| CO6A3                       | WYYDPNTK             | Yes                       | 543.75                         | 900.4                         | 11.80                               | 71.1                              | 26.4                        | 33055                                    | ND                                | ND                                | No                  |
| COCA1                       | GPGDLEAPSNLVISER     | Yes                       | 827.43                         | 327.1                         | 15.53                               | 107.7                             | 47.9                        | 115985                                   | ND                                | ND                                | No                  |
| COCA1                       | GPGDLEAPSNLVISER     | Yes                       | 827.43                         | 391.2                         | 15.53                               | 107.7                             | 41.9                        | 42169                                    | ND                                | ND                                | No                  |
| COCA1                       | GPGDLEAPSNLVISER     | Yes                       | 827.43                         | 440.2                         | 15.53                               | 107.7                             | 41.9                        | 35588                                    | ND                                | ND                                | No                  |
| COCA1                       | GPGDLEAPSNLVISER     | Yes                       | 827.43                         | 640.3                         | 15.53                               | 107.7                             | 38.9                        | 54523                                    | ND                                | ND                                | No                  |
| COCA1                       | ITVDPTTDGPTK         | Yes                       | 622.82                         | 402.2                         | 9.06                                | 81.3                              | 38.9                        | 489472                                   | ND                                | ND                                | No                  |
| COCA1                       | ITVDPTTDGPTK         | Yes                       | 622.82                         | 429.2                         | 9.06                                | 81.3                              | 29.9                        | 284347                                   | ND                                | ND                                | No                  |
| COCA1                       | ITVDPTTDGPTK         | Yes                       | 622.82                         | 816.4                         | 9.06                                | 81.3                              | 29.9                        | 427932                                   | ND                                | ND                                | No                  |
| COCA1                       | ITVDPTTDGPTK         | Yes                       | 622.82                         | 931.4                         | 9.06                                | 81.3                              | 29.9                        | 131790                                   | ND                                | ND                                | No                  |
| COCA1                       | SLYDDVDTGEK          | Yes                       | 621.28                         | 333.2                         | 10.96                               | 81.1                              | 38.8                        | 65911                                    | ND                                | ND                                | No                  |
| COCA1                       | SLYDDVDTGEK          | Yes                       | 621.28                         | 549.3                         | 10.96                               | 81.1                              | 38.8                        | 87076                                    | ND                                | ND                                | No                  |
| COCA1                       | SLYDDVDTGEK          | Yes                       | 621.28                         | 763.3                         | 10.96                               | 81.1                              | 29.8                        | 80140                                    | ND                                | ND                                | No                  |
| COCA1                       | SLYDDVDTGEK          | Yes                       | 621.28                         | 878.4                         | 10.96                               | 81.1                              | 29.8                        | 69051                                    | ND                                | ND                                | No                  |
| COCA1                       | SQDEVEIPAR           | Yes                       | 572.29                         | 343.2                         | 10.01                               | 74.8                              | 24.7                        | 193420                                   | ND                                | ND                                | No                  |
| COCA1                       | SQDEVEIPAR           | Yes                       | 572.29                         | 684.4                         | 10.01                               | 74.8                              | 36.7                        | 49376                                    | ND                                | ND                                | No                  |
| COCA1                       | SQDEVEIPAR           | Yes                       | 572.29                         | 813.4                         | 10.01                               | 74.8                              | 27.7                        | 21953                                    | ND                                | ND                                | No                  |
| COCA1                       | SQDEVEIPAR           | Yes                       | 572.29                         | 928.5                         | 10.01                               | 74.8                              | 27.7                        | 51798                                    | ND                                | ND                                | No                  |
| COCA1                       | VTDETTDSFK           | Yes                       | 571.76                         | 597.3                         | 8.11                                | 74.8                              | 33.7                        | 57318                                    | ND                                | ND                                | No                  |
| COCA1                       | VTDETTDSFK           | Yes                       | 571.76                         | 698.3                         | 8.11                                | 74.8                              | 36.7                        | 47120                                    | ND                                | ND                                | No                  |
| COCA1                       | VTDETTDSFK           | Yes                       | 571.76                         | 827.4                         | 8.11                                | 74.8                              | 27.7                        | 53434                                    | ND                                | ND                                | No                  |
| COCA1                       | VTDETTDSFK           | Yes                       | 571.76                         | 942.4                         | 8.11                                | 74.8                              | 27.7                        | 167492                                   | ND                                | ND                                | No                  |
| COF1                        | EILVGDVGQTVDPPYATFVK | Yes                       | 1083.55                        | 356.2                         | 20.03                               | 140.8                             | 53.2                        | 26457                                    | ND                                | ND                                | No                  |

**Table S5.** MRM assay of individual proteins.

| Protein<br>(_HUMAN) | Peptide                        | MS/MS<br>spectrum | Precursor ion<br>(m/z) | Fragment ion<br>(m/z) | Retention time<br>(minutes) | Declustering<br>potential | Collision<br>energy | Area of<br>synthetic<br>peptide | Area in control<br>sample | Area in disease<br>sample | Interference                           |
|---------------------|--------------------------------|-------------------|------------------------|-----------------------|-----------------------------|---------------------------|---------------------|---------------------------------|---------------------------|---------------------------|----------------------------------------|
| COF1                | EILVGDVGQTVDDPYATFVK           | Yes               | 1083.55                | 627.3                 | 20.03                       | 140.8                     | 50.2                | 9667                            | ND                        | ND                        | No                                     |
| COF1                | EILVGDVGQTVDDPYATFVK           | Yes               | 1083.55                | 825.5                 | 20.03                       | 140.8                     | 56.2                | 29037                           | ND                        | ND                        | No                                     |
| COF1                | EILVGDVGQTVDDPYATFVK           | Yes               | 1083.55                | 940.5                 | 20.03                       | 140.8                     | 59.2                | 4703                            | ND                        | ND                        | No                                     |
| COF1                | LGGSAVISLEGKPL                 | Yes               | 670.89                 | 414.3                 | 17.23                       | 87.5                      | 41                  | ND                              | ND                        | ND                        | No                                     |
| COF1                | LGGSAVISLEGKPL                 | Yes               | 670.89                 | 485.3                 | 17.23                       | 87.5                      | 38                  | 21078                           | ND                        | ND                        | No                                     |
| COF1                | LGGSAVISLEGKPL                 | Yes               | 670.89                 | 743.4                 | 17.23                       | 87.5                      | 32                  | 25603                           | ND                        | ND                        | No                                     |
| COF1                | LGGSAVISLEGKPL                 | Yes               | 670.89                 | 856.5                 | 17.23                       | 87.5                      | 32                  | 21956                           | ND                        | ND                        | No                                     |
| COF1                | YALYDATYETK                    | Yes               | 669.32                 | 641.3                 | 12.93                       | 87.3                      | 40.9                | 17157                           | 3181                      | 6530                      | Yes (Based on<br>Transition<br>Ratios) |
| COF1                | YALYDATYETK                    | Yes               | 669.32                 | 712.4                 | 12.93                       | 87.3                      | 40.9                | 37165                           | ND                        | 3600                      | No                                     |
| COF1                | YALYDATYETK                    | Yes               | 669.32                 | 827.4                 | 12.93                       | 87.3                      | 31.9                | 95002                           | 5147                      | 7677                      | No                                     |
| COF1                | YALYDATYETK                    | Yes               | 669.32                 | 990.4                 | 12.93                       | 87.3                      | 31.9                | 50507                           | 2058                      | 2055                      | No                                     |
| COIA1               | ADDILASPPR                     | Yes               | 527.78                 | 302.1                 | 11.37                       | 69.1                      | 31.7                | 64978                           | ND                        | ND                        | No                                     |
| COIA1               | ADDILASPPR                     | Yes               | 527.78                 | 369.2                 | 11.37                       | 69.1                      | 22.7                | 30226                           | ND                        | ND                        | No                                     |
| COIA1               | ADDILASPPR                     | Yes               | 527.78                 | 456.3                 | 11.37                       | 69.1                      | 25.7                | 18372                           | ND                        | ND                        | No                                     |
| COIA1               | ADDILASPPR                     | Yes               | 527.78                 | 640.4                 | 11.37                       | 69.1                      | 25.7                | 25580                           | ND                        | ND                        | No                                     |
| COIA1               | AVGLAGTFR                      | Yes               | 446.26                 | 480.3                 | 12.95                       | 58.6                      | 22.1                | 106939                          | 25505                     | 18437                     | No                                     |
| COIA1               | AVGLAGTFR                      | Yes               | 446.26                 | 551.3                 | 12.95                       | 58.6                      | 22.1                | 189558                          | 32038                     | 21513                     | No                                     |
| COIA1               | AVGLAGTFR                      | Yes               | 446.26                 | 664.4                 | 12.95                       | 58.6                      | 22.1                | 14494                           | 2036                      | 2037                      | No                                     |
| COIA1               | AVGLAGTFR                      | Yes               | 446.26                 | 721.4                 | 12.95                       | 58.6                      | 22.1                | 254985                          | 29053                     | 22315                     | No                                     |
| COIA1               | DELLFPSWEALFSGSEGPLKPGAR       | No                |                        |                       |                             |                           |                     |                                 |                           |                           |                                        |
| COIA1               | LSGVQDGHQDISLLYTEPGAGQTHTAASFR | No                |                        |                       |                             |                           |                     |                                 |                           |                           |                                        |
| COIA1               | TEAPSATGQASSLLGGR              | Yes               | 801.91                 | 289.2                 | 13.02                       | 104.4                     | 37.8                | 83374                           | 3715                      | 4565                      | No                                     |

**Table S5.** MRM assay of individual proteins.

| Protein<br>(_HUMAN) | Peptide                       | MS/MS<br>spectrum | Precursor ion<br>(m/z) | Fragment ion<br>(m/z) | Retention time<br>(minutes) | Declustering<br>potential | Collision<br>energy | Area of<br>synthetic<br>peptide | Area in control<br>sample | Area in disease<br>sample | Interference                           |
|---------------------|-------------------------------|-------------------|------------------------|-----------------------|-----------------------------|---------------------------|---------------------|---------------------------------|---------------------------|---------------------------|----------------------------------------|
| COIA1               | TEAPSATGQASSLLGGR             | Yes               | 801.91                 | 302.1                 | 13.02                       | 104.4                     | 37.8                | 59638                           | 3553                      | 2971                      | No                                     |
| COIA1               | TEAPSATGQASSLLGGR             | Yes               | 801.91                 | 760.4                 | 13.02                       | 104.4                     | 46.8                | 40838                           | 3555                      | ND                        | No                                     |
| COIA1               | TEAPSATGQASSLLGGR             | Yes               | 801.91                 | 945.5                 | 13.02                       | 104.4                     | 40.8                | 46084                           | 4045                      | 4072                      | No                                     |
| COX5A               | EIYPYVIQELRPTLNELGISTPEELGLDK | No                |                        |                       |                             |                           |                     |                                 |                           |                           |                                        |
| COX5A               | GLLHSAR                       | Yes               | 377.22                 | 284.2                 | 7.03                        | 49.7                      | 16.1                | ND                              | ND                        | ND                        | No                                     |
| COX5A               | GLLHSAR                       | Yes               | 377.22                 | 333.2                 | 7.03                        | 49.7                      | 25.1                | ND                              | ND                        | ND                        | No                                     |
| COX5A               | GLLHSAR                       | Yes               | 377.22                 | 470.2                 | 7.03                        | 49.7                      | 22.1                | ND                              | ND                        | ND                        | No                                     |
| COX5A               | GLLHSAR                       | Yes               | 377.22                 | 583.3                 | 7.03                        | 49.7                      | 19.1                | 46861                           | ND                        | ND                        | No                                     |
| COX5A               | IIDAALR                       | Yes               | 386.24                 | 359.2                 | 10.38                       | 50.8                      | 19.5                | 7154                            | ND                        | ND                        | No                                     |
| COX5A               | IIDAALR                       | Yes               | 386.24                 | 430.3                 | 10.38                       | 50.8                      | 28.5                | 46988                           | ND                        | ND                        | No                                     |
| COX5A               | IIDAALR                       | Yes               | 386.24                 | 545.3                 | 10.38                       | 50.8                      | 19.5                | 143162                          | ND                        | ND                        | No                                     |
| COX5A               | IIDAALR                       | Yes               | 386.24                 | 658.4                 | 10.38                       | 50.8                      | 28.5                | 15898                           | ND                        | ND                        | No                                     |
| COX5A               | ILEVVK                        | Yes               | 350.73                 | 455.3                 | 10.67                       | 46.2                      | 17.9                | 15946                           | ND                        | ND                        | No                                     |
| COX5A               | ILEVVK                        | Yes               | 350.73                 | 474.3                 | 10.67                       | 46.2                      | 17.9                | 681903                          | ND                        | ND                        | No                                     |
| COX5A               | ILEVVK                        | Yes               | 350.73                 | 554.4                 | 10.67                       | 46.2                      | 14.9                | 4303                            | ND                        | ND                        | No                                     |
| COX5A               | ILEVVK                        | Yes               | 350.73                 | 587.4                 | 10.67                       | 46.2                      | 17.9                | 435901                          | ND                        | ND                        | No                                     |
| COX5A               | TPGPAVAIQSVR                  | No                |                        |                       |                             |                           |                     |                                 |                           |                           |                                        |
| CRP                 | APLTKPLK                      | Yes               | 434.29                 | 357.3                 | 7.31                        | 57                        | 30.6                | 280845                          | 1577327                   | 1908902                   | Yes (Based on<br>Transition<br>Ratios) |
| CRP                 | APLTKPLK                      | Yes               | 434.29                 | 586.4                 | 7.31                        | 57                        | 24.6                | 84437                           | 617737                    | 617997                    | Yes (Based on<br>Transition<br>Ratios) |
| CRP                 | APLTKPLK                      | Yes               | 434.29                 | 699.5                 | 7.31                        | 57                        | 24.6                | 100933                          | ND                        | 51133                     | Yes (Based on<br>Transition            |

**Table S5.** MRM assay of individual proteins.

| Protein<br>(_HUMAN) | Peptide                   | MS/MS<br>spectrum | Precursor ion<br>(m/z) | Fragment ion<br>(m/z) | Retention time<br>(minutes) | Declustering<br>potential | Collision<br>energy | Area of<br>synthetic<br>peptide | Area in control<br>sample | Area in disease<br>sample | Interference<br><br>Ratios)            |
|---------------------|---------------------------|-------------------|------------------------|-----------------------|-----------------------------|---------------------------|---------------------|---------------------------------|---------------------------|---------------------------|----------------------------------------|
| CRP                 | APLTKPLK                  | Yes               | 434.29                 | 796.5                 | 7.31                        | 57                        | 21.6                | 15825                           | 10533                     | ND                        | Yes (Based on<br>Transition<br>Ratios) |
| CRP                 | ESDTSYVSLK                | Yes               | 564.77                 | 347.2                 | 10.75                       | 73.9                      | 27.4                | 359646                          | 175461                    | 70274                     | No                                     |
| CRP                 | ESDTSYVSLK                | Yes               | 564.77                 | 446.3                 | 10.75                       | 73.9                      | 27.4                | 130551                          | 70944                     | 22325                     | No                                     |
| CRP                 | ESDTSYVSLK                | Yes               | 564.77                 | 609.4                 | 10.75                       | 73.9                      | 27.4                | 125689                          | 66445                     | 31824                     | No                                     |
| CRP                 | ESDTSYVSLK                | Yes               | 564.77                 | 696.4                 | 10.75                       | 73.9                      | 27.4                | 144853                          | 73836                     | 23902                     | No                                     |
| CRP                 | YEVQGEVFTKPQLWP           | Yes               | 910.96                 | 293.1                 | 20.66                       | 118.5                     | 45.6                | 7092                            | 77998                     | 39706                     | No                                     |
| CRP                 | YEVQGEVFTKPQLWP           | Yes               | 910.96                 | 302.2                 | 20.66                       | 118.5                     | 39.6                | 5640                            | 47999                     | 17822                     | No                                     |
| CRP                 | YEVQGEVFTKPQLWP           | Yes               | 910.96                 | 392.2                 | 20.66                       | 118.5                     | 39.6                | 3329                            | 13149                     | 9645                      | No                                     |
| CRP                 | YEVQGEVFTKPQLWP           | Yes               | 910.96                 | 520.2                 | 20.66                       | 118.5                     | 39.6                | 2108                            | 14527                     | 7644                      | No                                     |
| CS051               | AQADLLAHLVPEPDR           | Yes               | 548.96                 | 387.2                 | 18.69                       | 71.8                      | 34.5                | 145950                          | ND                        | ND                        | No                                     |
| CS051               | AQADLLAHLVPEPDR           | Yes               | 548.96                 | 613.3                 | 18.69                       | 71.8                      | 22.5                | 300098                          | ND                        | ND                        | No                                     |
| CS051               | AQADLLAHLVPEPDR           | Yes               | 548.96                 | 712.4                 | 18.69                       | 71.8                      | 34.5                | 96273                           | ND                        | ND                        | No                                     |
| CS051               | AQADLLAHLVPEPDR           | Yes               | 548.96                 | 825.4                 | 18.69                       | 71.8                      | 31.5                | 78434                           | ND                        | ND                        | No                                     |
| CS051               | DTGVAFELR                 | Yes               | 504.26                 | 288.2                 | 14.71                       | 66                        | 33.7                | 151577                          | ND                        | ND                        | No                                     |
| CS051               | DTGVAFELR                 | Yes               | 504.26                 | 564.3                 | 14.71                       | 66                        | 24.7                | 110051                          | ND                        | ND                        | No                                     |
| CS051               | DTGVAFELR                 | Yes               | 504.26                 | 635.4                 | 14.71                       | 66                        | 24.7                | 225223                          | ND                        | ND                        | No                                     |
| CS051               | DTGVAFELR                 | Yes               | 504.26                 | 791.4                 | 14.71                       | 66                        | 24.7                | 113411                          | ND                        | ND                        | No                                     |
| CS051               | GYWGDIATGPFVAFGIEADDESLLR | No                |                        |                       |                             |                           |                     |                                 |                           |                           |                                        |
| CS051               | LEEQLPWLSLR               | Yes               | 692.39                 | 500.2                 | 22.58                       | 90.3                      | 33                  | 76609                           | ND                        | ND                        | No                                     |
| CS051               | LEEQLPWLSLR               | Yes               | 692.39                 | 613.3                 | 22.58                       | 90.3                      | 30                  | 126926                          | ND                        | ND                        | No                                     |
| CS051               | LEEQLPWLSLR               | Yes               | 692.39                 | 771.5                 | 22.58                       | 90.3                      | 33                  | 360035                          | ND                        | ND                        | No                                     |

**Table S5.** MRM assay of individual proteins.

| Protein<br>(_HUMAN) | Peptide                 | MS/MS<br>spectrum | Precursor ion<br>(m/z) | Fragment ion<br>(m/z) | Retention time<br>(minutes) | Decustering<br>potential | Collision<br>energy | Area of<br>synthetic<br>peptide | Area in control<br>sample | Area in disease<br>sample | Interference                       |
|---------------------|-------------------------|-------------------|------------------------|-----------------------|-----------------------------|--------------------------|---------------------|---------------------------------|---------------------------|---------------------------|------------------------------------|
| CS051               | LEEQLPWLSLR             | Yes               | 692.39                 | 884.5                 | 22.58                       | 90.3                     | 30                  | 48049                           | ND                        | ND                        | No                                 |
| CS051               | TAGEITQHNVTELLR         | Yes               | 561.3                  | 401.3                 | 15.32                       | 73.4                     | 32.2                | 10655                           | ND                        | ND                        | No                                 |
| CS051               | TAGEITQHNVTELLR         | Yes               | 561.3                  | 631.4                 | 15.32                       | 73.4                     | 23.2                | 4626                            | ND                        | ND                        | No                                 |
| CS051               | TAGEITQHNVTELLR         | Yes               | 561.3                  | 730.4                 | 15.32                       | 73.4                     | 32.2                | 5899                            | ND                        | ND                        | No                                 |
| CS051               | TAGEITQHNVTELLR         | Yes               | 561.3                  | 981.5                 | 15.32                       | 73.4                     | 32.2                | 3279                            | ND                        | ND                        | No                                 |
| CSF1                | DNTPNAIAIVQLQELSLR      | No                |                        |                       |                             |                          |                     |                                 |                           |                           |                                    |
| CSF1                | DPPEPGSPR               | Yes               | 476.23                 | 310.1                 | 6.06                        | 62.4                     | 29.5                | 11703                           | ND                        | ND                        | No                                 |
| CSF1                | DPPEPGSPR               | Yes               | 476.23                 | 439.2                 | 6.06                        | 62.4                     | 20.5                | 24628                           | ND                        | ND                        | No                                 |
| CSF1                | DPPEPGSPR               | Yes               | 476.23                 | 513.3                 | 6.06                        | 62.4                     | 23.5                | 50299                           | ND                        | ND                        | No                                 |
| CSF1                | DPPEPGSPR               | Yes               | 476.23                 | 739.4                 | 6.06                        | 62.4                     | 23.5                | 70429                           | ND                        | ND                        | No                                 |
| CSF1                | FNSVPLTDTGHER           | Yes               | 491.58                 | 262.1                 | 10.58                       | 64.4                     | 22.6                | ND                              | 8988                      | 4415                      | Yes (Based on<br>Manual<br>Review) |
| CSF1                | FNSVPLTDTGHER           | Yes               | 491.58                 | 599.3                 | 10.58                       | 64.4                     | 31.6                | ND                              | 8732                      | 2411                      | Yes (Based on<br>Manual<br>Review) |
| CSF1                | FNSVPLTDTGHER           | Yes               | 491.58                 | 714.3                 | 10.58                       | 64.4                     | 31.6                | 19974                           | ND                        | ND                        | No                                 |
| CSF1                | FNSVPLTDTGHER           | Yes               | 491.58                 | 815.4                 | 10.58                       | 64.4                     | 31.6                | ND                              | 4449                      | 3944                      | Yes (Based on<br>Manual<br>Review) |
| CSF1                | ISSLRPQGLSNPSTLSAQPQLSR | Yes               | 813.11                 | 999.6                 | 13.87                       | 105.9                    | 39                  | 6180                            | ND                        | ND                        | No                                 |
| CSF1                | ISSLRPQGLSNPSTLSAQPQLSR | Yes               | 813.11                 | 600.3                 | 13.87                       | 105.9                    | 42                  | 37252                           | ND                        | ND                        | No                                 |
| CSF1                | ISSLRPQGLSNPSTLSAQPQLSR | Yes               | 813.11                 | 728.4                 | 13.87                       | 105.9                    | 36                  | 13067                           | ND                        | ND                        | No                                 |
| CSF1                | ISSLRPQGLSNPSTLSAQPQLSR | Yes               | 813.11                 | 886.5                 | 13.87                       | 105.9                    | 48                  | 18025                           | ND                        | ND                        | No                                 |
| CSF1                | TFYETPLQLEK             | No                |                        |                       |                             |                          |                     |                                 |                           |                           |                                    |

**Table S5.** MRM assay of individual proteins.

| Protein<br>(_HUMAN) | Peptide            | MS/MS<br>spectrum | Precursor ion<br>(m/z) | Fragment ion<br>(m/z) | Retention time<br>(minutes) | Declustering<br>potential | Collision<br>energy | Area of<br>synthetic<br>peptide | Area in control<br>sample | Area in disease<br>sample | Interference |
|---------------------|--------------------|-------------------|------------------------|-----------------------|-----------------------------|---------------------------|---------------------|---------------------------------|---------------------------|---------------------------|--------------|
| CSF2                | No peptide         |                   |                        |                       |                             |                           |                     |                                 |                           |                           |              |
| CT085               | IELPER             | Yes               | 378.72                 | 304.2                 | 10.36                       | 49.9                      | 28.2                | 4194                            | ND                        | ND                        | No           |
| CT085               | IELPER             | Yes               | 378.72                 | 401.2                 | 10.36                       | 49.9                      | 22.2                | 24918                           | ND                        | ND                        | No           |
| CT085               | IELPER             | Yes               | 378.72                 | 514.3                 | 10.36                       | 49.9                      | 19.2                | 19958                           | ND                        | ND                        | No           |
| CT085               | IELPER             | Yes               | 378.72                 | 643.3                 | 10.36                       | 49.9                      | 19.2                | 10792                           | ND                        | ND                        | No           |
| CT085               | IRPVTPVEK          | Yes               | 346.88                 | 375.2                 | 7.74                        | 45.7                      | 21.2                | 70236                           | ND                        | ND                        | No           |
| CT085               | IRPVTPVEK          | Yes               | 346.88                 | 466.3                 | 7.74                        | 45.7                      | 18.2                | 183212                          | ND                        | ND                        | No           |
| CT085               | IRPVTPVEK          | Yes               | 346.88                 | 472.3                 | 7.74                        | 45.7                      | 15.2                | 282122                          | ND                        | ND                        | No           |
| CT085               | IRPVTPVEK          | Yes               | 346.88                 | 567.4                 | 7.74                        | 45.7                      | 15.2                | 92847                           | ND                        | ND                        | No           |
| CT085               | QNWPQNWGFLTPFEELIK | Yes               | 1174.59                | 373.3                 | 24.67                       | 152.5                     | 57.2                | 2811                            | ND                        | ND                        | No           |
| CT085               | QNWPQNWGFLTPFEELIK | Yes               | 1174.59                | 429.2                 | 24.67                       | 152.5                     | 51.2                | 5527                            | ND                        | ND                        | No           |
| CT085               | QNWPQNWGFLTPFEELIK | Yes               | 1174.59                | 526.2                 | 24.67                       | 152.5                     | 60.2                | 3068                            | ND                        | ND                        | No           |
| CT085               | QNWPQNWGFLTPFEELIK | Yes               | 1174.59                | 875.5                 | 24.67                       | 152.5                     | 60.2                | 6913                            | ND                        | ND                        | No           |
| CT085               | SAVPGLNK           | Yes               | 393.23                 | 261.2                 | 8.77                        | 51.7                      | 25.8                | 157451                          | ND                        | ND                        | No           |
| CT085               | SAVPGLNK           | Yes               | 393.23                 | 431.3                 | 8.77                        | 51.7                      | 28.8                | 62691                           | ND                        | ND                        | No           |
| CT085               | SAVPGLNK           | Yes               | 393.23                 | 528.3                 | 8.77                        | 51.7                      | 19.8                | 632582                          | ND                        | ND                        | No           |
| CT085               | SAVPGLNK           | Yes               | 393.23                 | 627.4                 | 8.77                        | 51.7                      | 19.8                | 71132                           | ND                        | ND                        | No           |
| CT085               | VFPSPPVPQTTQGFIGWR | Yes               | 1007.53                | 344.2                 | 20.53                       | 131                       | 55.8                | 4750                            | ND                        | ND                        | No           |
| CT085               | VFPSPPVPQTTQGFIGWR | Yes               | 1007.53                | 418.2                 | 20.53                       | 131                       | 46.8                | 4370                            | ND                        | ND                        | No           |
| CT085               | VFPSPPVPQTTQGFIGWR | Yes               | 1007.53                | 431.2                 | 20.53                       | 131                       | 43.8                | 4335                            | ND                        | ND                        | No           |
| CT085               | VFPSPPVPQTTQGFIGWR | Yes               | 1007.53                | 724.4                 | 20.53                       | 131                       | 43.8                | 9779                            | ND                        | ND                        | No           |
| CTGF                | DQTVVGPALAAAYR     | Yes               | 680.86                 | 345.1                 | 14.39                       | 88.8                      | 32.5                | 146090                          | ND                        | ND                        | No           |
| CTGF                | DQTVVGPALAAAYR     | Yes               | 680.86                 | 761.4                 | 14.39                       | 88.8                      | 32.5                | 85815                           | ND                        | ND                        | No           |

**Table S5.** MRM assay of individual proteins.

| Protein<br>(_HUMAN) | Peptide        | MS/MS<br>spectrum | Precursor ion<br>(m/z) | Fragment ion<br>(m/z) | Retention time<br>(minutes) | Decustering<br>potential | Collision<br>energy | Area of<br>synthetic<br>peptide | Area in control<br>sample | Area in disease<br>sample | Interference |
|---------------------|----------------|-------------------|------------------------|-----------------------|-----------------------------|--------------------------|---------------------|---------------------------------|---------------------------|---------------------------|--------------|
| CTGF                | DQTVVGPALAAAYR | Yes               | 680.86                 | 818.5                 | 14.39                       | 88.8                     | 32.5                | 245458                          | ND                        | ND                        | No           |
| CTGF                | DQTVVGPALAAAYR | Yes               | 680.86                 | 917.5                 | 14.39                       | 88.8                     | 32.5                | 149236                          | ND                        | ND                        | No           |
| CTGF                | TTTLPVEFK      | Yes               | 518.29                 | 294.2                 | 14.51                       | 67.9                     | 31.3                | 414553                          | ND                        | ND                        | No           |
| CTGF                | TTTLPVEFK      | Yes               | 518.29                 | 619.3                 | 14.51                       | 67.9                     | 25.3                | 603333                          | ND                        | ND                        | No           |
| CTGF                | TTTLPVEFK      | Yes               | 518.29                 | 732.4                 | 14.51                       | 67.9                     | 25.3                | 144773                          | ND                        | ND                        | No           |
| CTGF                | TTTLPVEFK      | Yes               | 518.29                 | 833.5                 | 14.51                       | 67.9                     | 25.3                | 453384                          | ND                        | ND                        | No           |
| CYR61               | ALALVVTLLHLTR  | No                |                        |                       |                             |                          |                     |                                 |                           |                           |              |
| CYR61               | ELGFDASEVELTR  | Yes               | 733.36                 | 518.3                 | 16.83                       | 95.6                     | 31.8                | 32196                           | ND                        | ND                        | No           |
| CYR61               | ELGFDASEVELTR  | Yes               | 733.36                 | 617.4                 | 16.83                       | 95.6                     | 43.8                | 27170                           | ND                        | ND                        | No           |
| CYR61               | ELGFDASEVELTR  | Yes               | 733.36                 | 833.4                 | 16.83                       | 95.6                     | 37.8                | 56202                           | ND                        | ND                        | No           |
| CYR61               | ELGFDASEVELTR  | Yes               | 733.36                 | 904.5                 | 16.83                       | 95.6                     | 34.8                | 29225                           | ND                        | ND                        | No           |
| CYR61               | ILYNPLQGQK     | No                |                        |                       |                             |                          |                     |                                 |                           |                           |              |
| CYR61               | LFNDIHK        | Yes               | 296.16                 | 397.3                 | 9.61                        | 39.2                     | 15.7                | 18408                           | ND                        | ND                        | No           |
| CYR61               | LFNDIHK        | Yes               | 296.16                 | 490.2                 | 9.61                        | 39.2                     | 12.7                | 18359                           | ND                        | ND                        | No           |
| CYR61               | LFNDIHK        | Yes               | 296.16                 | 512.3                 | 9.61                        | 39.2                     | 15.7                | 5197                            | ND                        | ND                        | No           |
| CYR61               | LFNDIHK        | Yes               | 296.16                 | 626.3                 | 9.61                        | 39.2                     | 21.7                | 887                             | ND                        | ND                        | No           |
| CYR61               | NNELIAVGK      | Yes               | 479.27                 | 303.2                 | 11.01                       | 62.8                     | 32.6                | 156552                          | ND                        | ND                        | No           |
| CYR61               | NNELIAVGK      | Yes               | 479.27                 | 374.2                 | 11.01                       | 62.8                     | 32.6                | 222206                          | ND                        | ND                        | No           |
| CYR61               | NNELIAVGK      | Yes               | 479.27                 | 600.4                 | 11.01                       | 62.8                     | 23.6                | 113403                          | ND                        | ND                        | No           |
| CYR61               | NNELIAVGK      | Yes               | 479.27                 | 729.5                 | 11.01                       | 62.8                     | 23.6                | 67990                           | ND                        | ND                        | No           |
| CYTA                | LEAVQYK        | Yes               | 425.74                 | 314.2                 | 8.59                        | 55.9                     | 21.2                | 132368                          | ND                        | ND                        | No           |
| CYTA                | LEAVQYK        | Yes               | 425.74                 | 537.3                 | 8.59                        | 55.9                     | 21.2                | 143964                          | ND                        | ND                        | No           |
| CYTA                | LEAVQYK        | Yes               | 425.74                 | 541.3                 | 8.59                        | 55.9                     | 21.2                | 7411                            | ND                        | ND                        | No           |



**Table S5.** MRM assay of individual proteins.

| <b>Protein<br/>(_HUMAN)</b> | <b>Peptide</b>       | <b>MS/MS<br/>spectrum</b> | <b>Precursor ion<br/>(m/z)</b> | <b>Fragment ion<br/>(m/z)</b> | <b>Retention time<br/>(minutes)</b> | <b>Declustering<br/>potential</b> | <b>Collision<br/>energy</b> | <b>Area of<br/>synthetic<br/>peptide</b> | <b>Area in control<br/>sample</b> | <b>Area in disease<br/>sample</b> | <b>Interference</b> |
|-----------------------------|----------------------|---------------------------|--------------------------------|-------------------------------|-------------------------------------|-----------------------------------|-----------------------------|------------------------------------------|-----------------------------------|-----------------------------------|---------------------|
| CYTA                        | LEAVQYK              | Yes                       | 425.74                         | 608.3                         | 8.59                                | 55.9                              | 21.2                        | 1126130                                  | ND                                | ND                                | No                  |
| CYTA                        | SLPGQNE DLVLTGYQV DK | Yes                       | 659.34                         | 709.4                         | 16.55                               | 86.1                              | 31.2                        | 21427                                    | ND                                | ND                                | No                  |
| CYTA                        | SLPGQNE DLVLTGYQV DK | Yes                       | 659.34                         | 810.4                         | 16.55                               | 86.1                              | 31.2                        | 18038                                    | ND                                | ND                                | No                  |
| CYTA                        | SLPGQNE DLVLTGYQV DK | Yes                       | 659.34                         | 841.4                         | 16.55                               | 86.1                              | 37.2                        | 1575                                     | ND                                | ND                                | No                  |
| CYTA                        | SLPGQNE DLVLTGYQV DK | Yes                       | 659.34                         | 923.5                         | 16.55                               | 86.1                              | 31.2                        | 7488                                     | ND                                | ND                                | No                  |
| CYTA                        | TNETY GK             | Yes                       | 406.69                         | 367.2                         | 5.49                                | 53.5                              | 23.4                        | 134783                                   | ND                                | ND                                | No                  |
| CYTA                        | TNETY GK             | Yes                       | 406.69                         | 468.2                         | 5.49                                | 53.5                              | 20.4                        | 62722                                    | ND                                | ND                                | No                  |
| CYTA                        | TNETY GK             | Yes                       | 406.69                         | 597.3                         | 5.49                                | 53.5                              | 20.4                        | 182225                                   | ND                                | ND                                | No                  |
| CYTA                        | TNETY GK             | Yes                       | 406.69                         | 711.3                         | 5.49                                | 53.5                              | 20.4                        | 56539                                    | ND                                | ND                                | No                  |
| CYTA                        | TQVVAGTNYI K         | No                        |                                |                               |                                     |                                   |                             |                                          |                                   |                                   |                     |
| CYTA                        | VKPQLEEK             | Yes                       | 324.19                         | 276.2                         | 6.41                                | 42.8                              | 23.1                        | 54061                                    | ND                                | ND                                | No                  |
| CYTA                        | VKPQLEEK             | Yes                       | 324.19                         | 405.2                         | 6.41                                | 42.8                              | 14.1                        | 57757                                    | ND                                | ND                                | No                  |
| CYTA                        | VKPQLEEK             | Yes                       | 324.19                         | 453.3                         | 6.41                                | 42.8                              | 17.1                        | 21071                                    | ND                                | ND                                | No                  |
| CYTA                        | VKPQLEEK             | Yes                       | 324.19                         | 518.3                         | 6.41                                | 42.8                              | 17.1                        | 68589                                    | ND                                | ND                                | No                  |
| CYTB                        | HDELTYF              | No                        |                                |                               |                                     |                                   |                             |                                          |                                   |                                   |                     |
| CYTB                        | SQLEEK               | Yes                       | 367.19                         | 276.2                         | 5.62                                | 48.4                              | 21.7                        | 202094                                   | ND                                | ND                                | No                  |
| CYTB                        | SQLEEK               | Yes                       | 367.19                         | 405.2                         | 5.62                                | 48.4                              | 18.7                        | 104033                                   | ND                                | ND                                | No                  |
| CYTB                        | SQLEEK               | Yes                       | 367.19                         | 518.3                         | 5.62                                | 48.4                              | 15.7                        | 424574                                   | ND                                | ND                                | No                  |
| CYTB                        | SQLEEK               | Yes                       | 367.19                         | 646.3                         | 5.62                                | 48.4                              | 18.7                        | 21234                                    | ND                                | ND                                | No                  |
| CYTB                        | SQVVAGTNYFI K        | Yes                       | 663.86                         | 315.2                         | 14.75                               | 86.6                              | 31.7                        | 206912                                   | ND                                | ND                                | No                  |
| CYTB                        | SQVVAGTNYFI K        | Yes                       | 663.86                         | 414.2                         | 14.75                               | 86.6                              | 31.7                        | 42269                                    | ND                                | ND                                | No                  |
| CYTB                        | SQVVAGTNYFI K        | Yes                       | 663.86                         | 842.4                         | 14.75                               | 86.6                              | 31.7                        | 53227                                    | ND                                | ND                                | No                  |
| CYTB                        | SQVVAGTNYFI K        | Yes                       | 663.86                         | 913.5                         | 14.75                               | 86.6                              | 28.7                        | 63325                                    | ND                                | ND                                | No                  |

**Table S5.** MRM assay of individual proteins.

| Protein<br>(_HUMAN) | Peptide               | MS/MS<br>spectrum | Precursor ion<br>(m/z) | Fragment ion<br>(m/z) | Retention time<br>(minutes) | Declustering<br>potential | Collision<br>energy | Area of<br>synthetic<br>peptide | Area in control<br>sample | Area in disease<br>sample | Interference                           |
|---------------------|-----------------------|-------------------|------------------------|-----------------------|-----------------------------|---------------------------|---------------------|---------------------------------|---------------------------|---------------------------|----------------------------------------|
| CYTB                | VFQSLPHENKPLTLSNYQTNK | Yes               | 820.1                  | 362.2                 | 13.47                       | 106.8                     | 48.4                | 15542                           | ND                        | ND                        | No                                     |
| CYTB                | VFQSLPHENKPLTLSNYQTNK | Yes               | 820.1                  | 375.2                 | 13.47                       | 106.8                     | 45.4                | 10480                           | ND                        | ND                        | No                                     |
| CYTB                | VFQSLPHENKPLTLSNYQTNK | Yes               | 820.1                  | 462.2                 | 13.47                       | 106.8                     | 45.4                | 6202                            | ND                        | ND                        | No                                     |
| CYTB                | VFQSLPHENKPLTLSNYQTNK | Yes               | 820.1                  | 854.4                 | 13.47                       | 106.8                     | 39.4                | 6099                            | ND                        | ND                        | No                                     |
| CYTB                | VHVGDEDFVHLR          | Yes               | 474.91                 | 288.2                 | 13.27                       | 62.3                      | 27.8                | 14529                           | ND                        | ND                        | No                                     |
| CYTB                | VHVGDEDFVHLR          | Yes               | 474.91                 | 336.2                 | 13.27                       | 62.3                      | 24.8                | 14416                           | ND                        | ND                        | No                                     |
| CYTB                | VHVGDEDFVHLR          | Yes               | 474.91                 | 425.3                 | 13.27                       | 62.3                      | 27.8                | 40991                           | ND                        | ND                        | No                                     |
| CYTB                | VHVGDEDFVHLR          | Yes               | 474.91                 | 752.3                 | 13.27                       | 62.3                      | 21.8                | 5301                            | ND                        | ND                        | No                                     |
| DDX17               | DWVLNEFR              | Yes               | 539.77                 | 302.1                 | 19.61                       | 70.6                      | 23.2                | 158378                          | ND                        | ND                        | No                                     |
| DDX17               | DWVLNEFR              | Yes               | 539.77                 | 565.3                 | 19.61                       | 70.6                      | 26.2                | 48898                           | ND                        | ND                        | No                                     |
| DDX17               | DWVLNEFR              | Yes               | 539.77                 | 678.4                 | 19.61                       | 70.6                      | 26.2                | 89998                           | ND                        | ND                        | No                                     |
| DDX17               | DWVLNEFR              | Yes               | 539.77                 | 777.4                 | 19.61                       | 70.6                      | 23.2                | 77768                           | ND                        | ND                        | No                                     |
| DDX17               | FVINYDYPNSSSEDYVHR    | Yes               | 706.66                 | 312.2                 | 15.39                       | 92.2                      | 36.6                | 17514                           | 13345                     | 7552                      | No                                     |
| DDX17               | FVINYDYPNSSSEDYVHR    | Yes               | 706.66                 | 574.3                 | 15.39                       | 92.2                      | 42.6                | 30860                           | 9479                      | 12436                     | No                                     |
| DDX17               | FVINYDYPNSSSEDYVHR    | Yes               | 706.66                 | 752.4                 | 15.39                       | 92.2                      | 33.6                | 1742                            | ND                        | 371                       | No                                     |
| DDX17               | FVINYDYPNSSSEDYVHR    | Yes               | 706.66                 | 992.4                 | 15.39                       | 92.2                      | 36.6                | 6197                            | 512                       | ND                        | Yes (Based on<br>Transition<br>Ratios) |
| DDX17               | LIDFLESGK             | Yes               | 511.28                 | 420.2                 | 17.67                       | 67                        | 34                  | 34527                           | ND                        | ND                        | No                                     |
| DDX17               | LIDFLESGK             | Yes               | 511.28                 | 680.4                 | 17.67                       | 67                        | 28                  | 12355                           | ND                        | ND                        | No                                     |
| DDX17               | LIDFLESGK             | Yes               | 511.28                 | 795.4                 | 17.67                       | 67                        | 25                  | 113429                          | ND                        | ND                        | No                                     |
| DDX17               | LIDFLESGK             | Yes               | 511.28                 | 908.5                 | 17.67                       | 67                        | 25                  | 8800                            | ND                        | ND                        | No                                     |
| DDX17               | SSQSSSQQFSGIGR        | Yes               | 728.35                 | 489.3                 | 9.76                        | 95                        | 34.5                | 20963                           | ND                        | ND                        | No                                     |
| DDX17               | SSQSSSQQFSGIGR        | Yes               | 728.35                 | 636.3                 | 9.76                        | 95                        | 34.5                | 14095                           | ND                        | ND                        | No                                     |

**Table S5.** MRM assay of individual proteins.

| Protein<br>(_HUMAN) | Peptide         | MS/MS<br>spectrum | Precursor ion<br>(m/z) | Fragment ion<br>(m/z) | Retention time<br>(minutes) | Declustering<br>potential | Collision<br>energy | Area of<br>synthetic<br>peptide | Area in control<br>sample | Area in disease<br>sample | Interference |
|---------------------|-----------------|-------------------|------------------------|-----------------------|-----------------------------|---------------------------|---------------------|---------------------------------|---------------------------|---------------------------|--------------|
| DDX17               | SSQSSSQFSGIGR   | Yes               | 728.35                 | 764.4                 | 9.76                        | 95                        | 43.5                | 17394                           | ND                        | ND                        | No           |
| DDX17               | SSQSSSQFSGIGR   | Yes               | 728.35                 | 979.5                 | 9.76                        | 95                        | 43.5                | 14209                           | ND                        | ND                        | No           |
| DDX17               | VLEEANQAINPK    | Yes               | 663.36                 | 342.2                 | 9.86                        | 86.6                      | 31.7                | 87304                           | ND                        | ND                        | No           |
| DDX17               | VLEEANQAINPK    | Yes               | 663.36                 | 358.2                 | 9.86                        | 86.6                      | 31.7                | 241606                          | ND                        | ND                        | No           |
| DDX17               | VLEEANQAINPK    | Yes               | 663.36                 | 968.5                 | 9.86                        | 86.6                      | 31.7                | 12683                           | ND                        | ND                        | No           |
| DDX17               | VLEEANQAINPK    | Yes               | 663.36                 | 984.5                 | 9.86                        | 86.6                      | 31.7                | 43739                           | ND                        | ND                        | No           |
| DEFB1               | No peptide      |                   |                        |                       |                             |                           |                     |                                 |                           |                           |              |
| DESP                | IQSQFTDAQK      | Yes               | 583.3                  | 242.2                 | 10.90                       | 100                       | 31.2                | ND                              | 71370                     | ND                        | No           |
| DESP                | IQSQFTDAQK      | Yes               | 583.3                  | 562.3                 | 10.90                       | 100                       | 31.2                | ND                              | 4504                      | ND                        | No           |
| DESP                | IQSQFTDAQK      | Yes               | 583.3                  | 709.4                 | 10.90                       | 100                       | 31.2                | ND                              | 16893                     | ND                        | No           |
| DESP                | IQSQFTDAQK      | Yes               | 583.3                  | 924.4                 | 10.90                       | 100                       | 31.2                | ND                              | ND                        | ND                        | No           |
| DESP                | ITNLTQQLEQASIVK | Yes               | 843.5                  | 1015.6                | 20.10                       | 100                       | 42.6                | ND                              | ND                        | ND                        | No           |
| DESP                | ITNLTQQLEQASIVK | Yes               | 843.5                  | 1143.6                | 20.10                       | 100                       | 42.6                | ND                              | ND                        | ND                        | No           |
| DESP                | ITNLTQQLEQASIVK | Yes               | 843.5                  | 774.4                 | 20.10                       | 100                       | 42.6                | ND                              | ND                        | ND                        | No           |
| DESP                | ITNLTQQLEQASIVK | Yes               | 843.5                  | 887.5                 | 20.10                       | 100                       | 42.6                | ND                              | ND                        | ND                        | No           |
| DESP                | NMPLQHLLEQIK    | Yes               | 732.4                  | 1218.7                | 22.00                       | 100                       | 37.7                | ND                              | ND                        | ND                        | No           |
| DESP                | NMPLQHLLEQIK    | Yes               | 732.4                  | 609.9                 | 22.00                       | 100                       | 37.7                | ND                              | ND                        | ND                        | No           |
| DESP                | NMPLQHLLEQIK    | Yes               | 732.4                  | 630.4                 | 22.00                       | 100                       | 37.7                | ND                              | ND                        | ND                        | No           |
| DESP                | NMPLQHLLEQIK    | Yes               | 732.4                  | 880.5                 | 22.00                       | 100                       | 37.7                | ND                              | ND                        | ND                        | No           |
| DESP                | YGDGIQLTR       | Yes               | 511.767                | 221.093               | 10.50                       | 100                       | 28                  | ND                              | 41209                     | 28990                     | No           |
| DESP                | YGDGIQLTR       | Yes               | 511.767                | 687.415               | 10.50                       | 100                       | 34                  | ND                              | 8886                      | ND                        | No           |
| DESP                | YGDGIQLTR       | Yes               | 511.767                | 802.4                 | 10.50                       | 100                       | 28                  | ND                              | 2930                      | 1610                      | No           |
| DESP                | YGDGIQLTR       | Yes               | 511.767                | 859.5                 | 10.50                       | 100                       | 28                  | ND                              | ND                        | ND                        | No           |

**Table S5.** MRM assay of individual proteins.

| Protein<br>(_HUMAN) | Peptide              | MS/MS<br>spectrum | Precursor ion<br>(m/z) | Fragment ion<br>(m/z) | Retention time<br>(minutes) | Declustering<br>potential | Collision<br>energy | Area of<br>synthetic<br>peptide | Area in control<br>sample | Area in disease<br>sample | Interference |
|---------------------|----------------------|-------------------|------------------------|-----------------------|-----------------------------|---------------------------|---------------------|---------------------------------|---------------------------|---------------------------|--------------|
| DFB4A               | No peptide           |                   |                        |                       |                             |                           |                     |                                 |                           |                           |              |
| DHI1L               | ALPSLTDSK            | Yes               | 466.26                 | 349.2                 | 11.37                       | 61.1                      | 32                  | 76967                           | ND                        | ND                        | No           |
| DHI1L               | ALPSLTDSK            | Yes               | 466.26                 | 563.3                 | 11.37                       | 61.1                      | 32                  | 93018                           | ND                        | ND                        | No           |
| DHI1L               | ALPSLTDSK            | Yes               | 466.26                 | 650.3                 | 11.37                       | 61.1                      | 26                  | 134715                          | ND                        | ND                        | No           |
| DHI1L               | ALPSLTDSK            | Yes               | 466.26                 | 747.4                 | 11.37                       | 61.1                      | 23                  | 385131                          | 2454                      | 5438                      | No           |
| DHI1L               | GSLVTVVSSLLGR        | No                |                        |                       |                             |                           |                     |                                 |                           |                           |              |
| DHI1L               | LGGLDYLVLNHIGGAPAGTR | Yes               | 665.37                 | 456.2                 | 19.82                       | 86.8                      | 28.5                | 74912                           | ND                        | ND                        | No           |
| DHI1L               | LGGLDYLVLNHIGGAPAGTR | Yes               | 665.37                 | 686.4                 | 19.82                       | 86.8                      | 40.5                | 344370                          | ND                        | ND                        | No           |
| DHI1L               | LGGLDYLVLNHIGGAPAGTR | Yes               | 665.37                 | 799.4                 | 19.82                       | 86.8                      | 40.5                | 158863                          | ND                        | ND                        | No           |
| DHI1L               | LGGLDYLVLNHIGGAPAGTR | Yes               | 665.37                 | 936.5                 | 19.82                       | 86.8                      | 40.5                | 58319                           | ND                        | ND                        | No           |
| DHI1L               | NDGHLEPVTAWEVQVPR    | Yes               | 649.66                 | 272.2                 | 17.59                       | 84.8                      | 30.7                | 121144                          | 50070                     | 36516                     | No           |
| DHI1L               | NDGHLEPVTAWEVQVPR    | Yes               | 649.66                 | 598.4                 | 17.59                       | 84.8                      | 33.7                | 26378                           | 5013                      | 6152                      | No           |
| DHI1L               | NDGHLEPVTAWEVQVPR    | Yes               | 649.66                 | 727.4                 | 17.59                       | 84.8                      | 27.7                | 17353                           | ND                        | ND                        | No           |
| DHI1L               | NDGHLEPVTAWEVQVPR    | Yes               | 649.66                 | 913.5                 | 17.59                       | 84.8                      | 27.7                | 5969                            | ND                        | ND                        | No           |
| DHI1L               | VPTSFSTPYSAAK        | Yes               | 678.35                 | 532.3                 | 12.25                       | 88.5                      | 32.3                | 48478                           | ND                        | ND                        | No           |
| DHI1L               | VPTSFSTPYSAAK        | Yes               | 678.35                 | 636.3                 | 12.25                       | 88.5                      | 41.3                | 241729                          | ND                        | ND                        | No           |
| DHI1L               | VPTSFSTPYSAAK        | Yes               | 678.35                 | 824.4                 | 12.25                       | 88.5                      | 35.3                | 153089                          | ND                        | ND                        | No           |
| DHI1L               | VPTSFSTPYSAAK        | Yes               | 678.35                 | 971.5                 | 12.25                       | 88.5                      | 41.3                | 60933                           | ND                        | ND                        | No           |
| DMBT1               | FGQGSGPIVLDDVR       | Yes               | 730.38                 | 274.2                 | 15.09                       | 100                       | 37.6                | ND                              | ND                        | ND                        | No           |
| DMBT1               | FGQGSGPIVLDDVR       | Yes               | 730.38                 | 617.3                 | 15.09                       | 100                       | 37.6                | ND                              | ND                        | ND                        | No           |
| DMBT1               | FGQGSGPIVLDDVR       | Yes               | 730.38                 | 926.531               | 15.09                       | 100                       | 37.6                | ND                              | ND                        | ND                        | No           |
| DMBT1               | FGQGSGPIVLDDVR       | Yes               | 730.38                 | 983.553               | 15.09                       | 100                       | 34.6                | ND                              | ND                        | ND                        | No           |
| DMBT1               | INLGFSNLK            | Yes               | 503.291                | 228.135               | 15.50                       | 100                       | 24.6                | ND                              | ND                        | ND                        | No           |

**Table S5.** MRM assay of individual proteins.

| Protein<br>(_HUMAN) | Peptide           | MS/MS<br>spectrum | Precursor ion<br>(m/z) | Fragment ion<br>(m/z) | Retention time<br>(minutes) | Declustering<br>potential | Collision<br>energy | Area of<br>synthetic<br>peptide | Area in control<br>sample | Area in disease<br>sample | Interference |
|---------------------|-------------------|-------------------|------------------------|-----------------------|-----------------------------|---------------------------|---------------------|---------------------------------|---------------------------|---------------------------|--------------|
| DMBT1               | INLGFSNLK         | Yes               | 503.291                | 608.3                 | 15.50                       | 100                       | 27.6                | ND                              | ND                        | ND                        | No           |
| DMBT1               | INLGFSNLK         | Yes               | 503.291                | 665.362               | 15.50                       | 100                       | 24.6                | ND                              | ND                        | ND                        | No           |
| DMBT1               | INLGFSNLK         | Yes               | 503.291                | 778.4                 | 15.50                       | 100                       | 27.6                | ND                              | ND                        | ND                        | No           |
| DMBT1               | VDVVLGPIQLQTPPR   | Yes               | 816.5                  | 1049.6                | 22.60                       | 100                       | 41.4                | ND                              | ND                        | ND                        | No           |
| DMBT1               | VDVVLGPIQLQTPPR   | Yes               | 816.5                  | 1106.6                | 22.60                       | 100                       | 41.4                | ND                              | ND                        | ND                        | No           |
| DMBT1               | VDVVLGPIQLQTPPR   | Yes               | 816.5                  | 1219.7                | 22.60                       | 100                       | 41.4                | ND                              | ND                        | ND                        | No           |
| DMBT1               | VDVVLGPIQLQTPPR   | Yes               | 816.5                  | 369.2                 | 22.60                       | 100                       | 41.4                | ND                              | ND                        | ND                        | No           |
| DMKN                | GGVSPSSASR        | No                |                        |                       |                             |                           |                     |                                 |                           |                           |              |
| DMKN                | LGFINWDANK        | No                |                        |                       |                             |                           |                     |                                 |                           |                           |              |
| DMKN                | QVPGFGVADALGNR    | Yes               | 700.87                 | 346.2                 | 16.42                       | 91.4                      | 36.3                | 13044                           | ND                        | ND                        | No           |
| DMKN                | QVPGFGVADALGNR    | Yes               | 700.87                 | 530.3                 | 16.42                       | 91.4                      | 42.3                | 44882                           | ND                        | ND                        | No           |
| DMKN                | QVPGFGVADALGNR    | Yes               | 700.87                 | 645.3                 | 16.42                       | 91.4                      | 42.3                | 11449                           | ND                        | ND                        | No           |
| DMKN                | QVPGFGVADALGNR    | Yes               | 700.87                 | 872.5                 | 16.42                       | 91.4                      | 36.3                | 12328                           | ND                        | ND                        | No           |
| DMKN                | VGEAAHALGNTGHEIGR | Yes               | 563.62                 | 286.1                 | 9.09                        | 73.7                      | 35.3                | 9951                            | ND                        | ND                        | No           |
| DMKN                | VGEAAHALGNTGHEIGR | Yes               | 563.62                 | 474.3                 | 9.09                        | 73.7                      | 32.3                | 19401                           | ND                        | ND                        | No           |
| DMKN                | VGEAAHALGNTGHEIGR | Yes               | 563.62                 | 611.3                 | 9.09                        | 73.7                      | 35.3                | 7755                            | ND                        | ND                        | No           |
| DMKN                | VGEAAHALGNTGHEIGR | Yes               | 563.62                 | 668.3                 | 9.09                        | 73.7                      | 35.3                | 6808                            | ND                        | ND                        | No           |
| DMKN                | VSEALGQGTR        | Yes               | 509.27                 | 631.4                 | 7.11                        | 66.7                      | 24.9                | 73307                           | ND                        | ND                        | No           |
| DMKN                | VSEALGQGTR        | Yes               | 509.27                 | 702.4                 | 7.11                        | 66.7                      | 27.9                | 60628                           | ND                        | ND                        | No           |
| DMKN                | VSEALGQGTR        | Yes               | 509.27                 | 831.4                 | 7.11                        | 66.7                      | 24.9                | 57457                           | ND                        | ND                        | No           |
| DMKN                | VSEALGQGTR        | Yes               | 509.27                 | 918.5                 | 7.11                        | 66.7                      | 33.9                | 38564                           | ND                        | ND                        | No           |
| DPP4                | LGTFEVEDQIEAAR    | Yes               | 789.4                  | 1030.5                | 18.70                       | 100                       | 40.2                | ND                              | 14706                     | 16193                     | No           |
| DPP4                | LGTFEVEDQIEAAR    | Yes               | 789.4                  | 446.2                 | 18.70                       | 100                       | 40.2                | ND                              | 9761                      | 14262                     | No           |

**Table S5.** MRM assay of individual proteins.

| Protein<br>(_HUMAN) | Peptide        | MS/MS<br>spectrum | Precursor ion<br>(m/z) | Fragment ion<br>(m/z) | Retention time<br>(minutes) | Decustering<br>potential | Collision<br>energy | Area of<br>synthetic<br>peptide | Area in control<br>sample | Area in disease<br>sample | Interference |
|---------------------|----------------|-------------------|------------------------|-----------------------|-----------------------------|--------------------------|---------------------|---------------------------------|---------------------------|---------------------------|--------------|
| DPP4                | LGTFEVEDQIEAAR | Yes               | 789.4                  | 802.4                 | 18.70                       | 100                      | 40.2                | ND                              | 13413                     | 9179                      | No           |
| DPP4                | LGTFEVEDQIEAAR | Yes               | 789.4                  | 931.4                 | 18.70                       | 100                      | 40.2                | ND                              | 17430                     | 16865                     | No           |
| DPP4                | MLQNVQMPSK     | Yes               | 588.3                  | 331.2                 | 13.70                       | 100                      | 31.4                | ND                              | ND                        | ND                        | No           |
| DPP4                | MLQNVQMPSK     | Yes               | 588.3                  | 462.2                 | 13.70                       | 100                      | 31.4                | ND                              | ND                        | ND                        | No           |
| DPP4                | MLQNVQMPSK     | Yes               | 588.3                  | 803.4                 | 13.70                       | 100                      | 31.4                | ND                              | ND                        | ND                        | No           |
| DPP4                | MLQNVQMPSK     | Yes               | 588.3                  | 931.5                 | 13.70                       | 100                      | 31.4                | ND                              | ND                        | ND                        | No           |
| DPP4                | WEYYDSVYTER    | Yes               | 755.8                  | 1032.5                | 14.13                       | 100                      | 38.8                | ND                              | ND                        | ND                        | No           |
| DPP4                | WEYYDSVYTER    | Yes               | 755.8                  | 1195.5                | 14.13                       | 100                      | 32.8                | ND                              | ND                        | ND                        | No           |
| DPP4                | WEYYDSVYTER    | Yes               | 755.8                  | 316.1                 | 14.13                       | 100                      | 35.8                | ND                              | ND                        | ND                        | No           |
| DPP4                | WEYYDSVYTER    | Yes               | 755.8                  | 869.4                 | 14.13                       | 100                      | 38.8                | ND                              | ND                        | ND                        | No           |
| DPP4                | WISDHEYLYK     | Yes               | 451.9                  | 310.2                 | 13.21                       | 100                      | 23.5                | ND                              | ND                        | ND                        | No           |
| DPP4                | WISDHEYLYK     | Yes               | 451.9                  | 423.3                 | 13.21                       | 100                      | 23.5                | ND                              | ND                        | ND                        | No           |
| DPP4                | WISDHEYLYK     | Yes               | 451.9                  | 426.7                 | 13.21                       | 100                      | 23.5                | ND                              | ND                        | ND                        | No           |
| DPP4                | WISDHEYLYK     | Yes               | 451.9                  | 586.3                 | 13.21                       | 100                      | 23.5                | ND                              | ND                        | ND                        | No           |
| DPP4                | WISDHEYLYK     | Yes               | 677.3                  | 1054.5                | 13.21                       | 100                      | 35.3                | ND                              | ND                        | ND                        | No           |
| DPP4                | WISDHEYLYK     | Yes               | 677.3                  | 527.7                 | 13.21                       | 100                      | 35.3                | ND                              | ND                        | ND                        | No           |
| DPP4                | WISDHEYLYK     | Yes               | 677.3                  | 584.3                 | 13.21                       | 100                      | 35.3                | ND                              | ND                        | ND                        | No           |
| DPP4                | WISDHEYLYK     | Yes               | 677.3                  | 852.4                 | 13.21                       | 100                      | 35.3                | ND                              | ND                        | ND                        | No           |
| DPP4                | YMGLTPEDNLDHYR | Yes               | 607.6                  | 295.1                 | 18.40                       | 100                      | 31.5                | ND                              | ND                        | ND                        | No           |
| DPP4                | YMGLTPEDNLDHYR | Yes               | 607.6                  | 352.1                 | 18.40                       | 100                      | 31.5                | ND                              | ND                        | ND                        | No           |
| DPP4                | YMGLTPEDNLDHYR | Yes               | 607.6                  | 579.8                 | 18.40                       | 100                      | 31.5                | ND                              | ND                        | ND                        | No           |
| DPP4                | YMGLTPEDNLDHYR | Yes               | 910.9                  | 1158.5                | 18.40                       | 100                      | 45.6                | ND                              | ND                        | ND                        | No           |
| DPP4                | YMGLTPEDNLDHYR | Yes               | 910.9                  | 352.1                 | 18.40                       | 100                      | 45.6                | ND                              | ND                        | ND                        | No           |

**Table S5.** MRM assay of individual proteins.

| Protein<br>(_HUMAN) | Peptide                  | MS/MS<br>spectrum | Precursor ion<br>(m/z) | Fragment ion<br>(m/z) | Retention time<br>(minutes) | Decustering<br>potential | Collision<br>energy | Area of<br>synthetic<br>peptide | Area in control<br>sample | Area in disease<br>sample | Interference |
|---------------------|--------------------------|-------------------|------------------------|-----------------------|-----------------------------|--------------------------|---------------------|---------------------------------|---------------------------|---------------------------|--------------|
| DPP4                | YMGLTPEDNLDHYR           | Yes               | 910.9                  | 678.8                 | 18.40                       | 100                      | 45.6                | ND                              | ND                        | ND                        | No           |
| DSG2                | GNNVEKPLELR              | No                |                        |                       |                             |                          |                     |                                 |                           |                           |              |
| DSG2                | GQIIGNFQAFDEDTGLPAHAR    | Yes               | 753.04                 | 299.2                 | 18.19                       | 98.1                     | 33                  | 59741                           | 26553                     | 40065                     | No           |
| DSG2                | GQIIGNFQAFDEDTGLPAHAR    | Yes               | 753.04                 | 551.3                 | 18.19                       | 98.1                     | 42                  | 60555                           | 22581                     | 16687                     | No           |
| DSG2                | GQIIGNFQAFDEDTGLPAHAR    | Yes               | 753.04                 | 721.4                 | 18.19                       | 98.1                     | 33                  | 4877                            | ND                        | ND                        | No           |
| DSG2                | GQIIGNFQAFDEDTGLPAHAR    | Yes               | 753.04                 | 937.5                 | 18.19                       | 98.1                     | 42                  | 4335                            | ND                        | ND                        | No           |
| DSG2                | ILDVNDNIPVVENK           | Yes               | 791.43                 | 342.2                 | 15.34                       | 103.1                    | 43.3                | 159085                          | 11428                     | 15120                     | No           |
| DSG2                | ILDVNDNIPVVENK           | Yes               | 791.43                 | 489.3                 | 15.34                       | 103.1                    | 37.3                | 43864                           | ND                        | 3260                      | No           |
| DSG2                | ILDVNDNIPVVENK           | Yes               | 791.43                 | 685.4                 | 15.34                       | 103.1                    | 46.3                | 188161                          | 9363                      | 13092                     | No           |
| DSG2                | ILDVNDNIPVVENK           | Yes               | 791.43                 | 897.5                 | 15.34                       | 103.1                    | 34.3                | 33601                           | ND                        | ND                        | No           |
| DSG2                | NLDFSVIVANK              | Yes               | 610.34                 | 431.3                 | 17.88                       | 79.7                     | 35.4                | 95923                           | ND                        | ND                        | No           |
| DSG2                | NLDFSVIVANK              | Yes               | 610.34                 | 730.4                 | 17.88                       | 79.7                     | 29.4                | 60999                           | ND                        | ND                        | No           |
| DSG2                | NLDFSVIVANK              | Yes               | 610.34                 | 877.5                 | 17.88                       | 79.7                     | 29.4                | 45163                           | ND                        | ND                        | No           |
| DSG2                | NLDFSVIVANK              | Yes               | 610.34                 | 992.5                 | 17.88                       | 79.7                     | 29.4                | 91436                           | ND                        | ND                        | No           |
| DSG2                | VYAPASTLVDQPYANEGTVVVTER | Yes               | 860.44                 | 405.2                 | 16.59                       | 112                      | 41.4                | 9975                            | ND                        | ND                        | No           |
| DSG2                | VYAPASTLVDQPYANEGTVVVTER | Yes               | 860.44                 | 504.3                 | 16.59                       | 112                      | 44.4                | 11474                           | ND                        | ND                        | No           |
| DSG2                | VYAPASTLVDQPYANEGTVVVTER | Yes               | 860.44                 | 603.3                 | 16.59                       | 112                      | 38.4                | 7390                            | ND                        | ND                        | No           |
| DSG2                | VYAPASTLVDQPYANEGTVVVTER | Yes               | 860.44                 | 702.4                 | 16.59                       | 112                      | 38.4                | 3740                            | ND                        | ND                        | No           |
| DX39A               | DFLLKPELLR               | Yes               | 415.25                 | 288.2                 | 19.46                       | 54.6                     | 27.7                | 5684                            | ND                        | ND                        | No           |
| DX39A               | DFLLKPELLR               | Yes               | 415.25                 | 530.3                 | 19.46                       | 54.6                     | 27.7                | 18948                           | ND                        | ND                        | No           |
| DX39A               | DFLLKPELLR               | Yes               | 415.25                 | 627.4                 | 19.46                       | 54.6                     | 24.7                | 255482                          | ND                        | ND                        | No           |
| DX39A               | DFLLKPELLR               | Yes               | 415.25                 | 755.5                 | 19.46                       | 54.6                     | 27.7                | 31238                           | ND                        | ND                        | No           |
| DX39A               | FEVNV AELPEEIDISTYIEQSR  | Yes               | 861.09                 | 519.3                 | 24.28                       | 112.1                    | 41.5                | 6595                            | ND                        | ND                        | No           |

**Table S5.** MRM assay of individual proteins.

| Protein<br>(_HUMAN) | Peptide                | MS/MS<br>spectrum | Precursor ion<br>(m/z) | Fragment ion<br>(m/z) | Retention time<br>(minutes) | Decustering<br>potential | Collision<br>energy | Area of<br>synthetic<br>peptide | Area in control<br>sample | Area in disease<br>sample | Interference |
|---------------------|------------------------|-------------------|------------------------|-----------------------|-----------------------------|--------------------------|---------------------|---------------------------------|---------------------------|---------------------------|--------------|
| DX39A               | FEVNVAELPEEIDISTYIEQSR | Yes               | 861.09                 | 795.4                 | 24.28                       | 112.1                    | 41.5                | 7402                            | ND                        | ND                        | No           |
| DX39A               | FEVNVAELPEEIDISTYIEQSR | Yes               | 861.09                 | 896.4                 | 24.28                       | 112.1                    | 38.5                | 3400                            | ND                        | ND                        | No           |
| DX39A               | FEVNVAELPEEIDISTYIEQSR | Yes               | 861.09                 | 983.5                 | 24.28                       | 112.1                    | 38.5                | 7487                            | ND                        | ND                        | No           |
| DX39A               | GLAITFVSDENDAK         | No                |                        |                       |                             |                          |                     |                                 |                           |                           |              |
| DX39A               | ILNDVQDR               | Yes               | 486.76                 | 418.2                 | 8.34                        | 63.8                     | 26.9                | 6350                            | ND                        | ND                        | No           |
| DX39A               | ILNDVQDR               | Yes               | 486.76                 | 632.3                 | 8.34                        | 63.8                     | 32.9                | 5435                            | ND                        | ND                        | No           |
| DX39A               | ILNDVQDR               | Yes               | 486.76                 | 746.3                 | 8.34                        | 63.8                     | 23.9                | 32212                           | ND                        | ND                        | No           |
| DX39A               | ILNDVQDR               | Yes               | 486.76                 | 859.4                 | 8.34                        | 63.8                     | 29.9                | 4830                            | ND                        | ND                        | No           |
| DX39A               | LTPHEK                 | Yes               | 362.7                  | 276.2                 | 5.35                        | 47.8                     | 27.5                | 79705                           | ND                        | ND                        | No           |
| DX39A               | LTPHEK                 | Yes               | 362.7                  | 413.2                 | 5.35                        | 47.8                     | 24.5                | 183462                          | ND                        | ND                        | No           |
| DX39A               | LTPHEK                 | Yes               | 362.7                  | 510.3                 | 5.35                        | 47.8                     | 18.5                | 739789                          | ND                        | ND                        | No           |
| DX39A               | LTPHEK                 | Yes               | 362.7                  | 611.3                 | 5.35                        | 47.8                     | 18.5                | 52986                           | ND                        | ND                        | No           |
| DX39B               | DFLLKPELLR             | Yes               | 415.25                 | 288.2                 | 19.46                       | 54.6                     | 27.7                | 5684                            | ND                        | ND                        | No           |
| DX39B               | DFLLKPELLR             | Yes               | 415.25                 | 530.3                 | 19.46                       | 54.6                     | 27.7                | 18948                           | ND                        | ND                        | No           |
| DX39B               | DFLLKPELLR             | Yes               | 415.25                 | 627.4                 | 19.46                       | 54.6                     | 24.7                | 255482                          | ND                        | ND                        | No           |
| DX39B               | DFLLKPELLR             | Yes               | 415.25                 | 755.5                 | 19.46                       | 54.6                     | 27.7                | 31238                           | ND                        | ND                        | No           |
| DX39B               | ELAFQISK               | Yes               | 468.26                 | 347.2                 | 14.16                       | 61.4                     | 23.1                | 406175                          | ND                        | ND                        | No           |
| DX39B               | ELAFQISK               | Yes               | 468.26                 | 622.4                 | 14.16                       | 61.4                     | 23.1                | 174446                          | ND                        | ND                        | No           |
| DX39B               | ELAFQISK               | Yes               | 468.26                 | 693.4                 | 14.16                       | 61.4                     | 23.1                | 214847                          | ND                        | ND                        | No           |
| DX39B               | ELAFQISK               | Yes               | 468.26                 | 806.5                 | 14.16                       | 61.4                     | 23.1                | 6359                            | ND                        | ND                        | No           |
| DX39B               | FEVNISELPDEIDISSYIEQTR | Yes               | 866.43                 | 277.1                 | 24.29                       | 112.8                    | 50.7                | 9373                            | ND                        | ND                        | No           |
| DX39B               | FEVNISELPDEIDISSYIEQTR | Yes               | 866.43                 | 646.4                 | 24.29                       | 112.8                    | 38.7                | 7591                            | ND                        | ND                        | No           |
| DX39B               | FEVNISELPDEIDISSYIEQTR | Yes               | 866.43                 | 809.4                 | 24.29                       | 112.8                    | 41.7                | 7252                            | ND                        | ND                        | No           |



**Table S5.** MRM assay of individual proteins.

| Protein<br>(_HUMAN) | Peptide                | MS/MS<br>spectrum | Precursor ion<br>(m/z) | Fragment ion<br>(m/z) | Retention time<br>(minutes) | Declustering<br>potential | Collision<br>energy | Area of<br>synthetic<br>peptide | Area in control<br>sample | Area in disease<br>sample | Interference |
|---------------------|------------------------|-------------------|------------------------|-----------------------|-----------------------------|---------------------------|---------------------|---------------------------------|---------------------------|---------------------------|--------------|
| DX39B               | FEVNISELPDEIDISSYIEQTR | Yes               | 866.43                 | 983.5                 | 24.29                       | 112.8                     | 44.7                | 7151                            | ND                        | ND                        | No           |
| DX39B               | GLAITFVSDENDAK         | No                |                        |                       |                             |                           |                     |                                 |                           |                           |              |
| DX39B               | ILNDVQDR               | Yes               | 486.76                 | 418.2                 | 8.34                        | 63.8                      | 26.9                | 6350                            | ND                        | ND                        | No           |
| DX39B               | ILNDVQDR               | Yes               | 486.76                 | 632.3                 | 8.34                        | 63.8                      | 32.9                | 5435                            | ND                        | ND                        | No           |
| DX39B               | ILNDVQDR               | Yes               | 486.76                 | 746.3                 | 8.34                        | 63.8                      | 23.9                | 32212                           | ND                        | ND                        | No           |
| DX39B               | ILNDVQDR               | Yes               | 486.76                 | 859.4                 | 8.34                        | 63.8                      | 29.9                | 4830                            | ND                        | ND                        | No           |
| DYRK2               | APEVILGAR              | Yes               | 463.28                 | 416.3                 | 11.68                       | 60.8                      | 28.9                | 77747                           | ND                        | ND                        | No           |
| DYRK2               | APEVILGAR              | Yes               | 463.28                 | 529.3                 | 11.68                       | 60.8                      | 25.9                | 87960                           | ND                        | ND                        | No           |
| DYRK2               | APEVILGAR              | Yes               | 463.28                 | 628.4                 | 11.68                       | 60.8                      | 31.9                | 57507                           | ND                        | ND                        | No           |
| DYRK2               | APEVILGAR              | Yes               | 463.28                 | 757.5                 | 11.68                       | 60.8                      | 31.9                | 57830                           | ND                        | ND                        | No           |
| DYRK2               | ASNAAAAAHTIGGSK        | Yes               | 663.84                 | 770.4                 | 6.85                        | 86.6                      | 31.7                | 3171                            | ND                        | ND                        | No           |
| DYRK2               | ASNAAAAAHTIGGSK        | Yes               | 663.84                 | 841.5                 | 6.85                        | 86.6                      | 34.7                | 6161                            | ND                        | ND                        | No           |
| DYRK2               | ASNAAAAAHTIGGSK        | Yes               | 663.84                 | 912.5                 | 6.85                        | 86.6                      | 37.7                | 7032                            | ND                        | ND                        | No           |
| DYRK2               | ASNAAAAAHTIGGSK        | Yes               | 663.84                 | 983.5                 | 6.85                        | 86.6                      | 40.7                | 3956                            | ND                        | ND                        | No           |
| DYRK2               | QLQASPGLGAGATR         | Yes               | 663.86                 | 528.3                 | 9.48                        | 86.6                      | 31.7                | 15578                           | ND                        | ND                        | No           |
| DYRK2               | QLQASPGLGAGATR         | Yes               | 663.86                 | 799.4                 | 9.48                        | 86.6                      | 34.7                | 75614                           | ND                        | ND                        | No           |
| DYRK2               | QLQASPGLGAGATR         | Yes               | 663.86                 | 886.5                 | 9.48                        | 86.6                      | 37.7                | 24031                           | ND                        | ND                        | No           |
| DYRK2               | QLQASPGLGAGATR         | Yes               | 663.86                 | 957.5                 | 9.48                        | 86.6                      | 40.7                | 17358                           | ND                        | ND                        | No           |
| DYRK2               | SGVGTGPPSPIALPPLR      | Yes               | 808.46                 | 402.2                 | 17.86                       | 105.3                     | 38.1                | 23000                           | ND                        | ND                        | No           |
| DYRK2               | SGVGTGPPSPIALPPLR      | Yes               | 808.46                 | 482.3                 | 17.86                       | 105.3                     | 38.1                | 268169                          | ND                        | ND                        | No           |
| DYRK2               | SGVGTGPPSPIALPPLR      | Yes               | 808.46                 | 595.4                 | 17.86                       | 105.3                     | 41.1                | 24024                           | ND                        | ND                        | No           |
| DYRK2               | SGVGTGPPSPIALPPLR      | Yes               | 808.46                 | 876.6                 | 17.86                       | 105.3                     | 47.1                | 46280                           | ND                        | ND                        | No           |
| DYRK2               | TGLPVVPER              | Yes               | 484.28                 | 304.2                 | 11.77                       | 63.5                      | 32.8                | 1150                            | ND                        | ND                        | No           |

**Table S5.** MRM assay of individual proteins.

| Protein<br>(_HUMAN) | Peptide                | MS/MS<br>spectrum | Precursor ion<br>(m/z) | Fragment ion<br>(m/z) | Retention time<br>(minutes) | Declustering<br>potential | Collision<br>energy | Area of<br>synthetic<br>peptide | Area in control<br>sample | Area in disease<br>sample | Interference |
|---------------------|------------------------|-------------------|------------------------|-----------------------|-----------------------------|---------------------------|---------------------|---------------------------------|---------------------------|---------------------------|--------------|
| DYRK2               | TGLPVVPER              | Yes               | 484.28                 | 401.2                 | 11.77                       | 63.5                      | 32.8                | 87032                           | ND                        | ND                        | No           |
| DYRK2               | TGLPVVPER              | Yes               | 484.28                 | 599.4                 | 11.77                       | 63.5                      | 32.8                | 21439                           | ND                        | ND                        | No           |
| DYRK2               | TGLPVVPER              | Yes               | 484.28                 | 696.4                 | 11.77                       | 63.5                      | 23.8                | 77098                           | ND                        | ND                        | No           |
| EDN2                | GQAAATLEQPASSSHAQGTHLR | Yes               | 740.04                 | 257.1                 | 8.49                        | 96.5                      | 35.3                | 7803                            | ND                        | ND                        | No           |
| EDN2                | GQAAATLEQPASSSHAQGTHLR | Yes               | 740.04                 | 328.2                 | 8.49                        | 96.5                      | 35.3                | 3101                            | ND                        | ND                        | No           |
| EDN2                | GQAAATLEQPASSSHAQGTHLR | Yes               | 740.04                 | 399.2                 | 8.49                        | 96.5                      | 32.3                | 3119                            | ND                        | ND                        | No           |
| EDN2                | GQAAATLEQPASSSHAQGTHLR | Yes               | 740.04                 | 583.3                 | 8.49                        | 96.5                      | 41.3                | 1956                            | ND                        | ND                        | No           |
| EDN2                | TGATTGELLQR            | Yes               | 573.81                 | 416.3                 | 10.56                       | 75                        | 30.7                | 17219                           | ND                        | ND                        | No           |
| EDN2                | TGATTGELLQR            | Yes               | 573.81                 | 715.4                 | 10.56                       | 75                        | 36.7                | 48380                           | ND                        | ND                        | No           |
| EDN2                | TGATTGELLQR            | Yes               | 573.81                 | 816.5                 | 10.56                       | 75                        | 27.7                | 40807                           | ND                        | ND                        | No           |
| EDN2                | TGATTGELLQR            | Yes               | 573.81                 | 917.5                 | 10.56                       | 75                        | 36.7                | 12458                           | ND                        | ND                        | No           |
| EF1A1               | EHALLAYTLGVK           | Yes               | 438.92                 | 517.3                 | 18.30                       | 57.6                      | 19.9                | 282452                          | ND                        | ND                        | No           |
| EF1A1               | EHALLAYTLGVK           | Yes               | 438.92                 | 564.3                 | 18.30                       | 57.6                      | 19.9                | 467029                          | ND                        | ND                        | No           |
| EF1A1               | EHALLAYTLGVK           | Yes               | 438.92                 | 635.4                 | 18.30                       | 57.6                      | 19.9                | 542339                          | ND                        | ND                        | No           |
| EF1A1               | EHALLAYTLGVK           | Yes               | 438.92                 | 680.4                 | 18.30                       | 57.6                      | 19.9                | 469927                          | ND                        | ND                        | No           |
| EF1A1               | IGGIGTVPVGR            | Yes               | 513.31                 | 428.3                 | 13.61                       | 67.2                      | 25.1                | 1279522                         | 166904                    | 126364                    | No           |
| EF1A1               | IGGIGTVPVGR            | Yes               | 513.31                 | 628.4                 | 13.61                       | 67.2                      | 25.1                | 302840                          | 110651                    | 83854                     | No           |
| EF1A1               | IGGIGTVPVGR            | Yes               | 513.31                 | 685.4                 | 13.61                       | 67.2                      | 25.1                | 1565234                         | 48256                     | 53207                     | No           |
| EF1A1               | IGGIGTVPVGR            | Yes               | 513.31                 | 912.5                 | 13.61                       | 67.2                      | 34.1                | 309703                          | 11997                     | 5702                      | No           |
| EF1A1               | LPLQDVYK               | Yes               | 488.28                 | 524.3                 | 15.00                       | 64                        | 33                  | 307378                          | ND                        | ND                        | No           |
| EF1A1               | LPLQDVYK               | Yes               | 488.28                 | 652.3                 | 15.00                       | 64                        | 33                  | 513178                          | ND                        | ND                        | No           |
| EF1A1               | LPLQDVYK               | Yes               | 488.28                 | 765.4                 | 15.00                       | 64                        | 27                  | 911992                          | ND                        | ND                        | No           |
| EF1A1               | LPLQDVYK               | Yes               | 488.28                 | 862.5                 | 15.00                       | 64                        | 24                  | 789437                          | ND                        | ND                        | No           |

**Table S5.** MRM assay of individual proteins.

| Protein<br>(_HUMAN) | Peptide                   | MS/MS<br>spectrum | Precursor ion<br>(m/z) | Fragment ion<br>(m/z) | Retention time<br>(minutes) | Declustering<br>potential | Collision<br>energy | Area of<br>synthetic<br>peptide | Area in control<br>sample | Area in disease<br>sample | Interference |
|---------------------|---------------------------|-------------------|------------------------|-----------------------|-----------------------------|---------------------------|---------------------|---------------------------------|---------------------------|---------------------------|--------------|
| EF1A1               | MDSTEPPYSQK               | Yes               | 641.78                 | 334.1                 | 8.81                        | 83.8                      | 30.7                | 196746                          | ND                        | ND                        | No           |
| EF1A1               | MDSTEPPYSQK               | Yes               | 641.78                 | 362.2                 | 8.81                        | 83.8                      | 39.7                | 193866                          | ND                        | ND                        | No           |
| EF1A1               | MDSTEPPYSQK               | Yes               | 641.78                 | 719.4                 | 8.81                        | 83.8                      | 30.7                | 1652112                         | ND                        | ND                        | No           |
| EF1A1               | MDSTEPPYSQK               | Yes               | 641.78                 | 848.4                 | 8.81                        | 83.8                      | 30.7                | 187924                          | ND                        | ND                        | No           |
| EF1A1               | QTVAVGVK                  | Yes               | 457.79                 | 416.3                 | 12.59                       | 60.1                      | 22.6                | 1717888                         | ND                        | ND                        | No           |
| EF1A1               | QTVAVGVK                  | Yes               | 457.79                 | 515.4                 | 12.59                       | 60.1                      | 25.6                | 628376                          | ND                        | ND                        | No           |
| EF1A1               | QTVAVGVK                  | Yes               | 457.79                 | 586.4                 | 12.59                       | 60.1                      | 25.6                | 1088864                         | ND                        | ND                        | No           |
| EF1A1               | QTVAVGVK                  | Yes               | 457.79                 | 685.5                 | 12.59                       | 60.1                      | 25.6                | 582848                          | ND                        | ND                        | No           |
| EF1A1               | STTTGHLIYK                | Yes               | 560.8                  | 310.2                 | 10.10                       | 73.3                      | 36.2                | 1142965                         | ND                        | ND                        | No           |
| EF1A1               | STTTGHLIYK                | Yes               | 560.8                  | 730.4                 | 10.10                       | 73.3                      | 36.2                | 406164                          | ND                        | ND                        | No           |
| EF1A1               | STTTGHLIYK                | Yes               | 560.8                  | 831.5                 | 10.10                       | 73.3                      | 33.2                | 679393                          | ND                        | ND                        | No           |
| EF1A1               | STTTGHLIYK                | Yes               | 560.8                  | 932.5                 | 10.10                       | 73.3                      | 30.2                | 592464                          | ND                        | ND                        | No           |
| EF1A1               | THINIVVIGHVDSGK           | Yes               | 530.3                  | 579.3                 | 15.10                       | 69.4                      | 27.6                | 196084                          | ND                        | ND                        | No           |
| EF1A1               | THINIVVIGHVDSGK           | Yes               | 530.3                  | 678.4                 | 15.10                       | 69.4                      | 27.6                | 86371                           | ND                        | ND                        | No           |
| EF1A1               | THINIVVIGHVDSGK           | Yes               | 530.3                  | 699.3                 | 15.10                       | 69.4                      | 27.6                | 134502                          | ND                        | ND                        | No           |
| EF1A1               | THINIVVIGHVDSGK           | Yes               | 530.3                  | 812.4                 | 15.10                       | 69.4                      | 24.6                | 86539                           | ND                        | ND                        | No           |
| EF1A1               | VETGVLKPGMVVTFAPVNVTTTEVK | No                |                        |                       |                             |                           |                     |                                 |                           |                           |              |
| EF1A1               | YAWVLDK                   | Yes               | 447.74                 | 375.2                 | 17.35                       | 58.8                      | 31.2                | 479314                          | ND                        | ND                        | No           |
| EF1A1               | YAWVLDK                   | Yes               | 447.74                 | 474.3                 | 17.35                       | 58.8                      | 31.2                | 190801                          | ND                        | ND                        | No           |
| EF1A1               | YAWVLDK                   | Yes               | 447.74                 | 660.4                 | 17.35                       | 58.8                      | 22.2                | 885828                          | ND                        | ND                        | No           |
| EF1A1               | YAWVLDK                   | Yes               | 447.74                 | 731.4                 | 17.35                       | 58.8                      | 22.2                | 289406                          | ND                        | ND                        | No           |
| EF1A1               | YYVTIIDAPGHR              | Yes               | 702.87                 | 537.3                 | 15.85                       | 91.7                      | 42.4                | 324122                          | ND                        | ND                        | No           |
| EF1A1               | YYVTIIDAPGHR              | Yes               | 702.87                 | 652.3                 | 15.85                       | 91.7                      | 42.4                | 119764                          | ND                        | ND                        | No           |

**Table S5.** MRM assay of individual proteins.

| Protein<br>(_HUMAN) | Peptide         | MS/MS<br>spectrum | Precursor ion<br>(m/z) | Fragment ion<br>(m/z) | Retention time<br>(minutes) | Decustering<br>potential | Collision<br>energy | Area of<br>synthetic<br>peptide | Area in control<br>sample | Area in disease<br>sample | Interference |
|---------------------|-----------------|-------------------|------------------------|-----------------------|-----------------------------|--------------------------|---------------------|---------------------------------|---------------------------|---------------------------|--------------|
| EF1A1               | YYVTIIDAPGHR    | Yes               | 702.87                 | 765.4                 | 15.85                       | 91.7                     | 33.4                | 255891                          | ND                        | ND                        | No           |
| EF1A1               | YYVTIIDAPGHR    | Yes               | 702.87                 | 979.5                 | 15.85                       | 91.7                     | 33.4                | 123113                          | ND                        | ND                        | No           |
| EF1D                | FEEHVQSVDIAAFNK | No                |                        |                       |                             |                          |                     |                                 |                           |                           |              |
| EF1D                | GVVQELQQAISK    | Yes               | 650.37                 | 513.3                 | 19.83                       | 84.9                     | 34.1                | 14649                           | ND                        | ND                        | No           |
| EF1D                | GVVQELQQAISK    | Yes               | 650.37                 | 674.4                 | 19.83                       | 84.9                     | 31.1                | 21091                           | ND                        | ND                        | No           |
| EF1D                | GVVQELQQAISK    | Yes               | 650.37                 | 787.5                 | 19.83                       | 84.9                     | 31.1                | 28300                           | ND                        | ND                        | No           |
| EF1D                | GVVQELQQAISK    | Yes               | 650.37                 | 916.5                 | 19.83                       | 84.9                     | 31.1                | 25870                           | ND                        | ND                        | No           |
| EF1D                | LNVLEK          | Yes               | 358.22                 | 276.2                 | 10.10                       | 47.2                     | 24.3                | 410865                          | ND                        | ND                        | No           |
| EF1D                | LNVLEK          | Yes               | 358.22                 | 389.2                 | 10.10                       | 47.2                     | 18.3                | 253465                          | ND                        | ND                        | No           |
| EF1D                | LNVLEK          | Yes               | 358.22                 | 488.3                 | 10.10                       | 47.2                     | 18.3                | 420978                          | ND                        | ND                        | No           |
| EF1D                | LNVLEK          | Yes               | 358.22                 | 602.4                 | 10.10                       | 47.2                     | 18.3                | 381046                          | ND                        | ND                        | No           |
| EF1D                | SIQLDGLVWGASK   | Yes               | 687.38                 | 362.2                 | 19.99                       | 89.7                     | 41.7                | 78640                           | ND                        | ND                        | No           |
| EF1D                | SIQLDGLVWGASK   | Yes               | 687.38                 | 548.3                 | 19.99                       | 89.7                     | 41.7                | 129921                          | ND                        | ND                        | No           |
| EF1D                | SIQLDGLVWGASK   | Yes               | 687.38                 | 647.4                 | 19.99                       | 89.7                     | 32.7                | 32955                           | ND                        | ND                        | No           |
| EF1D                | SIQLDGLVWGASK   | Yes               | 687.38                 | 932.5                 | 19.99                       | 89.7                     | 32.7                | 50509                           | ND                        | ND                        | No           |
| EF1D                | VGTDLLEEEITK    | Yes               | 673.86                 | 619.3                 | 16.53                       | 87.9                     | 41.1                | 48089                           | ND                        | ND                        | No           |
| EF1D                | VGTDLLEEEITK    | Yes               | 673.86                 | 748.4                 | 16.53                       | 87.9                     | 35.1                | 153287                          | ND                        | ND                        | No           |
| EF1D                | VGTDLLEEEITK    | Yes               | 673.86                 | 861.5                 | 16.53                       | 87.9                     | 32.1                | 109510                          | ND                        | ND                        | No           |
| EF1D                | VGTDLLEEEITK    | Yes               | 673.86                 | 974.5                 | 16.53                       | 87.9                     | 41.1                | 25033                           | ND                        | ND                        | No           |
| EF2                 | DSVVAGFQWATK    | Yes               | 654.83                 | 401.2                 | 17.58                       | 85.5                     | 28.3                | 32974                           | ND                        | ND                        | No           |
| EF2                 | DSVVAGFQWATK    | Yes               | 654.83                 | 780.4                 | 17.58                       | 85.5                     | 28.3                | 6934                            | ND                        | ND                        | No           |
| EF2                 | DSVVAGFQWATK    | Yes               | 654.83                 | 837.4                 | 17.58                       | 85.5                     | 31.3                | 32045                           | ND                        | ND                        | No           |
| EF2                 | DSVVAGFQWATK    | Yes               | 654.83                 | 908.5                 | 17.58                       | 85.5                     | 31.3                | 27154                           | ND                        | ND                        | No           |

**Table S5.** MRM assay of individual proteins.

| Protein<br>(_HUMAN) | Peptide                | MS/MS<br>spectrum | Precursor ion<br>(m/z) | Fragment ion<br>(m/z) | Retention time<br>(minutes) | Declustering<br>potential | Collision<br>energy | Area of<br>synthetic<br>peptide | Area in control<br>sample | Area in disease<br>sample | Interference |
|---------------------|------------------------|-------------------|------------------------|-----------------------|-----------------------------|---------------------------|---------------------|---------------------------------|---------------------------|---------------------------|--------------|
| EF2                 | EGIPALDNFLDK           | Yes               | 444.57                 | 468.2                 | 21.45                       | 58.3                      | 20.2                | ND                              | ND                        | ND                        | No           |
| EF2                 | EGIPALDNFLDK           | Yes               | 444.57                 | 522.3                 | 21.45                       | 58.3                      | 26.2                | ND                              | ND                        | ND                        | No           |
| EF2                 | EGIPALDNFLDK           | Yes               | 444.57                 | 636.3                 | 21.45                       | 58.3                      | 20.2                | ND                              | ND                        | ND                        | No           |
| EF2                 | EGIPALDNFLDK           | Yes               | 444.57                 | 751.4                 | 21.45                       | 58.3                      | 20.2                | 5705                            | ND                        | ND                        | No           |
| EF2                 | FSVSPVVR               | Yes               | 445.76                 | 470.3                 | 12.42                       | 58.5                      | 22.1                | 60775                           | ND                        | ND                        | No           |
| EF2                 | FSVSPVVR               | Yes               | 445.76                 | 557.3                 | 12.42                       | 58.5                      | 22.1                | 82628                           | ND                        | ND                        | No           |
| EF2                 | FSVSPVVR               | Yes               | 445.76                 | 656.4                 | 12.42                       | 58.5                      | 22.1                | 53597                           | ND                        | ND                        | No           |
| EF2                 | FSVSPVVR               | Yes               | 445.76                 | 743.4                 | 12.42                       | 58.5                      | 31.1                | 28009                           | ND                        | ND                        | No           |
| EF2                 | GEGQLGPAER             | No                |                        |                       |                             |                           |                     |                                 |                           |                           |              |
| EF2                 | GVQYLNEIK              | Yes               | 532.29                 | 503.3                 | 13.17                       | 69.7                      | 25.9                | 35864                           | ND                        | ND                        | No           |
| EF2                 | GVQYLNEIK              | Yes               | 532.29                 | 616.4                 | 13.17                       | 69.7                      | 25.9                | 30433                           | ND                        | ND                        | No           |
| EF2                 | GVQYLNEIK              | Yes               | 532.29                 | 779.4                 | 13.17                       | 69.7                      | 25.9                | 59020                           | ND                        | ND                        | No           |
| EF2                 | GVQYLNEIK              | Yes               | 532.29                 | 907.5                 | 13.17                       | 69.7                      | 25.9                | 16284                           | ND                        | ND                        | No           |
| EGF                 | FIFWSSEVAGSLYR         | Yes               | 831.42                 | 408.2                 | 23.25                       | 108.3                     | 36.1                | 13750                           | ND                        | ND                        | No           |
| EGF                 | FIFWSSEVAGSLYR         | Yes               | 831.42                 | 666.4                 | 23.25                       | 108.3                     | 42.1                | 12118                           | ND                        | ND                        | No           |
| EGF                 | FIFWSSEVAGSLYR         | Yes               | 831.42                 | 765.4                 | 23.25                       | 108.3                     | 39.1                | 8433                            | ND                        | ND                        | No           |
| EGF                 | FIFWSSEVAGSLYR         | Yes               | 831.42                 | 981.5                 | 23.25                       | 108.3                     | 48.1                | 8311                            | ND                        | ND                        | No           |
| EGF                 | INLHSSFVPLGELK         | Yes               | 777.44                 | 478.3                 | 18.33                       | 101.3                     | 36.7                | 22872                           | ND                        | ND                        | No           |
| EGF                 | INLHSSFVPLGELK         | Yes               | 777.44                 | 656.4                 | 18.33                       | 101.3                     | 45.7                | 73164                           | ND                        | ND                        | No           |
| EGF                 | INLHSSFVPLGELK         | Yes               | 777.44                 | 898.5                 | 18.33                       | 101.3                     | 39.7                | 17241                           | ND                        | ND                        | No           |
| EGF                 | INLHSSFVPLGELK         | Yes               | 777.44                 | 989.6                 | 18.33                       | 101.3                     | 45.7                | 10391                           | ND                        | ND                        | No           |
| EGF                 | LVIASSDLIWPSGITIDFLTDK | No                |                        |                       |                             |                           |                     |                                 |                           |                           |              |
| EGF                 | NQVTPLDILSK            | Yes               | 614.35                 | 342.2                 | 18.53                       | 80.3                      | 29.5                | 827205                          | ND                        | ND                        | No           |

**Table S5.** MRM assay of individual proteins.

| Protein<br>(_HUMAN) | Peptide      | MS/MS<br>spectrum | Precursor ion<br>(m/z) | Fragment ion<br>(m/z) | Retention time<br>(minutes) | Declustering<br>potential | Collision<br>energy | Area of<br>synthetic<br>peptide | Area in control<br>sample | Area in disease<br>sample | Interference |
|---------------------|--------------|-------------------|------------------------|-----------------------|-----------------------------|---------------------------|---------------------|---------------------------------|---------------------------|---------------------------|--------------|
| EGF                 | NQVTPLDILSK  | Yes               | 614.35                 | 785.5                 | 18.53                       | 80.3                      | 29.5                | 585562                          | ND                        | ND                        | No           |
| EGF                 | NQVTPLDILSK  | Yes               | 614.35                 | 886.5                 | 18.53                       | 80.3                      | 29.5                | 371396                          | ND                        | ND                        | No           |
| EGF                 | NQVTPLDILSK  | Yes               | 614.35                 | 985.6                 | 18.53                       | 80.3                      | 29.5                | 313103                          | ND                        | ND                        | No           |
| EGF                 | YPANVAVDPVER | Yes               | 665.34                 | 500.3                 | 11.58                       | 86.8                      | 37.8                | 82787                           | ND                        | ND                        | No           |
| EGF                 | YPANVAVDPVER | Yes               | 665.34                 | 714.4                 | 11.58                       | 86.8                      | 40.8                | 20064                           | ND                        | ND                        | No           |
| EGF                 | YPANVAVDPVER | Yes               | 665.34                 | 785.4                 | 11.58                       | 86.8                      | 40.8                | 38784                           | ND                        | ND                        | No           |
| EGF                 | YPANVAVDPVER | Yes               | 665.34                 | 884.5                 | 11.58                       | 86.8                      | 34.8                | 5715                            | ND                        | ND                        | No           |
| EGFL6               | EDDFDWNPADR  | Yes               | 690.28                 | 458.2                 | 15.22                       | 90                        | 32.9                | 41409                           | ND                        | ND                        | No           |
| EGFL6               | EDDFDWNPADR  | Yes               | 690.28                 | 572.3                 | 15.22                       | 90                        | 29.9                | 24782                           | ND                        | ND                        | No           |
| EGFL6               | EDDFDWNPADR  | Yes               | 690.28                 | 758.4                 | 15.22                       | 90                        | 41.9                | 19741                           | ND                        | ND                        | No           |
| EGFL6               | EDDFDWNPADR  | Yes               | 690.28                 | 873.4                 | 15.22                       | 90                        | 41.9                | 10492                           | ND                        | ND                        | No           |
| EGFL6               | GDVFFPK      | Yes               | 405.21                 | 272.1                 | 14.03                       | 53.3                      | 20.3                | 32940                           | ND                        | ND                        | No           |
| EGFL6               | GDVFFPK      | Yes               | 405.21                 | 538.3                 | 14.03                       | 53.3                      | 20.3                | 63421                           | ND                        | ND                        | No           |
| EGFL6               | GDVFFPK      | Yes               | 405.21                 | 637.4                 | 14.03                       | 53.3                      | 20.3                | 30089                           | ND                        | ND                        | No           |
| EGFL6               | GDVFFPK      | Yes               | 405.21                 | 752.4                 | 14.03                       | 53.3                      | 17.3                | ND                              | ND                        | ND                        | No           |
| EGFL6               | IQLYQGTDATK  | Yes               | 619.33                 | 355.2                 | 10.66                       | 80.9                      | 29.8                | 85510                           | ND                        | ND                        | No           |
| EGFL6               | IQLYQGTDATK  | Yes               | 619.33                 | 592.3                 | 10.66                       | 80.9                      | 29.8                | 49106                           | ND                        | ND                        | No           |
| EGFL6               | IQLYQGTDATK  | Yes               | 619.33                 | 883.4                 | 10.66                       | 80.9                      | 29.8                | 35055                           | ND                        | ND                        | No           |
| EGFL6               | IQLYQGTDATK  | Yes               | 619.33                 | 996.5                 | 10.66                       | 80.9                      | 29.8                | 57152                           | ND                        | ND                        | No           |
| EGFL6               | NSNNALAWEK   | Yes               | 573.78                 | 462.2                 | 11.61                       | 75                        | 36.7                | 37910                           | ND                        | ND                        | No           |
| EGFL6               | NSNNALAWEK   | Yes               | 573.78                 | 533.3                 | 11.61                       | 75                        | 27.7                | 44862                           | ND                        | ND                        | No           |
| EGFL6               | NSNNALAWEK   | Yes               | 573.78                 | 646.4                 | 11.61                       | 75                        | 27.7                | 25476                           | ND                        | ND                        | No           |
| EGFL6               | NSNNALAWEK   | Yes               | 573.78                 | 717.4                 | 11.61                       | 75                        | 27.7                | 14599                           | ND                        | ND                        | No           |

**Table S5.** MRM assay of individual proteins.

| Protein<br>(_HUMAN) | Peptide        | MS/MS<br>spectrum | Precursor ion<br>(m/z) | Fragment ion<br>(m/z) | Retention time<br>(minutes) | Declustering<br>potential | Collision<br>energy | Area of<br>synthetic<br>peptide | Area in control<br>sample | Area in disease<br>sample | Interference                           |
|---------------------|----------------|-------------------|------------------------|-----------------------|-----------------------------|---------------------------|---------------------|---------------------------------|---------------------------|---------------------------|----------------------------------------|
| EGFL6               | VNLQPFNYEEIVSR | Yes               | 854.44                 | 262.2                 | 19.33                       | 111.2                     | 37.1                | 25124                           | ND                        | ND                        | No                                     |
| EGFL6               | VNLQPFNYEEIVSR | Yes               | 854.44                 | 327.2                 | 19.33                       | 111.2                     | 37.1                | 114032                          | ND                        | ND                        | No                                     |
| EGFL6               | VNLQPFNYEEIVSR | Yes               | 854.44                 | 455.3                 | 19.33                       | 111.2                     | 37.1                | 107500                          | ND                        | ND                        | No                                     |
| EGFL6               | VNLQPFNYEEIVSR | Yes               | 854.44                 | 895.5                 | 19.33                       | 111.2                     | 49.1                | 12114                           | ND                        | ND                        | No                                     |
| ENOA                | AVEHINK        | Yes               | 405.73                 | 374.2                 | 5.55                        | 53.3                      | 26.4                | 69683                           | ND                        | ND                        | No                                     |
| ENOA                | AVEHINK        | Yes               | 405.73                 | 437.2                 | 5.55                        | 53.3                      | 26.4                | 30725                           | ND                        | ND                        | No                                     |
| ENOA                | AVEHINK        | Yes               | 405.73                 | 511.3                 | 5.55                        | 53.3                      | 23.4                | 51910                           | ND                        | ND                        | No                                     |
| ENOA                | AVEHINK        | Yes               | 405.73                 | 640.3                 | 5.55                        | 53.3                      | 20.4                | 114288                          | ND                        | ND                        | No                                     |
| ENOA                | GNPTVEVDLFTSK  | Yes               | 703.86                 | 335.2                 | 18.48                       | 91.8                      | 42.5                | 11414                           | ND                        | ND                        | No                                     |
| ENOA                | GNPTVEVDLFTSK  | Yes               | 703.86                 | 595.3                 | 18.48                       | 91.8                      | 36.5                | 5021                            | ND                        | ND                        | No                                     |
| ENOA                | GNPTVEVDLFTSK  | Yes               | 703.86                 | 809.4                 | 18.48                       | 91.8                      | 36.5                | 3943                            | ND                        | ND                        | No                                     |
| ENOA                | GNPTVEVDLFTSK  | Yes               | 703.86                 | 938.5                 | 18.48                       | 91.8                      | 39.5                | 4426                            | ND                        | ND                        | No                                     |
| ENOA                | IGAEVYHNLK     | Yes               | 572.31                 | 674.4                 | 9.82                        | 74.8                      | 27.7                | 45359                           | ND                        | ND                        | No                                     |
| ENOA                | IGAEVYHNLK     | Yes               | 572.31                 | 773.4                 | 9.82                        | 74.8                      | 30.7                | 37643                           | ND                        | ND                        | No                                     |
| ENOA                | IGAEVYHNLK     | Yes               | 572.31                 | 902.5                 | 9.82                        | 74.8                      | 27.7                | 11652                           | ND                        | ND                        | No                                     |
| ENOA                | IGAEVYHNLK     | Yes               | 572.31                 | 973.5                 | 9.82                        | 74.8                      | 27.7                | 5767                            | ND                        | ND                        | No                                     |
| ENOA                | YISPDQLADLYK   | Yes               | 713.37                 | 277.2                 | 18.15                       | 93                        | 33.9                | 662293                          | 21499                     | 15828                     | No                                     |
| ENOA                | YISPDQLADLYK   | Yes               | 713.37                 | 364.2                 | 18.15                       | 93                        | 33.9                | 366844                          | 1249                      | 7169                      | Yes (Based on<br>Transition<br>Ratios) |
| ENOA                | YISPDQLADLYK   | Yes               | 713.37                 | 609.3                 | 18.15                       | 93                        | 42.9                | 120477                          | 3404                      | ND                        | No                                     |
| ENOA                | YISPDQLADLYK   | Yes               | 713.37                 | 965.5                 | 18.15                       | 93                        | 42.9                | 48642                           | 1723                      | ND                        | No                                     |
| ENOA                | YNQLLR         | Yes               | 403.73                 | 278.1                 | 10.19                       | 53.1                      | 20.3                | 153241                          | ND                        | ND                        | No                                     |
| ENOA                | YNQLLR         | Yes               | 403.73                 | 288.2                 | 10.19                       | 53.1                      | 29.3                | 222958                          | 13878                     | 23898                     | No                                     |

**Table S5.** MRM assay of individual proteins.

| Protein<br>(_HUMAN) | Peptide                    | MS/MS<br>spectrum | Precursor ion<br>(m/z) | Fragment ion<br>(m/z) | Retention time<br>(minutes) | Declustering<br>potential | Collision<br>energy | Area of<br>synthetic<br>peptide | Area in control<br>sample | Area in disease<br>sample | Interference |
|---------------------|----------------------------|-------------------|------------------------|-----------------------|-----------------------------|---------------------------|---------------------|---------------------------------|---------------------------|---------------------------|--------------|
| ENOA                | YNQLLR                     | Yes               | 403.73                 | 529.3                 | 10.19                       | 53.1                      | 20.3                | 213830                          | 7357                      | 5631                      | No           |
| ENOA                | YNQLLR                     | Yes               | 403.73                 | 643.4                 | 10.19                       | 53.1                      | 20.3                | 123313                          | 6065                      | 5148                      | No           |
| ENOG                | DATNVGDEGGFAPNILENSEALELVK | No                |                        |                       |                             |                           |                     |                                 |                           |                           |              |
| ENOG                | GNPTVEVDLYTAK              | Yes               | 703.86                 | 482.3                 | 13.91                       | 91.8                      | 42.5                | 14402                           | 46090                     | 31666                     | No           |
| ENOG                | GNPTVEVDLYTAK              | Yes               | 703.86                 | 598.3                 | 13.91                       | 91.8                      | 42.5                | ND                              | ND                        | ND                        | No           |
| ENOG                | IEEELGDEAR                 | Yes               | 580.78                 | 547.2                 | 9.04                        | 75.9                      | 28.1                | 43465                           | ND                        | ND                        | No           |
| ENOG                | IEEELGDEAR                 | Yes               | 580.78                 | 660.3                 | 9.04                        | 75.9                      | 37.1                | 18199                           | ND                        | ND                        | No           |
| ENOG                | IEEELGDEAR                 | Yes               | 580.78                 | 789.4                 | 9.04                        | 75.9                      | 37.1                | 14565                           | ND                        | ND                        | No           |
| ENOG                | IEEELGDEAR                 | Yes               | 580.78                 | 918.4                 | 9.04                        | 75.9                      | 28.1                | 23663                           | ND                        | ND                        | No           |
| ENOG                | LGAEVYHTLK                 | Yes               | 377.55                 | 498.3                 | 10.48                       | 49.7                      | 22.8                | 68660                           | ND                        | ND                        | No           |
| ENOG                | LGAEVYHTLK                 | Yes               | 377.55                 | 661.4                 | 10.48                       | 49.7                      | 25.8                | 65356                           | ND                        | ND                        | No           |
| ENOG                | LGAEVYHTLK                 | Yes               | 377.55                 | 760.4                 | 10.48                       | 49.7                      | 25.8                | 13284                           | ND                        | ND                        | No           |
| ENOG                | LGAEVYHTLK                 | Yes               | 377.55                 | 889.5                 | 10.48                       | 49.7                      | 25.8                | ND                              | ND                        | ND                        | No           |
| ENOG                | YITGDQLGALYQDFVR           | Yes               | 620.32                 | 536.3                 | 23.42                       | 81                        | 29.2                | 39286                           | ND                        | ND                        | No           |
| ENOG                | YITGDQLGALYQDFVR           | Yes               | 620.32                 | 664.3                 | 23.42                       | 81                        | 26.2                | 46305                           | ND                        | ND                        | No           |
| ENOG                | YITGDQLGALYQDFVR           | Yes               | 620.32                 | 827.4                 | 23.42                       | 81                        | 29.2                | 77152                           | ND                        | ND                        | No           |
| ENOG                | YITGDQLGALYQDFVR           | Yes               | 620.32                 | 940.5                 | 23.42                       | 81                        | 32.2                | 12170                           | ND                        | ND                        | No           |
| ENOX2               | ALYLSGYR                   | No                |                        |                       |                             |                           |                     |                                 |                           |                           |              |
| ENOX2               | ETEESALVSQAEALK            | Yes               | 535.61                 | 647.3                 | 16.55                       | 70.1                      | 24.9                | 19602                           | ND                        | ND                        | No           |
| ENOX2               | ETEESALVSQAEALK            | Yes               | 535.61                 | 746.4                 | 16.55                       | 70.1                      | 24.9                | 50961                           | ND                        | ND                        | No           |
| ENOX2               | ETEESALVSQAEALK            | Yes               | 535.61                 | 760.3                 | 16.55                       | 70.1                      | 24.9                | 18019                           | ND                        | ND                        | No           |
| ENOX2               | ETEESALVSQAEALK            | Yes               | 535.61                 | 845.5                 | 16.55                       | 70.1                      | 24.9                | 12619                           | ND                        | ND                        | No           |
| ENOX2               | FSEAVQTLTLTWIER            | Yes               | 846.95                 | 435.2                 | 24.73                       | 110.3                     | 36.8                | 1948                            | ND                        | ND                        | No           |



**Table S5.** MRM assay of individual proteins.

| Protein<br>(_HUMAN) | Peptide                | MS/MS<br>spectrum | Precursor ion<br>(m/z) | Fragment ion<br>(m/z) | Retention time<br>(minutes) | Declustering<br>potential | Collision<br>energy | Area of<br>synthetic<br>peptide | Area in control<br>sample | Area in disease<br>sample | Interference |
|---------------------|------------------------|-------------------|------------------------|-----------------------|-----------------------------|---------------------------|---------------------|---------------------------------|---------------------------|---------------------------|--------------|
| ENOX2               | FSEAVQTLTWER           | Yes               | 846.95                 | 704.4                 | 24.73                       | 110.3                     | 39.8                | 2300                            | ND                        | ND                        | No           |
| ENOX2               | FSEAVQTLTWER           | Yes               | 846.95                 | 817.5                 | 24.73                       | 110.3                     | 36.8                | 3734                            | ND                        | ND                        | No           |
| ENOX2               | FSEAVQTLTWER           | Yes               | 846.95                 | 930.5                 | 24.73                       | 110.3                     | 36.8                | 2040                            | ND                        | ND                        | No           |
| ENOX2               | QALSGILIQFEQIVAVYHSASK | Yes               | 801.44                 | 313.2                 | 24.67                       | 104.4                     | 35.4                | 15951                           | ND                        | ND                        | No           |
| ENOX2               | QALSGILIQFEQIVAVYHSASK | Yes               | 801.44                 | 692.3                 | 24.67                       | 104.4                     | 41.4                | 12585                           | ND                        | ND                        | No           |
| ENOX2               | QALSGILIQFEQIVAVYHSASK | Yes               | 801.44                 | 862.4                 | 24.67                       | 104.4                     | 41.4                | 16454                           | ND                        | ND                        | No           |
| ENOX2               | QALSGILIQFEQIVAVYHSASK | Yes               | 801.44                 | 961.5                 | 24.67                       | 104.4                     | 38.4                | 11496                           | ND                        | ND                        | No           |
| ENOX2               | WLWVYEIGYAADNSR        | Yes               | 921.94                 | 300.2                 | 24.40                       | 119.9                     | 46.1                | 6976                            | ND                        | ND                        | No           |
| ENOX2               | WLWVYEIGYAADNSR        | Yes               | 921.94                 | 633.3                 | 24.40                       | 119.9                     | 43.1                | 2115                            | ND                        | ND                        | No           |
| ENOX2               | WLWVYEIGYAADNSR        | Yes               | 921.94                 | 853.4                 | 24.40                       | 119.9                     | 43.1                | 7253                            | ND                        | ND                        | No           |
| ENOX2               | WLWVYEIGYAADNSR        | Yes               | 921.94                 | 966.5                 | 24.40                       | 119.9                     | 46.1                | 3062                            | ND                        | ND                        | No           |
| ENPL                | EVEEDEYK               | Yes               | 520.72                 | 310.2                 | 6.67                        | 68.2                      | 25.4                | 159859                          | ND                        | ND                        | No           |
| ENPL                | EVEEDEYK               | Yes               | 520.72                 | 554.2                 | 6.67                        | 68.2                      | 25.4                | 138082                          | ND                        | ND                        | No           |
| ENPL                | EVEEDEYK               | Yes               | 520.72                 | 683.3                 | 6.67                        | 68.2                      | 22.4                | 91890                           | ND                        | ND                        | No           |
| ENPL                | EVEEDEYK               | Yes               | 520.72                 | 812.3                 | 6.67                        | 68.2                      | 22.4                | 122829                          | ND                        | ND                        | No           |
| ENPL                | LISLTDENALSGNEELTVK    | No                |                        |                       |                             |                           |                     |                                 |                           |                           |              |
| ENPL                | SGTSEFLNK              | Yes               | 491.75                 | 521.3                 | 9.98                        | 64.4                      | 27.1                | 153467                          | 7020                      | 9725                      | No           |
| ENPL                | SGTSEFLNK              | Yes               | 491.75                 | 650.4                 | 9.98                        | 64.4                      | 27.1                | 115761                          | 3255                      | 3174                      | No           |
| ENPL                | SGTSEFLNK              | Yes               | 491.75                 | 737.4                 | 9.98                        | 64.4                      | 24.1                | 162128                          | 13512                     | 9671                      | No           |
| ENPL                | SGTSEFLNK              | Yes               | 491.75                 | 838.4                 | 9.98                        | 64.4                      | 24.1                | 53908                           | 1878                      | 1869                      | No           |
| ENPL                | SGYLLPDTK              | Yes               | 497.27                 | 460.2                 | 12.37                       | 65.1                      | 24.4                | 700923                          | 27388                     | 28600                     | No           |
| ENPL                | SGYLLPDTK              | Yes               | 497.27                 | 573.3                 | 12.37                       | 65.1                      | 24.4                | 522473                          | 26652                     | 15849                     | No           |
| ENPL                | SGYLLPDTK              | Yes               | 497.27                 | 686.4                 | 12.37                       | 65.1                      | 24.4                | 430229                          | 18227                     | 12571                     | No           |

**Table S5.** MRM assay of individual proteins.

| Protein<br>(_HUMAN) | Peptide                             | MS/MS<br>spectrum | Precursor ion<br>(m/z) | Fragment ion<br>(m/z) | Retention time<br>(minutes) | Declustering<br>potential | Collision<br>energy | Area of<br>synthetic<br>peptide | Area in control<br>sample | Area in disease<br>sample | Interference                           |
|---------------------|-------------------------------------|-------------------|------------------------|-----------------------|-----------------------------|---------------------------|---------------------|---------------------------------|---------------------------|---------------------------|----------------------------------------|
| ENPL                | SGYLLPDTK                           | Yes               | 497.27                 | 849.5                 | 12.37                       | 65.1                      | 24.4                | 40441                           | 1030                      | 1047                      | No                                     |
| ENPL                | TDDEVVQR                            | Yes               | 481.23                 | 402.2                 | 6.39                        | 63.1                      | 23.7                | 158185                          | ND                        | ND                        | No                                     |
| ENPL                | TDDEVVQR                            | Yes               | 481.23                 | 501.3                 | 6.39                        | 63.1                      | 23.7                | 86187                           | ND                        | ND                        | No                                     |
| ENPL                | TDDEVVQR                            | Yes               | 481.23                 | 630.4                 | 6.39                        | 63.1                      | 23.7                | 53938                           | ND                        | ND                        | No                                     |
| ENPL                | TDDEVVQR                            | Yes               | 481.23                 | 745.4                 | 6.39                        | 63.1                      | 23.7                | 185205                          | ND                        | ND                        | No                                     |
| EPHB6               | RPHFDQLVAAFDDK                      | Yes               | 772.4                  | 254.2                 | 16.97                       | 100.6                     | 36.5                | 6478                            | 23825                     | 4931                      | No                                     |
| EPHB6               | RPHFDQLVAAFDDK                      | Yes               | 772.4                  | 480.2                 | 16.97                       | 100.6                     | 42.5                | 6160                            | 12516                     | ND                        | No                                     |
| EPHB6               | RPHFDQLVAAFDDK                      | Yes               | 772.4                  | 551.3                 | 16.97                       | 100.6                     | 39.5                | 6601                            | 19284                     | 3474                      | No                                     |
| EPHB6               | RPHFDQLVAAFDDK                      | Yes               | 772.4                  | 653.3                 | 16.97                       | 100.6                     | 45.5                | 8393                            | 6547                      | ND                        | Yes (Based on<br>Transition<br>Ratios) |
| EPHB6               | SFGPLTQR                            | Yes               | 453.25                 | 404.2                 | 11.72                       | 59.5                      | 25.4                | 34875                           | ND                        | ND                        | No                                     |
| EPHB6               | SFGPLTQR                            | Yes               | 453.25                 | 517.3                 | 11.72                       | 59.5                      | 28.4                | 30445                           | ND                        | ND                        | No                                     |
| EPHB6               | SFGPLTQR                            | Yes               | 453.25                 | 614.4                 | 11.72                       | 59.5                      | 22.4                | 31306                           | ND                        | ND                        | No                                     |
| EPHB6               | SFGPLTQR                            | Yes               | 453.25                 | 671.4                 | 11.72                       | 59.5                      | 22.4                | 111464                          | 14453                     | 15195                     | No                                     |
| EPHB6               | VDTIAADESFPSSSSSSSSSSSAAWAVGPHGAGQR | No                |                        |                       |                             |                           |                     |                                 |                           |                           |                                        |
| EPHB6               | VYFQTL PQGELSSQLPER                 | Yes               | 698.03                 | 401.2                 | 17.42                       | 91                        | 33.1                | 157460                          | ND                        | ND                        | No                                     |
| EPHB6               | VYFQTL PQGELSSQLPER                 | Yes               | 698.03                 | 514.3                 | 17.42                       | 91                        | 33.1                | 52989                           | ND                        | ND                        | No                                     |
| EPHB6               | VYFQTL PQGELSSQLPER                 | Yes               | 698.03                 | 729.4                 | 17.42                       | 91                        | 33.1                | 50535                           | ND                        | ND                        | No                                     |
| EPHB6               | VYFQTL PQGELSSQLPER                 | Yes               | 698.03                 | 816.4                 | 17.42                       | 91                        | 33.1                | 83906                           | ND                        | ND                        | No                                     |
| EPHB6               | WAAPEVIAHGK                         | Yes               | 393.55                 | 341.2                 | 12.29                       | 51.8                      | 23.6                | 189724                          | 26283                     | ND                        | No                                     |
| EPHB6               | WAAPEVIAHGK                         | Yes               | 393.55                 | 426.2                 | 12.29                       | 51.8                      | 20.6                | 151412                          | 74312                     | 72181                     | Yes (Based on<br>Transition<br>Ratios) |

**Table S5.** MRM assay of individual proteins.

| Protein<br>(_HUMAN) | Peptide             | MS/MS<br>spectrum | Precursor ion<br>(m/z) | Fragment ion<br>(m/z) | Retention time<br>(minutes) | Declustering<br>potential | Collision<br>energy | Area of<br>synthetic<br>peptide | Area in control<br>sample | Area in disease<br>sample | Interference |
|---------------------|---------------------|-------------------|------------------------|-----------------------|-----------------------------|---------------------------|---------------------|---------------------------------|---------------------------|---------------------------|--------------|
| EPHB6               | WAAPEVIAHGK         | Yes               | 393.55                 | 525.3                 | 12.29                       | 51.8                      | 20.6                | 205261                          | 20303                     | 16073                     | No           |
| EPHB6               | WAAPEVIAHGK         | Yes               | 393.55                 | 624.4                 | 12.29                       | 51.8                      | 20.6                | 56079                           | ND                        | ND                        | No           |
| EPOR                | IWPGIPSESEFEGFLTTHK | Yes               | 758.05                 | 284.2                 | 24.46                       | 98.8                      | 45.2                | 33116                           | ND                        | ND                        | No           |
| EPOR                | IWPGIPSESEFEGFLTTHK | Yes               | 758.05                 | 300.2                 | 24.46                       | 98.8                      | 33.2                | 144234                          | ND                        | ND                        | No           |
| EPOR                | IWPGIPSESEFEGFLTTHK | Yes               | 758.05                 | 633.3                 | 24.46                       | 98.8                      | 42.2                | 23782                           | ND                        | ND                        | No           |
| EPOR                | IWPGIPSESEFEGFLTTHK | Yes               | 758.05                 | 803.4                 | 24.46                       | 98.8                      | 42.2                | 31798                           | ND                        | ND                        | No           |
| EPOR                | LADESGHVLR          | Yes               | 399.22                 | 486.3                 | 9.47                        | 52.5                      | 23.9                | 61944                           | ND                        | ND                        | No           |
| EPOR                | LADESGHVLR          | Yes               | 399.22                 | 623.4                 | 9.47                        | 52.5                      | 26.9                | 24880                           | ND                        | ND                        | No           |
| EPOR                | LADESGHVLR          | Yes               | 399.22                 | 680.4                 | 9.47                        | 52.5                      | 26.9                | 30395                           | ND                        | ND                        | No           |
| EPOR                | LADESGHVLR          | Yes               | 399.22                 | 767.5                 | 9.47                        | 52.5                      | 20.9                | 31603                           | ND                        | ND                        | No           |
| EPOR                | VIHINEVLLDAPVGLVAR  | Yes               | 676.41                 | 711.5                 | 22.76                       | 88.3                      | 29                  | 117205                          | ND                        | ND                        | No           |
| EPOR                | VIHINEVLLDAPVGLVAR  | Yes               | 676.41                 | 805.5                 | 22.76                       | 88.3                      | 41                  | 69973                           | ND                        | ND                        | No           |
| EPOR                | VIHINEVLLDAPVGLVAR  | Yes               | 676.41                 | 897.5                 | 22.76                       | 88.3                      | 29                  | 48225                           | ND                        | ND                        | No           |
| EPOR                | VIHINEVLLDAPVGLVAR  | Yes               | 676.41                 | 904.5                 | 22.76                       | 88.3                      | 32                  | 68395                           | ND                        | ND                        | No           |
| EPOR                | VTAASGAPR           | Yes               | 415.23                 | 629.3                 | 5.61                        | 54.6                      | 20.8                | 229518                          | ND                        | ND                        | No           |
| EPOR                | VTAASGAPR           | Yes               | 415.23                 | 730.4                 | 5.61                        | 54.6                      | 20.8                | 49616                           | ND                        | ND                        | No           |
| EPOR                | YEVDVSAGNGAGSVQR    | Yes               | 536.93                 | 293.1                 | 10.18                       | 70.3                      | 27.9                | 31670                           | ND                        | ND                        | No           |
| EPOR                | YEVDVSAGNGAGSVQR    | Yes               | 536.93                 | 606.3                 | 10.18                       | 70.3                      | 21.9                | 7098                            | ND                        | ND                        | No           |
| EPOR                | YEVDVSAGNGAGSVQR    | Yes               | 536.93                 | 617.3                 | 10.18                       | 70.3                      | 24.9                | 5543                            | ND                        | ND                        | No           |
| EPOR                | YEVDVSAGNGAGSVQR    | Yes               | 536.93                 | 674.4                 | 10.18                       | 70.3                      | 24.9                | 6936                            | ND                        | ND                        | No           |
| ERBB3               | GALGPQLLLNWGVQIAK   | No                |                        |                       |                             |                           |                     |                                 |                           |                           |              |
| ERBB3               | GESIEPLDPSEK        | Yes               | 650.82                 | 460.2                 | 11.37                       | 85                        | 40.1                | 293168                          | ND                        | ND                        | No           |
| ERBB3               | GESIEPLDPSEK        | Yes               | 650.82                 | 575.3                 | 11.37                       | 85                        | 40.1                | 16213                           | ND                        | ND                        | No           |

**Table S5.** MRM assay of individual proteins.

| Protein<br>(_HUMAN) | Peptide               | MS/MS<br>spectrum | Precursor ion<br>(m/z) | Fragment ion<br>(m/z) | Retention time<br>(minutes) | Declustering<br>potential | Collision<br>energy | Area of<br>synthetic<br>peptide | Area in control<br>sample | Area in disease<br>sample | Interference                           |
|---------------------|-----------------------|-------------------|------------------------|-----------------------|-----------------------------|---------------------------|---------------------|---------------------------------|---------------------------|---------------------------|----------------------------------------|
| ERBB3               | GESIEPLDPSEK          | Yes               | 650.82                 | 785.4                 | 11.37                       | 85                        | 31.1                | 202724                          | ND                        | ND                        | No                                     |
| ERBB3               | GESIEPLDPSEK          | Yes               | 650.82                 | 914.4                 | 11.37                       | 85                        | 31.1                | 45628                           | ND                        | ND                        | No                                     |
| ERBB3               | LAEVPDLLEK            | Yes               | 563.82                 | 314.2                 | 16.74                       | 73.7                      | 27.3                | 958105                          | ND                        | ND                        | No                                     |
| ERBB3               | LAEVPDLLEK            | Yes               | 563.82                 | 714.4                 | 16.74                       | 73.7                      | 27.3                | 759834                          | ND                        | ND                        | No                                     |
| ERBB3               | LAEVPDLLEK            | Yes               | 563.82                 | 813.5                 | 16.74                       | 73.7                      | 27.3                | 177956                          | ND                        | ND                        | No                                     |
| ERBB3               | LAEVPDLLEK            | Yes               | 563.82                 | 942.5                 | 16.74                       | 73.7                      | 27.3                | 206519                          | ND                        | ND                        | No                                     |
| ERBB3               | SLEATDSAFDNPDYWHSR    | Yes               | 704.31                 | 399.2                 | 15.86                       | 91.9                      | 39.5                | 16987                           | ND                        | ND                        | No                                     |
| ERBB3               | SLEATDSAFDNPDYWHSR    | Yes               | 704.31                 | 585.3                 | 15.86                       | 91.9                      | 42.5                | 10383                           | ND                        | ND                        | No                                     |
| ERBB3               | SLEATDSAFDNPDYWHSR    | Yes               | 704.31                 | 748.4                 | 15.86                       | 91.9                      | 42.5                | 12350                           | ND                        | ND                        | No                                     |
| ERBB3               | SLEATDSAFDNPDYWHSR    | Yes               | 704.31                 | 960.4                 | 15.86                       | 91.9                      | 39.5                | 11282                           | ND                        | ND                        | No                                     |
| ERBB3               | SPSQVQVADFGVADLLPPDDK | Yes               | 733.37                 | 262.1                 | 21.26                       | 95.6                      | 44                  | 7191                            | ND                        | 45106                     | Yes (Based on<br>Transition<br>Ratios) |
| ERBB3               | SPSQVQVADFGVADLLPPDDK | Yes               | 733.37                 | 571.3                 | 21.26                       | 95.6                      | 38                  | 54317                           | ND                        | ND                        | No                                     |
| ERBB3               | SPSQVQVADFGVADLLPPDDK | Yes               | 733.37                 | 627.3                 | 21.26                       | 95.6                      | 35                  | 5223                            | ND                        | 3117                      | Yes (Based on<br>Transition<br>Ratios) |
| ERBB3               | SPSQVQVADFGVADLLPPDDK | Yes               | 733.37                 | 684.4                 | 21.26                       | 95.6                      | 32                  | 6658                            | ND                        | ND                        | No                                     |
| EREG                | VAQVSITK              | Yes               | 423.26                 | 448.3                 | 8.24                        | 55.6                      | 30.1                | 63643                           | 15149                     | 26855                     | No                                     |
| EREG                | VAQVSITK              | Yes               | 423.26                 | 547.3                 | 8.24                        | 55.6                      | 21.1                | 56975                           | 11251                     | 10492                     | No                                     |
| EREG                | VAQVSITK              | Yes               | 423.26                 | 675.4                 | 8.24                        | 55.6                      | 21.1                | 105937                          | ND                        | ND                        | No                                     |
| EREG                | VAQVSITK              | Yes               | 423.26                 | 746.4                 | 8.24                        | 55.6                      | 21.1                | 71973                           | ND                        | ND                        | No                                     |
| EREG                | VTSGDPELPQV           | Yes               | 571.29                 | 343.2                 | 14.55                       | 74.7                      | 27.6                | 305277                          | ND                        | ND                        | No                                     |
| EREG                | VTSGDPELPQV           | Yes               | 571.29                 | 460.2                 | 14.55                       | 74.7                      | 24.6                | 53166                           | ND                        | ND                        | No                                     |

**Table S5.** MRM assay of individual proteins.

| Protein<br>(_HUMAN) | Peptide           | MS/MS<br>spectrum | Precursor ion<br>(m/z) | Fragment ion<br>(m/z) | Retention time<br>(minutes) | Declustering<br>potential | Collision<br>energy | Area of<br>synthetic<br>peptide | Area in control<br>sample | Area in disease<br>sample | Interference |
|---------------------|-------------------|-------------------|------------------------|-----------------------|-----------------------------|---------------------------|---------------------|---------------------------------|---------------------------|---------------------------|--------------|
| EREG                | VTSGDPELPQV       | Yes               | 571.29                 | 686.3                 | 14.55                       | 74.7                      | 27.6                | 20165                           | ND                        | ND                        | No           |
| EREG                | VTSGDPELPQV       | Yes               | 571.29                 | 799.4                 | 14.55                       | 74.7                      | 24.6                | 85149                           | ND                        | ND                        | No           |
| ERO1A               | AVLQWTK           | Yes               | 423.25                 | 562.3                 | 12.94                       | 55.6                      | 21.1                | 45163                           | ND                        | ND                        | No           |
| ERO1A               | AVLQWTK           | Yes               | 423.25                 | 675.4                 | 12.94                       | 55.6                      | 21.1                | 144756                          | ND                        | ND                        | No           |
| ERO1A               | AVLQWTK           | Yes               | 423.25                 | 699.4                 | 12.94                       | 55.6                      | 21.1                | 2110                            | ND                        | ND                        | No           |
| ERO1A               | AVLQWTK           | Yes               | 423.25                 | 774.5                 | 12.94                       | 55.6                      | 21.1                | 7725                            | ND                        | ND                        | No           |
| ERO1A               | LGAVDESLSEETQK    | Yes               | 753.37                 | 376.2                 | 11.19                       | 98.2                      | 35.6                | 24992                           | ND                        | ND                        | No           |
| ERO1A               | LGAVDESLSEETQK    | Yes               | 753.37                 | 721.3                 | 11.19                       | 98.2                      | 38.6                | 34456                           | ND                        | ND                        | No           |
| ERO1A               | LGAVDESLSEETQK    | Yes               | 753.37                 | 834.4                 | 11.19                       | 98.2                      | 35.6                | 11287                           | ND                        | ND                        | No           |
| ERO1A               | LGAVDESLSEETQK    | Yes               | 753.37                 | 921.5                 | 11.19                       | 98.2                      | 44.6                | 14954                           | ND                        | ND                        | No           |
| ERO1A               | LLESDYFR          | Yes               | 521.76                 | 485.3                 | 14.82                       | 68.3                      | 34.5                | 48917                           | ND                        | 4165                      | No           |
| ERO1A               | LLESDYFR          | Yes               | 521.76                 | 687.3                 | 14.82                       | 68.3                      | 25.5                | 38479                           | ND                        | 1818                      | No           |
| ERO1A               | LLESDYFR          | Yes               | 521.76                 | 816.4                 | 14.82                       | 68.3                      | 25.5                | 110559                          | ND                        | 8550                      | No           |
| ERO1A               | LLESDYFR          | Yes               | 521.76                 | 929.4                 | 14.82                       | 68.3                      | 34.5                | 8952                            | ND                        | ND                        | No           |
| ERO1A               | NLLQNIH           | Yes               | 426.24                 | 383.2                 | 13.42                       | 56                        | 21.3                | 35545                           | 6471                      | ND                        | No           |
| ERO1A               | NLLQNIH           | Yes               | 426.24                 | 469.3                 | 13.42                       | 56                        | 24.3                | 17521                           | 1787                      | 1459                      | No           |
| ERO1A               | NLLQNIH           | Yes               | 426.24                 | 511.3                 | 13.42                       | 56                        | 21.3                | 52614                           | ND                        | ND                        | No           |
| ERO1A               | NLLQNIH           | Yes               | 426.24                 | 624.3                 | 13.42                       | 56                        | 21.3                | 114838                          | 5388                      | 4068                      | No           |
| ERO1A               | VLPFFERPDFQLFTGNK | Yes               | 685.7                  | 318.2                 | 24.08                       | 89.5                      | 41.5                | 184511                          | ND                        | ND                        | No           |
| ERO1A               | VLPFFERPDFQLFTGNK | Yes               | 685.7                  | 419.2                 | 24.08                       | 89.5                      | 41.5                | 230266                          | ND                        | ND                        | No           |
| ERO1A               | VLPFFERPDFQLFTGNK | Yes               | 685.7                  | 566.3                 | 24.08                       | 89.5                      | 35.5                | 90886                           | ND                        | ND                        | No           |
| ERO1A               | VLPFFERPDFQLFTGNK | Yes               | 685.7                  | 954.5                 | 24.08                       | 89.5                      | 35.5                | 28868                           | ND                        | ND                        | No           |
| ESM1                | FPPFQYSVTK        | Yes               | 632.32                 | 392.2                 | 20.18                       | 82.6                      | 33.3                | 134086                          | ND                        | ND                        | No           |

**Table S5.** MRM assay of individual proteins.

| Protein<br>(_HUMAN) | Peptide        | MS/MS<br>spectrum | Precursor ion<br>(m/z) | Fragment ion<br>(m/z) | Retention time<br>(minutes) | Declustering<br>potential | Collision<br>energy | Area of<br>synthetic<br>peptide | Area in control<br>sample | Area in disease<br>sample | Interference |
|---------------------|----------------|-------------------|------------------------|-----------------------|-----------------------------|---------------------------|---------------------|---------------------------------|---------------------------|---------------------------|--------------|
| ESM1                | FPPFQYSVTK     | Yes               | 632.32                 | 597.3                 | 20.18                       | 82.6                      | 39.3                | 138780                          | ND                        | ND                        | No           |
| ESM1                | FPPFQYSVTK     | Yes               | 632.32                 | 725.4                 | 20.18                       | 82.6                      | 33.3                | 118244                          | ND                        | ND                        | No           |
| ESM1                | FPPFQYSVTK     | Yes               | 632.32                 | 872.5                 | 20.18                       | 82.6                      | 33.3                | 242120                          | ND                        | ND                        | No           |
| EZRI                | EAQDDLK        | Yes               | 459.23                 | 359.3                 | 7.74                        | 60.2                      | 22.7                | 290721                          | ND                        | ND                        | No           |
| EZRI                | EAQDDLK        | Yes               | 459.23                 | 589.3                 | 7.74                        | 60.2                      | 22.7                | 311887                          | ND                        | ND                        | No           |
| EZRI                | EAQDDLK        | Yes               | 459.23                 | 717.4                 | 7.74                        | 60.2                      | 22.7                | 94101                           | ND                        | ND                        | No           |
| EZRI                | ELSEQIQR       | Yes               | 501.76                 | 303.2                 | 8.24                        | 65.7                      | 24.6                | 36442                           | 5003                      | 2466                      | No           |
| EZRI                | ELSEQIQR       | Yes               | 501.76                 | 416.3                 | 8.24                        | 65.7                      | 21.6                | 16893                           | ND                        | 2803                      | No           |
| EZRI                | ELSEQIQR       | Yes               | 501.76                 | 544.3                 | 8.24                        | 65.7                      | 24.6                | 23090                           | 1915                      | 2814                      | No           |
| EZRI                | ELSEQIQR       | Yes               | 501.76                 | 760.4                 | 8.24                        | 65.7                      | 27.6                | 42622                           | 4757                      | 6660                      | No           |
| EZRI                | IQVWHAHR       | Yes               | 392.54                 | 312.2                 | 8.88                        | 51.6                      | 26.6                | 10843                           | ND                        | ND                        | No           |
| EZRI                | IQVWHAHR       | Yes               | 392.54                 | 512.3                 | 8.88                        | 51.6                      | 26.6                | 9140                            | ND                        | ND                        | No           |
| EZRI                | IQVWHAHR       | Yes               | 392.54                 | 649.3                 | 8.88                        | 51.6                      | 23.6                | 6875                            | ND                        | ND                        | No           |
| EZRI                | IQVWHAHR       | Yes               | 392.54                 | 835.4                 | 8.88                        | 51.6                      | 26.6                | ND                              | ND                        | ND                        | No           |
| EZRI                | LQDYEEK        | Yes               | 462.72                 | 276.2                 | 6.59                        | 60.7                      | 31.9                | 121469                          | ND                        | ND                        | No           |
| EZRI                | LQDYEEK        | Yes               | 462.72                 | 568.3                 | 6.59                        | 60.7                      | 25.9                | 49412                           | ND                        | ND                        | No           |
| EZRI                | LQDYEEK        | Yes               | 462.72                 | 683.3                 | 6.59                        | 60.7                      | 22.9                | 184425                          | ND                        | ND                        | No           |
| EZRI                | LQDYEEK        | Yes               | 462.72                 | 811.3                 | 6.59                        | 60.7                      | 22.9                | 73890                           | ND                        | ND                        | No           |
| EZRI                | SGYLSSER       | Yes               | 449.72                 | 308.1                 | 7.81                        | 59                        | 22.3                | 56775                           | ND                        | ND                        | No           |
| EZRI                | SGYLSSER       | Yes               | 449.72                 | 478.2                 | 7.81                        | 59                        | 22.3                | 61830                           | ND                        | ND                        | No           |
| EZRI                | SGYLSSER       | Yes               | 449.72                 | 591.3                 | 7.81                        | 59                        | 22.3                | 42151                           | ND                        | ND                        | No           |
| EZRI                | SGYLSSER       | Yes               | 449.72                 | 754.4                 | 7.81                        | 59                        | 25.3                | 7934                            | ND                        | ND                        | No           |
| F10A1               | ADEPSSESDLEIDK | Yes               | 832.36                 | 262.1                 | 11.02                       | 108.4                     | 39.1                | 30732                           | ND                        | ND                        | No           |

**Table S5.** MRM assay of individual proteins.

| Protein<br>(_HUMAN) | Peptide         | MS/MS<br>spectrum | Precursor ion<br>(m/z) | Fragment ion<br>(m/z) | Retention time<br>(minutes) | Declustering<br>potential | Collision<br>energy | Area of<br>synthetic<br>peptide | Area in control<br>sample | Area in disease<br>sample | Interference |
|---------------------|-----------------|-------------------|------------------------|-----------------------|-----------------------------|---------------------------|---------------------|---------------------------------|---------------------------|---------------------------|--------------|
| F10A1               | ADEPSSEESDLEIDK | Yes               | 832.36                 | 375.2                 | 11.02                       | 108.4                     | 48.1                | 28226                           | ND                        | ND                        | No           |
| F10A1               | ADEPSSEESDLEIDK | Yes               | 832.36                 | 617.4                 | 11.02                       | 108.4                     | 48.1                | 20461                           | ND                        | ND                        | No           |
| F10A1               | ADEPSSEESDLEIDK | Yes               | 832.36                 | 948.5                 | 11.02                       | 108.4                     | 39.1                | 11096                           | ND                        | ND                        | No           |
| F10A1               | AIDLFTDAIK      | Yes               | 553.81                 | 300.2                 | 19.40                       | 72.4                      | 26.9                | 622894                          | ND                        | ND                        | No           |
| F10A1               | AIDLFTDAIK      | Yes               | 553.81                 | 694.4                 | 19.40                       | 72.4                      | 26.9                | 360087                          | ND                        | ND                        | No           |
| F10A1               | AIDLFTDAIK      | Yes               | 553.81                 | 807.5                 | 19.40                       | 72.4                      | 26.9                | 189782                          | ND                        | ND                        | No           |
| F10A1               | AIDLFTDAIK      | Yes               | 553.81                 | 922.5                 | 19.40                       | 72.4                      | 26.9                | 572031                          | ND                        | ND                        | No           |
| F10A1               | AIEINPDSAQPYK   | Yes               | 723.37                 | 314.2                 | 12.13                       | 94.3                      | 34.3                | 408722                          | ND                        | ND                        | No           |
| F10A1               | AIEINPDSAQPYK   | Yes               | 723.37                 | 407.2                 | 12.13                       | 94.3                      | 34.3                | 192727                          | ND                        | ND                        | No           |
| F10A1               | AIEINPDSAQPYK   | Yes               | 723.37                 | 427.3                 | 12.13                       | 94.3                      | 31.3                | 103245                          | ND                        | ND                        | No           |
| F10A1               | AIEINPDSAQPYK   | Yes               | 723.37                 | 905.4                 | 12.13                       | 94.3                      | 34.3                | 220982                          | ND                        | ND                        | No           |
| F10A1               | LQKPNAAIR       | Yes               | 337.54                 | 359.2                 | 7.34                        | 44.5                      | 23.8                | 6030                            | ND                        | ND                        | No           |
| F10A1               | LQKPNAAIR       | Yes               | 337.54                 | 430.3                 | 7.34                        | 44.5                      | 23.8                | 6383                            | ND                        | ND                        | No           |
| F10A1               | LQKPNAAIR       | Yes               | 337.54                 | 544.3                 | 7.34                        | 44.5                      | 23.8                | 5425                            | ND                        | ND                        | No           |
| F10A1               | LQKPNAAIR       | Yes               | 337.54                 | 641.4                 | 7.34                        | 44.5                      | 20.8                | 26173                           | 2385                      | 2333                      | No           |
| F10A1               | YQSNPK          | Yes               | 368.69                 | 292.1                 | 5.30                        | 48.6                      | 15.7                | 31677                           | ND                        | ND                        | No           |
| F10A1               | YQSNPK          | Yes               | 368.69                 | 445.2                 | 5.30                        | 48.6                      | 18.7                | 93292                           | ND                        | ND                        | No           |
| F10A1               | YQSNPK          | Yes               | 368.69                 | 493.2                 | 5.30                        | 48.6                      | 18.7                | 1929                            | ND                        | ND                        | No           |
| F10A1               | YQSNPK          | Yes               | 368.69                 | 573.3                 | 5.30                        | 48.6                      | 18.7                | 40205                           | ND                        | ND                        | No           |
| FAM3C               | GINVALANGK      | Yes               | 478.78                 | 502.3                 | 10.94                       | 62.8                      | 23.6                | 23538                           | ND                        | ND                        | No           |
| FAM3C               | GINVALANGK      | Yes               | 478.78                 | 573.3                 | 10.94                       | 62.8                      | 23.6                | 57540                           | ND                        | ND                        | No           |
| FAM3C               | GINVALANGK      | Yes               | 478.78                 | 672.4                 | 10.94                       | 62.8                      | 23.6                | 12670                           | ND                        | ND                        | No           |
| FAM3C               | GINVALANGK      | Yes               | 478.78                 | 786.4                 | 10.94                       | 62.8                      | 23.6                | 26251                           | ND                        | ND                        | No           |

**Table S5.** MRM assay of individual proteins.

| Protein<br>(_HUMAN) | Peptide                 | MS/MS<br>spectrum | Precursor ion<br>(m/z) | Fragment ion<br>(m/z) | Retention time<br>(minutes) | Declustering<br>potential | Collision<br>energy | Area of<br>synthetic<br>peptide | Area in control<br>sample | Area in disease<br>sample | Interference |
|---------------------|-------------------------|-------------------|------------------------|-----------------------|-----------------------------|---------------------------|---------------------|---------------------------------|---------------------------|---------------------------|--------------|
| FAM3C               | LVVAVAVFLLLTFYVISQVFEIK | No                |                        |                       |                             |                           |                     |                                 |                           |                           |              |
| FAM3C               | SALDTAAR                | Yes               | 402.71                 | 317.2                 | 6.77                        | 52.9                      | 17.2                | 8208                            | ND                        | ND                        | No           |
| FAM3C               | SALDTAAR                | Yes               | 402.71                 | 533.3                 | 6.77                        | 52.9                      | 23.2                | 61136                           | ND                        | ND                        | No           |
| FAM3C               | SALDTAAR                | Yes               | 402.71                 | 646.4                 | 6.77                        | 52.9                      | 20.2                | 45390                           | ND                        | ND                        | No           |
| FAM3C               | SALDTAAR                | Yes               | 402.71                 | 717.4                 | 6.77                        | 52.9                      | 20.2                | 1620                            | ND                        | ND                        | No           |
| FAM3C               | SPFEQHIK                | Yes               | 493.26                 | 525.3                 | 8.62                        | 64.6                      | 27.2                | 23202                           | ND                        | ND                        | No           |
| FAM3C               | SPFEQHIK                | Yes               | 493.26                 | 654.4                 | 8.62                        | 64.6                      | 27.2                | 48767                           | ND                        | ND                        | No           |
| FAM3C               | SPFEQHIK                | Yes               | 493.26                 | 801.4                 | 8.62                        | 64.6                      | 24.2                | 57377                           | ND                        | ND                        | No           |
| FAM3C               | SPFEQHIK                | Yes               | 493.26                 | 839.4                 | 8.62                        | 64.6                      | 24.2                | 13692                           | ND                        | ND                        | No           |
| FAM3C               | TGEVLDTK                | Yes               | 431.73                 | 476.3                 | 7.46                        | 56.7                      | 21.5                | 323199                          | ND                        | ND                        | No           |
| FAM3C               | TGEVLDTK                | Yes               | 431.73                 | 575.3                 | 7.46                        | 56.7                      | 21.5                | 398328                          | ND                        | ND                        | No           |
| FAM3C               | TGEVLDTK                | Yes               | 431.73                 | 704.4                 | 7.46                        | 56.7                      | 21.5                | 318410                          | ND                        | ND                        | No           |
| FAM3C               | TGEVLDTK                | Yes               | 431.73                 | 761.4                 | 7.46                        | 56.7                      | 21.5                | 356025                          | ND                        | ND                        | No           |
| FAS                 | GNAGQSNYGFANSAMER       | Yes               | 887.4                  | 1145.5                | 14.50                       | 100                       | 44.5                | ND                              | ND                        | ND                        | No           |
| FAS                 | GNAGQSNYGFANSAMER       | Yes               | 887.4                  | 707.3                 | 14.50                       | 100                       | 44.5                | ND                              | ND                        | ND                        | No           |
| FAS                 | GNAGQSNYGFANSAMER       | Yes               | 887.4                  | 778.4                 | 14.50                       | 100                       | 44.5                | ND                              | ND                        | ND                        | No           |
| FAS                 | GNAGQSNYGFANSAMER       | Yes               | 887.4                  | 982.4                 | 14.50                       | 100                       | 44.5                | ND                              | ND                        | ND                        | No           |
| FAS                 | LPEDPLLSGLLDSPALK       | Yes               | 889.5                  | 1000.6                | 26.80                       | 100                       | 44.6                | ND                              | ND                        | ND                        | No           |
| FAS                 | LPEDPLLSGLLDSPALK       | Yes               | 889.5                  | 455.2                 | 26.80                       | 100                       | 44.6                | ND                              | ND                        | ND                        | No           |
| FAS                 | LPEDPLLSGLLDSPALK       | Yes               | 889.5                  | 515.3                 | 26.80                       | 100                       | 44.6                | ND                              | ND                        | ND                        | No           |
| FAS                 | LPEDPLLSGLLDSPALK       | Yes               | 889.5                  | 913.5                 | 26.80                       | 100                       | 44.6                | ND                              | ND                        | ND                        | No           |
| FAS                 | LQVVDQPLPVR             | Yes               | 632.4                  | 1022.6                | 13.18                       | 100                       | 33.3                | ND                              | ND                        | ND                        | No           |
| FAS                 | LQVVDQPLPVR             | Yes               | 632.4                  | 242.2                 | 13.18                       | 100                       | 33.3                | ND                              | ND                        | ND                        | No           |



**Table S5.** MRM assay of individual proteins.

| Protein<br>(_HUMAN) | Peptide       | MS/MS<br>spectrum | Precursor ion<br>(m/z) | Fragment ion<br>(m/z) | Retention time<br>(minutes) | Decustering<br>potential | Collision<br>energy | Area of<br>synthetic<br>peptide | Area in control<br>sample | Area in disease<br>sample | Interference |
|---------------------|---------------|-------------------|------------------------|-----------------------|-----------------------------|--------------------------|---------------------|---------------------------------|---------------------------|---------------------------|--------------|
| FAS                 | LQVVDQPLPVR   | Yes               | 632.4                  | 581.4                 | 13.18                       | 100                      | 33.3                | ND                              | ND                        | ND                        | No           |
| FAS                 | LQVVDQPLPVR   | Yes               | 632.4                  | 923.5                 | 13.18                       | 100                      | 33.3                | ND                              | ND                        | ND                        | No           |
| FAS                 | MVVPGLDGAQIPR | Yes               | 676.9                  | 1023.6                | 19.20                       | 100                      | 35.3                | ND                              | ND                        | ND                        | No           |
| FAS                 | MVVPGLDGAQIPR | Yes               | 676.9                  | 512.3                 | 19.20                       | 100                      | 35.3                | ND                              | ND                        | ND                        | No           |
| FAS                 | MVVPGLDGAQIPR | Yes               | 676.9                  | 561.8                 | 19.20                       | 100                      | 35.3                | ND                              | ND                        | ND                        | No           |
| FAS                 | MVVPGLDGAQIPR | Yes               | 676.9                  | 641.4                 | 19.20                       | 100                      | 35.3                | ND                              | ND                        | ND                        | No           |
| FAS                 | SEGVVAVLLTK   | Yes               | 558.3                  | 373.2                 | 19.80                       | 100                      | 30.1                | ND                              | 15703                     | 18358                     | No           |
| FAS                 | SEGVVAVLLTK   | Yes               | 558.3                  | 644.4                 | 19.80                       | 100                      | 30.1                | ND                              | 13257                     | 19030                     | No           |
| FAS                 | SEGVVAVLLTK   | Yes               | 558.3                  | 743.5                 | 19.80                       | 100                      | 30.1                | ND                              | ND                        | ND                        | No           |
| FAS                 | SEGVVAVLLTK   | Yes               | 558.3                  | 899.6                 | 19.80                       | 100                      | 30.1                | ND                              | ND                        | ND                        | No           |
| FAS                 | VLEALLPLK     | Yes               | 498.329                | 213.16                | 17.93                       | 100                      | 21.4                | ND                              | 28550                     | 28826                     | No           |
| FAS                 | VLEALLPLK     | Yes               | 498.329                | 357.3                 | 17.93                       | 100                      | 27.4                | ND                              | 6268                      | ND                        | No           |
| FAS                 | VLEALLPLK     | Yes               | 498.329                | 654.5                 | 17.93                       | 100                      | 27.4                | ND                              | ND                        | ND                        | No           |
| FAS                 | VLEALLPLK     | Yes               | 498.329                | 783.498               | 17.93                       | 100                      | 24.4                | ND                              | 6983                      | 5103                      | No           |
| FCGR1               | GWLLQVSSR     | No                |                        |                       |                             |                          |                     |                                 |                           |                           |              |
| FCGR1               | HLEELK        | Yes               | 449.24                 | 260.2                 | 7.56                        | 59                       | 25.3                | 340537                          | 2110                      | 4383                      | No           |
| FCGR1               | HLEELK        | Yes               | 449.24                 | 638.3                 | 7.56                        | 59                       | 25.3                | 227886                          | 2374                      | ND                        | No           |
| FCGR1               | HLEELK        | Yes               | 449.24                 | 647.3                 | 7.56                        | 59                       | 22.3                | 77002                           | ND                        | ND                        | No           |
| FCGR1               | HLEELK        | Yes               | 449.24                 | 760.4                 | 7.56                        | 59                       | 22.3                | 73769                           | ND                        | ND                        | No           |
| FCGR1               | LVYNVLYYR     | Yes               | 601.83                 | 501.2                 | 17.52                       | 78.6                     | 29                  | 58433                           | ND                        | ND                        | No           |
| FCGR1               | LVYNVLYYR     | Yes               | 601.83                 | 713.4                 | 17.52                       | 78.6                     | 29                  | 26965                           | ND                        | ND                        | No           |
| FCGR1               | LVYNVLYYR     | Yes               | 601.83                 | 827.4                 | 17.52                       | 78.6                     | 38                  | 59326                           | ND                        | ND                        | No           |
| FCGR1               | LVYNVLYYR     | Yes               | 601.83                 | 990.5                 | 17.52                       | 78.6                     | 29                  | 87290                           | ND                        | ND                        | No           |

**Table S5.** MRM assay of individual proteins.

| Protein<br>(_HUMAN) | Peptide             | MS/MS<br>spectrum | Precursor ion<br>(m/z) | Fragment ion<br>(m/z) | Retention time<br>(minutes) | Declustering<br>potential | Collision<br>energy | Area of<br>synthetic<br>peptide | Area in control<br>sample | Area in disease<br>sample | Interference |
|---------------------|---------------------|-------------------|------------------------|-----------------------|-----------------------------|---------------------------|---------------------|---------------------------------|---------------------------|---------------------------|--------------|
| FCGR1               | VFTEGEPLALR         | Yes               | 616.34                 | 569.4                 | 15.36                       | 80.5                      | 38.6                | 198000                          | ND                        | ND                        | No           |
| FCGR1               | VFTEGEPLALR         | Yes               | 616.34                 | 755.4                 | 15.36                       | 80.5                      | 38.6                | 162685                          | ND                        | ND                        | No           |
| FCGR1               | VFTEGEPLALR         | Yes               | 616.34                 | 884.5                 | 15.36                       | 80.5                      | 38.6                | 32375                           | ND                        | ND                        | No           |
| FCGR1               | VFTEGEPLALR         | Yes               | 616.34                 | 985.5                 | 15.36                       | 80.5                      | 29.6                | 78184                           | ND                        | ND                        | No           |
| FCGR1               | YTSAGISVTVK         | Yes               | 563.31                 | 533.3                 | 11.56                       | 73.7                      | 24.3                | 33544                           | ND                        | ND                        | No           |
| FCGR1               | YTSAGISVTVK         | Yes               | 563.31                 | 703.4                 | 11.56                       | 73.7                      | 30.3                | 54360                           | ND                        | ND                        | No           |
| FCGR1               | YTSAGISVTVK         | Yes               | 563.31                 | 774.5                 | 11.56                       | 73.7                      | 27.3                | 31140                           | ND                        | ND                        | No           |
| FCGR1               | YTSAGISVTVK         | Yes               | 563.31                 | 861.5                 | 11.56                       | 73.7                      | 27.3                | 83725                           | ND                        | ND                        | No           |
| FGF10               | IEENGYNTYASFNWQHNGR | Yes               | 767.34                 | 483.2                 | 15.04                       | 100                       | 39.7                | 1893                            | ND                        | ND                        | No           |
| FGF10               | IEENGYNTYASFNWQHNGR | Yes               | 767.34                 | 486.2                 | 15.04                       | 100                       | 45.7                | 2705                            | ND                        | ND                        | No           |
| FGF10               | IEENGYNTYASFNWQHNGR | Yes               | 767.34                 | 543.2                 | 15.04                       | 100                       | 45.7                | 1841                            | ND                        | ND                        | No           |
| FGF10               | IEENGYNTYASFNWQHNGR | Yes               | 767.34                 | 797.4                 | 15.04                       | 100                       | 36.7                | 3547                            | ND                        | ND                        | No           |
| FGF10               | SYNHLQGDVR          | Yes               | 396.86                 | 274.2                 | 7.64                        | 52.2                      | 26.8                | 109849                          | ND                        | ND                        | No           |
| FGF10               | SYNHLQGDVR          | Yes               | 396.86                 | 446.2                 | 7.64                        | 52.2                      | 20.8                | 14466                           | ND                        | ND                        | No           |
| FGF10               | SYNHLQGDVR          | Yes               | 396.86                 | 574.3                 | 7.64                        | 52.2                      | 26.8                | 15544                           | ND                        | ND                        | No           |
| FGF10               | SYNHLQGDVR          | Yes               | 396.86                 | 687.4                 | 7.64                        | 52.2                      | 23.8                | 10073                           | ND                        | ND                        | No           |
| FGF2                | LESNNYNTYR          | Yes               | 637.29                 | 553.3                 | 8.13                        | 83.2                      | 30.5                | 14632                           | ND                        | ND                        | No           |
| FGF2                | LESNNYNTYR          | Yes               | 637.29                 | 716.3                 | 8.13                        | 83.2                      | 39.5                | 6892                            | ND                        | ND                        | No           |
| FGF2                | LESNNYNTYR          | Yes               | 637.29                 | 830.4                 | 8.13                        | 83.2                      | 30.5                | 5414                            | ND                        | ND                        | No           |
| FGF2                | LESNNYNTYR          | Yes               | 637.29                 | 944.4                 | 8.13                        | 83.2                      | 33.5                | 3719                            | ND                        | ND                        | No           |
| FGF2                | LQLQAEER            | Yes               | 493.77                 | 355.2                 | 9.15                        | 64.7                      | 24.2                | 15664                           | ND                        | ND                        | No           |
| FGF2                | LQLQAEER            | Yes               | 493.77                 | 433.2                 | 9.15                        | 64.7                      | 27.2                | 10139                           | ND                        | ND                        | No           |
| FGF2                | LQLQAEER            | Yes               | 493.77                 | 632.3                 | 9.15                        | 64.7                      | 24.2                | 27638                           | ND                        | ND                        | No           |

**Table S5.** MRM assay of individual proteins.

| Protein<br>(_HUMAN) | Peptide           | MS/MS<br>spectrum | Precursor ion<br>(m/z) | Fragment ion<br>(m/z) | Retention time<br>(minutes) | Decustering<br>potential | Collision<br>energy | Area of<br>synthetic<br>peptide | Area in control<br>sample | Area in disease<br>sample | Interference |
|---------------------|-------------------|-------------------|------------------------|-----------------------|-----------------------------|--------------------------|---------------------|---------------------------------|---------------------------|---------------------------|--------------|
| FGF2                | LQLQAEER          | Yes               | 493.77                 | 745.4                 | 9.15                        | 64.7                     | 24.2                | 82344                           | ND                        | ND                        | No           |
| FGF2                | NGGFFLR           | Yes               | 405.72                 | 288.2                 | 15.25                       | 53.3                     | 26.4                | 236086                          | ND                        | ND                        | No           |
| FGF2                | NGGFFLR           | Yes               | 405.72                 | 435.3                 | 15.25                       | 53.3                     | 20.4                | 180822                          | ND                        | ND                        | No           |
| FGF2                | NGGFFLR           | Yes               | 405.72                 | 639.4                 | 15.25                       | 53.3                     | 20.4                | 79566                           | ND                        | ND                        | No           |
| FGF2                | NGGFFLR           | Yes               | 405.72                 | 696.4                 | 15.25                       | 53.3                     | 20.4                | 72112                           | ND                        | ND                        | No           |
| FGF7                | ELILENHYNTYASAK   | Yes               | 589.3                  | 305.2                 | 13.21                       | 77                       | 36.6                | 183207                          | ND                        | ND                        | No           |
| FGF7                | ELILENHYNTYASAK   | Yes               | 589.3                  | 376.2                 | 13.21                       | 77                       | 36.6                | 43676                           | ND                        | ND                        | No           |
| FGF7                | ELILENHYNTYASAK   | Yes               | 589.3                  | 640.3                 | 13.21                       | 77                       | 27.6                | 85427                           | ND                        | ND                        | No           |
| FGF7                | ELILENHYNTYASAK   | Yes               | 589.3                  | 754.4                 | 13.21                       | 77                       | 36.6                | 28332                           | ND                        | ND                        | No           |
| FGF7                | TQWYLR            | No                |                        |                       |                             |                          |                     |                                 |                           |                           |              |
| FGF7                | TVAVGIVAIK        | No                |                        |                       |                             |                          |                     |                                 |                           |                           |              |
| FGF7                | WILTWILPTLLYR     | Yes               | 844.5                  | 514.3                 | 25.06                       | 109.9                    | 36.7                | ND                              | ND                        | ND                        | No           |
| FGF7                | WILTWILPTLLYR     | Yes               | 844.5                  | 762.5                 | 25.06                       | 109.9                    | 39.7                | 1996                            | ND                        | ND                        | No           |
| FGF7                | WILTWILPTLLYR     | Yes               | 844.5                  | 875.5                 | 25.06                       | 109.9                    | 39.7                | 1701                            | ND                        | ND                        | No           |
| FGF7                | WILTWILPTLLYR     | Yes               | 844.5                  | 988.6                 | 25.06                       | 109.9                    | 39.7                | 1352                            | ND                        | ND                        | No           |
| FGF9                | EQFEENWYNTYSSNLYK | Yes               | 1107.98                | 537.3                 | 18.62                       | 143.9                    | 60.3                | 3614                            | ND                        | ND                        | No           |
| FGF9                | EQFEENWYNTYSSNLYK | Yes               | 1107.98                | 711.4                 | 18.62                       | 143.9                    | 51.3                | 12390                           | ND                        | ND                        | No           |
| FGF9                | EQFEENWYNTYSSNLYK | Yes               | 1107.98                | 874.4                 | 18.62                       | 143.9                    | 48.3                | 6068                            | ND                        | ND                        | No           |
| FGF9                | EQFEENWYNTYSSNLYK | Yes               | 1107.98                | 975.5                 | 18.62                       | 143.9                    | 51.3                | 6444                            | ND                        | ND                        | No           |
| FGF9                | FGILEFISIAVGLVSIR | No                |                        |                       |                             |                          |                     |                                 |                           |                           |              |
| FGF9                | FTHFLRPVDPDK      | Yes               | 523.61                 | 359.2                 | 12.77                       | 68.5                     | 27.3                | 1196128                         | ND                        | ND                        | No           |
| FGF9                | FTHFLRPVDPDK      | Yes               | 523.61                 | 386.2                 | 12.77                       | 68.5                     | 27.3                | 145839                          | ND                        | ND                        | No           |
| FGF9                | FTHFLRPVDPDK      | Yes               | 523.61                 | 474.2                 | 12.77                       | 68.5                     | 27.3                | 35138                           | ND                        | ND                        | No           |

**Table S5.** MRM assay of individual proteins.

| Protein<br>(_HUMAN) | Peptide      | MS/MS<br>spectrum | Precursor ion<br>(m/z) | Fragment ion<br>(m/z) | Retention time<br>(minutes) | Declustering<br>potential | Collision<br>energy | Area of<br>synthetic<br>peptide | Area in control<br>sample | Area in disease<br>sample | Interference                       |
|---------------------|--------------|-------------------|------------------------|-----------------------|-----------------------------|---------------------------|---------------------|---------------------------------|---------------------------|---------------------------|------------------------------------|
| FGF9                | FTHFLRPVDPDK | Yes               | 523.61                 | 646.3                 | 12.77                       | 68.5                      | 24.3                | 25476                           | ND                        | ND                        | No                                 |
| FGF9                | GELYGSEK     | Yes               | 441.71                 | 300.2                 | 7.34                        | 58                        | 18.9                | 257454                          | ND                        | ND                        | No                                 |
| FGF9                | GELYGSEK     | Yes               | 441.71                 | 420.2                 | 7.34                        | 58                        | 24.9                | 430201                          | ND                        | 5894                      | No                                 |
| FGF9                | GELYGSEK     | Yes               | 441.71                 | 583.3                 | 7.34                        | 58                        | 21.9                | 546511                          | ND                        | ND                        | No                                 |
| FGF9                | GELYGSEK     | Yes               | 441.71                 | 696.4                 | 7.34                        | 58                        | 21.9                | 449118                          | ND                        | ND                        | No                                 |
| FGF9                | GPAVTDLHLK   | Yes               | 389.21                 | 512.3                 | 11.97                       | 51.2                      | 20.4                | 153580                          | 1230                      | 4907                      | No                                 |
| FGF9                | GPAVTDLHLK   | Yes               | 389.21                 | 625.4                 | 11.97                       | 51.2                      | 26.4                | 125532                          | 2891                      | 6598                      | No                                 |
| FGF9                | GPAVTDLHLK   | Yes               | 389.21                 | 740.4                 | 11.97                       | 51.2                      | 17.4                | 85383                           | ND                        | 1198                      | No                                 |
| FGF9                | GPAVTDLHLK   | Yes               | 389.21                 | 841.4                 | 11.97                       | 51.2                      | 26.4                | 1218                            | ND                        | ND                        | No                                 |
| FGFR2               | EIEVLYIR     | Yes               | 517.8                  | 451.3                 | 17.23                       | 67.8                      | 25.3                | 51145                           | 21240                     | 22725                     | No                                 |
| FGFR2               | EIEVLYIR     | Yes               | 517.8                  | 564.4                 | 17.23                       | 67.8                      | 25.3                | ND                              | ND                        | ND                        | Yes (Based on<br>Manual<br>Review) |
| FGFR2               | EIEVLYIR     | Yes               | 517.8                  | 663.4                 | 17.23                       | 67.8                      | 34.3                | 20438                           | 16510                     | 16602                     | No                                 |
| FGFR2               | EIEVLYIR     | Yes               | 517.8                  | 792.5                 | 17.23                       | 67.8                      | 25.3                | 34827                           | 6047                      | 11105                     | No                                 |
| FGFR2               | QLVEDLDR     | Yes               | 494.26                 | 518.3                 | 11.25                       | 64.8                      | 24.2                | 14993                           | ND                        | ND                        | No                                 |
| FGFR2               | QLVEDLDR     | Yes               | 494.26                 | 647.3                 | 11.25                       | 64.8                      | 24.2                | 20398                           | ND                        | ND                        | No                                 |
| FGFR2               | QLVEDLDR     | Yes               | 494.26                 | 746.4                 | 11.25                       | 64.8                      | 33.2                | 20939                           | ND                        | ND                        | No                                 |
| FGFR2               | QLVEDLDR     | Yes               | 494.26                 | 859.5                 | 11.25                       | 64.8                      | 33.2                | 2040                            | ND                        | ND                        | No                                 |
| FGFR2               | TVLIGEYLQIK  | Yes               | 638.88                 | 314.2                 | 20.32                       | 83.4                      | 30.6                | 26171                           | ND                        | ND                        | No                                 |
| FGFR2               | TVLIGEYLQIK  | Yes               | 638.88                 | 793.4                 | 20.32                       | 83.4                      | 30.6                | 3361                            | ND                        | ND                        | No                                 |
| FGFR2               | TVLIGEYLQIK  | Yes               | 638.88                 | 850.5                 | 20.32                       | 83.4                      | 30.6                | 20889                           | ND                        | 3356                      | No                                 |
| FGFR2               | TVLIGEYLQIK  | Yes               | 638.88                 | 963.6                 | 20.32                       | 83.4                      | 30.6                | 6521                            | ND                        | ND                        | No                                 |
| FGFR2               | YGPDGLPYLK   | Yes               | 561.8                  | 520.3                 | 15.81                       | 73.5                      | 33.2                | 233341                          | ND                        | ND                        | No                                 |

**Table S5.** MRM assay of individual proteins.

| Protein<br>(_HUMAN) | Peptide                | MS/MS<br>spectrum | Precursor ion<br>(m/z) | Fragment ion<br>(m/z) | Retention time<br>(minutes) | Decustering<br>potential | Collision<br>energy | Area of<br>synthetic<br>peptide | Area in control<br>sample | Area in disease<br>sample | Interference |
|---------------------|------------------------|-------------------|------------------------|-----------------------|-----------------------------|--------------------------|---------------------|---------------------------------|---------------------------|---------------------------|--------------|
| FGFR2               | YGPDGLPYLK             | Yes               | 561.8                  | 690.4                 | 15.81                       | 73.5                     | 27.2                | 88367                           | ND                        | ND                        | No           |
| FGFR2               | YGPDGLPYLK             | Yes               | 561.8                  | 805.4                 | 15.81                       | 73.5                     | 30.2                | 101872                          | ND                        | ND                        | No           |
| FGFR2               | YGPDGLPYLK             | Yes               | 561.8                  | 959.5                 | 15.81                       | 73.5                     | 36.2                | 22783                           | ND                        | ND                        | No           |
| FGFR2               | YQISQPEVYVAAPGESLEVR   | Yes               | 745.71                 | 274.2                 | 17.21                       | 97.2                     | 35.6                | 3807                            | ND                        | ND                        | No           |
| FGFR2               | YQISQPEVYVAAPGESLEVR   | Yes               | 745.71                 | 292.1                 | 17.21                       | 97.2                     | 35.6                | 8138                            | ND                        | ND                        | No           |
| FGFR2               | YQISQPEVYVAAPGESLEVR   | Yes               | 745.71                 | 789.4                 | 17.21                       | 97.2                     | 41.6                | 3718                            | ND                        | ND                        | No           |
| FGFR2               | YQISQPEVYVAAPGESLEVR   | Yes               | 745.71                 | 886.5                 | 17.21                       | 97.2                     | 32.6                | 13817                           | ND                        | ND                        | No           |
| FGFR3               | DGTGLVPSER             | Yes               | 515.76                 | 488.2                 | 9.53                        | 67.5                     | 25.2                | 279428                          | ND                        | ND                        | No           |
| FGFR3               | DGTGLVPSER             | Yes               | 515.76                 | 587.3                 | 9.53                        | 67.5                     | 25.2                | 116643                          | ND                        | ND                        | No           |
| FGFR3               | DGTGLVPSER             | Yes               | 515.76                 | 700.4                 | 9.53                        | 67.5                     | 34.2                | 20119                           | ND                        | ND                        | No           |
| FGFR3               | DGTGLVPSER             | Yes               | 515.76                 | 757.4                 | 9.53                        | 67.5                     | 34.2                | 55073                           | ND                        | ND                        | No           |
| FGFR3               | LSSGEGPTLANVSELELPADPK | Yes               | 742.05                 | 527.3                 | 18.67                       | 96.7                     | 35.4                | 16898                           | ND                        | ND                        | No           |
| FGFR3               | LSSGEGPTLANVSELELPADPK | Yes               | 742.05                 | 640.4                 | 18.67                       | 96.7                     | 35.4                | 9393                            | ND                        | ND                        | No           |
| FGFR3               | LSSGEGPTLANVSELELPADPK | Yes               | 742.05                 | 769.4                 | 18.67                       | 96.7                     | 35.4                | 7431                            | ND                        | ND                        | No           |
| FGFR3               | LSSGEGPTLANVSELELPADPK | Yes               | 742.05                 | 882.5                 | 18.67                       | 96.7                     | 35.4                | 3841                            | ND                        | ND                        | No           |
| FGFR3               | QLVEDLDR               | Yes               | 494.26                 | 518.3                 | 11.25                       | 64.8                     | 24.2                | 14993                           | ND                        | ND                        | No           |
| FGFR3               | QLVEDLDR               | Yes               | 494.26                 | 647.3                 | 11.25                       | 64.8                     | 24.2                | 20398                           | ND                        | ND                        | No           |
| FGFR3               | QLVEDLDR               | Yes               | 494.26                 | 746.4                 | 11.25                       | 64.8                     | 33.2                | 20939                           | ND                        | ND                        | No           |
| FGFR3               | QLVEDLDR               | Yes               | 494.26                 | 859.5                 | 11.25                       | 64.8                     | 33.2                | 2040                            | ND                        | ND                        | No           |
| FGFR3               | TAGANTTDK              | Yes               | 439.71                 | 578.3                 | 5.22                        | 57.7                     | 24.8                | 34724                           | ND                        | ND                        | No           |
| FGFR3               | TAGANTTDK              | Yes               | 439.71                 | 649.3                 | 5.22                        | 57.7                     | 24.8                | 21721                           | ND                        | ND                        | No           |
| FGFR3               | TAGANTTDK              | Yes               | 439.71                 | 706.3                 | 5.22                        | 57.7                     | 21.8                | 326122                          | ND                        | ND                        | No           |
| FGFR3               | TAGANTTDK              | Yes               | 439.71                 | 777.4                 | 5.22                        | 57.7                     | 21.8                | 44560                           | ND                        | ND                        | No           |

**Table S5.** MRM assay of individual proteins.

| Protein<br>(_HUMAN) | Peptide           | MS/MS<br>spectrum | Precursor ion<br>(m/z) | Fragment ion<br>(m/z) | Retention time<br>(minutes) | Decustering<br>potential | Collision<br>energy | Area of<br>synthetic<br>peptide | Area in control<br>sample | Area in disease<br>sample | Interference |
|---------------------|-------------------|-------------------|------------------------|-----------------------|-----------------------------|--------------------------|---------------------|---------------------------------|---------------------------|---------------------------|--------------|
| FGFR3               | VGPDGTPYVTVLK     | Yes               | 673.37                 | 527.2                 | 14.85                       | 87.9                     | 32.1                | 109094                          | ND                        | ND                        | No           |
| FGFR3               | VGPDGTPYVTVLK     | Yes               | 673.37                 | 624.3                 | 14.85                       | 87.9                     | 32.1                | 123855                          | ND                        | ND                        | No           |
| FGFR3               | VGPDGTPYVTVLK     | Yes               | 673.37                 | 819.5                 | 14.85                       | 87.9                     | 32.1                | 435767                          | ND                        | ND                        | No           |
| FGFR3               | VGPDGTPYVTVLK     | Yes               | 673.37                 | 977.6                 | 14.85                       | 87.9                     | 41.1                | 59252                           | ND                        | ND                        | No           |
| FGL2                | ELESEVNK          | Yes               | 474.24                 | 261.2                 | 6.85                        | 62.2                     | 32.4                | 385689                          | ND                        | ND                        | No           |
| FGL2                | ELESEVNK          | Yes               | 474.24                 | 576.3                 | 6.85                        | 62.2                     | 23.4                | 439142                          | ND                        | ND                        | No           |
| FGL2                | ELESEVNK          | Yes               | 474.24                 | 687.3                 | 6.85                        | 62.2                     | 26.4                | 102265                          | ND                        | ND                        | No           |
| FGL2                | ELESEVNK          | Yes               | 474.24                 | 705.3                 | 6.85                        | 62.2                     | 23.4                | 207094                          | ND                        | ND                        | No           |
| FGL2                | LHVGNYNGTAGDALR   | Yes               | 779.39                 | 251.2                 | 11.37                       | 101.5                    | 42.8                | 77385                           | ND                        | ND                        | No           |
| FGL2                | LHVGNYNGTAGDALR   | Yes               | 779.39                 | 350.2                 | 11.37                       | 101.5                    | 42.8                | 23924                           | ND                        | ND                        | No           |
| FGL2                | LHVGNYNGTAGDALR   | Yes               | 779.39                 | 359.2                 | 11.37                       | 101.5                    | 45.8                | 17649                           | ND                        | ND                        | No           |
| FGL2                | LHVGNYNGTAGDALR   | Yes               | 779.39                 | 874.4                 | 11.37                       | 101.5                    | 39.8                | 2787                            | ND                        | ND                        | No           |
| FGL2                | LQADDNGDPGR       | Yes               | 579.26                 | 313.2                 | 5.87                        | 75.7                     | 28                  | 9746                            | ND                        | ND                        | No           |
| FGL2                | LQADDNGDPGR       | Yes               | 579.26                 | 329.2                 | 5.87                        | 75.7                     | 34                  | 110167                          | ND                        | ND                        | No           |
| FGL2                | LQADDNGDPGR       | Yes               | 579.26                 | 845.3                 | 5.87                        | 75.7                     | 34                  | 9261                            | ND                        | ND                        | No           |
| FGL2                | LQADDNGDPGR       | Yes               | 579.26                 | 916.4                 | 5.87                        | 75.7                     | 28                  | 34730                           | ND                        | ND                        | No           |
| FGL2                | NGLLLSTGAPGEVGDNR | Yes               | 883.96                 | 285.2                 | 15.26                       | 115                      | 47.4                | 178497                          | ND                        | ND                        | No           |
| FGL2                | NGLLLSTGAPGEVGDNR | Yes               | 883.96                 | 398.2                 | 15.26                       | 115                      | 41.4                | 79881                           | ND                        | ND                        | No           |
| FGL2                | NGLLLSTGAPGEVGDNR | Yes               | 883.96                 | 511.3                 | 15.26                       | 115                      | 38.4                | 54188                           | ND                        | ND                        | No           |
| FGL2                | NGLLLSTGAPGEVGDNR | Yes               | 883.96                 | 843.4                 | 15.26                       | 115                      | 47.4                | 18873                           | ND                        | ND                        | No           |
| FGL2                | VANLTFVNSLDGK     | Yes               | 738.91                 | 285.2                 | 20.54                       | 96.3                     | 38                  | 21300                           | ND                        | ND                        | No           |
| FGL2                | VANLTFVNSLDGK     | Yes               | 738.91                 | 499.3                 | 20.54                       | 96.3                     | 32                  | 5166                            | ND                        | ND                        | No           |
| FGL2                | VANLTFVNSLDGK     | Yes               | 738.91                 | 831.5                 | 20.54                       | 96.3                     | 35                  | 9259                            | ND                        | ND                        | No           |

**Table S5.** MRM assay of individual proteins.

| Protein<br>(_HUMAN) | Peptide            | MS/MS<br>spectrum | Precursor ion<br>(m/z) | Fragment ion<br>(m/z) | Retention time<br>(minutes) | Declustering<br>potential | Collision<br>energy | Area of<br>synthetic<br>peptide | Area in control<br>sample | Area in disease<br>sample | Interference |
|---------------------|--------------------|-------------------|------------------------|-----------------------|-----------------------------|---------------------------|---------------------|---------------------------------|---------------------------|---------------------------|--------------|
| FGL2                | VANLTFVVNSLDGK     | Yes               | 738.91                 | 978.5                 | 20.54                       | 96.3                      | 38                  | 8010                            | ND                        | ND                        | No           |
| FHIT                | EDFPASWR           | No                |                        |                       |                             |                           |                     |                                 |                           |                           |              |
| FHIT                | FGQHLIKPSVVFLK     | Yes               | 538.32                 | 583.3                 | 16.39                       | 70.4                      | 31                  | 33627                           | ND                        | ND                        | No           |
| FHIT                | FGQHLIKPSVVFLK     | Yes               | 538.32                 | 692.4                 | 16.39                       | 70.4                      | 28                  | 6722                            | ND                        | ND                        | No           |
| FHIT                | FGQHLIKPSVVFLK     | Yes               | 538.32                 | 696.4                 | 16.39                       | 70.4                      | 28                  | 20202                           | ND                        | ND                        | No           |
| FHIT                | FGQHLIKPSVVFLK     | Yes               | 538.32                 | 789.5                 | 16.39                       | 70.4                      | 25                  | 18357                           | ND                        | ND                        | No           |
| FHIT                | FHDLRPDEVADLFQTTQR | Yes               | 730.03                 | 285.1                 | 18.90                       | 95.2                      | 40.8                | 55166                           | ND                        | ND                        | No           |
| FHIT                | FHDLRPDEVADLFQTTQR | Yes               | 730.03                 | 505.3                 | 18.90                       | 95.2                      | 37.8                | 31304                           | ND                        | ND                        | No           |
| FHIT                | FHDLRPDEVADLFQTTQR | Yes               | 730.03                 | 633.3                 | 18.90                       | 95.2                      | 37.8                | 25649                           | ND                        | ND                        | No           |
| FHIT                | FHDLRPDEVADLFQTTQR | Yes               | 730.03                 | 780.4                 | 18.90                       | 95.2                      | 37.8                | 34383                           | ND                        | ND                        | No           |
| FHIT                | NDSIYEELQK         | Yes               | 619.8                  | 317.1                 | 13.54                       | 81                        | 29.8                | 123167                          | ND                        | ND                        | No           |
| FHIT                | NDSIYEELQK         | Yes               | 619.8                  | 646.3                 | 13.54                       | 81                        | 29.8                | 47158                           | ND                        | ND                        | No           |
| FHIT                | NDSIYEELQK         | Yes               | 619.8                  | 809.4                 | 13.54                       | 81                        | 29.8                | 203022                          | ND                        | ND                        | No           |
| FHIT                | NDSIYEELQK         | Yes               | 619.8                  | 922.5                 | 13.54                       | 81                        | 29.8                | 34240                           | ND                        | ND                        | No           |
| FHIT                | VGTVVEK            | Yes               | 366.22                 | 258.1                 | 6.17                        | 48.2                      | 27.6                | 322881                          | 124324                    | 82128                     | No           |
| FHIT                | VGTVVEK            | Yes               | 366.22                 | 474.3                 | 6.17                        | 48.2                      | 18.6                | 43761                           | ND                        | ND                        | No           |
| FHIT                | VGTVVEK            | Yes               | 366.22                 | 575.3                 | 6.17                        | 48.2                      | 18.6                | 152201                          | ND                        | ND                        | No           |
| FHIT                | VGTVVEK            | Yes               | 366.22                 | 632.4                 | 6.17                        | 48.2                      | 15.6                | 315975                          | 122374                    | 86772                     | No           |
| FIBA                | GGSTSYGTGSETESPR   | Yes               | 786.84                 | 359.2                 | 6.60                        | 102.5                     | 34.1                | 10536                           | 251042                    | 128435                    | No           |
| FIBA                | GGSTSYGTGSETESPR   | Yes               | 786.84                 | 589.3                 | 6.60                        | 102.5                     | 34.1                | 4729                            | 85096                     | 52250                     | No           |
| FIBA                | GGSTSYGTGSETESPR   | Yes               | 786.84                 | 862.4                 | 6.60                        | 102.5                     | 43.1                | 13782                           | 258324                    | 191387                    | No           |
| FIBA                | GGSTSYGTGSETESPR   | Yes               | 786.84                 | 963.4                 | 6.60                        | 102.5                     | 37.1                | 4944                            | 92896                     | 80685                     | No           |
| FIBA                | GLIDEVNQDFTNR      | No                |                        |                       |                             |                           |                     |                                 |                           |                           |              |

**Table S5.** MRM assay of individual proteins.

| Protein<br>(_HUMAN) | Peptide             | MS/MS<br>spectrum | Precursor ion<br>(m/z) | Fragment ion<br>(m/z) | Retention time<br>(minutes) | Declustering<br>potential | Collision<br>energy | Area of<br>synthetic<br>peptide | Area in control<br>sample | Area in disease<br>sample | Interference |
|---------------------|---------------------|-------------------|------------------------|-----------------------|-----------------------------|---------------------------|---------------------|---------------------------------|---------------------------|---------------------------|--------------|
| FIBA                | NSLFEYQK            | Yes               | 514.76                 | 315.2                 | 12.75                       | 67.4                      | 25.1                | 280129                          | 335170                    | 271272                    | No           |
| FIBA                | NSLFEYQK            | Yes               | 514.76                 | 567.3                 | 12.75                       | 67.4                      | 25.1                | 145176                          | 176963                    | 154518                    | No           |
| FIBA                | NSLFEYQK            | Yes               | 514.76                 | 714.3                 | 12.75                       | 67.4                      | 25.1                | 306108                          | 445913                    | 309747                    | No           |
| FIBA                | NSLFEYQK            | Yes               | 514.76                 | 827.4                 | 12.75                       | 67.4                      | 25.1                | 139234                          | 207608                    | 149704                    | No           |
| FIBA                | TVIGPDGHK           | Yes               | 308.5                  | 341.2                 | 6.20                        | 40.8                      | 22.3                | 52939                           | 60633                     | 38900                     | No           |
| FIBA                | TVIGPDGHK           | Yes               | 308.5                  | 456.2                 | 6.20                        | 40.8                      | 22.3                | 43078                           | 46803                     | 25976                     | No           |
| FIBA                | TVIGPDGHK           | Yes               | 308.5                  | 553.3                 | 6.20                        | 40.8                      | 16.3                | 58799                           | 68942                     | 41070                     | No           |
| FIBA                | TVIGPDGHK           | Yes               | 308.5                  | 610.3                 | 6.20                        | 40.8                      | 13.3                | 115226                          | 141698                    | 66202                     | No           |
| FIBA                | VQHIQLLQK           | Yes               | 369.56                 | 501.3                 | 11.15                       | 48.7                      | 19.4                | 41693                           | 37127                     | 15096                     | No           |
| FIBA                | VQHIQLLQK           | Yes               | 369.56                 | 606.3                 | 11.15                       | 48.7                      | 25.4                | 12694                           | 13190                     | 1629                      | No           |
| FIBA                | VQHIQLLQK           | Yes               | 369.56                 | 629.4                 | 11.15                       | 48.7                      | 19.4                | 15393                           | 16804                     | 4338                      | No           |
| FIBA                | VQHIQLLQK           | Yes               | 369.56                 | 742.5                 | 11.15                       | 48.7                      | 16.4                | 10161                           | 7888                      | 3283                      | No           |
| FINC                | HTSVQTTSSGSGPFTDVR  | Yes               | 621.97                 | 274.2                 | 10.99                       | 81.2                      | 38.3                | ND                              | ND                        | ND                        | No           |
| FINC                | HTSVQTTSSGSGPFTDVR  | Yes               | 621.97                 | 734.4                 | 10.99                       | 81.2                      | 29.3                | ND                              | ND                        | ND                        | No           |
| FINC                | HTSVQTTSSGSGPFTDVR  | Yes               | 621.97                 | 878.4                 | 10.99                       | 81.2                      | 29.3                | 15533                           | ND                        | ND                        | No           |
| FINC                | HTSVQTTSSGSGPFTDVR  | Yes               | 621.97                 | 935.5                 | 10.99                       | 81.2                      | 35.3                | ND                              | ND                        | ND                        | No           |
| FINC                | SSPVVIDASTAIDAPSNLR | No                |                        |                       |                             |                           |                     |                                 |                           |                           |              |
| FINC                | SYTITGLQPGTDYK      | Yes               | 772.39                 | 352.2                 | 13.93                       | 100.6                     | 36.5                | 106423                          | ND                        | ND                        | No           |
| FINC                | SYTITGLQPGTDYK      | Yes               | 772.39                 | 680.3                 | 13.93                       | 100.6                     | 36.5                | 120465                          | ND                        | ND                        | No           |
| FINC                | SYTITGLQPGTDYK      | Yes               | 772.39                 | 808.4                 | 13.93                       | 100.6                     | 33.5                | 21020                           | ND                        | ND                        | No           |
| FINC                | SYTITGLQPGTDYK      | Yes               | 772.39                 | 978.5                 | 13.93                       | 100.6                     | 36.5                | 38438                           | ND                        | ND                        | No           |
| FINC                | VPGTSTSATLTGLTR     | Yes               | 487.94                 | 446.3                 | 13.14                       | 63.9                      | 22.4                | 54973                           | ND                        | ND                        | No           |
| FINC                | VPGTSTSATLTGLTR     | Yes               | 487.94                 | 547.3                 | 13.14                       | 63.9                      | 22.4                | 43942                           | ND                        | ND                        | No           |



**Table S5.** MRM assay of individual proteins.

| Protein<br>(_HUMAN) | Peptide                      | MS/MS<br>spectrum | Precursor ion<br>(m/z) | Fragment ion<br>(m/z) | Retention time<br>(minutes) | Decustering<br>potential | Collision<br>energy | Area of<br>synthetic<br>peptide | Area in control<br>sample | Area in disease<br>sample | Interference |
|---------------------|------------------------------|-------------------|------------------------|-----------------------|-----------------------------|--------------------------|---------------------|---------------------------------|---------------------------|---------------------------|--------------|
| FINC                | VPGTSTSATLTGLTR              | Yes               | 487.94                 | 660.4                 | 13.14                       | 63.9                     | 25.4                | 8324                            | ND                        | ND                        | No           |
| FINC                | VPGTSTSATLTGLTR              | Yes               | 487.94                 | 701.3                 | 13.14                       | 63.9                     | 22.4                | 5016                            | ND                        | ND                        | No           |
| FINC                | VVTPLSPPTNLHLEANPDTGVLTVSWER | Yes               | 1014.87                | 300.2                 | 21.70                       | 131.9                    | 46.3                | ND                              | ND                        | ND                        | No           |
| FINC                | VVTPLSPPTNLHLEANPDTGVLTVSWER | Yes               | 1014.87                | 577.3                 | 21.70                       | 131.9                    | 46.3                | ND                              | ND                        | ND                        | No           |
| FINC                | VVTPLSPPTNLHLEANPDTGVLTVSWER | Yes               | 1014.87                | 777.4                 | 21.70                       | 131.9                    | 49.3                | ND                              | ND                        | ND                        | No           |
| FINC                | VVTPLSPPTNLHLEANPDTGVLTVSWER | Yes               | 1014.87                | 890.5                 | 21.70                       | 131.9                    | 46.3                | ND                              | ND                        | ND                        | No           |
| FKB11               | AEAGLETESPVR                 | Yes               | 629.82                 | 371.2                 | 10.11                       | 82.2                     | 30.2                | 35197                           | ND                        | ND                        | No           |
| FKB11               | AEAGLETESPVR                 | Yes               | 629.82                 | 688.4                 | 10.11                       | 82.2                     | 33.2                | 44723                           | ND                        | ND                        | No           |
| FKB11               | AEAGLETESPVR                 | Yes               | 629.82                 | 817.4                 | 10.11                       | 82.2                     | 33.2                | 45902                           | ND                        | ND                        | No           |
| FKB11               | AEAGLETESPVR                 | Yes               | 629.82                 | 987.5                 | 10.11                       | 82.2                     | 39.2                | 13030                           | ND                        | ND                        | No           |
| FKB11               | ANYWLK                       | Yes               | 397.71                 | 260.2                 | 13.24                       | 52.3                     | 29                  | 153600                          | ND                        | ND                        | No           |
| FKB11               | ANYWLK                       | Yes               | 397.71                 | 446.3                 | 13.24                       | 52.3                     | 20                  | 54095                           | ND                        | ND                        | No           |
| FKB11               | ANYWLK                       | Yes               | 397.71                 | 609.3                 | 13.24                       | 52.3                     | 20                  | 145690                          | ND                        | ND                        | No           |
| FKB11               | ANYWLK                       | Yes               | 397.71                 | 723.4                 | 13.24                       | 52.3                     | 20                  | 32858                           | ND                        | ND                        | No           |
| FKB11               | DPLVIELGQK                   | Yes               | 556.32                 | 326.2                 | 16.11                       | 72.8                     | 27                  | 960171                          | ND                        | ND                        | No           |
| FKB11               | DPLVIELGQK                   | Yes               | 556.32                 | 445.3                 | 16.11                       | 72.8                     | 36                  | 222987                          | ND                        | ND                        | No           |
| FKB11               | DPLVIELGQK                   | Yes               | 556.32                 | 687.4                 | 16.11                       | 72.8                     | 27                  | 591374                          | ND                        | ND                        | No           |
| FKB11               | DPLVIELGQK                   | Yes               | 556.32                 | 786.5                 | 16.11                       | 72.8                     | 27                  | 355708                          | ND                        | ND                        | No           |
| FKB11               | IIDTSLTR                     | Yes               | 459.77                 | 342.2                 | 10.42                       | 60.3                     | 22.7                | 14359                           | ND                        | ND                        | No           |
| FKB11               | IIDTSLTR                     | Yes               | 459.77                 | 577.3                 | 10.42                       | 60.3                     | 31.7                | 31213                           | ND                        | ND                        | No           |
| FKB11               | IIDTSLTR                     | Yes               | 459.77                 | 692.4                 | 10.42                       | 60.3                     | 22.7                | 93052                           | ND                        | ND                        | No           |
| FKB11               | IIDTSLTR                     | Yes               | 459.77                 | 805.4                 | 10.42                       | 60.3                     | 22.7                | 12380                           | ND                        | ND                        | No           |
| FOLH1               | DSWVFGGIDPQSGAAVVHEIVR       | Yes               | 780.4                  | 387.3                 | 22.74                       | 101.7                    | 46.4                | 4920                            | ND                        | ND                        | No           |

**Table S5.** MRM assay of individual proteins.

| Protein<br>(_HUMAN) | Peptide                | MS/MS<br>spectrum | Precursor ion<br>(m/z) | Fragment ion<br>(m/z) | Retention time<br>(minutes) | Declustering<br>potential | Collision<br>energy | Area of<br>synthetic<br>peptide | Area in control<br>sample | Area in disease<br>sample | Interference                           |
|---------------------|------------------------|-------------------|------------------------|-----------------------|-----------------------------|---------------------------|---------------------|---------------------------------|---------------------------|---------------------------|----------------------------------------|
| FOLH1               | DSWVFGGIDPQSGAAVVHEIVR | Yes               | 780.4                  | 389.1                 | 22.74                       | 101.7                     | 37.4                | 44712                           | ND                        | ND                        | No                                     |
| FOLH1               | DSWVFGGIDPQSGAAVVHEIVR | Yes               | 780.4                  | 488.2                 | 22.74                       | 101.7                     | 34.4                | 15888                           | ND                        | ND                        | No                                     |
| FOLH1               | DSWVFGGIDPQSGAAVVHEIVR | Yes               | 780.4                  | 752.4                 | 22.74                       | 101.7                     | 43.4                | 6717                            | ND                        | ND                        | No                                     |
| FOLH1               | GVILYSDPADYFAPGVK      | Yes               | 906.46                 | 270.2                 | 20.76                       | 117.9                     | 42.4                | 621589                          | ND                        | ND                        | No                                     |
| FOLH1               | GVILYSDPADYFAPGVK      | Yes               | 906.46                 | 383.3                 | 20.76                       | 117.9                     | 39.4                | 319322                          | ND                        | ND                        | No                                     |
| FOLH1               | GVILYSDPADYFAPGVK      | Yes               | 906.46                 | 400.3                 | 20.76                       | 117.9                     | 51.4                | 571945                          | ND                        | ND                        | No                                     |
| FOLH1               | GVILYSDPADYFAPGVK      | Yes               | 906.46                 | 471.3                 | 20.76                       | 117.9                     | 51.4                | 131760                          | ND                        | ND                        | No                                     |
| FOLH1               | LGSGNDFEVFFQR          | Yes               | 758.37                 | 450.2                 | 21.06                       | 98.8                      | 35.9                | 95476                           | 66837                     | 87446                     | Yes (Based on<br>Transition<br>Ratios) |
| FOLH1               | LGSGNDFEVFFQR          | Yes               | 758.37                 | 597.3                 | 21.06                       | 98.8                      | 35.9                | 180812                          | 45786                     | 53409                     | No                                     |
| FOLH1               | LGSGNDFEVFFQR          | Yes               | 758.37                 | 696.4                 | 21.06                       | 98.8                      | 44.9                | 99088                           | 42721                     | 51820                     | No                                     |
| FOLH1               | LGSGNDFEVFFQR          | Yes               | 758.37                 | 825.4                 | 21.06                       | 98.8                      | 38.9                | 137502                          | 51353                     | 50481                     | No                                     |
| FOLH1               | SYPDGWNLPGGGVQR        | Yes               | 534.93                 | 459.3                 | 15.52                       | 70                        | 30.8                | ND                              | ND                        | ND                        | No                                     |
| FOLH1               | SYPDGWNLPGGGVQR        | Yes               | 534.93                 | 573.3                 | 15.52                       | 70                        | 27.8                | 26690                           | ND                        | ND                        | No                                     |
| FOLH1               | SYPDGWNLPGGGVQR        | Yes               | 534.93                 | 670.4                 | 15.52                       | 70                        | 24.8                | 65126                           | ND                        | ND                        | No                                     |
| FOLH1               | SYPDGWNLPGGGVQR        | Yes               | 534.93                 | 783.4                 | 15.52                       | 70                        | 24.8                | ND                              | ND                        | ND                        | No                                     |
| FOLH1               | TYSVSFDSLFSAVK         | Yes               | 775.89                 | 352.2                 | 23.30                       | 101.1                     | 36.6                | 36780                           | ND                        | ND                        | No                                     |
| FOLH1               | TYSVSFDSLFSAVK         | Yes               | 775.89                 | 404.3                 | 23.30                       | 101.1                     | 42.6                | 16594                           | ND                        | ND                        | No                                     |
| FOLH1               | TYSVSFDSLFSAVK         | Yes               | 775.89                 | 751.4                 | 23.30                       | 101.1                     | 45.6                | 10770                           | ND                        | ND                        | No                                     |
| FOLH1               | TYSVSFDSLFSAVK         | Yes               | 775.89                 | 866.5                 | 23.30                       | 101.1                     | 33.6                | 17893                           | ND                        | ND                        | No                                     |
| FOLR1               | DVSYLYR                | Yes               | 458.23                 | 302.1                 | 11.97                       | 60.1                      | 19.7                | 20349                           | ND                        | ND                        | No                                     |
| FOLR1               | DVSYLYR                | Yes               | 458.23                 | 338.2                 | 11.97                       | 60.1                      | 25.7                | 22175                           | ND                        | ND                        | No                                     |
| FOLR1               | DVSYLYR                | Yes               | 458.23                 | 614.3                 | 11.97                       | 60.1                      | 25.7                | 18355                           | ND                        | ND                        | No                                     |

**Table S5.** MRM assay of individual proteins.

| Protein<br>(_HUMAN) | Peptide                     | MS/MS<br>spectrum | Precursor ion<br>(m/z) | Fragment ion<br>(m/z) | Retention time<br>(minutes) | Decustering<br>potential | Collision<br>energy | Area of<br>synthetic<br>peptide | Area in control<br>sample | Area in disease<br>sample | Interference |
|---------------------|-----------------------------|-------------------|------------------------|-----------------------|-----------------------------|--------------------------|---------------------|---------------------------------|---------------------------|---------------------------|--------------|
| FOLR1               | DVSYLYR                     | Yes               | 458.23                 | 701.4                 | 11.97                       | 60.1                     | 22.7                | 141112                          | ND                        | ND                        | No           |
| FOLR1               | EKPGPEDK                    | Yes               | 450.23                 | 262.1                 | 5.29                        | 59.1                     | 31.3                | 57632                           | ND                        | ND                        | No           |
| FOLR1               | EKPGPEDK                    | Yes               | 450.23                 | 488.2                 | 5.29                        | 59.1                     | 31.3                | 55564                           | ND                        | ND                        | No           |
| FOLR1               | EKPGPEDK                    | Yes               | 450.23                 | 545.3                 | 5.29                        | 59.1                     | 31.3                | 79863                           | ND                        | ND                        | No           |
| FOLR1               | EKPGPEDK                    | Yes               | 450.23                 | 642.3                 | 5.29                        | 59.1                     | 22.3                | 232514                          | ND                        | ND                        | No           |
| FOLR1               | GWNWTSGFNK                  | Yes               | 598.78                 | 552.3                 | 18.11                       | 78.2                     | 37.8                | 47714                           | ND                        | ND                        | No           |
| FOLR1               | GWNWTSGFNK                  | Yes               | 598.78                 | 653.3                 | 18.11                       | 78.2                     | 28.8                | 53968                           | ND                        | ND                        | No           |
| FOLR1               | GWNWTSGFNK                  | Yes               | 598.78                 | 839.4                 | 18.11                       | 78.2                     | 28.8                | 44300                           | ND                        | ND                        | No           |
| FOLR1               | GWNWTSGFNK                  | Yes               | 598.78                 | 953.4                 | 18.11                       | 78.2                     | 28.8                | 38690                           | ND                        | ND                        | No           |
| FOLR1               | VSNYSR                      | Yes               | 363.18                 | 262.2                 | 5.49                        | 47.9                     | 27.5                | 7736                            | ND                        | ND                        | No           |
| FOLR1               | VSNYSR                      | Yes               | 363.18                 | 425.2                 | 5.49                        | 47.9                     | 24.5                | 4258                            | ND                        | ND                        | No           |
| FOLR1               | VSNYSR                      | Yes               | 363.18                 | 539.3                 | 5.49                        | 47.9                     | 18.5                | 17561                           | ND                        | ND                        | No           |
| FOLR1               | VSNYSR                      | Yes               | 363.18                 | 626.3                 | 5.49                        | 47.9                     | 18.5                | 20804                           | ND                        | ND                        | No           |
| FOXA2               | AYEQVMHYPGYGSPMPGSLAMGPVTNK | Yes               | 961.45                 | 558.3                 | 17.74                       | 125                      | 46.6                | 24850                           | ND                        | ND                        | No           |
| FOXA2               | AYEQVMHYPGYGSPMPGSLAMGPVTNK | Yes               | 961.45                 | 615.3                 | 17.74                       | 125                      | 52.6                | 8781                            | ND                        | ND                        | No           |
| FOXA2               | AYEQVMHYPGYGSPMPGSLAMGPVTNK | Yes               | 961.45                 | 817.4                 | 17.74                       | 125                      | 46.6                | ND                              | ND                        | ND                        | No           |
| FOXA2               | AYEQVMHYPGYGSPMPGSLAMGPVTNK | Yes               | 961.45                 | 930.5                 | 17.74                       | 125                      | 46.6                | ND                              | ND                        | ND                        | No           |
| FOXA2               | EAAGAAGSGK                  | Yes               | 409.7                  | 348.2                 | 5.76                        | 53.9                     | 20.5                | 192883                          | ND                        | ND                        | No           |
| FOXA2               | EAAGAAGSGK                  | Yes               | 409.7                  | 490.3                 | 5.76                        | 53.9                     | 20.5                | 105898                          | ND                        | ND                        | No           |
| FOXA2               | EAAGAAGSGK                  | Yes               | 409.7                  | 547.3                 | 5.76                        | 53.9                     | 20.5                | 235811                          | ND                        | ND                        | No           |
| FOXA2               | EAAGAAGSGK                  | Yes               | 409.7                  | 618.3                 | 5.76                        | 53.9                     | 23.5                | 150181                          | ND                        | ND                        | No           |
| FOXA2               | MHSASSMLGAVK                | Yes               | 406.87                 | 374.2                 | 13.15                       | 53.5                     | 18.3                | 1840859                         | ND                        | ND                        | No           |
| FOXA2               | MHSASSMLGAVK                | Yes               | 406.87                 | 487.3                 | 13.15                       | 53.5                     | 18.3                | 1116955                         | ND                        | ND                        | No           |

**Table S5.** MRM assay of individual proteins.

| <b>Protein<br/>(_HUMAN)</b> | <b>Peptide</b>              | <b>MS/MS<br/>spectrum</b> | <b>Precursor ion<br/>(m/z)</b> | <b>Fragment ion<br/>(m/z)</b> | <b>Retention time<br/>(minutes)</b> | <b>Declustering<br/>potential</b> | <b>Collision<br/>energy</b> | <b>Area of<br/>synthetic<br/>peptide</b> | <b>Area in control<br/>sample</b> | <b>Area in disease<br/>sample</b> | <b>Interference</b> |
|-----------------------------|-----------------------------|---------------------------|--------------------------------|-------------------------------|-------------------------------------|-----------------------------------|-----------------------------|------------------------------------------|-----------------------------------|-----------------------------------|---------------------|
| FOXA2                       | MHSASSMLGAVK                | Yes                       | 406.87                         | 601.2                         | 13.15                               | 53.5                              | 15.3                        | 392109                                   | ND                                | ND                                | No                  |
| FOXA2                       | MHSASSMLGAVK                | Yes                       | 406.87                         | 732.3                         | 13.15                               | 53.5                              | 18.3                        | 480754                                   | ND                                | ND                                | No                  |
| FOXA2                       | MLTLSEIQWIMDLFPFYR          | No                        |                                |                               |                                     |                                   |                             |                                          |                                   |                                   |                     |
| FOXA2                       | SYTHAKPPYSYISLITMAIQSPNK    | No                        |                                |                               |                                     |                                   |                             |                                          |                                   |                                   |                     |
| FOXA2                       | TGLDASPLAADTSYYQGVYSRPIMNSS | Yes                       | 955.45                         | 387.2                         | 20.08                               | 124.3                             | 52.3                        | 12986                                    | ND                                | ND                                | No                  |
| FOXA2                       | TGLDASPLAADTSYYQGVYSRPIMNSS | Yes                       | 955.45                         | 545.3                         | 20.08                               | 124.3                             | 52.3                        | 9178                                     | ND                                | ND                                | No                  |
| FOXA2                       | TGLDASPLAADTSYYQGVYSRPIMNSS | Yes                       | 955.45                         | 648.3                         | 20.08                               | 124.3                             | 43.3                        | 21099                                    | ND                                | ND                                | No                  |
| FOXA2                       | TGLDASPLAADTSYYQGVYSRPIMNSS | Yes                       | 955.45                         | 826.4                         | 20.08                               | 124.3                             | 49.3                        | 6470                                     | ND                                | ND                                | No                  |
| FOXA2                       | WQNSIR                      | No                        |                                |                               |                                     |                                   |                             |                                          |                                   |                                   |                     |
| FP100                       | AEYLPPSVASIK                | Yes                       | 637.85                         | 364.2                         | 17.16                               | 83.3                              | 30.6                        | ND                                       | ND                                | ND                                | No                  |
| FP100                       | AEYLPPSVASIK                | Yes                       | 637.85                         | 477.2                         | 17.16                               | 83.3                              | 27.6                        | ND                                       | ND                                | ND                                | No                  |
| FP100                       | AEYLPPSVASIK                | Yes                       | 637.85                         | 701.4                         | 17.16                               | 83.3                              | 39.6                        | ND                                       | ND                                | ND                                | No                  |
| FP100                       | AEYLPPSVASIK                | Yes                       | 637.85                         | 798.5                         | 17.16                               | 83.3                              | 30.6                        | ND                                       | ND                                | ND                                | No                  |
| FP100                       | APSPLGPTR                   | Yes                       | 448.25                         | 256.1                         | 8.32                                | 58.8                              | 22.2                        | 25923                                    | ND                                | ND                                | No                  |
| FP100                       | APSPLGPTR                   | Yes                       | 448.25                         | 543.3                         | 8.32                                | 58.8                              | 31.2                        | 17147                                    | ND                                | ND                                | No                  |
| FP100                       | APSPLGPTR                   | Yes                       | 448.25                         | 640.4                         | 8.32                                | 58.8                              | 25.2                        | 35916                                    | ND                                | ND                                | No                  |
| FP100                       | APSPLGPTR                   | Yes                       | 448.25                         | 727.4                         | 8.32                                | 58.8                              | 22.2                        | 16442                                    | ND                                | ND                                | No                  |
| FP100                       | ELLSGIGNISER                | Yes                       | 644.35                         | 675.3                         | 16.18                               | 84.1                              | 30.9                        | 41926                                    | ND                                | ND                                | No                  |
| FP100                       | ELLSGIGNISER                | Yes                       | 644.35                         | 788.4                         | 16.18                               | 84.1                              | 30.9                        | 9248                                     | ND                                | ND                                | No                  |
| FP100                       | ELLSGIGNISER                | Yes                       | 644.35                         | 845.4                         | 16.18                               | 84.1                              | 30.9                        | 21635                                    | ND                                | ND                                | No                  |
| FP100                       | ELLSGIGNISER                | Yes                       | 644.35                         | 932.5                         | 16.18                               | 84.1                              | 30.9                        | 22228                                    | ND                                | ND                                | No                  |
| FP100                       | EPGSQPAGPASLR               | Yes                       | 633.83                         | 499.2                         | 8.74                                | 82.8                              | 30.4                        | 16923                                    | ND                                | ND                                | No                  |
| FP100                       | EPGSQPAGPASLR               | Yes                       | 633.83                         | 543.3                         | 8.74                                | 82.8                              | 39.4                        | 25039                                    | ND                                | ND                                | No                  |

**Table S5.** MRM assay of individual proteins.

| Protein<br>(_HUMAN) | Peptide       | MS/MS<br>spectrum | Precursor ion<br>(m/z) | Fragment ion<br>(m/z) | Retention time<br>(minutes) | Declustering<br>potential | Collision<br>energy | Area of<br>synthetic<br>peptide | Area in control<br>sample | Area in disease<br>sample | Interference |
|---------------------|---------------|-------------------|------------------------|-----------------------|-----------------------------|---------------------------|---------------------|---------------------------------|---------------------------|---------------------------|--------------|
| FP100               | EPGSQPAGPASLR | Yes               | 633.83                 | 600.3                 | 8.74                        | 82.8                      | 39.4                | 46345                           | ND                        | ND                        | No           |
| FP100               | EPGSQPAGPASLR | Yes               | 633.83                 | 768.4                 | 8.74                        | 82.8                      | 30.4                | 202001                          | ND                        | ND                        | No           |
| FP100               | SAPGDPNALVK   | Yes               | 534.79                 | 428.2                 | 9.29                        | 70                        | 23                  | 49117                           | ND                        | ND                        | No           |
| FP100               | SAPGDPNALVK   | Yes               | 534.79                 | 641.4                 | 9.29                        | 70                        | 32                  | 513839                          | ND                        | ND                        | No           |
| FP100               | SAPGDPNALVK   | Yes               | 534.79                 | 813.4                 | 9.29                        | 70                        | 29                  | 301921                          | ND                        | ND                        | No           |
| FP100               | SAPGDPNALVK   | Yes               | 534.79                 | 910.5                 | 9.29                        | 70                        | 26                  | 186353                          | ND                        | ND                        | No           |
| FRIH                | HTLGDSDNES    | No                |                        |                       |                             |                           |                     |                                 |                           |                           |              |
| FRIH                | NVNQSLLELHK   | Yes               | 432.24                 | 397.3                 | 12.80                       | 56.8                      | 28.6                | 110216                          | 188672                    | 198440                    | No           |
| FRIH                | NVNQSLLELHK   | Yes               | 432.24                 | 526.3                 | 12.80                       | 56.8                      | 22.6                | 59293                           | 179028                    | 170681                    | No           |
| FRIH                | NVNQSLLELHK   | Yes               | 432.24                 | 639.4                 | 12.80                       | 56.8                      | 22.6                | 42222                           | 92092                     | 125788                    | No           |
| FRIH                | NVNQSLLELHK   | Yes               | 432.24                 | 839.5                 | 12.80                       | 56.8                      | 19.6                | 23532                           | 74505                     | 73009                     | No           |
| FRIH                | QNYHQDSEAAINR | No                |                        |                       |                             |                           |                     |                                 |                           |                           |              |
| FRIH                | YFLHQSHEER    | Yes               | 449.21                 | 311.1                 | 7.82                        | 58.9                      | 23.5                | 12003                           | ND                        | ND                        | No           |
| FRIH                | YFLHQSHEER    | Yes               | 449.21                 | 570.3                 | 7.82                        | 58.9                      | 29.5                | 3782                            | ND                        | ND                        | No           |
| FRIH                | YFLHQSHEER    | Yes               | 449.21                 | 657.3                 | 7.82                        | 58.9                      | 29.5                | 7495                            | ND                        | ND                        | No           |
| FRIH                | YFLHQSHEER    | Yes               | 449.21                 | 785.4                 | 7.82                        | 58.9                      | 29.5                | 11764                           | ND                        | ND                        | No           |
| FRIL                | ALFQDIK       | Yes               | 417.74                 | 260.2                 | 16.18                       | 54.9                      | 29.9                | 3810242                         | 23807                     | 39385                     | No           |
| FRIL                | ALFQDIK       | Yes               | 417.74                 | 503.3                 | 16.18                       | 54.9                      | 20.9                | 1658809                         | 21084                     | 10678                     | No           |
| FRIL                | ALFQDIK       | Yes               | 417.74                 | 650.4                 | 16.18                       | 54.9                      | 20.9                | 13108685                        | 108507                    | 108354                    | No           |
| FRIL                | ALFQDIK       | Yes               | 417.74                 | 763.4                 | 16.18                       | 54.9                      | 20.9                | 594854                          | 5486                      | 8152                      | No           |
| FRIL                | DDVALEGVSHFFR | Yes               | 497.91                 | 469.3                 | 21.28                       | 65.2                      | 31.9                | 227599                          | ND                        | ND                        | No           |
| FRIL                | DDVALEGVSHFFR | Yes               | 497.91                 | 693.3                 | 21.28                       | 65.2                      | 28.9                | 386963                          | ND                        | ND                        | No           |
| FRIL                | DDVALEGVSHFFR | Yes               | 497.91                 | 849.4                 | 21.28                       | 65.2                      | 31.9                | 365420                          | ND                        | ND                        | No           |

**Table S5.** MRM assay of individual proteins.

| Protein<br>(_HUMAN) | Peptide         | MS/MS<br>spectrum | Precursor ion<br>(m/z) | Fragment ion<br>(m/z) | Retention time<br>(minutes) | Declustering<br>potential | Collision<br>energy | Area of<br>synthetic<br>peptide | Area in control<br>sample | Area in disease<br>sample | Interference |
|---------------------|-----------------|-------------------|------------------------|-----------------------|-----------------------------|---------------------------|---------------------|---------------------------------|---------------------------|---------------------------|--------------|
| FRIL                | DDVALEGVSHFFR   | Yes               | 497.91                 | 978.5                 | 21.28                       | 65.2                      | 28.9                | 190128                          | ND                        | ND                        | No           |
| FRIL                | KPAEDEWGK       | Yes               | 353.84                 | 297.2                 | 8.64                        | 46.6                      | 24.6                | 29602                           | ND                        | ND                        | No           |
| FRIL                | KPAEDEWGK       | Yes               | 353.84                 | 390.2                 | 8.64                        | 46.6                      | 18.6                | 108976                          | ND                        | ND                        | No           |
| FRIL                | KPAEDEWGK       | Yes               | 353.84                 | 541.3                 | 8.64                        | 46.6                      | 15.6                | 50904                           | ND                        | ND                        | No           |
| FRIL                | KPAEDEWGK       | Yes               | 353.84                 | 634.3                 | 8.64                        | 46.6                      | 12.6                | 15648                           | ND                        | ND                        | No           |
| FRIL                | LGGPEAGLGEYLFER | Yes               | 804.41                 | 451.2                 | 22.04                       | 104.8                     | 46.9                | 39822                           | 30769                     | 20834                     | No           |
| FRIL                | LGGPEAGLGEYLFER | Yes               | 804.41                 | 525.3                 | 22.04                       | 104.8                     | 37.9                | 66747                           | 53070                     | 46944                     | No           |
| FRIL                | LGGPEAGLGEYLFER | Yes               | 804.41                 | 564.3                 | 22.04                       | 104.8                     | 46.9                | 36082                           | 37791                     | 21762                     | No           |
| FRIL                | LGGPEAGLGEYLFER | Yes               | 804.41                 | 913.4                 | 22.04                       | 104.8                     | 46.9                | 88924                           | 73407                     | 54708                     | No           |
| FRIL                | LNQALLDLHALGSAR | Yes               | 531.3                  | 356.2                 | 19.29                       | 69.5                      | 33.6                | 194342                          | ND                        | ND                        | No           |
| FRIL                | LNQALLDLHALGSAR | Yes               | 531.3                  | 427.2                 | 19.29                       | 69.5                      | 24.6                | 63877                           | ND                        | ND                        | No           |
| FRIL                | LNQALLDLHALGSAR | Yes               | 531.3                  | 574.3                 | 19.29                       | 69.5                      | 27.6                | 157532                          | ND                        | ND                        | No           |
| FRIL                | LNQALLDLHALGSAR | Yes               | 531.3                  | 711.4                 | 19.29                       | 69.5                      | 33.6                | 127649                          | ND                        | ND                        | No           |
| FRIL                | MGDHLTNLHR      | Yes               | 398.53                 | 312.2                 | 9.46                        | 52.4                      | 26.9                | 220056                          | 11477                     | 7008                      | No           |
| FRIL                | MGDHLTNLHR      | Yes               | 398.53                 | 539.3                 | 9.46                        | 52.4                      | 26.9                | 118206                          | 5587                      | 4786                      | No           |
| FRIL                | MGDHLTNLHR      | Yes               | 398.53                 | 640.4                 | 9.46                        | 52.4                      | 23.9                | 266343                          | 12654                     | 10610                     | No           |
| FRIL                | MGDHLTNLHR      | Yes               | 398.53                 | 753.4                 | 9.46                        | 52.4                      | 26.9                | 102197                          | 3213                      | 1675                      | No           |
| G3P                 | GALQNIIPASTGAAK | Yes               | 706.399                | 1042.6                | 13.97                       | 100                       | 36.6                | ND                              | 11890                     | 13713                     | No           |
| G3P                 | GALQNIIPASTGAAK | Yes               | 706.399                | 597.336               | 13.97                       | 100                       | 30.6                | ND                              | 17514                     | 20777                     | No           |
| G3P                 | GALQNIIPASTGAAK | Yes               | 706.399                | 815.463               | 13.97                       | 100                       | 30.6                | ND                              | 85112                     | 81049                     | No           |
| G3P                 | GALQNIIPASTGAAK | Yes               | 706.399                | 928.5                 | 13.97                       | 100                       | 36.6                | ND                              | 11299                     | 18298                     | No           |
| G3P                 | LISWYDNEFGYSNR  | Yes               | 882.405                | 1101.5                | 17.92                       | 100                       | 44.3                | ND                              | 3801                      | 4720                      | No           |
| G3P                 | LISWYDNEFGYSNR  | Yes               | 882.405                | 596.279               | 17.92                       | 100                       | 38.3                | ND                              | 10800                     | 8992                      | No           |

**Table S5.** MRM assay of individual proteins.

| Protein<br>(_HUMAN) | Peptide                  | MS/MS<br>spectrum | Precursor ion<br>(m/z) | Fragment ion<br>(m/z) | Retention time<br>(minutes) | Decustering<br>potential | Collision<br>energy | Area of<br>synthetic<br>peptide | Area in control<br>sample | Area in disease<br>sample | Interference                       |
|---------------------|--------------------------|-------------------|------------------------|-----------------------|-----------------------------|--------------------------|---------------------|---------------------------------|---------------------------|---------------------------|------------------------------------|
| G3P                 | LISWYDNEFGYSNR           | Yes               | 882.405                | 743.348               | 17.92                       | 100                      | 50.3                | ND                              | 10181                     | 10233                     | No                                 |
| G3P                 | LVINGNPITIFQER           | Yes               | 807.5                  | 1003.6                | 23.00                       | 100                      | 41                  | ND                              | ND                        | ND                        | No                                 |
| G3P                 | LVINGNPITIFQER           | Yes               | 807.5                  | 579.3                 | 23.00                       | 100                      | 41                  | ND                              | ND                        | ND                        | No                                 |
| G3P                 | LVINGNPITIFQER           | Yes               | 807.5                  | 692.4                 | 23.00                       | 100                      | 41                  | ND                              | ND                        | ND                        | No                                 |
| G3P                 | LVINGNPITIFQER           | Yes               | 807.5                  | 793.4                 | 23.00                       | 100                      | 41                  | ND                              | ND                        | ND                        | No                                 |
| G3P                 | VVDLMAHMASK              | Yes               | 401.2                  | 315.2                 | 14.50                       | 100                      | 21                  | ND                              | ND                        | ND                        | No                                 |
| G3P                 | VVDLMAHMASK              | Yes               | 401.2                  | 388.2                 | 14.50                       | 100                      | 21                  | ND                              | ND                        | ND                        | No                                 |
| G3P                 | VVDLMAHMASK              | Yes               | 401.2                  | 444.7                 | 14.50                       | 100                      | 21                  | ND                              | ND                        | ND                        | No                                 |
| G3P                 | VVDLMAHMASK              | Yes               | 401.2                  | 775.4                 | 14.50                       | 100                      | 21                  | ND                              | ND                        | ND                        | No                                 |
| G3P                 | VVDLMAHMASK              | Yes               | 601.3                  | 1003.5                | 14.50                       | 100                      | 32                  | ND                              | ND                        | ND                        | No                                 |
| G3P                 | VVDLMAHMASK              | Yes               | 601.3                  | 314.2                 | 14.50                       | 100                      | 32                  | ND                              | ND                        | ND                        | No                                 |
| G3P                 | VVDLMAHMASK              | Yes               | 601.3                  | 644.3                 | 14.50                       | 100                      | 32                  | ND                              | ND                        | ND                        | No                                 |
| G3P                 | VVDLMAHMASK              | Yes               | 601.3                  | 775.4                 | 14.50                       | 100                      | 32                  | ND                              | ND                        | ND                        | No                                 |
| G6PD                | DGLLPENTFIVGYAR          | Yes               | 832.94                 | 286.1                 | 20.81                       | 108.4                    | 36.1                | 428263                          | ND                        | ND                        | No                                 |
| G6PD                | DGLLPENTFIVGYAR          | Yes               | 832.94                 | 399.2                 | 20.81                       | 108.4                    | 36.1                | 112758                          | ND                        | ND                        | No                                 |
| G6PD                | DGLLPENTFIVGYAR          | Yes               | 832.94                 | 466.2                 | 20.81                       | 108.4                    | 48.1                | 43955                           | ND                        | ND                        | No                                 |
| G6PD                | DGLLPENTFIVGYAR          | Yes               | 832.94                 | 565.3                 | 20.81                       | 108.4                    | 48.1                | 48322                           | ND                        | ND                        | No                                 |
| G6PD                | GGYFDEFGIIR              | Yes               | 637.31                 | 605.4                 | 20.57                       | 83.2                     | 36.5                | 69714                           | 10686                     | 12201                     | No                                 |
| G6PD                | GGYFDEFGIIR              | Yes               | 637.31                 | 734.4                 | 20.57                       | 83.2                     | 39.5                | ND                              | 16302                     | 9970                      | Yes (Based on<br>Manual<br>Review) |
| G6PD                | GGYFDEFGIIR              | Yes               | 637.31                 | 849.4                 | 20.57                       | 83.2                     | 30.5                | 102889                          | 17417                     | 26108                     | No                                 |
| G6PD                | GGYFDEFGIIR              | Yes               | 637.31                 | 996.5                 | 20.57                       | 83.2                     | 39.5                | 30773                           | 1913                      | ND                        | No                                 |
| G6PD                | IFTPLLHQIELEKPKPIPYIYGSR | No                |                        |                       |                             |                          |                     |                                 |                           |                           |                                    |

**Table S5.** MRM assay of individual proteins.

| Protein<br>(_HUMAN) | Peptide                       | MS/MS<br>spectrum | Precursor ion<br>(m/z) | Fragment ion<br>(m/z) | Retention time<br>(minutes) | Declustering<br>potential | Collision<br>energy | Area of<br>synthetic<br>peptide | Area in control<br>sample | Area in disease<br>sample | Interference |
|---------------------|-------------------------------|-------------------|------------------------|-----------------------|-----------------------------|---------------------------|---------------------|---------------------------------|---------------------------|---------------------------|--------------|
| G6PD                | LPDAYER                       | Yes               | 432.22                 | 467.2                 | 8.41                        | 56.8                      | 30.5                | 12163                           | ND                        | ND                        | No           |
| G6PD                | LPDAYER                       | Yes               | 432.22                 | 538.3                 | 8.41                        | 56.8                      | 30.5                | 81157                           | ND                        | ND                        | No           |
| G6PD                | LPDAYER                       | Yes               | 432.22                 | 653.3                 | 8.41                        | 56.8                      | 24.5                | 74697                           | ND                        | ND                        | No           |
| G6PD                | LPDAYER                       | Yes               | 432.22                 | 750.3                 | 8.41                        | 56.8                      | 21.5                | 33761                           | ND                        | ND                        | No           |
| G6PD                | NSYVAGQYDDAASYQR              | Yes               | 904.4                  | 365.1                 | 10.77                       | 117.7                     | 42.3                | 74299                           | ND                        | ND                        | No           |
| G6PD                | NSYVAGQYDDAASYQR              | Yes               | 904.4                  | 464.2                 | 10.77                       | 117.7                     | 42.3                | 15219                           | ND                        | ND                        | No           |
| G6PD                | NSYVAGQYDDAASYQR              | Yes               | 904.4                  | 553.3                 | 10.77                       | 117.7                     | 39.3                | 11328                           | ND                        | ND                        | No           |
| G6PD                | NSYVAGQYDDAASYQR              | Yes               | 904.4                  | 695.3                 | 10.77                       | 117.7                     | 51.3                | 11108                           | ND                        | ND                        | No           |
| G6PI                | AVLHVALR                      | Yes               | 293.52                 | 359.2                 | 11.56                       | 38.9                      | 18.5                | 36350                           | ND                        | ND                        | No           |
| G6PI                | AVLHVALR                      | Yes               | 293.52                 | 421.3                 | 11.56                       | 38.9                      | 18.5                | 1669                            | ND                        | ND                        | No           |
| G6PI                | AVLHVALR                      | Yes               | 293.52                 | 458.3                 | 11.56                       | 38.9                      | 18.5                | 2941                            | ND                        | ND                        | No           |
| G6PI                | AVLHVALR                      | Yes               | 293.52                 | 595.4                 | 11.56                       | 38.9                      | 15.5                | 7750                            | ND                        | ND                        | No           |
| G6PI                | FNHFSLTNTNHGHILVDYSK          | No                |                        |                       |                             |                           |                     |                                 |                           |                           |              |
| G6PI                | TLAQLNPESSLFIIASK             | Yes               | 611.34                 | 418.3                 | 22.58                       | 79.9                      | 34.7                | 5901                            | ND                        | ND                        | No           |
| G6PI                | TLAQLNPESSLFIIASK             | Yes               | 611.34                 | 641.4                 | 22.58                       | 79.9                      | 25.7                | 5970                            | ND                        | ND                        | No           |
| G6PI                | TLAQLNPESSLFIIASK             | Yes               | 611.34                 | 678.4                 | 22.58                       | 79.9                      | 25.7                | 9215                            | ND                        | ND                        | No           |
| G6PI                | TLAQLNPESSLFIIASK             | Yes               | 611.34                 | 965.6                 | 22.58                       | 79.9                      | 25.7                | 3963                            | ND                        | ND                        | No           |
| G6PI                | VDHQTGPIVWGEPTNGQHAFYQLIHQGTK | No                |                        |                       |                             |                           |                     |                                 |                           |                           |              |
| G6PI                | VFEGNRPTNSIVFTK               | No                |                        |                       |                             |                           |                     |                                 |                           |                           |              |
| GA2L1               | AAPPAPNAPAAGEDTTETAPAPGTPAR   | Yes               | 833.74                 | 408.2                 | 9.38                        | 108.6                     | 40.1                | 9438                            | ND                        | ND                        | No           |
| GA2L1               | AAPPAPNAPAAGEDTTETAPAPGTPAR   | Yes               | 833.74                 | 598.3                 | 9.38                        | 108.6                     | 43.1                | 8577                            | ND                        | ND                        | No           |
| GA2L1               | AAPPAPNAPAAGEDTTETAPAPGTPAR   | Yes               | 833.74                 | 690.4                 | 9.38                        | 108.6                     | 37.1                | 5333                            | ND                        | ND                        | No           |
| GA2L1               | AAPPAPNAPAAGEDTTETAPAPGTPAR   | Yes               | 833.74                 | 766.4                 | 9.38                        | 108.6                     | 40.1                | 33081                           | ND                        | ND                        | No           |



**Table S5.** MRM assay of individual proteins.

| Protein<br>(_HUMAN) | Peptide              | MS/MS<br>spectrum | Precursor ion<br>(m/z) | Fragment ion<br>(m/z) | Retention time<br>(minutes) | Declustering<br>potential | Collision<br>energy | Area of<br>synthetic<br>peptide | Area in control<br>sample | Area in disease<br>sample | Interference |
|---------------------|----------------------|-------------------|------------------------|-----------------------|-----------------------------|---------------------------|---------------------|---------------------------------|---------------------------|---------------------------|--------------|
| GA2L1               | ALEAVASVTPTGPVDPAR   | Yes               | 616.67                 | 343.2                 | 15.33                       | 80.6                      | 38                  | 80156                           | 150208                    | 161856                    | No           |
| GA2L1               | ALEAVASVTPTGPVDPAR   | Yes               | 616.67                 | 484.3                 | 15.33                       | 80.6                      | 29                  | 7613                            | ND                        | ND                        | No           |
| GA2L1               | ALEAVASVTPTGPVDPAR   | Yes               | 616.67                 | 751.4                 | 15.33                       | 80.6                      | 29                  | 5008                            | ND                        | ND                        | No           |
| GA2L1               | ALEAVASVTPTGPVDPAR   | Yes               | 616.67                 | 808.4                 | 15.33                       | 80.6                      | 26                  | ND                              | 4252                      | ND                        | No           |
| GA2L1               | LVQFEQEIER           | Yes               | 645.84                 | 341.2                 | 14.37                       | 84.3                      | 27.9                | 15577                           | ND                        | ND                        | No           |
| GA2L1               | LVQFEQEIER           | Yes               | 645.84                 | 674.3                 | 14.37                       | 84.3                      | 39.9                | 9018                            | ND                        | ND                        | No           |
| GA2L1               | LVQFEQEIER           | Yes               | 645.84                 | 803.4                 | 14.37                       | 84.3                      | 39.9                | 7909                            | ND                        | ND                        | No           |
| GA2L1               | LVQFEQEIER           | Yes               | 645.84                 | 950.5                 | 14.37                       | 84.3                      | 30.9                | 9723                            | ND                        | ND                        | No           |
| GA2L1               | VGDSLLIFVR           | Yes               | 603.35                 | 421.3                 | 21.09                       | 78.8                      | 26                  | 28472                           | ND                        | ND                        | No           |
| GA2L1               | VGDSLLIFVR           | Yes               | 603.35                 | 534.3                 | 21.09                       | 78.8                      | 26                  | 19137                           | ND                        | ND                        | No           |
| GA2L1               | VGDSLLIFVR           | Yes               | 603.35                 | 647.4                 | 21.09                       | 78.8                      | 29                  | 21420                           | ND                        | ND                        | No           |
| GA2L1               | VGDSLLIFVR           | Yes               | 603.35                 | 847.5                 | 21.09                       | 78.8                      | 26                  | 10368                           | ND                        | ND                        | No           |
| GA2L1               | VSSPSELGTTASIFR      | Yes               | 873.46                 | 322.2                 | 17.73                       | 113.7                     | 40.9                | 20263                           | ND                        | ND                        | No           |
| GA2L1               | VSSPSELGTTASIFR      | Yes               | 873.46                 | 458.2                 | 17.73                       | 113.7                     | 37.9                | 20641                           | ND                        | ND                        | No           |
| GA2L1               | VSSPSELGTTASIFR      | Yes               | 873.46                 | 690.4                 | 17.73                       | 113.7                     | 49.9                | 46546                           | ND                        | ND                        | No           |
| GA2L1               | VSSPSELGTTASIFR      | Yes               | 873.46                 | 949.5                 | 17.73                       | 113.7                     | 46.9                | 54866                           | ND                        | ND                        | No           |
| GALT2               | EIILVDDYSNDPEDGALLGK | Yes               | 1088.54                | 356.2                 | 19.01                       | 141.4                     | 56.4                | 37389                           | ND                        | ND                        | No           |
| GALT2               | EIILVDDYSNDPEDGALLGK | Yes               | 1088.54                | 469.3                 | 19.01                       | 141.4                     | 47.4                | 15038                           | ND                        | ND                        | No           |
| GALT2               | EIILVDDYSNDPEDGALLGK | Yes               | 1088.54                | 558.4                 | 19.01                       | 141.4                     | 59.4                | 12550                           | ND                        | ND                        | No           |
| GALT2               | EIILVDDYSNDPEDGALLGK | Yes               | 1088.54                | 899.5                 | 19.01                       | 141.4                     | 56.4                | 19712                           | ND                        | ND                        | No           |
| GALT2               | GGFDWNLVFK           | Yes               | 591.8                  | 294.2                 | 23.12                       | 77.3                      | 28.5                | 99298                           | ND                        | ND                        | No           |
| GALT2               | GGFDWNLVFK           | Yes               | 591.8                  | 620.4                 | 23.12                       | 77.3                      | 25.5                | 36850                           | ND                        | ND                        | No           |
| GALT2               | GGFDWNLVFK           | Yes               | 591.8                  | 806.5                 | 23.12                       | 77.3                      | 28.5                | 69687                           | ND                        | ND                        | No           |

**Table S5.** MRM assay of individual proteins.

| Protein<br>(_HUMAN) | Peptide           | MS/MS<br>spectrum | Precursor ion<br>(m/z) | Fragment ion<br>(m/z) | Retention time<br>(minutes) | Decustering<br>potential | Collision<br>energy | Area of<br>synthetic<br>peptide | Area in control<br>sample | Area in disease<br>sample | Interference |
|---------------------|-------------------|-------------------|------------------------|-----------------------|-----------------------------|--------------------------|---------------------|---------------------------------|---------------------------|---------------------------|--------------|
| GALT2               | GGFDWNLVFK        | Yes               | 591.8                  | 921.5                 | 23.12                       | 77.3                     | 28.5                | 54662                           | ND                        | ND                        | No           |
| GALT2               | NFYAAVPSAR        | Yes               | 629.81                 | 425.2                 | 13.67                       | 82.2                     | 30.2                | 159543                          | ND                        | ND                        | No           |
| GALT2               | NFYAAVPSAR        | Yes               | 629.81                 | 671.4                 | 13.67                       | 82.2                     | 30.2                | 109544                          | ND                        | ND                        | No           |
| GALT2               | NFYAAVPSAR        | Yes               | 629.81                 | 834.4                 | 13.67                       | 82.2                     | 39.2                | 75865                           | ND                        | ND                        | No           |
| GALT2               | NFYAAVPSAR        | Yes               | 629.81                 | 997.5                 | 13.67                       | 82.2                     | 30.2                | 41053                           | ND                        | ND                        | No           |
| GALT2               | VDLPATSVVITFHNEAR | Yes               | 623.67                 | 489.2                 | 18.09                       | 81.5                     | 38.4                | 17673                           | ND                        | ND                        | No           |
| GALT2               | VDLPATSVVITFHNEAR | Yes               | 623.67                 | 773.4                 | 18.09                       | 81.5                     | 35.4                | 24800                           | ND                        | ND                        | No           |
| GALT2               | VDLPATSVVITFHNEAR | Yes               | 623.67                 | 874.4                 | 18.09                       | 81.5                     | 35.4                | 34995                           | ND                        | ND                        | No           |
| GALT2               | VDLPATSVVITFHNEAR | Yes               | 623.67                 | 987.5                 | 18.09                       | 81.5                     | 38.4                | 27583                           | ND                        | ND                        | No           |
| GALT2               | WYLENVPELR        | Yes               | 741.38                 | 350.2                 | 20.56                       | 96.6                     | 32.1                | 19591                           | ND                        | ND                        | No           |
| GALT2               | WYLENVPELR        | Yes               | 741.38                 | 514.3                 | 20.56                       | 96.6                     | 32.1                | 16651                           | ND                        | ND                        | No           |
| GALT2               | WYLENVPELR        | Yes               | 741.38                 | 677.4                 | 20.56                       | 96.6                     | 35.1                | 19105                           | ND                        | ND                        | No           |
| GALT2               | WYLENVPELR        | Yes               | 741.38                 | 890.5                 | 20.56                       | 96.6                     | 38.1                | 9228                            | ND                        | ND                        | No           |
| GAS6                | DGEATLEVDGTR      | Yes               | 631.8                  | 676.3                 | 9.97                        | 82.5                     | 30.3                | 85491                           | ND                        | ND                        | No           |
| GAS6                | DGEATLEVDGTR      | Yes               | 631.8                  | 789.4                 | 9.97                        | 82.5                     | 27.3                | 71226                           | ND                        | ND                        | No           |
| GAS6                | DGEATLEVDGTR      | Yes               | 631.8                  | 890.5                 | 9.97                        | 82.5                     | 30.3                | 50653                           | ND                        | ND                        | No           |
| GAS6                | DGEATLEVDGTR      | Yes               | 631.8                  | 961.5                 | 9.97                        | 82.5                     | 30.3                | 29416                           | ND                        | ND                        | No           |
| GAS6                | EVFENDPETDYFYPR   | Yes               | 960.92                 | 272.2                 | 17.39                       | 125                      | 41.8                | 77744                           | ND                        | ND                        | No           |
| GAS6                | EVFENDPETDYFYPR   | Yes               | 960.92                 | 435.2                 | 17.39                       | 125                      | 41.8                | 27734                           | ND                        | ND                        | No           |
| GAS6                | EVFENDPETDYFYPR   | Yes               | 960.92                 | 582.3                 | 17.39                       | 125                      | 47.8                | 8184                            | ND                        | ND                        | No           |
| GAS6                | EVFENDPETDYFYPR   | Yes               | 960.92                 | 734.3                 | 17.39                       | 125                      | 41.8                | 10789                           | ND                        | ND                        | No           |
| GAS6                | GQSEVSAAQLQER     | Yes               | 701.85                 | 432.2                 | 9.28                        | 91.5                     | 39.4                | 2813                            | ND                        | ND                        | No           |
| GAS6                | GQSEVSAAQLQER     | Yes               | 701.85                 | 744.4                 | 9.28                        | 91.5                     | 33.4                | 4991                            | ND                        | ND                        | No           |

**Table S5.** MRM assay of individual proteins.

| Protein<br>(_HUMAN) | Peptide           | MS/MS<br>spectrum | Precursor ion<br>(m/z) | Fragment ion<br>(m/z) | Retention time<br>(minutes) | Declustering<br>potential | Collision<br>energy | Area of<br>synthetic<br>peptide | Area in control<br>sample | Area in disease<br>sample | Interference |
|---------------------|-------------------|-------------------|------------------------|-----------------------|-----------------------------|---------------------------|---------------------|---------------------------------|---------------------------|---------------------------|--------------|
| GAS6                | GQSEVSAAQLQER     | Yes               | 701.85                 | 815.4                 | 9.28                        | 91.5                      | 39.4                | 4077                            | ND                        | ND                        | No           |
| GAS6                | GQSEVSAAQLQER     | Yes               | 701.85                 | 902.5                 | 9.28                        | 91.5                      | 33.4                | 7031                            | ND                        | ND                        | No           |
| GAS6                | IAVAGDLFQPER      | Yes               | 658.35                 | 401.2                 | 16.82                       | 85.9                      | 31.5                | 44520                           | ND                        | ND                        | No           |
| GAS6                | IAVAGDLFQPER      | Yes               | 658.35                 | 529.3                 | 16.82                       | 85.9                      | 31.5                | 18485                           | ND                        | ND                        | No           |
| GAS6                | IAVAGDLFQPER      | Yes               | 658.35                 | 789.4                 | 16.82                       | 85.9                      | 37.5                | 11136                           | ND                        | ND                        | No           |
| GAS6                | IAVAGDLFQPER      | Yes               | 658.35                 | 961.5                 | 16.82                       | 85.9                      | 31.5                | 14751                           | ND                        | ND                        | No           |
| GAS6                | SWNWLNGEDTTIQTQVK | Yes               | 1010.98                | 274.1                 | 20.29                       | 131.4                     | 53                  | 4193                            | ND                        | ND                        | No           |
| GAS6                | SWNWLNGEDTTIQTQVK | Yes               | 1010.98                | 574.2                 | 20.29                       | 131.4                     | 47                  | 2379                            | ND                        | ND                        | No           |
| GAS6                | SWNWLNGEDTTIQTQVK | Yes               | 1010.98                | 604.3                 | 20.29                       | 131.4                     | 47                  | 2341                            | ND                        | ND                        | No           |
| GAS6                | SWNWLNGEDTTIQTQVK | Yes               | 1010.98                | 919.5                 | 20.29                       | 131.4                     | 56                  | 794                             | ND                        | ND                        | No           |
| GDIR2               | APEPHVEEDDDDELDSK | Yes               | 647.3                  | 560.2                 | 12.00                       | 100                       | 33.5                | ND                              | ND                        | ND                        | No           |
| GDIR2               | APEPHVEEDDDDELDSK | Yes               | 647.3                  | 631.3                 | 12.00                       | 100                       | 33.5                | ND                              | ND                        | ND                        | No           |
| GDIR2               | APEPHVEEDDDDELDSK | Yes               | 647.3                  | 706.3                 | 12.00                       | 100                       | 33.5                | ND                              | ND                        | ND                        | No           |
| GDIR2               | APEPHVEEDDDDELDSK | Yes               | 647.3                  | 821.4                 | 12.00                       | 100                       | 33.5                | ND                              | ND                        | ND                        | No           |
| GDIR2               | APEPHVEEDDDDELDSK | Yes               | 970.4                  | 591.3                 | 12.00                       | 100                       | 48.2                | ND                              | ND                        | ND                        | No           |
| GDIR2               | APEPHVEEDDDDELDSK | Yes               | 970.4                  | 706.3                 | 12.00                       | 100                       | 48.2                | ND                              | ND                        | ND                        | No           |
| GDIR2               | APEPHVEEDDDDELDSK | Yes               | 970.4                  | 821.4                 | 12.00                       | 100                       | 48.2                | ND                              | ND                        | ND                        | No           |
| GDIR2               | APEPHVEEDDDDELDSK | Yes               | 970.4                  | 936.4                 | 12.00                       | 100                       | 48.2                | ND                              | ND                        | ND                        | No           |
| GDIR2               | DIVSGLK           | Yes               | 366.219                | 229.119               | 10.44                       | 100                       | 15.6                | ND                              | 53721                     | 58451                     | No           |
| GDIR2               | DIVSGLK           | Yes               | 366.219                | 317.2                 | 10.44                       | 100                       | 21.6                | ND                              | ND                        | 2271                      | No           |
| GDIR2               | DIVSGLK           | Yes               | 366.219                | 404.3                 | 10.44                       | 100                       | 21.6                | ND                              | ND                        | ND                        | No           |
| GDIR2               | DIVSGLK           | Yes               | 366.219                | 503.319               | 10.44                       | 100                       | 18.6                | ND                              | 121539                    | 108244                    | No           |
| GDIR2               | LNYKPPPQK         | Yes               | 362.21                 | 228.1                 | 6.82                        | 100                       | 19                  | ND                              | ND                        | ND                        | No           |

**Table S5.** MRM assay of individual proteins.

| Protein<br>(_HUMAN) | Peptide                | MS/MS<br>spectrum | Precursor ion<br>(m/z) | Fragment ion<br>(m/z) | Retention time<br>(minutes) | Decustering<br>potential | Collision<br>energy | Area of<br>synthetic<br>peptide | Area in control<br>sample | Area in disease<br>sample | Interference                           |
|---------------------|------------------------|-------------------|------------------------|-----------------------|-----------------------------|--------------------------|---------------------|---------------------------------|---------------------------|---------------------------|----------------------------------------|
| GDIR2               | LNYKPPPQK              | Yes               | 362.21                 | 283.669               | 6.82                        | 100                      | 19                  | ND                              | 18358                     | 5165                      | No                                     |
| GDIR2               | LNYKPPPQK              | Yes               | 362.21                 | 372.2                 | 6.82                        | 100                      | 19                  | ND                              | ND                        | ND                        | No                                     |
| GDIR2               | LNYKPPPQK              | Yes               | 362.21                 | 566.33                | 6.82                        | 100                      | 22                  | ND                              | 42222                     | 12654                     | No                                     |
| GDIR2               | LNYKPPPQK              | Yes               | 542.8                  | 228.1                 | 6.82                        | 100                      | 29.4                | ND                              | ND                        | ND                        | No                                     |
| GDIR2               | LNYKPPPQK              | Yes               | 542.8                  | 372.2                 | 6.82                        | 100                      | 29.4                | ND                              | ND                        | ND                        | No                                     |
| GDIR2               | LNYKPPPQK              | Yes               | 542.8                  | 391.2                 | 6.82                        | 100                      | 29.4                | ND                              | ND                        | ND                        | No                                     |
| GDIR2               | LNYKPPPQK              | Yes               | 542.8                  | 566.3                 | 6.82                        | 100                      | 29.4                | ND                              | ND                        | ND                        | No                                     |
| GDIR2               | QDHLSWEWNLSIK          | Yes               | 552.6                  | 244.1                 | 21.30                       | 100                      | 28.7                | ND                              | ND                        | ND                        | No                                     |
| GDIR2               | QDHLSWEWNLSIK          | Yes               | 552.6                  | 381.2                 | 21.30                       | 100                      | 28.7                | ND                              | ND                        | ND                        | No                                     |
| GDIR2               | QDHLSWEWNLSIK          | Yes               | 552.6                  | 574.4                 | 21.30                       | 100                      | 28.7                | ND                              | ND                        | ND                        | No                                     |
| GDIR2               | QDHLSWEWNLSIK          | Yes               | 552.6                  | 760.4                 | 21.30                       | 100                      | 28.7                | ND                              | ND                        | ND                        | No                                     |
| GDIR2               | SFFTDDDK               | Yes               | 487.7                  | 235.1                 | 13.90                       | 100                      | 27                  | ND                              | ND                        | ND                        | No                                     |
| GDIR2               | SFFTDDDK               | Yes               | 487.7                  | 262.1                 | 13.90                       | 100                      | 27                  | ND                              | ND                        | ND                        | No                                     |
| GDIR2               | SFFTDDDK               | Yes               | 487.7                  | 593.2                 | 13.90                       | 100                      | 27                  | ND                              | ND                        | ND                        | No                                     |
| GDIR2               | SFFTDDDK               | Yes               | 487.7                  | 740.3                 | 13.90                       | 100                      | 27                  | ND                              | ND                        | ND                        | No                                     |
| GDIR2               | TLLGDGPVVTDPK          | Yes               | 656.4                  | 1097.6                | 15.90                       | 100                      | 34.4                | ND                              | ND                        | ND                        | No                                     |
| GDIR2               | TLLGDGPVVTDPK          | Yes               | 656.4                  | 244.2                 | 15.90                       | 100                      | 34.4                | ND                              | ND                        | ND                        | No                                     |
| GDIR2               | TLLGDGPVVTDPK          | Yes               | 656.4                  | 812.5                 | 15.90                       | 100                      | 34.4                | ND                              | ND                        | ND                        | No                                     |
| GDIR2               | TLLGDGPVVTDPK          | Yes               | 656.4                  | 984.5                 | 15.90                       | 100                      | 34.4                | ND                              | ND                        | ND                        | No                                     |
| GELS                | AQPVQVAEGSEPDGFWEALGGK | Yes               | 758.03                 | 374.2                 | 21.06                       | 98.8                     | 42.2                | 15183                           | 736000                    | 786148                    | No                                     |
| GELS                | AQPVQVAEGSEPDGFWEALGGK | Yes               | 758.03                 | 396.2                 | 21.06                       | 98.8                     | 42.2                | 8515                            | 551349                    | 580613                    | No                                     |
| GELS                | AQPVQVAEGSEPDGFWEALGGK | Yes               | 758.03                 | 623.4                 | 21.06                       | 98.8                     | 33.2                | 6798                            | 1117023                   | 1289572                   | Yes (Based on<br>Transition<br>Ratios) |

**Table S5.** MRM assay of individual proteins.

| Protein<br>(_HUMAN) | Peptide                  | MS/MS<br>spectrum | Precursor ion<br>(m/z) | Fragment ion<br>(m/z) | Retention time<br>(minutes) | Declustering<br>potential | Collision<br>energy | Area of<br>synthetic<br>peptide | Area in control<br>sample | Area in disease<br>sample | Interference |
|---------------------|--------------------------|-------------------|------------------------|-----------------------|-----------------------------|---------------------------|---------------------|---------------------------------|---------------------------|---------------------------|--------------|
| GELS                | AQPVQVAEGSEPDGFWEALGGK   | Yes               | 758.03                 | 964.5                 | 21.06                       | 98.8                      | 36.2                | ND                              | 435840                    | 483999                    | No           |
| GELS                | EPGLQIWR                 | Yes               | 499.77                 | 361.2                 | 16.37                       | 65.5                      | 24.5                | 38296                           | 145881                    | 189051                    | No           |
| GELS                | EPGLQIWR                 | Yes               | 499.77                 | 474.3                 | 16.37                       | 65.5                      | 24.5                | 29025                           | 112499                    | 119758                    | No           |
| GELS                | EPGLQIWR                 | Yes               | 499.77                 | 602.3                 | 16.37                       | 65.5                      | 24.5                | 29313                           | 98531                     | 131620                    | No           |
| GELS                | EPGLQIWR                 | Yes               | 499.77                 | 772.4                 | 16.37                       | 65.5                      | 33.5                | 10154                           | 35833                     | 46838                     | No           |
| GELS                | FDLVPVPTNLYGDFFTGDAYVILK | No                |                        |                       |                             |                           |                     |                                 |                           |                           |              |
| GELS                | TASDFITK                 | Yes               | 441.73                 | 508.3                 | 9.72                        | 58                        | 24.9                | 96930                           | 1110983                   | 983434                    | No           |
| GELS                | TASDFITK                 | Yes               | 441.73                 | 623.3                 | 9.72                        | 58                        | 21.9                | 48373                           | 377884                    | 403974                    | No           |
| GELS                | TASDFITK                 | Yes               | 441.73                 | 710.4                 | 9.72                        | 58                        | 21.9                | 823945                          | 6477637                   | 6712576                   | No           |
| GELS                | TASDFITK                 | Yes               | 441.73                 | 781.4                 | 9.72                        | 58                        | 21.9                | 124084                          | 1053469                   | 1135052                   | No           |
| GELS                | TPSAAYLWVGTGASEAEK       | Yes               | 919.45                 | 428.2                 | 17.09                       | 119.6                     | 49                  | 7386                            | 84966                     | 111772                    | No           |
| GELS                | TPSAAYLWVGTGASEAEK       | Yes               | 919.45                 | 591.3                 | 17.09                       | 119.6                     | 46                  | 6289                            | 68514                     | 105592                    | No           |
| GELS                | TPSAAYLWVGTGASEAEK       | Yes               | 919.45                 | 704.4                 | 17.09                       | 119.6                     | 43                  | 5668                            | 70031                     | 70186                     | No           |
| GELS                | TPSAAYLWVGTGASEAEK       | Yes               | 919.45                 | 849.4                 | 17.09                       | 119.6                     | 43                  | 10488                           | 143036                    | 193849                    | No           |
| GGH                 | DYEILFK                  | Yes               | 464.25                 | 294.2                 | 17.32                       | 60.9                      | 31.9                | 684607                          | ND                        | ND                        | No           |
| GGH                 | DYEILFK                  | Yes               | 464.25                 | 407.3                 | 17.32                       | 60.9                      | 19.9                | 167814                          | ND                        | ND                        | No           |
| GGH                 | DYEILFK                  | Yes               | 464.25                 | 520.3                 | 17.32                       | 60.9                      | 22.9                | 222792                          | ND                        | ND                        | No           |
| GGH                 | DYEILFK                  | Yes               | 464.25                 | 649.4                 | 17.32                       | 60.9                      | 22.9                | 434097                          | ND                        | ND                        | No           |
| GGH                 | NLDGISHAPNAVK            | Yes               | 445.91                 | 528.3                 | 9.69                        | 58.5                      | 29.3                | 189251                          | 21130                     | 14582                     | No           |
| GGH                 | NLDGISHAPNAVK            | Yes               | 445.91                 | 599.4                 | 9.69                        | 58.5                      | 26.3                | 138915                          | 18079                     | 15936                     | No           |
| GGH                 | NLDGISHAPNAVK            | Yes               | 445.91                 | 736.4                 | 9.69                        | 58.5                      | 23.3                | 31746                           | 5487                      | 5799                      | No           |
| GGH                 | NLDGISHAPNAVK            | Yes               | 445.91                 | 823.4                 | 9.69                        | 58.5                      | 20.3                | 32039                           | 3979                      | 5855                      | No           |
| GGH                 | YLESAGAR                 | No                |                        |                       |                             |                           |                     |                                 |                           |                           |              |

**Table S5.** MRM assay of individual proteins.

| Protein<br>(_HUMAN) | Peptide                   | MS/MS<br>spectrum | Precursor ion<br>(m/z) | Fragment ion<br>(m/z) | Retention time<br>(minutes) | Declustering<br>potential | Collision<br>energy | Area of<br>synthetic<br>peptide | Area in control<br>sample | Area in disease<br>sample | Interference                           |
|---------------------|---------------------------|-------------------|------------------------|-----------------------|-----------------------------|---------------------------|---------------------|---------------------------------|---------------------------|---------------------------|----------------------------------------|
| GGH                 | YPVYGVQWHPEK              | Yes               | 501.59                 | 360.2                 | 13.92                       | 65.7                      | 23.1                | 31686                           | ND                        | ND                        | No                                     |
| GGH                 | YPVYGVQWHPEK              | Yes               | 501.59                 | 373.2                 | 13.92                       | 65.7                      | 29.1                | 185190                          | ND                        | ND                        | No                                     |
| GGH                 | YPVYGVQWHPEK              | Yes               | 501.59                 | 696.3                 | 13.92                       | 65.7                      | 23.1                | 16067                           | ND                        | ND                        | No                                     |
| GGH                 | YPVYGVQWHPEK              | Yes               | 501.59                 | 980.5                 | 13.92                       | 65.7                      | 32.1                | 6030                            | ND                        | ND                        | No                                     |
| GGH                 | YYIAASYVK                 | Yes               | 539.28                 | 567.3                 | 12.97                       | 70.6                      | 26.2                | ND                              | 19751                     | 5473                      | Yes (Based on<br>Manual<br>Review)     |
| GGH                 | YYIAASYVK                 | Yes               | 539.28                 | 638.4                 | 12.97                       | 70.6                      | 26.2                | 184756                          | 35965                     | 33185                     | No                                     |
| GGH                 | YYIAASYVK                 | Yes               | 539.28                 | 751.4                 | 12.97                       | 70.6                      | 26.2                | 261730                          | 46876                     | 38678                     | No                                     |
| GGH                 | YYIAASYVK                 | Yes               | 539.28                 | 914.5                 | 12.97                       | 70.6                      | 35.2                | 7158                            | 3258                      | 2454                      | No                                     |
| GPC3                | FLAELAYDLVDVDDAPGNSQQATPK | Yes               | 860.08                 | 345.2                 | 20.88                       | 112                       | 41.4                | 4492                            | ND                        | ND                        | No                                     |
| GPC3                | FLAELAYDLVDVDDAPGNSQQATPK | Yes               | 860.08                 | 574.3                 | 20.88                       | 112                       | 50.4                | 3137                            | ND                        | ND                        | No                                     |
| GPC3                | FLAELAYDLVDVDDAPGNSQQATPK | Yes               | 860.08                 | 645.4                 | 20.88                       | 112                       | 38.4                | 4501                            | ND                        | ND                        | No                                     |
| GPC3                | FLAELAYDLVDVDDAPGNSQQATPK | Yes               | 860.08                 | 930.5                 | 20.88                       | 112                       | 41.4                | 3101                            | ND                        | ND                        | No                                     |
| GPC3                | FLIIQNAAVFQEAFEIVVR       | No                |                        |                       |                             |                           |                     |                                 |                           |                           |                                        |
| GPC3                | GPEPVVSQIIDK              | No                |                        |                       |                             |                           |                     |                                 |                           |                           |                                        |
| GPC3                | IFLQALNLGIEVINTTDHLK      | No                |                        |                       |                             |                           |                     |                                 |                           |                           |                                        |
| GPC3                | NQFNLHELK                 | Yes               | 381.54                 | 260.2                 | 12.20                       | 50.2                      | 20                  | 93058                           | ND                        | 6427                      | No                                     |
| GPC3                | NQFNLHELK                 | Yes               | 381.54                 | 526.3                 | 12.20                       | 50.2                      | 23                  | 83200                           | ND                        | 2627                      | No                                     |
| GPC3                | NQFNLHELK                 | Yes               | 381.54                 | 639.4                 | 12.20                       | 50.2                      | 23                  | 17834                           | ND                        | ND                        | No                                     |
| GPC3                | NQFNLHELK                 | Yes               | 381.54                 | 753.4                 | 12.20                       | 50.2                      | 17                  | 6821                            | ND                        | 2107                      | Yes (Based on<br>Transition<br>Ratios) |
| GRAN                | ELWAALNAWK                | Yes               | 601.32                 | 631.4                 | 21.98                       | 78.6                      | 29                  | 46323                           | ND                        | ND                        | No                                     |

**Table S5.** MRM assay of individual proteins.

| Protein<br>(_HUMAN) | Peptide                | MS/MS<br>spectrum | Precursor ion<br>(m/z) | Fragment ion<br>(m/z) | Retention time<br>(minutes) | Declustering<br>potential | Collision<br>energy | Area of<br>synthetic<br>peptide | Area in control<br>sample | Area in disease<br>sample | Interference                       |
|---------------------|------------------------|-------------------|------------------------|-----------------------|-----------------------------|---------------------------|---------------------|---------------------------------|---------------------------|---------------------------|------------------------------------|
| GRAN                | ELWAALNAWK             | Yes               | 601.32                 | 702.4                 | 21.98                       | 78.6                      | 29                  | 60006                           | ND                        | ND                        | No                                 |
| GRAN                | ELWAALNAWK             | Yes               | 601.32                 | 773.4                 | 21.98                       | 78.6                      | 29                  | 81207                           | ND                        | ND                        | No                                 |
| GRAN                | ELWAALNAWK             | Yes               | 601.32                 | 959.5                 | 21.98                       | 78.6                      | 29                  | 35984                           | ND                        | ND                        | No                                 |
| GREB1               | ASQGPPSAISR            | No                |                        |                       |                             |                           |                     |                                 |                           |                           |                                    |
| GREB1               | EVNYELVTGK             | Yes               | 576.3                  | 305.2                 | 12.42                       | 75.3                      | 27.9                | 497980                          | ND                        | ND                        | No                                 |
| GREB1               | EVNYELVTGK             | Yes               | 576.3                  | 517.3                 | 12.42                       | 75.3                      | 27.9                | 192099                          | ND                        | ND                        | No                                 |
| GREB1               | EVNYELVTGK             | Yes               | 576.3                  | 646.4                 | 12.42                       | 75.3                      | 27.9                | 219258                          | ND                        | ND                        | No                                 |
| GREB1               | EVNYELVTGK             | Yes               | 576.3                  | 923.5                 | 12.42                       | 75.3                      | 27.9                | 111936                          | ND                        | ND                        | No                                 |
| GREB1               | ILSESLTPAEYQK          | Yes               | 531.29                 | 638.3                 | 16.75                       | 69.5                      | 24.6                | 15373                           | ND                        | ND                        | No                                 |
| GREB1               | ILSESLTPAEYQK          | Yes               | 531.29                 | 643.4                 | 16.75                       | 69.5                      | 24.6                | 28528                           | ND                        | ND                        | No                                 |
| GREB1               | ILSESLTPAEYQK          | Yes               | 531.29                 | 735.4                 | 16.75                       | 69.5                      | 21.6                | 79610                           | ND                        | ND                        | No                                 |
| GREB1               | ILSESLTPAEYQK          | Yes               | 531.29                 | 836.4                 | 16.75                       | 69.5                      | 27.6                | 16529                           | ND                        | ND                        | No                                 |
| GREB1               | TALEQELGLAAYFVSNEVPLEK | Yes               | 807.76                 | 486.3                 | 24.62                       | 105.2                     | 41.7                | 53638                           | 80513                     | 58012                     | No                                 |
| GREB1               | TALEQELGLAAYFVSNEVPLEK | Yes               | 807.76                 | 714.4                 | 24.62                       | 105.2                     | 35.7                | ND                              | ND                        | ND                        | Yes (Based on<br>Manual<br>Review) |
| GREB1               | TALEQELGLAAYFVSNEVPLEK | Yes               | 807.76                 | 828.4                 | 24.62                       | 105.2                     | 35.7                | 7463                            | 17458                     | 10822                     | No                                 |
| GREB1               | TALEQELGLAAYFVSNEVPLEK | Yes               | 807.76                 | 915.5                 | 24.62                       | 105.2                     | 35.7                | 14455                           | 16090                     | 13541                     | No                                 |
| GREB1               | TGAYLQFLSVLSR          | Yes               | 727.9                  | 561.3                 | 24.43                       | 94.9                      | 37.5                | 21162                           | ND                        | ND                        | No                                 |
| GREB1               | TGAYLQFLSVLSR          | Yes               | 727.9                  | 674.4                 | 24.43                       | 94.9                      | 34.5                | 13033                           | ND                        | ND                        | No                                 |
| GREB1               | TGAYLQFLSVLSR          | Yes               | 727.9                  | 821.5                 | 24.43                       | 94.9                      | 34.5                | 30127                           | ND                        | ND                        | No                                 |
| GREB1               | TGAYLQFLSVLSR          | Yes               | 727.9                  | 949.5                 | 24.43                       | 94.9                      | 31.5                | 16085                           | ND                        | ND                        | No                                 |
| GREM1               | AQHNDSEQTQSPQPGSR      | No                |                        |                       |                             |                           |                     |                                 |                           |                           |                                    |
| GRP                 | ALGNQQPSWDSSEDSSNFK    | Yes               | 1005.45                | 484.3                 | 12.96                       | 130.7                     | 46.7                | 5561                            | ND                        | ND                        | No                                 |

**Table S5.** MRM assay of individual proteins.

| Protein<br>(_HUMAN) | Peptide            | MS/MS<br>spectrum | Precursor ion<br>(m/z) | Fragment ion<br>(m/z) | Retention time<br>(minutes) | Declustering<br>potential | Collision<br>energy | Area of<br>synthetic<br>peptide | Area in control<br>sample | Area in disease<br>sample | Interference |
|---------------------|--------------------|-------------------|------------------------|-----------------------|-----------------------------|---------------------------|---------------------|---------------------------------|---------------------------|---------------------------|--------------|
| GRP                 | ALGNQQPSWDESSNFK   | Yes               | 1005.45                | 582.3                 | 12.96                       | 130.7                     | 52.7                | 5673                            | ND                        | ND                        | No           |
| GRP                 | ALGNQQPSWDESSNFK   | Yes               | 1005.45                | 612.3                 | 12.96                       | 130.7                     | 46.7                | 7849                            | ND                        | ND                        | No           |
| GRP                 | ALGNQQPSWDESSNFK   | Yes               | 1005.45                | 913.4                 | 12.96                       | 130.7                     | 46.7                | 3338                            | ND                        | ND                        | No           |
| GRP                 | AVPLPAGGGTVLTK     | Yes               | 640.88                 | 268.2                 | 13.33                       | 83.7                      | 30.7                | 312921                          | ND                        | ND                        | No           |
| GRP                 | AVPLPAGGGTVLTK     | Yes               | 640.88                 | 732.4                 | 13.33                       | 83.7                      | 36.7                | 166500                          | ND                        | ND                        | No           |
| GRP                 | AVPLPAGGGTVLTK     | Yes               | 640.88                 | 803.5                 | 13.33                       | 83.7                      | 39.7                | 122645                          | ND                        | ND                        | No           |
| GRP                 | AVPLPAGGGTVLTK     | Yes               | 640.88                 | 900.5                 | 13.33                       | 83.7                      | 30.7                | 383936                          | ND                        | ND                        | No           |
| GRP                 | LSAPGSQR           | Yes               | 408.22                 | 272.2                 | 6.34                        | 53.7                      | 20.5                | 45181                           | ND                        | ND                        | No           |
| GRP                 | LSAPGSQR           | Yes               | 408.22                 | 544.3                 | 6.34                        | 53.7                      | 20.5                | 101248                          | ND                        | ND                        | No           |
| GRP                 | LSAPGSQR           | Yes               | 408.22                 | 615.3                 | 6.34                        | 53.7                      | 20.5                | 28471                           | ND                        | ND                        | No           |
| GRP                 | LSAPGSQR           | Yes               | 408.22                 | 702.4                 | 6.34                        | 53.7                      | 20.5                | 19402                           | ND                        | ND                        | No           |
| GRP                 | NLLGLIEAK          | Yes               | 485.8                  | 341.2                 | 20.30                       | 63.7                      | 20.9                | 289061                          | ND                        | ND                        | No           |
| GRP                 | NLLGLIEAK          | Yes               | 485.8                  | 460.3                 | 20.30                       | 63.7                      | 26.9                | 52915                           | ND                        | ND                        | No           |
| GRP                 | NLLGLIEAK          | Yes               | 485.8                  | 630.4                 | 20.30                       | 63.7                      | 20.9                | 392202                          | ND                        | ND                        | No           |
| GRP                 | NLLGLIEAK          | Yes               | 485.8                  | 743.5                 | 20.30                       | 63.7                      | 23.9                | 527924                          | ND                        | ND                        | No           |
| GRP                 | NPQLNQQ            | No                |                        |                       |                             |                           |                     |                                 |                           |                           |              |
| GRP78               | GVPQIEVTFEIDVNGILR | No                |                        |                       |                             |                           |                     |                                 |                           |                           |              |
| GRP78               | LTPEEIER           | No                |                        |                       |                             |                           |                     |                                 |                           |                           |              |
| GRP78               | LYGSAGPPPTGEEDTAEK | Yes               | 909.92                 | 334.2                 | 9.16                        | 118.4                     | 51.5                | 14470                           | ND                        | ND                        | No           |
| GRP78               | LYGSAGPPPTGEEDTAEK | Yes               | 909.92                 | 492.2                 | 9.16                        | 118.4                     | 42.5                | 9477                            | ND                        | ND                        | No           |
| GRP78               | LYGSAGPPPTGEEDTAEK | Yes               | 909.92                 | 549.3                 | 9.16                        | 118.4                     | 39.5                | 12433                           | ND                        | ND                        | No           |
| GRP78               | LYGSAGPPPTGEEDTAEK | Yes               | 909.92                 | 878.4                 | 9.16                        | 118.4                     | 51.5                | 7011                            | ND                        | ND                        | No           |
| GRP78               | TWNDPSVQQDIK       | Yes               | 715.85                 | 260.2                 | 12.10                       | 93.3                      | 43                  | 117575                          | 38607                     | 37974                     | No           |



**Table S5.** MRM assay of individual proteins.

| Protein<br>(_HUMAN) | Peptide      | MS/MS<br>spectrum | Precursor ion<br>(m/z) | Fragment ion<br>(m/z) | Retention time<br>(minutes) | Declustering<br>potential | Collision<br>energy | Area of<br>synthetic<br>peptide | Area in control<br>sample | Area in disease<br>sample | Interference                           |
|---------------------|--------------|-------------------|------------------------|-----------------------|-----------------------------|---------------------------|---------------------|---------------------------------|---------------------------|---------------------------|----------------------------------------|
| GRP78               | TWNDPSVQQDIK | Yes               | 715.85                 | 288.1                 | 12.10                       | 93.3                      | 34                  | 149601                          | 37952                     | 37875                     | No                                     |
| GRP78               | TWNDPSVQQDIK | Yes               | 715.85                 | 517.2                 | 12.10                       | 93.3                      | 31                  | 31831                           | 8135                      | 15704                     | No                                     |
| GRP78               | TWNDPSVQQDIK | Yes               | 715.85                 | 914.5                 | 12.10                       | 93.3                      | 34                  | 27711                           | 12458                     | 15129                     | No                                     |
| GRP78               | VYEGERPLTK   | Yes               | 397.88                 | 458.3                 | 7.57                        | 52.3                      | 26.8                | 30025                           | 5025                      | 4180                      | No                                     |
| GRP78               | VYEGERPLTK   | Yes               | 397.88                 | 614.4                 | 7.57                        | 52.3                      | 26.8                | 18067                           | 3699                      | ND                        | No                                     |
| GRP78               | VYEGERPLTK   | Yes               | 397.88                 | 800.5                 | 7.57                        | 52.3                      | 20.8                | 89615                           | 4277                      | 4630                      | No                                     |
| GRP78               | VYEGERPLTK   | Yes               | 397.88                 | 929.5                 | 7.57                        | 52.3                      | 26.8                | ND                              | ND                        | ND                        | No                                     |
| GSLG1               | IIIQESALDYR  | Yes               | 660.86                 | 338.2                 | 15.11                       | 86.3                      | 40.6                | 33005                           | 69985                     | 79200                     | No                                     |
| GSLG1               | IIIQESALDYR  | Yes               | 660.86                 | 724.4                 | 15.11                       | 86.3                      | 40.6                | 7033                            | ND                        | ND                        | No                                     |
| GSLG1               | IIIQESALDYR  | Yes               | 660.86                 | 853.4                 | 15.11                       | 86.3                      | 34.6                | 5813                            | ND                        | ND                        | No                                     |
| GSLG1               | IIIQESALDYR  | Yes               | 660.86                 | 981.5                 | 15.11                       | 86.3                      | 40.6                | 3419                            | ND                        | ND                        | No                                     |
| GSLG1               | LDPALQDK     | Yes               | 450.25                 | 503.3                 | 8.31                        | 59.1                      | 31.3                | 153201                          | ND                        | ND                        | No                                     |
| GSLG1               | LDPALQDK     | Yes               | 450.25                 | 574.3                 | 8.31                        | 59.1                      | 31.3                | 260964                          | ND                        | ND                        | No                                     |
| GSLG1               | LDPALQDK     | Yes               | 450.25                 | 671.4                 | 8.31                        | 59.1                      | 22.3                | 499839                          | ND                        | ND                        | No                                     |
| GSLG1               | LDPALQDK     | Yes               | 450.25                 | 786.4                 | 8.31                        | 59.1                      | 22.3                | 48377                           | ND                        | ND                        | No                                     |
| GSLG1               | LIAQDYK      | Yes               | 425.74                 | 310.2                 | 8.28                        | 55.9                      | 30.2                | 352025                          | ND                        | ND                        | No                                     |
| GSLG1               | LIAQDYK      | Yes               | 425.74                 | 553.3                 | 8.28                        | 55.9                      | 21.2                | 39457                           | ND                        | ND                        | No                                     |
| GSLG1               | LIAQDYK      | Yes               | 425.74                 | 624.3                 | 8.28                        | 55.9                      | 21.2                | 707457                          | ND                        | ND                        | No                                     |
| GSLG1               | LIAQDYK      | Yes               | 425.74                 | 737.4                 | 8.28                        | 55.9                      | 21.2                | 92099                           | ND                        | ND                        | No                                     |
| GSLG1               | NDINILK      | Yes               | 415.24                 | 260.2                 | 12.27                       | 54.6                      | 26.8                | 3113670                         | 30155                     | ND                        | Yes (Based on<br>Transition<br>Ratios) |
| GSLG1               | NDINILK      | Yes               | 415.24                 | 487.3                 | 12.27                       | 54.6                      | 20.8                | 118856                          | ND                        | ND                        | No                                     |
| GSLG1               | NDINILK      | Yes               | 415.24                 | 600.4                 | 12.27                       | 54.6                      | 20.8                | 109536                          | 12160                     | 5682                      | Yes (Based on                          |

**Table S5.** MRM assay of individual proteins.

| Protein<br>(_HUMAN) | Peptide                         | MS/MS<br>spectrum | Precursor ion<br>(m/z) | Fragment ion<br>(m/z) | Retention time<br>(minutes) | Declustering<br>potential | Collision<br>energy | Area of<br>synthetic<br>peptide | Area in control<br>sample | Area in disease<br>sample | Interference<br><br>(Transition<br>Ratios) |
|---------------------|---------------------------------|-------------------|------------------------|-----------------------|-----------------------------|---------------------------|---------------------|---------------------------------|---------------------------|---------------------------|--------------------------------------------|
| GSLG1               | NDINILK                         | Yes               | 415.24                 | 715.4                 | 12.27                       | 54.6                      | 20.8                | 41568                           | ND                        | ND                        | No                                         |
| GSLG1               | VAELSSDDFHLDR                   | Yes               | 501.91                 | 403.2                 | 14.18                       | 65.7                      | 32.1                | 39562                           | ND                        | ND                        | No                                         |
| GSLG1               | VAELSSDDFHLDR                   | Yes               | 501.91                 | 540.3                 | 14.18                       | 65.7                      | 29.1                | 21425                           | ND                        | ND                        | No                                         |
| GSLG1               | VAELSSDDFHLDR                   | Yes               | 501.91                 | 687.4                 | 14.18                       | 65.7                      | 29.1                | 13431                           | ND                        | ND                        | No                                         |
| GSLG1               | VAELSSDDFHLDR                   | Yes               | 501.91                 | 702.3                 | 14.18                       | 65.7                      | 23.1                | 7013                            | ND                        | ND                        | No                                         |
| GSTP1               | AFLASPEYVNLPIGNGK               | Yes               | 952.5                  | 332.2                 | 18.87                       | 123.9                     | 41.4                | 23819                           | ND                        | ND                        | No                                         |
| GSTP1               | AFLASPEYVNLPIGNGK               | Yes               | 952.5                  | 489.2                 | 18.87                       | 123.9                     | 53.4                | 12541                           | ND                        | ND                        | No                                         |
| GSTP1               | AFLASPEYVNLPIGNGK               | Yes               | 952.5                  | 699.4                 | 18.87                       | 123.9                     | 50.4                | 30955                           | ND                        | ND                        | No                                         |
| GSTP1               | AFLASPEYVNLPIGNGK               | Yes               | 952.5                  | 926.5                 | 18.87                       | 123.9                     | 53.4                | 7734                            | ND                        | ND                        | No                                         |
| GSTP1               | ALPGQLKPFETLLSQNGGK             | Yes               | 709.39                 | 261.2                 | 19.96                       | 92.5                      | 42.7                | 71103                           | ND                        | ND                        | No                                         |
| GSTP1               | ALPGQLKPFETLLSQNGGK             | Yes               | 709.39                 | 503.3                 | 19.96                       | 92.5                      | 42.7                | 55795                           | ND                        | ND                        | No                                         |
| GSTP1               | ALPGQLKPFETLLSQNGGK             | Yes               | 709.39                 | 631.3                 | 19.96                       | 92.5                      | 33.7                | 45630                           | ND                        | ND                        | No                                         |
| GSTP1               | ALPGQLKPFETLLSQNGGK             | Yes               | 709.39                 | 831.4                 | 19.96                       | 92.5                      | 30.7                | 151412                          | ND                        | ND                        | No                                         |
| GSTP1               | EEVVTVETWQEGSLK                 | No                |                        |                       |                             |                           |                     |                                 |                           |                           |                                            |
| GSTP1               | FQDGDLTLYQSNTILR                | No                |                        |                       |                             |                           |                     |                                 |                           |                           |                                            |
| GSTP1               | YISLIYTNYEAGK                   | Yes               | 767.89                 | 277.2                 | 17.39                       | 100.1                     | 33.3                | 34906                           | ND                        | ND                        | No                                         |
| GSTP1               | YISLIYTNYEAGK                   | Yes               | 767.89                 | 364.2                 | 17.39                       | 100.1                     | 39.3                | 28066                           | ND                        | ND                        | No                                         |
| GSTP1               | YISLIYTNYEAGK                   | Yes               | 767.89                 | 477.3                 | 17.39                       | 100.1                     | 33.3                | 14079                           | ND                        | ND                        | No                                         |
| GSTP1               | YISLIYTNYEAGK                   | Yes               | 767.89                 | 945.4                 | 17.39                       | 100.1                     | 36.3                | 23839                           | ND                        | ND                        | No                                         |
| GTR1                | AGVQQPVYATIGSGIVNTAFTVVSFLVVER  | No                |                        |                       |                             |                           |                     |                                 |                           |                           |                                            |
| GTR1                | QPILIAVVLQLSQQLSGINAVFYYSTSIFEK | No                |                        |                       |                             |                           |                     |                                 |                           |                           |                                            |

**Table S5.** MRM assay of individual proteins.

| Protein<br>(_HUMAN) | Peptide                         | MS/MS<br>spectrum | Precursor ion<br>(m/z) | Fragment ion<br>(m/z) | Retention time<br>(minutes) | Declustering<br>potential | Collision<br>energy | Area of<br>synthetic<br>peptide | Area in control<br>sample | Area in disease<br>sample | Interference |
|---------------------|---------------------------------|-------------------|------------------------|-----------------------|-----------------------------|---------------------------|---------------------|---------------------------------|---------------------------|---------------------------|--------------|
| GTR1                | TFDEIASGFR                      | Yes               | 571.78                 | 466.2                 | 15.92                       | 74.8                      | 27.7                | 109067                          | ND                        | ND                        | No           |
| GTR1                | TFDEIASGFR                      | Yes               | 571.78                 | 537.3                 | 15.92                       | 74.8                      | 27.7                | 352766                          | ND                        | ND                        | No           |
| GTR1                | TFDEIASGFR                      | Yes               | 571.78                 | 650.4                 | 15.92                       | 74.8                      | 36.7                | 103882                          | ND                        | ND                        | No           |
| GTR1                | TFDEIASGFR                      | Yes               | 571.78                 | 894.4                 | 15.92                       | 74.8                      | 27.7                | 241044                          | ND                        | ND                        | No           |
| GTR1                | TPEELFHPLGADSQV                 | Yes               | 820.4                  | 457.2                 | 18.24                       | 106.8                     | 41.6                | 20663                           | ND                        | ND                        | No           |
| GTR1                | TPEELFHPLGADSQV                 | Yes               | 820.4                  | 717.3                 | 18.24                       | 106.8                     | 38.6                | 9811                            | ND                        | ND                        | No           |
| GTR1                | TPEELFHPLGADSQV                 | Yes               | 820.4                  | 786.4                 | 18.24                       | 106.8                     | 38.6                | 30658                           | ND                        | ND                        | No           |
| GTR1                | TPEELFHPLGADSQV                 | Yes               | 820.4                  | 854.4                 | 18.24                       | 106.8                     | 38.6                | 21689                           | ND                        | ND                        | No           |
| GTR1                | VIEEFYNQTWVHR                   | Yes               | 574.29                 | 312.2                 | 16.13                       | 75.1                      | 32.8                | 27635                           | 20284                     | 10172                     | No           |
| GTR1                | VIEEFYNQTWVHR                   | Yes               | 574.29                 | 411.2                 | 16.13                       | 75.1                      | 32.8                | 15033                           | 3047                      | ND                        | No           |
| GTR1                | VIEEFYNQTWVHR                   | Yes               | 574.29                 | 597.3                 | 16.13                       | 75.1                      | 32.8                | 11958                           | 2870                      | 3085                      | No           |
| GTR1                | VIEEFYNQTWVHR                   | Yes               | 574.29                 | 698.4                 | 16.13                       | 75.1                      | 35.8                | 8496                            | 6444                      | ND                        | No           |
| GTR3                | AFEGQAHGADR                     | Yes               | 579.77                 | 418.2                 | 6.62                        | 75.8                      | 37                  | 202946                          | ND                        | ND                        | No           |
| GTR3                | AFEGQAHGADR                     | Yes               | 579.77                 | 555.3                 | 6.62                        | 75.8                      | 31                  | 162420                          | ND                        | ND                        | No           |
| GTR3                | AFEGQAHGADR                     | Yes               | 579.77                 | 626.3                 | 6.62                        | 75.8                      | 37                  | 163316                          | ND                        | ND                        | No           |
| GTR3                | AFEGQAHGADR                     | Yes               | 579.77                 | 940.4                 | 6.62                        | 75.8                      | 31                  | 85746                           | ND                        | ND                        | No           |
| GTR3                | DAGVQEPIYATIGAGVVNTIFTVVSLFLVER | No                |                        |                       |                             |                           |                     |                                 |                           |                           |              |
| GTR3                | DGVMEMNSIEPAK                   | Yes               | 710.83                 | 315.2                 | 15.01                       | 92.7                      | 42.8                | 651156                          | ND                        | ND                        | No           |
| GTR3                | DGVMEMNSIEPAK                   | Yes               | 710.83                 | 444.2                 | 15.01                       | 92.7                      | 42.8                | 131000                          | ND                        | ND                        | No           |
| GTR3                | DGVMEMNSIEPAK                   | Yes               | 710.83                 | 758.4                 | 15.01                       | 92.7                      | 33.8                | 126153                          | ND                        | ND                        | No           |
| GTR3                | DGVMEMNSIEPAK                   | Yes               | 710.83                 | 889.4                 | 15.01                       | 92.7                      | 33.8                | 165465                          | ND                        | ND                        | No           |
| GTR3                | FLLINR                          | Yes               | 388.25                 | 261.2                 | 17.40                       | 51.1                      | 19.6                | 38683431                        | ND                        | ND                        | No           |
| GTR3                | FLLINR                          | Yes               | 388.25                 | 289.2                 | 17.40                       | 51.1                      | 28.6                | 6071848                         | ND                        | ND                        | No           |

**Table S5.** MRM assay of individual proteins.

| Protein<br>(_HUMAN) | Peptide                         | MS/MS<br>spectrum | Precursor ion<br>(m/z) | Fragment ion<br>(m/z) | Retention time<br>(minutes) | Declustering<br>potential | Collision<br>energy | Area of<br>synthetic<br>peptide | Area in control<br>sample | Area in disease<br>sample | Interference |
|---------------------|---------------------------------|-------------------|------------------------|-----------------------|-----------------------------|---------------------------|---------------------|---------------------------------|---------------------------|---------------------------|--------------|
| GTR3                | FLLINR                          | Yes               | 388.25                 | 515.3                 | 17.40                       | 51.1                      | 19.6                | 49971898                        | ND                        | ND                        | No           |
| GTR3                | FLLINR                          | Yes               | 388.25                 | 628.4                 | 17.40                       | 51.1                      | 19.6                | 8139252                         | ND                        | ND                        | No           |
| GTR3                | LWGTQDVSQDIQEMK                 | No                |                        |                       |                             |                           |                     |                                 |                           |                           |              |
| GTR3                | QPIIISIVLQLSQQLSGINAVFYYSTGIFK  | No                |                        |                       |                             |                           |                     |                                 |                           |                           |              |
| GTR3                | QVTVLELFR                       | Yes               | 552.82                 | 435.3                 | 23.99                       | 72.3                      | 35.8                | 377428                          | ND                        | ND                        | No           |
| GTR3                | QVTVLELFR                       | Yes               | 552.82                 | 677.4                 | 23.99                       | 72.3                      | 26.8                | 949411                          | ND                        | ND                        | No           |
| GTR3                | QVTVLELFR                       | Yes               | 552.82                 | 776.5                 | 23.99                       | 72.3                      | 29.8                | 325275                          | ND                        | ND                        | No           |
| GTR3                | QVTVLELFR                       | Yes               | 552.82                 | 877.5                 | 23.99                       | 72.3                      | 26.8                | 951549                          | ND                        | ND                        | No           |
| GTR3                | SVEMLILGR                       | Yes               | 509.29                 | 458.3                 | 20.26                       | 66.7                      | 33.9                | 2020205                         | ND                        | ND                        | No           |
| GTR3                | SVEMLILGR                       | Yes               | 509.29                 | 571.4                 | 20.26                       | 66.7                      | 33.9                | 2117179                         | ND                        | ND                        | No           |
| GTR3                | SVEMLILGR                       | Yes               | 509.29                 | 702.4                 | 20.26                       | 66.7                      | 24.9                | 1909577                         | ND                        | ND                        | No           |
| GTR3                | SVEMLILGR                       | Yes               | 509.29                 | 831.5                 | 20.26                       | 66.7                      | 24.9                | 5305893                         | ND                        | ND                        | No           |
| GTR3                | TFEDITR                         | Yes               | 441.22                 | 276.2                 | 11.87                       | 57.9                      | 30.9                | 373896                          | ND                        | ND                        | No           |
| GTR3                | TFEDITR                         | Yes               | 441.22                 | 389.3                 | 11.87                       | 57.9                      | 30.9                | 1351614                         | ND                        | ND                        | No           |
| GTR3                | TFEDITR                         | Yes               | 441.22                 | 504.3                 | 11.87                       | 57.9                      | 24.9                | 1422622                         | ND                        | ND                        | No           |
| GTR3                | TFEDITR                         | Yes               | 441.22                 | 633.3                 | 11.87                       | 57.9                      | 21.9                | 4958845                         | ND                        | ND                        | No           |
| GTR3                | VTPALIFAITVATIGSFQFGYNTGVINAPEK | No                |                        |                       |                             |                           |                     |                                 |                           |                           |              |
| H2A1                | AGLQFPVGR                       | No                |                        |                       |                             |                           |                     |                                 |                           |                           |              |
| H2A1                | HLQLAIR                         | No                |                        |                       |                             |                           |                     |                                 |                           |                           |              |
| H2A1                | NDEELNK                         | Yes               | 431.2                  | 261.2                 | 5.76                        | 56.6                      | 30.5                | 358680                          | ND                        | ND                        | No           |
| H2A1                | NDEELNK                         | Yes               | 431.2                  | 503.3                 | 5.76                        | 56.6                      | 21.5                | 148320                          | ND                        | ND                        | No           |
| H2A1                | NDEELNK                         | Yes               | 431.2                  | 632.3                 | 5.76                        | 56.6                      | 18.5                | 219226                          | ND                        | ND                        | No           |
| H2A1                | NDEELNK                         | Yes               | 431.2                  | 747.4                 | 5.76                        | 56.6                      | 18.5                | 103303                          | ND                        | ND                        | No           |

**Table S5.** MRM assay of individual proteins.

| Protein<br>(_HUMAN) | Peptide                        | MS/MS<br>spectrum | Precursor ion<br>(m/z) | Fragment ion<br>(m/z) | Retention time<br>(minutes) | Decustering<br>potential | Collision<br>energy | Area of<br>synthetic<br>peptide | Area in control<br>sample | Area in disease<br>sample | Interference |
|---------------------|--------------------------------|-------------------|------------------------|-----------------------|-----------------------------|--------------------------|---------------------|---------------------------------|---------------------------|---------------------------|--------------|
| H2A1                | VGAGAPVYLAADVLEYLTAEILELAGNAAR | Yes               | 972.53                 | 488.3                 | 24.83                       | 126.5                    | 53.1                | ND                              | ND                        | ND                        |              |
| H2A1                | VGAGAPVYLAADVLEYLTAEILELAGNAAR | Yes               | 972.53                 | 559.3                 | 24.83                       | 126.5                    | 50.1                | ND                              | ND                        | ND                        |              |
| H2A1                | VGAGAPVYLAADVLEYLTAEILELAGNAAR | Yes               | 972.53                 | 672.4                 | 24.83                       | 126.5                    | 53.1                | ND                              | ND                        | ND                        |              |
| H2A1                | VGAGAPVYLAADVLEYLTAEILELAGNAAR | Yes               | 972.53                 | 914.5                 | 24.83                       | 126.5                    | 44.1                | ND                              | ND                        | ND                        |              |
| H2A1B               | AGLQFPVGR                      | No                |                        |                       |                             |                          |                     |                                 |                           |                           |              |
| H2A1B               | HLQLAIR                        | No                |                        |                       |                             |                          |                     |                                 |                           |                           |              |
| H2A1B               | NDEELNK                        | Yes               | 431.2                  | 261.2                 | 5.76                        | 56.6                     | 30.5                | 358680                          | ND                        | ND                        | No           |
| H2A1B               | NDEELNK                        | Yes               | 431.2                  | 503.3                 | 5.76                        | 56.6                     | 21.5                | 148320                          | ND                        | ND                        | No           |
| H2A1B               | NDEELNK                        | Yes               | 431.2                  | 632.3                 | 5.76                        | 56.6                     | 18.5                | 219226                          | ND                        | ND                        | No           |
| H2A1B               | NDEELNK                        | Yes               | 431.2                  | 747.4                 | 5.76                        | 56.6                     | 18.5                | 103303                          | ND                        | ND                        | No           |
| H2A1B               | VGAGAPVYLAADVLEYLTAEILELAGNAAR | Yes               | 972.53                 | 488.3                 | 24.83                       | 126.5                    | 53.1                | ND                              | ND                        | ND                        |              |
| H2A1B               | VGAGAPVYLAADVLEYLTAEILELAGNAAR | Yes               | 972.53                 | 559.3                 | 24.83                       | 126.5                    | 50.1                | ND                              | ND                        | ND                        |              |
| H2A1B               | VGAGAPVYLAADVLEYLTAEILELAGNAAR | Yes               | 972.53                 | 672.4                 | 24.83                       | 126.5                    | 53.1                | ND                              | ND                        | ND                        |              |
| H2A1B               | VGAGAPVYLAADVLEYLTAEILELAGNAAR | Yes               | 972.53                 | 914.5                 | 24.83                       | 126.5                    | 44.1                | ND                              | ND                        | ND                        |              |
| H2A1C               | AGLQFPVGR                      | No                |                        |                       |                             |                          |                     |                                 |                           |                           |              |
| H2A1C               | HLQLAIR                        | No                |                        |                       |                             |                          |                     |                                 |                           |                           |              |
| H2A1C               | NDEELNK                        | Yes               | 431.2                  | 261.2                 | 5.76                        | 56.6                     | 30.5                | 358680                          | ND                        | ND                        | No           |
| H2A1C               | NDEELNK                        | Yes               | 431.2                  | 503.3                 | 5.76                        | 56.6                     | 21.5                | 148320                          | ND                        | ND                        | No           |
| H2A1C               | NDEELNK                        | Yes               | 431.2                  | 632.3                 | 5.76                        | 56.6                     | 18.5                | 219226                          | ND                        | ND                        | No           |
| H2A1C               | NDEELNK                        | Yes               | 431.2                  | 747.4                 | 5.76                        | 56.6                     | 18.5                | 103303                          | ND                        | ND                        | No           |
| H2A1C               | VGAGAPVYLAADVLEYLTAEILELAGNAAR | Yes               | 972.53                 | 488.3                 | 24.83                       | 126.5                    | 53.1                | ND                              | ND                        | ND                        |              |
| H2A1C               | VGAGAPVYLAADVLEYLTAEILELAGNAAR | Yes               | 972.53                 | 559.3                 | 24.83                       | 126.5                    | 50.1                | ND                              | ND                        | ND                        |              |
| H2A1C               | VGAGAPVYLAADVLEYLTAEILELAGNAAR | Yes               | 972.53                 | 672.4                 | 24.83                       | 126.5                    | 53.1                | ND                              | ND                        | ND                        |              |

**Table S5.** MRM assay of individual proteins.

| Protein<br>(_HUMAN) | Peptide                          | MS/MS<br>spectrum | Precursor ion<br>(m/z) | Fragment ion<br>(m/z) | Retention time<br>(minutes) | Declustering<br>potential | Collision<br>energy | Area of<br>synthetic<br>peptide | Area in control<br>sample | Area in disease<br>sample | Interference |
|---------------------|----------------------------------|-------------------|------------------------|-----------------------|-----------------------------|---------------------------|---------------------|---------------------------------|---------------------------|---------------------------|--------------|
| H2A1C               | VGAGAPVYLAADVLEYLTAEILELAGNAAR   | Yes               | 972.53                 | 914.5                 | 24.83                       | 126.5                     | 44.1                | ND                              | ND                        | ND                        |              |
| H2A1D               | AGLQFPVGR                        | No                |                        |                       |                             |                           |                     |                                 |                           |                           |              |
| H2A1D               | HLQLAIR                          | No                |                        |                       |                             |                           |                     |                                 |                           |                           |              |
| H2A1D               | NDEELNK                          | Yes               | 431.2                  | 261.2                 | 5.76                        | 56.6                      | 30.5                | 358680                          | ND                        | ND                        | No           |
| H2A1D               | NDEELNK                          | Yes               | 431.2                  | 503.3                 | 5.76                        | 56.6                      | 21.5                | 148320                          | ND                        | ND                        | No           |
| H2A1D               | NDEELNK                          | Yes               | 431.2                  | 632.3                 | 5.76                        | 56.6                      | 18.5                | 219226                          | ND                        | ND                        | No           |
| H2A1D               | NDEELNK                          | Yes               | 431.2                  | 747.4                 | 5.76                        | 56.6                      | 18.5                | 103303                          | ND                        | ND                        | No           |
| H2A1D               | VGAGAPVYLAADVLEYLTAEILELAGNAAR   | Yes               | 972.53                 | 488.3                 | 24.83                       | 126.5                     | 53.1                | ND                              | ND                        | ND                        |              |
| H2A1D               | VGAGAPVYLAADVLEYLTAEILELAGNAAR   | Yes               | 972.53                 | 559.3                 | 24.83                       | 126.5                     | 50.1                | ND                              | ND                        | ND                        |              |
| H2A1D               | VGAGAPVYLAADVLEYLTAEILELAGNAAR   | Yes               | 972.53                 | 672.4                 | 24.83                       | 126.5                     | 53.1                | ND                              | ND                        | ND                        |              |
| H2A1D               | VGAGAPVYLAADVLEYLTAEILELAGNAAR   | Yes               | 972.53                 | 914.5                 | 24.83                       | 126.5                     | 44.1                | ND                              | ND                        | ND                        |              |
| HG2A                | GALYTGFSILVTLTLLAGQATTAYFLYQQQGR | No                |                        |                       |                             |                           |                     |                                 |                           |                           |              |
| HG2A                | GSPENLR                          | No                |                        |                       |                             |                           |                     |                                 |                           |                           |              |
| HG2A                | HSLEQKPTDAPPK                    | Yes               | 483.26                 | 341.2                 | 5.90                        | 63.3                      | 31.2                | 284567                          | 14745                     | 9016                      | No           |
| HG2A                | HSLEQKPTDAPPK                    | Yes               | 483.26                 | 412.3                 | 5.90                        | 63.3                      | 25.2                | 130149                          | 5586                      | 4053                      | No           |
| HG2A                | HSLEQKPTDAPPK                    | Yes               | 483.26                 | 595.3                 | 5.90                        | 63.3                      | 25.2                | 84823                           | ND                        | ND                        | No           |
| HG2A                | HSLEQKPTDAPPK                    | Yes               | 483.26                 | 725.4                 | 5.90                        | 63.3                      | 22.2                | 72450                           | ND                        | ND                        | No           |
| HG2A                | LPKPPKPVSK                       | Yes               | 545.85                 | 339.2                 | 7.55                        | 71.4                      | 29.5                | 27425                           | ND                        | ND                        | No           |
| HG2A                | LPKPPKPVSK                       | Yes               | 545.85                 | 655.4                 | 7.55                        | 71.4                      | 35.5                | 11314                           | ND                        | ND                        | No           |
| HG2A                | LPKPPKPVSK                       | Yes               | 545.85                 | 752.5                 | 7.55                        | 71.4                      | 32.5                | 91445                           | ND                        | ND                        | No           |
| HG2A                | LPKPPKPVSK                       | Yes               | 545.85                 | 880.6                 | 7.55                        | 71.4                      | 29.5                | 6838                            | ND                        | ND                        | No           |
| HG2A                | LTVTSQNLQLENLR                   | Yes               | 814.95                 | 999.6                 | 15.91                       | 106.1                     | 38.4                | 3011                            | ND                        | ND                        | No           |
| HG2A                | LTVTSQNLQLENLR                   | Yes               | 814.95                 | 415.3                 | 15.91                       | 106.1                     | 35.4                | 3189                            | ND                        | ND                        | No           |

**Table S5.** MRM assay of individual proteins.

| Protein<br>(_HUMAN) | Peptide        | MS/MS<br>spectrum | Precursor ion<br>(m/z) | Fragment ion<br>(m/z) | Retention time<br>(minutes) | Declustering<br>potential | Collision<br>energy | Area of<br>synthetic<br>peptide | Area in control<br>sample | Area in disease<br>sample | Interference                           |
|---------------------|----------------|-------------------|------------------------|-----------------------|-----------------------------|---------------------------|---------------------|---------------------------------|---------------------------|---------------------------|----------------------------------------|
| HG2A                | LTVTSQNLQLENLR | Yes               | 814.95                 | 644.4                 | 15.91                       | 106.1                     | 47.4                | 3400                            | ND                        | ND                        | No                                     |
| HG2A                | LTVTSQNLQLENLR | Yes               | 814.95                 | 772.4                 | 15.91                       | 106.1                     | 44.4                | 5691                            | ND                        | ND                        | No                                     |
| HGF                 | DYEAWLGIHDVHGR | Yes               | 556.6                  | 369.2                 | 15.95                       | 72.8                      | 34.9                | 36842                           | ND                        | ND                        | No                                     |
| HGF                 | DYEAWLGIHDVHGR | Yes               | 556.6                  | 479.2                 | 15.95                       | 72.8                      | 22.9                | 18086                           | ND                        | ND                        | No                                     |
| HGF                 | DYEAWLGIHDVHGR | Yes               | 556.6                  | 720.4                 | 15.95                       | 72.8                      | 28.9                | 29052                           | ND                        | ND                        | No                                     |
| HGF                 | DYEAWLGIHDVHGR | Yes               | 556.6                  | 890.5                 | 15.95                       | 72.8                      | 34.9                | 24754                           | ND                        | ND                        | No                                     |
| HGF                 | ESWVLTAR       | Yes               | 481.26                 | 347.2                 | 14.31                       | 63.1                      | 23.7                | 108816                          | 14807                     | 6858                      | No                                     |
| HGF                 | ESWVLTAR       | Yes               | 481.26                 | 460.3                 | 14.31                       | 63.1                      | 23.7                | 148806                          | 20539                     | 27008                     | No                                     |
| HGF                 | ESWVLTAR       | Yes               | 481.26                 | 559.4                 | 14.31                       | 63.1                      | 32.7                | 77786                           | 23800                     | 19406                     | No                                     |
| HGF                 | ESWVLTAR       | Yes               | 481.26                 | 745.4                 | 14.31                       | 63.1                      | 23.7                | 16615                           | ND                        | ND                        | No                                     |
| HGF                 | HIFWEPDASK     | Yes               | 615.3                  | 251.2                 | 14.07                       | 80.4                      | 29.6                | 169205                          | ND                        | ND                        | No                                     |
| HGF                 | HIFWEPDASK     | Yes               | 615.3                  | 517.3                 | 14.07                       | 80.4                      | 38.6                | 75524                           | ND                        | ND                        | No                                     |
| HGF                 | HIFWEPDASK     | Yes               | 615.3                  | 832.4                 | 14.07                       | 80.4                      | 38.6                | 5449                            | ND                        | ND                        | No                                     |
| HGF                 | HIFWEPDASK     | Yes               | 615.3                  | 979.5                 | 14.07                       | 80.4                      | 29.6                | 34372                           | ND                        | ND                        | No                                     |
| HGF                 | VVNGIPTR       | Yes               | 428.26                 | 373.2                 | 8.35                        | 56.2                      | 21.3                | 171382                          | ND                        | ND                        | No                                     |
| HGF                 | VVNGIPTR       | Yes               | 428.26                 | 543.3                 | 8.35                        | 56.2                      | 30.3                | 61338                           | ND                        | ND                        | No                                     |
| HGF                 | VVNGIPTR       | Yes               | 428.26                 | 657.4                 | 8.35                        | 56.2                      | 21.3                | 227036                          | ND                        | ND                        | No                                     |
| HGF                 | VVNGIPTR       | Yes               | 428.26                 | 756.4                 | 8.35                        | 56.2                      | 30.3                | 12988                           | ND                        | ND                        | No                                     |
| HGF                 | WDHQTPHR       | Yes               | 359.51                 | 312.2                 | 5.82                        | 47.4                      | 21.9                | 10795                           | 5240                      | 1870                      | No                                     |
| HGF                 | WDHQTPHR       | Yes               | 359.51                 | 409.2                 | 5.82                        | 47.4                      | 24.9                | 14498                           | 18187                     | 10563                     | No                                     |
| HGF                 | WDHQTPHR       | Yes               | 359.51                 | 510.3                 | 5.82                        | 47.4                      | 21.9                | 3774                            | 2846                      | 1852                      | No                                     |
| HGF                 | WDHQTPHR       | Yes               | 359.51                 | 638.3                 | 5.82                        | 47.4                      | 24.9                | 3466                            | 9889                      | 17840                     | Yes (Based on<br>Transition<br>Ratios) |

**Table S5.** MRM assay of individual proteins.

| Protein<br>(_HUMAN) | Peptide           | MS/MS<br>spectrum | Precursor ion<br>(m/z) | Fragment ion<br>(m/z) | Retention time<br>(minutes) | Declustering<br>potential | Collision<br>energy | Area of<br>synthetic<br>peptide | Area in control<br>sample | Area in disease<br>sample | Interference                       |
|---------------------|-------------------|-------------------|------------------------|-----------------------|-----------------------------|---------------------------|---------------------|---------------------------------|---------------------------|---------------------------|------------------------------------|
| HMGA1               | EEEEGISQESSEEEQ   | No                |                        |                       |                             |                           |                     |                                 |                           |                           |                                    |
| HMGA1               | SSQPLASK          | Yes               | 409.22                 | 305.2                 | 5.84                        | 53.8                      | 29.5                | 121228                          | ND                        | ND                        | No                                 |
| HMGA1               | SSQPLASK          | Yes               | 409.22                 | 515.3                 | 5.84                        | 53.8                      | 17.5                | 204593                          | ND                        | ND                        | No                                 |
| HMGA1               | SSQPLASK          | Yes               | 409.22                 | 584.3                 | 5.84                        | 53.8                      | 17.5                | 7491                            | ND                        | ND                        | No                                 |
| HMGA1               | SSQPLASK          | Yes               | 409.22                 | 643.4                 | 5.84                        | 53.8                      | 17.5                | 66697                           | ND                        | ND                        | No                                 |
| HPRT                | FFADLLDYIK        | Yes               | 622.83                 | 295.1                 | 24.59                       | 81.3                      | 26.9                | ND                              | ND                        | ND                        | Yes (Based on<br>Manual<br>Review) |
| HPRT                | FFADLLDYIK        | Yes               | 622.83                 | 764.5                 | 24.59                       | 81.3                      | 26.9                | 123982                          | 12683                     | 7919                      | No                                 |
| HPRT                | FFADLLDYIK        | Yes               | 622.83                 | 879.5                 | 24.59                       | 81.3                      | 29.9                | ND                              | ND                        | 5780                      | Yes (Based on<br>Manual<br>Review) |
| HPRT                | FFADLLDYIK        | Yes               | 622.83                 | 950.5                 | 24.59                       | 81.3                      | 26.9                | ND                              | 6648                      | ND                        | No                                 |
| HPRT                | FVVG YALDYNEYFR   | Yes               | 878.42                 | 322.2                 | 21.85                       | 114.3                     | 44.2                | 2966                            | ND                        | ND                        | No                                 |
| HPRT                | FVVG YALDYNEYFR   | Yes               | 878.42                 | 403.2                 | 21.85                       | 114.3                     | 38.2                | 4633                            | ND                        | ND                        | No                                 |
| HPRT                | FVVG YALDYNEYFR   | Yes               | 878.42                 | 485.3                 | 21.85                       | 114.3                     | 41.2                | 3352                            | ND                        | ND                        | No                                 |
| HPRT                | FVVG YALDYNEYFR   | Yes               | 878.42                 | 728.3                 | 21.85                       | 114.3                     | 44.2                | 3399                            | ND                        | ND                        | No                                 |
| HPRT                | NVLIVEDIIDTGK     | Yes               | 714.9                  | 327.2                 | 21.47                       | 93.2                      | 34                  | 73763                           | ND                        | ND                        | No                                 |
| HPRT                | NVLIVEDIIDTGK     | Yes               | 714.9                  | 761.4                 | 21.47                       | 93.2                      | 43                  | 7195                            | ND                        | ND                        | No                                 |
| HPRT                | NVLIVEDIIDTGK     | Yes               | 714.9                  | 890.4                 | 21.47                       | 93.2                      | 34                  | 14608                           | ND                        | ND                        | No                                 |
| HPRT                | NVLIVEDIIDTGK     | Yes               | 714.9                  | 989.5                 | 21.47                       | 93.2                      | 31                  | 33260                           | ND                        | ND                        | No                                 |
| HPRT                | SVGYKPDFVGF EIPDK | Yes               | 599.97                 | 359.2                 | 18.43                       | 78.4                      | 34.1                | 1617303                         | ND                        | ND                        | No                                 |
| HPRT                | SVGYKPDFVGF EIPDK | Yes               | 599.97                 | 748.4                 | 18.43                       | 78.4                      | 25.1                | 179212                          | ND                        | ND                        | No                                 |
| HPRT                | SVGYKPDFVGF EIPDK | Yes               | 599.97                 | 805.4                 | 18.43                       | 78.4                      | 28.1                | 560936                          | ND                        | ND                        | No                                 |



**Table S5.** MRM assay of individual proteins.

| Protein<br>(_HUMAN) | Peptide            | MS/MS<br>spectrum | Precursor ion<br>(m/z) | Fragment ion<br>(m/z) | Retention time<br>(minutes) | Decustering<br>potential | Collision<br>energy | Area of<br>synthetic<br>peptide | Area in control<br>sample | Area in disease<br>sample | Interference |
|---------------------|--------------------|-------------------|------------------------|-----------------------|-----------------------------|--------------------------|---------------------|---------------------------------|---------------------------|---------------------------|--------------|
| HPRT                | SVGYKPDFVGFVIPDK   | Yes               | 599.97                 | 894.4                 | 18.43                       | 78.4                     | 28.1                | 250225                          | ND                        | ND                        | No           |
| HPRT                | VIGGDDLSTLTGK      | Yes               | 638.34                 | 305.2                 | 14.52                       | 83.3                     | 39.6                | 260470                          | 22697                     | 22738                     | No           |
| HPRT                | VIGGDDLSTLTGK      | Yes               | 638.34                 | 519.3                 | 14.52                       | 83.3                     | 36.6                | 68556                           | 6820                      | 4600                      | No           |
| HPRT                | VIGGDDLSTLTGK      | Yes               | 638.34                 | 606.3                 | 14.52                       | 83.3                     | 36.6                | 169979                          | 22690                     | 12254                     | No           |
| HPRT                | VIGGDDLSTLTGK      | Yes               | 638.34                 | 834.5                 | 14.52                       | 83.3                     | 39.6                | 43930                           | ND                        | ND                        | No           |
| HPSE                | EDFLNPDVLDIFISSVQK | No                |                        |                       |                             |                          |                     |                                 |                           |                           |              |
| HPSE                | FLILLGSPK          | Yes               | 494.32                 | 261.2                 | 20.09                       | 64.8                     | 21.2                | 338489                          | ND                        | ND                        | No           |
| HPSE                | FLILLGSPK          | Yes               | 494.32                 | 614.4                 | 20.09                       | 64.8                     | 24.2                | 146451                          | ND                        | ND                        | No           |
| HPSE                | FLILLGSPK          | Yes               | 494.32                 | 727.5                 | 20.09                       | 64.8                     | 24.2                | 207347                          | ND                        | ND                        | No           |
| HPSE                | FLILLGSPK          | Yes               | 494.32                 | 840.6                 | 20.09                       | 64.8                     | 24.2                | 19142                           | ND                        | ND                        | No           |
| HPSE                | LPYPFSNK           | Yes               | 483.26                 | 261.2                 | 15.34                       | 63.3                     | 29.8                | 1011806                         | ND                        | ND                        | No           |
| HPSE                | LPYPFSNK           | Yes               | 483.26                 | 592.3                 | 15.34                       | 63.3                     | 26.8                | 1487499                         | ND                        | ND                        | No           |
| HPSE                | LPYPFSNK           | Yes               | 483.26                 | 755.4                 | 15.34                       | 63.3                     | 23.8                | 446849                          | ND                        | ND                        | No           |
| HPSE                | LPYPFSNK           | Yes               | 483.26                 | 852.4                 | 15.34                       | 63.3                     | 23.8                | 240499                          | ND                        | ND                        | No           |
| HPSE                | SVQLNGLTLK         | Yes               | 536.82                 | 315.2                 | 15.13                       | 70.2                     | 26.1                | 327247                          | ND                        | ND                        | No           |
| HPSE                | SVQLNGLTLK         | Yes               | 536.82                 | 645.4                 | 15.13                       | 70.2                     | 26.1                | 201502                          | ND                        | ND                        | No           |
| HPSE                | SVQLNGLTLK         | Yes               | 536.82                 | 758.5                 | 15.13                       | 70.2                     | 26.1                | 290963                          | ND                        | ND                        | No           |
| HPSE                | SVQLNGLTLK         | Yes               | 536.82                 | 886.5                 | 15.13                       | 70.2                     | 26.1                | 198064                          | ND                        | ND                        | No           |
| HPSE                | YLLRPLGPHGLLSK     | Yes               | 521.98                 | 347.2                 | 16.37                       | 68.3                     | 30.2                | 23423                           | ND                        | ND                        | No           |
| HPSE                | YLLRPLGPHGLLSK     | Yes               | 521.98                 | 654.4                 | 16.37                       | 68.3                     | 30.2                | 17391                           | ND                        | ND                        | No           |
| HPSE                | YLLRPLGPHGLLSK     | Yes               | 521.98                 | 756.5                 | 16.37                       | 68.3                     | 30.2                | 9021                            | ND                        | ND                        | No           |
| HPSE                | YLLRPLGPHGLLSK     | Yes               | 521.98                 | 813.5                 | 16.37                       | 68.3                     | 30.2                | 62938                           | ND                        | ND                        | No           |
| HPT                 | DYAEVGR            | No                |                        |                       |                             |                          |                     |                                 |                           |                           |              |

**Table S5.** MRM assay of individual proteins.

| Protein<br>(_HUMAN) | Peptide          | MS/MS<br>spectrum | Precursor ion<br>(m/z) | Fragment ion<br>(m/z) | Retention time<br>(minutes) | Declustering<br>potential | Collision<br>energy | Area of<br>synthetic<br>peptide | Area in control<br>sample | Area in disease<br>sample | Interference |
|---------------------|------------------|-------------------|------------------------|-----------------------|-----------------------------|---------------------------|---------------------|---------------------------------|---------------------------|---------------------------|--------------|
| HPT                 | TEGDGVYTLNNEK    | Yes               | 720.34                 | 276.2                 | 10.14                       | 93.9                      | 43.2                | 17841                           | 13045                     | 20290                     | No           |
| HPT                 | TEGDGVYTLNNEK    | Yes               | 720.34                 | 504.2                 | 10.14                       | 93.9                      | 43.2                | 91844                           | 37862                     | 54054                     | No           |
| HPT                 | TEGDGVYTLNNEK    | Yes               | 720.34                 | 559.2                 | 10.14                       | 93.9                      | 31.2                | 83609                           | 42050                     | 58976                     | No           |
| HPT                 | TEGDGVYTLNNEK    | Yes               | 720.34                 | 881.4                 | 10.14                       | 93.9                      | 34.2                | 134179                          | 59901                     | 92959                     | No           |
| HPT                 | VGYVSGWGR        | Yes               | 490.75                 | 320.2                 | 12.67                       | 64.3                      | 24.1                | 52113                           | 1517194                   | 2582783                   | No           |
| HPT                 | VGYVSGWGR        | Yes               | 490.75                 | 562.3                 | 12.67                       | 64.3                      | 24.1                | 61353                           | 2002672                   | 3753143                   | No           |
| HPT                 | VGYVSGWGR        | Yes               | 490.75                 | 661.3                 | 12.67                       | 64.3                      | 24.1                | 20325                           | 491848                    | 956761                    | No           |
| HPT                 | VGYVSGWGR        | Yes               | 490.75                 | 881.4                 | 12.67                       | 64.3                      | 24.1                | 10877                           | 352213                    | 587428                    | No           |
| HPT                 | VTSIQDWVQK       | Yes               | 602.32                 | 560.3                 | 14.77                       | 78.7                      | 38                  | 23492                           | 232078                    | 399588                    | No           |
| HPT                 | VTSIQDWVQK       | Yes               | 602.32                 | 675.3                 | 14.77                       | 78.7                      | 29                  | 16142                           | 228972                    | 311938                    | No           |
| HPT                 | VTSIQDWVQK       | Yes               | 602.32                 | 803.4                 | 14.77                       | 78.7                      | 29                  | 28954                           | 397427                    | 714863                    | No           |
| HPT                 | VTSIQDWVQK       | Yes               | 602.32                 | 916.5                 | 14.77                       | 78.7                      | 29                  | 5465                            | 59084                     | 119399                    | No           |
| HPT                 | VVLHPNYSQVDIGLIK | Yes               | 599.01                 | 658.4                 | 18.11                       | 78.3                      | 37.1                | 35523                           | ND                        | ND                        | No           |
| HPT                 | VVLHPNYSQVDIGLIK | Yes               | 599.01                 | 660.4                 | 18.11                       | 78.3                      | 28.1                | 17215                           | ND                        | ND                        | No           |
| HPT                 | VVLHPNYSQVDIGLIK | Yes               | 599.01                 | 757.5                 | 18.11                       | 78.3                      | 25.1                | 74634                           | ND                        | ND                        | No           |
| HPT                 | VVLHPNYSQVDIGLIK | Yes               | 599.01                 | 823.4                 | 18.11                       | 78.3                      | 25.1                | 25221                           | ND                        | ND                        | No           |
| HS90A               | DNSTMGYMAAK      | Yes               | 594.8                  | 230.1                 | 12.70                       | 100                       | 31.7                | ND                              | ND                        | ND                        | No           |
| HS90A               | DNSTMGYMAAK      | Yes               | 594.8                  | 640.3                 | 12.70                       | 100                       | 31.7                | ND                              | ND                        | ND                        | No           |
| HS90A               | DNSTMGYMAAK      | Yes               | 594.8                  | 771.4                 | 12.70                       | 100                       | 31.7                | ND                              | ND                        | ND                        | No           |
| HS90A               | DNSTMGYMAAK      | Yes               | 594.8                  | 872.4                 | 12.70                       | 100                       | 31.7                | ND                              | ND                        | ND                        | No           |
| HS90A               | HLEINPDHSIETLR   | Yes               | 596.3                  | 522.2                 | 17.40                       | 100                       | 30.9                | ND                              | 5206                      | ND                        | No           |
| HS90A               | HLEINPDHSIETLR   | Yes               | 596.3                  | 631.4                 | 17.40                       | 100                       | 30.9                | ND                              | ND                        | ND                        | No           |
| HS90A               | HLEINPDHSIETLR   | Yes               | 596.3                  | 819.4                 | 17.40                       | 100                       | 30.9                | ND                              | ND                        | ND                        | No           |

**Table S5.** MRM assay of individual proteins.

| Protein<br>(_HUMAN) | Peptide                             | MS/MS<br>spectrum | Precursor ion<br>(m/z) | Fragment ion<br>(m/z) | Retention time<br>(minutes) | Decustering<br>potential | Collision<br>energy | Area of<br>synthetic<br>peptide | Area in control<br>sample | Area in disease<br>sample | Interference |
|---------------------|-------------------------------------|-------------------|------------------------|-----------------------|-----------------------------|--------------------------|---------------------|---------------------------------|---------------------------|---------------------------|--------------|
| HS90A               | HLEINPDHSIIETLR                     | Yes               | 596.3                  | 831.5                 | 17.40                       | 100                      | 30.9                | ND                              | ND                        | ND                        | No           |
| HS90A               | HLEINPDHSIIETLR                     | Yes               | 894                    | 1180.6                | 17.40                       | 100                      | 44.8                | ND                              | ND                        | ND                        | No           |
| HS90A               | HLEINPDHSIIETLR                     | Yes               | 894                    | 831.5                 | 17.40                       | 100                      | 44.8                | ND                              | ND                        | ND                        | No           |
| HS90A               | HLEINPDHSIIETLR                     | Yes               | 894                    | 968.6                 | 17.40                       | 100                      | 44.8                | ND                              | ND                        | ND                        | No           |
| HS90A               | SLTNDWEDHLAVK                       | Yes               | 764.4                  | 664.3                 | 14.52                       | 100                      | 39.1                | ND                              | ND                        | ND                        | No           |
| HS90A               | SLTNDWEDHLAVK                       | Yes               | 764.4                  | 682.4                 | 14.52                       | 100                      | 45.1                | ND                              | ND                        | ND                        | No           |
| HS90A               | SLTNDWEDHLAVK                       | Yes               | 764.4                  | 811.4                 | 14.52                       | 100                      | 39.1                | ND                              | ND                        | ND                        | No           |
| HS90A               | SLTNDWEDHLAVK                       | Yes               | 764.4                  | 997.5                 | 14.52                       | 100                      | 39.1                | ND                              | ND                        | ND                        | No           |
| HS90A               | TLTIVDTGIGMTK                       | Yes               | 675.4                  | 1034.6                | 18.80                       | 100                      | 35.2                | ND                              | ND                        | ND                        | No           |
| HS90A               | TLTIVDTGIGMTK                       | Yes               | 675.4                  | 1135.6                | 18.80                       | 100                      | 35.2                | ND                              | ND                        | ND                        | No           |
| HS90A               | TLTIVDTGIGMTK                       | Yes               | 675.4                  | 822.4                 | 18.80                       | 100                      | 35.2                | ND                              | ND                        | ND                        | No           |
| HS90A               | TLTIVDTGIGMTK                       | Yes               | 675.4                  | 921.5                 | 18.80                       | 100                      | 35.2                | ND                              | ND                        | ND                        | No           |
| HS90B               | ADHGEPGR                            | Yes               | 476.24                 | 324.1                 | 5.85                        | 62.4                     | 26.5                | 24850                           | ND                        | ND                        | No           |
| HS90B               | ADHGEPGR                            | Yes               | 476.24                 | 442.3                 | 5.85                        | 62.4                     | 32.5                | 57462                           | ND                        | ND                        | No           |
| HS90B               | ADHGEPGR                            | Yes               | 476.24                 | 510.2                 | 5.85                        | 62.4                     | 23.5                | 7185                            | ND                        | ND                        | No           |
| HS90B               | ADHGEPGR                            | Yes               | 476.24                 | 628.3                 | 5.85                        | 62.4                     | 32.5                | 61511                           | ND                        | ND                        | No           |
| HS90B               | DLVVLLFETALLSSGFSLEDPQTHSNR         | No                |                        |                       |                             |                          |                     |                                 |                           |                           |              |
| HS90B               | IDIIPNPQER                          | Yes               | 597.83                 | 342.2                 | 14.13                       | 78.1                     | 28.8                | 418149                          | ND                        | ND                        | No           |
| HS90B               | IDIIPNPQER                          | Yes               | 597.83                 | 529.3                 | 14.13                       | 78.1                     | 37.8                | 53632                           | ND                        | ND                        | No           |
| HS90B               | IDIIPNPQER                          | Yes               | 597.83                 | 740.4                 | 14.13                       | 78.1                     | 28.8                | 360933                          | ND                        | ND                        | No           |
| HS90B               | IDIIPNPQER                          | Yes               | 597.83                 | 853.5                 | 14.13                       | 78.1                     | 37.8                | 22546                           | ND                        | ND                        | No           |
| HS90B               | LGLGIDEDEVA AEEPNA AVPEIPPLEGDEDASR | No                |                        |                       |                             |                          |                     |                                 |                           |                           |              |
| HS90B               | NPDDITQEEYGEFYK                     | Yes               | 924.4                  | 310.2                 | 14.90                       | 120.2                    | 49.2                | 16155                           | ND                        | ND                        | No           |

**Table S5.** MRM assay of individual proteins.

| Protein<br>(_HUMAN) | Peptide           | MS/MS<br>spectrum | Precursor ion<br>(m/z) | Fragment ion<br>(m/z) | Retention time<br>(minutes) | Declustering<br>potential | Collision<br>energy | Area of<br>synthetic<br>peptide | Area in control<br>sample | Area in disease<br>sample | Interference |
|---------------------|-------------------|-------------------|------------------------|-----------------------|-----------------------------|---------------------------|---------------------|---------------------------------|---------------------------|---------------------------|--------------|
| HS90B               | NPDDITQEEYGEFYK   | Yes               | 924.4                  | 442.2                 | 14.90                       | 120.2                     | 46.2                | 23643                           | ND                        | ND                        | No           |
| HS90B               | NPDDITQEEYGEFYK   | Yes               | 924.4                  | 555.2                 | 14.90                       | 120.2                     | 40.2                | 14334                           | ND                        | ND                        | No           |
| HS90B               | NPDDITQEEYGEFYK   | Yes               | 924.4                  | 643.3                 | 14.90                       | 120.2                     | 52.2                | 9715                            | ND                        | ND                        | No           |
| HSPB1               | AQLGGPEAAK        | Yes               | 471.26                 | 313.2                 | 7.89                        | 61.8                      | 20.2                | 851057                          | ND                        | ND                        | No           |
| HSPB1               | AQLGGPEAAK        | Yes               | 471.26                 | 427.2                 | 7.89                        | 61.8                      | 23.2                | 141244                          | ND                        | ND                        | No           |
| HSPB1               | AQLGGPEAAK        | Yes               | 471.26                 | 629.3                 | 7.89                        | 61.8                      | 23.2                | 1584458                         | ND                        | ND                        | No           |
| HSPB1               | AQLGGPEAAK        | Yes               | 471.26                 | 742.4                 | 7.89                        | 61.8                      | 23.2                | 2223895                         | ND                        | ND                        | No           |
| HSPB1               | DGVVEITGK         | Yes               | 459.25                 | 305.2                 | 11.35                       | 60.2                      | 31.7                | 1394788                         | ND                        | ND                        | No           |
| HSPB1               | DGVVEITGK         | Yes               | 459.25                 | 418.3                 | 11.35                       | 60.2                      | 31.7                | 626394                          | ND                        | ND                        | No           |
| HSPB1               | DGVVEITGK         | Yes               | 459.25                 | 547.3                 | 11.35                       | 60.2                      | 22.7                | 1350464                         | ND                        | ND                        | No           |
| HSPB1               | DGVVEITGK         | Yes               | 459.25                 | 646.4                 | 11.35                       | 60.2                      | 22.7                | 3456399                         | ND                        | ND                        | No           |
| HSPB1               | GPSWDPFR          | Yes               | 481.23                 | 419.2                 | 19.53                       | 63.1                      | 32.7                | 23035290                        | ND                        | ND                        | No           |
| HSPB1               | GPSWDPFR          | Yes               | 481.23                 | 534.3                 | 19.53                       | 63.1                      | 23.7                | 6742572                         | ND                        | ND                        | No           |
| HSPB1               | GPSWDPFR          | Yes               | 481.23                 | 720.3                 | 19.53                       | 63.1                      | 26.7                | 4111401                         | ND                        | ND                        | No           |
| HSPB1               | GPSWDPFR          | Yes               | 481.23                 | 807.4                 | 19.53                       | 63.1                      | 26.7                | 8859724                         | ND                        | ND                        | No           |
| HSPB1               | LATQSNEITIPVTFESR | Yes               | 953.5                  | 639.3                 | 19.20                       | 124                       | 50.5                | 9087                            | ND                        | ND                        | No           |
| HSPB1               | LATQSNEITIPVTFESR | Yes               | 953.5                  | 744.4                 | 19.20                       | 124                       | 41.5                | 5242                            | ND                        | ND                        | No           |
| HSPB1               | LATQSNEITIPVTFESR | Yes               | 953.5                  | 835.4                 | 19.20                       | 124                       | 44.5                | 77710                           | ND                        | ND                        | No           |
| HSPB1               | LATQSNEITIPVTFESR | Yes               | 953.5                  | 857.4                 | 19.20                       | 124                       | 50.5                | ND                              | ND                        | ND                        | No           |
| HSPB1               | LFDQAFGLPR        | Yes               | 582.31                 | 272.2                 | 20.10                       | 76.1                      | 28.1                | 628928                          | ND                        | ND                        | No           |
| HSPB1               | LFDQAFGLPR        | Yes               | 582.31                 | 442.3                 | 20.10                       | 76.1                      | 34.1                | 440470                          | ND                        | ND                        | No           |
| HSPB1               | LFDQAFGLPR        | Yes               | 582.31                 | 660.4                 | 20.10                       | 76.1                      | 37.1                | 354601                          | ND                        | ND                        | No           |
| HSPB1               | LFDQAFGLPR        | Yes               | 582.31                 | 903.5                 | 20.10                       | 76.1                      | 25.1                | 602661                          | ND                        | ND                        | No           |

**Table S5.** MRM assay of individual proteins.

| Protein<br>(_HUMAN) | Peptide                       | MS/MS<br>spectrum | Precursor ion<br>(m/z) | Fragment ion<br>(m/z) | Retention time<br>(minutes) | Declustering<br>potential | Collision<br>energy | Area of<br>synthetic<br>peptide | Area in control<br>sample | Area in disease<br>sample | Interference                           |
|---------------------|-------------------------------|-------------------|------------------------|-----------------------|-----------------------------|---------------------------|---------------------|---------------------------------|---------------------------|---------------------------|----------------------------------------|
| HSPB1               | QDEHGYISR                     | Yes               | 368.84                 | 262.2                 | 7.57                        | 48.6                      | 25.4                | 400624                          | ND                        | ND                        | No                                     |
| HSPB1               | QDEHGYISR                     | Yes               | 368.84                 | 538.3                 | 7.57                        | 48.6                      | 22.4                | 95424                           | ND                        | ND                        | No                                     |
| HSPB1               | QDEHGYISR                     | Yes               | 368.84                 | 595.3                 | 7.57                        | 48.6                      | 19.4                | 161121                          | ND                        | ND                        | No                                     |
| HSPB1               | QDEHGYISR                     | Yes               | 368.84                 | 730.3                 | 7.57                        | 48.6                      | 19.4                | 2964                            | ND                        | ND                        | No                                     |
| HSPB1               | QLSSGVSEIR                    | Yes               | 538.29                 | 504.3                 | 11.50                       | 70.4                      | 35.2                | 367364                          | ND                        | ND                        | No                                     |
| HSPB1               | QLSSGVSEIR                    | Yes               | 538.29                 | 660.4                 | 11.50                       | 70.4                      | 29.2                | 270601                          | ND                        | ND                        | No                                     |
| HSPB1               | QLSSGVSEIR                    | Yes               | 538.29                 | 747.4                 | 11.50                       | 70.4                      | 32.2                | 194070                          | ND                        | ND                        | No                                     |
| HSPB1               | QLSSGVSEIR                    | Yes               | 538.29                 | 834.4                 | 11.50                       | 70.4                      | 29.2                | 523539                          | ND                        | ND                        | No                                     |
| HSPB1               | VPFLLR                        | Yes               | 416.26                 | 288.2                 | 19.21                       | 54.7                      | 29.8                | 96172                           | ND                        | ND                        | No                                     |
| HSPB1               | VPFLLR                        | Yes               | 416.26                 | 488.3                 | 19.21                       | 54.7                      | 29.8                | 3827893                         | ND                        | ND                        | No                                     |
| HSPB1               | VPFLLR                        | Yes               | 416.26                 | 635.4                 | 19.21                       | 54.7                      | 29.8                | 4012191                         | ND                        | ND                        | No                                     |
| HSPB1               | VPFLLR                        | Yes               | 416.26                 | 732.4                 | 19.21                       | 54.7                      | 20.8                | 1358917                         | ND                        | ND                        | No                                     |
| HSPB1               | VSLDVNHFAPDELTVK              | Yes               | 595.31                 | 347.2                 | 18.53                       | 77.8                      | 36.9                | 134368                          | ND                        | ND                        | No                                     |
| HSPB1               | VSLDVNHFAPDELTVK              | Yes               | 595.31                 | 460.3                 | 18.53                       | 77.8                      | 36.9                | 60865                           | ND                        | ND                        | No                                     |
| HSPB1               | VSLDVNHFAPDELTVK              | Yes               | 595.31                 | 801.4                 | 18.53                       | 77.8                      | 27.9                | 157605                          | ND                        | ND                        | No                                     |
| HSPB1               | VSLDVNHFAPDELTVK              | Yes               | 595.31                 | 872.5                 | 18.53                       | 77.8                      | 30.9                | 130188                          | ND                        | ND                        | No                                     |
| HSPB1               | YTLPPGVDPTQVSSSLSPGTLTVEAPMPK | No                |                        |                       |                             |                           |                     |                                 |                           |                           |                                        |
| HTRA1               | LHRPPVIVLQR                   | Yes               | 443.28                 | 416.3                 | 11.57                       | 58.2                      | 23.2                | 52408                           | ND                        | ND                        | No                                     |
| HTRA1               | LHRPPVIVLQR                   | Yes               | 443.28                 | 515.3                 | 11.57                       | 58.2                      | 26.2                | 86522                           | ND                        | 7666                      | No                                     |
| HTRA1               | LHRPPVIVLQR                   | Yes               | 443.28                 | 628.4                 | 11.57                       | 58.2                      | 29.2                | 75304                           | ND                        | 1467                      | Yes (Based on<br>Transition<br>Ratios) |
| HTRA1               | LHRPPVIVLQR                   | Yes               | 443.28                 | 700.4                 | 11.57                       | 58.2                      | 29.2                | 25796                           | 5752                      | 6861                      | Yes (Based on<br>Transition            |

**Table S5.** MRM assay of individual proteins.

| Protein<br>(_HUMAN) | Peptide                          | MS/MS<br>spectrum | Precursor ion<br>(m/z) | Fragment ion<br>(m/z) | Retention time<br>(minutes) | Declustering<br>potential | Collision<br>energy | Area of<br>synthetic<br>peptide | Area in control<br>sample | Area in disease<br>sample | Interference<br><br>Ratios)        |
|---------------------|----------------------------------|-------------------|------------------------|-----------------------|-----------------------------|---------------------------|---------------------|---------------------------------|---------------------------|---------------------------|------------------------------------|
| HTRA1               | LPVLLLGR                         | Yes               | 440.8                  | 345.2                 | 19.04                       | 57.9                      | 27.9                | 71563                           | 1414                      | ND                        | No                                 |
| HTRA1               | LPVLLLGR                         | Yes               | 440.8                  | 571.4                 | 19.04                       | 57.9                      | 27.9                | 282890                          | 3857                      | 5462                      | No                                 |
| HTRA1               | LPVLLLGR                         | Yes               | 440.8                  | 670.5                 | 19.04                       | 57.9                      | 24.9                | ND                              | 5516                      | 11063                     | Yes (Based on<br>Manual<br>Review) |
| HTRA1               | LPVLLLGR                         | Yes               | 440.8                  | 767.5                 | 19.04                       | 57.9                      | 30.9                | 39379                           | ND                        | ND                        | No                                 |
| HTRA1               | SSELRPGEFVVAIGSPFSLQNTVTTGIVSTQR | No                |                        |                       |                             |                           |                     |                                 |                           |                           |                                    |
| HTRA1               | VTAGISFAIPSDK                    | Yes               | 653.36                 | 446.2                 | 16.54                       | 85.3                      | 37.2                | 1023574                         | ND                        | ND                        | No                                 |
| HTRA1               | VTAGISFAIPSDK                    | Yes               | 653.36                 | 630.3                 | 16.54                       | 85.3                      | 31.2                | 94417                           | ND                        | ND                        | No                                 |
| HTRA1               | VTAGISFAIPSDK                    | Yes               | 653.36                 | 777.4                 | 16.54                       | 85.3                      | 31.2                | 75984                           | ND                        | ND                        | No                                 |
| HTRA1               | VTAGISFAIPSDK                    | Yes               | 653.36                 | 864.4                 | 16.54                       | 85.3                      | 31.2                | 173460                          | ND                        | ND                        | No                                 |
| HTRA1               | YNFIADVVEK                       | Yes               | 599.31                 | 278.1                 | 18.07                       | 78.3                      | 25.9                | 640990                          | ND                        | ND                        | No                                 |
| HTRA1               | YNFIADVVEK                       | Yes               | 599.31                 | 660.4                 | 18.07                       | 78.3                      | 28.9                | 345816                          | ND                        | ND                        | No                                 |
| HTRA1               | YNFIADVVEK                       | Yes               | 599.31                 | 773.4                 | 18.07                       | 78.3                      | 28.9                | 186541                          | ND                        | ND                        | No                                 |
| HTRA1               | YNFIADVVEK                       | Yes               | 599.31                 | 920.5                 | 18.07                       | 78.3                      | 28.9                | 153701                          | ND                        | ND                        | No                                 |
| HXX1                | DFNPTATVK                        | No                |                        |                       |                             |                           |                     |                                 |                           |                           |                                    |
| HXX1                | FLLSESGSGK                       | Yes               | 512.77                 | 435.2                 | 12.19                       | 67.1                      | 34.1                | 485056                          | ND                        | ND                        | No                                 |
| HXX1                | FLLSESGSGK                       | Yes               | 512.77                 | 651.3                 | 12.19                       | 67.1                      | 25.1                | 811751                          | ND                        | ND                        | No                                 |
| HXX1                | FLLSESGSGK                       | Yes               | 512.77                 | 764.4                 | 12.19                       | 67.1                      | 25.1                | 1431663                         | ND                        | ND                        | No                                 |
| HXX1                | FLLSESGSGK                       | Yes               | 512.77                 | 877.5                 | 12.19                       | 67.1                      | 25.1                | 71555                           | ND                        | ND                        | No                                 |
| HXX1                | HIDLVEGDEGR                      | Yes               | 620.3                  | 251.2                 | 9.91                        | 81                        | 32.8                | 22343                           | ND                        | ND                        | No                                 |
| HXX1                | HIDLVEGDEGR                      | Yes               | 620.3                  | 361.2                 | 9.91                        | 81                        | 35.8                | 6728                            | ND                        | ND                        | No                                 |
| HXX1                | HIDLVEGDEGR                      | Yes               | 620.3                  | 874.4                 | 9.91                        | 81                        | 38.8                | 2808                            | ND                        | ND                        | No                                 |

**Table S5.** MRM assay of individual proteins.

| Protein<br>(_HUMAN) | Peptide                       | MS/MS<br>spectrum | Precursor ion<br>(m/z) | Fragment ion<br>(m/z) | Retention time<br>(minutes) | Declustering<br>potential | Collision<br>energy | Area of<br>synthetic<br>peptide | Area in control<br>sample | Area in disease<br>sample | Interference                       |
|---------------------|-------------------------------|-------------------|------------------------|-----------------------|-----------------------------|---------------------------|---------------------|---------------------------------|---------------------------|---------------------------|------------------------------------|
| HXX1                | HIDLVEGDEGR                   | Yes               | 620.3                  | 989.5                 | 9.91                        | 81                        | 38.8                | 5739                            | ND                        | ND                        | No                                 |
| HXX1                | LVDEYSLNAGK                   | Yes               | 604.81                 | 389.2                 | 11.43                       | 79                        | 38.1                | 419168                          | ND                        | ND                        | No                                 |
| HXX1                | LVDEYSLNAGK                   | Yes               | 604.81                 | 752.4                 | 11.43                       | 79                        | 29.1                | 335361                          | ND                        | ND                        | No                                 |
| HXX1                | LVDEYSLNAGK                   | Yes               | 604.81                 | 881.4                 | 11.43                       | 79                        | 29.1                | 116547                          | ND                        | ND                        | No                                 |
| HXX1                | LVDEYSLNAGK                   | Yes               | 604.81                 | 996.5                 | 11.43                       | 79                        | 29.1                | 643321                          | ND                        | ND                        | No                                 |
| HXX1                | SANLVAATLGAILNR               | Yes               | 742.43                 | 999.6                 | 24.68                       | 96.8                      | 35.2                | 40068                           | 7036                      | 7200                      | No                                 |
| HXX1                | SANLVAATLGAILNR               | Yes               | 742.43                 | 386.2                 | 24.68                       | 96.8                      | 35.2                | ND                              | ND                        | ND                        | Yes (Based on<br>Manual<br>Review) |
| HXX1                | SANLVAATLGAILNR               | Yes               | 742.43                 | 643.4                 | 24.68                       | 96.8                      | 32.2                | 52419                           | 12428                     | ND                        | No                                 |
| HXX1                | SANLVAATLGAILNR               | Yes               | 742.43                 | 928.6                 | 24.68                       | 96.8                      | 38.2                | 17977                           | ND                        | 7200                      | No                                 |
| HYAL2               | HPDWPPDR                      | No                |                        |                       |                             |                           |                     |                                 |                           |                           |                                    |
| HYAL2               | NDQLAWLWAESTALFPSVYLDETLASSR  | No                |                        |                       |                             |                           |                     |                                 |                           |                           |                                    |
| HYAL2               | QAAGGASEAWAGSHLTSLLALAALFTWTL | No                |                        |                       |                             |                           |                     |                                 |                           |                           |                                    |
| HYAL2               | TQESAGLAVIDWEDWRPVWVR         | Yes               | 838.42                 | 359.2                 | 24.54                       | 109.2                     | 37.3                | 3367                            | ND                        | ND                        | No                                 |
| HYAL2               | TQESAGLAVIDWEDWRPVWVR         | Yes               | 838.42                 | 687.3                 | 24.54                       | 109.2                     | 43.3                | 1445                            | ND                        | ND                        | No                                 |
| HYAL2               | TQESAGLAVIDWEDWRPVWVR         | Yes               | 838.42                 | 970.5                 | 24.54                       | 109.2                     | 37.3                | 1254                            | ND                        | ND                        | No                                 |
| HYAL2               | TQESAGLAVIDWEDWRPVWVR         | Yes               | 838.42                 | 998.6                 | 24.54                       | 109.2                     | 37.3                | 1489                            | ND                        | ND                        | No                                 |
| HYAL2               | VPLDLNAFDVQASPNEGfVNQNITIFYR  | No                |                        |                       |                             |                           |                     |                                 |                           |                           |                                    |
| HYOU1               | FFGDSAASMAIK                  | Yes               | 622.8                  | 295.1                 | 17.80                       | 100                       | 32.9                | ND                              | ND                        | ND                        | No                                 |
| HYOU1               | FFGDSAASMAIK                  | Yes               | 622.8                  | 691.4                 | 17.80                       | 100                       | 32.9                | ND                              | ND                        | ND                        | No                                 |
| HYOU1               | FFGDSAASMAIK                  | Yes               | 622.8                  | 778.4                 | 17.80                       | 100                       | 32.9                | ND                              | ND                        | ND                        | No                                 |
| HYOU1               | FFGDSAASMAIK                  | Yes               | 622.8                  | 950.5                 | 17.80                       | 100                       | 32.9                | ND                              | ND                        | ND                        | No                                 |
| HYOU1               | FPEHELTFDPQR                  | Yes               | 758.366                | 1005.5                | 12.96                       | 100                       | 38.9                | ND                              | 4664                      | 3388                      | No                                 |

**Table S5.** MRM assay of individual proteins.

| Protein<br>(_HUMAN) | Peptide             | MS/MS<br>spectrum | Precursor ion<br>(m/z) | Fragment ion<br>(m/z) | Retention time<br>(minutes) | Declustering<br>potential | Collision<br>energy | Area of<br>synthetic<br>peptide | Area in control<br>sample | Area in disease<br>sample | Interference |
|---------------------|---------------------|-------------------|------------------------|-----------------------|-----------------------------|---------------------------|---------------------|---------------------------------|---------------------------|---------------------------|--------------|
| HYOU1               | FPEHELTFDPQR        | Yes               | 758.366                | 1116.5                | 12.96                       | 100                       | 38.9                | ND                              | ND                        | ND                        | No           |
| HYOU1               | FPEHELTFDPQR        | Yes               | 758.366                | 400.231               | 12.96                       | 100                       | 44.9                | ND                              | 11727                     | 9505                      | No           |
| HYOU1               | FPEHELTFDPQR        | Yes               | 758.366                | 876.458               | 12.96                       | 100                       | 44.9                | ND                              | 31845                     | 41805                     | No           |
| HYOU1               | LAGLFNEQR           | Yes               | 524.3                  | 242.2                 | 15.40                       | 100                       | 28.6                | ND                              | ND                        | ND                        | No           |
| HYOU1               | LAGLFNEQR           | Yes               | 524.3                  | 546.3                 | 15.40                       | 100                       | 28.6                | ND                              | 6119                      | ND                        | No           |
| HYOU1               | LAGLFNEQR           | Yes               | 524.3                  | 693.3                 | 15.40                       | 100                       | 28.6                | ND                              | 12434                     | 9339                      | No           |
| HYOU1               | LAGLFNEQR           | Yes               | 524.3                  | 863.4                 | 15.40                       | 100                       | 28.6                | ND                              | 7844                      | 11404                     | No           |
| HYOU1               | LGNTISSLFGGGTTTPDAK | Yes               | 868.4                  | 1237.6                | 20.30                       | 100                       | 43.7                | ND                              | ND                        | ND                        | No           |
| HYOU1               | LGNTISSLFGGGTTTPDAK | Yes               | 868.4                  | 430.2                 | 20.30                       | 100                       | 43.7                | ND                              | ND                        | ND                        | No           |
| HYOU1               | LGNTISSLFGGGTTTPDAK | Yes               | 868.4                  | 803.4                 | 20.30                       | 100                       | 43.7                | ND                              | ND                        | ND                        | No           |
| HYOU1               | LGNTISSLFGGGTTTPDAK | Yes               | 868.4                  | 950.5                 | 20.30                       | 100                       | 43.7                | ND                              | ND                        | ND                        | No           |
| HYOU1               | LPATEKPVLLSK        | Yes               | 432.603                | 211.1                 | 10.74                       | 100                       | 22.6                | ND                              | 21741                     | 21799                     | No           |
| HYOU1               | LPATEKPVLLSK        | Yes               | 432.603                | 328.721               | 10.74                       | 100                       | 25.6                | ND                              | 20364                     | 26663                     | No           |
| HYOU1               | LPATEKPVLLSK        | Yes               | 432.603                | 543.332               | 10.74                       | 100                       | 25.6                | ND                              | 55273                     | 51963                     | No           |
| HYOU1               | LPATEKPVLLSK        | Yes               | 432.603                | 656.4                 | 10.74                       | 100                       | 22.6                | ND                              | 19753                     | 18732                     | No           |
| HYOU1               | LPATEKPVLLSK        | Yes               | 648.4                  | 1014.6                | 10.74                       | 100                       | 34                  | ND                              | ND                        | 2008                      | No           |
| HYOU1               | LPATEKPVLLSK        | Yes               | 648.4                  | 1085.7                | 10.74                       | 100                       | 34                  | ND                              | 1442                      | 1125                      | No           |
| HYOU1               | LPATEKPVLLSK        | Yes               | 648.4                  | 591.9                 | 10.74                       | 100                       | 34                  | ND                              | 24852                     | 24170                     | No           |
| HYOU1               | LPATEKPVLLSK        | Yes               | 648.4                  | 784.5                 | 10.74                       | 100                       | 34                  | ND                              | 5217                      | 3591                      | No           |
| HYOU1               | VAIVKPGVPMEIVLNK    | Yes               | 569.7                  | 472.3                 | 19.60                       | 100                       | 29.6                | ND                              | ND                        | ND                        | No           |
| HYOU1               | VAIVKPGVPMEIVLNK    | Yes               | 569.7                  | 715.4                 | 19.60                       | 100                       | 29.6                | ND                              | ND                        | ND                        | No           |
| HYOU1               | VAIVKPGVPMEIVLNK    | Yes               | 569.7                  | 764.5                 | 19.60                       | 100                       | 29.6                | ND                              | ND                        | ND                        | No           |
| HYOU1               | VAIVKPGVPMEIVLNK    | Yes               | 569.7                  | 943.5                 | 19.60                       | 100                       | 29.6                | ND                              | ND                        | ND                        | No           |



**Table S5.** MRM assay of individual proteins.

| Protein<br>(_HUMAN) | Peptide          | MS/MS<br>spectrum | Precursor ion<br>(m/z) | Fragment ion<br>(m/z) | Retention time<br>(minutes) | Declustering<br>potential | Collision<br>energy | Area of<br>synthetic<br>peptide | Area in control<br>sample | Area in disease<br>sample | Interference                           |
|---------------------|------------------|-------------------|------------------------|-----------------------|-----------------------------|---------------------------|---------------------|---------------------------------|---------------------------|---------------------------|----------------------------------------|
| HYOU1               | VAIVKPGVPMEIVLNK | Yes               | 854                    | 1196.7                | 19.60                       | 100                       | 43.1                | ND                              | ND                        | ND                        | No                                     |
| HYOU1               | VAIVKPGVPMEIVLNK | Yes               | 854                    | 284.2                 | 19.60                       | 100                       | 43.1                | ND                              | ND                        | ND                        | No                                     |
| HYOU1               | VAIVKPGVPMEIVLNK | Yes               | 854                    | 383.3                 | 19.60                       | 100                       | 43.1                | ND                              | ND                        | ND                        | No                                     |
| HYOU1               | VAIVKPGVPMEIVLNK | Yes               | 854                    | 943.5                 | 19.60                       | 100                       | 43.1                | ND                              | ND                        | ND                        | No                                     |
| IBP2                | AEVLFR           | Yes               | 367.71                 | 300.2                 | 12.35                       | 48.4                      | 18.7                | 36030                           | ND                        | 8094                      | No                                     |
| IBP2                | AEVLFR           | Yes               | 367.71                 | 435.3                 | 12.35                       | 48.4                      | 18.7                | 81964                           | 18545                     | 40338                     | Yes (Based on<br>Transition<br>Ratios) |
| IBP2                | AEVLFR           | Yes               | 367.71                 | 534.3                 | 12.35                       | 48.4                      | 18.7                | 180797                          | 10535                     | 34372                     | No                                     |
| IBP2                | AEVLFR           | Yes               | 367.71                 | 663.4                 | 12.35                       | 48.4                      | 18.7                | 10171                           | ND                        | 2060                      | No                                     |
| IBP2                | ELAVFR           | Yes               | 367.71                 | 322.2                 | 13.54                       | 48.4                      | 18.7                | 240327                          | 229090                    | 232464                    | No                                     |
| IBP2                | ELAVFR           | Yes               | 367.71                 | 421.3                 | 13.54                       | 48.4                      | 18.7                | 52641                           | 64258                     | 64032                     | No                                     |
| IBP2                | ELAVFR           | Yes               | 367.71                 | 492.3                 | 13.54                       | 48.4                      | 18.7                | 92548                           | 94822                     | 88956                     | No                                     |
| IBP2                | ELAVFR           | Yes               | 367.71                 | 605.4                 | 13.54                       | 48.4                      | 15.7                | 8547                            | 3100                      | 1819                      | Yes (Based on<br>Transition<br>Ratios) |
| IBP2                | HGLYNLK          | Yes               | 422.74                 | 537.3                 | 9.26                        | 55.5                      | 27.1                | 36579                           | 1552                      | ND                        | Yes (Based on<br>Transition<br>Ratios) |
| IBP2                | HGLYNLK          | Yes               | 422.74                 | 585.3                 | 9.26                        | 55.5                      | 24.1                | 222934                          | 82402                     | 49990                     | Yes (Based on<br>Transition<br>Ratios) |
| IBP2                | HGLYNLK          | Yes               | 422.74                 | 698.4                 | 9.26                        | 55.5                      | 24.1                | 60740                           | 54596                     | 28761                     | Yes (Based on<br>Transition<br>Ratios) |
| IBP2                | HGLYNLK          | Yes               | 422.74                 | 707.4                 | 9.26                        | 55.5                      | 21.1                | 106888                          | ND                        | ND                        | No                                     |

**Table S5.** MRM assay of individual proteins.

| Protein<br>(_HUMAN) | Peptide             | MS/MS<br>spectrum | Precursor ion<br>(m/z) | Fragment ion<br>(m/z) | Retention time<br>(minutes) | Declustering<br>potential | Collision<br>energy | Area of<br>synthetic<br>peptide | Area in control<br>sample | Area in disease<br>sample | Interference                           |
|---------------------|---------------------|-------------------|------------------------|-----------------------|-----------------------------|---------------------------|---------------------|---------------------------------|---------------------------|---------------------------|----------------------------------------|
| IBP2                | LIQGAPTIR           | Yes               | 484.8                  | 389.3                 | 10.85                       | 63.5                      | 32.8                | ND                              | ND                        | ND                        | Yes (Based on<br>Manual<br>Review)     |
| IBP2                | LIQGAPTIR           | Yes               | 484.8                  | 557.3                 | 10.85                       | 63.5                      | 23.8                | 18408                           | 19983                     | 14786                     | Yes (Based on<br>Transition<br>Ratios) |
| IBP2                | LIQGAPTIR           | Yes               | 484.8                  | 614.4                 | 10.85                       | 63.5                      | 23.8                | 136752                          | 27031                     | 34798                     | No                                     |
| IBP2                | LIQGAPTIR           | Yes               | 484.8                  | 742.4                 | 10.85                       | 63.5                      | 23.8                | 200739                          | 40944                     | 35262                     | No                                     |
| IBP2                | VTEQHR              | Yes               | 385.2                  | 312.2                 | 5.15                        | 50.7                      | 22.4                | 1845                            | ND                        | ND                        | No                                     |
| IBP2                | VTEQHR              | Yes               | 385.2                  | 440.2                 | 5.15                        | 50.7                      | 25.4                | 2993                            | ND                        | ND                        | No                                     |
| IBP2                | VTEQHR              | Yes               | 385.2                  | 569.3                 | 5.15                        | 50.7                      | 25.4                | 6944                            | ND                        | ND                        | No                                     |
| IBP2                | VTEQHR              | Yes               | 385.2                  | 670.3                 | 5.15                        | 50.7                      | 22.4                | 4980                            | ND                        | ND                        | No                                     |
| IBP3                | AYLLPAPPAPGNAESEEDR | Yes               | 1042.5                 | 348.2                 | 14.91                       | 135.5                     | 48.4                | 50974                           | ND                        | ND                        | No                                     |
| IBP3                | AYLLPAPPAPGNAESEEDR | Yes               | 1042.5                 | 461.3                 | 14.91                       | 135.5                     | 45.4                | 11402                           | ND                        | ND                        | No                                     |
| IBP3                | AYLLPAPPAPGNAESEEDR | Yes               | 1042.5                 | 558.3                 | 14.91                       | 135.5                     | 48.4                | 2882                            | ND                        | ND                        | No                                     |
| IBP3                | AYLLPAPPAPGNAESEEDR | Yes               | 1042.5                 | 629.4                 | 14.91                       | 135.5                     | 45.4                | 8711                            | ND                        | ND                        | No                                     |
| IBP3                | FHPLHSK             | Yes               | 433.24                 | 285.1                 | 6.14                        | 56.9                      | 24.6                | 495951                          | 786225                    | 692186                    | No                                     |
| IBP3                | FHPLHSK             | Yes               | 433.24                 | 371.2                 | 6.14                        | 56.9                      | 27.6                | 106771                          | 146682                    | 135383                    | No                                     |
| IBP3                | FHPLHSK             | Yes               | 433.24                 | 581.3                 | 6.14                        | 56.9                      | 21.6                | 362070                          | 628985                    | 637117                    | No                                     |
| IBP3                | FHPLHSK             | Yes               | 433.24                 | 632.3                 | 6.14                        | 56.9                      | 21.6                | 5694                            | 8284                      | 8298                      | No                                     |
| IBP3                | FLNVLSR             | Yes               | 473.28                 | 359.2                 | 16.13                       | 62.1                      | 23.3                | 125520                          | 1463013                   | 1493907                   | No                                     |
| IBP3                | FLNVLSR             | Yes               | 473.28                 | 571.4                 | 16.13                       | 62.1                      | 23.3                | 69335                           | 860695                    | 845768                    | No                                     |
| IBP3                | FLNVLSR             | Yes               | 473.28                 | 685.4                 | 16.13                       | 62.1                      | 23.3                | 215753                          | 2816423                   | 2864718                   | No                                     |
| IBP3                | FLNVLSR             | Yes               | 473.28                 | 798.5                 | 16.13                       | 62.1                      | 32.3                | 17114                           | 211946                    | 223165                    | No                                     |

**Table S5.** MRM assay of individual proteins.

| Protein<br>(_HUMAN) | Peptide          | MS/MS<br>spectrum | Precursor ion<br>(m/z) | Fragment ion<br>(m/z) | Retention time<br>(minutes) | Declustering<br>potential | Collision<br>energy | Area of<br>synthetic<br>peptide | Area in control<br>sample | Area in disease<br>sample | Interference |
|---------------------|------------------|-------------------|------------------------|-----------------------|-----------------------------|---------------------------|---------------------|---------------------------------|---------------------------|---------------------------|--------------|
| IBP3                | SAGSVESPSVSSTHR  | Yes               | 496.57                 | 587.3                 | 6.68                        | 65.1                      | 28.9                | 41821                           | 9736                      | 9127                      | No           |
| IBP3                | SAGSVESPSVSSTHR  | Yes               | 496.57                 | 773.4                 | 6.68                        | 65.1                      | 28.9                | 13089                           | 5706                      | 2783                      | No           |
| IBP3                | SAGSVESPSVSSTHR  | Yes               | 496.57                 | 870.4                 | 6.68                        | 65.1                      | 22.9                | 14425                           | 1291                      | 3536                      | No           |
| IBP3                | SAGSVESPSVSSTHR  | Yes               | 496.57                 | 957.5                 | 6.68                        | 65.1                      | 22.9                | 6281                            | 690                       | 967                       | No           |
| IBP3                | YGQPLPGYTTK      | Yes               | 612.82                 | 559.3                 | 10.71                       | 80.1                      | 29.5                | 46737                           | ND                        | ND                        | No           |
| IBP3                | YGQPLPGYTTK      | Yes               | 612.82                 | 569.3                 | 10.71                       | 80.1                      | 38.5                | 37702                           | ND                        | ND                        | No           |
| IBP3                | YGQPLPGYTTK      | Yes               | 612.82                 | 666.3                 | 10.71                       | 80.1                      | 35.5                | 269245                          | 12957                     | 15387                     | No           |
| IBP3                | YGQPLPGYTTK      | Yes               | 612.82                 | 779.4                 | 10.71                       | 80.1                      | 38.5                | 28847                           | ND                        | ND                        | No           |
| ICAM1               | ASVSVTAEDEGTQR   | Yes               | 725.34                 | 461.2                 | 8.04                        | 94.6                      | 31.4                | 6729                            | 6395                      | 4871                      | No           |
| ICAM1               | ASVSVTAEDEGTQR   | Yes               | 725.34                 | 705.3                 | 8.04                        | 94.6                      | 43.4                | 7368                            | 3373                      | 3383                      | No           |
| ICAM1               | ASVSVTAEDEGTQR   | Yes               | 725.34                 | 834.4                 | 8.04                        | 94.6                      | 34.4                | 13149                           | 4130                      | 3749                      | No           |
| ICAM1               | ASVSVTAEDEGTQR   | Yes               | 725.34                 | 905.4                 | 8.04                        | 94.6                      | 37.4                | 15718                           | 9377                      | 5632                      | No           |
| ICAM1               | DGTFPLPIGESVTVTR | Yes               | 844.95                 | 274.1                 | 19.24                       | 110                       | 39.7                | 71670                           | ND                        | ND                        | No           |
| ICAM1               | DGTFPLPIGESVTVTR | Yes               | 844.95                 | 421.2                 | 19.24                       | 110                       | 36.7                | 25208                           | ND                        | ND                        | No           |
| ICAM1               | DGTFPLPIGESVTVTR | Yes               | 844.95                 | 518.2                 | 19.24                       | 110                       | 42.7                | 15789                           | ND                        | ND                        | No           |
| ICAM1               | DGTFPLPIGESVTVTR | Yes               | 844.95                 | 631.3                 | 19.24                       | 110                       | 36.7                | 31289                           | ND                        | ND                        | No           |
| ICAM1               | LNPTVTYGNDSFSAK  | Yes               | 807.39                 | 305.2                 | 12.64                       | 105.2                     | 47                  | 27406                           | ND                        | ND                        | No           |
| ICAM1               | LNPTVTYGNDSFSAK  | Yes               | 807.39                 | 426.2                 | 12.64                       | 105.2                     | 35                  | 5718                            | ND                        | ND                        | No           |
| ICAM1               | LNPTVTYGNDSFSAK  | Yes               | 807.39                 | 525.3                 | 12.64                       | 105.2                     | 35                  | 13220                           | ND                        | ND                        | No           |
| ICAM1               | LNPTVTYGNDSFSAK  | Yes               | 807.39                 | 988.4                 | 12.64                       | 105.2                     | 38                  | 18083                           | ND                        | ND                        | No           |
| ICAM1               | TFLTVYWTPER      | Yes               | 471.58                 | 362.2                 | 20.79                       | 61.8                      | 24.6                | 1505                            | ND                        | ND                        | No           |
| ICAM1               | TFLTVYWTPER      | Yes               | 471.58                 | 401.2                 | 20.79                       | 61.8                      | 21.6                | 25316                           | ND                        | ND                        | No           |
| ICAM1               | TFLTVYWTPER      | Yes               | 471.58                 | 502.3                 | 20.79                       | 61.8                      | 21.6                | 10728                           | ND                        | ND                        | No           |

**Table S5.** MRM assay of individual proteins.

| Protein<br>(_HUMAN) | Peptide                 | MS/MS<br>spectrum | Precursor ion<br>(m/z) | Fragment ion<br>(m/z) | Retention time<br>(minutes) | Declustering<br>potential | Collision<br>energy | Area of<br>synthetic<br>peptide | Area in control<br>sample | Area in disease<br>sample | Interference |
|---------------------|-------------------------|-------------------|------------------------|-----------------------|-----------------------------|---------------------------|---------------------|---------------------------------|---------------------------|---------------------------|--------------|
| ICAM1               | TFLTVYWTPER             | Yes               | 471.58                 | 688.3                 | 20.79                       | 61.8                      | 21.6                | 4616                            | ND                        | ND                        | No           |
| ICAM1               | VELAPLPSWQPVGK          | Yes               | 760.93                 | 342.2                 | 18.83                       | 99.2                      | 36                  | 721731                          | ND                        | ND                        | No           |
| ICAM1               | VELAPLPSWQPVGK          | Yes               | 760.93                 | 400.3                 | 18.83                       | 99.2                      | 45                  | 299178                          | ND                        | ND                        | No           |
| ICAM1               | VELAPLPSWQPVGK          | Yes               | 760.93                 | 413.2                 | 18.83                       | 99.2                      | 33                  | 447767                          | ND                        | ND                        | No           |
| ICAM1               | VELAPLPSWQPVGK          | Yes               | 760.93                 | 898.5                 | 18.83                       | 99.2                      | 36                  | 205105                          | ND                        | ND                        | No           |
| ICAM3               | ADQEGAR                 | Yes               | 373.68                 | 303.2                 | 5.73                        | 49.2                      | 27.9                | 108216                          | ND                        | ND                        | No           |
| ICAM3               | ADQEGAR                 | Yes               | 373.68                 | 432.2                 | 5.73                        | 49.2                      | 21.9                | 106786                          | ND                        | ND                        | No           |
| ICAM3               | ADQEGAR                 | Yes               | 373.68                 | 560.3                 | 5.73                        | 49.2                      | 18.9                | 101171                          | ND                        | ND                        | No           |
| ICAM3               | ADQEGAR                 | Yes               | 373.68                 | 675.3                 | 5.73                        | 49.2                      | 21.9                | 19645                           | ND                        | ND                        | No           |
| ICAM3               | EESTYLPLTSMQPTEAMGEEPSR | Yes               | 861.72                 | 359.2                 | 19.59                       | 112.2                     | 50.5                | 52874                           | ND                        | ND                        | No           |
| ICAM3               | EESTYLPLTSMQPTEAMGEEPSR | Yes               | 861.72                 | 610.2                 | 19.59                       | 112.2                     | 47.5                | 12608                           | ND                        | ND                        | No           |
| ICAM3               | EESTYLPLTSMQPTEAMGEEPSR | Yes               | 861.72                 | 674.3                 | 19.59                       | 112.2                     | 50.5                | 37788                           | ND                        | ND                        | No           |
| ICAM3               | EESTYLPLTSMQPTEAMGEEPSR | Yes               | 861.72                 | 723.3                 | 19.59                       | 112.2                     | 47.5                | 13122                           | ND                        | ND                        | No           |
| ICAM3               | GNPYPELR                | Yes               | 473.24                 | 288.2                 | 12.41                       | 62                        | 32.3                | 1467218                         | ND                        | ND                        | No           |
| ICAM3               | GNPYPELR                | Yes               | 473.24                 | 514.3                 | 12.41                       | 62                        | 32.3                | 4781808                         | ND                        | ND                        | No           |
| ICAM3               | GNPYPELR                | Yes               | 473.24                 | 677.4                 | 12.41                       | 62                        | 26.3                | 697296                          | ND                        | ND                        | No           |
| ICAM3               | GNPYPELR                | Yes               | 473.24                 | 774.4                 | 12.41                       | 62                        | 23.3                | 2128386                         | ND                        | ND                        | No           |
| ICAM3               | IALETSLSK               | Yes               | 481.28                 | 535.3                 | 13.78                       | 63.1                      | 32.7                | 775665                          | ND                        | ND                        | No           |
| ICAM3               | IALETSLSK               | Yes               | 481.28                 | 664.4                 | 13.78                       | 63.1                      | 23.7                | 956656                          | ND                        | ND                        | No           |
| ICAM3               | IALETSLSK               | Yes               | 481.28                 | 777.4                 | 13.78                       | 63.1                      | 23.7                | 2532858                         | ND                        | ND                        | No           |
| ICAM3               | IALETSLSK               | Yes               | 481.28                 | 848.5                 | 13.78                       | 63.1                      | 23.7                | 1264298                         | ND                        | ND                        | No           |
| ICAM3               | QPAVEEPAEVTATVLSR       | No                |                        |                       |                             |                           |                     |                                 |                           |                           |              |
| ICAM3               | TELDMQPQGLGLFVNTSAPR    | No                |                        |                       |                             |                           |                     |                                 |                           |                           |              |

**Table S5.** MRM assay of individual proteins.

| Protein<br>(_HUMAN) | Peptide                        | MS/MS<br>spectrum | Precursor ion<br>(m/z) | Fragment ion<br>(m/z) | Retention time<br>(minutes) | Declustering<br>potential | Collision<br>energy | Area of<br>synthetic<br>peptide | Area in control<br>sample | Area in disease<br>sample | Interference |
|---------------------|--------------------------------|-------------------|------------------------|-----------------------|-----------------------------|---------------------------|---------------------|---------------------------------|---------------------------|---------------------------|--------------|
| ICAM3               | TFVLPVTPPR                     | Yes               | 563.83                 | 348.2                 | 18.56                       | 73.7                      | 27.3                | 5766033                         | 197276                    | 164252                    | No           |
| ICAM3               | TFVLPVTPPR                     | Yes               | 563.83                 | 666.4                 | 18.56                       | 73.7                      | 27.3                | 6265233                         | 212884                    | 160190                    | No           |
| ICAM3               | TFVLPVTPPR                     | Yes               | 563.83                 | 779.5                 | 18.56                       | 73.7                      | 27.3                | 1250287                         | 46024                     | 27547                     | No           |
| ICAM3               | TFVLPVTPPR                     | Yes               | 563.83                 | 878.5                 | 18.56                       | 73.7                      | 27.3                | 856345                          | 30444                     | 19967                     | No           |
| ICAM3               | VELAPLPPWQPVGQNFTLR            | No                |                        |                       |                             |                           |                     |                                 |                           |                           |              |
| ICAM3               | VQVTLDGVPAAAPGQPAQLQLNATESDDGR | No                |                        |                       |                             |                           |                     |                                 |                           |                           |              |
| IDHP                | ATDFVADR                       | Yes               | 447.72                 | 361.2                 | 8.80                        | 58.8                      | 31.2                | 16069                           | ND                        | ND                        | No           |
| IDHP                | ATDFVADR                       | Yes               | 447.72                 | 607.3                 | 8.80                        | 58.8                      | 25.2                | 18446                           | ND                        | ND                        | No           |
| IDHP                | ATDFVADR                       | Yes               | 447.72                 | 722.3                 | 8.80                        | 58.8                      | 22.2                | 19957                           | ND                        | ND                        | No           |
| IDHP                | ATDFVADR                       | Yes               | 447.72                 | 823.4                 | 8.80                        | 58.8                      | 22.2                | 2670                            | ND                        | ND                        | No           |
| IDHP                | DIFQEIFDK                      | Yes               | 577.79                 | 409.2                 | 23.80                       | 75.5                      | 33.9                | 78291                           | ND                        | ND                        | No           |
| IDHP                | DIFQEIFDK                      | Yes               | 577.79                 | 651.3                 | 23.80                       | 75.5                      | 27.9                | 56424                           | ND                        | ND                        | No           |
| IDHP                | DIFQEIFDK                      | Yes               | 577.79                 | 779.4                 | 23.80                       | 75.5                      | 27.9                | 70925                           | ND                        | ND                        | No           |
| IDHP                | DIFQEIFDK                      | Yes               | 577.79                 | 926.5                 | 23.80                       | 75.5                      | 24.9                | 142564                          | ND                        | ND                        | No           |
| IDHP                | IIWQFIK                        | Yes               | 474.29                 | 407.3                 | 20.38                       | 62.2                      | 32.4                | 69184                           | ND                        | ND                        | No           |
| IDHP                | IIWQFIK                        | Yes               | 474.29                 | 535.3                 | 20.38                       | 62.2                      | 26.4                | 19326                           | ND                        | ND                        | No           |
| IDHP                | IIWQFIK                        | Yes               | 474.29                 | 721.4                 | 20.38                       | 62.2                      | 20.4                | 186832                          | ND                        | ND                        | No           |
| IDHP                | IIWQFIK                        | Yes               | 474.29                 | 834.5                 | 20.38                       | 62.2                      | 23.4                | 43703                           | ND                        | ND                        | No           |
| IDHP                | LILPHVDIQLK                    | Yes               | 644.9                  | 616.4                 | 19.02                       | 84.2                      | 39.9                | 20564                           | ND                        | ND                        | No           |
| IDHP                | LILPHVDIQLK                    | Yes               | 644.9                  | 715.4                 | 19.02                       | 84.2                      | 39.9                | 30639                           | ND                        | ND                        | No           |
| IDHP                | LILPHVDIQLK                    | Yes               | 644.9                  | 852.5                 | 19.02                       | 84.2                      | 39.9                | 14591                           | ND                        | ND                        | No           |
| IDHP                | LILPHVDIQLK                    | Yes               | 644.9                  | 949.5                 | 19.02                       | 84.2                      | 30.9                | 35764                           | ND                        | ND                        | No           |
| IDHP                | YFDLGLPNR                      | Yes               | 547.79                 | 386.2                 | 17.29                       | 71.7                      | 23.6                | 104243                          | 7523                      | ND                        | No           |

**Table S5.** MRM assay of individual proteins.

| Protein<br>(_HUMAN) | Peptide           | MS/MS<br>spectrum | Precursor ion<br>(m/z) | Fragment ion<br>(m/z) | Retention time<br>(minutes) | Declustering<br>potential | Collision<br>energy | Area of<br>synthetic<br>peptide | Area in control<br>sample | Area in disease<br>sample | Interference |
|---------------------|-------------------|-------------------|------------------------|-----------------------|-----------------------------|---------------------------|---------------------|---------------------------------|---------------------------|---------------------------|--------------|
| IDHP                | YFDLGLPNR         | Yes               | 547.79                 | 426.2                 | 17.29                       | 71.7                      | 26.6                | 101387                          | 7140                      | ND                        | No           |
| IDHP                | YFDLGLPNR         | Yes               | 547.79                 | 669.4                 | 17.29                       | 71.7                      | 35.6                | 55234                           | 2292                      | 2439                      | No           |
| IDHP                | YFDLGLPNR         | Yes               | 547.79                 | 784.4                 | 17.29                       | 71.7                      | 26.6                | 101178                          | 3156                      | 8001                      | No           |
| IF4A1               | GIYAYGFEEKPSAIQQR | Yes               | 914.5                  | 1056.6                | 16.10                       | 100                       | 45.7                | ND                              | ND                        | ND                        | No           |
| IF4A1               | GIYAYGFEEKPSAIQQR | Yes               | 914.5                  | 799.4                 | 16.10                       | 100                       | 45.7                | ND                              | ND                        | ND                        | No           |
| IF4A1               | GIYAYGFEEKPSAIQQR | Yes               | 914.5                  | 927.5                 | 16.10                       | 100                       | 45.7                | ND                              | ND                        | ND                        | No           |
| IF4A1               | GYDVIAQAQSGTGK    | Yes               | 697.8                  | 648.3                 | 10.56                       | 100                       | 36.2                | ND                              | ND                        | ND                        | No           |
| IF4A1               | GYDVIAQAQSGTGK    | Yes               | 697.8                  | 776.4                 | 10.56                       | 100                       | 36.2                | ND                              | ND                        | ND                        | No           |
| IF4A1               | GYDVIAQAQSGTGK    | Yes               | 697.8                  | 847.4                 | 10.56                       | 100                       | 33.2                | ND                              | ND                        | ND                        | No           |
| IF4A1               | GYDVIAQAQSGTGK    | Yes               | 697.8                  | 960.5                 | 10.56                       | 100                       | 33.2                | ND                              | ND                        | ND                        | No           |
| IF4A1               | LQMEAPHIIVGTPGR   | Yes               | 540.3                  | 242.2                 | 17.00                       | 100                       | 28.1                | ND                              | 40371                     | 30464                     | No           |
| IF4A1               | LQMEAPHIIVGTPGR   | Yes               | 540.3                  | 487.3                 | 17.00                       | 100                       | 28.1                | ND                              | 24452                     | 28716                     | No           |
| IF4A1               | LQMEAPHIIVGTPGR   | Yes               | 540.3                  | 586.3                 | 17.00                       | 100                       | 28.1                | ND                              | 19872                     | 18717                     | No           |
| IF4A1               | LQMEAPHIIVGTPGR   | Yes               | 540.3                  | 699.4                 | 17.00                       | 100                       | 28.1                | ND                              | 44184                     | 38411                     | No           |
| IF4A1               | LQMEAPHIIVGTPGR   | Yes               | 809.9                  | 1046.6                | 17.00                       | 100                       | 41.1                | ND                              | ND                        | ND                        | No           |
| IF4A1               | LQMEAPHIIVGTPGR   | Yes               | 809.9                  | 1117.7                | 17.00                       | 100                       | 41.1                | ND                              | ND                        | ND                        | No           |
| IF4A1               | LQMEAPHIIVGTPGR   | Yes               | 809.9                  | 586.3                 | 17.00                       | 100                       | 41.1                | ND                              | ND                        | ND                        | No           |
| IF4A1               | LQMEAPHIIVGTPGR   | Yes               | 809.9                  | 699.4                 | 17.00                       | 100                       | 41.1                | ND                              | ND                        | ND                        | No           |
| IF4A1               | MFVLDEADEMLSR     | Yes               | 778.4                  | 1065.5                | 23.80                       | 100                       | 39.7                | ND                              | ND                        | ND                        | No           |
| IF4A1               | MFVLDEADEMLSR     | Yes               | 778.4                  | 1178.5                | 23.80                       | 100                       | 39.7                | ND                              | ND                        | ND                        | No           |
| IF4A1               | MFVLDEADEMLSR     | Yes               | 778.4                  | 378.2                 | 23.80                       | 100                       | 39.7                | ND                              | ND                        | ND                        | No           |
| IF4A1               | MFVLDEADEMLSR     | Yes               | 778.4                  | 821.4                 | 23.80                       | 100                       | 39.7                | ND                              | ND                        | ND                        | No           |
| IF4A1               | VFDMLNR           | Yes               | 447.7                  | 247.1                 | 16.00                       | 100                       | 25.2                | ND                              | ND                        | ND                        | No           |

**Table S5.** MRM assay of individual proteins.

| Protein<br>(_HUMAN) | Peptide     | MS/MS<br>spectrum | Precursor ion<br>(m/z) | Fragment ion<br>(m/z) | Retention time<br>(minutes) | Decustering<br>potential | Collision<br>energy | Area of<br>synthetic<br>peptide | Area in control<br>sample | Area in disease<br>sample | Interference |
|---------------------|-------------|-------------------|------------------------|-----------------------|-----------------------------|--------------------------|---------------------|---------------------------------|---------------------------|---------------------------|--------------|
| IF4A1               | VFDMLNR     | Yes               | 447.7                  | 533.3                 | 16.00                       | 100                      | 25.2                | ND                              | ND                        | ND                        | No           |
| IF4A1               | VFDMLNR     | Yes               | 447.7                  | 648.3                 | 16.00                       | 100                      | 25.2                | ND                              | ND                        | ND                        | No           |
| IF4A1               | VFDMLNR     | Yes               | 447.7                  | 795.4                 | 16.00                       | 100                      | 25.2                | ND                              | ND                        | ND                        | No           |
| IF4A1               | VLITDLLAR   | Yes               | 557.8                  | 213.2                 | 16.96                       | 100                      | 27                  | ND                              | ND                        | ND                        | No           |
| IF4A1               | VLITDLLAR   | Yes               | 557.8                  | 688.4                 | 16.96                       | 100                      | 30                  | ND                              | ND                        | ND                        | No           |
| IF4A1               | VLITDLLAR   | Yes               | 557.8                  | 789.4                 | 16.96                       | 100                      | 30                  | ND                              | ND                        | ND                        | No           |
| IF4A1               | VLITDLLAR   | Yes               | 557.8                  | 902.5                 | 16.96                       | 100                      | 30                  | ND                              | ND                        | ND                        | No           |
| IGF1                | EGTEASLQIR  | Yes               | 552.29                 | 416.3                 | 10.46                       | 72.2                     | 26.8                | 65483                           | ND                        | ND                        | No           |
| IGF1                | EGTEASLQIR  | Yes               | 552.29                 | 529.3                 | 10.46                       | 72.2                     | 29.8                | 51553                           | ND                        | ND                        | No           |
| IGF1                | EGTEASLQIR  | Yes               | 552.29                 | 616.4                 | 10.46                       | 72.2                     | 26.8                | 132844                          | ND                        | ND                        | No           |
| IGF1                | EGTEASLQIR  | Yes               | 552.29                 | 687.4                 | 10.46                       | 72.2                     | 35.8                | 102699                          | ND                        | ND                        | No           |
| IGF1                | ISSLPTQLFK  | Yes               | 567.33                 | 636.4                 | 17.77                       | 74.2                     | 36.5                | 71599                           | ND                        | ND                        | No           |
| IGF1                | ISSLPTQLFK  | Yes               | 567.33                 | 733.4                 | 17.77                       | 74.2                     | 27.5                | 649084                          | ND                        | ND                        | No           |
| IGF1                | ISSLPTQLFK  | Yes               | 567.33                 | 846.5                 | 17.77                       | 74.2                     | 27.5                | 50601                           | ND                        | ND                        | No           |
| IGF1                | ISSLPTQLFK  | Yes               | 567.33                 | 933.5                 | 17.77                       | 74.2                     | 27.5                | 163909                          | ND                        | ND                        | No           |
| IGF1                | THPGGEQK    | Yes               | 427.21                 | 275.2                 | 5.09                        | 56.1                     | 24.3                | 3888                            | ND                        | ND                        | No           |
| IGF1                | THPGGEQK    | Yes               | 427.21                 | 518.3                 | 5.09                        | 56.1                     | 27.3                | 3859                            | ND                        | ND                        | No           |
| IGF1                | THPGGEQK    | Yes               | 427.21                 | 579.3                 | 5.09                        | 56.1                     | 21.3                | 2110                            | ND                        | ND                        | No           |
| IGF1                | THPGGEQK    | Yes               | 427.21                 | 615.3                 | 5.09                        | 56.1                     | 21.3                | 70252                           | ND                        | ND                        | No           |
| IGF1                | YQPPSTNK    | No                |                        |                       |                             |                          |                     |                                 |                           |                           |              |
| IKIP                | LEPLVNDLTLR | Yes               | 641.87                 | 502.3                 | 19.11                       | 83.8                     | 39.7                | 33929                           | ND                        | ND                        | No           |
| IKIP                | LEPLVNDLTLR | Yes               | 641.87                 | 731.4                 | 19.11                       | 83.8                     | 39.7                | 66460                           | ND                        | ND                        | No           |
| IKIP                | LEPLVNDLTLR | Yes               | 641.87                 | 830.5                 | 19.11                       | 83.8                     | 36.7                | 81801                           | ND                        | ND                        | No           |

**Table S5.** MRM assay of individual proteins.

| Protein<br>(_HUMAN) | Peptide                  | MS/MS<br>spectrum | Precursor ion<br>(m/z) | Fragment ion<br>(m/z) | Retention time<br>(minutes) | Decustering<br>potential | Collision<br>energy | Area of<br>synthetic<br>peptide | Area in control<br>sample | Area in disease<br>sample | Interference |
|---------------------|--------------------------|-------------------|------------------------|-----------------------|-----------------------------|--------------------------|---------------------|---------------------------------|---------------------------|---------------------------|--------------|
| IKIP                | LEPLVNDLTLR              | Yes               | 641.87                 | 943.6                 | 19.11                       | 83.8                     | 39.7                | 20955                           | ND                        | ND                        | No           |
| IKIP                | LETNEFQQLQSK             | Yes               | 732.87                 | 475.3                 | 13.09                       | 95.5                     | 43.7                | 85426                           | ND                        | ND                        | No           |
| IKIP                | LETNEFQQLQSK             | Yes               | 732.87                 | 587.3                 | 13.09                       | 95.5                     | 34.7                | 31106                           | ND                        | ND                        | No           |
| IKIP                | LETNEFQQLQSK             | Yes               | 732.87                 | 603.3                 | 13.09                       | 95.5                     | 34.7                | 68366                           | ND                        | ND                        | No           |
| IKIP                | LETNEFQQLQSK             | Yes               | 732.87                 | 878.5                 | 13.09                       | 95.5                     | 34.7                | 60798                           | ND                        | ND                        | No           |
| IKIP                | NIGDLLSSSIDR             | Yes               | 430.56                 | 403.2                 | 18.29                       | 56.5                     | 19.5                | 12940                           | ND                        | ND                        | No           |
| IKIP                | NIGDLLSSSIDR             | Yes               | 430.56                 | 490.3                 | 18.29                       | 56.5                     | 28.5                | 25929                           | ND                        | ND                        | No           |
| IKIP                | NIGDLLSSSIDR             | Yes               | 430.56                 | 577.3                 | 18.29                       | 56.5                     | 16.5                | 18767                           | ND                        | ND                        | No           |
| IKIP                | NIGDLLSSSIDR             | Yes               | 430.56                 | 664.3                 | 18.29                       | 56.5                     | 19.5                | 26106                           | ND                        | ND                        | No           |
| IKIP                | SSGGGGWADPR              | Yes               | 523.74                 | 272.2                 | 8.88                        | 68.6                     | 34.5                | 134688                          | ND                        | ND                        | No           |
| IKIP                | SSGGGGWADPR              | Yes               | 523.74                 | 458.2                 | 8.88                        | 68.6                     | 25.5                | 9738                            | ND                        | ND                        | No           |
| IKIP                | SSGGGGWADPR              | Yes               | 523.74                 | 660.3                 | 8.88                        | 68.6                     | 25.5                | 2650                            | ND                        | ND                        | No           |
| IKIP                | SSGGGGWADPR              | Yes               | 523.74                 | 758.4                 | 8.88                        | 68.6                     | 25.5                | 4224                            | ND                        | ND                        | No           |
| IKIP                | TVTFANDLKPK              | Yes               | 617.35                 | 302.2                 | 11.83                       | 80.6                     | 32.7                | 111694                          | ND                        | ND                        | No           |
| IKIP                | TVTFANDLKPK              | Yes               | 617.35                 | 714.4                 | 11.83                       | 80.6                     | 38.7                | 21890                           | ND                        | ND                        | No           |
| IKIP                | TVTFANDLKPK              | Yes               | 617.35                 | 785.5                 | 11.83                       | 80.6                     | 32.7                | 90940                           | ND                        | ND                        | No           |
| IKIP                | TVTFANDLKPK              | Yes               | 617.35                 | 932.5                 | 11.83                       | 80.6                     | 29.7                | 22988                           | ND                        | ND                        | No           |
| IL18                | FIDNTLYFIAEDDENLES DYFGK | No                |                        |                       |                             |                          |                     |                                 |                           |                           |              |
| IL18                | SDIIFQQR                 | Yes               | 513.27                 | 450.2                 | 17.84                       | 67.2                     | 25.1                | 10191                           | ND                        | ND                        | No           |
| IL18                | SDIIFQQR                 | Yes               | 513.27                 | 597.3                 | 17.84                       | 67.2                     | 25.1                | 21196                           | ND                        | ND                        | No           |
| IL18                | SDIIFQQR                 | Yes               | 513.27                 | 710.4                 | 17.84                       | 67.2                     | 25.1                | 11432                           | ND                        | ND                        | No           |
| IL18                | SDIIFQQR                 | Yes               | 513.27                 | 823.5                 | 17.84                       | 67.2                     | 34.1                | 2324                            | ND                        | ND                        | No           |
| IL18                | SVPGHDNK                 | Yes               | 427.21                 | 261.2                 | 5.25                        | 56.1                     | 30.3                | 26278                           | ND                        | ND                        | No           |



**Table S5.** MRM assay of individual proteins.

| Protein<br>(_HUMAN) | Peptide           | MS/MS<br>spectrum | Precursor ion<br>(m/z) | Fragment ion<br>(m/z) | Retention time<br>(minutes) | Declustering<br>potential | Collision<br>energy | Area of<br>synthetic<br>peptide | Area in control<br>sample | Area in disease<br>sample | Interference |
|---------------------|-------------------|-------------------|------------------------|-----------------------|-----------------------------|---------------------------|---------------------|---------------------------------|---------------------------|---------------------------|--------------|
| IL18                | SVPGHDNK          | Yes               | 427.21                 | 513.2                 | 5.25                        | 56.1                      | 27.3                | 7998                            | ND                        | ND                        | No           |
| IL18                | SVPGHDNK          | Yes               | 427.21                 | 570.3                 | 5.25                        | 56.1                      | 30.3                | 14346                           | ND                        | ND                        | No           |
| IL18                | SVPGHDNK          | Yes               | 427.21                 | 667.3                 | 5.25                        | 56.1                      | 21.3                | 55214                           | ND                        | ND                        | No           |
| IL19                | DHQEPNPK          | Yes               | 482.73                 | 253.1                 | 5.32                        | 63.3                      | 26.7                | 240863                          | ND                        | ND                        | No           |
| IL19                | DHQEPNPK          | Yes               | 482.73                 | 455.3                 | 5.32                        | 63.3                      | 26.7                | 62495                           | ND                        | ND                        | No           |
| IL19                | DHQEPNPK          | Yes               | 482.73                 | 510.2                 | 5.32                        | 63.3                      | 29.7                | 57267                           | ND                        | ND                        | No           |
| IL19                | DHQEPNPK          | Yes               | 482.73                 | 712.4                 | 5.32                        | 63.3                      | 23.7                | 55067                           | ND                        | ND                        | No           |
| IL19                | NLLAFYVDR         | Yes               | 555.8                  | 341.2                 | 19.75                       | 72.7                      | 24                  | 50437                           | ND                        | ND                        | No           |
| IL19                | NLLAFYVDR         | Yes               | 555.8                  | 699.3                 | 19.75                       | 72.7                      | 27                  | 23856                           | ND                        | ND                        | No           |
| IL19                | NLLAFYVDR         | Yes               | 555.8                  | 770.4                 | 19.75                       | 72.7                      | 27                  | 55749                           | ND                        | ND                        | No           |
| IL19                | NLLAFYVDR         | Yes               | 555.8                  | 883.5                 | 19.75                       | 72.7                      | 27                  | 35675                           | ND                        | ND                        | No           |
| IL19                | QEATNATR          | No                |                        |                       |                             |                           |                     |                                 |                           |                           |              |
| IL19                | SLGELDVFLAWINK    | No                |                        |                       |                             |                           |                     |                                 |                           |                           |              |
| IL19                | VIHDNYDQLEVHAAAIK | Yes               | 646                    | 610.4                 | 12.76                       | 84.3                      | 33.5                | 28760                           | ND                        | ND                        | No           |
| IL19                | VIHDNYDQLEVHAAAIK | Yes               | 646                    | 709.4                 | 12.76                       | 84.3                      | 30.5                | 12364                           | ND                        | ND                        | No           |
| IL19                | VIHDNYDQLEVHAAAIK | Yes               | 646                    | 838.5                 | 12.76                       | 84.3                      | 30.5                | 17805                           | 3124                      | 3288                      | No           |
| IL19                | VIHDNYDQLEVHAAAIK | Yes               | 646                    | 985.4                 | 12.76                       | 84.3                      | 33.5                | 9482                            | 5436                      | 4135                      | No           |
| IL22                | EASLADNNTDVR      | Yes               | 652.81                 | 274.2                 | 7.93                        | 85.2                      | 40.2                | 48202                           | ND                        | ND                        | No           |
| IL22                | EASLADNNTDVR      | Yes               | 652.81                 | 718.3                 | 7.93                        | 85.2                      | 37.2                | 13462                           | ND                        | ND                        | No           |
| IL22                | EASLADNNTDVR      | Yes               | 652.81                 | 833.4                 | 7.93                        | 85.2                      | 31.2                | 28926                           | ND                        | ND                        | No           |
| IL22                | EASLADNNTDVR      | Yes               | 652.81                 | 904.4                 | 7.93                        | 85.2                      | 31.2                | 30259                           | ND                        | ND                        | No           |
| IL22                | QVLNFTLEEVLPQSDR  | No                |                        |                       |                             |                           |                     |                                 |                           |                           |              |
| IL22                | SNFQQPYITNR       | Yes               | 684.34                 | 349.2                 | 11.29                       | 89.3                      | 38.6                | 29835                           | ND                        | ND                        | No           |

**Table S5.** MRM assay of individual proteins.

| Protein<br>(_HUMAN) | Peptide                | MS/MS<br>spectrum | Precursor ion<br>(m/z) | Fragment ion<br>(m/z) | Retention time<br>(minutes) | Declustering<br>potential | Collision<br>energy | Area of<br>synthetic<br>peptide | Area in control<br>sample | Area in disease<br>sample | Interference                           |
|---------------------|------------------------|-------------------|------------------------|-----------------------|-----------------------------|---------------------------|---------------------|---------------------------------|---------------------------|---------------------------|----------------------------------------|
| IL22                | SNFQQPYITNR            | Yes               | 684.34                 | 390.2                 | 11.29                       | 89.3                      | 32.6                | 36713                           | ND                        | ND                        | No                                     |
| IL22                | SNFQQPYITNR            | Yes               | 684.34                 | 763.4                 | 11.29                       | 89.3                      | 32.6                | 78192                           | ND                        | ND                        | No                                     |
| IL22                | SNFQQPYITNR            | Yes               | 684.34                 | 891.5                 | 11.29                       | 89.3                      | 32.6                | 18713                           | ND                        | ND                        | No                                     |
| IL32                | EELTPQK                | Yes               | 422.72                 | 259.1                 | 6.47                        | 55.5                      | 21.1                | 53852                           | 9777                      | 4635                      | No                                     |
| IL32                | EELTPQK                | Yes               | 422.72                 | 275.2                 | 6.47                        | 55.5                      | 30.1                | 65749                           | 10979                     | ND                        | No                                     |
| IL32                | EELTPQK                | Yes               | 422.72                 | 586.4                 | 6.47                        | 55.5                      | 21.1                | 95079                           | 3864                      | ND                        | No                                     |
| IL32                | EELTPQK                | Yes               | 422.72                 | 715.4                 | 6.47                        | 55.5                      | 24.1                | 6986                            | 5575                      | ND                        | Yes (Based on<br>Transition<br>Ratios) |
| IL32                | EGYLETVAAYYEEQHPPLPLEK | No                |                        |                       |                             |                           |                     |                                 |                           |                           |                                        |
| IL32                | LQTWWHGVLA WVK         | Yes               | 541.97                 | 432.3                 | 24.08                       | 70.9                      | 31.2                | 6056                            | ND                        | ND                        | No                                     |
| IL32                | LQTWWHGVLA WVK         | Yes               | 541.97                 | 503.3                 | 24.08                       | 70.9                      | 31.2                | 4786                            | ND                        | ND                        | No                                     |
| IL32                | LQTWWHGVLA WVK         | Yes               | 541.97                 | 616.4                 | 24.08                       | 70.9                      | 28.2                | 5085                            | ND                        | ND                        | No                                     |
| IL32                | LQTWWHGVLA WVK         | Yes               | 541.97                 | 772.5                 | 24.08                       | 70.9                      | 28.2                | 8790                            | ND                        | ND                        | No                                     |
| IL32                | VVALVHAVQALWK          | Yes               | 478.63                 | 333.2                 | 22.60                       | 62.7                      | 31                  | 31150                           | ND                        | ND                        | No                                     |
| IL32                | VVALVHAVQALWK          | Yes               | 478.63                 | 744.4                 | 22.60                       | 62.7                      | 25                  | 6826                            | ND                        | ND                        | No                                     |
| IL32                | VVALVHAVQALWK          | Yes               | 478.63                 | 815.5                 | 22.60                       | 62.7                      | 25                  | 7354                            | ND                        | ND                        | No                                     |
| IL32                | VVALVHAVQALWK          | Yes               | 478.63                 | 952.5                 | 22.60                       | 62.7                      | 22                  | 4926                            | ND                        | ND                        | No                                     |
| IL7                 | SLEENK                 | Yes               | 360.18                 | 261.2                 | 5.56                        | 47.5                      | 24.3                | 319825                          | ND                        | ND                        | No                                     |
| IL7                 | SLEENK                 | Yes               | 360.18                 | 390.2                 | 5.56                        | 47.5                      | 15.3                | 74146                           | ND                        | ND                        | No                                     |
| IL7                 | SLEENK                 | Yes               | 360.18                 | 519.2                 | 5.56                        | 47.5                      | 15.3                | 784703                          | ND                        | ND                        | No                                     |
| IL7                 | SLEENK                 | Yes               | 360.18                 | 632.3                 | 5.56                        | 47.5                      | 18.3                | 40588                           | ND                        | ND                        | No                                     |
| IL8                 | ENWVQR                 | Yes               | 416.21                 | 303.2                 | 8.90                        | 54.7                      | 20.8                | 166904                          | 4966                      | 4072                      | No                                     |
| IL8                 | ENWVQR                 | Yes               | 416.21                 | 529.2                 | 8.90                        | 54.7                      | 17.8                | 3097                            | ND                        | ND                        | No                                     |

**Table S5.** MRM assay of individual proteins.

| Protein<br>(_HUMAN) | Peptide               | MS/MS<br>spectrum | Precursor ion<br>(m/z) | Fragment ion<br>(m/z) | Retention time<br>(minutes) | Declustering<br>potential | Collision<br>energy | Area of<br>synthetic<br>peptide | Area in control<br>sample | Area in disease<br>sample | Interference |
|---------------------|-----------------------|-------------------|------------------------|-----------------------|-----------------------------|---------------------------|---------------------|---------------------------------|---------------------------|---------------------------|--------------|
| IL8                 | ENWVQR                | Yes               | 416.21                 | 588.3                 | 8.90                        | 54.7                      | 20.8                | 32075                           | 3121                      | 1423                      | No           |
| IL8                 | ENWVQR                | Yes               | 416.21                 | 702.4                 | 8.90                        | 54.7                      | 20.8                | 3214                            | ND                        | ND                        | No           |
| IL8                 | TYSKPFHPK             | Yes               | 368.87                 | 265.1                 | 6.31                        | 48.6                      | 16.4                | 46204                           | ND                        | ND                        | No           |
| IL8                 | TYSKPFHPK             | Yes               | 368.87                 | 528.3                 | 6.31                        | 48.6                      | 19.4                | 5064                            | ND                        | ND                        | No           |
| IL8                 | TYSKPFHPK             | Yes               | 368.87                 | 625.3                 | 6.31                        | 48.6                      | 19.4                | 82744                           | ND                        | ND                        | No           |
| IL8                 | TYSKPFHPK             | Yes               | 368.87                 | 753.4                 | 6.31                        | 48.6                      | 22.4                | 2148                            | ND                        | ND                        | No           |
| ILEU                | EATTNAPFR             | Yes               | 503.75                 | 419.2                 | 8.65                        | 66                        | 21.7                | 128614                          | ND                        | ND                        | No           |
| ILEU                | EATTNAPFR             | Yes               | 503.75                 | 604.3                 | 8.65                        | 66                        | 24.7                | 74564                           | ND                        | ND                        | No           |
| ILEU                | EATTNAPFR             | Yes               | 503.75                 | 705.4                 | 8.65                        | 66                        | 24.7                | 32665                           | ND                        | ND                        | No           |
| ILEU                | EATTNAPFR             | Yes               | 503.75                 | 806.4                 | 8.65                        | 66                        | 33.7                | 31803                           | ND                        | ND                        | No           |
| ILEU                | LEESYTLNSDLAR         | Yes               | 755.87                 | 561.3                 | 13.61                       | 98.5                      | 35.8                | 25325                           | ND                        | ND                        | No           |
| ILEU                | LEESYTLNSDLAR         | Yes               | 755.87                 | 675.3                 | 13.61                       | 98.5                      | 35.8                | 52005                           | ND                        | ND                        | No           |
| ILEU                | LEESYTLNSDLAR         | Yes               | 755.87                 | 788.4                 | 13.61                       | 98.5                      | 32.8                | 29539                           | ND                        | ND                        | No           |
| ILEU                | LEESYTLNSDLAR         | Yes               | 755.87                 | 889.5                 | 13.61                       | 98.5                      | 41.8                | 58556                           | ND                        | ND                        | No           |
| ILEU                | LHEWTKPENLDFIEVNVSLPR | No                |                        |                       |                             |                           |                     |                                 |                           |                           |              |
| ILEU                | TFHFNTVEEVHSR         | Yes               | 534.93                 | 399.2                 | 11.99                       | 70                        | 33.8                | 96788                           | ND                        | ND                        | No           |
| ILEU                | TFHFNTVEEVHSR         | Yes               | 534.93                 | 627.3                 | 11.99                       | 70                        | 27.8                | 26312                           | ND                        | ND                        | No           |
| ILEU                | TFHFNTVEEVHSR         | Yes               | 534.93                 | 748.3                 | 11.99                       | 70                        | 33.8                | 8253                            | ND                        | ND                        | No           |
| ILEU                | TFHFNTVEEVHSR         | Yes               | 534.93                 | 756.4                 | 11.99                       | 70                        | 27.8                | 58624                           | ND                        | ND                        | No           |
| ILEU                | TYNFLPEFLVSTQK        | Yes               | 843.94                 | 379.2                 | 23.33                       | 109.9                     | 42.6                | 134293                          | ND                        | ND                        | No           |
| ILEU                | TYNFLPEFLVSTQK        | Yes               | 843.94                 | 463.3                 | 23.33                       | 109.9                     | 48.6                | 76077                           | ND                        | ND                        | No           |
| ILEU                | TYNFLPEFLVSTQK        | Yes               | 843.94                 | 526.2                 | 23.33                       | 109.9                     | 36.6                | 99652                           | ND                        | ND                        | No           |
| ILEU                | TYNFLPEFLVSTQK        | Yes               | 843.94                 | 639.3                 | 23.33                       | 109.9                     | 36.6                | 83064                           | ND                        | ND                        | No           |

**Table S5.** MRM assay of individual proteins.

| Protein<br>(_HUMAN) | Peptide         | MS/MS<br>spectrum | Precursor ion<br>(m/z) | Fragment ion<br>(m/z) | Retention time<br>(minutes) | Declustering<br>potential | Collision<br>energy | Area of<br>synthetic<br>peptide | Area in control<br>sample | Area in disease<br>sample | Interference                           |
|---------------------|-----------------|-------------------|------------------------|-----------------------|-----------------------------|---------------------------|---------------------|---------------------------------|---------------------------|---------------------------|----------------------------------------|
| ILK                 | GDDTPLHLAASHGHR | Yes               | 528.59                 | 369.2                 | 8.99                        | 69.2                      | 33.5                | 15851                           | ND                        | ND                        | No                                     |
| ILK                 | GDDTPLHLAASHGHR | Yes               | 528.59                 | 389.1                 | 8.99                        | 69.2                      | 24.5                | 16815                           | ND                        | ND                        | No                                     |
| ILK                 | GDDTPLHLAASHGHR | Yes               | 528.59                 | 593.3                 | 8.99                        | 69.2                      | 30.5                | 4816                            | ND                        | ND                        | No                                     |
| ILK                 | GDDTPLHLAASHGHR | Yes               | 528.59                 | 599.3                 | 8.99                        | 69.2                      | 30.5                | 2965                            | ND                        | ND                        | No                                     |
| ILK                 | HSGIDFK         | Yes               | 402.21                 | 294.2                 | 8.60                        | 52.9                      | 20.2                | 698457                          | ND                        | ND                        | No                                     |
| ILK                 | HSGIDFK         | Yes               | 402.21                 | 510.2                 | 8.60                        | 52.9                      | 20.2                | 424385                          | ND                        | ND                        | No                                     |
| ILK                 | HSGIDFK         | Yes               | 402.21                 | 579.3                 | 8.60                        | 52.9                      | 20.2                | 35714                           | ND                        | ND                        | No                                     |
| ILK                 | HSGIDFK         | Yes               | 402.21                 | 666.3                 | 8.60                        | 52.9                      | 20.2                | 66989                           | ND                        | ND                        | No                                     |
| ILK                 | LNENHSGELWK     | Yes               | 663.83                 | 333.2                 | 10.69                       | 86.6                      | 37.7                | 38474                           | ND                        | ND                        | No                                     |
| ILK                 | LNENHSGELWK     | Yes               | 663.83                 | 881.4                 | 10.69                       | 86.6                      | 40.7                | 6337                            | ND                        | ND                        | No                                     |
| ILK                 | LNENHSGELWK     | Yes               | 663.83                 | 970.5                 | 10.69                       | 86.6                      | 34.7                | 2527                            | ND                        | ND                        | No                                     |
| ILK                 | LNENHSGELWK     | Yes               | 663.83                 | 994.5                 | 10.69                       | 86.6                      | 34.7                | 5663                            | ND                        | ND                        | No                                     |
| ILK                 | QLNFLTK         | Yes               | 432.25                 | 361.2                 | 14.39                       | 56.8                      | 18.5                | 194665                          | ND                        | ND                        | No                                     |
| ILK                 | QLNFLTK         | Yes               | 432.25                 | 508.3                 | 14.39                       | 56.8                      | 21.5                | 87923                           | ND                        | ND                        | No                                     |
| ILK                 | QLNFLTK         | Yes               | 432.25                 | 622.4                 | 14.39                       | 56.8                      | 21.5                | 124449                          | ND                        | ND                        | No                                     |
| ILK                 | QLNFLTK         | Yes               | 432.25                 | 735.4                 | 14.39                       | 56.8                      | 21.5                | 22933                           | ND                        | ND                        | No                                     |
| ILK                 | WQGNDIVVK       | Yes               | 529.79                 | 315.1                 | 11.74                       | 69.3                      | 25.8                | 150356                          | ND                        | 7747                      | Yes (Based on<br>Transition<br>Ratios) |
| ILK                 | WQGNDIVVK       | Yes               | 529.79                 | 458.3                 | 11.74                       | 69.3                      | 31.8                | 16642                           | ND                        | 9488                      | Yes (Based on<br>Transition<br>Ratios) |
| ILK                 | WQGNDIVVK       | Yes               | 529.79                 | 744.4                 | 11.74                       | 69.3                      | 25.8                | 115132                          | ND                        | 7321                      | Yes (Based on<br>Transition<br>Ratios) |

**Table S5.** MRM assay of individual proteins.

| Protein<br>(_HUMAN) | Peptide            | MS/MS<br>spectrum | Precursor ion<br>(m/z) | Fragment ion<br>(m/z) | Retention time<br>(minutes) | Declustering<br>potential | Collision<br>energy | Area of<br>synthetic<br>peptide | Area in control<br>sample | Area in disease<br>sample | Interference                           |
|---------------------|--------------------|-------------------|------------------------|-----------------------|-----------------------------|---------------------------|---------------------|---------------------------------|---------------------------|---------------------------|----------------------------------------|
| ILK                 | WQGNDIVVK          | Yes               | 529.79                 | 872.5                 | 11.74                       | 69.3                      | 25.8                | 17728                           | ND                        | 12593                     | Yes (Based on<br>Transition<br>Ratios) |
| INHBA               | AEVWLFLK           | Yes               | 503.29                 | 407.3                 | 22.33                       | 65.9                      | 33.6                | 38492                           | ND                        | ND                        | No                                     |
| INHBA               | AEVWLFLK           | Yes               | 503.29                 | 706.4                 | 22.33                       | 65.9                      | 24.6                | 52506                           | ND                        | 2940                      | No                                     |
| INHBA               | AEVWLFLK           | Yes               | 503.29                 | 746.4                 | 22.33                       | 65.9                      | 21.6                | 3395                            | ND                        | ND                        | No                                     |
| INHBA               | AEVWLFLK           | Yes               | 503.29                 | 805.5                 | 22.33                       | 65.9                      | 24.6                | 84876                           | ND                        | ND                        | No                                     |
| INHBA               | EGSDLSVVER         | Yes               | 545.77                 | 304.2                 | 10.24                       | 71.4                      | 26.5                | 93615                           | 5400                      | 7015                      | No                                     |
| INHBA               | EGSDLSVVER         | Yes               | 545.77                 | 403.2                 | 10.24                       | 71.4                      | 26.5                | 147317                          | 11830                     | 8135                      | No                                     |
| INHBA               | EGSDLSVVER         | Yes               | 545.77                 | 702.4                 | 10.24                       | 71.4                      | 35.5                | 40694                           | 1240                      | 3294                      | No                                     |
| INHBA               | EGSDLSVVER         | Yes               | 545.77                 | 904.5                 | 10.24                       | 71.4                      | 29.5                | 9963                            | 1190                      | 911                       | No                                     |
| INHBA               | GHSPFANLK          | Yes               | 485.76                 | 282.1                 | 10.87                       | 63.7                      | 23.9                | 158066                          | ND                        | ND                        | No                                     |
| INHBA               | GHSPFANLK          | Yes               | 485.76                 | 445.3                 | 10.87                       | 63.7                      | 32.9                | 26907                           | ND                        | ND                        | No                                     |
| INHBA               | GHSPFANLK          | Yes               | 485.76                 | 689.4                 | 10.87                       | 63.7                      | 23.9                | 65911                           | ND                        | ND                        | No                                     |
| INHBA               | GHSPFANLK          | Yes               | 485.76                 | 776.4                 | 10.87                       | 63.7                      | 23.9                | 67364                           | ND                        | ND                        | No                                     |
| INHBA               | HPQGSLDTGEEAEEVGLK | Yes               | 632.64                 | 416.3                 | 11.80                       | 82.6                      | 35.8                | 9673                            | ND                        | ND                        | No                                     |
| INHBA               | HPQGSLDTGEEAEEVGLK | Yes               | 632.64                 | 735.3                 | 11.80                       | 82.6                      | 29.8                | 8734                            | ND                        | ND                        | No                                     |
| INHBA               | HPQGSLDTGEEAEEVGLK | Yes               | 632.64                 | 745.4                 | 11.80                       | 82.6                      | 29.8                | 18961                           | ND                        | ND                        | No                                     |
| INHBA               | HPQGSLDTGEEAEEVGLK | Yes               | 632.64                 | 874.5                 | 11.80                       | 82.6                      | 29.8                | 8328                            | ND                        | ND                        | No                                     |
| INHBA               | SELLLSEK           | Yes               | 459.76                 | 330.2                 | 12.20                       | 60.3                      | 22.7                | 161591                          | ND                        | ND                        | No                                     |
| INHBA               | SELLLSEK           | Yes               | 459.76                 | 363.2                 | 12.20                       | 60.3                      | 31.7                | 313350                          | ND                        | ND                        | No                                     |
| INHBA               | SELLLSEK           | Yes               | 459.76                 | 589.4                 | 12.20                       | 60.3                      | 22.7                | 203305                          | ND                        | ND                        | No                                     |
| INHBA               | SELLLSEK           | Yes               | 459.76                 | 702.4                 | 12.20                       | 60.3                      | 22.7                | 283090                          | ND                        | ND                        | No                                     |
| ISLR                | ALPGTPVASSQPR      | Yes               | 640.85                 | 440.3                 | 9.47                        | 83.7                      | 27.7                | 22301                           | 12350                     | 10861                     | No                                     |

**Table S5.** MRM assay of individual proteins.

| Protein<br>(_HUMAN) | Peptide                     | MS/MS<br>spectrum | Precursor ion<br>(m/z) | Fragment ion<br>(m/z) | Retention time<br>(minutes) | Decustering<br>potential | Collision<br>energy | Area of<br>synthetic<br>peptide | Area in control<br>sample | Area in disease<br>sample | Interference                       |
|---------------------|-----------------------------|-------------------|------------------------|-----------------------|-----------------------------|--------------------------|---------------------|---------------------------------|---------------------------|---------------------------|------------------------------------|
| ISLR                | ALPGTPVASSQPR               | Yes               | 640.85                 | 574.3                 | 9.47                        | 83.7                     | 39.7                | ND                              | 9576                      | 14346                     | Yes (Based on<br>Manual<br>Review) |
| ISLR                | ALPGTPVASSQPR               | Yes               | 640.85                 | 841.5                 | 9.47                        | 83.7                     | 33.7                | 52305                           | 41276                     | 25572                     | No                                 |
| ISLR                | ALPGTPVASSQPR               | Yes               | 640.85                 | 999.5                 | 9.47                        | 83.7                     | 39.7                | 5655                            | 5632                      | 3394                      | No                                 |
| ISLR                | EVPLLQSLWLAHNEIR            | Yes               | 640.02                 | 531.3                 | 24.17                       | 83.6                     | 33.2                | 6290                            | ND                        | ND                        | No                                 |
| ISLR                | EVPLLQSLWLAHNEIR            | Yes               | 640.02                 | 668.3                 | 24.17                       | 83.6                     | 36.2                | ND                              | 9659                      | 7219                      | Yes (Based on<br>Manual<br>Review) |
| ISLR                | EVPLLQSLWLAHNEIR            | Yes               | 640.02                 | 739.4                 | 24.17                       | 83.6                     | 39.2                | 14933                           | 18937                     | 14255                     | No                                 |
| ISLR                | EVPLLQSLWLAHNEIR            | Yes               | 640.02                 | 852.5                 | 24.17                       | 83.6                     | 36.2                | 10871                           | 10689                     | 13863                     | No                                 |
| ISLR                | LPGLPEGAFR                  | Yes               | 528.8                  | 268.2                 | 16.32                       | 69.2                     | 28.8                | 128034                          | ND                        | ND                        | No                                 |
| ISLR                | LPGLPEGAFR                  | Yes               | 528.8                  | 381.3                 | 16.32                       | 69.2                     | 25.8                | 63086                           | ND                        | ND                        | No                                 |
| ISLR                | LPGLPEGAFR                  | Yes               | 528.8                  | 676.3                 | 16.32                       | 69.2                     | 28.8                | 133401                          | ND                        | ND                        | No                                 |
| ISLR                | LPGLPEGAFR                  | Yes               | 528.8                  | 846.4                 | 16.32                       | 69.2                     | 34.8                | 25708                           | ND                        | ND                        | No                                 |
| ISLR                | SLDLSHNLISDFAWSDLHNLSALQLLK | No                |                        |                       |                             |                          |                     |                                 |                           |                           |                                    |
| ISLR                | TVAAGALASLSHLK              | Yes               | 446.93                 | 343.2                 | 16.74                       | 58.7                     | 17.3                | ND                              | ND                        | ND                        | No                                 |
| ISLR                | TVAAGALASLSHLK              | Yes               | 446.93                 | 684.4                 | 16.74                       | 58.7                     | 23.3                | 35935                           | 24016                     | ND                        | No                                 |
| ISLR                | TVAAGALASLSHLK              | Yes               | 446.93                 | 755.4                 | 16.74                       | 58.7                     | 23.3                | 32109                           | 15086                     | ND                        | No                                 |
| ISLR                | TVAAGALASLSHLK              | Yes               | 446.93                 | 868.5                 | 16.74                       | 58.7                     | 29.3                | 4735                            | ND                        | ND                        | No                                 |
| ITA5                | DLDGNGYPDLIVGSFGVDK         | Yes               | 990.98                 | 709.4                 | 21.27                       | 128.8                    | 46.1                | 8351                            | ND                        | ND                        | No                                 |
| ITA5                | DLDGNGYPDLIVGSFGVDK         | Yes               | 990.98                 | 735.3                 | 21.27                       | 128.8                    | 43.1                | 7567                            | ND                        | ND                        | No                                 |
| ITA5                | DLDGNGYPDLIVGSFGVDK         | Yes               | 990.98                 | 808.4                 | 21.27                       | 128.8                    | 55.1                | 8448                            | ND                        | ND                        | No                                 |
| ITA5                | DLDGNGYPDLIVGSFGVDK         | Yes               | 990.98                 | 921.5                 | 21.27                       | 128.8                    | 46.1                | 2014                            | ND                        | ND                        | No                                 |

**Table S5.** MRM assay of individual proteins.

| Protein<br>(_HUMAN) | Peptide            | MS/MS<br>spectrum | Precursor ion<br>(m/z) | Fragment ion<br>(m/z) | Retention time<br>(minutes) | Decustering<br>potential | Collision<br>energy | Area of<br>synthetic<br>peptide | Area in control<br>sample | Area in disease<br>sample | Interference |
|---------------------|--------------------|-------------------|------------------------|-----------------------|-----------------------------|--------------------------|---------------------|---------------------------------|---------------------------|---------------------------|--------------|
| ITA5                | LLESSLSSSEGEETVEYK | Yes               | 991.98                 | 310.2                 | 13.41                       | 129                      | 43.1                | 24259                           | ND                        | ND                        | No           |
| ITA5                | LLESSLSSSEGEETVEYK | Yes               | 991.98                 | 635.3                 | 13.41                       | 129                      | 49.1                | 26647                           | ND                        | ND                        | No           |
| ITA5                | LLESSLSSSEGEETVEYK | Yes               | 991.98                 | 764.4                 | 13.41                       | 129                      | 46.1                | 7011                            | ND                        | ND                        | No           |
| ITA5                | LLESSLSSSEGEETVEYK | Yes               | 991.98                 | 950.4                 | 13.41                       | 129                      | 46.1                | 9191                            | ND                        | ND                        | No           |
| ITA5                | SLQWFGATVR         | Yes               | 582.81                 | 503.3                 | 18.49                       | 76.2                     | 28.1                | 168786                          | ND                        | ND                        | No           |
| ITA5                | SLQWFGATVR         | Yes               | 582.81                 | 650.4                 | 18.49                       | 76.2                     | 31.1                | 134563                          | ND                        | ND                        | No           |
| ITA5                | SLQWFGATVR         | Yes               | 582.81                 | 836.4                 | 18.49                       | 76.2                     | 25.1                | 132308                          | ND                        | ND                        | No           |
| ITA5                | SLQWFGATVR         | Yes               | 582.81                 | 964.5                 | 18.49                       | 76.2                     | 28.1                | 30271                           | ND                        | ND                        | No           |
| ITA5                | SSASSGPQILK        | Yes               | 537.79                 | 655.4                 | 9.86                        | 70.4                     | 26.2                | 82326                           | ND                        | ND                        | No           |
| ITA5                | SSASSGPQILK        | Yes               | 537.79                 | 742.4                 | 9.86                        | 70.4                     | 26.2                | 100723                          | ND                        | ND                        | No           |
| ITA5                | SSASSGPQILK        | Yes               | 537.79                 | 829.5                 | 9.86                        | 70.4                     | 26.2                | 121745                          | ND                        | ND                        | No           |
| ITA5                | SSASSGPQILK        | Yes               | 537.79                 | 900.5                 | 9.86                        | 70.4                     | 26.2                | 54813                           | ND                        | ND                        | No           |
| ITA5                | VTAPPEAEYSGLR      | Yes               | 744.89                 | 595.3                 | 13.70                       | 97.1                     | 35.3                | 8818                            | ND                        | ND                        | No           |
| ITA5                | VTAPPEAEYSGLR      | Yes               | 744.89                 | 694.4                 | 13.70                       | 97.1                     | 44.3                | 40720                           | ND                        | ND                        | No           |
| ITA5                | VTAPPEAEYSGLR      | Yes               | 744.89                 | 823.4                 | 13.70                       | 97.1                     | 44.3                | 27125                           | ND                        | ND                        | No           |
| ITA5                | VTAPPEAEYSGLR      | Yes               | 744.89                 | 894.5                 | 13.70                       | 97.1                     | 44.3                | 44354                           | ND                        | ND                        | No           |
| ITAM                | LFTALFPFEK         | Yes               | 606.84                 | 520.3                 | 23.93                       | 79.3                     | 38.2                | 1249540                         | ND                        | ND                        | No           |
| ITAM                | LFTALFPFEK         | Yes               | 606.84                 | 667.3                 | 23.93                       | 79.3                     | 26.2                | 426000                          | ND                        | ND                        | No           |
| ITAM                | LFTALFPFEK         | Yes               | 606.84                 | 780.4                 | 23.93                       | 79.3                     | 29.2                | 392187                          | ND                        | ND                        | No           |
| ITAM                | LFTALFPFEK         | Yes               | 606.84                 | 952.5                 | 23.93                       | 79.3                     | 29.2                | 670268                          | ND                        | ND                        | No           |
| ITAM                | SLPISLVFLVPVR      | Yes               | 720.45                 | 371.2                 | 24.67                       | 93.9                     | 31.2                | 26267                           | ND                        | ND                        | No           |
| ITAM                | SLPISLVFLVPVR      | Yes               | 720.45                 | 470.3                 | 24.67                       | 93.9                     | 31.2                | 15641                           | ND                        | ND                        | No           |
| ITAM                | SLPISLVFLVPVR      | Yes               | 720.45                 | 829.5                 | 24.67                       | 93.9                     | 34.2                | 12632                           | ND                        | ND                        | No           |

**Table S5.** MRM assay of individual proteins.

| Protein<br>(_HUMAN) | Peptide             | MS/MS<br>spectrum | Precursor ion<br>(m/z) | Fragment ion<br>(m/z) | Retention time<br>(minutes) | Declustering<br>potential | Collision<br>energy | Area of<br>synthetic<br>peptide | Area in control<br>sample | Area in disease<br>sample | Interference |
|---------------------|---------------------|-------------------|------------------------|-----------------------|-----------------------------|---------------------------|---------------------|---------------------------------|---------------------------|---------------------------|--------------|
| ITAM                | SLPISLVFLVPVR       | Yes               | 720.45                 | 942.6                 | 24.67                       | 93.9                      | 31.2                | 3587                            | ND                        | ND                        | No           |
| ITAM                | SLVKPITQLLGR        | Yes               | 662.92                 | 300.2                 | 17.98                       | 86.5                      | 34.7                | 23343                           | ND                        | ND                        | No           |
| ITAM                | SLVKPITQLLGR        | Yes               | 662.92                 | 687.4                 | 17.98                       | 86.5                      | 40.7                | 6935                            | ND                        | ND                        | No           |
| ITAM                | SLVKPITQLLGR        | Yes               | 662.92                 | 800.5                 | 17.98                       | 86.5                      | 40.7                | 6175                            | ND                        | ND                        | No           |
| ITAM                | SLVKPITQLLGR        | Yes               | 662.92                 | 897.6                 | 17.98                       | 86.5                      | 34.7                | 60157                           | ND                        | ND                        | No           |
| ITAM                | VQSLVLGAPR          | Yes               | 520.32                 | 400.2                 | 12.69                       | 68.1                      | 25.4                | 70475                           | ND                        | ND                        | No           |
| ITAM                | VQSLVLGAPR          | Yes               | 520.32                 | 428.3                 | 12.69                       | 68.1                      | 25.4                | 32132                           | ND                        | ND                        | No           |
| ITAM                | VQSLVLGAPR          | Yes               | 520.32                 | 612.4                 | 12.69                       | 68.1                      | 34.4                | 30547                           | ND                        | ND                        | No           |
| ITAM                | VQSLVLGAPR          | Yes               | 520.32                 | 812.5                 | 12.69                       | 68.1                      | 25.4                | 78077                           | ND                        | ND                        | No           |
| ITAM                | YVIGVGDAFR          | Yes               | 548.79                 | 263.1                 | 16.38                       | 71.8                      | 23.6                | 245291                          | ND                        | ND                        | No           |
| ITAM                | YVIGVGDAFR          | Yes               | 548.79                 | 664.3                 | 16.38                       | 71.8                      | 23.6                | 21630                           | ND                        | ND                        | No           |
| ITAM                | YVIGVGDAFR          | Yes               | 548.79                 | 721.4                 | 16.38                       | 71.8                      | 26.6                | 113474                          | ND                        | ND                        | No           |
| ITAM                | YVIGVGDAFR          | Yes               | 548.79                 | 834.4                 | 16.38                       | 71.8                      | 26.6                | 115677                          | ND                        | ND                        | No           |
| K0090               | ALVQTEDHLLLFLQQLAGK | Yes               | 713.07                 | 516.3                 | 24.63                       | 93                        | 39.9                | 9930                            | ND                        | ND                        | No           |
| K0090               | ALVQTEDHLLLFLQQLAGK | Yes               | 713.07                 | 644.4                 | 24.63                       | 93                        | 30.9                | 16897                           | ND                        | ND                        | No           |
| K0090               | ALVQTEDHLLLFLQQLAGK | Yes               | 713.07                 | 894.4                 | 24.63                       | 93                        | 33.9                | 3722                            | ND                        | ND                        | No           |
| K0090               | ALVQTEDHLLLFLQQLAGK | Yes               | 713.07                 | 904.5                 | 24.63                       | 93                        | 30.9                | 13159                           | ND                        | ND                        | No           |
| K0090               | FNVEDGEIVQQVR       | Yes               | 766.89                 | 262.1                 | 14.70                       | 99.9                      | 42.2                | 13880                           | ND                        | ND                        | No           |
| K0090               | FNVEDGEIVQQVR       | Yes               | 766.89                 | 530.3                 | 14.70                       | 99.9                      | 33.2                | 4706                            | ND                        | ND                        | No           |
| K0090               | FNVEDGEIVQQVR       | Yes               | 766.89                 | 629.4                 | 14.70                       | 99.9                      | 33.2                | 2069                            | ND                        | ND                        | No           |
| K0090               | FNVEDGEIVQQVR       | Yes               | 766.89                 | 742.5                 | 14.70                       | 99.9                      | 45.2                | 1892                            | ND                        | ND                        | No           |
| K0090               | HLLIGLPSGAILSLPK    | Yes               | 543.68                 | 251.2                 | 22.36                       | 71.1                      | 34.3                | 136112                          | ND                        | ND                        | No           |
| K0090               | HLLIGLPSGAILSLPK    | Yes               | 543.68                 | 647.4                 | 22.36                       | 71.1                      | 22.3                | 175329                          | ND                        | ND                        | No           |



**Table S5.** MRM assay of individual proteins.

| Protein<br>(_HUMAN) | Peptide             | MS/MS<br>spectrum | Precursor ion<br>(m/z) | Fragment ion<br>(m/z) | Retention time<br>(minutes) | Decustering<br>potential | Collision<br>energy | Area of<br>synthetic<br>peptide | Area in control<br>sample | Area in disease<br>sample | Interference |
|---------------------|---------------------|-------------------|------------------------|-----------------------|-----------------------------|--------------------------|---------------------|---------------------------------|---------------------------|---------------------------|--------------|
| K0090               | HLLIGLPSGAILS LSPK  | Yes               | 543.68                 | 798.5                 | 22.36                       | 71.1                     | 22.3                | 36313                           | ND                        | ND                        | No           |
| K0090               | HLLIGLPSGAILS LSPK  | Yes               | 543.68                 | 885.5                 | 22.36                       | 71.1                     | 25.3                | 34664                           | ND                        | ND                        | No           |
| K0090               | LFGIESSSGTILWK      | Yes               | 769.42                 | 318.2                 | 21.94                       | 100.3                    | 36.4                | 17680                           | ND                        | ND                        | No           |
| K0090               | LFGIESSSGTILWK      | Yes               | 769.42                 | 446.3                 | 21.94                       | 100.3                    | 45.4                | 7423                            | ND                        | ND                        | No           |
| K0090               | LFGIESSSGTILWK      | Yes               | 769.42                 | 804.5                 | 21.94                       | 100.3                    | 36.4                | 3868                            | ND                        | ND                        | No           |
| K0090               | LFGIESSSGTILWK      | Yes               | 769.42                 | 978.5                 | 21.94                       | 100.3                    | 36.4                | 6206                            | ND                        | ND                        | No           |
| K0090               | VLLLIDDEYK          | Yes               | 610.84                 | 310.2                 | 18.50                       | 79.8                     | 35.4                | 11110                           | ND                        | ND                        | No           |
| K0090               | VLLLIDDEYK          | Yes               | 610.84                 | 326.2                 | 18.50                       | 79.8                     | 29.4                | 26490                           | ND                        | ND                        | No           |
| K0090               | VLLLIDDEYK          | Yes               | 610.84                 | 669.3                 | 18.50                       | 79.8                     | 29.4                | 11266                           | ND                        | ND                        | No           |
| K0090               | VLLLIDDEYK          | Yes               | 610.84                 | 895.4                 | 18.50                       | 79.8                     | 26.4                | 12582                           | ND                        | ND                        | No           |
| K1C18               | DWSHYFK             | Yes               | 491.72                 | 457.2                 | 15.23                       | 64.4                     | 27.1                | 40257                           | ND                        | ND                        | No           |
| K1C18               | DWSHYFK             | Yes               | 491.72                 | 594.3                 | 15.23                       | 64.4                     | 27.1                | 25845                           | ND                        | ND                        | No           |
| K1C18               | DWSHYFK             | Yes               | 491.72                 | 681.3                 | 15.23                       | 64.4                     | 24.1                | 80298                           | ND                        | ND                        | No           |
| K1C18               | DWSHYFK             | Yes               | 491.72                 | 689.3                 | 15.23                       | 64.4                     | 24.1                | 12235                           | ND                        | ND                        | No           |
| K1C18               | GLQAQIASSGLTVEVDAPK | No                |                        |                       |                             |                          |                     |                                 |                           |                           |              |
| K1C18               | LASYLDR             | Yes               | 419.23                 | 272.2                 | 10.26                       | 55.1                     | 17.9                | 14751                           | ND                        | ND                        | No           |
| K1C18               | LASYLDR             | Yes               | 419.23                 | 566.3                 | 10.26                       | 55.1                     | 20.9                | 19922                           | ND                        | ND                        | No           |
| K1C18               | LASYLDR             | Yes               | 419.23                 | 653.3                 | 10.26                       | 55.1                     | 20.9                | 119038                          | ND                        | ND                        | No           |
| K1C18               | LASYLDR             | Yes               | 419.23                 | 724.4                 | 10.26                       | 55.1                     | 20.9                | 41326                           | ND                        | ND                        | No           |
| K1C18               | LQLETEIEALK         | Yes               | 643.86                 | 331.2                 | 18.73                       | 84.1                     | 39.8                | 43408                           | ND                        | ND                        | No           |
| K1C18               | LQLETEIEALK         | Yes               | 643.86                 | 355.2                 | 18.73                       | 84.1                     | 30.8                | 40800                           | ND                        | ND                        | No           |
| K1C18               | LQLETEIEALK         | Yes               | 643.86                 | 803.5                 | 18.73                       | 84.1                     | 30.8                | 41703                           | ND                        | ND                        | No           |
| K1C18               | LQLETEIEALK         | Yes               | 643.86                 | 932.5                 | 18.73                       | 84.1                     | 30.8                | 37581                           | ND                        | ND                        | No           |

**Table S5.** MRM assay of individual proteins.

| Protein<br>(_HUMAN) | Peptide                 | MS/MS<br>spectrum | Precursor ion<br>(m/z) | Fragment ion<br>(m/z) | Retention time<br>(minutes) | Declustering<br>potential | Collision<br>energy | Area of<br>synthetic<br>peptide | Area in control<br>sample | Area in disease<br>sample | Interference                           |
|---------------------|-------------------------|-------------------|------------------------|-----------------------|-----------------------------|---------------------------|---------------------|---------------------------------|---------------------------|---------------------------|----------------------------------------|
| K1C18               | VVSETNDTK               | Yes               | 496.75                 | 578.3                 | 5.44                        | 65.1                      | 33.4                | 125330                          | ND                        | ND                        | No                                     |
| K1C18               | VVSETNDTK               | Yes               | 496.75                 | 707.3                 | 5.44                        | 65.1                      | 24.4                | 31118                           | ND                        | ND                        | No                                     |
| K1C18               | VVSETNDTK               | Yes               | 496.75                 | 794.4                 | 5.44                        | 65.1                      | 24.4                | 843799                          | ND                        | ND                        | No                                     |
| K1C18               | VVSETNDTK               | Yes               | 496.75                 | 893.4                 | 5.44                        | 65.1                      | 24.4                | 42506                           | ND                        | ND                        | No                                     |
| K1C19               | APSIHGGSGGR             | Yes               | 498.25                 | 369.2                 | 5.57                        | 65.3                      | 27.4                | 15471                           | ND                        | ND                        | No                                     |
| K1C19               | APSIHGGSGGR             | Yes               | 498.25                 | 627.3                 | 5.57                        | 65.3                      | 30.4                | 90666                           | ND                        | ND                        | No                                     |
| K1C19               | APSIHGGSGGR             | Yes               | 498.25                 | 740.4                 | 5.57                        | 65.3                      | 33.4                | 13319                           | ND                        | ND                        | No                                     |
| K1C19               | APSIHGGSGGR             | Yes               | 498.25                 | 827.4                 | 5.57                        | 65.3                      | 27.4                | 27170                           | ND                        | ND                        | No                                     |
| K1C19               | FQAQLAHIQALISGIEAQLGDVR | Yes               | 803.11                 | 274.2                 | 24.71                       | 104.6                     | 47.5                | 89819                           | ND                        | 88592                     | No                                     |
| K1C19               | FQAQLAHIQALISGIEAQLGDVR | Yes               | 803.11                 | 559.3                 | 24.71                       | 104.6                     | 35.5                | 19055                           | ND                        | 29939                     | No                                     |
| K1C19               | FQAQLAHIQALISGIEAQLGDVR | Yes               | 803.11                 | 758.4                 | 24.71                       | 104.6                     | 38.5                | 30564                           | ND                        | 28236                     | No                                     |
| K1C19               | FQAQLAHIQALISGIEAQLGDVR | Yes               | 803.11                 | 887.5                 | 24.71                       | 104.6                     | 38.5                | 33427                           | ND                        | 14423                     | Yes (Based on<br>Transition<br>Ratios) |
| K1C19               | FGPGVAFR                | Yes               | 425.73                 | 393.2                 | 13.69                       | 55.9                      | 24.2                | 525916                          | ND                        | ND                        | No                                     |
| K1C19               | FGPGVAFR                | Yes               | 425.73                 | 549.3                 | 13.69                       | 55.9                      | 27.2                | 805317                          | ND                        | ND                        | No                                     |
| K1C19               | FGPGVAFR                | Yes               | 425.73                 | 646.4                 | 13.69                       | 55.9                      | 21.2                | 250479                          | ND                        | ND                        | No                                     |
| K1C19               | FGPGVAFR                | Yes               | 425.73                 | 703.4                 | 13.69                       | 55.9                      | 21.2                | 224365                          | ND                        | ND                        | No                                     |
| K1C19               | GQVGGQVSVEVDSAPGTDLAK   | Yes               | 1007.51                | 626.3                 | 13.35                       | 131                       | 43.8                | 2994                            | ND                        | ND                        | No                                     |
| K1C19               | GQVGGQVSVEVDSAPGTDLAK   | Yes               | 1007.51                | 701.4                 | 13.35                       | 131                       | 52.8                | 13037                           | ND                        | ND                        | No                                     |
| K1C19               | GQVGGQVSVEVDSAPGTDLAK   | Yes               | 1007.51                | 713.4                 | 13.35                       | 131                       | 52.8                | ND                              | ND                        | ND                        | No                                     |
| K1C19               | GQVGGQVSVEVDSAPGTDLAK   | Yes               | 1007.51                | 772.4                 | 13.35                       | 131                       | 52.8                | 2761                            | ND                        | ND                        | No                                     |
| K1C19               | SLLEGQEDHYNNLSASK       | Yes               | 635.64                 | 305.2                 | 11.76                       | 83                        | 39                  | 60901                           | ND                        | ND                        | No                                     |
| K1C19               | SLLEGQEDHYNNLSASK       | Yes               | 635.64                 | 314.2                 | 11.76                       | 83                        | 30                  | 63871                           | ND                        | ND                        | No                                     |

**Table S5.** MRM assay of individual proteins.

| Protein<br>(_HUMAN) | Peptide            | MS/MS<br>spectrum | Precursor ion<br>(m/z) | Fragment ion<br>(m/z) | Retention time<br>(minutes) | Declustering<br>potential | Collision<br>energy | Area of<br>synthetic<br>peptide | Area in control<br>sample | Area in disease<br>sample | Interference |
|---------------------|--------------------|-------------------|------------------------|-----------------------|-----------------------------|---------------------------|---------------------|---------------------------------|---------------------------|---------------------------|--------------|
| K1C19               | SLLEGQEDHYNNLSASK  | Yes               | 635.64                 | 392.2                 | 11.76                       | 83                        | 39                  | 63359                           | ND                        | ND                        | No           |
| K1C19               | SLLEGQEDHYNNLSASK  | Yes               | 635.64                 | 505.3                 | 11.76                       | 83                        | 39                  | 11258                           | ND                        | ND                        | No           |
| K2C8                | ISSSSFSR           | Yes               | 435.72                 | 496.3                 | 8.16                        | 57.2                      | 24.7                | 4503                            | ND                        | ND                        | No           |
| K2C8                | ISSSSFSR           | Yes               | 435.72                 | 583.3                 | 8.16                        | 57.2                      | 18.7                | 3436                            | ND                        | ND                        | No           |
| K2C8                | ISSSSFSR           | Yes               | 435.72                 | 670.3                 | 8.16                        | 57.2                      | 21.7                | 17199                           | ND                        | ND                        | No           |
| K2C8                | ISSSSFSR           | Yes               | 435.72                 | 757.3                 | 8.16                        | 57.2                      | 21.7                | 20185                           | ND                        | ND                        | No           |
| K2C8                | LQAEIEGLK          | Yes               | 500.79                 | 559.3                 | 12.46                       | 65.6                      | 33.5                | 143551                          | ND                        | ND                        | No           |
| K2C8                | LQAEIEGLK          | Yes               | 500.79                 | 688.4                 | 12.46                       | 65.6                      | 24.5                | 134266                          | ND                        | ND                        | No           |
| K2C8                | LQAEIEGLK          | Yes               | 500.79                 | 759.4                 | 12.46                       | 65.6                      | 24.5                | 719265                          | ND                        | ND                        | No           |
| K2C8                | LQAEIEGLK          | Yes               | 500.79                 | 887.5                 | 12.46                       | 65.6                      | 24.5                | 57094                           | ND                        | ND                        | No           |
| K2C8                | SYTSGPGSR          | Yes               | 456.21                 | 352.2                 | 5.81                        | 59.9                      | 28.6                | 6414                            | ND                        | ND                        | No           |
| K2C8                | SYTSGPGSR          | Yes               | 456.21                 | 416.2                 | 5.81                        | 59.9                      | 25.6                | 12098                           | ND                        | ND                        | No           |
| K2C8                | SYTSGPGSR          | Yes               | 456.21                 | 560.3                 | 5.81                        | 59.9                      | 22.6                | 17279                           | ND                        | ND                        | No           |
| K2C8                | SYTSGPGSR          | Yes               | 456.21                 | 661.3                 | 5.81                        | 59.9                      | 22.6                | 35569                           | ND                        | ND                        | No           |
| K2C8                | WLLQQQK            | Yes               | 515.79                 | 403.2                 | 14.99                       | 67.5                      | 25.2                | 67964                           | ND                        | ND                        | No           |
| K2C8                | WLLQQQK            | Yes               | 515.79                 | 644.4                 | 14.99                       | 67.5                      | 25.2                | 138081                          | ND                        | ND                        | No           |
| K2C8                | WLLQQQK            | Yes               | 515.79                 | 757.5                 | 14.99                       | 67.5                      | 25.2                | 173442                          | ND                        | ND                        | No           |
| K2C8                | WLLQQQK            | Yes               | 515.79                 | 844.5                 | 14.99                       | 67.5                      | 25.2                | 128903                          | ND                        | ND                        | No           |
| K2C8                | YEELQSLAGK         | Yes               | 569.29                 | 293.1                 | 12.27                       | 74.4                      | 27.5                | 1240348                         | ND                        | ND                        | No           |
| K2C8                | YEELQSLAGK         | Yes               | 569.29                 | 603.3                 | 12.27                       | 74.4                      | 27.5                | 150415                          | ND                        | ND                        | No           |
| K2C8                | YEELQSLAGK         | Yes               | 569.29                 | 716.4                 | 12.27                       | 74.4                      | 27.5                | 186212                          | ND                        | ND                        | No           |
| K2C8                | YEELQSLAGK         | Yes               | 569.29                 | 845.5                 | 12.27                       | 74.4                      | 27.5                | 320810                          | ND                        | ND                        | No           |
| KIT                 | INSVGSTASSQPLLHDDV | Yes               | 1013.51                | 485.2                 | 14.66                       | 131.7                     | 50.1                | 5751                            | ND                        | ND                        | No           |

**Table S5.** MRM assay of individual proteins.

| Protein<br>(_HUMAN) | Peptide             | MS/MS<br>spectrum | Precursor ion<br>(m/z) | Fragment ion<br>(m/z) | Retention time<br>(minutes) | Declustering<br>potential | Collision<br>energy | Area of<br>synthetic<br>peptide | Area in control<br>sample | Area in disease<br>sample | Interference                       |
|---------------------|---------------------|-------------------|------------------------|-----------------------|-----------------------------|---------------------------|---------------------|---------------------------------|---------------------------|---------------------------|------------------------------------|
| KIT                 | INSVGSTASSSQPLLHDDV | Yes               | 1013.51                | 584.3                 | 14.66                       | 131.7                     | 50.1                | 4006                            | ND                        | ND                        | No                                 |
| KIT                 | INSVGSTASSSQPLLHDDV | Yes               | 1013.51                | 697.4                 | 14.66                       | 131.7                     | 47.1                | 2625                            | ND                        | ND                        | No                                 |
| KIT                 | INSVGSTASSSQPLLHDDV | Yes               | 1013.51                | 907.5                 | 14.66                       | 131.7                     | 50.1                | 5732                            | ND                        | ND                        | No                                 |
| KIT                 | LVVQSSIDSSAFK       | Yes               | 690.87                 | 312.2                 | 14.14                       | 90.1                      | 32.9                | 52555                           | ND                        | ND                        | No                                 |
| KIT                 | LVVQSSIDSSAFK       | Yes               | 690.87                 | 654.3                 | 14.14                       | 90.1                      | 35.9                | 31514                           | ND                        | ND                        | No                                 |
| KIT                 | LVVQSSIDSSAFK       | Yes               | 690.87                 | 854.4                 | 14.14                       | 90.1                      | 32.9                | 27168                           | ND                        | ND                        | No                                 |
| KIT                 | LVVQSSIDSSAFK       | Yes               | 690.87                 | 941.5                 | 14.14                       | 90.1                      | 32.9                | 66812                           | ND                        | ND                        | No                                 |
| KIT                 | QATLTISSAR          | Yes               | 524.29                 | 420.2                 | 10.03                       | 68.6                      | 25.6                | 38107                           | 13022                     | 17652                     | No                                 |
| KIT                 | QATLTISSAR          | Yes               | 524.29                 | 634.4                 | 10.03                       | 68.6                      | 31.6                | 42789                           | 18723                     | 29114                     | No                                 |
| KIT                 | QATLTISSAR          | Yes               | 524.29                 | 747.4                 | 10.03                       | 68.6                      | 34.6                | 10636                           | 3154                      | 5379                      | No                                 |
| KIT                 | QATLTISSAR          | Yes               | 524.29                 | 848.5                 | 10.03                       | 68.6                      | 34.6                | 14442                           | 4368                      | 3889                      | No                                 |
| KIT                 | TSAYFNFAFK          | Yes               | 598.29                 | 294.2                 | 19.64                       | 78.2                      | 37.8                | 91192                           | ND                        | ND                        | No                                 |
| KIT                 | TSAYFNFAFK          | Yes               | 598.29                 | 626.3                 | 19.64                       | 78.2                      | 28.8                | 56801                           | ND                        | ND                        | No                                 |
| KIT                 | TSAYFNFAFK          | Yes               | 598.29                 | 773.4                 | 19.64                       | 78.2                      | 28.8                | 183342                          | ND                        | ND                        | No                                 |
| KIT                 | TSAYFNFAFK          | Yes               | 598.29                 | 936.5                 | 19.64                       | 78.2                      | 28.8                | 88407                           | ND                        | ND                        | No                                 |
| KIT                 | YVSELHLTR           | Yes               | 373.21                 | 263.1                 | 11.35                       | 49.1                      | 16.6                | 34985                           | 22684                     | 21209                     | No                                 |
| KIT                 | YVSELHLTR           | Yes               | 373.21                 | 276.2                 | 11.35                       | 49.1                      | 25.6                | ND                              | 23722                     | 22228                     | Yes (Based on<br>Manual<br>Review) |
| KIT                 | YVSELHLTR           | Yes               | 373.21                 | 526.3                 | 11.35                       | 49.1                      | 22.6                | 34436                           | 28917                     | 29088                     | No                                 |
| KIT                 | YVSELHLTR           | Yes               | 373.21                 | 639.4                 | 11.35                       | 49.1                      | 19.6                | 8194                            | 8203                      | 4369                      | No                                 |
| KITH                | EVEVIGGADK          | Yes               | 508.77                 | 447.2                 | 9.14                        | 66.6                      | 24.9                | 559336                          | ND                        | ND                        | No                                 |
| KITH                | EVEVIGGADK          | Yes               | 508.77                 | 560.3                 | 9.14                        | 66.6                      | 24.9                | 393080                          | ND                        | ND                        | No                                 |
| KITH                | EVEVIGGADK          | Yes               | 508.77                 | 659.4                 | 9.14                        | 66.6                      | 24.9                | 118363                          | ND                        | ND                        | No                                 |

**Table S5.** MRM assay of individual proteins.

| Protein<br>(_HUMAN) | Peptide             | MS/MS<br>spectrum | Precursor ion<br>(m/z) | Fragment ion<br>(m/z) | Retention time<br>(minutes) | Declustering<br>potential | Collision<br>energy | Area of<br>synthetic<br>peptide | Area in control<br>sample | Area in disease<br>sample | Interference |
|---------------------|---------------------|-------------------|------------------------|-----------------------|-----------------------------|---------------------------|---------------------|---------------------------------|---------------------------|---------------------------|--------------|
| KITH                | EVEVIGGADK          | Yes               | 508.77                 | 788.4                 | 9.14                        | 66.6                      | 24.9                | 187970                          | ND                        | ND                        | No           |
| KITH                | KPFGAILNLVPLAESVVK  | Yes               | 632.38                 | 727.5                 | 24.56                       | 82.6                      | 38.8                | 29076                           | ND                        | ND                        | No           |
| KITH                | KPFGAILNLVPLAESVVK  | Yes               | 632.38                 | 841.5                 | 24.56                       | 82.6                      | 26.8                | 75609                           | ND                        | ND                        | No           |
| KITH                | KPFGAILNLVPLAESVVK  | Yes               | 632.38                 | 842.5                 | 24.56                       | 82.6                      | 29.8                | 366451                          | ND                        | ND                        | No           |
| KITH                | KPFGAILNLVPLAESVVK  | Yes               | 632.38                 | 954.6                 | 24.56                       | 82.6                      | 29.8                | 71281                           | ND                        | ND                        | No           |
| KLK11               | ILQLILLALATGLVGGETR | No                |                        |                       |                             |                           |                     |                                 |                           |                           |              |
| KLK11               | LPHTLR              | Yes               | 368.73                 | 389.3                 | 7.50                        | 48.6                      | 21.7                | 5039                            | ND                        | ND                        | No           |
| KLK11               | LPHTLR              | Yes               | 368.73                 | 526.3                 | 7.50                        | 48.6                      | 27.7                | 7015                            | ND                        | ND                        | No           |
| KLK11               | LPHTLR              | Yes               | 368.73                 | 623.4                 | 7.50                        | 48.6                      | 27.7                | 3491                            | ND                        | ND                        | No           |
| KLK11               | TATESFPHPGFNNSLPNK  | Yes               | 979.47                 | 261.2                 | 13.44                       | 127.4                     | 51.6                | 6384                            | ND                        | ND                        | No           |
| KLK11               | TATESFPHPGFNNSLPNK  | Yes               | 979.47                 | 358.2                 | 13.44                       | 127.4                     | 51.6                | 45350                           | ND                        | ND                        | No           |
| KLK11               | TATESFPHPGFNNSLPNK  | Yes               | 979.47                 | 637.3                 | 13.44                       | 127.4                     | 48.6                | 2694                            | ND                        | ND                        | No           |
| KLK11               | TATESFPHPGFNNSLPNK  | Yes               | 979.47                 | 871.4                 | 13.44                       | 127.4                     | 54.6                | 3904                            | ND                        | ND                        | No           |
| KLK11               | YIVHLGQHNLQK        | Yes               | 725.4                  | 513.3                 | 10.52                       | 94.6                      | 40.4                | 4541                            | ND                        | ND                        | No           |
| KLK11               | YIVHLGQHNLQK        | Yes               | 725.4                  | 626.4                 | 10.52                       | 94.6                      | 37.4                | 3854                            | ND                        | ND                        | No           |
| KLK11               | YIVHLGQHNLQK        | Yes               | 725.4                  | 824.4                 | 10.52                       | 94.6                      | 37.4                | 3914                            | ND                        | ND                        | No           |
| KLK11               | YIVHLGQHNLQK        | Yes               | 725.4                  | 948.5                 | 10.52                       | 94.6                      | 34.4                | ND                              | ND                        | ND                        | No           |
| KLK13               | VEAGEQVR            | Yes               | 444.23                 | 274.2                 | 8.26                        | 58.3                      | 25                  | 3770                            | ND                        | ND                        | No           |
| KLK13               | VEAGEQVR            | Yes               | 444.23                 | 588.3                 | 8.26                        | 58.3                      | 19                  | ND                              | ND                        | ND                        | No           |
| KLK13               | VEAGEQVR            | Yes               | 444.23                 | 659.3                 | 8.26                        | 58.3                      | 22                  | 61655                           | ND                        | ND                        | No           |
| KLK13               | VEAGEQVR            | Yes               | 444.23                 | 788.4                 | 8.26                        | 58.3                      | 19                  | 13572                           | ND                        | ND                        | No           |
| KLK13               | VSGWGTTTSPQVNYPK    | Yes               | 861.43                 | 407.2                 | 13.20                       | 112.1                     | 43.4                | 11581                           | ND                        | ND                        | No           |
| KLK13               | VSGWGTTTSPQVNYPK    | Yes               | 861.43                 | 430.2                 | 13.20                       | 112.1                     | 40.4                | 11795                           | ND                        | ND                        | No           |

**Table S5.** MRM assay of individual proteins.

| Protein<br>(_HUMAN) | Peptide          | MS/MS<br>spectrum | Precursor ion<br>(m/z) | Fragment ion<br>(m/z) | Retention time<br>(minutes) | Declustering<br>potential | Collision<br>energy | Area of<br>synthetic<br>peptide | Area in control<br>sample | Area in disease<br>sample | Interference |
|---------------------|------------------|-------------------|------------------------|-----------------------|-----------------------------|---------------------------|---------------------|---------------------------------|---------------------------|---------------------------|--------------|
| KLK13               | VSGWGTTTSPQVNYPK | Yes               | 861.43                 | 521.3                 | 13.20                       | 112.1                     | 49.4                | 18144                           | ND                        | ND                        | No           |
| KLK13               | VSGWGTTTSPQVNYPK | Yes               | 861.43                 | 932.5                 | 13.20                       | 112.1                     | 40.4                | 10007                           | ND                        | ND                        | No           |
| KLK13               | YVLWIR           | Yes               | 425.25                 | 288.2                 | 18.52                       | 55.9                      | 27.2                | 6388                            | ND                        | ND                        | No           |
| KLK13               | YVLWIR           | Yes               | 425.25                 | 474.3                 | 18.52                       | 55.9                      | 21.2                | 9332                            | ND                        | ND                        | No           |
| KLK13               | YVLWIR           | Yes               | 425.25                 | 587.4                 | 18.52                       | 55.9                      | 21.2                | 10059                           | ND                        | ND                        | No           |
| KLK13               | YVLWIR           | Yes               | 425.25                 | 686.4                 | 18.52                       | 55.9                      | 24.2                | 3135                            | ND                        | ND                        | No           |
| KLK14               | QVTHPNYNSR       | Yes               | 608.3                  | 329.2                 | 8.11                        | 79.5                      | 38.3                | 774                             | ND                        | ND                        | No           |
| KLK14               | QVTHPNYNSR       | Yes               | 608.3                  | 750.4                 | 8.11                        | 79.5                      | 35.3                | ND                              | ND                        | ND                        | No           |
| KLK14               | QVTHPNYNSR       | Yes               | 608.3                  | 887.4                 | 8.11                        | 79.5                      | 35.3                | ND                              | ND                        | ND                        | No           |
| KLK14               | QVTHPNYNSR       | Yes               | 608.3                  | 988.5                 | 8.11                        | 79.5                      | 26.3                | ND                              | ND                        | ND                        | No           |
| KLK14               | VLGSGTWPSAPK     | Yes               | 600.32                 | 499.3                 | 13.43                       | 78.4                      | 37.9                | 379716                          | ND                        | ND                        | No           |
| KLK14               | VLGSGTWPSAPK     | Yes               | 600.32                 | 843.4                 | 13.43                       | 78.4                      | 28.9                | 52969                           | ND                        | ND                        | No           |
| KLK14               | VLGSGTWPSAPK     | Yes               | 600.32                 | 930.5                 | 13.43                       | 78.4                      | 28.9                | 21865                           | ND                        | ND                        | No           |
| KLK14               | VLGSGTWPSAPK     | Yes               | 600.32                 | 987.5                 | 13.43                       | 78.4                      | 28.9                | 197324                          | ND                        | ND                        | No           |
| KLK14               | VSGWGTISSPIAR    | Yes               | 665.86                 | 630.4                 | 15.91                       | 86.9                      | 40.8                | 53321                           | ND                        | ND                        | No           |
| KLK14               | VSGWGTISSPIAR    | Yes               | 665.86                 | 743.4                 | 15.91                       | 86.9                      | 40.8                | 17320                           | ND                        | ND                        | No           |
| KLK14               | VSGWGTISSPIAR    | Yes               | 665.86                 | 844.5                 | 15.91                       | 86.9                      | 40.8                | 10069                           | ND                        | ND                        | No           |
| KLK14               | VSGWGTISSPIAR    | Yes               | 665.86                 | 901.5                 | 15.91                       | 86.9                      | 31.8                | 21485                           | ND                        | ND                        | No           |
| KLK6                | ESSQEQSSVVR      | Yes               | 618.3                  | 460.3                 | 6.14                        | 80.8                      | 38.7                | 12017                           | ND                        | ND                        | No           |
| KLK6                | ESSQEQSSVVR      | Yes               | 618.3                  | 547.3                 | 6.14                        | 80.8                      | 29.7                | 23469                           | ND                        | ND                        | No           |
| KLK6                | ESSQEQSSVVR      | Yes               | 618.3                  | 675.4                 | 6.14                        | 80.8                      | 29.7                | 19304                           | ND                        | ND                        | No           |
| KLK6                | ESSQEQSSVVR      | Yes               | 618.3                  | 804.4                 | 6.14                        | 80.8                      | 38.7                | 23341                           | ND                        | ND                        | No           |
| KLK6                | LSELIQPLPLER     | Yes               | 469.95                 | 443.3                 | 18.96                       | 61.6                      | 21.5                | 28406                           | ND                        | ND                        | No           |

**Table S5.** MRM assay of individual proteins.

| Protein<br>(_HUMAN) | Peptide              | MS/MS<br>spectrum | Precursor ion<br>(m/z) | Fragment ion<br>(m/z) | Retention time<br>(minutes) | Declustering<br>potential | Collision<br>energy | Area of<br>synthetic<br>peptide | Area in control<br>sample | Area in disease<br>sample | Interference                           |
|---------------------|----------------------|-------------------|------------------------|-----------------------|-----------------------------|---------------------------|---------------------|---------------------------------|---------------------------|---------------------------|----------------------------------------|
| KLK6                | LSELIQPLPLER         | Yes               | 469.95                 | 514.3                 | 18.96                       | 61.6                      | 21.5                | 136672                          | 10147                     | 11839                     | No                                     |
| KLK6                | LSELIQPLPLER         | Yes               | 469.95                 | 684.4                 | 18.96                       | 61.6                      | 21.5                | 28951                           | ND                        | ND                        | No                                     |
| KLK6                | LSELIQPLPLER         | Yes               | 469.95                 | 724.4                 | 18.96                       | 61.6                      | 18.5                | 32845                           | 2425                      | 3820                      | No                                     |
| KLK6                | YTNWIQK              | Yes               | 476.75                 | 388.3                 | 11.67                       | 62.5                      | 32.5                | 56570                           | ND                        | ND                        | No                                     |
| KLK6                | YTNWIQK              | Yes               | 476.75                 | 574.3                 | 11.67                       | 62.5                      | 23.5                | 28362                           | ND                        | ND                        | No                                     |
| KLK6                | YTNWIQK              | Yes               | 476.75                 | 688.4                 | 11.67                       | 62.5                      | 23.5                | 95829                           | ND                        | ND                        | No                                     |
| KLK6                | YTNWIQK              | Yes               | 476.75                 | 789.4                 | 11.67                       | 62.5                      | 23.5                | 71778                           | ND                        | ND                        | No                                     |
| KNG1                | DFVQPPTK             | Yes               | 466.25                 | 263.1                 | 9.53                        | 61.1                      | 23                  | 1236466                         | 98770                     | 104063                    | Yes (Based on<br>Transition<br>Ratios) |
| KNG1                | DFVQPPTK             | Yes               | 466.25                 | 442.3                 | 9.53                        | 61.1                      | 26                  | 1129015                         | 11706                     | 14598                     | No                                     |
| KNG1                | DFVQPPTK             | Yes               | 466.25                 | 570.3                 | 9.53                        | 61.1                      | 23                  | 388951                          | 3410                      | ND                        | No                                     |
| KNG1                | DFVQPPTK             | Yes               | 466.25                 | 669.4                 | 9.53                        | 61.1                      | 23                  | ND                              | 4565                      | 5393                      | Yes (Based on<br>Manual<br>Review)     |
| KNG1                | DIPTNSPELEETLHTITK   | Yes               | 713.7                  | 361.2                 | 17.85                       | 93.1                      | 39.9                | 12783                           | ND                        | ND                        | No                                     |
| KNG1                | DIPTNSPELEETLHTITK   | Yes               | 713.7                  | 462.3                 | 17.85                       | 93.1                      | 39.9                | 19736                           | ND                        | ND                        | No                                     |
| KNG1                | DIPTNSPELEETLHTITK   | Yes               | 713.7                  | 599.4                 | 17.85                       | 93.1                      | 42.9                | 24620                           | ND                        | ND                        | No                                     |
| KNG1                | DIPTNSPELEETLHTITK   | Yes               | 713.7                  | 914.5                 | 17.85                       | 93.1                      | 36.9                | 6774                            | ND                        | ND                        | No                                     |
| KNG1                | GHGLGHHGHEQQHGLGHGHK | No                |                        |                       |                             |                           |                     |                                 |                           |                           |                                        |
| KNG1                | LDDDLEHQGGHVLDHGHK   | Yes               | 674.65                 | 459.2                 | 9.44                        | 88                        | 38                  | 7477                            | ND                        | ND                        | No                                     |
| KNG1                | LDDDLEHQGGHVLDHGHK   | Yes               | 674.65                 | 478.3                 | 9.44                        | 88                        | 38                  | 16114                           | ND                        | ND                        | No                                     |
| KNG1                | LDDDLEHQGGHVLDHGHK   | Yes               | 674.65                 | 706.4                 | 9.44                        | 88                        | 35                  | 6625                            | ND                        | ND                        | No                                     |
| KNG1                | LDDDLEHQGGHVLDHGHK   | Yes               | 674.65                 | 805.4                 | 9.44                        | 88                        | 38                  | 3411                            | ND                        | ND                        | No                                     |

**Table S5.** MRM assay of individual proteins.

| Protein<br>(_HUMAN) | Peptide        | MS/MS<br>spectrum | Precursor ion<br>(m/z) | Fragment ion<br>(m/z) | Retention time<br>(minutes) | Declustering<br>potential | Collision<br>energy | Area of<br>synthetic<br>peptide | Area in control<br>sample | Area in disease<br>sample | Interference                       |
|---------------------|----------------|-------------------|------------------------|-----------------------|-----------------------------|---------------------------|---------------------|---------------------------------|---------------------------|---------------------------|------------------------------------|
| KNG1                | TVGSDFYFSFK    | Yes               | 626.3                  | 381.2                 | 15.27                       | 81.8                      | 39.1                | ND                              | ND                        | ND                        | Yes (Based on<br>Manual<br>Review) |
| KNG1                | TVGSDFYFSFK    | Yes               | 626.3                  | 544.3                 | 15.27                       | 81.8                      | 39.1                | 69557                           | ND                        | 3102                      | No                                 |
| KNG1                | TVGSDFYFSFK    | Yes               | 626.3                  | 907.4                 | 15.27                       | 81.8                      | 39.1                | 12474                           | ND                        | 1609                      | No                                 |
| KNG1                | TVGSDFYFSFK    | Yes               | 626.3                  | 994.5                 | 15.27                       | 81.8                      | 27.1                | 13356                           | ND                        | ND                        | No                                 |
| KPYM                | APIIAVTR       | Yes               | 420.77                 | 375.2                 | 11.03                       | 55.3                      | 21                  | ND                              | ND                        | ND                        | Yes (Based on<br>Manual<br>Review) |
| KPYM                | APIIAVTR       | Yes               | 420.77                 | 446.3                 | 11.03                       | 55.3                      | 24                  | 13824                           | 11987                     | 13415                     | No                                 |
| KPYM                | APIIAVTR       | Yes               | 420.77                 | 559.4                 | 11.03                       | 55.3                      | 24                  | 16235                           | 18137                     | 18611                     | No                                 |
| KPYM                | APIIAVTR       | Yes               | 420.77                 | 672.4                 | 11.03                       | 55.3                      | 30                  | 6723                            | 5703                      | 5676                      | No                                 |
| KPYM                | DPVQEAWAEDVDLR | Yes               | 821.89                 | 288.2                 | 17.96                       | 107                       | 44.7                | 43742                           | ND                        | ND                        | No                                 |
| KPYM                | DPVQEAWAEDVDLR | Yes               | 821.89                 | 440.2                 | 17.96                       | 107                       | 38.7                | 22107                           | ND                        | ND                        | No                                 |
| KPYM                | DPVQEAWAEDVDLR | Yes               | 821.89                 | 569.3                 | 17.96                       | 107                       | 38.7                | 23435                           | ND                        | ND                        | No                                 |
| KPYM                | DPVQEAWAEDVDLR | Yes               | 821.89                 | 640.3                 | 17.96                       | 107                       | 38.7                | 19925                           | ND                        | ND                        | No                                 |
| KPYM                | GDYPLEAVR      | No                |                        |                       |                             |                           |                     |                                 |                           |                           |                                    |
| KPYM                | IYVDDGLISLQVK  | Yes               | 731.91                 | 277.2                 | 19.53                       | 95.4                      | 34.7                | 79444                           | ND                        | ND                        | No                                 |
| KPYM                | IYVDDGLISLQVK  | Yes               | 731.91                 | 574.4                 | 19.53                       | 95.4                      | 34.7                | 24805                           | ND                        | ND                        | No                                 |
| KPYM                | IYVDDGLISLQVK  | Yes               | 731.91                 | 687.4                 | 19.53                       | 95.4                      | 34.7                | 14174                           | ND                        | ND                        | No                                 |
| KPYM                | IYVDDGLISLQVK  | Yes               | 731.91                 | 857.5                 | 19.53                       | 95.4                      | 31.7                | 6678                            | ND                        | ND                        | No                                 |
| KPYM                | LDIDSPITAR     | Yes               | 599.33                 | 557.3                 | 13.47                       | 78.3                      | 37.9                | 59710                           | ND                        | ND                        | No                                 |
| KPYM                | LDIDSPITAR     | Yes               | 599.33                 | 654.4                 | 13.47                       | 78.3                      | 28.9                | 86057                           | ND                        | ND                        | No                                 |
| KPYM                | LDIDSPITAR     | Yes               | 599.33                 | 856.5                 | 13.47                       | 78.3                      | 28.9                | 71258                           | ND                        | ND                        | No                                 |



**Table S5.** MRM assay of individual proteins.

| Protein<br>(_HUMAN) | Peptide         | MS/MS<br>spectrum | Precursor ion<br>(m/z) | Fragment ion<br>(m/z) | Retention time<br>(minutes) | Declustering<br>potential | Collision<br>energy | Area of<br>synthetic<br>peptide | Area in control<br>sample | Area in disease<br>sample | Interference |
|---------------------|-----------------|-------------------|------------------------|-----------------------|-----------------------------|---------------------------|---------------------|---------------------------------|---------------------------|---------------------------|--------------|
| KPYM                | LDIDSPITAR      | Yes               | 599.33                 | 969.5                 | 13.47                       | 78.3                      | 28.9                | 8662                            | ND                        | ND                        | No           |
| KRT35               | DALESTLAETEAR   | Yes               | 703.34                 | 605.3                 | 14.91                       | 91.7                      | 30.4                | 30039                           | ND                        | ND                        | No           |
| KRT35               | DALESTLAETEAR   | Yes               | 703.34                 | 676.3                 | 14.91                       | 91.7                      | 33.4                | 52495                           | ND                        | ND                        | No           |
| KRT35               | DALESTLAETEAR   | Yes               | 703.34                 | 890.5                 | 14.91                       | 91.7                      | 33.4                | 15115                           | ND                        | ND                        | No           |
| KRT35               | DALESTLAETEAR   | Yes               | 703.34                 | 977.5                 | 14.91                       | 91.7                      | 42.4                | 31088                           | ND                        | ND                        | No           |
| KRT35               | LNVEVDAAPPVDLNR | Yes               | 811.43                 | 402.2                 | 15.29                       | 105.7                     | 47.2                | 28240                           | ND                        | ND                        | No           |
| KRT35               | LNVEVDAAPPVDLNR | Yes               | 811.43                 | 456.2                 | 15.29                       | 105.7                     | 38.2                | 16699                           | ND                        | ND                        | No           |
| KRT35               | LNVEVDAAPPVDLNR | Yes               | 811.43                 | 881.5                 | 15.29                       | 105.7                     | 38.2                | 16309                           | ND                        | ND                        | No           |
| KRT35               | LNVEVDAAPPVDLNR | Yes               | 811.43                 | 952.5                 | 15.29                       | 105.7                     | 47.2                | 18142                           | ND                        | ND                        | No           |
| KRT35               | LPSLSPVAR       | Yes               | 470.29                 | 442.3                 | 12.83                       | 61.7                      | 32.2                | 31679                           | ND                        | ND                        | No           |
| KRT35               | LPSLSPVAR       | Yes               | 470.29                 | 529.3                 | 12.83                       | 61.7                      | 32.2                | 32161                           | ND                        | ND                        | No           |
| KRT35               | LPSLSPVAR       | Yes               | 470.29                 | 729.4                 | 12.83                       | 61.7                      | 26.2                | 34667                           | ND                        | ND                        | No           |
| KRT35               | LPSLSPVAR       | Yes               | 470.29                 | 826.5                 | 12.83                       | 61.7                      | 26.2                | 7606                            | ND                        | ND                        | No           |
| KRT35               | LVVEIDNAK       | Yes               | 500.79                 | 447.2                 | 11.69                       | 65.6                      | 33.5                | 62498                           | ND                        | ND                        | No           |
| KRT35               | LVVEIDNAK       | Yes               | 500.79                 | 560.3                 | 11.69                       | 65.6                      | 30.5                | 127119                          | ND                        | ND                        | No           |
| KRT35               | LVVEIDNAK       | Yes               | 500.79                 | 689.3                 | 11.69                       | 65.6                      | 24.5                | 138189                          | ND                        | ND                        | No           |
| KRT35               | LVVEIDNAK       | Yes               | 500.79                 | 788.4                 | 11.69                       | 65.6                      | 24.5                | 468157                          | ND                        | ND                        | No           |
| KRT35               | YETEVSLR        | Yes               | 498.75                 | 293.1                 | 10.54                       | 65.3                      | 21.4                | 77784                           | ND                        | ND                        | No           |
| KRT35               | YETEVSLR        | Yes               | 498.75                 | 375.2                 | 10.54                       | 65.3                      | 27.4                | 21917                           | ND                        | ND                        | No           |
| KRT35               | YETEVSLR        | Yes               | 498.75                 | 603.3                 | 10.54                       | 65.3                      | 24.4                | 10712                           | ND                        | ND                        | No           |
| KRT35               | YETEVSLR        | Yes               | 498.75                 | 704.4                 | 10.54                       | 65.3                      | 24.4                | 51786                           | ND                        | ND                        | No           |
| LAMB2               | DTEQTLYQVQER    | Yes               | 755.36                 | 432.2                 | 11.36                       | 98.4                      | 32.7                | 5251                            | ND                        | ND                        | No           |
| LAMB2               | DTEQTLYQVQER    | Yes               | 755.36                 | 531.3                 | 11.36                       | 98.4                      | 44.7                | 5717                            | ND                        | ND                        | No           |

**Table S5.** MRM assay of individual proteins.

| Protein<br>(_HUMAN) | Peptide                    | MS/MS<br>spectrum | Precursor ion<br>(m/z) | Fragment ion<br>(m/z) | Retention time<br>(minutes) | Decustering<br>potential | Collision<br>energy | Area of<br>synthetic<br>peptide | Area in control<br>sample | Area in disease<br>sample | Interference                           |
|---------------------|----------------------------|-------------------|------------------------|-----------------------|-----------------------------|--------------------------|---------------------|---------------------------------|---------------------------|---------------------------|----------------------------------------|
| LAMB2               | DTEQTLYQVQER               | Yes               | 755.36                 | 822.4                 | 11.36                       | 98.4                     | 35.7                | 9826                            | ND                        | ND                        | No                                     |
| LAMB2               | DTEQTLYQVQER               | Yes               | 755.36                 | 935.5                 | 11.36                       | 98.4                     | 44.7                | 2753                            | ND                        | ND                        | No                                     |
| LAMB2               | IQGTLQPHAR                 | Yes               | 374.21                 | 400.2                 | 6.88                        | 49.3                     | 19.6                | 14207                           | ND                        | ND                        | No                                     |
| LAMB2               | IQGTLQPHAR                 | Yes               | 374.21                 | 480.3                 | 6.88                        | 49.3                     | 19.6                | 92467                           | ND                        | ND                        | No                                     |
| LAMB2               | IQGTLQPHAR                 | Yes               | 374.21                 | 608.3                 | 6.88                        | 49.3                     | 19.6                | 17760                           | ND                        | ND                        | No                                     |
| LAMB2               | IQGTLQPHAR                 | Yes               | 374.21                 | 721.4                 | 6.88                        | 49.3                     | 19.6                | 5954                            | ND                        | ND                        | No                                     |
| LAMB2               | SLADVDAILAR                | Yes               | 572.32                 | 359.2                 | 18.21                       | 74.8                     | 27.7                | 37687                           | ND                        | ND                        | No                                     |
| LAMB2               | SLADVDAILAR                | Yes               | 572.32                 | 658.4                 | 18.21                       | 74.8                     | 27.7                | 88202                           | ND                        | ND                        | No                                     |
| LAMB2               | SLADVDAILAR                | Yes               | 572.32                 | 872.5                 | 18.21                       | 74.8                     | 27.7                | 42046                           | ND                        | ND                        | No                                     |
| LAMB2               | SLADVDAILAR                | Yes               | 572.32                 | 943.5                 | 18.21                       | 74.8                     | 27.7                | 64504                           | ND                        | ND                        | No                                     |
| LAMB2               | TGGSAQPETPYSGPGLLIDSLVLLPR | No                |                        |                       |                             |                          |                     |                                 |                           |                           |                                        |
| LAMB2               | VLELSIPASAEQIQHLAGAIAER    | Yes               | 806.11                 | 342.2                 | 24.26                       | 105                      | 38.7                | 39506                           | 36383                     | 36885                     | No                                     |
| LAMB2               | VLELSIPASAEQIQHLAGAIAER    | Yes               | 806.11                 | 687.4                 | 24.26                       | 105                      | 47.7                | ND                              | ND                        | 9208                      | Yes (Based on<br>Manual<br>Review)     |
| LAMB2               | VLELSIPASAEQIQHLAGAIAER    | Yes               | 806.11                 | 937.5                 | 24.26                       | 105                      | 44.7                | 12616                           | 16384                     | 25218                     | No                                     |
| LAMB2               | VLELSIPASAEQIQHLAGAIAER    | Yes               | 806.11                 | 981.6                 | 24.26                       | 105                      | 35.7                | 27106                           | 11850                     | 12378                     | Yes (Based on<br>Transition<br>Ratios) |
| LDHA                | DQLIYNLLK                  | Yes               | 560.32                 | 357.2                 | 20.42                       | 73.3                     | 27.2                | 25011                           | ND                        | ND                        | No                                     |
| LDHA                | DQLIYNLLK                  | Yes               | 560.32                 | 650.4                 | 20.42                       | 73.3                     | 24.2                | 16189                           | ND                        | ND                        | No                                     |
| LDHA                | DQLIYNLLK                  | Yes               | 560.32                 | 763.5                 | 20.42                       | 73.3                     | 27.2                | 17424                           | ND                        | ND                        | No                                     |
| LDHA                | DQLIYNLLK                  | Yes               | 560.32                 | 876.6                 | 20.42                       | 73.3                     | 27.2                | 12726                           | ND                        | ND                        | No                                     |
| LDHA                | FIIPNVVK                   | Yes               | 465.29                 | 261.2                 | 17.21                       | 61                       | 23                  | 1933498                         | ND                        | 11302                     | No                                     |

**Table S5.** MRM assay of individual proteins.

| Protein<br>(_HUMAN) | Peptide           | MS/MS<br>spectrum | Precursor ion<br>(m/z) | Fragment ion<br>(m/z) | Retention time<br>(minutes) | Declustering<br>potential | Collision<br>energy | Area of<br>synthetic<br>peptide | Area in control<br>sample | Area in disease<br>sample | Interference                           |
|---------------------|-------------------|-------------------|------------------------|-----------------------|-----------------------------|---------------------------|---------------------|---------------------------------|---------------------------|---------------------------|----------------------------------------|
| LDHA                | FIIPNVVK          | Yes               | 465.29                 | 556.3                 | 17.21                       | 61                        | 23                  | 868755                          | ND                        | 12862                     | No                                     |
| LDHA                | FIIPNVVK          | Yes               | 465.29                 | 669.4                 | 17.21                       | 61                        | 23                  | 896224                          | ND                        | 6658                      | No                                     |
| LDHA                | FIIPNVVK          | Yes               | 465.29                 | 782.5                 | 17.21                       | 61                        | 23                  | 84111                           | ND                        | 6705                      | Yes (Based on<br>Transition<br>Ratios) |
| LDHA                | LLIVSNPVDILTYVAWK | No                |                        |                       |                             |                           |                     |                                 |                           |                           |                                        |
| LDHA                | LVIITAGAR         | Yes               | 457.3                  | 588.3                 | 12.59                       | 60                        | 22.6                | 19819                           | 22203                     | 13114                     | No                                     |
| LDHA                | LVIITAGAR         | Yes               | 457.3                  | 611.4                 | 12.59                       | 60                        | 22.6                | ND                              | ND                        | ND                        | No                                     |
| LDHA                | LVIITAGAR         | Yes               | 457.3                  | 701.4                 | 12.59                       | 60                        | 22.6                | 27515                           | 17314                     | 17684                     | No                                     |
| LDHA                | LVIITAGAR         | Yes               | 457.3                  | 800.5                 | 12.59                       | 60                        | 31.6                | 3427                            | ND                        | ND                        | No                                     |
| LDHA                | TLHPDLGTDK        | Yes               | 548.79                 | 352.2                 | 8.60                        | 71.8                      | 26.6                | 308794                          | ND                        | ND                        | No                                     |
| LDHA                | TLHPDLGTDK        | Yes               | 548.79                 | 745.4                 | 8.60                        | 71.8                      | 29.6                | 380094                          | ND                        | ND                        | No                                     |
| LDHA                | TLHPDLGTDK        | Yes               | 548.79                 | 882.4                 | 8.60                        | 71.8                      | 26.6                | 24002                           | ND                        | ND                        | No                                     |
| LDHA                | TLHPDLGTDK        | Yes               | 548.79                 | 950.5                 | 8.60                        | 71.8                      | 23.6                | 5241                            | ND                        | ND                        | No                                     |
| LDHB                | DYSVTANSK         | Yes               | 492.74                 | 348.2                 | 6.86                        | 64.6                      | 24.2                | 166048                          | ND                        | ND                        | No                                     |
| LDHB                | DYSVTANSK         | Yes               | 492.74                 | 520.3                 | 6.86                        | 64.6                      | 24.2                | 277228                          | ND                        | ND                        | No                                     |
| LDHB                | DYSVTANSK         | Yes               | 492.74                 | 619.3                 | 6.86                        | 64.6                      | 24.2                | 124715                          | ND                        | ND                        | No                                     |
| LDHB                | DYSVTANSK         | Yes               | 492.74                 | 706.4                 | 6.86                        | 64.6                      | 24.2                | 534865                          | ND                        | ND                        | No                                     |
| LDHB                | FIIPQIVK          | Yes               | 479.31                 | 261.2                 | 18.83                       | 62.8                      | 20.6                | 2856545                         | 31893                     | 24401                     | No                                     |
| LDHB                | FIIPQIVK          | Yes               | 479.31                 | 584.4                 | 18.83                       | 62.8                      | 23.6                | 2076534                         | 15977                     | 9895                      | No                                     |
| LDHB                | FIIPQIVK          | Yes               | 479.31                 | 697.5                 | 18.83                       | 62.8                      | 23.6                | 1499614                         | 9592                      | 5535                      | No                                     |
| LDHB                | FIIPQIVK          | Yes               | 479.31                 | 810.5                 | 18.83                       | 62.8                      | 23.6                | 112512                          | ND                        | ND                        | No                                     |
| LDHB                | GLTSVINQK         | Yes               | 480.28                 | 502.3                 | 11.16                       | 63                        | 23.6                | 34272                           | 38720                     | 50584                     | No                                     |
| LDHB                | GLTSVINQK         | Yes               | 480.28                 | 601.4                 | 11.16                       | 63                        | 20.6                | 7963                            | 7740                      | 11686                     | No                                     |

**Table S5.** MRM assay of individual proteins.

| Protein<br>(_HUMAN) | Peptide           | MS/MS<br>spectrum | Precursor ion<br>(m/z) | Fragment ion<br>(m/z) | Retention time<br>(minutes) | Declustering<br>potential | Collision<br>energy | Area of<br>synthetic<br>peptide | Area in control<br>sample | Area in disease<br>sample | Interference |
|---------------------|-------------------|-------------------|------------------------|-----------------------|-----------------------------|---------------------------|---------------------|---------------------------------|---------------------------|---------------------------|--------------|
| LDHB                | GLTSVINQK         | Yes               | 480.28                 | 688.4                 | 11.16                       | 63                        | 23.6                | 19348                           | 24315                     | 33281                     | No           |
| LDHB                | GLTSVINQK         | Yes               | 480.28                 | 789.4                 | 11.16                       | 63                        | 23.6                | 19341                           | 22798                     | 31126                     | No           |
| LDHB                | LIAPVAEEEEATVPNNK | Yes               | 847.95                 | 472.3                 | 12.76                       | 110.4                     | 39.8                | 235885                          | ND                        | ND                        | No           |
| LDHB                | LIAPVAEEEEATVPNNK | Yes               | 847.95                 | 571.3                 | 12.76                       | 110.4                     | 39.8                | 18849                           | ND                        | ND                        | No           |
| LDHB                | LIAPVAEEEEATVPNNK | Yes               | 847.95                 | 672.4                 | 12.76                       | 110.4                     | 39.8                | 13133                           | ND                        | ND                        | No           |
| LDHB                | LIAPVAEEEEATVPNNK | Yes               | 847.95                 | 743.4                 | 12.76                       | 110.4                     | 39.8                | 12400                           | ND                        | ND                        | No           |
| LDHB                | NVNVFK            | Yes               | 360.71                 | 294.2                 | 10.27                       | 47.5                      | 24.4                | 384495                          | ND                        | ND                        | No           |
| LDHB                | NVNVFK            | Yes               | 360.71                 | 393.3                 | 10.27                       | 47.5                      | 21.4                | 42997                           | ND                        | ND                        | No           |
| LDHB                | NVNVFK            | Yes               | 360.71                 | 507.3                 | 10.27                       | 47.5                      | 18.4                | 393612                          | ND                        | ND                        | No           |
| LDHB                | NVNVFK            | Yes               | 360.71                 | 606.4                 | 10.27                       | 47.5                      | 18.4                | 33557                           | ND                        | ND                        | No           |
| LEG1                | DGGAWGTEQR        | Yes               | 538.74                 | 301.1                 | 8.23                        | 70.5                      | 23.2                | 71395                           | 1299                      | 3506                      | No           |
| LEG1                | DGGAWGTEQR        | Yes               | 538.74                 | 487.2                 | 8.23                        | 70.5                      | 23.2                | 25754                           | 1277                      | 2562                      | No           |
| LEG1                | DGGAWGTEQR        | Yes               | 538.74                 | 590.3                 | 8.23                        | 70.5                      | 26.2                | 95799                           | 5423                      | 1835                      | No           |
| LEG1                | DGGAWGTEQR        | Yes               | 538.74                 | 776.4                 | 8.23                        | 70.5                      | 29.2                | 80735                           | 2871                      | 2232                      | No           |
| LEG1                | GEVAPDAK          | Yes               | 393.7                  | 286.1                 | 5.68                        | 51.8                      | 19.8                | 30360                           | ND                        | ND                        | No           |
| LEG1                | GEVAPDAK          | Yes               | 393.7                  | 430.2                 | 5.68                        | 51.8                      | 28.8                | 48786                           | ND                        | ND                        | No           |
| LEG1                | GEVAPDAK          | Yes               | 393.7                  | 501.3                 | 5.68                        | 51.8                      | 16.8                | 41607                           | ND                        | ND                        | No           |
| LEG1                | GEVAPDAK          | Yes               | 393.7                  | 600.3                 | 5.68                        | 51.8                      | 16.8                | 63357                           | ND                        | ND                        | No           |
| LEG1                | LPDGYEFK          | Yes               | 484.74                 | 294.2                 | 12.61                       | 63.5                      | 29.8                | 171318                          | 13004                     | ND                        | No           |
| LEG1                | LPDGYEFK          | Yes               | 484.74                 | 643.3                 | 12.61                       | 63.5                      | 32.8                | 66836                           | ND                        | ND                        | No           |
| LEG1                | LPDGYEFK          | Yes               | 484.74                 | 758.3                 | 12.61                       | 63.5                      | 32.8                | 119898                          | 1572                      | ND                        | No           |
| LEG1                | LPDGYEFK          | Yes               | 484.74                 | 855.4                 | 12.61                       | 63.5                      | 23.8                | 76508                           | 2506                      | ND                        | No           |
| LEG1                | SFVLNLGK          | Yes               | 439.26                 | 317.2                 | 16.42                       | 57.7                      | 30.8                | 169729                          | ND                        | ND                        | No           |

**Table S5.** MRM assay of individual proteins.

| Protein<br>(_HUMAN) | Peptide               | MS/MS<br>spectrum | Precursor ion<br>(m/z) | Fragment ion<br>(m/z) | Retention time<br>(minutes) | Declustering<br>potential | Collision<br>energy | Area of<br>synthetic<br>peptide | Area in control<br>sample | Area in disease<br>sample | Interference |
|---------------------|-----------------------|-------------------|------------------------|-----------------------|-----------------------------|---------------------------|---------------------|---------------------------------|---------------------------|---------------------------|--------------|
| LEG1                | SFVLNLGK              | Yes               | 439.26                 | 334.2                 | 16.42                       | 57.7                      | 21.8                | 184051                          | 7381                      | 6391                      | No           |
| LEG1                | SFVLNLGK              | Yes               | 439.26                 | 544.3                 | 16.42                       | 57.7                      | 21.8                | 391583                          | 7952                      | 11326                     | No           |
| LEG1                | SFVLNLGK              | Yes               | 439.26                 | 643.4                 | 16.42                       | 57.7                      | 21.8                | 564059                          | 13318                     | 14045                     | No           |
| LEG3                | GNDVAFHFNPR           | Yes               | 637.31                 | 272.2                 | 12.96                       | 83.2                      | 33.5                | 54834                           | ND                        | ND                        | No           |
| LEG3                | GNDVAFHFNPR           | Yes               | 637.31                 | 533.3                 | 12.96                       | 83.2                      | 39.5                | 3401                            | ND                        | ND                        | No           |
| LEG3                | GNDVAFHFNPR           | Yes               | 637.31                 | 670.3                 | 12.96                       | 83.2                      | 30.5                | 5562                            | ND                        | ND                        | No           |
| LEG3                | GNDVAFHFNPR           | Yes               | 637.31                 | 817.4                 | 12.96                       | 83.2                      | 30.5                | ND                              | ND                        | ND                        | No           |
| LEG3                | IALDFQR               | Yes               | 431.74                 | 303.2                 | 13.91                       | 56.7                      | 21.5                | ND                              | ND                        | ND                        | No           |
| LEG3                | IALDFQR               | Yes               | 431.74                 | 565.3                 | 13.91                       | 56.7                      | 21.5                | 72512                           | 1784                      | ND                        | No           |
| LEG3                | IALDFQR               | Yes               | 431.74                 | 678.4                 | 13.91                       | 56.7                      | 21.5                | 122905                          | 3207                      | ND                        | No           |
| LEG3                | IALDFQR               | Yes               | 431.74                 | 749.4                 | 13.91                       | 56.7                      | 21.5                | 76568                           | 861                       | ND                        | No           |
| LEG3                | IQVLVEPDHFK           | Yes               | 442.25                 | 341.2                 | 14.17                       | 58.1                      | 23.1                | 130009                          | ND                        | ND                        | No           |
| LEG3                | IQVLVEPDHFK           | Yes               | 442.25                 | 643.3                 | 14.17                       | 58.1                      | 23.1                | 158083                          | ND                        | ND                        | No           |
| LEG3                | IQVLVEPDHFK           | Yes               | 442.25                 | 772.4                 | 14.17                       | 58.1                      | 20.1                | 32729                           | ND                        | ND                        | No           |
| LEG3                | IQVLVEPDHFK           | Yes               | 442.25                 | 871.4                 | 14.17                       | 58.1                      | 20.1                | 29542                           | ND                        | ND                        | No           |
| LEG3                | LDNNWGR               | Yes               | 437.71                 | 532.3                 | 9.07                        | 57.5                      | 24.8                | 14005                           | ND                        | ND                        | No           |
| LEG3                | LDNNWGR               | Yes               | 437.71                 | 643.3                 | 9.07                        | 57.5                      | 21.8                | 1451                            | ND                        | ND                        | No           |
| LEG3                | LDNNWGR               | Yes               | 437.71                 | 646.3                 | 9.07                        | 57.5                      | 21.8                | 46398                           | ND                        | ND                        | No           |
| LEG3                | LDNNWGR               | Yes               | 437.71                 | 761.3                 | 9.07                        | 57.5                      | 21.8                | 30198                           | ND                        | ND                        | No           |
| LEG3                | VAVNDAHLLQYNHR        | No                |                        |                       |                             |                           |                     |                                 |                           |                           |              |
| LEG9                | FAVNFQTGFSGNDIAFHFNPR | No                |                        |                       |                             |                           |                     |                                 |                           |                           |              |
| LEG9                | FDENAVVR              | Yes               | 475.24                 | 373.3                 | 9.70                        | 62.3                      | 23.4                | 48964                           | ND                        | ND                        | No           |
| LEG9                | FDENAVVR              | Yes               | 475.24                 | 558.3                 | 9.70                        | 62.3                      | 23.4                | 50659                           | ND                        | ND                        | No           |

**Table S5.** MRM assay of individual proteins.

| Protein<br>(_HUMAN) | Peptide        | MS/MS<br>spectrum | Precursor ion<br>(m/z) | Fragment ion<br>(m/z) | Retention time<br>(minutes) | Decustering<br>potential | Collision<br>energy | Area of<br>synthetic<br>peptide | Area in control<br>sample | Area in disease<br>sample | Interference                           |
|---------------------|----------------|-------------------|------------------------|-----------------------|-----------------------------|--------------------------|---------------------|---------------------------------|---------------------------|---------------------------|----------------------------------------|
| LEG9                | FDENAVVR       | Yes               | 475.24                 | 687.4                 | 9.70                        | 62.3                     | 23.4                | 81623                           | ND                        | ND                        | No                                     |
| LEG9                | FDENAVVR       | Yes               | 475.24                 | 802.4                 | 9.70                        | 62.3                     | 32.4                | 63970                           | ND                        | ND                        | No                                     |
| LEG9                | NTQIDNSWGSEER  | Yes               | 768.34                 | 344.2                 | 10.71                       | 100.1                    | 36.3                | 16804                           | ND                        | ND                        | No                                     |
| LEG9                | NTQIDNSWGSEER  | Yes               | 768.34                 | 457.2                 | 10.71                       | 100.1                    | 36.3                | 7648                            | ND                        | ND                        | No                                     |
| LEG9                | NTQIDNSWGSEER  | Yes               | 768.34                 | 577.3                 | 10.71                       | 100.1                    | 36.3                | 14174                           | ND                        | ND                        | No                                     |
| LEG9                | NTQIDNSWGSEER  | Yes               | 768.34                 | 964.4                 | 10.71                       | 100.1                    | 42.3                | 5828                            | ND                        | ND                        | No                                     |
| LEG9                | SILLSGTVLPSAQR | Yes               | 721.42                 | 314.2                 | 17.11                       | 94.1                     | 34.2                | 169161                          | ND                        | ND                        | No                                     |
| LEG9                | SILLSGTVLPSAQR | Yes               | 721.42                 | 558.3                 | 17.11                       | 94.1                     | 34.2                | 153890                          | 97881                     | ND                        | Yes (Based on<br>Transition<br>Ratios) |
| LEG9                | SILLSGTVLPSAQR | Yes               | 721.42                 | 671.4                 | 17.11                       | 94.1                     | 34.2                | 67569                           | 5865                      | ND                        | Yes (Based on<br>Transition<br>Ratios) |
| LEG9                | SILLSGTVLPSAQR | Yes               | 721.42                 | 928.5                 | 17.11                       | 94.1                     | 43.2                | 40370                           | ND                        | ND                        | No                                     |
| LEG9                | VAVDGQHLFEYYHR | Yes               | 578.62                 | 475.2                 | 14.57                       | 75.6                     | 33.1                | 7545                            | ND                        | ND                        | No                                     |
| LEG9                | VAVDGQHLFEYYHR | Yes               | 578.62                 | 638.3                 | 14.57                       | 75.6                     | 36.1                | 5378                            | ND                        | ND                        | No                                     |
| LEG9                | VAVDGQHLFEYYHR | Yes               | 578.62                 | 767.3                 | 14.57                       | 75.6                     | 30.1                | 3430                            | ND                        | ND                        | No                                     |
| LEG9                | VAVDGQHLFEYYHR | Yes               | 578.62                 | 914.4                 | 14.57                       | 75.6                     | 33.1                | 7963                            | ND                        | ND                        | No                                     |
| LG3BP               | ASHEEVEGLVEK   | Yes               | 442.89                 | 545.3                 | 9.84                        | 58.1                     | 20.1                | 177073                          | 155092                    | 74004                     | No                                     |
| LG3BP               | ASHEEVEGLVEK   | Yes               | 442.89                 | 554.2                 | 9.84                        | 58.1                     | 23.1                | 179713                          | 155835                    | 82769                     | No                                     |
| LG3BP               | ASHEEVEGLVEK   | Yes               | 442.89                 | 653.3                 | 9.84                        | 58.1                     | 20.1                | 65271                           | 48020                     | 33798                     | No                                     |
| LG3BP               | ASHEEVEGLVEK   | Yes               | 442.89                 | 674.4                 | 9.84                        | 58.1                     | 20.1                | 69101                           | 65386                     | 35399                     | No                                     |
| LG3BP               | AVDTWSWGER     | No                |                        |                       |                             |                          |                     |                                 |                           |                           |                                        |
| LG3BP               | STHTLDSR       | Yes               | 343.85                 | 262.2                 | 8.72                        | 45.4                     | 18.1                | 274082                          | 106162                    | 66357                     | No                                     |

**Table S5.** MRM assay of individual proteins.

| Protein<br>(_HUMAN) | Peptide          | MS/MS<br>spectrum | Precursor ion<br>(m/z) | Fragment ion<br>(m/z) | Retention time<br>(minutes) | Declustering<br>potential | Collision<br>energy | Area of<br>synthetic<br>peptide | Area in control<br>sample | Area in disease<br>sample | Interference |
|---------------------|------------------|-------------------|------------------------|-----------------------|-----------------------------|---------------------------|---------------------|---------------------------------|---------------------------|---------------------------|--------------|
| LG3BP               | STHTLDLSR        | Yes               | 343.85                 | 375.2                 | 8.72                        | 45.4                      | 21.1                | 129737                          | 70593                     | 42255                     | No           |
| LG3BP               | STHTLDLSR        | Yes               | 343.85                 | 490.3                 | 8.72                        | 45.4                      | 18.1                | 104379                          | 40109                     | 21212                     | No           |
| LG3BP               | STHTLDLSR        | Yes               | 343.85                 | 655.3                 | 8.72                        | 45.4                      | 12.1                | 18611                           | 8512                      | 4854                      | No           |
| LG3BP               | VEIFYR           | Yes               | 413.73                 | 338.2                 | 13.15                       | 54.4                      | 23.7                | 17352                           | 87391                     | 57119                     | No           |
| LG3BP               | VEIFYR           | Yes               | 413.73                 | 485.3                 | 13.15                       | 54.4                      | 20.7                | 43469                           | 270184                    | 145630                    | No           |
| LG3BP               | VEIFYR           | Yes               | 413.73                 | 598.3                 | 13.15                       | 54.4                      | 20.7                | 84212                           | 553115                    | 281282                    | No           |
| LG3BP               | VEIFYR           | Yes               | 413.73                 | 727.4                 | 13.15                       | 54.4                      | 29.7                | 19449                           | 96362                     | 43018                     | No           |
| LG3BP               | YSSDYFQAPSDYR    | Yes               | 799.84                 | 637.3                 | 13.84                       | 104.2                     | 37.7                | 69372                           | 89355                     | 50893                     | No           |
| LG3BP               | YSSDYFQAPSDYR    | Yes               | 799.84                 | 708.3                 | 13.84                       | 104.2                     | 40.7                | 48250                           | 68355                     | 35509                     | No           |
| LG3BP               | YSSDYFQAPSDYR    | Yes               | 799.84                 | 836.4                 | 13.84                       | 104.2                     | 37.7                | 36624                           | 32633                     | 28911                     | No           |
| LG3BP               | YSSDYFQAPSDYR    | Yes               | 799.84                 | 983.5                 | 13.84                       | 104.2                     | 37.7                | 26559                           | 28215                     | 22605                     | No           |
| LPLC3               | AQLAPSATK        | Yes               | 443.75                 | 313.2                 | 6.51                        | 58.2                      | 19                  | 181006                          | ND                        | ND                        | No           |
| LPLC3               | AQLAPSATK        | Yes               | 443.75                 | 503.3                 | 6.51                        | 58.2                      | 31                  | 396390                          | ND                        | ND                        | No           |
| LPLC3               | AQLAPSATK        | Yes               | 443.75                 | 574.3                 | 6.51                        | 58.2                      | 22                  | 283578                          | ND                        | ND                        | No           |
| LPLC3               | AQLAPSATK        | Yes               | 443.75                 | 687.4                 | 6.51                        | 58.2                      | 22                  | 493503                          | ND                        | ND                        | No           |
| LPLC3               | LEEWLSHVVGAVYAPK | Yes               | 599.99                 | 315.2                 | 21.32                       | 78.4                      | 37.1                | 14987                           | ND                        | ND                        | No           |
| LPLC3               | LEEWLSHVVGAVYAPK | Yes               | 599.99                 | 705.4                 | 21.32                       | 78.4                      | 25.1                | 19688                           | ND                        | ND                        | No           |
| LPLC3               | LEEWLSHVVGAVYAPK | Yes               | 599.99                 | 804.5                 | 21.32                       | 78.4                      | 28.1                | 14958                           | ND                        | ND                        | No           |
| LPLC3               | LEEWLSHVVGAVYAPK | Yes               | 599.99                 | 903.5                 | 21.32                       | 78.4                      | 28.1                | 4215                            | ND                        | ND                        | No           |
| LPLC3               | LINVALDVGIPLPK   | Yes               | 674.91                 | 454.3                 | 20.58                       | 88.1                      | 38.2                | 66477                           | ND                        | ND                        | No           |
| LPLC3               | LINVALDVGIPLPK   | Yes               | 674.91                 | 624.4                 | 20.58                       | 88.1                      | 29.2                | 33271                           | ND                        | ND                        | No           |
| LPLC3               | LINVALDVGIPLPK   | Yes               | 674.91                 | 838.5                 | 20.58                       | 88.1                      | 32.2                | 43288                           | ND                        | ND                        | No           |
| LPLC3               | LINVALDVGIPLPK   | Yes               | 674.91                 | 951.6                 | 20.58                       | 88.1                      | 29.2                | 27106                           | ND                        | ND                        | No           |

**Table S5.** MRM assay of individual proteins.

| Protein<br>(_HUMAN) | Peptide                  | MS/MS<br>spectrum | Precursor ion<br>(m/z) | Fragment ion<br>(m/z) | Retention time<br>(minutes) | Declustering<br>potential | Collision<br>energy | Area of<br>synthetic<br>peptide | Area in control<br>sample | Area in disease<br>sample | Interference                           |
|---------------------|--------------------------|-------------------|------------------------|-----------------------|-----------------------------|---------------------------|---------------------|---------------------------------|---------------------------|---------------------------|----------------------------------------|
| LPLC3               | SVAGDIIDFPK              | Yes               | 581.31                 | 506.3                 | 17.97                       | 76                        | 37.1                | 77332                           | ND                        | ND                        | No                                     |
| LPLC3               | SVAGDIIDFPK              | Yes               | 581.31                 | 619.3                 | 17.97                       | 76                        | 28.1                | 70252                           | ND                        | ND                        | No                                     |
| LPLC3               | SVAGDIIDFPK              | Yes               | 581.31                 | 904.5                 | 17.97                       | 76                        | 28.1                | 50297                           | ND                        | ND                        | No                                     |
| LPLC3               | SVAGDIIDFPK              | Yes               | 581.31                 | 975.5                 | 17.97                       | 76                        | 28.1                | 126670                          | ND                        | ND                        | No                                     |
| LPLC3               | VLNINFSNSVLEIVENAVVLTVAS | No                |                        |                       |                             |                           |                     |                                 |                           |                           |                                        |
| LPLC4               | GLLPNLVDNLVNR            | Yes               | 718.91                 | 501.3                 | 22.90                       | 93.7                      | 43.1                | 2956                            | 62357                     | 62953                     | Yes (Based on<br>Transition<br>Ratios) |
| LPLC4               | GLLPNLVDNLVNR            | Yes               | 718.91                 | 615.4                 | 22.90                       | 93.7                      | 43.1                | 9116                            | 12773                     | 15366                     | No                                     |
| LPLC4               | GLLPNLVDNLVNR            | Yes               | 718.91                 | 829.5                 | 22.90                       | 93.7                      | 37.1                | 11589                           | 22285                     | 20208                     | No                                     |
| LPLC4               | GLLPNLVDNLVNR            | Yes               | 718.91                 | 942.5                 | 22.90                       | 93.7                      | 40.1                | 4020                            | 5291                      | 6093                      | No                                     |
| LPLC4               | ILNIDFSNADIDVLEDLLVLSA   | No                |                        |                       |                             |                           |                     |                                 |                           |                           |                                        |
| LPLC4               | IVELTLPR                 | Yes               | 470.8                  | 342.2                 | 16.08                       | 61.7                      | 23.2                | 32311                           | ND                        | ND                        | No                                     |
| LPLC4               | IVELTLPR                 | Yes               | 470.8                  | 599.4                 | 16.08                       | 61.7                      | 32.2                | 25665                           | ND                        | ND                        | No                                     |
| LPLC4               | IVELTLPR                 | Yes               | 470.8                  | 728.4                 | 16.08                       | 61.7                      | 26.2                | 77373                           | ND                        | ND                        | No                                     |
| LPLC4               | IVELTLPR                 | Yes               | 470.8                  | 827.5                 | 16.08                       | 61.7                      | 23.2                | 3861                            | ND                        | ND                        | No                                     |
| LPLC4               | LLPGVGVYLSLYTR           | Yes               | 775.95                 | 439.2                 | 24.03                       | 101.1                     | 39.6                | 3860                            | ND                        | ND                        | No                                     |
| LPLC4               | LLPGVGVYLSLYTR           | Yes               | 775.95                 | 639.3                 | 24.03                       | 101.1                     | 45.6                | 5641                            | ND                        | ND                        | No                                     |
| LPLC4               | LLPGVGVYLSLYTR           | Yes               | 775.95                 | 752.4                 | 24.03                       | 101.1                     | 33.6                | ND                              | ND                        | ND                        | No                                     |
| LPLC4               | LLPGVGVYLSLYTR           | Yes               | 775.95                 | 915.5                 | 24.03                       | 101.1                     | 45.6                | 8726                            | ND                        | ND                        | No                                     |
| LPLC4               | YGEILESEGSIR             | Yes               | 676.84                 | 350.1                 | 13.60                       | 88.3                      | 35.3                | 134141                          | ND                        | ND                        | No                                     |
| LPLC4               | YGEILESEGSIR             | Yes               | 676.84                 | 463.2                 | 13.60                       | 88.3                      | 32.3                | 45772                           | ND                        | ND                        | No                                     |
| LPLC4               | YGEILESEGSIR             | Yes               | 676.84                 | 561.3                 | 13.60                       | 88.3                      | 32.3                | 16433                           | ND                        | ND                        | No                                     |
| LPLC4               | YGEILESEGSIR             | Yes               | 676.84                 | 890.5                 | 13.60                       | 88.3                      | 38.3                | 82912                           | ND                        | ND                        | No                                     |



**Table S5.** MRM assay of individual proteins.

| Protein<br>(_HUMAN) | Peptide                | MS/MS<br>spectrum | Precursor ion<br>(m/z) | Fragment ion<br>(m/z) | Retention time<br>(minutes) | Declustering<br>potential | Collision<br>energy | Area of<br>synthetic<br>peptide | Area in control<br>sample | Area in disease<br>sample | Interference |
|---------------------|------------------------|-------------------|------------------------|-----------------------|-----------------------------|---------------------------|---------------------|---------------------------------|---------------------------|---------------------------|--------------|
| LPPRC               | DAGIEPGPDTYLALLNAYA EK | Yes               | 1111.06                | 357.2                 | 24.07                       | 144.3                     | 48.4                | 27977                           | ND                        | ND                        | No           |
| LPPRC               | DAGIEPGPDTYLALLNAYA EK | Yes               | 1111.06                | 486.2                 | 24.07                       | 144.3                     | 48.4                | 31675                           | ND                        | ND                        | No           |
| LPPRC               | DAGIEPGPDTYLALLNAYA EK | Yes               | 1111.06                | 921.5                 | 24.07                       | 144.3                     | 60.4                | 12513                           | ND                        | ND                        | No           |
| LPPRC               | DAGIEPGPDTYLALLNAYA EK | Yes               | 1111.06                | 992.5                 | 24.07                       | 144.3                     | 57.4                | 14151                           | ND                        | ND                        | No           |
| LPPRC               | NVQGIIEILK             | Yes               | 376.23                 | 260.2                 | 20.11                       | 49.5                      | 25.7                | 4671                            | ND                        | ND                        | No           |
| LPPRC               | NVQGIIEILK             | Yes               | 376.23                 | 342.2                 | 20.11                       | 49.5                      | 13.7                | ND                              | ND                        | ND                        | No           |
| LPPRC               | NVQGIIEILK             | Yes               | 376.23                 | 399.2                 | 20.11                       | 49.5                      | 13.7                | 1101                            | ND                        | ND                        | No           |
| LPPRC               | NVQGIIEILK             | Yes               | 376.23                 | 502.3                 | 20.11                       | 49.5                      | 16.7                | 1878                            | ND                        | ND                        | No           |
| LPPRC               | SGGLGGSHALLLR          | Yes               | 450.93                 | 401.3                 | 17.16                       | 59.2                      | 29.5                | 50835                           | ND                        | ND                        | No           |
| LPPRC               | SGGLGGSHALLLR          | Yes               | 450.93                 | 514.4                 | 17.16                       | 59.2                      | 29.5                | 60806                           | ND                        | ND                        | No           |
| LPPRC               | SGGLGGSHALLLR          | Yes               | 450.93                 | 627.5                 | 17.16                       | 59.2                      | 26.5                | 74755                           | ND                        | ND                        | No           |
| LPPRC               | SGGLGGSHALLLR          | Yes               | 450.93                 | 698.5                 | 17.16                       | 59.2                      | 26.5                | 89945                           | ND                        | ND                        | No           |
| LPPRC               | TVLDQQQTPSR            | Yes               | 636.83                 | 359.2                 | 7.75                        | 83.2                      | 33.5                | 50717                           | ND                        | ND                        | No           |
| LPPRC               | TVLDQQQTPSR            | Yes               | 636.83                 | 460.3                 | 7.75                        | 83.2                      | 30.5                | 18077                           | ND                        | ND                        | No           |
| LPPRC               | TVLDQQQTPSR            | Yes               | 636.83                 | 844.4                 | 7.75                        | 83.2                      | 39.5                | 12496                           | ND                        | ND                        | No           |
| LPPRC               | TVLDQQQTPSR            | Yes               | 636.83                 | 959.5                 | 7.75                        | 83.2                      | 30.5                | 14823                           | ND                        | ND                        | No           |
| LPPRC               | TVQLTSSELESTLET LK     | Yes               | 940                    | 329.2                 | 21.16                       | 122.3                     | 43.9                | 9934                            | ND                        | ND                        | No           |
| LPPRC               | TVQLTSSELESTLET LK     | Yes               | 940                    | 442.3                 | 21.16                       | 122.3                     | 40.9                | 3253                            | ND                        | ND                        | No           |
| LPPRC               | TVQLTSSELESTLET LK     | Yes               | 940                    | 490.3                 | 21.16                       | 122.3                     | 46.9                | 2436                            | ND                        | ND                        | No           |
| LPPRC               | TVQLTSSELESTLET LK     | Yes               | 940                    | 791.5                 | 21.16                       | 122.3                     | 40.9                | 3885                            | ND                        | ND                        | No           |
| LRP1                | AALSGANVLT LIEK        | Yes               | 700.4                  | 1057.6                | 22.80                       | 100                       | 36.3                | ND                              | ND                        | ND                        | No           |
| LRP1                | AALSGANVLT LIEK        | Yes               | 700.4                  | 1144.7                | 22.80                       | 100                       | 36.3                | ND                              | ND                        | ND                        | No           |
| LRP1                | AALSGANVLT LIEK        | Yes               | 700.4                  | 716.5                 | 22.80                       | 100                       | 36.3                | ND                              | ND                        | ND                        | No           |

**Table S5.** MRM assay of individual proteins.

| Protein<br>(_HUMAN) | Peptide               | MS/MS<br>spectrum | Precursor ion<br>(m/z) | Fragment ion<br>(m/z) | Retention time<br>(minutes) | Declustering<br>potential | Collision<br>energy | Area of<br>synthetic<br>peptide | Area in control<br>sample | Area in disease<br>sample | Interference                           |
|---------------------|-----------------------|-------------------|------------------------|-----------------------|-----------------------------|---------------------------|---------------------|---------------------------------|---------------------------|---------------------------|----------------------------------------|
| LRP1                | AALSGANVLTLEIK        | Yes               | 700.4                  | 929.6                 | 22.80                       | 100                       | 36.3                | ND                              | ND                        | ND                        | No                                     |
| LRP1                | TVLWPNGLSLDIPAGR      | Yes               | 854.972                | 1209.7                | 21.11                       | 100                       | 43.1                | ND                              | 8174                      | 4835                      | No                                     |
| LRP1                | TVLWPNGLSLDIPAGR      | Yes               | 854.972                | 400.231               | 21.11                       | 100                       | 37.1                | ND                              | 166746                    | 59574                     | No                                     |
| LRP1                | TVLWPNGLSLDIPAGR      | Yes               | 854.972                | 500.3                 | 21.11                       | 100                       | 43.1                | ND                              | 15454                     | 11382                     | No                                     |
| LRP1                | TVLWPNGLSLDIPAGR      | Yes               | 854.972                | 605.333               | 21.11                       | 100                       | 43.1                | ND                              | 30940                     | 18227                     | No                                     |
| LRP1                | VFFTDYGQIPK           | Yes               | 657.84                 | 1068.54               | 16.06                       | 100                       | 28.4                | ND                              | 9497                      | 10537                     | No                                     |
| LRP1                | VFFTDYGQIPK           | Yes               | 657.84                 | 244.2                 | 16.06                       | 100                       | 34.4                | ND                              | ND                        | ND                        | No                                     |
| LRP1                | VFFTDYGQIPK           | Yes               | 657.84                 | 820.4                 | 16.06                       | 100                       | 34.4                | ND                              | 9479                      | 5914                      | No                                     |
| LRP1                | VFFTDYGQIPK           | Yes               | 657.84                 | 921.468               | 16.06                       | 100                       | 28.4                | ND                              | 11791                     | 11505                     | No                                     |
| LUM                 | LPSGLPVSLTLYLDNNK     | No                |                        |                       |                             |                           |                     |                                 |                           |                           |                                        |
| LUM                 | NIPTVNENLENYYLEVNQLEK | Yes               | 846.09                 | 517.3                 | 21.16                       | 110.1                     | 49.7                | 3641                            | 52183                     | 66686                     | Yes (Based on<br>Transition<br>Ratios) |
| LUM                 | NIPTVNENLENYYLEVNQLEK | Yes               | 846.09                 | 631.3                 | 21.16                       | 110.1                     | 40.7                | 4560                            | 218572                    | 201687                    | No                                     |
| LUM                 | NIPTVNENLENYYLEVNQLEK | Yes               | 846.09                 | 730.4                 | 21.16                       | 110.1                     | 43.7                | 3742                            | 200882                    | 182907                    | No                                     |
| LUM                 | NIPTVNENLENYYLEVNQLEK | Yes               | 846.09                 | 972.5                 | 21.16                       | 110.1                     | 40.7                | 3898                            | 231659                    | 220149                    | No                                     |
| LUM                 | NNQIDHIDEK            | Yes               | 409.2                  | 276.2                 | 7.44                        | 53.8                      | 24.4                | 105424                          | 264912                    | 244943                    | No                                     |
| LUM                 | NNQIDHIDEK            | Yes               | 409.2                  | 504.3                 | 7.44                        | 53.8                      | 27.4                | 17958                           | 41787                     | 36561                     | No                                     |
| LUM                 | NNQIDHIDEK            | Yes               | 409.2                  | 756.4                 | 7.44                        | 53.8                      | 21.4                | 7836                            | 26246                     | 15348                     | No                                     |
| LUM                 | NNQIDHIDEK            | Yes               | 409.2                  | 869.4                 | 7.44                        | 53.8                      | 27.4                | ND                              | ND                        | ND                        | No                                     |
| LUM                 | SLEDLQLTHNK           | Yes               | 433.23                 | 398.2                 | 12.04                       | 56.9                      | 25.6                | 52207                           | 359476                    | 342909                    | No                                     |
| LUM                 | SLEDLQLTHNK           | Yes               | 433.23                 | 499.3                 | 12.04                       | 56.9                      | 22.6                | 44358                           | 411092                    | 358230                    | No                                     |
| LUM                 | SLEDLQLTHNK           | Yes               | 433.23                 | 612.3                 | 12.04                       | 56.9                      | 22.6                | 30311                           | 311966                    | 279144                    | No                                     |
| LUM                 | SLEDLQLTHNK           | Yes               | 433.23                 | 740.4                 | 12.04                       | 56.9                      | 28.6                | 7885                            | 53248                     | 65875                     | No                                     |

**Table S5.** MRM assay of individual proteins.

| Protein<br>(_HUMAN) | Peptide        | MS/MS<br>spectrum | Precursor ion<br>(m/z) | Fragment ion<br>(m/z) | Retention time<br>(minutes) | Declustering<br>potential | Collision<br>energy | Area of<br>synthetic<br>peptide | Area in control<br>sample | Area in disease<br>sample | Interference                           |
|---------------------|----------------|-------------------|------------------------|-----------------------|-----------------------------|---------------------------|---------------------|---------------------------------|---------------------------|---------------------------|----------------------------------------|
| LUM                 | SLEYLDLSFNQIAR | Yes               | 834.93                 | 330.2                 | 21.78                       | 108.7                     | 42.2                | 7204                            | 2226673                   | 1964607                   | Yes (Based on<br>Transition<br>Ratios) |
| LUM                 | SLEYLDLSFNQIAR | Yes               | 834.93                 | 601.3                 | 21.78                       | 108.7                     | 48.2                | 3311                            | 460676                    | 436255                    | Yes (Based on<br>Transition<br>Ratios) |
| LUM                 | SLEYLDLSFNQIAR | Yes               | 834.93                 | 748.4                 | 21.78                       | 108.7                     | 42.2                | 4021                            | 959380                    | 841757                    | Yes (Based on<br>Transition<br>Ratios) |
| LUM                 | SLEYLDLSFNQIAR | Yes               | 834.93                 | 948.5                 | 21.78                       | 108.7                     | 42.2                | 3014                            | 762620                    | 733922                    | Yes (Based on<br>Transition<br>Ratios) |
| LY6K                | DPEDSQR        | Yes               | 423.68                 | 342.1                 | 5.30                        | 55.7                      | 21.1                | 7653                            | ND                        | ND                        | No                                     |
| LY6K                | DPEDSQR        | Yes               | 423.68                 | 390.2                 | 5.30                        | 55.7                      | 30.1                | 18729                           | ND                        | 544                       | No                                     |
| LY6K                | DPEDSQR        | Yes               | 423.68                 | 505.2                 | 5.30                        | 55.7                      | 27.1                | 17624                           | ND                        | 834                       | No                                     |
| LY6K                | DPEDSQR        | Yes               | 423.68                 | 634.3                 | 5.30                        | 55.7                      | 30.1                | 19303                           | ND                        | ND                        | No                                     |
| LY6K                | TDEGDNR        | Yes               | 403.67                 | 289.2                 | 5.59                        | 53.1                      | 20.3                | ND                              | ND                        | ND                        |                                        |
| LY6K                | TDEGDNR        | Yes               | 403.67                 | 461.2                 | 5.59                        | 53.1                      | 20.3                | ND                              | ND                        | ND                        |                                        |
| LY6K                | TDEGDNR        | Yes               | 403.67                 | 590.3                 | 5.59                        | 53.1                      | 20.3                | ND                              | ND                        | ND                        |                                        |
| LY6K                | TDEGDNR        | Yes               | 403.67                 | 705.3                 | 5.59                        | 53.1                      | 23.3                | ND                              | ND                        | ND                        |                                        |
| LY6K                | VWTDANLTAR     | Yes               | 573.8                  | 286.2                 | 12.56                       | 75                        | 27.7                | 65045                           | ND                        | ND                        | No                                     |
| LY6K                | VWTDANLTAR     | Yes               | 573.8                  | 460.3                 | 12.56                       | 75                        | 27.7                | 7776                            | ND                        | ND                        | No                                     |
| LY6K                | VWTDANLTAR     | Yes               | 573.8                  | 760.4                 | 12.56                       | 75                        | 33.7                | 12057                           | ND                        | ND                        | No                                     |
| LY6K                | VWTDANLTAR     | Yes               | 573.8                  | 861.4                 | 12.56                       | 75                        | 27.7                | 37753                           | ND                        | ND                        | No                                     |
| LYAM2               | NWAPGEPNNR     | Yes               | 577.77                 | 301.1                 | 8.90                        | 75.5                      | 24.9                | 91435                           | ND                        | ND                        | No                                     |
| LYAM2               | NWAPGEPNNR     | Yes               | 577.77                 | 372.2                 | 8.90                        | 75.5                      | 24.9                | 88736                           | ND                        | ND                        | No                                     |

**Table S5.** MRM assay of individual proteins.

| Protein<br>(_HUMAN) | Peptide      | MS/MS<br>spectrum | Precursor ion<br>(m/z) | Fragment ion<br>(m/z) | Retention time<br>(minutes) | Declustering<br>potential | Collision<br>energy | Area of<br>synthetic<br>peptide | Area in control<br>sample | Area in disease<br>sample | Interference |
|---------------------|--------------|-------------------|------------------------|-----------------------|-----------------------------|---------------------------|---------------------|---------------------------------|---------------------------|---------------------------|--------------|
| LYAM2               | NWAPGEPNNR   | Yes               | 577.77                 | 783.4                 | 8.90                        | 75.5                      | 27.9                | 99497                           | ND                        | ND                        | No           |
| LYAM2               | NWAPGEPNNR   | Yes               | 577.77                 | 854.4                 | 8.90                        | 75.5                      | 27.9                | 22249                           | ND                        | ND                        | No           |
| LYAM2               | QPQNGSVR     | Yes               | 443.23                 | 361.2                 | 5.37                        | 58.2                      | 25                  | 2688                            | ND                        | ND                        | No           |
| LYAM2               | QPQNGSVR     | Yes               | 443.23                 | 418.2                 | 5.37                        | 58.2                      | 31                  | 4725                            | ND                        | ND                        | No           |
| LYAM2               | QPQNGSVR     | Yes               | 443.23                 | 532.3                 | 5.37                        | 58.2                      | 22                  | 3171                            | ND                        | ND                        | No           |
| LYAM2               | QPQNGSVR     | Yes               | 443.23                 | 660.3                 | 5.37                        | 58.2                      | 31                  | 2517                            | ND                        | ND                        | No           |
| LYAM2               | YTHLVAIQNK   | Yes               | 396.22                 | 502.3                 | 9.62                        | 52.1                      | 17.8                | 130444                          | ND                        | 2813                      | No           |
| LYAM2               | YTHLVAIQNK   | Yes               | 396.22                 | 515.3                 | 9.62                        | 52.1                      | 17.8                | 81145                           | ND                        | ND                        | No           |
| LYAM2               | YTHLVAIQNK   | Yes               | 396.22                 | 573.3                 | 9.62                        | 52.1                      | 17.8                | 215425                          | 3408                      | 7990                      | No           |
| LYAM2               | YTHLVAIQNK   | Yes               | 396.22                 | 685.4                 | 9.62                        | 52.1                      | 17.8                | 76545                           | 2723                      | 1413                      | No           |
| LYAM3               | EVAAWTYHYSTK | Yes               | 485.9                  | 335.2                 | 12.48                       | 63.7                      | 31.3                | 25418                           | ND                        | ND                        | No           |
| LYAM3               | EVAAWTYHYSTK | Yes               | 485.9                  | 635.3                 | 12.48                       | 63.7                      | 31.3                | 11064                           | ND                        | ND                        | No           |
| LYAM3               | EVAAWTYHYSTK | Yes               | 485.9                  | 798.4                 | 12.48                       | 63.7                      | 31.3                | 12250                           | ND                        | ND                        | No           |
| LYAM3               | EVAAWTYHYSTK | Yes               | 485.9                  | 899.4                 | 12.48                       | 63.7                      | 31.3                | 8269                            | ND                        | ND                        | No           |
| LYAM3               | NEIDYLNK     | Yes               | 504.75                 | 261.2                 | 11.00                       | 66.1                      | 33.7                | 82723                           | ND                        | ND                        | No           |
| LYAM3               | NEIDYLNK     | Yes               | 504.75                 | 537.3                 | 11.00                       | 66.1                      | 30.7                | 15041                           | ND                        | ND                        | No           |
| LYAM3               | NEIDYLNK     | Yes               | 504.75                 | 652.3                 | 11.00                       | 66.1                      | 24.7                | 29335                           | ND                        | ND                        | No           |
| LYAM3               | NEIDYLNK     | Yes               | 504.75                 | 765.4                 | 11.00                       | 66.1                      | 24.7                | 49728                           | ND                        | ND                        | No           |
| LYAM3               | YTDLVAIQNK   | Yes               | 582.82                 | 380.1                 | 12.20                       | 76.2                      | 28.1                | 22399                           | ND                        | ND                        | No           |
| LYAM3               | YTDLVAIQNK   | Yes               | 582.82                 | 672.4                 | 12.20                       | 76.2                      | 28.1                | 15775                           | ND                        | ND                        | No           |
| LYAM3               | YTDLVAIQNK   | Yes               | 582.82                 | 785.5                 | 12.20                       | 76.2                      | 28.1                | 5433                            | ND                        | ND                        | No           |
| LYAM3               | YTDLVAIQNK   | Yes               | 582.82                 | 900.5                 | 12.20                       | 76.2                      | 28.1                | 9707                            | ND                        | ND                        | No           |
| LYOX                | HWFQAGYSTSR  | Yes               | 447.21                 | 324.1                 | 11.68                       | 58.7                      | 26.4                | 24639                           | ND                        | ND                        | No           |

**Table S5.** MRM assay of individual proteins.

| Protein<br>(_HUMAN) | Peptide                           | MS/MS<br>spectrum | Precursor ion<br>(m/z) | Fragment ion<br>(m/z) | Retention time<br>(minutes) | Declustering<br>potential | Collision<br>energy | Area of<br>synthetic<br>peptide | Area in control<br>sample | Area in disease<br>sample | Interference |
|---------------------|-----------------------------------|-------------------|------------------------|-----------------------|-----------------------------|---------------------------|---------------------|---------------------------------|---------------------------|---------------------------|--------------|
| LYOX                | HWFQAGYSTSR                       | Yes               | 447.21                 | 363.2                 | 11.68                       | 58.7                      | 20.4                | 13915                           | ND                        | ND                        | No           |
| LYOX                | HWFQAGYSTSR                       | Yes               | 447.21                 | 613.3                 | 11.68                       | 58.7                      | 20.4                | 7609                            | ND                        | ND                        | No           |
| LYOX                | HWFQAGYSTSR                       | Yes               | 447.21                 | 727.3                 | 11.68                       | 58.7                      | 20.4                | 8570                            | ND                        | ND                        | No           |
| LYOX                | NQGTSDFLPSRPR                     | Yes               | 737.87                 | 272.2                 | 11.04                       | 96.2                      | 41                  | 11495                           | ND                        | ND                        | No           |
| LYOX                | NQGTSDFLPSRPR                     | Yes               | 737.87                 | 603.2                 | 11.04                       | 96.2                      | 44                  | 4649                            | ND                        | ND                        | No           |
| LYOX                | NQGTSDFLPSRPR                     | Yes               | 737.87                 | 612.4                 | 11.04                       | 96.2                      | 44                  | 10648                           | ND                        | ND                        | No           |
| LYOX                | NQGTSDFLPSRPR                     | Yes               | 737.87                 | 872.5                 | 11.04                       | 96.2                      | 38                  | 5202                            | ND                        | ND                        | No           |
| LYOX                | TPILLIR                           | Yes               | 413.28                 | 288.2                 | 16.41                       | 54.3                      | 29.7                | ND                              | ND                        | ND                        | No           |
| LYOX                | TPILLIR                           | Yes               | 413.28                 | 514.4                 | 16.41                       | 54.3                      | 23.7                | 45132                           | ND                        | ND                        | No           |
| LYOX                | TPILLIR                           | Yes               | 413.28                 | 627.5                 | 16.41                       | 54.3                      | 29.7                | 23694                           | ND                        | ND                        | No           |
| LYOX                | TPILLIR                           | Yes               | 413.28                 | 724.5                 | 16.41                       | 54.3                      | 20.7                | 4756                            | ND                        | ND                        | No           |
| LYOX                | VSVNPSYLVPESDYTNNVVR              | Yes               | 751.38                 | 702.4                 | 17.17                       | 97.9                      | 35.9                | 18908                           | ND                        | ND                        | No           |
| LYOX                | VSVNPSYLVPESDYTNNVVR              | Yes               | 751.38                 | 860.5                 | 17.17                       | 97.9                      | 35.9                | 9758                            | ND                        | ND                        | No           |
| LYOX                | VSVNPSYLVPESDYTNNVVR              | Yes               | 751.38                 | 865.5                 | 17.17                       | 97.9                      | 44.9                | 15247                           | ND                        | ND                        | No           |
| LYOX                | VSVNPSYLVPESDYTNNVVR              | Yes               | 751.38                 | 959.5                 | 17.17                       | 97.9                      | 32.9                | 9636                            | ND                        | ND                        | No           |
| LYOX                | YRPGYGTGYFQYGLPDLVADPYIYIQAASYVQK | No                |                        |                       |                             |                           |                     |                                 |                           |                           |              |
| LYPD3               | GGPQQPHNK                         | Yes               | 481.74                 | 261.2                 | 5.25                        | 63.1                      | 29.7                | 18379                           | ND                        | ND                        | No           |
| LYPD3               | GGPQQPHNK                         | Yes               | 481.74                 | 623.3                 | 5.25                        | 63.1                      | 26.7                | 4401                            | ND                        | ND                        | No           |
| LYPD3               | GGPQQPHNK                         | Yes               | 481.74                 | 702.3                 | 5.25                        | 63.1                      | 23.7                | 2579                            | ND                        | ND                        | No           |
| LYPD3               | GGPQQPHNK                         | Yes               | 481.74                 | 848.4                 | 5.25                        | 63.1                      | 29.7                | 1785                            | ND                        | ND                        | No           |
| LYPD3               | LNLTSR                            | Yes               | 352.21                 | 262.2                 | 8.82                        | 46.4                      | 18                  | 39393                           | ND                        | ND                        | No           |
| LYPD3               | LNLTSR                            | Yes               | 352.21                 | 442.3                 | 8.82                        | 46.4                      | 15                  | 2617                            | ND                        | ND                        | No           |
| LYPD3               | LNLTSR                            | Yes               | 352.21                 | 476.3                 | 8.82                        | 46.4                      | 18                  | 64140                           | ND                        | ND                        | No           |

**Table S5.** MRM assay of individual proteins.

| Protein<br>(_HUMAN) | Peptide                   | MS/MS<br>spectrum | Precursor ion<br>(m/z) | Fragment ion<br>(m/z) | Retention time<br>(minutes) | Decustering<br>potential | Collision<br>energy | Area of<br>synthetic<br>peptide | Area in control<br>sample | Area in disease<br>sample | Interference |
|---------------------|---------------------------|-------------------|------------------------|-----------------------|-----------------------------|--------------------------|---------------------|---------------------------------|---------------------------|---------------------------|--------------|
| LYPD3               | LNLTSR                    | Yes               | 352.21                 | 590.3                 | 8.82                        | 46.4                     | 18                  | 36783                           | ND                        | ND                        | No           |
| LYPD3               | LTGGAAGHQDR               | Yes               | 541.77                 | 612.3                 | 5.34                        | 70.9                     | 35.3                | 17776                           | ND                        | ND                        | No           |
| LYPD3               | LTGGAAGHQDR               | Yes               | 541.77                 | 683.3                 | 5.34                        | 70.9                     | 32.3                | 11638                           | ND                        | ND                        | No           |
| LYPD3               | LTGGAAGHQDR               | Yes               | 541.77                 | 868.4                 | 5.34                        | 70.9                     | 26.3                | 18786                           | ND                        | ND                        | No           |
| LYPD3               | LTGGAAGHQDR               | Yes               | 541.77                 | 969.5                 | 5.34                        | 70.9                     | 29.3                | 4076                            | ND                        | ND                        | No           |
| LYPD3               | SNSGQYPAK                 | Yes               | 476.23                 | 315.2                 | 5.50                        | 62.4                     | 29.5                | 153724                          | ND                        | ND                        | No           |
| LYPD3               | SNSGQYPAK                 | Yes               | 476.23                 | 606.3                 | 5.50                        | 62.4                     | 23.5                | 12950                           | ND                        | ND                        | No           |
| LYPD3               | SNSGQYPAK                 | Yes               | 476.23                 | 663.3                 | 5.50                        | 62.4                     | 26.5                | 43279                           | ND                        | ND                        | No           |
| LYPD3               | SNSGQYPAK                 | Yes               | 476.23                 | 750.4                 | 5.50                        | 62.4                     | 23.5                | 116086                          | ND                        | ND                        | No           |
| LYPD3               | TYFSPR                    | Yes               | 385.7                  | 272.2                 | 9.30                        | 50.8                     | 22.5                | 19136                           | ND                        | ND                        | No           |
| LYPD3               | TYFSPR                    | Yes               | 385.7                  | 359.2                 | 9.30                        | 50.8                     | 19.5                | 50476                           | ND                        | ND                        | No           |
| LYPD3               | TYFSPR                    | Yes               | 385.7                  | 506.3                 | 9.30                        | 50.8                     | 19.5                | 215501                          | ND                        | ND                        | No           |
| LYPD3               | TYFSPR                    | Yes               | 385.7                  | 669.3                 | 9.30                        | 50.8                     | 22.5                | 10716                           | ND                        | ND                        | No           |
| MAGA4               | EAALLEEEEGV               | Yes               | 594.79                 | 304.2                 | 15.23                       | 77.7                     | 28.7                | 31519                           | ND                        | ND                        | No           |
| MAGA4               | EAALLEEEEGV               | Yes               | 594.79                 | 385.2                 | 15.23                       | 77.7                     | 28.7                | 32908                           | ND                        | ND                        | No           |
| MAGA4               | EAALLEEEEGV               | Yes               | 594.79                 | 498.3                 | 15.23                       | 77.7                     | 25.7                | 32309                           | ND                        | ND                        | No           |
| MAGA4               | EAALLEEEEGV               | Yes               | 594.79                 | 627.3                 | 15.23                       | 77.7                     | 25.7                | 25125                           | ND                        | ND                        | No           |
| MAGA4               | IAYPSLR                   | Yes               | 410.24                 | 375.2                 | 12.34                       | 53.9                     | 23.6                | ND                              | ND                        | ND                        | No           |
| MAGA4               | IAYPSLR                   | Yes               | 410.24                 | 472.3                 | 12.34                       | 53.9                     | 23.6                | 89709                           | ND                        | ND                        | No           |
| MAGA4               | IAYPSLR                   | Yes               | 410.24                 | 635.4                 | 12.34                       | 53.9                     | 20.6                | 36055                           | ND                        | ND                        | No           |
| MAGA4               | IAYPSLR                   | Yes               | 410.24                 | 706.4                 | 12.34                       | 53.9                     | 20.6                | 19063                           | ND                        | ND                        | No           |
| MAGA4               | QPNEGSSSQEEEGPSTSPDAESLFR | No                |                        |                       |                             |                          |                     |                                 |                           |                           |              |
| MAGA4               | VLEHVVR                   | No                |                        |                       |                             |                          |                     |                                 |                           |                           |              |

**Table S5.** MRM assay of individual proteins.

| Protein<br>(_HUMAN) | Peptide                   | MS/MS<br>spectrum | Precursor ion<br>(m/z) | Fragment ion<br>(m/z) | Retention time<br>(minutes) | Declustering<br>potential | Collision<br>energy | Area of<br>synthetic<br>peptide | Area in control<br>sample | Area in disease<br>sample | Interference |
|---------------------|---------------------------|-------------------|------------------------|-----------------------|-----------------------------|---------------------------|---------------------|---------------------------------|---------------------------|---------------------------|--------------|
| MAGA4               | YEFLWGPR                  | Yes               | 534.27                 | 293.1                 | 19.61                       | 69.9                      | 23                  | 139934                          | ND                        | ND                        | No           |
| MAGA4               | YEFLWGPR                  | Yes               | 534.27                 | 329.2                 | 19.61                       | 69.9                      | 23                  | 81067                           | ND                        | ND                        | No           |
| MAGA4               | YEFLWGPR                  | Yes               | 534.27                 | 628.4                 | 19.61                       | 69.9                      | 29                  | 32050                           | ND                        | ND                        | No           |
| MAGA4               | YEFLWGPR                  | Yes               | 534.27                 | 775.4                 | 19.61                       | 69.9                      | 26                  | 115949                          | ND                        | ND                        | No           |
| MASP1               | APEPISTQSHSVLILFHSDNSGENR | No                |                        |                       |                             |                           |                     |                                 |                           |                           |              |
| MASP1               | APGELEHGLITFSTR           | Yes               | 543.29                 | 363.2                 | 16.62                       | 71.1                      | 31.3                | 36430                           | 39596                     | 25550                     | No           |
| MASP1               | APGELEHGLITFSTR           | Yes               | 543.29                 | 510.3                 | 16.62                       | 71.1                      | 34.3                | 46641                           | 32351                     | 47145                     | No           |
| MASP1               | APGELEHGLITFSTR           | Yes               | 543.29                 | 611.3                 | 16.62                       | 71.1                      | 28.3                | 113112                          | 99581                     | 93240                     | No           |
| MASP1               | APGELEHGLITFSTR           | Yes               | 543.29                 | 724.4                 | 16.62                       | 71.1                      | 34.3                | 56143                           | 36735                     | 42148                     | No           |
| MASP1               | DSDLLSPSDFK               | Yes               | 612.29                 | 318.1                 | 16.20                       | 80                        | 29.4                | 1924996                         | ND                        | ND                        | No           |
| MASP1               | DSDLLSPSDFK               | Yes               | 612.29                 | 431.2                 | 16.20                       | 80                        | 29.4                | 836505                          | ND                        | ND                        | No           |
| MASP1               | DSDLLSPSDFK               | Yes               | 612.29                 | 680.3                 | 16.20                       | 80                        | 29.4                | 1435521                         | ND                        | ND                        | No           |
| MASP1               | DSDLLSPSDFK               | Yes               | 612.29                 | 793.4                 | 16.20                       | 80                        | 29.4                | 1052588                         | ND                        | ND                        | No           |
| MASP1               | SDENEQHLGVK               | Yes               | 628.3                  | 303.2                 | 6.73                        | 82.1                      | 33.1                | 63611                           | ND                        | ND                        | No           |
| MASP1               | SDENEQHLGVK               | Yes               | 628.3                  | 416.3                 | 6.73                        | 82.1                      | 39.1                | 44759                           | ND                        | ND                        | No           |
| MASP1               | SDENEQHLGVK               | Yes               | 628.3                  | 553.3                 | 6.73                        | 82.1                      | 39.1                | 38455                           | ND                        | ND                        | No           |
| MASP1               | SDENEQHLGVK               | Yes               | 628.3                  | 924.5                 | 6.73                        | 82.1                      | 30.1                | 16918                           | ND                        | ND                        | No           |
| MASP1               | TGVITSPDFPNYPK            | Yes               | 816.92                 | 258.1                 | 15.73                       | 106.4                     | 38.4                | 727424                          | 1103949                   | 902990                    | No           |
| MASP1               | TGVITSPDFPNYPK            | Yes               | 816.92                 | 504.3                 | 15.73                       | 106.4                     | 47.4                | 139749                          | 206259                    | 190205                    | No           |
| MASP1               | TGVITSPDFPNYPK            | Yes               | 816.92                 | 715.4                 | 15.73                       | 106.4                     | 44.4                | 144683                          | 223602                    | 202212                    | No           |
| MASP1               | TGVITSPDFPNYPK            | Yes               | 816.92                 | 862.4                 | 15.73                       | 106.4                     | 47.4                | 109708                          | 153710                    | 131787                    | No           |
| MDHC                | ESAFEFLSSA                | No                |                        |                       |                             |                           |                     |                                 |                           |                           |              |
| MDHC                | GEFVTTVQQR                | Yes               | 582.8                  | 431.2                 | 10.20                       | 76.2                      | 28.1                | 4812                            | ND                        | ND                        | No           |

**Table S5.** MRM assay of individual proteins.

| Protein<br>(_HUMAN) | Peptide                    | MS/MS<br>spectrum | Precursor ion<br>(m/z) | Fragment ion<br>(m/z) | Retention time<br>(minutes) | Declustering<br>potential | Collision<br>energy | Area of<br>synthetic<br>peptide | Area in control<br>sample | Area in disease<br>sample | Interference                           |
|---------------------|----------------------------|-------------------|------------------------|-----------------------|-----------------------------|---------------------------|---------------------|---------------------------------|---------------------------|---------------------------|----------------------------------------|
| MDHC                | GEFVTTVQQR                 | Yes               | 582.8                  | 631.4                 | 10.20                       | 76.2                      | 25.1                | 4454                            | ND                        | ND                        | No                                     |
| MDHC                | GEFVTTVQQR                 | Yes               | 582.8                  | 732.4                 | 10.20                       | 76.2                      | 28.1                | 12877                           | ND                        | ND                        | No                                     |
| MDHC                | GEFVTTVQQR                 | Yes               | 582.8                  | 831.5                 | 10.20                       | 76.2                      | 37.1                | 2953                            | ND                        | ND                        | No                                     |
| MDHC                | LGVTANDVK                  | Yes               | 458.76                 | 546.3                 | 8.83                        | 60.2                      | 22.7                | 141263                          | ND                        | ND                        | No                                     |
| MDHC                | LGVTANDVK                  | Yes               | 458.76                 | 647.3                 | 8.83                        | 60.2                      | 22.7                | 324542                          | ND                        | ND                        | No                                     |
| MDHC                | LGVTANDVK                  | Yes               | 458.76                 | 746.4                 | 8.83                        | 60.2                      | 22.7                | 88975                           | ND                        | ND                        | No                                     |
| MDHC                | LGVTANDVK                  | Yes               | 458.76                 | 803.4                 | 8.83                        | 60.2                      | 22.7                | 181219                          | ND                        | ND                        | No                                     |
| MDHC                | NVIIWGNHSSTQYPDVNHAK       | No                |                        |                       |                             |                           |                     |                                 |                           |                           |                                        |
| MDHC                | VLVTGAAGQIAYSLLYSIGNGSVFGK | Yes               | 862.47                 | 351.2                 | 24.71                       | 112.3                     | 50.5                | 21540                           | ND                        | ND                        | No                                     |
| MDHC                | VLVTGAAGQIAYSLLYSIGNGSVFGK | Yes               | 862.47                 | 594.3                 | 24.71                       | 112.3                     | 44.5                | 8105                            | ND                        | ND                        | No                                     |
| MDHC                | VLVTGAAGQIAYSLLYSIGNGSVFGK | Yes               | 862.47                 | 765.4                 | 24.71                       | 112.3                     | 38.5                | 34614                           | ND                        | ND                        | No                                     |
| MDHC                | VLVTGAAGQIAYSLLYSIGNGSVFGK | Yes               | 862.47                 | 965.5                 | 24.71                       | 112.3                     | 41.5                | 12905                           | ND                        | ND                        | No                                     |
| MDHM                | LTLYDIAHTPGVAADLSHIETK     | No                |                        |                       |                             |                           |                     |                                 |                           |                           |                                        |
| MDHM                | VAVLGASGGIGQPLSLLLK        | Yes               | 897.05                 | 511.3                 | 24.44                       | 116.7                     | 39                  | 61532                           | ND                        | ND                        | No                                     |
| MDHM                | VAVLGASGGIGQPLSLLLK        | Yes               | 897.05                 | 783.5                 | 24.44                       | 116.7                     | 39                  | 120996                          | ND                        | ND                        | No                                     |
| MDHM                | VAVLGASGGIGQPLSLLLK        | Yes               | 897.05                 | 825.5                 | 24.44                       | 116.7                     | 39                  | 82705                           | ND                        | ND                        | No                                     |
| MDHM                | VAVLGASGGIGQPLSLLLK        | Yes               | 897.05                 | 968.6                 | 24.44                       | 116.7                     | 39                  | 101342                          | ND                        | ND                        | No                                     |
| MDHM                | VDFPQDQLTALTGR             | Yes               | 780.9                  | 333.2                 | 18.20                       | 101.7                     | 36.9                | 19352                           | 10494                     | 10516                     | No                                     |
| MDHM                | VDFPQDQLTALTGR             | Yes               | 780.9                  | 517.3                 | 18.20                       | 101.7                     | 39.9                | 12481                           | 16111                     | 10468                     | No                                     |
| MDHM                | VDFPQDQLTALTGR             | Yes               | 780.9                  | 618.4                 | 18.20                       | 101.7                     | 42.9                | 15848                           | 3453                      | 3966                      | Yes (Based on<br>Transition<br>Ratios) |
| MDHM                | VDFPQDQLTALTGR             | Yes               | 780.9                  | 731.4                 | 18.20                       | 101.7                     | 45.9                | 10874                           | 10382                     | 12236                     | No                                     |
| MDHM                | VNVPVIGGHAGK               | Yes               | 383.22                 | 526.3                 | 11.39                       | 50.4                      | 20.1                | 57546                           | ND                        | ND                        | No                                     |



**Table S5.** MRM assay of individual proteins.

| Protein<br>(_HUMAN) | Peptide             | MS/MS<br>spectrum | Precursor ion<br>(m/z) | Fragment ion<br>(m/z) | Retention time<br>(minutes) | Declustering<br>potential | Collision<br>energy | Area of<br>synthetic<br>peptide | Area in control<br>sample | Area in disease<br>sample | Interference |
|---------------------|---------------------|-------------------|------------------------|-----------------------|-----------------------------|---------------------------|---------------------|---------------------------------|---------------------------|---------------------------|--------------|
| MDHM                | VNVPVIGGHAGK        | Yes               | 383.22                 | 639.4                 | 11.39                       | 50.4                      | 20.1                | 73908                           | ND                        | ND                        | No           |
| MDHM                | VNVPVIGGHAGK        | Yes               | 383.22                 | 738.4                 | 11.39                       | 50.4                      | 26.1                | 16021                           | ND                        | ND                        | No           |
| MDHM                | VNVPVIGGHAGK        | Yes               | 383.22                 | 835.5                 | 11.39                       | 50.4                      | 26.1                | ND                              | ND                        | ND                        | No           |
| MDHM                | VSSFEEK             | Yes               | 413.2                  | 276.2                 | 6.99                        | 54.3                      | 29.7                | 233734                          | ND                        | ND                        | No           |
| MDHM                | VSSFEEK             | Yes               | 413.2                  | 552.3                 | 6.99                        | 54.3                      | 23.7                | 60137                           | ND                        | ND                        | No           |
| MDHM                | VSSFEEK             | Yes               | 413.2                  | 639.3                 | 6.99                        | 54.3                      | 20.7                | 321445                          | ND                        | ND                        | No           |
| MDHM                | VSSFEEK             | Yes               | 413.2                  | 726.3                 | 6.99                        | 54.3                      | 20.7                | 396475                          | ND                        | 88843                     | No           |
| MIF                 | IGGAQNR             | Yes               | 358.2                  | 417.2                 | 5.39                        | 47.2                      | 21.3                | 19091                           | ND                        | ND                        | No           |
| MIF                 | IGGAQNR             | Yes               | 358.2                  | 488.3                 | 5.39                        | 47.2                      | 18.3                | 8220                            | ND                        | ND                        | No           |
| MIF                 | IGGAQNR             | Yes               | 358.2                  | 545.3                 | 5.39                        | 47.2                      | 18.3                | 74631                           | ND                        | ND                        | No           |
| MIF                 | IGGAQNR             | Yes               | 358.2                  | 602.3                 | 5.39                        | 47.2                      | 18.3                | 183307                          | ND                        | ND                        | No           |
| MLH1                | HEVHFLHEESILER      | Yes               | 592.3                  | 267.1                 | 13.23                       | 77.4                      | 33.8                | 21223                           | ND                        | ND                        | No           |
| MLH1                | HEVHFLHEESILER      | Yes               | 592.3                  | 503.2                 | 13.23                       | 77.4                      | 33.8                | 8119                            | ND                        | ND                        | No           |
| MLH1                | HEVHFLHEESILER      | Yes               | 592.3                  | 746.4                 | 13.23                       | 77.4                      | 30.8                | 5859                            | ND                        | ND                        | No           |
| MLH1                | HEVHFLHEESILER      | Yes               | 592.3                  | 763.4                 | 13.23                       | 77.4                      | 30.8                | 3607                            | ND                        | ND                        | No           |
| MLH1                | HFTEDGNILQLANLPDLYK | Yes               | 734.38                 | 635.3                 | 22.79                       | 95.7                      | 32                  | 71535                           | ND                        | ND                        | No           |
| MLH1                | HFTEDGNILQLANLPDLYK | Yes               | 734.38                 | 801.3                 | 22.79                       | 95.7                      | 32                  | 66312                           | ND                        | ND                        | No           |
| MLH1                | HFTEDGNILQLANLPDLYK | Yes               | 734.38                 | 914.4                 | 22.79                       | 95.7                      | 35                  | 62863                           | ND                        | ND                        | No           |
| MLH1                | HFTEDGNILQLANLPDLYK | Yes               | 734.38                 | 933.5                 | 22.79                       | 95.7                      | 32                  | 42425                           | ND                        | ND                        | No           |
| MLH1                | LQSFEDLASISTYGFR    | Yes               | 611.97                 | 379.2                 | 22.27                       | 79.9                      | 28.8                | 42551                           | ND                        | ND                        | No           |
| MLH1                | LQSFEDLASISTYGFR    | Yes               | 611.97                 | 542.3                 | 22.27                       | 79.9                      | 25.8                | 51431                           | ND                        | ND                        | No           |
| MLH1                | LQSFEDLASISTYGFR    | Yes               | 611.97                 | 643.3                 | 22.27                       | 79.9                      | 28.8                | 37097                           | ND                        | ND                        | No           |
| MLH1                | LQSFEDLASISTYGFR    | Yes               | 611.97                 | 730.4                 | 22.27                       | 79.9                      | 28.8                | 120609                          | ND                        | ND                        | No           |

**Table S5.** MRM assay of individual proteins.

| <b>Protein<br/>(_HUMAN)</b> | <b>Peptide</b> | <b>MS/MS<br/>spectrum</b> | <b>Precursor ion<br/>(m/z)</b> | <b>Fragment ion<br/>(m/z)</b> | <b>Retention time<br/>(minutes)</b> | <b>Declustering<br/>potential</b> | <b>Collision<br/>energy</b> | <b>Area of<br/>synthetic<br/>peptide</b> | <b>Area in control<br/>sample</b> | <b>Area in disease<br/>sample</b> | <b>Interference</b> |
|-----------------------------|----------------|---------------------------|--------------------------------|-------------------------------|-------------------------------------|-----------------------------------|-----------------------------|------------------------------------------|-----------------------------------|-----------------------------------|---------------------|
| MLH1                        | TLPNASTVDNIR   | Yes                       | 650.85                         | 717.4                         | 12.02                               | 85                                | 40.1                        | 65486                                    | ND                                | ND                                | No                  |
| MLH1                        | TLPNASTVDNIR   | Yes                       | 650.85                         | 804.4                         | 12.02                               | 85                                | 37.1                        | 72828                                    | ND                                | ND                                | No                  |
| MLH1                        | TLPNASTVDNIR   | Yes                       | 650.85                         | 875.5                         | 12.02                               | 85                                | 40.1                        | 60709                                    | ND                                | ND                                | No                  |
| MLH1                        | TLPNASTVDNIR   | Yes                       | 650.85                         | 989.5                         | 12.02                               | 85                                | 40.1                        | 37338                                    | ND                                | ND                                | No                  |
| MLH1                        | WTVEHIVYK      | Yes                       | 392.21                         | 310.2                         | 13.70                               | 51.6                              | 23.6                        | 112963                                   | ND                                | ND                                | No                  |
| MLH1                        | WTVEHIVYK      | Yes                       | 392.21                         | 522.3                         | 13.70                               | 51.6                              | 17.6                        | 41875                                    | ND                                | ND                                | No                  |
| MLH1                        | WTVEHIVYK      | Yes                       | 392.21                         | 659.4                         | 13.70                               | 51.6                              | 26.6                        | 13370                                    | ND                                | ND                                | No                  |
| MLH1                        | WTVEHIVYK      | Yes                       | 392.21                         | 788.4                         | 13.70                               | 51.6                              | 17.6                        | 9596                                     | ND                                | ND                                | No                  |
| MMP1                        | DGFFYFFHGTR    | Yes                       | 465.22                         | 333.2                         | 21.85                               | 61                                | 30.3                        | 110793                                   | ND                                | ND                                | No                  |
| MMP1                        | DGFFYFFHGTR    | Yes                       | 465.22                         | 617.3                         | 21.85                               | 61                                | 27.3                        | 117915                                   | ND                                | ND                                | No                  |
| MMP1                        | DGFFYFFHGTR    | Yes                       | 465.22                         | 764.4                         | 21.85                               | 61                                | 24.3                        | 99831                                    | ND                                | ND                                | No                  |
| MMP1                        | DGFFYFFHGTR    | Yes                       | 465.22                         | 927.4                         | 21.85                               | 61                                | 24.3                        | 18787                                    | ND                                | ND                                | No                  |
| MMP1                        | DIYSSFGFPR     | Yes                       | 594.79                         | 623.3                         | 19.60                               | 77.7                              | 25.7                        | 51817                                    | ND                                | ND                                | No                  |
| MMP1                        | DIYSSFGFPR     | Yes                       | 594.79                         | 710.4                         | 19.60                               | 77.7                              | 28.7                        | 93929                                    | ND                                | ND                                | No                  |
| MMP1                        | DIYSSFGFPR     | Yes                       | 594.79                         | 797.4                         | 19.60                               | 77.7                              | 28.7                        | 156922                                   | ND                                | ND                                | No                  |
| MMP1                        | DIYSSFGFPR     | Yes                       | 594.79                         | 960.5                         | 19.60                               | 77.7                              | 28.7                        | 123041                                   | ND                                | ND                                | No                  |
| MMP1                        | IENYTPDLPR     | Yes                       | 406.54                         | 385.3                         | 12.64                               | 53.4                              | 27.3                        | 37689                                    | ND                                | ND                                | No                  |
| MMP1                        | IENYTPDLPR     | Yes                       | 406.54                         | 500.3                         | 12.64                               | 53.4                              | 21.3                        | 10038                                    | ND                                | ND                                | No                  |
| MMP1                        | IENYTPDLPR     | Yes                       | 406.54                         | 597.3                         | 12.64                               | 53.4                              | 18.3                        | 25405                                    | ND                                | ND                                | No                  |
| MMP1                        | IENYTPDLPR     | Yes                       | 406.54                         | 698.4                         | 12.64                               | 53.4                              | 27.3                        | 1376                                     | ND                                | ND                                | No                  |
| MMP1                        | LTFDAITTIR     | Yes                       | 575.83                         | 603.4                         | 18.12                               | 75.3                              | 27.8                        | 52776                                    | ND                                | ND                                | No                  |
| MMP1                        | LTFDAITTIR     | Yes                       | 575.83                         | 674.4                         | 18.12                               | 75.3                              | 36.8                        | 86940                                    | ND                                | ND                                | No                  |
| MMP1                        | LTFDAITTIR     | Yes                       | 575.83                         | 789.4                         | 18.12                               | 75.3                              | 36.8                        | 96433                                    | ND                                | ND                                | No                  |

**Table S5.** MRM assay of individual proteins.

| Protein<br>(_HUMAN) | Peptide                  | MS/MS<br>spectrum | Precursor ion<br>(m/z) | Fragment ion<br>(m/z) | Retention time<br>(minutes) | Declustering<br>potential | Collision<br>energy | Area of<br>synthetic<br>peptide | Area in control<br>sample | Area in disease<br>sample | Interference |
|---------------------|--------------------------|-------------------|------------------------|-----------------------|-----------------------------|---------------------------|---------------------|---------------------------------|---------------------------|---------------------------|--------------|
| MMP1                | LTFDAITIR                | Yes               | 575.83                 | 936.5                 | 18.12                       | 75.3                      | 27.8                | 65870                           | ND                        | ND                        | No           |
| MMP1                | SQNPVQPIGPQTPK           | Yes               | 497.6                  | 526.3                 | 9.71                        | 65.2                      | 19.9                | 23711                           | ND                        | ND                        | No           |
| MMP1                | SQNPVQPIGPQTPK           | Yes               | 497.6                  | 627.3                 | 9.71                        | 65.2                      | 22.9                | 31005                           | ND                        | ND                        | No           |
| MMP1                | SQNPVQPIGPQTPK           | Yes               | 497.6                  | 654.3                 | 9.71                        | 65.2                      | 19.9                | 21005                           | ND                        | ND                        | No           |
| MMP1                | SQNPVQPIGPQTPK           | Yes               | 497.6                  | 837.5                 | 9.71                        | 65.2                      | 22.9                | 28630                           | ND                        | ND                        | No           |
| MMP11               | FPVHAALVWGPEK            | Yes               | 484.27                 | 430.2                 | 16.94                       | 63.5                      | 31.2                | 267325                          | ND                        | ND                        | No           |
| MMP11               | FPVHAALVWGPEK            | Yes               | 484.27                 | 616.3                 | 16.94                       | 63.5                      | 22.2                | 351672                          | ND                        | ND                        | No           |
| MMP11               | FPVHAALVWGPEK            | Yes               | 484.27                 | 623.3                 | 16.94                       | 63.5                      | 25.2                | 81320                           | ND                        | ND                        | No           |
| MMP11               | FPVHAALVWGPEK            | Yes               | 484.27                 | 736.4                 | 16.94                       | 63.5                      | 22.2                | 133970                          | ND                        | ND                        | No           |
| MMP11               | FPWQLVQEQR               | Yes               | 715.38                 | 999.6                 | 19.93                       | 93.3                      | 43                  | 33211                           | ND                        | ND                        | No           |
| MMP11               | FPWQLVQEQR               | Yes               | 715.38                 | 659.3                 | 19.93                       | 93.3                      | 37                  | 23921                           | ND                        | ND                        | No           |
| MMP11               | FPWQLVQEQR               | Yes               | 715.38                 | 758.4                 | 19.93                       | 93.3                      | 43                  | 42918                           | ND                        | ND                        | No           |
| MMP11               | FPWQLVQEQR               | Yes               | 715.38                 | 871.5                 | 19.93                       | 93.3                      | 43                  | 40193                           | ND                        | ND                        | No           |
| MMP11               | GGQLQPGYPALASR           | No                |                        |                       |                             |                           |                     |                                 |                           |                           |              |
| MMP11               | GVPSEIDAAFQDADGYAYFLR    | Yes               | 1153.04                | 435.3                 | 24.44                       | 149.7                     | 56.2                | 3603                            | ND                        | ND                        | No           |
| MMP11               | GVPSEIDAAFQDADGYAYFLR    | Yes               | 1153.04                | 583.3                 | 24.44                       | 149.7                     | 50.2                | 2974                            | ND                        | ND                        | No           |
| MMP11               | GVPSEIDAAFQDADGYAYFLR    | Yes               | 1153.04                | 669.4                 | 24.44                       | 149.7                     | 50.2                | 2918                            | ND                        | ND                        | No           |
| MMP11               | GVPSEIDAAFQDADGYAYFLR    | Yes               | 1153.04                | 889.5                 | 24.44                       | 149.7                     | 62.2                | 5670                            | ND                        | ND                        | No           |
| MMP11               | VWSDVTPLTFTEVHEGR        | Yes               | 658.33                 | 286.2                 | 19.08                       | 85.9                      | 28.1                | 107147                          | ND                        | ND                        | No           |
| MMP11               | VWSDVTPLTFTEVHEGR        | Yes               | 658.33                 | 498.2                 | 19.08                       | 85.9                      | 40.1                | 17507                           | ND                        | ND                        | No           |
| MMP11               | VWSDVTPLTFTEVHEGR        | Yes               | 658.33                 | 827.4                 | 19.08                       | 85.9                      | 37.1                | 20023                           | ND                        | ND                        | No           |
| MMP11               | VWSDVTPLTFTEVHEGR        | Yes               | 658.33                 | 974.5                 | 19.08                       | 85.9                      | 40.1                | 12800                           | ND                        | ND                        | No           |
| MMP12               | FLLILLQATASGALPLNSSTSLEK | Yes               | 867.5                  | 261.2                 | 24.91                       | 112.9                     | 50.8                | 18533                           | ND                        | ND                        | No           |

**Table S5.** MRM assay of individual proteins.

| Protein<br>(_HUMAN) | Peptide                   | MS/MS<br>spectrum | Precursor ion<br>(m/z) | Fragment ion<br>(m/z) | Retention time<br>(minutes) | Decustering<br>potential | Collision<br>energy | Area of<br>synthetic<br>peptide | Area in control<br>sample | Area in disease<br>sample | Interference |
|---------------------|---------------------------|-------------------|------------------------|-----------------------|-----------------------------|--------------------------|---------------------|---------------------------------|---------------------------|---------------------------|--------------|
| MMP12               | FLLILLQATASGALPLNSSTSLEK  | Yes               | 867.5                  | 374.2                 | 24.91                       | 112.9                    | 50.8                | 13961                           | ND                        | ND                        | No           |
| MMP12               | FLLILLQATASGALPLNSSTSLEK  | Yes               | 867.5                  | 600.4                 | 24.91                       | 112.9                    | 38.8                | 7379                            | ND                        | ND                        | No           |
| MMP12               | FLLILLQATASGALPLNSSTSLEK  | Yes               | 867.5                  | 713.5                 | 24.91                       | 112.9                    | 41.8                | 6579                            | ND                        | ND                        | No           |
| MMP12               | GIQSLYGDPK                | Yes               | 539.28                 | 416.2                 | 11.62                       | 70.6                     | 26.2                | 70544                           | ND                        | ND                        | No           |
| MMP12               | GIQSLYGDPK                | Yes               | 539.28                 | 579.3                 | 11.62                       | 70.6                     | 26.2                | 135678                          | ND                        | ND                        | No           |
| MMP12               | GIQSLYGDPK                | Yes               | 539.28                 | 779.4                 | 11.62                       | 70.6                     | 26.2                | 102090                          | ND                        | ND                        | No           |
| MMP12               | GIQSLYGDPK                | Yes               | 539.28                 | 907.5                 | 11.62                       | 70.6                     | 26.2                | 22236                           | ND                        | ND                        | No           |
| MMP12               | IDAVFYSK                  | Yes               | 471.75                 | 544.3                 | 12.51                       | 61.9                     | 23.3                | 232771                          | ND                        | ND                        | No           |
| MMP12               | IDAVFYSK                  | Yes               | 471.75                 | 643.3                 | 12.51                       | 61.9                     | 23.3                | 70813                           | ND                        | ND                        | No           |
| MMP12               | IDAVFYSK                  | Yes               | 471.75                 | 714.4                 | 12.51                       | 61.9                     | 23.3                | 360847                          | ND                        | ND                        | No           |
| MMP12               | IDAVFYSK                  | Yes               | 471.75                 | 829.4                 | 12.51                       | 61.9                     | 23.3                | 238489                          | ND                        | ND                        | No           |
| MMP12               | TSVNLISLWPTLPSGIEAAYEIEAR | No                |                        |                       |                             |                          |                     |                                 |                           |                           |              |
| MMP12               | YYYFFQGSNQFEYDFLLQR       | No                |                        |                       |                             |                          |                     |                                 |                           |                           |              |
| MMP14               | AVDSEYPK                  | Yes               | 454.72                 | 407.2                 | 6.98                        | 59.7                     | 31.5                | 37676                           | ND                        | 3288                      | No           |
| MMP14               | AVDSEYPK                  | Yes               | 454.72                 | 623.3                 | 6.98                        | 59.7                     | 22.5                | 37275                           | ND                        | ND                        | No           |
| MMP14               | AVDSEYPK                  | Yes               | 454.72                 | 738.3                 | 6.98                        | 59.7                     | 22.5                | 256132                          | ND                        | ND                        | No           |
| MMP14               | AVDSEYPK                  | Yes               | 454.72                 | 837.4                 | 6.98                        | 59.7                     | 25.5                | 8681                            | ND                        | ND                        | No           |
| MMP14               | FNEELR                    | Yes               | 404.2                  | 262.1                 | 9.05                        | 53.1                     | 20.3                | 135371                          | ND                        | ND                        | No           |
| MMP14               | FNEELR                    | Yes               | 404.2                  | 288.2                 | 9.05                        | 53.1                     | 29.3                | 214919                          | ND                        | ND                        | No           |
| MMP14               | FNEELR                    | Yes               | 404.2                  | 546.3                 | 9.05                        | 53.1                     | 20.3                | 201543                          | ND                        | ND                        | No           |
| MMP14               | FNEELR                    | Yes               | 404.2                  | 660.3                 | 9.05                        | 53.1                     | 23.3                | 140316                          | ND                        | ND                        | No           |
| MMP14               | FYGLQVTGK                 | Yes               | 506.78                 | 305.2                 | 14.01                       | 66.4                     | 33.8                | 469691                          | ND                        | ND                        | No           |
| MMP14               | FYGLQVTGK                 | Yes               | 506.78                 | 532.3                 | 14.01                       | 66.4                     | 24.8                | 132174                          | ND                        | ND                        | No           |

**Table S5.** MRM assay of individual proteins.

| Protein<br>(_HUMAN) | Peptide                       | MS/MS<br>spectrum | Precursor ion<br>(m/z) | Fragment ion<br>(m/z) | Retention time<br>(minutes) | Declustering<br>potential | Collision<br>energy | Area of<br>synthetic<br>peptide | Area in control<br>sample | Area in disease<br>sample | Interference |
|---------------------|-------------------------------|-------------------|------------------------|-----------------------|-----------------------------|---------------------------|---------------------|---------------------------------|---------------------------|---------------------------|--------------|
| MMP14               | FYGLQVTGK                     | Yes               | 506.78                 | 702.4                 | 14.01                       | 66.4                      | 24.8                | 870546                          | ND                        | ND                        | No           |
| MMP14               | FYGLQVTGK                     | Yes               | 506.78                 | 865.5                 | 14.01                       | 66.4                      | 24.8                | 115041                          | ND                        | ND                        | No           |
| MMP14               | HWVFDEASLEPGYPK               | Yes               | 592.29                 | 561.3                 | 17.81                       | 77.4                      | 27.8                | 71765                           | ND                        | ND                        | No           |
| MMP14               | HWVFDEASLEPGYPK               | Yes               | 592.29                 | 685.3                 | 17.81                       | 77.4                      | 30.8                | 12207                           | ND                        | ND                        | No           |
| MMP14               | HWVFDEASLEPGYPK               | Yes               | 592.29                 | 690.3                 | 17.81                       | 77.4                      | 27.8                | 15325                           | ND                        | ND                        | No           |
| MMP14               | HWVFDEASLEPGYPK               | Yes               | 592.29                 | 814.4                 | 17.81                       | 77.4                      | 27.8                | 20873                           | ND                        | ND                        | No           |
| MMP14               | VWESATPLR                     | Yes               | 529.79                 | 286.2                 | 13.56                       | 69.3                      | 22.8                | 326867                          | ND                        | ND                        | No           |
| MMP14               | VWESATPLR                     | Yes               | 529.79                 | 385.3                 | 13.56                       | 69.3                      | 34.8                | 59982                           | ND                        | ND                        | No           |
| MMP14               | VWESATPLR                     | Yes               | 529.79                 | 644.4                 | 13.56                       | 69.3                      | 31.8                | 143165                          | ND                        | ND                        | No           |
| MMP14               | VWESATPLR                     | Yes               | 529.79                 | 773.4                 | 13.56                       | 69.3                      | 25.8                | 254432                          | ND                        | ND                        | No           |
| MMP2                | AFQVWSDVTPLR                  | Yes               | 709.88                 | 385.3                 | 19.51                       | 92.6                      | 30.7                | 116100                          | 47640                     | 36708                     | No           |
| MMP2                | AFQVWSDVTPLR                  | Yes               | 709.88                 | 446.2                 | 19.51                       | 92.6                      | 30.7                | 95786                           | 44821                     | 40207                     | No           |
| MMP2                | AFQVWSDVTPLR                  | Yes               | 709.88                 | 787.4                 | 19.51                       | 92.6                      | 33.7                | 90093                           | 47031                     | 41343                     | No           |
| MMP2                | AFQVWSDVTPLR                  | Yes               | 709.88                 | 973.5                 | 19.51                       | 92.6                      | 33.7                | 92369                           | 55899                     | 36803                     | No           |
| MMP2                | IDAVYEAPQEEK                  | Yes               | 696.34                 | 300.2                 | 10.05                       | 90.8                      | 33.1                | 327613                          | ND                        | ND                        | No           |
| MMP2                | IDAVYEAPQEEK                  | Yes               | 696.34                 | 630.3                 | 10.05                       | 90.8                      | 42.1                | 186710                          | ND                        | ND                        | No           |
| MMP2                | IDAVYEAPQEEK                  | Yes               | 696.34                 | 830.4                 | 10.05                       | 90.8                      | 33.1                | 81042                           | ND                        | ND                        | No           |
| MMP2                | IDAVYEAPQEEK                  | Yes               | 696.34                 | 993.5                 | 10.05                       | 90.8                      | 33.1                | 117243                          | ND                        | ND                        | No           |
| MMP2                | IIGYTPDLDPETVDDAFAR           | Yes               | 703.34                 | 579.3                 | 20.02                       | 91.7                      | 42.4                | 66500                           | 25850                     | 26685                     | No           |
| MMP2                | IIGYTPDLDPETVDDAFAR           | Yes               | 703.34                 | 793.4                 | 20.02                       | 91.7                      | 33.4                | 50786                           | 18593                     | 11285                     | No           |
| MMP2                | IIGYTPDLDPETVDDAFAR           | Yes               | 703.34                 | 894.4                 | 20.02                       | 91.7                      | 33.4                | 48775                           | 19484                     | 11214                     | No           |
| MMP2                | IIGYTPDLDPETVDDAFAR           | Yes               | 703.34                 | 988.5                 | 20.02                       | 91.7                      | 30.4                | 38072                           | 11375                     | 12136                     | No           |
| MMP2                | LIADAWNAIPDNLDAVVDLQGGGHSYFFK | No                |                        |                       |                             |                           |                     |                                 |                           |                           |              |

**Table S5.** MRM assay of individual proteins.

| Protein<br>(_HUMAN) | Peptide                       | MS/MS<br>spectrum | Precursor ion<br>(m/z) | Fragment ion<br>(m/z) | Retention time<br>(minutes) | Decustering<br>potential | Collision<br>energy | Area of<br>synthetic<br>peptide | Area in control<br>sample | Area in disease<br>sample | Interference                           |
|---------------------|-------------------------------|-------------------|------------------------|-----------------------|-----------------------------|--------------------------|---------------------|---------------------------------|---------------------------|---------------------------|----------------------------------------|
| MMP2                | QDIVFDGIAQIR                  | Yes               | 687.87                 | 357.2                 | 18.84                       | 89.7                     | 32.8                | 30699                           | ND                        | ND                        | No                                     |
| MMP2                | QDIVFDGIAQIR                  | Yes               | 687.87                 | 657.4                 | 18.84                       | 89.7                     | 41.8                | 22622                           | ND                        | ND                        | No                                     |
| MMP2                | QDIVFDGIAQIR                  | Yes               | 687.87                 | 772.4                 | 18.84                       | 89.7                     | 41.8                | 14785                           | ND                        | ND                        | No                                     |
| MMP2                | QDIVFDGIAQIR                  | Yes               | 687.87                 | 919.5                 | 18.84                       | 89.7                     | 41.8                | 18807                           | ND                        | ND                        | No                                     |
| MMP26               | DSIYNAVSIWSNVTPLIFQQVQNGDADIK | No                |                        |                       |                             |                          |                     |                                 |                           |                           |                                        |
| MMP26               | HTLTYR                        | No                |                        |                       |                             |                          |                     |                                 |                           |                           |                                        |
| MMP26               | IQHLYGEK                      | Yes               | 494.27                 | 333.2                 | 7.61                        | 64.8                     | 33.2                | 65528                           | ND                        | ND                        | No                                     |
| MMP26               | IQHLYGEK                      | Yes               | 494.27                 | 379.2                 | 7.61                        | 64.8                     | 30.2                | 78159                           | ND                        | ND                        | No                                     |
| MMP26               | IQHLYGEK                      | Yes               | 494.27                 | 609.3                 | 7.61                        | 64.8                     | 30.2                | 45281                           | ND                        | ND                        | No                                     |
| MMP26               | IQHLYGEK                      | Yes               | 494.27                 | 746.4                 | 7.61                        | 64.8                     | 24.2                | 152435                          | ND                        | ND                        | No                                     |
| MMP26               | TFQLSADDIQR                   | Yes               | 647.33                 | 377.2                 | 13.98                       | 84.5                     | 31                  | 223036                          | ND                        | ND                        | No                                     |
| MMP26               | TFQLSADDIQR                   | Yes               | 647.33                 | 717.4                 | 13.98                       | 84.5                     | 31                  | 65420                           | ND                        | ND                        | No                                     |
| MMP26               | TFQLSADDIQR                   | Yes               | 647.33                 | 804.4                 | 13.98                       | 84.5                     | 31                  | 201775                          | ND                        | ND                        | No                                     |
| MMP26               | TFQLSADDIQR                   | Yes               | 647.33                 | 917.5                 | 13.98                       | 84.5                     | 31                  | 92289                           | ND                        | ND                        | No                                     |
| MMP7                | DLPHITVDR                     | Yes               | 355.86                 | 389.2                 | 12.53                       | 46.9                     | 21.7                | 19320                           | 3024                      | 3676                      | Yes (Based on<br>Transition<br>Ratios) |
| MMP7                | DLPHITVDR                     | Yes               | 355.86                 | 490.3                 | 12.53                       | 46.9                     | 18.7                | 46942                           | 1325                      | 1008                      | No                                     |
| MMP7                | DLPHITVDR                     | Yes               | 355.86                 | 603.3                 | 12.53                       | 46.9                     | 18.7                | 65451                           | 1578                      | 955                       | No                                     |
| MMP7                | DLPHITVDR                     | Yes               | 355.86                 | 740.4                 | 12.53                       | 46.9                     | 24.7                | 1903                            | ND                        | ND                        | No                                     |
| MMP7                | IVSYTR                        | Yes               | 369.71                 | 276.2                 | 7.07                        | 48.7                     | 27.8                | 1251                            | ND                        | ND                        | No                                     |
| MMP7                | IVSYTR                        | Yes               | 369.71                 | 439.2                 | 7.07                        | 48.7                     | 24.8                | 2030                            | ND                        | ND                        | No                                     |
| MMP7                | IVSYTR                        | Yes               | 369.71                 | 526.3                 | 7.07                        | 48.7                     | 18.8                | 37190                           | ND                        | ND                        | No                                     |
| MMP7                | IVSYTR                        | Yes               | 369.71                 | 625.3                 | 7.07                        | 48.7                     | 15.8                | 3761                            | ND                        | ND                        | No                                     |

**Table S5.** MRM assay of individual proteins.

| Protein<br>(_HUMAN) | Peptide         | MS/MS<br>spectrum | Precursor ion<br>(m/z) | Fragment ion<br>(m/z) | Retention time<br>(minutes) | Decustering<br>potential | Collision<br>energy | Area of<br>synthetic<br>peptide | Area in control<br>sample | Area in disease<br>sample | Interference |
|---------------------|-----------------|-------------------|------------------------|-----------------------|-----------------------------|--------------------------|---------------------|---------------------------------|---------------------------|---------------------------|--------------|
| MMP7                | LSQDDIK         | Yes               | 409.72                 | 260.2                 | 7.22                        | 53.9                     | 20.5                | 328658                          | 14291                     | 14420                     | No           |
| MMP7                | LSQDDIK         | Yes               | 409.72                 | 490.3                 | 7.22                        | 53.9                     | 20.5                | 65467                           | 6784                      | 3377                      | No           |
| MMP7                | LSQDDIK         | Yes               | 409.72                 | 618.3                 | 7.22                        | 53.9                     | 20.5                | 287697                          | 27205                     | 8643                      | No           |
| MMP7                | LSQDDIK         | Yes               | 409.72                 | 705.3                 | 7.22                        | 53.9                     | 20.5                | 400775                          | 20169                     | 9966                      | No           |
| MMP7                | NANSLEAK        | Yes               | 423.72                 | 347.2                 | 5.94                        | 55.7                     | 30.1                | 61619                           | ND                        | ND                        | No           |
| MMP7                | NANSLEAK        | Yes               | 423.72                 | 547.3                 | 5.94                        | 55.7                     | 21.1                | 56992                           | ND                        | ND                        | No           |
| MMP7                | NANSLEAK        | Yes               | 423.72                 | 661.4                 | 5.94                        | 55.7                     | 21.1                | 154879                          | 3655                      | 2989                      | No           |
| MMP7                | NANSLEAK        | Yes               | 423.72                 | 732.4                 | 5.94                        | 55.7                     | 18.1                | 20588                           | ND                        | ND                        | No           |
| MMP9                | AFALWSAVTPLTFTR | Yes               | 840.96                 | 290.2                 | 24.56                       | 109.5                    | 45.5                | 240899                          | 6471                      | 19474                     | No           |
| MMP9                | AFALWSAVTPLTFTR | Yes               | 840.96                 | 589.3                 | 24.56                       | 109.5                    | 36.5                | 66916                           | 6294                      | 8999                      | No           |
| MMP9                | AFALWSAVTPLTFTR | Yes               | 840.96                 | 734.4                 | 24.56                       | 109.5                    | 36.5                | 96715                           | 4397                      | 6688                      | No           |
| MMP9                | AFALWSAVTPLTFTR | Yes               | 840.96                 | 934.5                 | 24.56                       | 109.5                    | 39.5                | 58168                           | 1343                      | 4688                      | No           |
| MMP9                | AVIDDAFAR       | No                |                        |                       |                             |                          |                     |                                 |                           |                           |              |
| MMP9                | FQTFEGDLK       | Yes               | 542.77                 | 260.2                 | 13.68                       | 71                       | 29.4                | 513634                          | 7030                      | 8373                      | No           |
| MMP9                | FQTFEGDLK       | Yes               | 542.77                 | 276.1                 | 13.68                       | 71                       | 26.4                | 1094219                         | 5340                      | 7019                      | No           |
| MMP9                | FQTFEGDLK       | Yes               | 542.77                 | 708.4                 | 13.68                       | 71                       | 26.4                | 106525                          | 4205                      | 3253                      | No           |
| MMP9                | FQTFEGDLK       | Yes               | 542.77                 | 809.4                 | 13.68                       | 71                       | 26.4                | 588069                          | 6680                      | 10178                     | No           |
| MMP9                | LGLGADVAQVTGALR | Yes               | 480.94                 | 416.3                 | 19.40                       | 63                       | 22.1                | 100682                          | ND                        | 1668                      | No           |
| MMP9                | LGLGADVAQVTGALR | Yes               | 480.94                 | 517.3                 | 19.40                       | 63                       | 22.1                | 132472                          | ND                        | 7427                      | No           |
| MMP9                | LGLGADVAQVTGALR | Yes               | 480.94                 | 616.4                 | 19.40                       | 63                       | 25.1                | 60868                           | ND                        | ND                        | No           |
| MMP9                | LGLGADVAQVTGALR | Yes               | 480.94                 | 744.4                 | 19.40                       | 63                       | 22.1                | 20479                           | ND                        | ND                        | No           |
| MMP9                | SLGPALLLLQK     | Yes               | 576.87                 | 501.3                 | 21.17                       | 75.4                     | 30.9                | 127931                          | 15350                     | 10300                     | No           |
| MMP9                | SLGPALLLLQK     | Yes               | 576.87                 | 614.4                 | 21.17                       | 75.4                     | 27.9                | 199743                          | 19436                     | 20700                     | No           |

**Table S5.** MRM assay of individual proteins.

| Protein<br>(_HUMAN) | Peptide            | MS/MS<br>spectrum | Precursor ion<br>(m/z) | Fragment ion<br>(m/z) | Retention time<br>(minutes) | Declustering<br>potential | Collision<br>energy | Area of<br>synthetic<br>peptide | Area in control<br>sample | Area in disease<br>sample | Interference                           |
|---------------------|--------------------|-------------------|------------------------|-----------------------|-----------------------------|---------------------------|---------------------|---------------------------------|---------------------------|---------------------------|----------------------------------------|
| MMP9                | SLGPALLLLQK        | Yes               | 576.87                 | 727.5                 | 21.17                       | 75.4                      | 27.9                | 100930                          | 10072                     | 11148                     | No                                     |
| MMP9                | SLGPALLLLQK        | Yes               | 576.87                 | 952.6                 | 21.17                       | 75.4                      | 27.9                | 246793                          | 27558                     | 21083                     | No                                     |
| MOGS                | EQILGDEAR          | No                |                        |                       |                             |                           |                     |                                 |                           |                           |                                        |
| MOGS                | SLAASSSFYGYR       | Yes               | 637.31                 | 360.2                 | 11.38                       | 83.2                      | 30.5                | 20789                           | ND                        | ND                        | No                                     |
| MOGS                | SLAASSSFYGYR       | Yes               | 637.31                 | 523.3                 | 11.38                       | 83.2                      | 39.5                | 18290                           | ND                        | ND                        | No                                     |
| MOGS                | SLAASSSFYGYR       | Yes               | 637.31                 | 844.4                 | 11.38                       | 83.2                      | 30.5                | 22732                           | ND                        | ND                        | No                                     |
| MOGS                | SLAASSSFYGYR       | Yes               | 637.31                 | 931.4                 | 11.38                       | 83.2                      | 30.5                | 27301                           | ND                        | ND                        | No                                     |
| MOGS                | TLPSGLDDYPR        | Yes               | 617.31                 | 550.3                 | 13.12                       | 80.6                      | 38.7                | 35444                           | 10444                     | 11359                     | No                                     |
| MOGS                | TLPSGLDDYPR        | Yes               | 617.31                 | 665.3                 | 13.12                       | 80.6                      | 35.7                | 22456                           | 12587                     | 11900                     | Yes (Based on<br>Transition<br>Ratios) |
| MOGS                | TLPSGLDDYPR        | Yes               | 617.31                 | 835.4                 | 13.12                       | 80.6                      | 29.7                | 24175                           | 2157                      | ND                        | No                                     |
| MOGS                | TLPSGLDDYPR        | Yes               | 617.31                 | 922.4                 | 13.12                       | 80.6                      | 38.7                | 33504                           | 5109                      | 4047                      | No                                     |
| MOGS                | VDPALFPPVPLFTAVPSR | No                |                        |                       |                             |                           |                     |                                 |                           |                           |                                        |
| MOGS                | VPPEFLVQR          | No                |                        |                       |                             |                           |                     |                                 |                           |                           |                                        |
| MPRI                | FLHQDIDSGQGIR      | Yes               | 743.38                 | 398.2                 | 10.80                       | 96.9                      | 41.2                | 22065                           | ND                        | ND                        | No                                     |
| MPRI                | FLHQDIDSGQGIR      | Yes               | 743.38                 | 526.3                 | 10.80                       | 96.9                      | 35.2                | 4725                            | ND                        | ND                        | No                                     |
| MPRI                | FLHQDIDSGQGIR      | Yes               | 743.38                 | 617.3                 | 10.80                       | 96.9                      | 44.2                | 11364                           | ND                        | ND                        | No                                     |
| MPRI                | FLHQDIDSGQGIR      | Yes               | 743.38                 | 960.5                 | 10.80                       | 96.9                      | 44.2                | 7383                            | ND                        | ND                        | No                                     |
| MPRI                | GHQAFDVGQPR        | Yes               | 606.3                  | 323.1                 | 9.07                        | 79.2                      | 38.2                | 6951                            | ND                        | ND                        | No                                     |
| MPRI                | GHQAFDVGQPR        | Yes               | 606.3                  | 394.2                 | 9.07                        | 79.2                      | 32.2                | 3263                            | ND                        | ND                        | No                                     |
| MPRI                | GHQAFDVGQPR        | Yes               | 606.3                  | 556.3                 | 9.07                        | 79.2                      | 38.2                | 7319                            | ND                        | ND                        | No                                     |
| MPRI                | GHQAFDVGQPR        | Yes               | 606.3                  | 889.5                 | 9.07                        | 79.2                      | 35.2                | 3902                            | ND                        | ND                        | No                                     |
| MPRI                | TYHSVGDVLR         | Yes               | 617.32                 | 402.2                 | 9.96                        | 80.6                      | 32.7                | 28554                           | 4063                      | 8276                      | No                                     |



**Table S5.** MRM assay of individual proteins.

| Protein<br>(_HUMAN) | Peptide          | MS/MS<br>spectrum | Precursor ion<br>(m/z) | Fragment ion<br>(m/z) | Retention time<br>(minutes) | Declustering<br>potential | Collision<br>energy | Area of<br>synthetic<br>peptide | Area in control<br>sample | Area in disease<br>sample | Interference                       |
|---------------------|------------------|-------------------|------------------------|-----------------------|-----------------------------|---------------------------|---------------------|---------------------------------|---------------------------|---------------------------|------------------------------------|
| MPRI                | TYHSVGDVLR       | Yes               | 617.32                 | 646.4                 | 9.96                        | 80.6                      | 38.7                | 16551                           | 4071                      | 3772                      | No                                 |
| MPRI                | TYHSVGDVLR       | Yes               | 617.32                 | 745.4                 | 9.96                        | 80.6                      | 38.7                | ND                              | 4053                      | 7113                      | Yes (Based on<br>Manual<br>Review) |
| MPRI                | TYHSVGDVLR       | Yes               | 617.32                 | 832.5                 | 9.96                        | 80.6                      | 35.7                | 29936                           | 11114                     | 9351                      | No                                 |
| MPRI                | VPIDGPPIDIGR     | Yes               | 624.85                 | 345.2                 | 15.16                       | 81.6                      | 39                  | 211432                          | 7930                      | 14045                     | No                                 |
| MPRI                | VPIDGPPIDIGR     | Yes               | 624.85                 | 767.4                 | 15.16                       | 81.6                      | 39                  | 90960                           | 7363                      | ND                        | No                                 |
| MPRI                | VPIDGPPIDIGR     | Yes               | 624.85                 | 824.5                 | 15.16                       | 81.6                      | 39                  | 248933                          | 14749                     | 9207                      | No                                 |
| MPRI                | VPIDGPPIDIGR     | Yes               | 624.85                 | 939.5                 | 15.16                       | 81.6                      | 30                  | 87668                           | 2041                      | 3001                      | No                                 |
| MPRI                | YVDQVLQLVYK      | No                |                        |                       |                             |                           |                     |                                 |                           |                           |                                    |
| MRP3                | ADGALTQEEK       | Yes               | 531.26                 | 276.2                 | 6.59                        | 69.5                      | 34.9                | 35586                           | ND                        | ND                        | No                                 |
| MRP3                | ADGALTQEEK       | Yes               | 531.26                 | 634.3                 | 6.59                        | 69.5                      | 22.9                | 113429                          | ND                        | ND                        | No                                 |
| MRP3                | ADGALTQEEK       | Yes               | 531.26                 | 747.4                 | 6.59                        | 69.5                      | 25.9                | 140668                          | ND                        | ND                        | No                                 |
| MRP3                | ADGALTQEEK       | Yes               | 531.26                 | 875.4                 | 6.59                        | 69.5                      | 22.9                | 52452                           | ND                        | ND                        | No                                 |
| MRP3                | DFEISDTK         | Yes               | 534.27                 | 450.2                 | 14.50                       | 69.9                      | 26                  | 181453                          | ND                        | ND                        | No                                 |
| MRP3                | DFEISDTK         | Yes               | 534.27                 | 563.3                 | 14.50                       | 69.9                      | 26                  | 223872                          | ND                        | ND                        | No                                 |
| MRP3                | DFEISDTK         | Yes               | 534.27                 | 676.4                 | 14.50                       | 69.9                      | 26                  | 155409                          | ND                        | ND                        | No                                 |
| MRP3                | DFEISDTK         | Yes               | 534.27                 | 805.4                 | 14.50                       | 69.9                      | 26                  | 189160                          | ND                        | ND                        | No                                 |
| MRP3                | GVVAEFDSPANLIAAR | Yes               | 543.96                 | 317.2                 | 19.25                       | 71.2                      | 25.3                | 34676                           | ND                        | ND                        | No                                 |
| MRP3                | GVVAEFDSPANLIAAR | Yes               | 543.96                 | 430.3                 | 19.25                       | 71.2                      | 25.3                | 32492                           | ND                        | ND                        | No                                 |
| MRP3                | GVVAEFDSPANLIAAR | Yes               | 543.96                 | 657.4                 | 19.25                       | 71.2                      | 22.3                | 9061                            | ND                        | ND                        | No                                 |
| MRP3                | GVVAEFDSPANLIAAR | Yes               | 543.96                 | 825.5                 | 19.25                       | 71.2                      | 31.3                | 12222                           | ND                        | ND                        | No                                 |
| MRP3                | IDGLNVADIGLHDLR  | Yes               | 540.96                 | 288.2                 | 19.34                       | 70.8                      | 34.1                | 268263                          | ND                        | ND                        | No                                 |
| MRP3                | IDGLNVADIGLHDLR  | Yes               | 540.96                 | 612.3                 | 19.34                       | 70.8                      | 22.1                | 85148                           | ND                        | ND                        | No                                 |

**Table S5.** MRM assay of individual proteins.

| Protein<br>(_HUMAN) | Peptide                  | MS/MS<br>spectrum | Precursor ion<br>(m/z) | Fragment ion<br>(m/z) | Retention time<br>(minutes) | Decustering<br>potential | Collision<br>energy | Area of<br>synthetic<br>peptide | Area in control<br>sample | Area in disease<br>sample | Interference |
|---------------------|--------------------------|-------------------|------------------------|-----------------------|-----------------------------|--------------------------|---------------------|---------------------------------|---------------------------|---------------------------|--------------|
| MRP3                | IDGLNVADIGLHDLR          | Yes               | 540.96                 | 710.4                 | 19.34                       | 70.8                     | 34.1                | 97348                           | ND                        | ND                        | No           |
| MRP3                | IDGLNVADIGLHDLR          | Yes               | 540.96                 | 938.5                 | 19.34                       | 70.8                     | 34.1                | 42186                           | ND                        | ND                        | No           |
| MRP3                | NVDPNPYPETSAGFLSR        | Yes               | 621.97                 | 426.2                 | 15.38                       | 81.2                     | 29.3                | 8805                            | ND                        | ND                        | No           |
| MRP3                | NVDPNPYPETSAGFLSR        | Yes               | 621.97                 | 540.2                 | 15.38                       | 81.2                     | 32.3                | 18595                           | ND                        | ND                        | No           |
| MRP3                | NVDPNPYPETSAGFLSR        | Yes               | 621.97                 | 579.3                 | 15.38                       | 81.2                     | 29.3                | 15460                           | ND                        | ND                        | No           |
| MRP3                | NVDPNPYPETSAGFLSR        | Yes               | 621.97                 | 838.4                 | 15.38                       | 81.2                     | 38.3                | 9606                            | ND                        | ND                        | No           |
| MUC1                | EGTINVHDVETQFNQYK        | No                |                        |                       |                             |                          |                     |                                 |                           |                           |              |
| MUC1                | QGGFLGLSNIK              | No                |                        |                       |                             |                          |                     |                                 |                           |                           |              |
| MUC1                | SSVPSSTEK                | Yes               | 461.23                 | 551.3                 | 5.53                        | 60.5                     | 28.8                | 72549                           | ND                        | ND                        | No           |
| MUC1                | SSVPSSTEK                | Yes               | 461.23                 | 648.3                 | 5.53                        | 60.5                     | 22.8                | 634207                          | ND                        | ND                        | No           |
| MUC1                | SSVPSSTEK                | Yes               | 461.23                 | 747.4                 | 5.53                        | 60.5                     | 19.8                | 49854                           | ND                        | ND                        | No           |
| MUC1                | SSVPSSTEK                | Yes               | 461.23                 | 834.4                 | 5.53                        | 60.5                     | 19.8                | 4442                            | ND                        | ND                        | No           |
| MUC1                | VSAGNGGSSLSYTNPAVAATSANL | No                |                        |                       |                             |                          |                     |                                 |                           |                           |              |
| MUC1                | YVPPSSTDR                | Yes               | 511.25                 | 263.1                 | 6.42                        | 67                       | 22                  | 59146                           | ND                        | ND                        | No           |
| MUC1                | YVPPSSTDR                | Yes               | 511.25                 | 565.3                 | 6.42                        | 67                       | 31                  | 28658                           | ND                        | ND                        | No           |
| MUC1                | YVPPSSTDR                | Yes               | 511.25                 | 662.3                 | 6.42                        | 67                       | 28                  | 46822                           | ND                        | ND                        | No           |
| MUC1                | YVPPSSTDR                | Yes               | 511.25                 | 759.4                 | 6.42                        | 67                       | 22                  | 52354                           | ND                        | ND                        | No           |
| MUC16               | ALFSSNLDPSSLVEQVFLDK     | No                |                        |                       |                             |                          |                     |                                 |                           |                           |              |
| MUC16               | DSLYVNGFNPR              | Yes               | 641.32                 | 479.2                 | 14.27                       | 83.7                     | 30.7                | 31956                           | ND                        | ND                        | No           |
| MUC16               | DSLYVNGFNPR              | Yes               | 641.32                 | 590.3                 | 14.27                       | 83.7                     | 30.7                | 29684                           | ND                        | ND                        | No           |
| MUC16               | DSLYVNGFNPR              | Yes               | 641.32                 | 704.3                 | 14.27                       | 83.7                     | 30.7                | 63346                           | ND                        | ND                        | No           |
| MUC16               | DSLYVNGFNPR              | Yes               | 641.32                 | 803.4                 | 14.27                       | 83.7                     | 30.7                | 53429                           | ND                        | ND                        | No           |
| MUC16               | LTLLRPEK                 | Yes               | 323.87                 | 373.2                 | 11.36                       | 42.8                     | 23.1                | 84315                           | ND                        | ND                        | No           |

**Table S5.** MRM assay of individual proteins.

| Protein<br>(_HUMAN) | Peptide             | MS/MS<br>spectrum | Precursor ion<br>(m/z) | Fragment ion<br>(m/z) | Retention time<br>(minutes) | Decustering<br>potential | Collision<br>energy | Area of<br>synthetic<br>peptide | Area in control<br>sample | Area in disease<br>sample | Interference |
|---------------------|---------------------|-------------------|------------------------|-----------------------|-----------------------------|--------------------------|---------------------|---------------------------------|---------------------------|---------------------------|--------------|
| MUC16               | LTLLRPEK            | Yes               | 323.87                 | 529.3                 | 11.36                       | 42.8                     | 17.1                | 30670                           | ND                        | ND                        | No           |
| MUC16               | LTLLRPEK            | Yes               | 323.87                 | 642.4                 | 11.36                       | 42.8                     | 17.1                | 125596                          | ND                        | ND                        | No           |
| MUC16               | LTLLRPEK            | Yes               | 323.87                 | 755.5                 | 11.36                       | 42.8                     | 23.1                | ND                              | ND                        | ND                        | No           |
| MUC16               | VLQGLLTPLFR         | Yes               | 628.89                 | 532.3                 | 24.07                       | 82.1                     | 30.2                | 401319                          | ND                        | ND                        | No           |
| MUC16               | VLQGLLTPLFR         | Yes               | 628.89                 | 746.5                 | 24.07                       | 82.1                     | 27.2                | 441639                          | ND                        | ND                        | No           |
| MUC16               | VLQGLLTPLFR         | Yes               | 628.89                 | 859.5                 | 24.07                       | 82.1                     | 30.2                | 96071                           | ND                        | ND                        | No           |
| MUC16               | VLQGLLTPLFR         | Yes               | 628.89                 | 916.6                 | 24.07                       | 82.1                     | 30.2                | 406284                          | ND                        | ND                        | No           |
| MUC16               | VPTGTITEVSSTGVNSSSK | Yes               | 925.97                 | 569.3                 | 10.98                       | 120.5                    | 52.2                | 3873                            | ND                        | ND                        | No           |
| MUC16               | VPTGTITEVSSTGVNSSSK | Yes               | 925.97                 | 779.4                 | 10.98                       | 120.5                    | 52.2                | 2057                            | ND                        | ND                        | No           |
| MUC16               | VPTGTITEVSSTGVNSSSK | Yes               | 925.97                 | 866.4                 | 10.98                       | 120.5                    | 46.2                | 2579                            | ND                        | ND                        | No           |
| MUC16               | VPTGTITEVSSTGVNSSSK | Yes               | 925.97                 | 953.5                 | 10.98                       | 120.5                    | 52.2                | 2647                            | ND                        | ND                        | No           |
| MUC4                | FLNSNSGLQGLQFYR     | Yes               | 872.44                 | 485.3                 | 19.12                       | 113.5                    | 40.9                | 11202                           | ND                        | ND                        | No           |
| MUC4                | FLNSNSGLQGLQFYR     | Yes               | 872.44                 | 613.3                 | 19.12                       | 113.5                    | 40.9                | 12869                           | ND                        | ND                        | No           |
| MUC4                | FLNSNSGLQGLQFYR     | Yes               | 872.44                 | 783.4                 | 19.12                       | 113.5                    | 40.9                | 17275                           | ND                        | ND                        | No           |
| MUC4                | FLNSNSGLQGLQFYR     | Yes               | 872.44                 | 911.5                 | 19.12                       | 113.5                    | 46.9                | 10697                           | ND                        | ND                        | No           |
| MUC4                | IGLASALQPR          | Yes               | 513.31                 | 584.4                 | 14.42                       | 67.2                     | 25.1                | 138110                          | ND                        | ND                        | No           |
| MUC4                | IGLASALQPR          | Yes               | 513.31                 | 671.4                 | 14.42                       | 67.2                     | 25.1                | 317012                          | ND                        | ND                        | No           |
| MUC4                | IGLASALQPR          | Yes               | 513.31                 | 742.4                 | 14.42                       | 67.2                     | 25.1                | 232520                          | ND                        | ND                        | No           |
| MUC4                | IGLASALQPR          | Yes               | 513.31                 | 912.5                 | 14.42                       | 67.2                     | 34.1                | 93209                           | ND                        | ND                        | No           |
| MUC4                | NDVVFQPISGEDVR      | Yes               | 787.89                 | 274.2                 | 15.27                       | 102.6                    | 46.2                | 211965                          | ND                        | ND                        | No           |
| MUC4                | NDVVFQPISGEDVR      | Yes               | 787.89                 | 329.1                 | 15.27                       | 102.6                    | 37.2                | 537222                          | ND                        | ND                        | No           |
| MUC4                | NDVVFQPISGEDVR      | Yes               | 787.89                 | 428.2                 | 15.27                       | 102.6                    | 34.2                | 201661                          | ND                        | ND                        | No           |
| MUC4                | NDVVFQPISGEDVR      | Yes               | 787.89                 | 872.4                 | 15.27                       | 102.6                    | 46.2                | 179861                          | ND                        | ND                        | No           |

**Table S5.** MRM assay of individual proteins.

| Protein<br>(_HUMAN) | Peptide        | MS/MS<br>spectrum | Precursor ion<br>(m/z) | Fragment ion<br>(m/z) | Retention time<br>(minutes) | Declustering<br>potential | Collision<br>energy | Area of<br>synthetic<br>peptide | Area in control<br>sample | Area in disease<br>sample | Interference |
|---------------------|----------------|-------------------|------------------------|-----------------------|-----------------------------|---------------------------|---------------------|---------------------------------|---------------------------|---------------------------|--------------|
| MUC4                | SLEPFTLEILAR   | Yes               | 694.89                 | 472.3                 | 23.53                       | 90.6                      | 42.1                | 49657                           | ND                        | ND                        | No           |
| MUC4                | SLEPFTLEILAR   | Yes               | 694.89                 | 601.4                 | 23.53                       | 90.6                      | 39.1                | 87622                           | ND                        | ND                        | No           |
| MUC4                | SLEPFTLEILAR   | Yes               | 694.89                 | 815.5                 | 23.53                       | 90.6                      | 42.1                | 130922                          | ND                        | ND                        | No           |
| MUC4                | SLEPFTLEILAR   | Yes               | 694.89                 | 962.6                 | 23.53                       | 90.6                      | 33.1                | 21971                           | ND                        | ND                        | No           |
| MUC4                | STAAPILPER     | Yes               | 632.87                 | 331.2                 | 15.61                       | 82.6                      | 27.3                | 1023965                         | ND                        | ND                        | No           |
| MUC4                | STAAPILPER     | Yes               | 632.87                 | 401.2                 | 15.61                       | 82.6                      | 30.3                | 154319                          | ND                        | ND                        | No           |
| MUC4                | STAAPILPER     | Yes               | 632.87                 | 724.4                 | 15.61                       | 82.6                      | 39.3                | 754726                          | ND                        | ND                        | No           |
| MUC4                | STAAPILPER     | Yes               | 632.87                 | 934.6                 | 15.61                       | 82.6                      | 30.3                | 539313                          | ND                        | ND                        | No           |
| MUC5B               | AVTSLDGGDTAIR  | Yes               | 463.58                 | 288.2                 | 15.65                       | 60.8                      | 30.2                | 3362                            | ND                        | ND                        | No           |
| MUC5B               | AVTSLDGGDTAIR  | Yes               | 463.58                 | 359.2                 | 15.65                       | 60.8                      | 18.2                | 6272                            | ND                        | ND                        | No           |
| MUC5B               | AVTSLDGGDTAIR  | Yes               | 463.58                 | 689.4                 | 15.65                       | 60.8                      | 24.2                | 4275                            | ND                        | ND                        | No           |
| MUC5B               | AVTSLDGGDTAIR  | Yes               | 463.58                 | 804.4                 | 15.65                       | 60.8                      | 24.2                | 3459                            | ND                        | ND                        | No           |
| MUC5B               | LTDPNFAFSR     | Yes               | 554.28                 | 681.3                 | 10.10                       | 72.5                      | 35.9                | 19279                           | ND                        | ND                        | No           |
| MUC5B               | LTDPNFAFSR     | Yes               | 554.28                 | 778.4                 | 10.10                       | 72.5                      | 35.9                | 87683                           | ND                        | ND                        | No           |
| MUC5B               | LTDPNFAFSR     | Yes               | 554.28                 | 893.4                 | 10.10                       | 72.5                      | 26.9                | 15571                           | ND                        | ND                        | No           |
| MUC5B               | LTDPNFAFSR     | Yes               | 554.28                 | 994.5                 | 10.10                       | 72.5                      | 26.9                | 5077                            | ND                        | ND                        | No           |
| MUC5B               | LTPLQFGNLQK    | Yes               | 629.86                 | 559.3                 | 16.72                       | 82.3                      | 39.2                | 173917                          | ND                        | ND                        | No           |
| MUC5B               | LTPLQFGNLQK    | Yes               | 629.86                 | 706.4                 | 16.72                       | 82.3                      | 33.2                | 257300                          | ND                        | ND                        | No           |
| MUC5B               | LTPLQFGNLQK    | Yes               | 629.86                 | 834.4                 | 16.72                       | 82.3                      | 33.2                | 275213                          | ND                        | ND                        | No           |
| MUC5B               | LTPLQFGNLQK    | Yes               | 629.86                 | 947.5                 | 16.72                       | 82.3                      | 39.2                | 53434                           | ND                        | ND                        | No           |
| MUC5B               | SVVGDALEFGNSWK | Yes               | 503.58                 | 529.3                 | 20.78                       | 66                        | 23.2                | 27173                           | ND                        | ND                        | No           |
| MUC5B               | SVVGDALEFGNSWK | Yes               | 503.58                 | 591.3                 | 20.78                       | 66                        | 20.2                | 64009                           | ND                        | ND                        | No           |
| MUC5B               | SVVGDALEFGNSWK | Yes               | 503.58                 | 738.4                 | 20.78                       | 66                        | 23.2                | 56748                           | ND                        | ND                        | No           |

**Table S5.** MRM assay of individual proteins.

| Protein<br>(_HUMAN) | Peptide               | MS/MS<br>spectrum | Precursor ion<br>(m/z) | Fragment ion<br>(m/z) | Retention time<br>(minutes) | Decustering<br>potential | Collision<br>energy | Area of<br>synthetic<br>peptide | Area in control<br>sample | Area in disease<br>sample | Interference |
|---------------------|-----------------------|-------------------|------------------------|-----------------------|-----------------------------|--------------------------|---------------------|---------------------------------|---------------------------|---------------------------|--------------|
| MUC5B               | SVVGDALEFGNSWK        | Yes               | 503.58                 | 867.4                 | 20.78                       | 66                       | 23.2                | 30652                           | ND                        | ND                        | No           |
| MUC5B               | TGLLVEQSGDYIK         | Yes               | 711.88                 | 272.2                 | 15.21                       | 92.8                     | 36.8                | 466660                          | ND                        | ND                        | No           |
| MUC5B               | TGLLVEQSGDYIK         | Yes               | 711.88                 | 385.2                 | 15.21                       | 92.8                     | 33.8                | 154026                          | ND                        | ND                        | No           |
| MUC5B               | TGLLVEQSGDYIK         | Yes               | 711.88                 | 682.3                 | 15.21                       | 92.8                     | 33.8                | 49894                           | ND                        | ND                        | No           |
| MUC5B               | TGLLVEQSGDYIK         | Yes               | 711.88                 | 939.4                 | 15.21                       | 92.8                     | 33.8                | 145601                          | ND                        | ND                        | No           |
| MUCL1               | WVGDLPNGR             | No                |                        |                       |                             |                          |                     |                                 |                           |                           |              |
| NAMPT               | EHFQDDVFNEK           | Yes               | 469.88                 | 390.2                 | 12.15                       | 61.6                     | 21.5                | 153590                          | ND                        | ND                        | No           |
| NAMPT               | EHFQDDVFNEK           | Yes               | 469.88                 | 537.3                 | 12.15                       | 61.6                     | 18.5                | 466876                          | ND                        | ND                        | No           |
| NAMPT               | EHFQDDVFNEK           | Yes               | 469.88                 | 636.3                 | 12.15                       | 61.6                     | 21.5                | 79831                           | ND                        | ND                        | No           |
| NAMPT               | EHFQDDVFNEK           | Yes               | 469.88                 | 772.3                 | 12.15                       | 61.6                     | 21.5                | 164613                          | ND                        | ND                        | No           |
| NAMPT               | GDLEEYGQDLLHTVFK      | Yes               | 621.98                 | 294.2                 | 24.55                       | 81.2                     | 35.3                | 146764                          | ND                        | ND                        | No           |
| NAMPT               | GDLEEYGQDLLHTVFK      | Yes               | 621.98                 | 494.3                 | 24.55                       | 81.2                     | 35.3                | 58470                           | ND                        | ND                        | No           |
| NAMPT               | GDLEEYGQDLLHTVFK      | Yes               | 621.98                 | 857.5                 | 24.55                       | 81.2                     | 32.3                | 26345                           | ND                        | ND                        | No           |
| NAMPT               | GDLEEYGQDLLHTVFK      | Yes               | 621.98                 | 972.6                 | 24.55                       | 81.2                     | 29.3                | 27109                           | ND                        | ND                        | No           |
| NAMPT               | STQAPLIIRPDSGNPLDTVLK | Yes               | 745.75                 | 388.2                 | 19.69                       | 97.2                     | 32.6                | 359771                          | ND                        | ND                        | No           |
| NAMPT               | STQAPLIIRPDSGNPLDTVLK | Yes               | 745.75                 | 460.3                 | 19.69                       | 97.2                     | 41.6                | 57620                           | ND                        | ND                        | No           |
| NAMPT               | STQAPLIIRPDSGNPLDTVLK | Yes               | 745.75                 | 688.4                 | 19.69                       | 97.2                     | 44.6                | 19195                           | ND                        | ND                        | No           |
| NAMPT               | STQAPLIIRPDSGNPLDTVLK | Yes               | 745.75                 | 785.5                 | 19.69                       | 97.2                     | 44.6                | 32476                           | ND                        | ND                        | No           |
| NAMPT               | YDGHLPPIEK            | Yes               | 395.55                 | 260.2                 | 14.14                       | 52                       | 23.7                | 562251                          | ND                        | ND                        | No           |
| NAMPT               | YDGHLPPIEK            | Yes               | 395.55                 | 473.2                 | 14.14                       | 52                       | 20.7                | 397679                          | ND                        | ND                        | No           |
| NAMPT               | YDGHLPPIEK            | Yes               | 395.55                 | 599.4                 | 14.14                       | 52                       | 20.7                | 604269                          | ND                        | ND                        | No           |
| NAMPT               | YDGHLPPIEK            | Yes               | 395.55                 | 712.5                 | 14.14                       | 52                       | 20.7                | 83418                           | ND                        | ND                        | No           |
| NAMPT               | YLLETSGNLDGLEEK       | Yes               | 857.93                 | 277.2                 | 17.83                       | 111.7                    | 40.2                | 177000                          | ND                        | ND                        | No           |

**Table S5.** MRM assay of individual proteins.

| Protein<br>(_HUMAN) | Peptide             | MS/MS<br>spectrum | Precursor ion<br>(m/z) | Fragment ion<br>(m/z) | Retention time<br>(minutes) | Declustering<br>potential | Collision<br>energy | Area of<br>synthetic<br>peptide | Area in control<br>sample | Area in disease<br>sample | Interference |
|---------------------|---------------------|-------------------|------------------------|-----------------------|-----------------------------|---------------------------|---------------------|---------------------------------|---------------------------|---------------------------|--------------|
| NAMPT               | YLLETSGNLDGLEYK     | Yes               | 857.93                 | 439.2                 | 17.83                       | 111.7                     | 37.2                | 27028                           | ND                        | ND                        | No           |
| NAMPT               | YLLETSGNLDGLEYK     | Yes               | 857.93                 | 519.3                 | 17.83                       | 111.7                     | 37.2                | 32833                           | ND                        | ND                        | No           |
| NAMPT               | YLLETSGNLDGLEYK     | Yes               | 857.93                 | 609.3                 | 17.83                       | 111.7                     | 49.2                | 53788                           | ND                        | ND                        | No           |
| NAPSA               | ASSSFQANGTK         | Yes               | 549.26                 | 618.3                 | 6.20                        | 71.9                      | 29.7                | 33762                           | ND                        | ND                        | No           |
| NAPSA               | ASSSFQANGTK         | Yes               | 549.26                 | 765.4                 | 6.20                        | 71.9                      | 26.7                | 25716                           | ND                        | ND                        | No           |
| NAPSA               | ASSSFQANGTK         | Yes               | 549.26                 | 852.4                 | 6.20                        | 71.9                      | 26.7                | 16843                           | ND                        | ND                        | No           |
| NAPSA               | ASSSFQANGTK         | Yes               | 549.26                 | 939.5                 | 6.20                        | 71.9                      | 23.7                | 16040                           | ND                        | ND                        | No           |
| NAPSA               | FAIQYGTGR           | Yes               | 506.76                 | 390.2                 | 12.01                       | 66.4                      | 24.8                | 95432                           | ND                        | ND                        | No           |
| NAPSA               | FAIQYGTGR           | Yes               | 506.76                 | 553.3                 | 12.01                       | 66.4                      | 24.8                | 162297                          | ND                        | ND                        | No           |
| NAPSA               | FAIQYGTGR           | Yes               | 506.76                 | 681.3                 | 12.01                       | 66.4                      | 24.8                | 87139                           | ND                        | ND                        | No           |
| NAPSA               | FAIQYGTGR           | Yes               | 506.76                 | 794.4                 | 12.01                       | 66.4                      | 33.8                | 44812                           | ND                        | ND                        | No           |
| NAPSA               | GADLGWGETAQAQFPG    | No                |                        |                       |                             |                           |                     |                                 |                           |                           |              |
| NAPSA               | LGAPSPGDKPIFVPLSNYR | Yes               | 676.7                  | 539.3                 | 17.46                       | 88.3                      | 41.1                | 107088                          | ND                        | ND                        | No           |
| NAPSA               | LGAPSPGDKPIFVPLSNYR | Yes               | 676.7                  | 652.3                 | 17.46                       | 88.3                      | 41.1                | 50469                           | ND                        | ND                        | No           |
| NAPSA               | LGAPSPGDKPIFVPLSNYR | Yes               | 676.7                  | 749.4                 | 17.46                       | 88.3                      | 41.1                | 417724                          | ND                        | ND                        | No           |
| NAPSA               | LGAPSPGDKPIFVPLSNYR | Yes               | 676.7                  | 995.5                 | 17.46                       | 88.3                      | 41.1                | 29253                           | ND                        | ND                        | No           |
| NAPSA               | VDGILSEDK           | Yes               | 488.25                 | 272.1                 | 10.52                       | 64                        | 24                  | 191311                          | ND                        | ND                        | No           |
| NAPSA               | VDGILSEDK           | Yes               | 488.25                 | 591.3                 | 10.52                       | 64                        | 24                  | 392191                          | ND                        | ND                        | No           |
| NAPSA               | VDGILSEDK           | Yes               | 488.25                 | 761.4                 | 10.52                       | 64                        | 24                  | 288399                          | ND                        | ND                        | No           |
| NAPSA               | VDGILSEDK           | Yes               | 488.25                 | 876.4                 | 10.52                       | 64                        | 24                  | 127825                          | ND                        | ND                        | No           |
| NCF4                | AEALFDFTGNSK        | Yes               | 650.31                 | 272.1                 | 17.56                       | 84.9                      | 31.1                | 1168850                         | 9131                      | 7149                      | No           |
| NCF4                | AEALFDFTGNSK        | Yes               | 650.31                 | 506.3                 | 17.56                       | 84.9                      | 40.1                | 138024                          | ND                        | ND                        | No           |
| NCF4                | AEALFDFTGNSK        | Yes               | 650.31                 | 768.4                 | 17.56                       | 84.9                      | 31.1                | 339064                          | ND                        | ND                        | No           |

**Table S5.** MRM assay of individual proteins.

| Protein<br>(_HUMAN) | Peptide         | MS/MS<br>spectrum | Precursor ion<br>(m/z) | Fragment ion<br>(m/z) | Retention time<br>(minutes) | Declustering<br>potential | Collision<br>energy | Area of<br>synthetic<br>peptide | Area in control<br>sample | Area in disease<br>sample | Interference                       |
|---------------------|-----------------|-------------------|------------------------|-----------------------|-----------------------------|---------------------------|---------------------|---------------------------------|---------------------------|---------------------------|------------------------------------|
| NCF4                | AEALFDFTGNSK    | Yes               | 650.31                 | 915.4                 | 17.56                       | 84.9                      | 31.1                | 288902                          | ND                        | ND                        | No                                 |
| NCF4                | DAEGDLVR        | Yes               | 437.72                 | 274.2                 | 8.73                        | 57.5                      | 30.8                | 37785                           | 5800                      | 9617                      | No                                 |
| NCF4                | DAEGDLVR        | Yes               | 437.72                 | 387.3                 | 8.73                        | 57.5                      | 30.8                | 49757                           | 10145                     | 9025                      | No                                 |
| NCF4                | DAEGDLVR        | Yes               | 437.72                 | 559.3                 | 8.73                        | 57.5                      | 21.8                | ND                              | 7230                      | 16116                     | Yes (Based on<br>Manual<br>Review) |
| NCF4                | DAEGDLVR        | Yes               | 437.72                 | 688.4                 | 8.73                        | 57.5                      | 21.8                | ND                              | 14739                     | 12739                     | Yes (Based on<br>Manual<br>Review) |
| NCF4                | DIAVEEDLSSTPLLK | Yes               | 815.43                 | 300.2                 | 18.97                       | 106.2                     | 38.4                | 94425                           | ND                        | ND                        | No                                 |
| NCF4                | DIAVEEDLSSTPLLK | Yes               | 815.43                 | 470.3                 | 18.97                       | 106.2                     | 44.4                | 35463                           | ND                        | ND                        | No                                 |
| NCF4                | DIAVEEDLSSTPLLK | Yes               | 815.43                 | 658.4                 | 18.97                       | 106.2                     | 41.4                | 12674                           | ND                        | ND                        | No                                 |
| NCF4                | DIAVEEDLSSTPLLK | Yes               | 815.43                 | 745.4                 | 18.97                       | 106.2                     | 41.4                | 24291                           | ND                        | ND                        | No                                 |
| NCF4                | GATGIFPLSFVK    | Yes               | 618.85                 | 400.2                 | 22.59                       | 80.8                      | 26.7                | 931769                          | ND                        | ND                        | No                                 |
| NCF4                | GATGIFPLSFVK    | Yes               | 618.85                 | 690.4                 | 22.59                       | 80.8                      | 29.7                | 1125742                         | 14540                     | 13952                     | No                                 |
| NCF4                | GATGIFPLSFVK    | Yes               | 618.85                 | 837.5                 | 22.59                       | 80.8                      | 26.7                | 2093331                         | 18333                     | 17691                     | No                                 |
| NCF4                | GATGIFPLSFVK    | Yes               | 618.85                 | 950.6                 | 22.59                       | 80.8                      | 29.7                | 163767                          | ND                        | ND                        | No                                 |
| NCF4                | SVSPQGNSVDR     | Yes               | 573.28                 | 274.1                 | 6.01                        | 75                        | 24.7                | 39983                           | ND                        | ND                        | No                                 |
| NCF4                | SVSPQGNSVDR     | Yes               | 573.28                 | 647.3                 | 6.01                        | 75                        | 33.7                | 53236                           | ND                        | ND                        | No                                 |
| NCF4                | SVSPQGNSVDR     | Yes               | 573.28                 | 872.4                 | 6.01                        | 75                        | 24.7                | 40242                           | ND                        | ND                        | No                                 |
| NCF4                | SVSPQGNSVDR     | Yes               | 573.28                 | 959.5                 | 6.01                        | 75                        | 24.7                | 24588                           | ND                        | ND                        | No                                 |
| NDKA                | DRPFFAGLVK      | Yes               | 383.89                 | 416.3                 | 17.74                       | 50.5                      | 17.1                | 39302                           | ND                        | ND                        | No                                 |
| NDKA                | DRPFFAGLVK      | Yes               | 383.89                 | 487.3                 | 17.74                       | 50.5                      | 17.1                | 215020                          | ND                        | ND                        | No                                 |
| NDKA                | DRPFFAGLVK      | Yes               | 383.89                 | 516.3                 | 17.74                       | 50.5                      | 17.1                | 343811                          | ND                        | ND                        | No                                 |

**Table S5.** MRM assay of individual proteins.

| Protein<br>(_HUMAN) | Peptide         | MS/MS<br>spectrum | Precursor ion<br>(m/z) | Fragment ion<br>(m/z) | Retention time<br>(minutes) | Declustering<br>potential | Collision<br>energy | Area of<br>synthetic<br>peptide | Area in control<br>sample | Area in disease<br>sample | Interference |
|---------------------|-----------------|-------------------|------------------------|-----------------------|-----------------------------|---------------------------|---------------------|---------------------------------|---------------------------|---------------------------|--------------|
| NDKA                | DRPFFAGLVK      | Yes               | 383.89                 | 663.3                 | 17.74                       | 50.5                      | 17.1                | 118186                          | ND                        | ND                        | No           |
| NDKA                | EHYVDLK         | Yes               | 301.82                 | 260.2                 | 8.44                        | 39.9                      | 15.9                | 181060                          | ND                        | ND                        | No           |
| NDKA                | EHYVDLK         | Yes               | 301.82                 | 267.1                 | 8.44                        | 39.9                      | 18.9                | 544700                          | ND                        | ND                        | No           |
| NDKA                | EHYVDLK         | Yes               | 301.82                 | 375.2                 | 8.44                        | 39.9                      | 15.9                | 32544                           | ND                        | ND                        | No           |
| NDKA                | EHYVDLK         | Yes               | 301.82                 | 430.2                 | 8.44                        | 39.9                      | 15.9                | 77243                           | ND                        | ND                        | No           |
| NDKA                | NIIHGSDSVESA EK | Yes               | 495.91                 | 347.2                 | 8.58                        | 65                        | 28.8                | 9282                            | ND                        | 1729                      | No           |
| NDKA                | NIIHGSDSVESA EK | Yes               | 495.91                 | 434.2                 | 8.58                        | 65                        | 28.8                | 21374                           | ND                        | 5702                      | No           |
| NDKA                | NIIHGSDSVESA EK | Yes               | 495.91                 | 563.3                 | 8.58                        | 65                        | 22.8                | 35600                           | ND                        | 2424                      | No           |
| NDKA                | NIIHGSDSVESA EK | Yes               | 495.91                 | 824.4                 | 8.58                        | 65                        | 25.8                | 6514                            | ND                        | ND                        | No           |
| NDKA                | TFIAIKPDGVQR    | Yes               | 672.89                 | 433.2                 | 12.59                       | 87.8                      | 35.1                | 17931                           | ND                        | ND                        | No           |
| NDKA                | TFIAIKPDGVQR    | Yes               | 672.89                 | 574.3                 | 12.59                       | 87.8                      | 38.1                | 5174                            | ND                        | ND                        | No           |
| NDKA                | TFIAIKPDGVQR    | Yes               | 672.89                 | 799.4                 | 12.59                       | 87.8                      | 35.1                | 9504                            | ND                        | ND                        | No           |
| NDKA                | TFIAIKPDGVQR    | Yes               | 672.89                 | 983.6                 | 12.59                       | 87.8                      | 41.1                | 9191                            | ND                        | ND                        | No           |
| NDKB                | ASEEHLK         | Yes               | 407.21                 | 526.3                 | 5.44                        | 53.5                      | 20.4                | 18643                           | ND                        | ND                        | No           |
| NDKB                | ASEEHLK         | Yes               | 407.21                 | 554.2                 | 5.44                        | 53.5                      | 17.4                | 2721                            | ND                        | ND                        | No           |
| NDKB                | ASEEHLK         | Yes               | 407.21                 | 655.3                 | 5.44                        | 53.5                      | 20.4                | 40322                           | ND                        | ND                        | No           |
| NDKB                | ASEEHLK         | Yes               | 407.21                 | 742.4                 | 5.44                        | 53.5                      | 20.4                | 35148                           | ND                        | ND                        | No           |
| NDKB                | DRPFFPGLVK      | Yes               | 588.33                 | 663.3                 | 16.91                       | 76.9                      | 37.4                | 44765                           | ND                        | ND                        | No           |
| NDKB                | DRPFFPGLVK      | Yes               | 588.33                 | 817.4                 | 16.91                       | 76.9                      | 37.4                | 122003                          | ND                        | ND                        | No           |
| NDKB                | DRPFFPGLVK      | Yes               | 588.33                 | 904.5                 | 16.91                       | 76.9                      | 28.4                | 11157                           | ND                        | ND                        | No           |
| NDKB                | DRPFFPGLVK      | Yes               | 588.33                 | 930.5                 | 16.91                       | 76.9                      | 31.4                | 61316                           | ND                        | ND                        | No           |
| NDKB                | EISLWFKPEELVDYK | Yes               | 948.49                 | 310.2                 | 22.85                       | 123.4                     | 47.2                | 21007                           | ND                        | ND                        | No           |
| NDKB                | EISLWFKPEELVDYK | Yes               | 948.49                 | 425.2                 | 22.85                       | 123.4                     | 53.2                | 15336                           | ND                        | ND                        | No           |



**Table S5.** MRM assay of individual proteins.

| <b>Protein<br/>(_HUMAN)</b> | <b>Peptide</b>     | <b>MS/MS<br/>spectrum</b> | <b>Precursor ion<br/>(m/z)</b> | <b>Fragment ion<br/>(m/z)</b> | <b>Retention time<br/>(minutes)</b> | <b>Declustering<br/>potential</b> | <b>Collision<br/>energy</b> | <b>Area of<br/>synthetic<br/>peptide</b> | <b>Area in control<br/>sample</b> | <b>Area in disease<br/>sample</b> | <b>Interference</b> |
|-----------------------------|--------------------|---------------------------|--------------------------------|-------------------------------|-------------------------------------|-----------------------------------|-----------------------------|------------------------------------------|-----------------------------------|-----------------------------------|---------------------|
| NDKB                        | EISLWFKPEELVDYK    | Yes                       | 948.49                         | 629.3                         | 22.85                               | 123.4                             | 47.2                        | 5121                                     | ND                                | ND                                | No                  |
| NDKB                        | EISLWFKPEELVDYK    | Yes                       | 948.49                         | 992.5                         | 22.85                               | 123.4                             | 53.2                        | 10326                                    | ND                                | ND                                | No                  |
| NDKB                        | NIIHGSDSVK         | Yes                       | 357.19                         | 333.2                         | 7.44                                | 47.1                              | 21.8                        | 61877                                    | ND                                | ND                                | No                  |
| NDKB                        | NIIHGSDSVK         | Yes                       | 357.19                         | 448.2                         | 7.44                                | 47.1                              | 18.8                        | 17914                                    | ND                                | ND                                | No                  |
| NDKB                        | NIIHGSDSVK         | Yes                       | 357.19                         | 592.3                         | 7.44                                | 47.1                              | 21.8                        | 109839                                   | ND                                | ND                                | No                  |
| NDKB                        | NIIHGSDSVK         | Yes                       | 357.19                         | 729.4                         | 7.44                                | 47.1                              | 15.8                        | 5021                                     | ND                                | ND                                | No                  |
| NDKB                        | TFIAIKPDGVQR       | Yes                       | 672.89                         | 433.2                         | 12.59                               | 87.8                              | 35.1                        | 17931                                    | ND                                | ND                                | No                  |
| NDKB                        | TFIAIKPDGVQR       | Yes                       | 672.89                         | 574.3                         | 12.59                               | 87.8                              | 38.1                        | 5174                                     | ND                                | ND                                | No                  |
| NDKB                        | TFIAIKPDGVQR       | Yes                       | 672.89                         | 799.4                         | 12.59                               | 87.8                              | 35.1                        | 9504                                     | ND                                | ND                                | No                  |
| NDKB                        | TFIAIKPDGVQR       | Yes                       | 672.89                         | 983.6                         | 12.59                               | 87.8                              | 41.1                        | 9191                                     | ND                                | ND                                | No                  |
| NDUS1                       | FEAPLFNAR          | Yes                       | 532.78                         | 277.1                         | 16.55                               | 69.7                              | 22.9                        | 400859                                   | ND                                | ND                                | No                  |
| NDUS1                       | FEAPLFNAR          | Yes                       | 532.78                         | 620.4                         | 16.55                               | 69.7                              | 34.9                        | 59944                                    | ND                                | ND                                | No                  |
| NDUS1                       | FEAPLFNAR          | Yes                       | 532.78                         | 717.4                         | 16.55                               | 69.7                              | 25.9                        | 186451                                   | ND                                | ND                                | No                  |
| NDUS1                       | FEAPLFNAR          | Yes                       | 532.78                         | 788.4                         | 16.55                               | 69.7                              | 25.9                        | 149875                                   | ND                                | ND                                | No                  |
| NDUS1                       | ILQDIASGSHPFQVLK   | Yes                       | 614                            | 260.2                         | 16.73                               | 80.2                              | 34.9                        | 58074                                    | ND                                | ND                                | No                  |
| NDUS1                       | ILQDIASGSHPFQVLK   | Yes                       | 614                            | 355.2                         | 16.73                               | 80.2                              | 25.9                        | 44616                                    | ND                                | ND                                | No                  |
| NDUS1                       | ILQDIASGSHPFQVLK   | Yes                       | 614                            | 798.4                         | 16.73                               | 80.2                              | 28.9                        | 43598                                    | ND                                | ND                                | No                  |
| NDUS1                       | ILQDIASGSHPFQVLK   | Yes                       | 614                            | 818.5                         | 16.73                               | 80.2                              | 31.9                        | 71281                                    | ND                                | ND                                | No                  |
| NDUS1                       | LVNQQLADPLVPPQLTIK | Yes                       | 700.75                         | 583.3                         | 22.00                               | 91.4                              | 42.3                        | 19647                                    | ND                                | ND                                | No                  |
| NDUS1                       | LVNQQLADPLVPPQLTIK | Yes                       | 700.75                         | 796.5                         | 22.00                               | 91.4                              | 33.3                        | 196921                                   | ND                                | ND                                | No                  |
| NDUS1                       | LVNQQLADPLVPPQLTIK | Yes                       | 700.75                         | 895.6                         | 22.00                               | 91.4                              | 30.3                        | 18233                                    | ND                                | ND                                | No                  |
| NDUS1                       | LVNQQLADPLVPPQLTIK | Yes                       | 700.75                         | 995.6                         | 22.00                               | 91.4                              | 33.3                        | 24154                                    | ND                                | ND                                | No                  |
| NDUS1                       | NDGAILAAVSSIAQK    | Yes                       | 764.92                         | 358.1                         | 21.61                               | 99.7                              | 39.2                        | 9564                                     | ND                                | ND                                | No                  |

**Table S5.** MRM assay of individual proteins.

| Protein<br>(_HUMAN) | Peptide             | MS/MS<br>spectrum | Precursor ion<br>(m/z) | Fragment ion<br>(m/z) | Retention time<br>(minutes) | Decustering<br>potential | Collision<br>energy | Area of<br>synthetic<br>peptide | Area in control<br>sample | Area in disease<br>sample | Interference |
|---------------------|---------------------|-------------------|------------------------|-----------------------|-----------------------------|--------------------------|---------------------|---------------------------------|---------------------------|---------------------------|--------------|
| NDUS1               | NDGAILAAVSSIAQK     | Yes               | 764.92                 | 803.5                 | 21.61                       | 99.7                     | 36.2                | 10046                           | ND                        | ND                        | No           |
| NDUS1               | NDGAILAAVSSIAQK     | Yes               | 764.92                 | 874.5                 | 21.61                       | 99.7                     | 36.2                | 11971                           | ND                        | ND                        | No           |
| NDUS1               | NDGAILAAVSSIAQK     | Yes               | 764.92                 | 987.6                 | 21.61                       | 99.7                     | 36.2                | 11525                           | ND                        | ND                        | No           |
| NDUS1               | SATYVNTEGR          | Yes               | 549.26                 | 260.1                 | 7.00                        | 71.9                     | 29.7                | 22303                           | ND                        | ND                        | No           |
| NDUS1               | SATYVNTEGR          | Yes               | 549.26                 | 576.3                 | 7.00                        | 71.9                     | 26.7                | 31630                           | ND                        | ND                        | No           |
| NDUS1               | SATYVNTEGR          | Yes               | 549.26                 | 675.3                 | 7.00                        | 71.9                     | 26.7                | 24082                           | ND                        | ND                        | No           |
| NDUS1               | SATYVNTEGR          | Yes               | 549.26                 | 838.4                 | 7.00                        | 71.9                     | 35.7                | 12690                           | ND                        | ND                        | No           |
| NEBL                | EPAVIGRPDFEHAVEASK  | Yes               | 651.33                 | 305.2                 | 13.28                       | 85                       | 36.8                | 17500                           | ND                        | ND                        | No           |
| NEBL                | EPAVIGRPDFEHAVEASK  | Yes               | 651.33                 | 533.3                 | 13.28                       | 85                       | 39.8                | 9949                            | ND                        | ND                        | No           |
| NEBL                | EPAVIGRPDFEHAVEASK  | Yes               | 651.33                 | 604.3                 | 13.28                       | 85                       | 39.8                | 12040                           | ND                        | ND                        | No           |
| NEBL                | EPAVIGRPDFEHAVEASK  | Yes               | 651.33                 | 741.4                 | 13.28                       | 85                       | 36.8                | 7302                            | ND                        | ND                        | No           |
| NEBL                | GFTPVVDDPVTER       | No                |                        |                       |                             |                          |                     |                                 |                           |                           |              |
| NEBL                | GNAVLQSQVK          | Yes               | 522.3                  | 461.3                 | 8.42                        | 68.4                     | 28.5                | 30077                           | ND                        | ND                        | No           |
| NEBL                | GNAVLQSQVK          | Yes               | 522.3                  | 589.3                 | 8.42                        | 68.4                     | 25.5                | 38635                           | ND                        | ND                        | No           |
| NEBL                | GNAVLQSQVK          | Yes               | 522.3                  | 702.4                 | 8.42                        | 68.4                     | 25.5                | 66022                           | ND                        | ND                        | No           |
| NEBL                | GNAVLQSQVK          | Yes               | 522.3                  | 801.5                 | 8.42                        | 68.4                     | 25.5                | 28433                           | ND                        | ND                        | No           |
| NEBL                | NIGAFISEAK          | Yes               | 525.29                 | 434.2                 | 15.00                       | 68.8                     | 34.6                | 173200                          | ND                        | ND                        | No           |
| NEBL                | NIGAFISEAK          | Yes               | 525.29                 | 547.3                 | 15.00                       | 68.8                     | 34.6                | 89146                           | ND                        | ND                        | No           |
| NEBL                | NIGAFISEAK          | Yes               | 525.29                 | 694.4                 | 15.00                       | 68.8                     | 25.6                | 106367                          | ND                        | ND                        | No           |
| NEBL                | NIGAFISEAK          | Yes               | 525.29                 | 822.4                 | 15.00                       | 68.8                     | 25.6                | 546877                          | ND                        | ND                        | No           |
| NEBL                | TDPGSIFDLDPLEDNIQSR | Yes               | 1066.51                | 458.2                 | 22.84                       | 138.6                    | 49.4                | 5076                            | ND                        | ND                        | No           |
| NEBL                | TDPGSIFDLDPLEDNIQSR | Yes               | 1066.51                | 571.3                 | 22.84                       | 138.6                    | 49.4                | 15324                           | ND                        | ND                        | No           |
| NEBL                | TDPGSIFDLDPLEDNIQSR | Yes               | 1066.51                | 617.3                 | 22.84                       | 138.6                    | 58.4                | 23221                           | ND                        | ND                        | No           |

**Table S5.** MRM assay of individual proteins.

| Protein<br>(_HUMAN) | Peptide             | MS/MS<br>spectrum | Precursor ion<br>(m/z) | Fragment ion<br>(m/z) | Retention time<br>(minutes) | Decustering<br>potential | Collision<br>energy | Area of<br>synthetic<br>peptide | Area in control<br>sample | Area in disease<br>sample | Interference |
|---------------------|---------------------|-------------------|------------------------|-----------------------|-----------------------------|--------------------------|---------------------|---------------------------------|---------------------------|---------------------------|--------------|
| NEBL                | TDPGSIFDLDPLEDNIQSR | Yes               | 1066.51                | 718.3                 | 22.84                       | 138.6                    | 49.4                | 6104                            | ND                        | ND                        | No           |
| NEK4                | DSVSDGFVQENQPR      | Yes               | 789.36                 | 272.2                 | 10.99                       | 102.8                    | 37.2                | 57113                           | ND                        | ND                        | No           |
| NEK4                | DSVSDGFVQENQPR      | Yes               | 789.36                 | 514.3                 | 10.99                       | 102.8                    | 46.2                | 10844                           | ND                        | ND                        | No           |
| NEK4                | DSVSDGFVQENQPR      | Yes               | 789.36                 | 643.3                 | 10.99                       | 102.8                    | 46.2                | 10199                           | ND                        | ND                        | No           |
| NEK4                | DSVSDGFVQENQPR      | Yes               | 789.36                 | 870.4                 | 10.99                       | 102.8                    | 37.2                | 17124                           | ND                        | ND                        | No           |
| NEK4                | DYSPELAELIR         | Yes               | 653.34                 | 366.1                 | 19.23                       | 85.3                     | 28.2                | 116585                          | ND                        | ND                        | No           |
| NEK4                | DYSPELAELIR         | Yes               | 653.34                 | 601.4                 | 19.23                       | 85.3                     | 40.2                | 74525                           | ND                        | ND                        | No           |
| NEK4                | DYSPELAELIR         | Yes               | 653.34                 | 714.5                 | 19.23                       | 85.3                     | 37.2                | 82006                           | ND                        | ND                        | No           |
| NEK4                | DYSPELAELIR         | Yes               | 653.34                 | 940.5                 | 19.23                       | 85.3                     | 31.2                | 76736                           | ND                        | ND                        | No           |
| NEK4                | GSYGEVTLVK          | Yes               | 526.79                 | 460.3                 | 11.97                       | 69                       | 34.7                | 77566                           | ND                        | ND                        | No           |
| NEK4                | GSYGEVTLVK          | Yes               | 526.79                 | 559.4                 | 11.97                       | 69                       | 25.7                | 92467                           | ND                        | ND                        | No           |
| NEK4                | GSYGEVTLVK          | Yes               | 526.79                 | 745.4                 | 11.97                       | 69                       | 25.7                | 279011                          | ND                        | ND                        | No           |
| NEK4                | GSYGEVTLVK          | Yes               | 526.79                 | 908.5                 | 11.97                       | 69                       | 25.7                | 30037                           | ND                        | ND                        | No           |
| NEK4                | LLGSSDSPASASR       | Yes               | 624.32                 | 588.3                 | 8.62                        | 81.5                     | 36                  | 62360                           | ND                        | ND                        | No           |
| NEK4                | LLGSSDSPASASR       | Yes               | 624.32                 | 675.3                 | 8.62                        | 81.5                     | 39                  | 62604                           | ND                        | ND                        | No           |
| NEK4                | LLGSSDSPASASR       | Yes               | 624.32                 | 790.4                 | 8.62                        | 81.5                     | 30                  | 26427                           | ND                        | ND                        | No           |
| NEK4                | LLGSSDSPASASR       | Yes               | 624.32                 | 877.4                 | 8.62                        | 81.5                     | 30                  | 27635                           | ND                        | ND                        | No           |
| NEK4                | VDVTSTQK            | Yes               | 439.24                 | 463.3                 | 5.86                        | 57.7                     | 21.8                | 180833                          | ND                        | ND                        | No           |
| NEK4                | VDVTSTQK            | Yes               | 439.24                 | 564.3                 | 5.86                        | 57.7                     | 21.8                | 541220                          | ND                        | ND                        | No           |
| NEK4                | VDVTSTQK            | Yes               | 439.24                 | 663.4                 | 5.86                        | 57.7                     | 21.8                | 543235                          | ND                        | ND                        | No           |
| NEK4                | VDVTSTQK            | Yes               | 439.24                 | 778.4                 | 5.86                        | 57.7                     | 21.8                | 413686                          | ND                        | ND                        | No           |
| NET1                | AGDWWK              | Yes               | 381.68                 | 333.2                 | 13.78                       | 50.2                     | 25.3                | 80626                           | ND                        | ND                        | No           |
| NET1                | AGDWWK              | Yes               | 381.68                 | 519.3                 | 13.78                       | 50.2                     | 19.3                | 39367                           | ND                        | ND                        | No           |

**Table S5.** MRM assay of individual proteins.

| Protein<br>(_HUMAN) | Peptide            | MS/MS<br>spectrum | Precursor ion<br>(m/z) | Fragment ion<br>(m/z) | Retention time<br>(minutes) | Decustering<br>potential | Collision<br>energy | Area of<br>synthetic<br>peptide | Area in control<br>sample | Area in disease<br>sample | Interference |
|---------------------|--------------------|-------------------|------------------------|-----------------------|-----------------------------|--------------------------|---------------------|---------------------------------|---------------------------|---------------------------|--------------|
| NET1                | AGDWWK             | Yes               | 381.68                 | 634.3                 | 13.78                       | 50.2                     | 19.3                | 12156                           | ND                        | ND                        | No           |
| NET1                | AGDWWK             | Yes               | 381.68                 | 691.3                 | 13.78                       | 50.2                     | 19.3                | 85335                           | ND                        | ND                        | No           |
| NET1                | DSYFYAVSDLQVGR     | No                |                        |                       |                             |                          |                     |                                 |                           |                           |              |
| NET1                | FTVNIISVYK         | No                |                        |                       |                             |                          |                     |                                 |                           |                           |              |
| NET1                | LHTFGDENEDDSELAR   | No                |                        |                       |                             |                          |                     |                                 |                           |                           |              |
| NET1                | SSLVIQWR           | Yes               | 494.78                 | 361.2                 | 16.56                       | 64.8                     | 21.3                | 7652                            | ND                        | ND                        | No           |
| NET1                | SSLVIQWR           | Yes               | 494.78                 | 387.2                 | 16.56                       | 64.8                     | 24.3                | 14263                           | ND                        | ND                        | No           |
| NET1                | SSLVIQWR           | Yes               | 494.78                 | 602.3                 | 16.56                       | 64.8                     | 24.3                | 38726                           | ND                        | ND                        | No           |
| NET1                | SSLVIQWR           | Yes               | 494.78                 | 701.4                 | 16.56                       | 64.8                     | 24.3                | 18553                           | ND                        | ND                        | No           |
| NEU2                | LVQLAGAPEPFEPAPDAY | Yes               | 1007                   | 341.2                 | 18.83                       | 130.9                    | 52.8                | 3883                            | ND                        | ND                        | No           |
| NEU2                | LVQLAGAPEPFEPAPDAY | Yes               | 1007                   | 465.2                 | 18.83                       | 130.9                    | 46.8                | 15176                           | ND                        | ND                        | No           |
| NEU2                | LVQLAGAPEPFEPAPDAY | Yes               | 1007                   | 653.4                 | 18.83                       | 130.9                    | 46.8                | 3746                            | ND                        | ND                        | No           |
| NEU2                | LVQLAGAPEPFEPAPDAY | Yes               | 1007                   | 761.3                 | 18.83                       | 130.9                    | 43.8                | 5825                            | ND                        | ND                        | No           |
| NEU2                | SNATQLDGPAGALLR    | Yes               | 798.94                 | 401.3                 | 18.66                       | 104.1                    | 34.7                | 45122                           | ND                        | ND                        | No           |
| NEU2                | SNATQLDGPAGALLR    | Yes               | 798.94                 | 615.3                 | 18.66                       | 104.1                    | 37.7                | 45534                           | ND                        | ND                        | No           |
| NEU2                | SNATQLDGPAGALLR    | Yes               | 798.94                 | 867.5                 | 18.66                       | 104.1                    | 46.7                | 145625                          | ND                        | ND                        | No           |
| NEU2                | SNATQLDGPAGALLR    | Yes               | 798.94                 | 982.6                 | 18.66                       | 104.1                    | 37.7                | 107522                          | ND                        | ND                        | No           |
| NGAL                | ELTSELK            | Yes               | 410.23                 | 260.2                 | 9.33                        | 53.9                     | 29.5                | 649692                          | ND                        | ND                        | No           |
| NGAL                | ELTSELK            | Yes               | 410.23                 | 389.2                 | 9.33                        | 53.9                     | 20.5                | 230717                          | ND                        | ND                        | No           |
| NGAL                | ELTSELK            | Yes               | 410.23                 | 476.3                 | 9.33                        | 53.9                     | 20.5                | 682034                          | ND                        | ND                        | No           |
| NGAL                | ELTSELK            | Yes               | 410.23                 | 577.3                 | 9.33                        | 53.9                     | 20.5                | 811206                          | ND                        | ND                        | No           |
| NGAL                | ITLYGR             | Yes               | 361.71                 | 395.2                 | 10.64                       | 47.7                     | 18.4                | 39689                           | ND                        | ND                        | No           |
| NGAL                | ITLYGR             | Yes               | 361.71                 | 491.3                 | 10.64                       | 47.7                     | 24.4                | 2866                            | ND                        | ND                        | No           |

**Table S5.** MRM assay of individual proteins.

| Protein<br>(_HUMAN) | Peptide          | MS/MS<br>spectrum | Precursor ion<br>(m/z) | Fragment ion<br>(m/z) | Retention time<br>(minutes) | Declustering<br>potential | Collision<br>energy | Area of<br>synthetic<br>peptide | Area in control<br>sample | Area in disease<br>sample | Interference                           |
|---------------------|------------------|-------------------|------------------------|-----------------------|-----------------------------|---------------------------|---------------------|---------------------------------|---------------------------|---------------------------|----------------------------------------|
| NGAL                | ITLYGR           | Yes               | 361.71                 | 508.3                 | 10.64                       | 47.7                      | 18.4                | 98226                           | ND                        | ND                        | No                                     |
| NGAL                | ITLYGR           | Yes               | 361.71                 | 609.3                 | 10.64                       | 47.7                      | 18.4                | 50881                           | ND                        | ND                        | No                                     |
| NGAL                | SYPGLTSYLVR      | Yes               | 628.34                 | 550.3                 | 18.02                       | 82.1                      | 39.1                | 18355                           | ND                        | ND                        | No                                     |
| NGAL                | SYPGLTSYLVR      | Yes               | 628.34                 | 738.4                 | 18.02                       | 82.1                      | 36.1                | 65125                           | ND                        | ND                        | No                                     |
| NGAL                | SYPGLTSYLVR      | Yes               | 628.34                 | 851.5                 | 18.02                       | 82.1                      | 33.1                | 17776                           | ND                        | ND                        | No                                     |
| NGAL                | SYPGLTSYLVR      | Yes               | 628.34                 | 908.5                 | 18.02                       | 82.1                      | 39.1                | 50119                           | ND                        | ND                        | No                                     |
| NGAL                | VPLQQNFQDNQFQ GK | Yes               | 895.94                 | 438.3                 | 12.97                       | 116.6                     | 44.9                | 5491                            | ND                        | ND                        | No                                     |
| NGAL                | VPLQQNFQDNQFQ GK | Yes               | 895.94                 | 479.3                 | 12.97                       | 116.6                     | 50.9                | 11106                           | ND                        | ND                        | No                                     |
| NGAL                | VPLQQNFQDNQFQ GK | Yes               | 895.94                 | 566.3                 | 12.97                       | 116.6                     | 47.9                | 4887                            | ND                        | ND                        | No                                     |
| NGAL                | VPLQQNFQDNQFQ GK | Yes               | 895.94                 | 836.4                 | 12.97                       | 116.6                     | 44.9                | 4801                            | ND                        | ND                        | No                                     |
| NGAL                | WYVVGLAGNAILR    | Yes               | 716.41                 | 350.2                 | 21.96                       | 93.4                      | 34                  | 97641                           | 23864                     | 21069                     | No                                     |
| NGAL                | WYVVGLAGNAILR    | Yes               | 716.41                 | 643.4                 | 21.96                       | 93.4                      | 34                  | 32062                           | 7911                      | 9971                      | No                                     |
| NGAL                | WYVVGLAGNAILR    | Yes               | 716.41                 | 884.5                 | 21.96                       | 93.4                      | 34                  | 51419                           | 10277                     | 14447                     | No                                     |
| NGAL                | WYVVGLAGNAILR    | Yes               | 716.41                 | 983.6                 | 21.96                       | 93.4                      | 34                  | 33148                           | 6913                      | 8718                      | No                                     |
| NGLY1               | GDDGVAWQHTQLFR   | No                |                        |                       |                             |                           |                     |                                 |                           |                           |                                        |
| NGLY1               | IGNTAFSTR        | Yes               | 483.75                 | 510.3                 | 9.38                        | 63.4                      | 20.8                | 46783                           | ND                        | ND                        | No                                     |
| NGLY1               | IGNTAFSTR        | Yes               | 483.75                 | 581.3                 | 9.38                        | 63.4                      | 26.8                | 20819                           | ND                        | ND                        | No                                     |
| NGLY1               | IGNTAFSTR        | Yes               | 483.75                 | 682.4                 | 9.38                        | 63.4                      | 32.8                | 7014                            | ND                        | ND                        | No                                     |
| NGLY1               | IGNTAFSTR        | Yes               | 483.75                 | 853.4                 | 9.38                        | 63.4                      | 23.8                | 12367                           | ND                        | ND                        | No                                     |
| NGLY1               | IIVELVEFISPK     | No                |                        |                       |                             |                           |                     |                                 |                           |                           |                                        |
| NGLY1               | LLITYADNILR      | Yes               | 435.59                 | 288.2                 | 21.10                       | 57.2                      | 19.8                | 14741                           | 123868                    | 113087                    | Yes (Based on<br>Transition<br>Ratios) |
| NGLY1               | LLITYADNILR      | Yes               | 435.59                 | 401.3                 | 21.10                       | 57.2                      | 22.8                | 8921                            | ND                        | ND                        | No                                     |

**Table S5.** MRM assay of individual proteins.

| Protein<br>(_HUMAN) | Peptide                    | MS/MS<br>spectrum | Precursor ion<br>(m/z) | Fragment ion<br>(m/z) | Retention time<br>(minutes) | Declustering<br>potential | Collision<br>energy | Area of<br>synthetic<br>peptide | Area in control<br>sample | Area in disease<br>sample | Interference                           |
|---------------------|----------------------------|-------------------|------------------------|-----------------------|-----------------------------|---------------------------|---------------------|---------------------------------|---------------------------|---------------------------|----------------------------------------|
| NGLY1               | LLLTYADNILR                | Yes               | 435.59                 | 515.3                 | 21.10                       | 57.2                      | 19.8                | 7709                            | ND                        | 3260                      | Yes (Based on<br>Transition<br>Ratios) |
| NGLY1               | LLLTYADNILR                | Yes               | 435.59                 | 630.4                 | 21.10                       | 57.2                      | 22.8                | 9041                            | ND                        | ND                        | No                                     |
| NGLY1               | SSQQAASTQLPTTPSSNPSGLNQHTR | No                |                        |                       |                             |                           |                     |                                 |                           |                           |                                        |
| NHRF1               | SVDPDSPAEASGLR             | Yes               | 700.836                | 1099.5                | 9.43                        | 100                       | 36.3                | ND                              | ND                        | ND                        | No                                     |
| NHRF1               | SVDPDSPAEASGLR             | Yes               | 700.836                | 550.273               | 9.43                        | 100                       | 33.3                | ND                              | ND                        | ND                        | No                                     |
| NHRF1               | SVDPDSPAEASGLR             | Yes               | 700.836                | 800.427               | 9.43                        | 100                       | 39.3                | ND                              | ND                        | ND                        | No                                     |
| NHRF1               | SVDPDSPAEASGLR             | Yes               | 700.836                | 887.5                 | 9.43                        | 100                       | 36.3                | ND                              | ND                        | ND                        | No                                     |
| NIBAN               | EFPVYLWQPFFR               | Yes               | 814.92                 | 566.3                 | 24.71                       | 106.1                     | 38.4                | 77046                           | ND                        | ND                        | No                                     |
| NIBAN               | EFPVYLWQPFFR               | Yes               | 814.92                 | 694.4                 | 24.71                       | 106.1                     | 35.4                | 38075                           | ND                        | ND                        | No                                     |
| NIBAN               | EFPVYLWQPFFR               | Yes               | 814.92                 | 880.4                 | 24.71                       | 106.1                     | 38.4                | 76940                           | ND                        | ND                        | No                                     |
| NIBAN               | EFPVYLWQPFFR               | Yes               | 814.92                 | 993.5                 | 24.71                       | 106.1                     | 38.4                | 37236                           | ND                        | ND                        | No                                     |
| NIBAN               | EVNEVSQNFQTTK              | Yes               | 762.37                 | 343.2                 | 9.94                        | 99.3                      | 39                  | 41691                           | ND                        | ND                        | No                                     |
| NIBAN               | EVNEVSQNFQTTK              | Yes               | 762.37                 | 349.2                 | 9.94                        | 99.3                      | 36                  | 30530                           | ND                        | ND                        | No                                     |
| NIBAN               | EVNEVSQNFQTTK              | Yes               | 762.37                 | 472.2                 | 9.94                        | 99.3                      | 36                  | 30506                           | ND                        | ND                        | No                                     |
| NIBAN               | EVNEVSQNFQTTK              | Yes               | 762.37                 | 953.5                 | 9.94                        | 99.3                      | 36                  | 52687                           | ND                        | ND                        | No                                     |
| NIBAN               | GESLSLPGPSPPPDGTEQVIISR    | No                |                        |                       |                             |                           |                     |                                 |                           |                           |                                        |
| NIBAN               | NDYAVESYENK                | Yes               | 666.29                 | 393.1                 | 9.51                        | 87                        | 31.8                | 123387                          | ND                        | ND                        | No                                     |
| NIBAN               | NDYAVESYENK                | Yes               | 666.29                 | 769.3                 | 9.51                        | 87                        | 31.8                | 83476                           | ND                        | ND                        | No                                     |
| NIBAN               | NDYAVESYENK                | Yes               | 666.29                 | 868.4                 | 9.51                        | 87                        | 31.8                | 47674                           | ND                        | ND                        | No                                     |
| NIBAN               | NDYAVESYENK                | Yes               | 666.29                 | 939.4                 | 9.51                        | 87                        | 31.8                | 47448                           | ND                        | ND                        | No                                     |
| NIBAN               | VLTSEDEYNLLSDR             | Yes               | 827.4                  | 377.2                 | 16.01                       | 107.7                     | 38.9                | 141220                          | ND                        | ND                        | No                                     |
| NIBAN               | VLTSEDEYNLLSDR             | Yes               | 827.4                  | 490.3                 | 16.01                       | 107.7                     | 38.9                | 48121                           | ND                        | ND                        | No                                     |

**Table S5.** MRM assay of individual proteins.

| Protein<br>(_HUMAN) | Peptide                       | MS/MS<br>spectrum | Precursor ion<br>(m/z) | Fragment ion<br>(m/z) | Retention time<br>(minutes) | Declustering<br>potential | Collision<br>energy | Area of<br>synthetic<br>peptide | Area in control<br>sample | Area in disease<br>sample | Interference |
|---------------------|-------------------------------|-------------------|------------------------|-----------------------|-----------------------------|---------------------------|---------------------|---------------------------------|---------------------------|---------------------------|--------------|
| NIBAN               | VLTSEDEYNLLSDR                | Yes               | 827.4                  | 717.4                 | 16.01                       | 107.7                     | 38.9                | 31856                           | ND                        | ND                        | No           |
| NIBAN               | VLTSEDEYNLLSDR                | Yes               | 827.4                  | 880.5                 | 16.01                       | 107.7                     | 47.9                | 32230                           | ND                        | ND                        | No           |
| NMU                 | GYFLFRPR                      | No                |                        |                       |                             |                           |                     |                                 |                           |                           |              |
| NMU                 | VDEEFQSPFASQSR                | Yes               | 813.87                 | 344.1                 | 15.06                       | 106                       | 38.3                | 14010                           | ND                        | ND                        | No           |
| NMU                 | VDEEFQSPFASQSR                | Yes               | 813.87                 | 477.2                 | 15.06                       | 106                       | 41.3                | 15782                           | ND                        | ND                        | No           |
| NMU                 | VDEEFQSPFASQSR                | Yes               | 813.87                 | 792.4                 | 15.06                       | 106                       | 44.3                | 38143                           | ND                        | ND                        | No           |
| NMU                 | VDEEFQSPFASQSR                | Yes               | 813.87                 | 879.4                 | 15.06                       | 106                       | 38.3                | 26697                           | ND                        | ND                        | No           |
| NRP1                | EGNKPVLFGQNTNPTDVVVAVFPKPLITR | No                |                        |                       |                             |                           |                     |                                 |                           |                           |              |
| NRP1                | FVSDYETHGAGFSIR               | Yes               | 562.6                  | 650.4                 | 14.03                       | 73.6                      | 35.2                | 18383                           | 4524                      | 6843                      | No           |
| NRP1                | FVSDYETHGAGFSIR               | Yes               | 562.6                  | 707.4                 | 14.03                       | 73.6                      | 32.2                | 80267                           | 21877                     | 12713                     | No           |
| NRP1                | FVSDYETHGAGFSIR               | Yes               | 562.6                  | 844.4                 | 14.03                       | 73.6                      | 35.2                | 28337                           | 2003                      | 8003                      | No           |
| NRP1                | FVSDYETHGAGFSIR               | Yes               | 562.6                  | 945.5                 | 14.03                       | 73.6                      | 35.2                | 13737                           | 2553                      | 2171                      | No           |
| NRP1                | FVTAVGTQGAISK                 | Yes               | 639.86                 | 348.2                 | 11.03                       | 83.5                      | 30.7                | 135957                          | ND                        | ND                        | No           |
| NRP1                | FVTAVGTQGAISK                 | Yes               | 639.86                 | 761.4                 | 11.03                       | 83.5                      | 30.7                | 247503                          | ND                        | ND                        | No           |
| NRP1                | FVTAVGTQGAISK                 | Yes               | 639.86                 | 860.5                 | 11.03                       | 83.5                      | 30.7                | 79923                           | ND                        | ND                        | No           |
| NRP1                | FVTAVGTQGAISK                 | Yes               | 639.86                 | 931.5                 | 11.03                       | 83.5                      | 30.7                | 27622                           | ND                        | ND                        | No           |
| NRP1                | IESPGYLTSPGYPHSYHPSEK         | Yes               | 1173.56                | 460.2                 | 12.24                       | 152.4                     | 60.1                | 4288                            | ND                        | ND                        | No           |
| NRP1                | IESPGYLTSPGYPHSYHPSEK         | Yes               | 1173.56                | 597.3                 | 12.24                       | 152.4                     | 60.1                | 1700                            | ND                        | ND                        | No           |
| NRP1                | IESPGYLTSPGYPHSYHPSEK         | Yes               | 1173.56                | 647.3                 | 12.24                       | 152.4                     | 60.1                | 2065                            | ND                        | ND                        | No           |
| NRP1                | IESPGYLTSPGYPHSYHPSEK         | Yes               | 1173.56                | 948.5                 | 12.24                       | 152.4                     | 63.1                | ND                              | ND                        | ND                        | No           |
| NRP1                | SFEGNNNYDTPELR                | Yes               | 828.37                 | 514.3                 | 12.32                       | 107.9                     | 38.9                | 59545                           | 41023                     | 14610                     | No           |
| NRP1                | SFEGNNNYDTPELR                | Yes               | 828.37                 | 615.3                 | 12.32                       | 107.9                     | 47.9                | 42045                           | 21452                     | 24182                     | No           |
| NRP1                | SFEGNNNYDTPELR                | Yes               | 828.37                 | 730.4                 | 12.32                       | 107.9                     | 38.9                | 25260                           | 17890                     | 11653                     | No           |

**Table S5.** MRM assay of individual proteins.

| Protein<br>(_HUMAN) | Peptide              | MS/MS<br>spectrum | Precursor ion<br>(m/z) | Fragment ion<br>(m/z) | Retention time<br>(minutes) | Declustering<br>potential | Collision<br>energy | Area of<br>synthetic<br>peptide | Area in control<br>sample | Area in disease<br>sample | Interference |
|---------------------|----------------------|-------------------|------------------------|-----------------------|-----------------------------|---------------------------|---------------------|---------------------------------|---------------------------|---------------------------|--------------|
| NRP1                | SFEGNNNYDTPELR       | Yes               | 828.37                 | 893.4                 | 12.32                       | 107.9                     | 47.9                | 8328                            | 2836                      | 3516                      | No           |
| ODAM                | EAINFR               | No                |                        |                       |                             |                           |                     |                                 |                           |                           |              |
| ODAM                | IIILLGFLGATLSAPLIPQR | No                |                        |                       |                             |                           |                     |                                 |                           |                           |              |
| ODAM                | SPQQTR               | Yes               | 358.69                 | 276.2                 | 5.19                        | 47.3                      | 21.3                | 6724                            | ND                        | ND                        | No           |
| ODAM                | SPQQTR               | Yes               | 358.69                 | 404.2                 | 5.19                        | 47.3                      | 27.3                | 9329                            | ND                        | ND                        | No           |
| ODAM                | SPQQTR               | Yes               | 358.69                 | 532.3                 | 5.19                        | 47.3                      | 21.3                | 14966                           | ND                        | ND                        | No           |
| ODAM                | SPQQTR               | Yes               | 358.69                 | 629.3                 | 5.19                        | 47.3                      | 15.3                | 681                             | ND                        | ND                        | No           |
| OSTP                | AIPVAQDLNAPSDWDSR    | Yes               | 618.97                 | 262.2                 | 16.26                       | 80.8                      | 38.1                | 97920                           | 14649                     | ND                        | No           |
| OSTP                | AIPVAQDLNAPSDWDSR    | Yes               | 618.97                 | 563.3                 | 16.26                       | 80.8                      | 38.1                | 24744                           | ND                        | ND                        | No           |
| OSTP                | AIPVAQDLNAPSDWDSR    | Yes               | 618.97                 | 765.3                 | 16.26                       | 80.8                      | 32.1                | 23711                           | ND                        | ND                        | No           |
| OSTP                | AIPVAQDLNAPSDWDSR    | Yes               | 618.97                 | 862.4                 | 16.26                       | 80.8                      | 29.1                | 55163                           | 4282                      | ND                        | No           |
| OSTP                | DSYETSQLDDQSAETHSHK  | Yes               | 726.65                 | 284.2                 | 7.96                        | 94.7                      | 43.6                | 2533                            | ND                        | ND                        | No           |
| OSTP                | DSYETSQLDDQSAETHSHK  | Yes               | 726.65                 | 371.2                 | 7.96                        | 94.7                      | 37.6                | 3122                            | ND                        | ND                        | No           |
| OSTP                | DSYETSQLDDQSAETHSHK  | Yes               | 726.65                 | 495.2                 | 7.96                        | 94.7                      | 31.6                | 3085                            | ND                        | ND                        | No           |
| OSTP                | DSYETSQLDDQSAETHSHK  | Yes               | 726.65                 | 609.3                 | 7.96                        | 94.7                      | 37.6                | 2552                            | ND                        | ND                        | No           |
| OSTP                | GDSVVYGLR            | No                |                        |                       |                             |                           |                     |                                 |                           |                           |              |
| OSTP                | ISHELDSASSEVN        | No                |                        |                       |                             |                           |                     |                                 |                           |                           |              |
| OSTP                | YPDAVATWLNPDPSQK     | Yes               | 901.44                 | 459.3                 | 19.07                       | 117.3                     | 48.2                | 69608                           | ND                        | ND                        | No           |
| OSTP                | YPDAVATWLNPDPSQK     | Yes               | 901.44                 | 546.3                 | 19.07                       | 117.3                     | 42.2                | 15034                           | ND                        | ND                        | No           |
| OSTP                | YPDAVATWLNPDPSQK     | Yes               | 901.44                 | 671.3                 | 19.07                       | 117.3                     | 51.2                | 22155                           | ND                        | ND                        | No           |
| OSTP                | YPDAVATWLNPDPSQK     | Yes               | 901.44                 | 785.4                 | 19.07                       | 117.3                     | 48.2                | 16750                           | ND                        | ND                        | No           |
| OVOS2               | DGEAFLLTN            | No                |                        |                       |                             |                           |                     |                                 |                           |                           |              |
| OVOS2               | QGVLDLPNDVVEGSAR     | Yes               | 834.93                 | 285.2                 | 17.63                       | 108.7                     | 45.2                | 35055                           | ND                        | ND                        | No           |



**Table S5.** MRM assay of individual proteins.

| Protein<br>(_HUMAN) | Peptide           | MS/MS<br>spectrum | Precursor ion<br>(m/z) | Fragment ion<br>(m/z) | Retention time<br>(minutes) | Decustering<br>potential | Collision<br>energy | Area of<br>synthetic<br>peptide | Area in control<br>sample | Area in disease<br>sample | Interference  |
|---------------------|-------------------|-------------------|------------------------|-----------------------|-----------------------------|--------------------------|---------------------|---------------------------------|---------------------------|---------------------------|---------------|
| OVOS2               | QGVLDLPNDVVEGSAR  | Yes               | 834.93                 | 390.2                 | 17.63                       | 108.7                    | 48.2                | 13179                           | ND                        | ND                        | No            |
| OVOS2               | QGVLDLPNDVVEGSAR  | Yes               | 834.93                 | 513.3                 | 17.63                       | 108.7                    | 39.2                | 8670                            | ND                        | ND                        | No            |
| OVOS2               | QGVLDLPNDVVEGSAR  | Yes               | 834.93                 | 626.4                 | 17.63                       | 108.7                    | 36.2                | 9404                            | ND                        | ND                        | No            |
| OVOS2               | SDPLAFITFSAK      | Yes               | 648.85                 | 553.3                 | 22.26                       | 84.7                     | 37                  | 146280                          | ND                        | ND                        | No            |
| OVOS2               | SDPLAFITFSAK      | Yes               | 648.85                 | 813.5                 | 22.26                       | 84.7                     | 31                  | 359115                          | ND                        | ND                        | No            |
| OVOS2               | SDPLAFITFSAK      | Yes               | 648.85                 | 884.5                 | 22.26                       | 84.7                     | 31                  | 359408                          | ND                        | ND                        | No            |
| OVOS2               | SDPLAFITFSAK      | Yes               | 648.85                 | 997.6                 | 22.26                       | 84.7                     | 34                  | 73547                           | ND                        | ND                        | No            |
| OVOS2               | SEVTQAPGQYTVDVEGR | Yes               | 918.44                 | 417.2                 | 12.07                       | 119.5                    | 51.9                | 3914                            | ND                        | ND                        | No            |
| OVOS2               | SEVTQAPGQYTVDVEGR | Yes               | 918.44                 | 460.3                 | 12.07                       | 119.5                    | 51.9                | 10633                           | ND                        | ND                        | No            |
| OVOS2               | SEVTQAPGQYTVDVEGR | Yes               | 918.44                 | 545.3                 | 12.07                       | 119.5                    | 39.9                | 4741                            | ND                        | ND                        | No            |
| OVOS2               | SEVTQAPGQYTVDVEGR | Yes               | 918.44                 | 616.3                 | 12.07                       | 119.5                    | 39.9                | 26936                           | ND                        | ND                        | No            |
| OVOS2               | SFLVEPEGIEK       | Yes               | 624.33                 | 575.3                 | 15.53                       | 81.5                     | 39                  | 76355                           | ND                        | ND                        | No            |
| OVOS2               | SFLVEPEGIEK       | Yes               | 624.33                 | 672.4                 | 15.53                       | 81.5                     | 30                  | 952898                          | ND                        | ND                        | No            |
| OVOS2               | SFLVEPEGIEK       | Yes               | 624.33                 | 801.4                 | 15.53                       | 81.5                     | 30                  | 912815                          | ND                        | ND                        | No            |
| OVOS2               | SFLVEPEGIEK       | Yes               | 624.33                 | 900.5                 | 15.53                       | 81.5                     | 30                  | 672187                          | ND                        | ND                        | No            |
| P5CS                | DHVVSDFSEHGSLK    | Yes               | 519.58                 | 253.1                 | 10.26                       | 68                       | 33                  | 288139                          | ND                        | ND                        | No            |
| P5CS                | DHVVSDFSEHGSLK    | Yes               | 519.58                 | 352.2                 | 10.26                       | 68                       | 33                  | 98711                           | ND                        | ND                        | No            |
| P5CS                | DHVVSDFSEHGSLK    | Yes               | 519.58                 | 541.3                 | 10.26                       | 68                       | 33                  | 34055                           | ND                        | ND                        | No            |
| P5CS                | DHVVSDFSEHGSLK    | Yes               | 519.58                 | 653.3                 | 10.26                       | 68                       | 27                  | 36704                           | ND                        | ND                        | No            |
| P5CS                | FGLGAEVGISTSR     | Yes               | 647.34                 | 450.2                 | 15.49                       | 84.5                     | 31                  | 16100                           | ND                        | ND                        | No            |
| P5CS                | FGLGAEVGISTSR     | Yes               | 647.34                 | 620.3                 | 15.49                       | 84.5                     | 31                  | 34634                           | ND                        | ND                        | No            |
| P5CS                | FGLGAEVGISTSR     | Yes               | 647.34                 | 719.4                 | 15.49                       | 84.5                     | 31                  | 16461                           | ND                        | ND                        | No            |
| P5CS                | FGLGAEVGISTSR     | Yes               | 647.34                 | 919.5                 | 15.49                       | 84.5                     | 28                  | ND                              | ND                        | ND                        | Yes (Based on |

**Table S5.** MRM assay of individual proteins.

| Protein<br>(_HUMAN) | Peptide          | MS/MS<br>spectrum | Precursor ion<br>(m/z) | Fragment ion<br>(m/z) | Retention time<br>(minutes) | Decustering<br>potential | Collision<br>energy | Area of<br>synthetic<br>peptide | Area in control<br>sample | Area in disease<br>sample | Interference      |
|---------------------|------------------|-------------------|------------------------|-----------------------|-----------------------------|--------------------------|---------------------|---------------------------------|---------------------------|---------------------------|-------------------|
|                     |                  |                   |                        |                       |                             |                          |                     |                                 |                           |                           | Manual<br>Review) |
| P5CS                | GPVGLEGLLTTK     | Yes               | 592.85                 | 632.4                 | 19.17                       | 77.5                     | 28.6                | 557712                          | ND                        | ND                        | No                |
| P5CS                | GPVGLEGLLTTK     | Yes               | 592.85                 | 761.4                 | 19.17                       | 77.5                     | 28.6                | 802638                          | ND                        | ND                        | No                |
| P5CS                | GPVGLEGLLTTK     | Yes               | 592.85                 | 874.5                 | 19.17                       | 77.5                     | 31.6                | 271923                          | ND                        | ND                        | No                |
| P5CS                | GPVGLEGLLTTK     | Yes               | 592.85                 | 931.5                 | 19.17                       | 77.5                     | 28.6                | 930057                          | ND                        | ND                        | No                |
| P5CS                | HEILLSQSVR       | No                |                        |                       |                             |                          |                     |                                 |                           |                           |                   |
| P5CS                | ILHLLTQEALSIHGVK | Yes               | 591.35                 | 364.2                 | 17.71                       | 77.3                     | 36.7                | 34179                           | ND                        | ND                        | No                |
| P5CS                | ILHLLTQEALSIHGVK | Yes               | 591.35                 | 640.4                 | 17.71                       | 77.3                     | 30.7                | 17433                           | ND                        | ND                        | No                |
| P5CS                | ILHLLTQEALSIHGVK | Yes               | 591.35                 | 753.5                 | 17.71                       | 77.3                     | 30.7                | 14360                           | ND                        | ND                        | No                |
| P5CS                | ILHLLTQEALSIHGVK | Yes               | 591.35                 | 953.5                 | 17.71                       | 77.3                     | 30.7                | 2996                            | ND                        | ND                        | No                |
| PA2GX               | No peptide       |                   |                        |                       |                             |                          |                     |                                 |                           |                           |                   |
| PAPP1               | DIPHWLNPTR       | Yes               | 416.89                 | 373.2                 | 16.11                       | 54.8                     | 21.8                | 73464                           | ND                        | ND                        | No                |
| PAPP1               | DIPHWLNPTR       | Yes               | 416.89                 | 487.3                 | 16.11                       | 54.8                     | 27.8                | 22898                           | ND                        | ND                        | No                |
| PAPP1               | DIPHWLNPTR       | Yes               | 416.89                 | 600.3                 | 16.11                       | 54.8                     | 27.8                | 35736                           | ND                        | ND                        | No                |
| PAPP1               | DIPHWLNPTR       | Yes               | 416.89                 | 786.4                 | 16.11                       | 54.8                     | 24.8                | 49607                           | ND                        | ND                        | No                |
| PAPP1               | EQVDFQHHQLAEAFK  | Yes               | 609.63                 | 365.2                 | 13.37                       | 79.6                     | 34.6                | 29972                           | ND                        | ND                        | No                |
| PAPP1               | EQVDFQHHQLAEAFK  | Yes               | 609.63                 | 565.3                 | 13.37                       | 79.6                     | 34.6                | 13678                           | ND                        | ND                        | No                |
| PAPP1               | EQVDFQHHQLAEAFK  | Yes               | 609.63                 | 678.4                 | 13.37                       | 79.6                     | 31.6                | 43407                           | ND                        | ND                        | No                |
| PAPP1               | EQVDFQHHQLAEAFK  | Yes               | 609.63                 | 806.4                 | 13.37                       | 79.6                     | 31.6                | 8782                            | ND                        | ND                        | No                |
| PAPP1               | GYIEHFSLWK       | Yes               | 640.33                 | 333.2                 | 18.45                       | 83.6                     | 36.7                | 16491                           | ND                        | ND                        | No                |
| PAPP1               | GYIEHFSLWK       | Yes               | 640.33                 | 747.3                 | 18.45                       | 83.6                     | 39.7                | 4146                            | ND                        | ND                        | No                |
| PAPP1               | GYIEHFSLWK       | Yes               | 640.33                 | 817.4                 | 18.45                       | 83.6                     | 30.7                | 10715                           | ND                        | ND                        | No                |

**Table S5.** MRM assay of individual proteins.

| <b>Protein<br/>(_HUMAN)</b> | <b>Peptide</b>   | <b>MS/MS<br/>spectrum</b> | <b>Precursor ion<br/>(m/z)</b> | <b>Fragment ion<br/>(m/z)</b> | <b>Retention time<br/>(minutes)</b> | <b>Declustering<br/>potential</b> | <b>Collision<br/>energy</b> | <b>Area of<br/>synthetic<br/>peptide</b> | <b>Area in control<br/>sample</b> | <b>Area in disease<br/>sample</b> | <b>Interference</b> |
|-----------------------------|------------------|---------------------------|--------------------------------|-------------------------------|-------------------------------------|-----------------------------------|-----------------------------|------------------------------------------|-----------------------------------|-----------------------------------|---------------------|
| PAPP1                       | GYIEHFSLWK       | Yes                       | 640.33                         | 946.5                         | 18.45                               | 83.6                              | 30.7                        | 6842                                     | ND                                | ND                                | No                  |
| PAPP1                       | LDGSTHLNIFFAK    | Yes                       | 488.26                         | 365.2                         | 18.30                               | 64                                | 31.5                        | 94625                                    | ND                                | ND                                | No                  |
| PAPP1                       | LDGSTHLNIFFAK    | Yes                       | 488.26                         | 512.3                         | 18.30                               | 64                                | 25.5                        | 30804                                    | ND                                | ND                                | No                  |
| PAPP1                       | LDGSTHLNIFFAK    | Yes                       | 488.26                         | 838.4                         | 18.30                               | 64                                | 31.5                        | 25195                                    | ND                                | ND                                | No                  |
| PAPP1                       | LDGSTHLNIFFAK    | Yes                       | 488.26                         | 852.5                         | 18.30                               | 64                                | 25.5                        | 30991                                    | ND                                | ND                                | No                  |
| PAPP1                       | VSFSSPLVAISGVALR | Yes                       | 801.96                         | 288.2                         | 24.95                               | 104.5                             | 40.8                        | ND                                       | ND                                | ND                                | No                  |
| PAPP1                       | VSFSSPLVAISGVALR | Yes                       | 801.96                         | 602.4                         | 24.95                               | 104.5                             | 34.8                        | 60724                                    | ND                                | ND                                | No                  |
| PAPP1                       | VSFSSPLVAISGVALR | Yes                       | 801.96                         | 715.4                         | 24.95                               | 104.5                             | 34.8                        | 5656                                     | ND                                | ND                                | No                  |
| PAPP1                       | VSFSSPLVAISGVALR | Yes                       | 801.96                         | 885.6                         | 24.95                               | 104.5                             | 46.8                        | ND                                       | ND                                | ND                                | No                  |
| PBIP1                       | ALESELQQLR       | Yes                       | 593.83                         | 544.3                         | 14.76                               | 77.6                              | 28.6                        | 11154                                    | ND                                | ND                                | No                  |
| PBIP1                       | ALESELQQLR       | Yes                       | 593.83                         | 657.4                         | 14.76                               | 77.6                              | 28.6                        | 7259                                     | ND                                | ND                                | No                  |
| PBIP1                       | ALESELQQLR       | Yes                       | 593.83                         | 786.4                         | 14.76                               | 77.6                              | 37.6                        | 2674                                     | ND                                | ND                                | No                  |
| PBIP1                       | ALESELQQLR       | Yes                       | 593.83                         | 873.5                         | 14.76                               | 77.6                              | 28.6                        | 7691                                     | ND                                | ND                                | No                  |
| PBIP1                       | ELPLSPAFFGEDGIFR | Yes                       | 897.96                         | 492.3                         | 24.53                               | 116.8                             | 51                          | 16553                                    | ND                                | ND                                | No                  |
| PBIP1                       | ELPLSPAFFGEDGIFR | Yes                       | 897.96                         | 540.3                         | 24.53                               | 116.8                             | 39                          | 13446                                    | ND                                | ND                                | No                  |
| PBIP1                       | ELPLSPAFFGEDGIFR | Yes                       | 897.96                         | 793.4                         | 24.53                               | 116.8                             | 39                          | 8678                                     | ND                                | ND                                | No                  |
| PBIP1                       | ELPLSPAFFGEDGIFR | Yes                       | 897.96                         | 940.5                         | 24.53                               | 116.8                             | 51                          | 8188                                     | ND                                | ND                                | No                  |
| PBIP1                       | EQPELSFLK        | Yes                       | 610.31                         | 407.3                         | 17.31                               | 79.7                              | 29.4                        | 114645                                   | ND                                | ND                                | No                  |
| PBIP1                       | EQPELSFLK        | Yes                       | 610.31                         | 494.3                         | 17.31                               | 79.7                              | 29.4                        | 326100                                   | ND                                | ND                                | No                  |
| PBIP1                       | EQPELSFLK        | Yes                       | 610.31                         | 833.5                         | 17.31                               | 79.7                              | 29.4                        | 681027                                   | ND                                | ND                                | No                  |
| PBIP1                       | EQPELSFLK        | Yes                       | 610.31                         | 962.5                         | 17.31                               | 79.7                              | 29.4                        | 101819                                   | ND                                | ND                                | No                  |
| PBIP1                       | GLEEENAQLR       | No                        |                                |                               |                                     |                                   |                             |                                          |                                   |                                   |                     |
| PBIP1                       | QEGLTFFGTTELAPVR | Yes                       | 832.94                         | 371.2                         | 21.75                               | 108.4                             | 36.1                        | 50931                                    | ND                                | ND                                | No                  |

**Table S5.** MRM assay of individual proteins.

| Protein<br>(_HUMAN) | Peptide               | MS/MS<br>spectrum | Precursor ion<br>(m/z) | Fragment ion<br>(m/z) | Retention time<br>(minutes) | Declustering<br>potential | Collision<br>energy | Area of<br>synthetic<br>peptide | Area in control<br>sample | Area in disease<br>sample | Interference |
|---------------------|-----------------------|-------------------|------------------------|-----------------------|-----------------------------|---------------------------|---------------------|---------------------------------|---------------------------|---------------------------|--------------|
| PBIP1               | QEGLTFFGTELAPVR       | Yes               | 832.94                 | 428.2                 | 21.75                       | 108.4                     | 39.1                | 13780                           | ND                        | ND                        | No           |
| PBIP1               | QEGLTFFGTELAPVR       | Yes               | 832.94                 | 442.3                 | 21.75                       | 108.4                     | 36.1                | 20449                           | ND                        | ND                        | No           |
| PBIP1               | QEGLTFFGTELAPVR       | Yes               | 832.94                 | 989.5                 | 21.75                       | 108.4                     | 39.1                | 25248                           | ND                        | ND                        | No           |
| PCBP1               | IANPVEGSSGR           | Yes               | 543.78                 | 463.2                 | 8.18                        | 71.1                      | 35.4                | 38807                           | ND                        | ND                        | No           |
| PCBP1               | IANPVEGSSGR           | Yes               | 543.78                 | 592.3                 | 8.18                        | 71.1                      | 35.4                | 39923                           | ND                        | ND                        | No           |
| PCBP1               | IANPVEGSSGR           | Yes               | 543.78                 | 788.4                 | 8.18                        | 71.1                      | 26.4                | 71183                           | ND                        | ND                        | No           |
| PCBP1               | IANPVEGSSGR           | Yes               | 543.78                 | 902.4                 | 8.18                        | 71.1                      | 35.4                | 7159                            | ND                        | ND                        | No           |
| PCBP1               | IITLTGPTNAIFK         | Yes               | 694.91                 | 328.2                 | 19.52                       | 90.6                      | 33.1                | 171448                          | ND                        | ND                        | No           |
| PCBP1               | IITLTGPTNAIFK         | Yes               | 694.91                 | 790.4                 | 19.52                       | 90.6                      | 33.1                | 86054                           | ND                        | ND                        | No           |
| PCBP1               | IITLTGPTNAIFK         | Yes               | 694.91                 | 847.5                 | 19.52                       | 90.6                      | 33.1                | 179906                          | ND                        | ND                        | No           |
| PCBP1               | IITLTGPTNAIFK         | Yes               | 694.91                 | 948.5                 | 19.52                       | 90.6                      | 33.1                | 119050                          | ND                        | ND                        | No           |
| PCBP1               | LNQVAR                | Yes               | 350.71                 | 455.3                 | 5.74                        | 46.2                      | 23.9                | 9171                            | ND                        | ND                        | No           |
| PCBP1               | LNQVAR                | Yes               | 350.71                 | 473.3                 | 5.74                        | 46.2                      | 17.9                | 96915                           | ND                        | ND                        | No           |
| PCBP1               | LNQVAR                | Yes               | 350.71                 | 526.3                 | 5.74                        | 46.2                      | 17.9                | 1568                            | ND                        | ND                        | No           |
| PCBP1               | LNQVAR                | Yes               | 350.71                 | 587.3                 | 5.74                        | 46.2                      | 20.9                | 93199                           | ND                        | ND                        | No           |
| PCBP1               | QGANINEIR             | Yes               | 507.77                 | 288.2                 | 9.04                        | 66.5                      | 30.8                | 40412                           | ND                        | ND                        | No           |
| PCBP1               | QGANINEIR             | Yes               | 507.77                 | 417.2                 | 9.04                        | 66.5                      | 24.8                | 10102                           | ND                        | ND                        | No           |
| PCBP1               | QGANINEIR             | Yes               | 507.77                 | 531.3                 | 9.04                        | 66.5                      | 24.8                | 41668                           | ND                        | ND                        | No           |
| PCBP1               | QGANINEIR             | Yes               | 507.77                 | 644.4                 | 9.04                        | 66.5                      | 27.8                | 10179                           | ND                        | ND                        | No           |
| PCBP1               | QVTITGSAASISLAQYLINAR | No                |                        |                       |                             |                           |                     |                                 |                           |                           |              |
| PCBP2               | AFAMIIDK              | Yes               | 454.75                 | 375.2                 | 17.33                       | 59.7                      | 31.5                | 1699101                         | ND                        | ND                        | No           |
| PCBP2               | AFAMIIDK              | Yes               | 454.75                 | 488.3                 | 17.33                       | 59.7                      | 25.5                | 641239                          | ND                        | ND                        | No           |
| PCBP2               | AFAMIIDK              | Yes               | 454.75                 | 619.3                 | 17.33                       | 59.7                      | 22.5                | 1079234                         | ND                        | ND                        | No           |

**Table S5.** MRM assay of individual proteins.

| Protein<br>(_HUMAN) | Peptide                         | MS/MS<br>spectrum | Precursor ion<br>(m/z) | Fragment ion<br>(m/z) | Retention time<br>(minutes) | Decustering<br>potential | Collision<br>energy | Area of<br>synthetic<br>peptide | Area in control<br>sample | Area in disease<br>sample | Interference |
|---------------------|---------------------------------|-------------------|------------------------|-----------------------|-----------------------------|--------------------------|---------------------|---------------------------------|---------------------------|---------------------------|--------------|
| PCBP2               | AFAMIIDK                        | Yes               | 454.75                 | 690.4                 | 17.33                       | 59.7                     | 22.5                | 5406799                         | ND                        | ND                        | No           |
| PCBP2               | ESTGAQVQVAGDMLPNSTER            | Yes               | 697.33                 | 492.2                 | 15.07                       | 91                       | 42.1                | 32411                           | ND                        | ND                        | No           |
| PCBP2               | ESTGAQVQVAGDMLPNSTER            | Yes               | 697.33                 | 801.4                 | 15.07                       | 91                       | 42.1                | 23679                           | ND                        | ND                        | No           |
| PCBP2               | ESTGAQVQVAGDMLPNSTER            | Yes               | 697.33                 | 816.4                 | 15.07                       | 91                       | 36.1                | 65077                           | ND                        | ND                        | No           |
| PCBP2               | ESTGAQVQVAGDMLPNSTER            | Yes               | 697.33                 | 947.5                 | 15.07                       | 91                       | 36.1                | 15932                           | ND                        | ND                        | No           |
| PCBP2               | GVTIPYRPKSSSPVIFAGGQDR          | Yes               | 810.44                 | 258.1                 | 16.00                       | 105.5                    | 47.9                | 361948                          | ND                        | ND                        | No           |
| PCBP2               | GVTIPYRPKSSSPVIFAGGQDR          | Yes               | 810.44                 | 532.2                 | 16.00                       | 105.5                    | 41.9                | 118659                          | ND                        | ND                        | No           |
| PCBP2               | GVTIPYRPKSSSPVIFAGGQDR          | Yes               | 810.44                 | 750.4                 | 16.00                       | 105.5                    | 47.9                | 243287                          | ND                        | ND                        | No           |
| PCBP2               | GVTIPYRPKSSSPVIFAGGQDR          | Yes               | 810.44                 | 863.4                 | 16.00                       | 105.5                    | 44.9                | 124871                          | ND                        | ND                        | No           |
| PCBP2               | IANPVEGSTDR                     | Yes               | 579.79                 | 535.2                 | 9.91                        | 75.8                     | 37                  | 623599                          | ND                        | ND                        | No           |
| PCBP2               | IANPVEGSTDR                     | Yes               | 579.79                 | 664.3                 | 9.91                        | 75.8                     | 37                  | 638618                          | ND                        | ND                        | No           |
| PCBP2               | IANPVEGSTDR                     | Yes               | 579.79                 | 860.4                 | 9.91                        | 75.8                     | 31                  | 1272109                         | ND                        | ND                        | No           |
| PCBP2               | IANPVEGSTDR                     | Yes               | 579.79                 | 974.5                 | 9.91                        | 75.8                     | 31                  | 207583                          | ND                        | ND                        | No           |
| PCBP2               | IITLAGPTNAIFK                   | Yes               | 679.91                 | 328.2                 | 21.05                       | 88.7                     | 35.4                | 530954                          | ND                        | ND                        | No           |
| PCBP2               | IITLAGPTNAIFK                   | Yes               | 679.91                 | 790.4                 | 21.05                       | 88.7                     | 29.4                | 321938                          | ND                        | ND                        | No           |
| PCBP2               | IITLAGPTNAIFK                   | Yes               | 679.91                 | 847.5                 | 21.05                       | 88.7                     | 32.4                | 1030637                         | ND                        | ND                        | No           |
| PCBP2               | IITLAGPTNAIFK                   | Yes               | 679.91                 | 918.5                 | 21.05                       | 88.7                     | 41.4                | 338418                          | ND                        | ND                        | No           |
| PCBP2               | LHQLAMQQSHFPMTHGNTGFSGIESSSPEVK | No                |                        |                       |                             |                          |                     |                                 |                           |                           |              |
| PCBP2               | LSSETGGMGSS                     | No                |                        |                       |                             |                          |                     |                                 |                           |                           |              |
| PCBP2               | MDTGVIIEGGLNVTLTIR              | No                |                        |                       |                             |                          |                     |                                 |                           |                           |              |
| PCBP2               | QMSGAIK                         | Yes               | 431.73                 | 388.3                 | 7.89                        | 56.7                     | 21.5                | 39309                           | ND                        | ND                        | No           |
| PCBP2               | QMSGAIK                         | Yes               | 431.73                 | 459.3                 | 7.89                        | 56.7                     | 21.5                | 25250                           | ND                        | ND                        | No           |
| PCBP2               | QMSGAIK                         | Yes               | 431.73                 | 475.2                 | 7.89                        | 56.7                     | 30.5                | 10236                           | ND                        | ND                        | No           |

**Table S5.** MRM assay of individual proteins.

| Protein<br>(_HUMAN) | Peptide               | MS/MS<br>spectrum | Precursor ion<br>(m/z) | Fragment ion<br>(m/z) | Retention time<br>(minutes) | Declustering<br>potential | Collision<br>energy | Area of<br>synthetic<br>peptide | Area in control<br>sample | Area in disease<br>sample | Interference |
|---------------------|-----------------------|-------------------|------------------------|-----------------------|-----------------------------|---------------------------|---------------------|---------------------------------|---------------------------|---------------------------|--------------|
| PCBP2               | QMSGAIK               | Yes               | 431.73                 | 516.3                 | 7.89                        | 56.7                      | 21.5                | 59837                           | ND                        | 3695                      | No           |
| PCBP2               | QVTITGSAASISLAQYLINVR | No                |                        |                       |                             |                           |                     |                                 |                           |                           |              |
| PCD15               | EGDSITYAIENGDPR       | Yes               | 882.91                 | 400.2                 | 13.81                       | 114.9                     | 47.3                | 55698                           | ND                        | ND                        | No           |
| PCD15               | EGDSITYAIENGDPR       | Yes               | 882.91                 | 815.4                 | 13.81                       | 114.9                     | 38.3                | 15432                           | ND                        | ND                        | No           |
| PCD15               | EGDSITYAIENGDPR       | Yes               | 882.91                 | 928.4                 | 13.81                       | 114.9                     | 38.3                | 10348                           | ND                        | ND                        | No           |
| PCD15               | EGDSITYAIENGDPR       | Yes               | 882.91                 | 999.5                 | 13.81                       | 114.9                     | 50.3                | 13094                           | ND                        | ND                        | No           |
| PCD15               | GGPPATIVAIDESR        | No                |                        |                       |                             |                           |                     |                                 |                           |                           |              |
| PCD15               | GTAGGPDPTIELSLK       | Yes               | 728.39                 | 347.2                 | 15.68                       | 95                        | 34.5                | 92553                           | ND                        | ND                        | No           |
| PCD15               | GTAGGPDPTIELSLK       | Yes               | 728.39                 | 556.2                 | 15.68                       | 95                        | 34.5                | 69295                           | ND                        | ND                        | No           |
| PCD15               | GTAGGPDPTIELSLK       | Yes               | 728.39                 | 589.4                 | 15.68                       | 95                        | 43.5                | 78485                           | ND                        | ND                        | No           |
| PCD15               | GTAGGPDPTIELSLK       | Yes               | 728.39                 | 900.5                 | 15.68                       | 95                        | 40.5                | 132716                          | ND                        | ND                        | No           |
| PCD15               | VGAVLLNLQATDR         | Yes               | 685.39                 | 440.3                 | 16.65                       | 89.4                      | 32.7                | 10602                           | ND                        | ND                        | No           |
| PCD15               | VGAVLLNLQATDR         | Yes               | 685.39                 | 462.2                 | 16.65                       | 89.4                      | 29.7                | 7805                            | ND                        | ND                        | No           |
| PCD15               | VGAVLLNLQATDR         | Yes               | 685.39                 | 817.4                 | 16.65                       | 89.4                      | 32.7                | 14452                           | ND                        | ND                        | No           |
| PCD15               | VGAVLLNLQATDR         | Yes               | 685.39                 | 930.5                 | 16.65                       | 89.4                      | 38.7                | 9159                            | ND                        | ND                        | No           |
| PCD15               | VQADSLEVVLANLR        | Yes               | 763.93                 | 473.3                 | 23.58                       | 99.5                      | 33.1                | 22872                           | ND                        | ND                        | No           |
| PCD15               | VQADSLEVVLANLR        | Yes               | 763.93                 | 685.4                 | 23.58                       | 99.5                      | 36.1                | 19802                           | ND                        | ND                        | No           |
| PCD15               | VQADSLEVVLANLR        | Yes               | 763.93                 | 784.5                 | 23.58                       | 99.5                      | 45.1                | 22637                           | ND                        | ND                        | No           |
| PCD15               | VQADSLEVVLANLR        | Yes               | 763.93                 | 913.5                 | 23.58                       | 99.5                      | 42.1                | 20899                           | ND                        | ND                        | No           |
| PCNA                | IEDEEGS               | No                |                        |                       |                             |                           |                     |                                 |                           |                           |              |
| PCNA                | LSQTSNVDK             | Yes               | 496.26                 | 562.3                 | 5.67                        | 65                        | 24.3                | 82978                           | ND                        | ND                        | No           |
| PCNA                | LSQTSNVDK             | Yes               | 496.26                 | 663.3                 | 5.67                        | 65                        | 27.3                | 171780                          | ND                        | ND                        | No           |
| PCNA                | LSQTSNVDK             | Yes               | 496.26                 | 791.4                 | 5.67                        | 65                        | 21.3                | 105708                          | ND                        | ND                        | No           |

**Table S5.** MRM assay of individual proteins.

| Protein<br>(_HUMAN) | Peptide                    | MS/MS<br>spectrum | Precursor ion<br>(m/z) | Fragment ion<br>(m/z) | Retention time<br>(minutes) | Decustering<br>potential | Collision<br>energy | Area of<br>synthetic<br>peptide | Area in control<br>sample | Area in disease<br>sample | Interference |
|---------------------|----------------------------|-------------------|------------------------|-----------------------|-----------------------------|--------------------------|---------------------|---------------------------------|---------------------------|---------------------------|--------------|
| PCNA                | LSQTSNVDK                  | Yes               | 496.26                 | 878.4                 | 5.67                        | 65                       | 24.3                | 121975                          | ND                        | ND                        | No           |
| PCNA                | SEGFDTYR                   | Yes               | 487.71                 | 439.2                 | 9.61                        | 63.9                     | 24                  | 6452                            | ND                        | ND                        | No           |
| PCNA                | SEGFDTYR                   | Yes               | 487.71                 | 554.3                 | 9.61                        | 63.9                     | 24                  | 15037                           | ND                        | ND                        | No           |
| PCNA                | SEGFDTYR                   | Yes               | 487.71                 | 701.3                 | 9.61                        | 63.9                     | 27                  | 4249                            | ND                        | ND                        | No           |
| PCNA                | SEGFDTYR                   | Yes               | 487.71                 | 758.3                 | 9.61                        | 63.9                     | 24                  | 39400                           | ND                        | ND                        | No           |
| PCNA                | YLNFFTK                    | Yes               | 466.75                 | 395.2                 | 18.02                       | 61.2                     | 29                  | 252908                          | ND                        | ND                        | No           |
| PCNA                | YLNFFTK                    | Yes               | 466.75                 | 542.3                 | 18.02                       | 61.2                     | 23                  | 104995                          | ND                        | ND                        | No           |
| PCNA                | YLNFFTK                    | Yes               | 466.75                 | 656.3                 | 18.02                       | 61.2                     | 23                  | 758229                          | 5306                      | 6853                      | No           |
| PCNA                | YLNFFTK                    | Yes               | 466.75                 | 769.4                 | 18.02                       | 61.2                     | 23                  | 260631                          | ND                        | ND                        | No           |
| PCNA                | YYLAPK                     | Yes               | 377.71                 | 315.2                 | 9.26                        | 49.7                     | 19.1                | 195800                          | ND                        | ND                        | No           |
| PCNA                | YYLAPK                     | Yes               | 377.71                 | 327.1                 | 9.26                        | 49.7                     | 19.1                | 285437                          | ND                        | ND                        | No           |
| PCNA                | YYLAPK                     | Yes               | 377.71                 | 428.3                 | 9.26                        | 49.7                     | 19.1                | 559321                          | ND                        | ND                        | No           |
| PCNA                | YYLAPK                     | Yes               | 377.71                 | 591.4                 | 9.26                        | 49.7                     | 19.1                | 223250                          | ND                        | ND                        | No           |
| PCYOX               | FGLNTVLTTDNSDLFINSIGIVPSVR | No                |                        |                       |                             |                          |                     |                                 |                           |                           |              |
| PCYOX               | IAIIGAGIGGTSAAYYLR         | Yes               | 883.99                 | 298.2                 | 20.05                       | 115                      | 41.4                | 69304                           | ND                        | ND                        | No           |
| PCYOX               | IAIIGAGIGGTSAAYYLR         | Yes               | 883.99                 | 596.4                 | 20.05                       | 115                      | 41.4                | 45014                           | ND                        | ND                        | No           |
| PCYOX               | IAIIGAGIGGTSAAYYLR         | Yes               | 883.99                 | 709.5                 | 20.05                       | 115                      | 38.4                | 26627                           | ND                        | ND                        | No           |
| PCYOX               | IAIIGAGIGGTSAAYYLR         | Yes               | 883.99                 | 843.4                 | 20.05                       | 115                      | 47.4                | 8662                            | ND                        | ND                        | No           |
| PCYOX               | IFSQETLTK                  | Yes               | 533.79                 | 591.3                 | 11.26                       | 69.9                     | 35                  | 39764                           | ND                        | ND                        | No           |
| PCYOX               | IFSQETLTK                  | Yes               | 533.79                 | 719.4                 | 11.26                       | 69.9                     | 26                  | 31413                           | ND                        | ND                        | No           |
| PCYOX               | IFSQETLTK                  | Yes               | 533.79                 | 806.4                 | 11.26                       | 69.9                     | 26                  | 240664                          | ND                        | ND                        | No           |
| PCYOX               | IFSQETLTK                  | Yes               | 533.79                 | 953.5                 | 11.26                       | 69.9                     | 26                  | 49035                           | ND                        | ND                        | No           |
| PCYOX               | TLLETLQK                   | Yes               | 473.28                 | 388.3                 | 14.08                       | 62.1                     | 32.3                | 136984                          | ND                        | ND                        | No           |

**Table S5.** MRM assay of individual proteins.

| Protein<br>(_HUMAN) | Peptide            | MS/MS<br>spectrum | Precursor ion<br>(m/z) | Fragment ion<br>(m/z) | Retention time<br>(minutes) | Declustering<br>potential | Collision<br>energy | Area of<br>synthetic<br>peptide | Area in control<br>sample | Area in disease<br>sample | Interference |
|---------------------|--------------------|-------------------|------------------------|-----------------------|-----------------------------|---------------------------|---------------------|---------------------------------|---------------------------|---------------------------|--------------|
| PCYOX               | TLLETQK            | Yes               | 473.28                 | 618.3                 | 14.08                       | 62.1                      | 23.3                | 295250                          | ND                        | ND                        | No           |
| PCYOX               | TLLETQK            | Yes               | 473.28                 | 731.4                 | 14.08                       | 62.1                      | 23.3                | 816104                          | ND                        | ND                        | No           |
| PCYOX               | TLLETQK            | Yes               | 473.28                 | 844.5                 | 14.08                       | 62.1                      | 23.3                | 23169                           | ND                        | ND                        | No           |
| PCYOX               | YQSHDYAFSSVEK      | Yes               | 780.85                 | 276.2                 | 10.84                       | 101.7                     | 39.9                | 6497                            | ND                        | ND                        | No           |
| PCYOX               | YQSHDYAFSSVEK      | Yes               | 780.85                 | 292.1                 | 10.84                       | 101.7                     | 39.9                | 6097                            | ND                        | ND                        | No           |
| PCYOX               | YQSHDYAFSSVEK      | Yes               | 780.85                 | 549.3                 | 10.84                       | 101.7                     | 45.9                | 3721                            | ND                        | ND                        | No           |
| PCYOX               | YQSHDYAFSSVEK      | Yes               | 780.85                 | 930.5                 | 10.84                       | 101.7                     | 45.9                | ND                              | ND                        | ND                        | No           |
| PDGFA               | AHGVHATK           | Yes               | 410.73                 | 456.3                 | 5.20                        | 54                        | 23.6                | 11852                           | ND                        | ND                        | No           |
| PDGFA               | AHGVHATK           | Yes               | 410.73                 | 573.3                 | 5.20                        | 54                        | 23.6                | 13652                           | ND                        | ND                        | No           |
| PDGFA               | AHGVHATK           | Yes               | 410.73                 | 612.3                 | 5.20                        | 54                        | 20.6                | 74747                           | ND                        | ND                        | No           |
| PDGFA               | AHGVHATK           | Yes               | 410.73                 | 674.3                 | 5.20                        | 54                        | 20.6                | 6794                            | ND                        | ND                        | No           |
| PDGFA               | EEDTGRPR           | No                |                        |                       |                             |                           |                     |                                 |                           |                           |              |
| PDGFA               | LLEIDSVGSEDSLDTSLR | Yes               | 974.99                 | 356.2                 | 18.06                       | 126.8                     | 48.4                | 30483                           | ND                        | ND                        | No           |
| PDGFA               | LLEIDSVGSEDSLDTSLR | Yes               | 974.99                 | 476.3                 | 18.06                       | 126.8                     | 54.4                | 17173                           | ND                        | ND                        | No           |
| PDGFA               | LLEIDSVGSEDSLDTSLR | Yes               | 974.99                 | 591.3                 | 18.06                       | 126.8                     | 45.4                | 6990                            | ND                        | ND                        | No           |
| PDGFA               | LLEIDSVGSEDSLDTSLR | Yes               | 974.99                 | 791.4                 | 18.06                       | 126.8                     | 54.4                | 11102                           | ND                        | ND                        | No           |
| PDGFA               | SQIHSIR            | Yes               | 420.74                 | 375.2                 | 6.31                        | 55.3                      | 27                  | 13144                           | ND                        | ND                        | No           |
| PDGFA               | SQIHSIR            | Yes               | 420.74                 | 512.3                 | 6.31                        | 55.3                      | 24                  | 16567                           | ND                        | ND                        | No           |
| PDGFA               | SQIHSIR            | Yes               | 420.74                 | 553.3                 | 6.31                        | 55.3                      | 21                  | 3071                            | 3920                      | 909                       | No           |
| PDGFA               | SQIHSIR            | Yes               | 420.74                 | 625.4                 | 6.31                        | 55.3                      | 24                  | 70712                           | 26727                     | 10148                     | No           |
| PDGFA               | TVIYEIPR           | Yes               | 495.78                 | 272.2                 | 13.59                       | 65                        | 33.3                | 20672                           | ND                        | ND                        | No           |
| PDGFA               | TVIYEIPR           | Yes               | 495.78                 | 385.3                 | 13.59                       | 65                        | 30.3                | 22678                           | ND                        | ND                        | No           |
| PDGFA               | TVIYEIPR           | Yes               | 495.78                 | 677.4                 | 13.59                       | 65                        | 27.3                | 50856                           | ND                        | ND                        | No           |



**Table S5.** MRM assay of individual proteins.

| <b>Protein<br/>(_HUMAN)</b> | <b>Peptide</b> | <b>MS/MS<br/>spectrum</b> | <b>Precursor ion<br/>(m/z)</b> | <b>Fragment ion<br/>(m/z)</b> | <b>Retention time<br/>(minutes)</b> | <b>Declustering<br/>potential</b> | <b>Collision<br/>energy</b> | <b>Area of<br/>synthetic<br/>peptide</b> | <b>Area in control<br/>sample</b> | <b>Area in disease<br/>sample</b> | <b>Interference</b> |
|-----------------------------|----------------|---------------------------|--------------------------------|-------------------------------|-------------------------------------|-----------------------------------|-----------------------------|------------------------------------------|-----------------------------------|-----------------------------------|---------------------|
| PDGFA                       | TVIYEIPR       | Yes                       | 495.78                         | 790.4                         | 13.59                               | 65                                | 24.3                        | 55777                                    | ND                                | ND                                | No                  |
| PDGFB                       | SFDDLQR        | Yes                       | 440.71                         | 416.3                         | 9.91                                | 57.9                              | 27.9                        | 86177                                    | ND                                | ND                                | No                  |
| PDGFB                       | SFDDLQR        | Yes                       | 440.71                         | 531.3                         | 9.91                                | 57.9                              | 21.9                        | 52020                                    | ND                                | ND                                | No                  |
| PDGFB                       | SFDDLQR        | Yes                       | 440.71                         | 646.3                         | 9.91                                | 57.9                              | 21.9                        | 207193                                   | ND                                | ND                                | No                  |
| PDGFB                       | SFDDLQR        | Yes                       | 440.71                         | 793.4                         | 9.91                                | 57.9                              | 30.9                        | 4627                                     | ND                                | ND                                | No                  |
| PDGFB                       | SHSGGELESLAR   | Yes                       | 414.87                         | 446.3                         | 10.25                               | 54.5                              | 18.7                        | 258539                                   | 4665                              | 7528                              | No                  |
| PDGFB                       | SHSGGELESLAR   | Yes                       | 414.87                         | 555.2                         | 10.25                               | 54.5                              | 18.7                        | 210218                                   | 7001                              | 4754                              | No                  |
| PDGFB                       | SHSGGELESLAR   | Yes                       | 414.87                         | 575.3                         | 10.25                               | 54.5                              | 18.7                        | 109583                                   | 2142                              | 4831                              | No                  |
| PDGFB                       | SHSGGELESLAR   | Yes                       | 414.87                         | 668.3                         | 10.25                               | 54.5                              | 18.7                        | 72419                                    | 2831                              | 1902                              | No                  |
| PDGFB                       | SPGGSQEQR      | Yes                       | 473.22                         | 303.2                         | 5.24                                | 62                                | 29.3                        | 22973                                    | ND                                | ND                                | No                  |
| PDGFB                       | SPGGSQEQR      | Yes                       | 473.22                         | 647.3                         | 5.24                                | 62                                | 23.3                        | 3409                                     | ND                                | ND                                | No                  |
| PDGFB                       | SPGGSQEQR      | Yes                       | 473.22                         | 704.3                         | 5.24                                | 62                                | 23.3                        | 5151                                     | ND                                | ND                                | No                  |
| PDGFB                       | SPGGSQEQR      | Yes                       | 473.22                         | 761.4                         | 5.24                                | 62                                | 29.3                        | 56927                                    | ND                                | ND                                | No                  |
| PDGFD                       | DTSATPQSASIK   | Yes                       | 603.3                          | 476.2                         | 6.98                                | 78.8                              | 26                          | 280068                                   | ND                                | ND                                | No                  |
| PDGFD                       | DTSATPQSASIK   | Yes                       | 603.3                          | 730.4                         | 6.98                                | 78.8                              | 29                          | 519466                                   | ND                                | ND                                | No                  |
| PDGFD                       | DTSATPQSASIK   | Yes                       | 603.3                          | 831.5                         | 6.98                                | 78.8                              | 29                          | 205056                                   | ND                                | ND                                | No                  |
| PDGFD                       | DTSATPQSASIK   | Yes                       | 603.3                          | 989.5                         | 6.98                                | 78.8                              | 29                          | 80896                                    | ND                                | ND                                | No                  |
| PDGFD                       | GNGYVQSPR      | No                        |                                |                               |                                     |                                   |                             |                                          |                                   |                                   |                     |
| PDGFD                       | LANVVFPPR      | Yes                       | 531.81                         | 566.3                         | 18.36                               | 69.6                              | 25.9                        | 81235                                    | ND                                | ND                                | No                  |
| PDGFD                       | LANVVFPPR      | Yes                       | 531.81                         | 665.4                         | 18.36                               | 69.6                              | 25.9                        | 83697                                    | ND                                | ND                                | No                  |
| PDGFD                       | LANVVFPPR      | Yes                       | 531.81                         | 791.4                         | 18.36                               | 69.6                              | 25.9                        | ND                                       | ND                                | ND                                | No                  |
| PDGFD                       | LANVVFPPR      | Yes                       | 531.81                         | 878.5                         | 18.36                               | 69.6                              | 22.9                        | 23640                                    | ND                                | ND                                | No                  |
| PDGFD                       | SDDYFVAKPGFK   | Yes                       | 687.34                         | 448.3                         | 13.08                               | 89.7                              | 41.7                        | 379278                                   | ND                                | ND                                | No                  |

**Table S5.** MRM assay of individual proteins.

| Protein<br>(_HUMAN) | Peptide                         | MS/MS<br>spectrum | Precursor ion<br>(m/z) | Fragment ion<br>(m/z) | Retention time<br>(minutes) | Declustering<br>potential | Collision<br>energy | Area of<br>synthetic<br>peptide | Area in control<br>sample | Area in disease<br>sample | Interference |
|---------------------|---------------------------------|-------------------|------------------------|-----------------------|-----------------------------|---------------------------|---------------------|---------------------------------|---------------------------|---------------------------|--------------|
| PDGFD               | SDDYFVAKPGFK                    | Yes               | 687.34                 | 647.4                 | 13.08                       | 89.7                      | 35.7                | 90388                           | ND                        | ND                        | No           |
| PDGFD               | SDDYFVAKPGFK                    | Yes               | 687.34                 | 746.5                 | 13.08                       | 89.7                      | 35.7                | 120129                          | ND                        | ND                        | No           |
| PDGFD               | SDDYFVAKPGFK                    | Yes               | 687.34                 | 893.5                 | 13.08                       | 89.7                      | 35.7                | 64255                           | ND                        | ND                        | No           |
| PDGFD               | YDFVEVEDISETSTIIR               | No                |                        |                       |                             |                           |                     |                                 |                           |                           |              |
| PDIA3               | DPNIVIAK                        | Yes               | 435.26                 | 327.1                 | 10.38                       | 57.1                      | 24.7                | 71278                           | ND                        | ND                        | No           |
| PDIA3               | DPNIVIAK                        | Yes               | 435.26                 | 331.2                 | 10.38                       | 57.1                      | 24.7                | 102404                          | ND                        | ND                        | No           |
| PDIA3               | DPNIVIAK                        | Yes               | 435.26                 | 543.4                 | 10.38                       | 57.1                      | 24.7                | 31792                           | ND                        | ND                        | No           |
| PDIA3               | DPNIVIAK                        | Yes               | 435.26                 | 657.4                 | 10.38                       | 57.1                      | 21.7                | 47949                           | ND                        | ND                        | No           |
| PDIA3               | ELSDFISYLQR                     | Yes               | 685.85                 | 416.3                 | 21.41                       | 89.5                      | 29.7                | 31061                           | 4631                      | 5077                      | No           |
| PDIA3               | ELSDFISYLQR                     | Yes               | 685.85                 | 579.3                 | 21.41                       | 89.5                      | 29.7                | 28683                           | 4721                      | 9583                      | No           |
| PDIA3               | ELSDFISYLQR                     | Yes               | 685.85                 | 779.4                 | 21.41                       | 89.5                      | 29.7                | 57622                           | 11620                     | 15477                     | No           |
| PDIA3               | ELSDFISYLQR                     | Yes               | 685.85                 | 926.5                 | 21.41                       | 89.5                      | 41.7                | 23290                           | 5200                      | 5652                      | No           |
| PDIA3               | FAHTNVESLVNEYDDNGEGIILFRPSHLTNK | No                |                        |                       |                             |                           |                     |                                 |                           |                           |              |
| PDIA3               | SEPIPESNDGPVK                   | Yes               | 684.84                 | 314.1                 | 9.23                        | 89.3                      | 32.6                | 395195                          | ND                        | ND                        | No           |
| PDIA3               | SEPIPESNDGPVK                   | Yes               | 684.84                 | 400.3                 | 9.23                        | 89.3                      | 41.6                | 200287                          | ND                        | ND                        | No           |
| PDIA3               | SEPIPESNDGPVK                   | Yes               | 684.84                 | 427.2                 | 9.23                        | 89.3                      | 29.6                | 345793                          | ND                        | ND                        | No           |
| PDIA3               | SEPIPESNDGPVK                   | Yes               | 684.84                 | 942.5                 | 9.23                        | 89.3                      | 32.6                | 445313                          | ND                        | ND                        | No           |
| PDIA3               | TVAYTEQK                        | Yes               | 470.24                 | 505.3                 | 6.22                        | 61.7                      | 26.2                | 96506                           | ND                        | ND                        | No           |
| PDIA3               | TVAYTEQK                        | Yes               | 470.24                 | 668.3                 | 6.22                        | 61.7                      | 23.2                | 96210                           | ND                        | ND                        | No           |
| PDIA3               | TVAYTEQK                        | Yes               | 470.24                 | 739.4                 | 6.22                        | 61.7                      | 23.2                | 727437                          | ND                        | ND                        | No           |
| PDIA3               | TVAYTEQK                        | Yes               | 470.24                 | 838.4                 | 6.22                        | 61.7                      | 20.2                | 12172                           | ND                        | ND                        | No           |
| PDIA4               | EENGVLVLNDANFDNFVADK            | No                |                        |                       |                             |                           |                     |                                 |                           |                           |              |
| PDIA4               | EVSQPDWTPPPEVTLVLTK             | No                |                        |                       |                             |                           |                     |                                 |                           |                           |              |

**Table S5.** MRM assay of individual proteins.

| Protein<br>(_HUMAN) | Peptide           | MS/MS<br>spectrum | Precursor ion<br>(m/z) | Fragment ion<br>(m/z) | Retention time<br>(minutes) | Declustering<br>potential | Collision<br>energy | Area of<br>synthetic<br>peptide | Area in control<br>sample | Area in disease<br>sample | Interference                           |
|---------------------|-------------------|-------------------|------------------------|-----------------------|-----------------------------|---------------------------|---------------------|---------------------------------|---------------------------|---------------------------|----------------------------------------|
| PDIA4               | FDVSGYPTIK        | Yes               | 563.79                 | 458.3                 | 14.32                       | 73.7                      | 36.3                | 650272                          | 16222                     | 28395                     | No                                     |
| PDIA4               | FDVSGYPTIK        | Yes               | 563.79                 | 678.4                 | 14.32                       | 73.7                      | 27.3                | 220607                          | 53579                     | 45605                     | Yes (Based on<br>Transition<br>Ratios) |
| PDIA4               | FDVSGYPTIK        | Yes               | 563.79                 | 765.4                 | 14.32                       | 73.7                      | 27.3                | 651232                          | 9515                      | 9889                      | Yes (Based on<br>Transition<br>Ratios) |
| PDIA4               | FDVSGYPTIK        | Yes               | 563.79                 | 864.5                 | 14.32                       | 73.7                      | 27.3                | 255678                          | 12697                     | 21505                     | No                                     |
| PDIA4               | FHHTFSTEIAK       | Yes               | 439.89                 | 285.1                 | 9.44                        | 57.7                      | 29                  | 84563                           | 5931                      | 9235                      | No                                     |
| PDIA4               | FHHTFSTEIAK       | Yes               | 439.89                 | 460.3                 | 9.44                        | 57.7                      | 23                  | 25165                           | ND                        | ND                        | No                                     |
| PDIA4               | FHHTFSTEIAK       | Yes               | 439.89                 | 561.3                 | 9.44                        | 57.7                      | 23                  | 41636                           | ND                        | ND                        | No                                     |
| PDIA4               | FHHTFSTEIAK       | Yes               | 439.89                 | 648.4                 | 9.44                        | 57.7                      | 20                  | 60091                           | 4621                      | 3895                      | No                                     |
| PDIA4               | FIEEHATK          | Yes               | 487.75                 | 456.3                 | 6.56                        | 63.9                      | 30                  | ND                              | 3464                      | 3956                      | Yes (Based on<br>Manual<br>Review)     |
| PDIA4               | FIEEHATK          | Yes               | 487.75                 | 585.3                 | 6.56                        | 63.9                      | 27                  | 46431                           | 1854                      | ND                        | No                                     |
| PDIA4               | FIEEHATK          | Yes               | 487.75                 | 714.3                 | 6.56                        | 63.9                      | 24                  | 211267                          | 2232                      | 924                       | No                                     |
| PDIA4               | FIEEHATK          | Yes               | 487.75                 | 827.4                 | 6.56                        | 63.9                      | 24                  | 31880                           | ND                        | ND                        | No                                     |
| PDIA6               | GESPVDYDGGR       | Yes               | 576.25                 | 682.3                 | 8.36                        | 75.3                      | 33.9                | 3571                            | ND                        | ND                        | No                                     |
| PDIA6               | GESPVDYDGGR       | Yes               | 576.25                 | 781.3                 | 8.36                        | 75.3                      | 33.9                | 2138                            | ND                        | ND                        | No                                     |
| PDIA6               | GESPVDYDGGR       | Yes               | 576.25                 | 878.4                 | 8.36                        | 75.3                      | 24.9                | 2862                            | ND                        | ND                        | No                                     |
| PDIA6               | GESPVDYDGGR       | Yes               | 576.25                 | 965.4                 | 8.36                        | 75.3                      | 30.9                | ND                              | ND                        | ND                        | No                                     |
| PDIA6               | HHSLGGQYGVQGFPTIK | Yes               | 609.32                 | 458.3                 | 14.15                       | 79.6                      | 37.6                | 70364                           | ND                        | ND                        | No                                     |
| PDIA6               | HHSLGGQYGVQGFPTIK | Yes               | 609.32                 | 662.4                 | 14.15                       | 79.6                      | 28.6                | 53209                           | ND                        | ND                        | No                                     |
| PDIA6               | HHSLGGQYGVQGFPTIK | Yes               | 609.32                 | 717.3                 | 14.15                       | 79.6                      | 31.6                | 38917                           | ND                        | ND                        | No                                     |

**Table S5.** MRM assay of individual proteins.

| Protein<br>(_HUMAN) | Peptide           | MS/MS<br>spectrum | Precursor ion<br>(m/z) | Fragment ion<br>(m/z) | Retention time<br>(minutes) | Declustering<br>potential | Collision<br>energy | Area of<br>synthetic<br>peptide | Area in control<br>sample | Area in disease<br>sample | Interference |
|---------------------|-------------------|-------------------|------------------------|-----------------------|-----------------------------|---------------------------|---------------------|---------------------------------|---------------------------|---------------------------|--------------|
| PDIA6               | HHSLGGQYGVQGFPTIK | Yes               | 609.32                 | 790.4                 | 14.15                       | 79.6                      | 28.6                | 38280                           | ND                        | ND                        | No           |
| PDIA6               | NLEPEWAAAASEVK    | Yes               | 757.88                 | 357.2                 | 16.69                       | 98.8                      | 32.8                | 66832                           | ND                        | ND                        | No           |
| PDIA6               | NLEPEWAAAASEVK    | Yes               | 757.88                 | 533.3                 | 16.69                       | 98.8                      | 41.8                | 5852                            | ND                        | ND                        | No           |
| PDIA6               | NLEPEWAAAASEVK    | Yes               | 757.88                 | 675.4                 | 16.69                       | 98.8                      | 44.8                | 10088                           | ND                        | ND                        | No           |
| PDIA6               | NLEPEWAAAASEVK    | Yes               | 757.88                 | 932.5                 | 16.69                       | 98.8                      | 44.8                | 5699                            | ND                        | ND                        | No           |
| PDIA6               | NRPEDYQGGR        | Yes               | 596.28                 | 271.2                 | 5.56                        | 77.9                      | 34.7                | 7849                            | ND                        | ND                        | No           |
| PDIA6               | NRPEDYQGGR        | Yes               | 596.28                 | 497.2                 | 5.56                        | 77.9                      | 34.7                | 2458                            | ND                        | ND                        | No           |
| PDIA6               | NRPEDYQGGR        | Yes               | 596.28                 | 695.3                 | 5.56                        | 77.9                      | 34.7                | ND                              | ND                        | ND                        | No           |
| PDIA6               | NRPEDYQGGR        | Yes               | 596.28                 | 921.4                 | 5.56                        | 77.9                      | 37.7                | 8051                            | ND                        | ND                        | No           |
| PDIA6               | NSYLEVLLK         | Yes               | 539.81                 | 472.3                 | 20.20                       | 70.6                      | 32.3                | 28962                           | ND                        | ND                        | No           |
| PDIA6               | NSYLEVLLK         | Yes               | 539.81                 | 601.4                 | 20.20                       | 70.6                      | 26.3                | 68882                           | ND                        | ND                        | No           |
| PDIA6               | NSYLEVLLK         | Yes               | 539.81                 | 714.5                 | 20.20                       | 70.6                      | 26.3                | 113961                          | ND                        | ND                        | No           |
| PDIA6               | NSYLEVLLK         | Yes               | 539.81                 | 877.5                 | 20.20                       | 70.6                      | 23.3                | 71864                           | ND                        | ND                        | No           |
| PECA1               | DQNFVILEFPVEEQDR  | Yes               | 989.48                 | 358.1                 | 22.19                       | 128.6                     | 55                  | 5273                            | ND                        | ND                        | No           |
| PECA1               | DQNFVILEFPVEEQDR  | Yes               | 989.48                 | 505.2                 | 22.19                       | 128.6                     | 43                  | 5017                            | ND                        | ND                        | No           |
| PECA1               | DQNFVILEFPVEEQDR  | Yes               | 989.48                 | 604.3                 | 22.19                       | 128.6                     | 43                  | 4604                            | ND                        | ND                        | No           |
| PECA1               | DQNFVILEFPVEEQDR  | Yes               | 989.48                 | 872.4                 | 22.19                       | 128.6                     | 46                  | 6153                            | ND                        | ND                        | No           |
| PECA1               | EDTIVSQTQDFTK     | Yes               | 756.37                 | 346.1                 | 13.27                       | 98.6                      | 41.8                | 17231                           | ND                        | ND                        | No           |
| PECA1               | EDTIVSQTQDFTK     | Yes               | 756.37                 | 510.3                 | 13.27                       | 98.6                      | 44.8                | 3848                            | ND                        | ND                        | No           |
| PECA1               | EDTIVSQTQDFTK     | Yes               | 756.37                 | 867.4                 | 13.27                       | 98.6                      | 35.8                | 1596                            | ND                        | ND                        | No           |
| PECA1               | EDTIVSQTQDFTK     | Yes               | 756.37                 | 954.5                 | 13.27                       | 98.6                      | 38.8                | 10633                           | ND                        | ND                        | No           |
| PECA1               | SELVTVTESFSTPK    | Yes               | 762.89                 | 330.2                 | 16.40                       | 99.4                      | 36.1                | 112887                          | ND                        | ND                        | No           |
| PECA1               | SELVTVTESFSTPK    | Yes               | 762.89                 | 429.2                 | 16.40                       | 99.4                      | 33.1                | 30216                           | ND                        | ND                        | No           |

**Table S5.** MRM assay of individual proteins.

| Protein<br>(_HUMAN) | Peptide          | MS/MS<br>spectrum | Precursor ion<br>(m/z) | Fragment ion<br>(m/z) | Retention time<br>(minutes) | Decustering<br>potential | Collision<br>energy | Area of<br>synthetic<br>peptide | Area in control<br>sample | Area in disease<br>sample | Interference |
|---------------------|------------------|-------------------|------------------------|-----------------------|-----------------------------|--------------------------|---------------------|---------------------------------|---------------------------|---------------------------|--------------|
| PECA1               | SELVTVTESFSTPK   | Yes               | 762.89                 | 896.4                 | 16.40                       | 99.4                     | 33.1                | 16580                           | ND                        | ND                        | No           |
| PECA1               | SELVTVTESFSTPK   | Yes               | 762.89                 | 995.5                 | 16.40                       | 99.4                     | 36.1                | 7480                            | ND                        | ND                        | No           |
| PECA1               | STESYFIPEVR      | Yes               | 664.33                 | 500.3                 | 16.40                       | 86.7                     | 31.7                | 78886                           | ND                        | ND                        | No           |
| PECA1               | STESYFIPEVR      | Yes               | 664.33                 | 613.4                 | 16.40                       | 86.7                     | 31.7                | 20436                           | ND                        | ND                        | No           |
| PECA1               | STESYFIPEVR      | Yes               | 664.33                 | 760.4                 | 16.40                       | 86.7                     | 40.7                | 32123                           | ND                        | ND                        | No           |
| PECA1               | STESYFIPEVR      | Yes               | 664.33                 | 923.5                 | 16.40                       | 86.7                     | 40.7                | 6542                            | ND                        | ND                        | No           |
| PECA1               | VIAPVDEVQISILSSK | Yes               | 849.49                 | 434.3                 | 20.03                       | 110.6                    | 45.9                | 15708                           | ND                        | ND                        | No           |
| PECA1               | VIAPVDEVQISILSSK | Yes               | 849.49                 | 634.4                 | 20.03                       | 110.6                    | 48.9                | 22340                           | ND                        | ND                        | No           |
| PECA1               | VIAPVDEVQISILSSK | Yes               | 849.49                 | 747.5                 | 20.03                       | 110.6                    | 48.9                | 14905                           | ND                        | ND                        | No           |
| PECA1               | VIAPVDEVQISILSSK | Yes               | 849.49                 | 875.5                 | 20.03                       | 110.6                    | 42.9                | 17371                           | ND                        | ND                        | No           |
| PEDF                | DTDTGALLFIGK     | Yes               | 417.56                 | 317.2                 | 18.84                       | 54.9                     | 15.8                | 7801                            | 80115                     | 89177                     | No           |
| PEDF                | DTDTGALLFIGK     | Yes               | 417.56                 | 464.3                 | 18.84                       | 54.9                     | 18.8                | 24294                           | 228559                    | 278980                    | No           |
| PEDF                | DTDTGALLFIGK     | Yes               | 417.56                 | 561.2                 | 18.84                       | 54.9                     | 21.8                | 10270                           | 118810                    | 132598                    | No           |
| PEDF                | DTDTGALLFIGK     | Yes               | 417.56                 | 577.4                 | 18.84                       | 54.9                     | 15.8                | 11929                           | 142253                    | 169729                    | No           |
| PEDF                | ELLDTVTAPQK      | Yes               | 607.84                 | 372.2                 | 12.50                       | 79.4                     | 38.2                | 1756990                         | 196476                    | 258025                    | No           |
| PEDF                | ELLDTVTAPQK      | Yes               | 607.84                 | 544.3                 | 12.50                       | 79.4                     | 29.2                | 554696                          | 75290                     | 73789                     | No           |
| PEDF                | ELLDTVTAPQK      | Yes               | 607.84                 | 859.5                 | 12.50                       | 79.4                     | 29.2                | 462839                          | 65310                     | 72966                     | No           |
| PEDF                | ELLDTVTAPQK      | Yes               | 607.84                 | 972.5                 | 12.50                       | 79.4                     | 29.2                | 188955                          | 23100                     | 32983                     | No           |
| PEDF                | LQSLFDSPDFSK     | Yes               | 692.34                 | 329.2                 | 17.88                       | 90.3                     | 33                  | 397596                          | 1234166                   | 1527847                   | No           |
| PEDF                | LQSLFDSPDFSK     | Yes               | 692.34                 | 593.3                 | 17.88                       | 90.3                     | 42                  | 367525                          | 1227194                   | 1519981                   | No           |
| PEDF                | LQSLFDSPDFSK     | Yes               | 692.34                 | 795.4                 | 17.88                       | 90.3                     | 33                  | 249855                          | 816699                    | 1001342                   | No           |
| PEDF                | LQSLFDSPDFSK     | Yes               | 692.34                 | 942.4                 | 17.88                       | 90.3                     | 33                  | 216281                          | 731379                    | 878393                    | No           |
| PEDF                | LSYEGEVTK        | Yes               | 513.26                 | 533.3                 | 9.08                        | 67.2                     | 25.1                | 319573                          | 687484                    | 889962                    | No           |

**Table S5.** MRM assay of individual proteins.

| Protein<br>(_HUMAN) | Peptide      | MS/MS<br>spectrum | Precursor ion<br>(m/z) | Fragment ion<br>(m/z) | Retention time<br>(minutes) | Declustering<br>potential | Collision<br>energy | Area of<br>synthetic<br>peptide | Area in control<br>sample | Area in disease<br>sample | Interference |
|---------------------|--------------|-------------------|------------------------|-----------------------|-----------------------------|---------------------------|---------------------|---------------------------------|---------------------------|---------------------------|--------------|
| PEDF                | LSYEGEVTK    | Yes               | 513.26                 | 662.3                 | 9.08                        | 67.2                      | 25.1                | 289821                          | 568465                    | 748021                    | No           |
| PEDF                | LSYEGEVTK    | Yes               | 513.26                 | 825.4                 | 9.08                        | 67.2                      | 25.1                | 669677                          | 1408785                   | 1867390                   | No           |
| PEDF                | LSYEGEVTK    | Yes               | 513.26                 | 912.4                 | 9.08                        | 67.2                      | 25.1                | 322195                          | 646303                    | 777990                    | No           |
| PEDF                | TVQAVLTPVK   | Yes               | 528.33                 | 557.4                 | 13.16                       | 69.2                      | 25.7                | 131486                          | 740145                    | 850267                    | No           |
| PEDF                | TVQAVLTPVK   | Yes               | 528.33                 | 656.4                 | 13.16                       | 69.2                      | 25.7                | 74854                           | 453188                    | 471248                    | No           |
| PEDF                | TVQAVLTPVK   | Yes               | 528.33                 | 727.5                 | 13.16                       | 69.2                      | 25.7                | 204094                          | 997642                    | 1255095                   | No           |
| PEDF                | TVQAVLTPVK   | Yes               | 528.33                 | 855.5                 | 13.16                       | 69.2                      | 25.7                | 227455                          | 1386036                   | 1625205                   | No           |
| PERM                | AVSNEIVR     | Yes               | 444.25                 | 387.3                 | 8.41                        | 58.3                      | 28                  | 16180                           | ND                        | ND                        | No           |
| PERM                | AVSNEIVR     | Yes               | 444.25                 | 516.3                 | 8.41                        | 58.3                      | 31                  | 12593                           | ND                        | ND                        | No           |
| PERM                | AVSNEIVR     | Yes               | 444.25                 | 630.4                 | 8.41                        | 58.3                      | 28                  | 14028                           | ND                        | ND                        | No           |
| PERM                | AVSNEIVR     | Yes               | 444.25                 | 717.4                 | 8.41                        | 58.3                      | 22                  | 110523                          | ND                        | ND                        | No           |
| PERM                | FPTDQLTPDQER | Yes               | 723.85                 | 461.2                 | 11.81                       | 94.4                      | 37.3                | 21022                           | ND                        | ND                        | No           |
| PERM                | FPTDQLTPDQER | Yes               | 723.85                 | 644.3                 | 11.81                       | 94.4                      | 43.3                | 112526                          | ND                        | ND                        | No           |
| PERM                | FPTDQLTPDQER | Yes               | 723.85                 | 745.3                 | 11.81                       | 94.4                      | 43.3                | 63232                           | ND                        | ND                        | No           |
| PERM                | FPTDQLTPDQER | Yes               | 723.85                 | 858.4                 | 11.81                       | 94.4                      | 43.3                | 32448                           | ND                        | ND                        | No           |
| PERM                | IANVFTNAFR   | Yes               | 576.81                 | 608.3                 | 18.47                       | 75.4                      | 27.9                | 37737                           | ND                        | ND                        | No           |
| PERM                | IANVFTNAFR   | Yes               | 576.81                 | 755.4                 | 18.47                       | 75.4                      | 27.9                | 76732                           | ND                        | ND                        | No           |
| PERM                | IANVFTNAFR   | Yes               | 576.81                 | 854.5                 | 18.47                       | 75.4                      | 36.9                | 11535                           | ND                        | ND                        | No           |
| PERM                | IANVFTNAFR   | Yes               | 576.81                 | 968.5                 | 18.47                       | 75.4                      | 27.9                | 17327                           | ND                        | ND                        | No           |
| PERM                | VFFASWR      | Yes               | 456.74                 | 361.2                 | 18.11                       | 59.9                      | 31.6                | 13623                           | ND                        | ND                        | No           |
| PERM                | VFFASWR      | Yes               | 456.74                 | 519.3                 | 18.11                       | 59.9                      | 22.6                | 70069                           | ND                        | ND                        | No           |
| PERM                | VFFASWR      | Yes               | 456.74                 | 666.3                 | 18.11                       | 59.9                      | 22.6                | 170500                          | ND                        | ND                        | No           |
| PERM                | VFFASWR      | Yes               | 456.74                 | 813.4                 | 18.11                       | 59.9                      | 31.6                | 26055                           | ND                        | ND                        | No           |

**Table S5.** MRM assay of individual proteins.

| Protein<br>(_HUMAN) | Peptide                | MS/MS<br>spectrum | Precursor ion<br>(m/z) | Fragment ion<br>(m/z) | Retention time<br>(minutes) | Declustering<br>potential | Collision<br>energy | Area of<br>synthetic<br>peptide | Area in control<br>sample | Area in disease<br>sample | Interference |
|---------------------|------------------------|-------------------|------------------------|-----------------------|-----------------------------|---------------------------|---------------------|---------------------------------|---------------------------|---------------------------|--------------|
| PERM                | VVLEGGIDPILR           | Yes               | 640.88                 | 312.2                 | 17.89                       | 83.7                      | 30.7                | 228040                          | ND                        | ND                        | No           |
| PERM                | VVLEGGIDPILR           | Yes               | 640.88                 | 613.4                 | 17.89                       | 83.7                      | 30.7                | 154669                          | ND                        | ND                        | No           |
| PERM                | VVLEGGIDPILR           | Yes               | 640.88                 | 840.5                 | 17.89                       | 83.7                      | 30.7                | 395655                          | ND                        | ND                        | No           |
| PERM                | VVLEGGIDPILR           | Yes               | 640.88                 | 969.5                 | 17.89                       | 83.7                      | 30.7                | 155222                          | ND                        | ND                        | No           |
| PERP1               | LSLPLLLLLLGAWAIPGGLGDR | Yes               | 753.46                 | 671.3                 | 24.79                       | 98.2                      | 33                  | 12823                           | ND                        | ND                        | No           |
| PERP1               | LSLPLLLLLLGAWAIPGGLGDR | Yes               | 753.46                 | 784.4                 | 24.79                       | 98.2                      | 39                  | 4320                            | ND                        | ND                        | No           |
| PERP1               | LSLPLLLLLLGAWAIPGGLGDR | Yes               | 753.46                 | 855.5                 | 24.79                       | 98.2                      | 33                  | 3046                            | ND                        | ND                        | No           |
| PERP1               | LSLPLLLLLLGAWAIPGGLGDR | Yes               | 753.46                 | 863.6                 | 24.79                       | 98.2                      | 39                  | ND                              | ND                        | ND                        | No           |
| PERP1               | NWQDYGVR               | Yes               | 519.24                 | 429.2                 | 11.95                       | 68                        | 31.3                | 4976                            | ND                        | ND                        | No           |
| PERP1               | NWQDYGVR               | Yes               | 519.24                 | 494.3                 | 11.95                       | 68                        | 34.3                | 37992                           | ND                        | ND                        | No           |
| PERP1               | NWQDYGVR               | Yes               | 519.24                 | 609.3                 | 11.95                       | 68                        | 28.3                | 19972                           | ND                        | ND                        | No           |
| PERP1               | NWQDYGVR               | Yes               | 519.24                 | 737.4                 | 11.95                       | 68                        | 25.3                | 25334                           | ND                        | ND                        | No           |
| PGAM1               | ALPFWNEEIVPQIK         | Yes               | 842.5                  | 1069.6                | 24.60                       | 100                       | 42.6                | ND                              | 28379                     | 21397                     | No           |
| PGAM1               | ALPFWNEEIVPQIK         | Yes               | 842.5                  | 485.3                 | 24.60                       | 100                       | 42.6                | ND                              | 28143                     | 26612                     | No           |
| PGAM1               | ALPFWNEEIVPQIK         | Yes               | 842.5                  | 584.4                 | 24.60                       | 100                       | 42.6                | ND                              | 16179                     | 13220                     | No           |
| PGAM1               | ALPFWNEEIVPQIK         | Yes               | 842.5                  | 750.4                 | 24.60                       | 100                       | 42.6                | ND                              | ND                        | ND                        | No           |
| PGAM1               | AMEAVAAQ GK            | Yes               | 488.2                  | 403.2                 | 9.60                        | 100                       | 27                  | ND                              | 13582                     | 19536                     | No           |
| PGAM1               | AMEAVAAQ GK            | Yes               | 488.2                  | 474.3                 | 9.60                        | 100                       | 27                  | ND                              | 4146                      | 4002                      | No           |
| PGAM1               | AMEAVAAQ GK            | Yes               | 488.2                  | 644.3                 | 9.60                        | 100                       | 27                  | ND                              | 6004                      | 11099                     | No           |
| PGAM1               | AMEAVAAQ GK            | Yes               | 488.2                  | 773.4                 | 9.60                        | 100                       | 27                  | ND                              | 7541                      | 10827                     | No           |
| PGAM1               | FSGWYDADLSPAGHEEAK     | Yes               | 660.6                  | 419.7                 | 17.40                       | 100                       | 34.2                | ND                              | ND                        | 3992                      | No           |
| PGAM1               | FSGWYDADLSPAGHEEAK     | Yes               | 660.6                  | 613.3                 | 17.40                       | 100                       | 34.2                | ND                              | 41338                     | 39525                     | No           |
| PGAM1               | FSGWYDADLSPAGHEEAK     | Yes               | 660.6                  | 838.4                 | 17.40                       | 100                       | 34.2                | ND                              | 6760                      | 9931                      | No           |

**Table S5.** MRM assay of individual proteins.

| Protein<br>(_HUMAN) | Peptide                   | MS/MS<br>spectrum | Precursor ion<br>(m/z) | Fragment ion<br>(m/z) | Retention time<br>(minutes) | Declustering<br>potential | Collision<br>energy | Area of<br>synthetic<br>peptide | Area in control<br>sample | Area in disease<br>sample | Interference |
|---------------------|---------------------------|-------------------|------------------------|-----------------------|-----------------------------|---------------------------|---------------------|---------------------------------|---------------------------|---------------------------|--------------|
| PGAM1               | FSGWYDADLSPAGHEEAK        | Yes               | 990.4                  | 1038.5                | 17.40                       | 100                       | 49.1                | ND                              | 53872                     | 56447                     | No           |
| PGAM1               | FSGWYDADLSPAGHEEAK        | Yes               | 990.4                  | 1153.6                | 17.40                       | 100                       | 49.1                | ND                              | ND                        | ND                        | No           |
| PGAM1               | FSGWYDADLSPAGHEEAK        | Yes               | 990.4                  | 838.4                 | 17.40                       | 100                       | 49.1                | ND                              | ND                        | ND                        | No           |
| PGAM1               | FSGWYDADLSPAGHEEAK        | Yes               | 990.4                  | 925.4                 | 17.40                       | 100                       | 49.1                | ND                              | 3349                      | 3362                      | No           |
| PGAM1               | HGESAWNLENR               | Yes               | 656.8                  | 1175.5                | 10.06                       | 100                       | 34.4                | ND                              | ND                        | ND                        | No           |
| PGAM1               | HGESAWNLENR               | Yes               | 656.8                  | 289.2                 | 10.06                       | 100                       | 40.4                | ND                              | ND                        | ND                        | No           |
| PGAM1               | HGESAWNLENR               | Yes               | 656.8                  | 831.4                 | 10.06                       | 100                       | 34.4                | ND                              | ND                        | ND                        | No           |
| PGAM1               | HGESAWNLENR               | Yes               | 656.8                  | 989.5                 | 10.06                       | 100                       | 40.4                | ND                              | ND                        | ND                        | No           |
| PGAM1               | NLKPIKPMQFLGDEETVR        | Yes               | 705.7                  | 633.3                 | 26.20                       | 100                       | 36.5                | ND                              | ND                        | ND                        | No           |
| PGAM1               | NLKPIKPMQFLGDEETVR        | Yes               | 705.7                  | 748.3                 | 26.20                       | 100                       | 36.5                | ND                              | ND                        | ND                        | No           |
| PGAM1               | NLKPIKPMQFLGDEETVR        | Yes               | 705.7                  | 805.4                 | 26.20                       | 100                       | 36.5                | ND                              | ND                        | ND                        | No           |
| PGAM1               | NLKPIKPMQFLGDEETVR        | Yes               | 705.7                  | 918.5                 | 26.20                       | 100                       | 36.5                | ND                              | ND                        | ND                        | No           |
| PLAC1               | No peptide                |                   |                        |                       |                             |                           |                     |                                 |                           |                           |              |
| PLACL               | IHTYVYEFIYLVR             | No                |                        |                       |                             |                           |                     |                                 |                           |                           |              |
| PLACL               | LDPSPIADFQTTAEELGLLSSPNLL | No                |                        |                       |                             |                           |                     |                                 |                           |                           |              |
| PLACL               | VVSEETLLFQTELYFTPR        | No                |                        |                       |                             |                           |                     |                                 |                           |                           |              |
| PLIN2               | DAVTTTVTGAK               | Yes               | 532.29                 | 576.3                 | 8.47                        | 69.7                      | 28.9                | 260657                          | ND                        | ND                        | No           |
| PLIN2               | DAVTTTVTGAK               | Yes               | 532.29                 | 677.4                 | 8.47                        | 69.7                      | 25.9                | 438190                          | ND                        | ND                        | No           |
| PLIN2               | DAVTTTVTGAK               | Yes               | 532.29                 | 778.4                 | 8.47                        | 69.7                      | 25.9                | 1401979                         | ND                        | ND                        | No           |
| PLIN2               | DAVTTTVTGAK               | Yes               | 532.29                 | 877.5                 | 8.47                        | 69.7                      | 25.9                | 166067                          | ND                        | ND                        | No           |
| PLIN2               | EVSDSLLTSSK               | Yes               | 583.3                  | 422.2                 | 11.39                       | 76.2                      | 28.2                | 441447                          | ND                        | ND                        | No           |
| PLIN2               | EVSDSLLTSSK               | Yes               | 583.3                  | 535.3                 | 11.39                       | 76.2                      | 28.2                | 301728                          | ND                        | ND                        | No           |
| PLIN2               | EVSDSLLTSSK               | Yes               | 583.3                  | 735.4                 | 11.39                       | 76.2                      | 28.2                | 157351                          | ND                        | ND                        | No           |



**Table S5.** MRM assay of individual proteins.

| Protein<br>(_HUMAN) | Peptide            | MS/MS<br>spectrum | Precursor ion<br>(m/z) | Fragment ion<br>(m/z) | Retention time<br>(minutes) | Declustering<br>potential | Collision<br>energy | Area of<br>synthetic<br>peptide | Area in control<br>sample | Area in disease<br>sample | Interference |
|---------------------|--------------------|-------------------|------------------------|-----------------------|-----------------------------|---------------------------|---------------------|---------------------------------|---------------------------|---------------------------|--------------|
| PLIN2               | EVSDSLLTSSK        | Yes               | 583.3                  | 937.5                 | 11.39                       | 76.2                      | 28.2                | 231181                          | ND                        | ND                        | No           |
| PLIN2               | LPILNQPSTQIVANAK   | Yes               | 853.99                 | 324.2                 | 15.59                       | 111.2                     | 46.1                | 56414                           | ND                        | ND                        | No           |
| PLIN2               | LPILNQPSTQIVANAK   | Yes               | 853.99                 | 403.2                 | 15.59                       | 111.2                     | 43.1                | 17620                           | ND                        | ND                        | No           |
| PLIN2               | LPILNQPSTQIVANAK   | Yes               | 853.99                 | 551.4                 | 15.59                       | 111.2                     | 43.1                | 9157                            | ND                        | ND                        | No           |
| PLIN2               | LPILNQPSTQIVANAK   | Yes               | 853.99                 | 679.4                 | 15.59                       | 111.2                     | 43.1                | 16886                           | ND                        | ND                        | No           |
| PLIN2               | SELLVEQYLPLTEEELEK | Yes               | 1081.56                | 330.2                 | 23.37                       | 140.5                     | 59.1                | 29784                           | ND                        | ND                        | No           |
| PLIN2               | SELLVEQYLPLTEEELEK | Yes               | 1081.56                | 443.3                 | 23.37                       | 140.5                     | 50.1                | 16138                           | ND                        | ND                        | No           |
| PLIN2               | SELLVEQYLPLTEEELEK | Yes               | 1081.56                | 542.3                 | 23.37                       | 140.5                     | 47.1                | 10806                           | ND                        | ND                        | No           |
| PLIN2               | SELLVEQYLPLTEEELEK | Yes               | 1081.56                | 962.5                 | 23.37                       | 140.5                     | 47.1                | 5724                            | ND                        | ND                        | No           |
| PLIN2               | SVVSGSINTVLGSR     | Yes               | 688.38                 | 319.2                 | 16.02                       | 89.8                      | 32.8                | 16370                           | ND                        | ND                        | No           |
| PLIN2               | SVVSGSINTVLGSR     | Yes               | 688.38                 | 432.3                 | 16.02                       | 89.8                      | 32.8                | 15171                           | ND                        | ND                        | No           |
| PLIN2               | SVVSGSINTVLGSR     | Yes               | 688.38                 | 746.4                 | 16.02                       | 89.8                      | 41.8                | 14498                           | ND                        | ND                        | No           |
| PLIN2               | SVVSGSINTVLGSR     | Yes               | 688.38                 | 859.5                 | 16.02                       | 89.8                      | 41.8                | 3762                            | ND                        | ND                        | No           |
| PLIN3               | DTVATQLSEAVDATR    | Yes               | 526.27                 | 462.2                 | 16.76                       | 68.9                      | 24.4                | 21584                           | ND                        | ND                        | No           |
| PLIN3               | DTVATQLSEAVDATR    | Yes               | 526.27                 | 561.3                 | 16.76                       | 68.9                      | 24.4                | 13956                           | ND                        | ND                        | No           |
| PLIN3               | DTVATQLSEAVDATR    | Yes               | 526.27                 | 761.4                 | 16.76                       | 68.9                      | 33.4                | 5076                            | ND                        | ND                        | No           |
| PLIN3               | DTVATQLSEAVDATR    | Yes               | 526.27                 | 848.4                 | 16.76                       | 68.9                      | 33.4                | 4521                            | ND                        | ND                        | No           |
| PLIN3               | IATSLDGFDFVASVQQQR | Yes               | 917.97                 | 431.2                 | 16.40                       | 119.4                     | 48.9                | 8139                            | ND                        | ND                        | No           |
| PLIN3               | IATSLDGFDFVASVQQQR | Yes               | 917.97                 | 559.3                 | 16.40                       | 119.4                     | 42.9                | 19026                           | ND                        | ND                        | No           |
| PLIN3               | IATSLDGFDFVASVQQQR | Yes               | 917.97                 | 745.4                 | 16.40                       | 119.4                     | 39.9                | 20059                           | ND                        | ND                        | No           |
| PLIN3               | IATSLDGFDFVASVQQQR | Yes               | 917.97                 | 816.4                 | 16.40                       | 119.4                     | 42.9                | 23953                           | ND                        | ND                        | No           |
| PLIN3               | LEENLPILQQPTEK     | Yes               | 826.45                 | 474.3                 | 16.47                       | 107.6                     | 47.9                | 121563                          | ND                        | ND                        | No           |
| PLIN3               | LEENLPILQQPTEK     | Yes               | 826.45                 | 486.2                 | 16.47                       | 107.6                     | 38.9                | 51652                           | ND                        | ND                        | No           |

**Table S5.** MRM assay of individual proteins.

| Protein<br>(_HUMAN) | Peptide            | MS/MS<br>spectrum | Precursor ion<br>(m/z) | Fragment ion<br>(m/z) | Retention time<br>(minutes) | Declustering<br>potential | Collision<br>energy | Area of<br>synthetic<br>peptide | Area in control<br>sample | Area in disease<br>sample | Interference |
|---------------------|--------------------|-------------------|------------------------|-----------------------|-----------------------------|---------------------------|---------------------|---------------------------------|---------------------------|---------------------------|--------------|
| PLIN3               | LEENLPILQQPTEK     | Yes               | 826.45                 | 599.3                 | 16.47                       | 107.6                     | 35.9                | 107061                          | ND                        | ND                        | No           |
| PLIN3               | LEENLPILQQPTEK     | Yes               | 826.45                 | 730.4                 | 16.47                       | 107.6                     | 38.9                | 26625                           | ND                        | ND                        | No           |
| PLIN3               | SEEWADNHLPLTDAELAR | Yes               | 689.66                 | 346.1                 | 16.95                       | 90                        | 29.7                | 45976                           | ND                        | ND                        | No           |
| PLIN3               | SEEWADNHLPLTDAELAR | Yes               | 689.66                 | 559.3                 | 16.95                       | 90                        | 41.7                | 40894                           | ND                        | ND                        | No           |
| PLIN3               | SEEWADNHLPLTDAELAR | Yes               | 689.66                 | 775.4                 | 16.95                       | 90                        | 29.7                | 15104                           | ND                        | ND                        | No           |
| PLIN3               | SEEWADNHLPLTDAELAR | Yes               | 689.66                 | 985.5                 | 16.95                       | 90                        | 41.7                | 47412                           | ND                        | ND                        | No           |
| PLIN3               | TLTAAAVSGAQPILSK   | Yes               | 764.44                 | 999.6                 | 14.32                       | 99.6                      | 36.1                | 53601                           | ND                        | ND                        | No           |
| PLIN3               | TLTAAAVSGAQPILSK   | Yes               | 764.44                 | 557.4                 | 14.32                       | 99.6                      | 45.1                | 201537                          | ND                        | ND                        | No           |
| PLIN3               | TLTAAAVSGAQPILSK   | Yes               | 764.44                 | 813.5                 | 14.32                       | 99.6                      | 36.1                | 74745                           | ND                        | ND                        | No           |
| PLIN3               | TLTAAAVSGAQPILSK   | Yes               | 764.44                 | 900.5                 | 14.32                       | 99.6                      | 36.1                | 103522                          | ND                        | ND                        | No           |
| PLOD1               | AQVEEFQAQHGSEYQSVK | Yes               | 684                    | 299.2                 | 14.47                       | 89.2                      | 29.4                | 49127                           | ND                        | ND                        | No           |
| PLOD1               | AQVEEFQAQHGSEYQSVK | Yes               | 684                    | 333.2                 | 14.47                       | 89.2                      | 38.4                | 20133                           | ND                        | ND                        | No           |
| PLOD1               | AQVEEFQAQHGSEYQSVK | Yes               | 684                    | 624.3                 | 14.47                       | 89.2                      | 41.4                | 7557                            | ND                        | ND                        | No           |
| PLOD1               | AQVEEFQAQHGSEYQSVK | Yes               | 684                    | 897.4                 | 14.47                       | 89.2                      | 38.4                | 13781                           | ND                        | ND                        | No           |
| PLOD1               | IFQNLDGALDEVVLK    | Yes               | 837.46                 | 458.3                 | 22.05                       | 109                       | 48.3                | 31437                           | ND                        | ND                        | No           |
| PLOD1               | IFQNLDGALDEVVLK    | Yes               | 837.46                 | 503.3                 | 22.05                       | 109                       | 39.3                | 45552                           | ND                        | ND                        | No           |
| PLOD1               | IFQNLDGALDEVVLK    | Yes               | 837.46                 | 815.5                 | 22.05                       | 109                       | 39.3                | 48511                           | ND                        | ND                        | No           |
| PLOD1               | IFQNLDGALDEVVLK    | Yes               | 837.46                 | 943.5                 | 22.05                       | 109                       | 39.3                | 50095                           | ND                        | ND                        | No           |
| PLOD1               | LQLNYLGNYIPR       | No                |                        |                       |                             |                           |                     |                                 |                           |                           |              |
| PLOD1               | LTHYHEGLPTTR       | Yes               | 475.58                 | 377.2                 | 8.37                        | 62.3                      | 30.8                | 34804                           | ND                        | ND                        | No           |
| PLOD1               | LTHYHEGLPTTR       | Yes               | 475.58                 | 644.4                 | 8.37                        | 62.3                      | 30.8                | 11420                           | ND                        | ND                        | No           |
| PLOD1               | LTHYHEGLPTTR       | Yes               | 475.58                 | 838.4                 | 8.37                        | 62.3                      | 21.8                | 4445                            | ND                        | ND                        | No           |
| PLOD1               | LTHYHEGLPTTR       | Yes               | 475.58                 | 910.5                 | 8.37                        | 62.3                      | 18.8                | 2184                            | ND                        | ND                        | No           |

**Table S5.** MRM assay of individual proteins.

| Protein<br>(_HUMAN) | Peptide            | MS/MS<br>spectrum | Precursor ion<br>(m/z) | Fragment ion<br>(m/z) | Retention time<br>(minutes) | Declustering<br>potential | Collision<br>energy | Area of<br>synthetic<br>peptide | Area in control<br>sample | Area in disease<br>sample | Interference |
|---------------------|--------------------|-------------------|------------------------|-----------------------|-----------------------------|---------------------------|---------------------|---------------------------------|---------------------------|---------------------------|--------------|
| PLOD1               | NLAYDTLPVLIHGNGPTK | Yes               | 641.68                 | 299.2                 | 18.37                       | 83.8                      | 27.3                | 218140                          | ND                        | ND                        | No           |
| PLOD1               | NLAYDTLPVLIHGNGPTK | Yes               | 641.68                 | 573.3                 | 18.37                       | 83.8                      | 39.3                | 70120                           | ND                        | ND                        | No           |
| PLOD1               | NLAYDTLPVLIHGNGPTK | Yes               | 641.68                 | 710.4                 | 18.37                       | 83.8                      | 39.3                | 72542                           | ND                        | ND                        | No           |
| PLOD1               | NLAYDTLPVLIHGNGPTK | Yes               | 641.68                 | 823.4                 | 18.37                       | 83.8                      | 39.3                | 33657                           | ND                        | ND                        | No           |
| PLOD2               | IVGPEENLSQAEAR     | Yes               | 756.89                 | 375.2                 | 11.39                       | 98.6                      | 41.8                | 19496                           | ND                        | ND                        | No           |
| PLOD2               | IVGPEENLSQAEAR     | Yes               | 756.89                 | 574.3                 | 11.39                       | 98.6                      | 44.8                | 15836                           | ND                        | ND                        | No           |
| PLOD2               | IVGPEENLSQAEAR     | Yes               | 756.89                 | 661.3                 | 11.39                       | 98.6                      | 44.8                | 59996                           | ND                        | ND                        | No           |
| PLOD2               | IVGPEENLSQAEAR     | Yes               | 756.89                 | 888.5                 | 11.39                       | 98.6                      | 44.8                | 28623                           | ND                        | ND                        | No           |
| PLOD2               | IVQQWNLQDNDDQLFYTK | No                |                        |                       |                             |                           |                     |                                 |                           |                           |              |
| PLOD2               | LTHLHEGLPVK        | Yes               | 415.24                 | 343.2                 | 9.62                        | 54.6                      | 24.7                | 258869                          | ND                        | ND                        | No           |
| PLOD2               | LTHLHEGLPVK        | Yes               | 415.24                 | 513.3                 | 9.62                        | 54.6                      | 21.7                | 57036                           | ND                        | ND                        | No           |
| PLOD2               | LTHLHEGLPVK        | Yes               | 415.24                 | 779.4                 | 9.62                        | 54.6                      | 21.7                | 62603                           | ND                        | ND                        | No           |
| PLOD2               | LTHLHEGLPVK        | Yes               | 415.24                 | 901.5                 | 9.62                        | 54.6                      | 27.7                | ND                              | ND                        | ND                        | No           |
| PLOD2               | LWSNFWGALSPDGYAR   | Yes               | 1001.98                | 629.3                 | 24.48                       | 130.3                     | 55.6                | 22841                           | ND                        | ND                        | No           |
| PLOD2               | LWSNFWGALSPDGYAR   | Yes               | 1001.98                | 648.3                 | 24.48                       | 130.3                     | 43.6                | 8062                            | ND                        | ND                        | No           |
| PLOD2               | LWSNFWGALSPDGYAR   | Yes               | 1001.98                | 841.4                 | 24.48                       | 130.3                     | 43.6                | 22988                           | ND                        | ND                        | No           |
| PLOD2               | LWSNFWGALSPDGYAR   | Yes               | 1001.98                | 928.4                 | 24.48                       | 130.3                     | 43.6                | 18234                           | ND                        | ND                        | No           |
| PLOD2               | SEDYVDIVQGNR       | Yes               | 697.83                 | 332.1                 | 13.30                       | 91                        | 39.2                | 71789                           | ND                        | ND                        | No           |
| PLOD2               | SEDYVDIVQGNR       | Yes               | 697.83                 | 573.3                 | 13.30                       | 91                        | 33.2                | 29577                           | ND                        | ND                        | No           |
| PLOD2               | SEDYVDIVQGNR       | Yes               | 697.83                 | 801.4                 | 13.30                       | 91                        | 36.2                | 57702                           | ND                        | ND                        | No           |
| PLOD2               | SEDYVDIVQGNR       | Yes               | 697.83                 | 900.5                 | 13.30                       | 91                        | 42.2                | 12415                           | ND                        | ND                        | No           |
| PLSL                | IGNFSTDIK          | Yes               | 497.76                 | 563.3                 | 12.16                       | 65.2                      | 24.4                | 183136                          | ND                        | ND                        | No           |
| PLSL                | IGNFSTDIK          | Yes               | 497.76                 | 710.4                 | 12.16                       | 65.2                      | 24.4                | 68433                           | ND                        | ND                        | No           |

**Table S5.** MRM assay of individual proteins.

| Protein<br>(_HUMAN) | Peptide                | MS/MS<br>spectrum | Precursor ion<br>(m/z) | Fragment ion<br>(m/z) | Retention time<br>(minutes) | Declustering<br>potential | Collision<br>energy | Area of<br>synthetic<br>peptide | Area in control<br>sample | Area in disease<br>sample | Interference                       |
|---------------------|------------------------|-------------------|------------------------|-----------------------|-----------------------------|---------------------------|---------------------|---------------------------------|---------------------------|---------------------------|------------------------------------|
| PLSL                | IGNFSTDIK              | Yes               | 497.76                 | 824.4                 | 12.16                       | 65.2                      | 24.4                | 83963                           | ND                        | ND                        | No                                 |
| PLSL                | IGNFSTDIK              | Yes               | 497.76                 | 881.4                 | 12.16                       | 65.2                      | 24.4                | 143929                          | ND                        | ND                        | No                                 |
| PLSL                | ISFDEFIK               | Yes               | 499.76                 | 536.3                 | 19.34                       | 65.5                      | 27.5                | 48520                           | 1511                      | 3326                      | No                                 |
| PLSL                | ISFDEFIK               | Yes               | 499.76                 | 651.3                 | 19.34                       | 65.5                      | 24.5                | 72681                           | 6326                      | 2791                      | No                                 |
| PLSL                | ISFDEFIK               | Yes               | 499.76                 | 798.4                 | 19.34                       | 65.5                      | 24.5                | 407983                          | 28276                     | 23189                     | No                                 |
| PLSL                | ISFDEFIK               | Yes               | 499.76                 | 885.4                 | 19.34                       | 65.5                      | 24.5                | 330425                          | 12882                     | 14980                     | No                                 |
| PLSL                | VDTDGNGYISFNELNDFK     | Yes               | 1081.01                | 636.3                 | 24.35                       | 140.5                     | 59.1                | 8889                            | ND                        | ND                        | No                                 |
| PLSL                | VDTDGNGYISFNELNDFK     | Yes               | 1081.01                | 822.3                 | 24.35                       | 140.5                     | 47.1                | 7966                            | ND                        | ND                        | No                                 |
| PLSL                | VDTDGNGYISFNELNDFK     | Yes               | 1081.01                | 935.4                 | 24.35                       | 140.5                     | 47.1                | 5312                            | ND                        | ND                        | No                                 |
| PLSL                | VDTDGNGYISFNELNDFK     | Yes               | 1081.01                | 992.5                 | 24.35                       | 140.5                     | 50.1                | 7452                            | ND                        | ND                        | No                                 |
| PLSL                | VPVDWNR                | No                |                        |                       |                             |                           |                     |                                 |                           |                           |                                    |
| PLSL                | YPALHKPENQDIDWGALEGETR | Yes               | 847.08                 | 591.3                 | 16.08                       | 110.3                     | 40.8                | 1349                            | ND                        | ND                        | No                                 |
| PLSL                | YPALHKPENQDIDWGALEGETR | Yes               | 847.08                 | 704.4                 | 16.08                       | 110.3                     | 37.8                | 3755                            | ND                        | ND                        | No                                 |
| PLSL                | YPALHKPENQDIDWGALEGETR | Yes               | 847.08                 | 710.4                 | 16.08                       | 110.3                     | 43.8                | 1090                            | ND                        | ND                        | No                                 |
| PLSL                | YPALHKPENQDIDWGALEGETR | Yes               | 847.08                 | 775.4                 | 16.08                       | 110.3                     | 46.8                | ND                              | ND                        | ND                        | No                                 |
| PLUNC               | LDITAEILAVR            | Yes               | 607.36                 | 700.4                 | 21.19                       | 79.3                      | 29.2                | 6923                            | ND                        | ND                        | No                                 |
| PLUNC               | LDITAEILAVR            | Yes               | 607.36                 | 771.5                 | 21.19                       | 79.3                      | 29.2                | 11867                           | ND                        | ND                        | No                                 |
| PLUNC               | LDITAEILAVR            | Yes               | 607.36                 | 872.5                 | 21.19                       | 79.3                      | 29.2                | 20708                           | ND                        | ND                        | No                                 |
| PLUNC               | LDITAEILAVR            | Yes               | 607.36                 | 985.6                 | 21.19                       | 79.3                      | 32.2                | ND                              | ND                        | ND                        | Yes (Based on<br>Manual<br>Review) |
| PLUNC               | LQVNTPLVGASLLR         | Yes               | 740.95                 | 341.2                 | 19.57                       | 96.6                      | 35.1                | 43538                           | ND                        | ND                        | No                                 |
| PLUNC               | LQVNTPLVGASLLR         | Yes               | 740.95                 | 556.3                 | 19.57                       | 96.6                      | 32.1                | 42005                           | ND                        | ND                        | No                                 |
| PLUNC               | LQVNTPLVGASLLR         | Yes               | 740.95                 | 616.4                 | 19.57                       | 96.6                      | 41.1                | 48631                           | ND                        | ND                        | No                                 |

**Table S5.** MRM assay of individual proteins.

| Protein<br>(_HUMAN) | Peptide            | MS/MS<br>spectrum | Precursor ion<br>(m/z) | Fragment ion<br>(m/z) | Retention time<br>(minutes) | Declustering<br>potential | Collision<br>energy | Area of<br>synthetic<br>peptide | Area in control<br>sample | Area in disease<br>sample | Interference                           |
|---------------------|--------------------|-------------------|------------------------|-----------------------|-----------------------------|---------------------------|---------------------|---------------------------------|---------------------------|---------------------------|----------------------------------------|
| PLUNC               | LQVNTPLVGASLLR     | Yes               | 740.95                 | 925.6                 | 19.57                       | 96.6                      | 38.1                | 90980                           | ND                        | ND                        | No                                     |
| PLUNC               | LYVTIPLGIK         | Yes               | 558.86                 | 277.2                 | 20.23                       | 73.1                      | 24.1                | 1257022                         | 34633                     | 30268                     | Yes (Based on<br>Transition<br>Ratios) |
| PLUNC               | LYVTIPLGIK         | Yes               | 558.86                 | 527.4                 | 20.23                       | 73.1                      | 36.1                | 879721                          | 11303                     | 6515                      | No                                     |
| PLUNC               | LYVTIPLGIK         | Yes               | 558.86                 | 741.5                 | 20.23                       | 73.1                      | 27.1                | 517880                          | 7349                      | 4470                      | No                                     |
| PLUNC               | LYVTIPLGIK         | Yes               | 558.86                 | 840.6                 | 20.23                       | 73.1                      | 27.1                | 798614                          | 9812                      | 4058                      | No                                     |
| PLUNC               | VTDPQLELGLVQSPDGHR | Yes               | 692.04                 | 369.2                 | 18.45                       | 90.3                      | 41.8                | 39971                           | ND                        | ND                        | No                                     |
| PLUNC               | VTDPQLELGLVQSPDGHR | Yes               | 692.04                 | 581.3                 | 18.45                       | 90.3                      | 41.8                | 26502                           | ND                        | ND                        | No                                     |
| PLUNC               | VTDPQLELGLVQSPDGHR | Yes               | 692.04                 | 668.3                 | 18.45                       | 90.3                      | 41.8                | 20636                           | ND                        | ND                        | No                                     |
| PLUNC               | VTDPQLELGLVQSPDGHR | Yes               | 692.04                 | 796.4                 | 18.45                       | 90.3                      | 35.8                | 21192                           | ND                        | ND                        | No                                     |
| PLUNC               | VTSVIPGLNNIIDIK    | Yes               | 798.47                 | 999.6                 | 22.79                       | 104                       | 34.6                | 4901                            | ND                        | ND                        | No                                     |
| PLUNC               | VTSVIPGLNNIIDIK    | Yes               | 798.47                 | 288.2                 | 22.79                       | 104                       | 46.6                | 21350                           | ND                        | ND                        | No                                     |
| PLUNC               | VTSVIPGLNNIIDIK    | Yes               | 798.47                 | 387.2                 | 22.79                       | 104                       | 37.6                | 40384                           | ND                        | ND                        | No                                     |
| PLUNC               | VTSVIPGLNNIIDIK    | Yes               | 798.47                 | 500.3                 | 22.79                       | 104                       | 34.6                | 42409                           | ND                        | ND                        | No                                     |
| PLXB3               | ELPVPIYVTQGEAQR    | Yes               | 567.31                 | 374.2                 | 16.84                       | 74.2                      | 35.5                | 125582                          | ND                        | ND                        | No                                     |
| PLXB3               | ELPVPIYVTQGEAQR    | Yes               | 567.31                 | 688.3                 | 16.84                       | 74.2                      | 35.5                | 20131                           | ND                        | ND                        | No                                     |
| PLXB3               | ELPVPIYVTQGEAQR    | Yes               | 567.31                 | 789.4                 | 16.84                       | 74.2                      | 26.5                | 42072                           | ND                        | ND                        | No                                     |
| PLXB3               | ELPVPIYVTQGEAQR    | Yes               | 567.31                 | 888.5                 | 16.84                       | 74.2                      | 32.5                | 8028                            | ND                        | ND                        | No                                     |
| PLXB3               | GPSGAEATVEYGVTSR   | Yes               | 855.4                  | 519.3                 | 11.28                       | 111.3                     | 49.1                | 19508                           | ND                        | ND                        | No                                     |
| PLXB3               | GPSGAEATVEYGVTSR   | Yes               | 855.4                  | 682.4                 | 11.28                       | 111.3                     | 49.1                | 20559                           | ND                        | ND                        | No                                     |
| PLXB3               | GPSGAEATVEYGVTSR   | Yes               | 855.4                  | 699.3                 | 11.28                       | 111.3                     | 40.1                | 7735                            | ND                        | ND                        | No                                     |
| PLXB3               | GPSGAEATVEYGVTSR   | Yes               | 855.4                  | 811.4                 | 11.28                       | 111.3                     | 40.1                | 23528                           | ND                        | ND                        | No                                     |
| PLXB3               | GPVDAVTGK          | Yes               | 422.23                 | 305.2                 | 8.60                        | 55.5                      | 30.1                | 809606                          | ND                        | ND                        | No                                     |

**Table S5.** MRM assay of individual proteins.

| Protein<br>(_HUMAN) | Peptide                 | MS/MS<br>spectrum | Precursor ion<br>(m/z) | Fragment ion<br>(m/z) | Retention time<br>(minutes) | Declustering<br>potential | Collision<br>energy | Area of<br>synthetic<br>peptide | Area in control<br>sample | Area in disease<br>sample | Interference |
|---------------------|-------------------------|-------------------|------------------------|-----------------------|-----------------------------|---------------------------|---------------------|---------------------------------|---------------------------|---------------------------|--------------|
| PLXB3               | GPVDAVTGK               | Yes               | 422.23                 | 475.3                 | 8.60                        | 55.5                      | 24.1                | 196652                          | ND                        | ND                        | No           |
| PLXB3               | GPVDAVTGK               | Yes               | 422.23                 | 590.3                 | 8.60                        | 55.5                      | 21.1                | 781169                          | ND                        | ND                        | No           |
| PLXB3               | GPVDAVTGK               | Yes               | 422.23                 | 689.4                 | 8.60                        | 55.5                      | 21.1                | 350145                          | ND                        | ND                        | No           |
| PLXB3               | QLAGSQPFSEGLGR          | No                |                        |                       |                             |                           |                     |                                 |                           |                           |              |
| PLXB3               | SQPPGISSQHFTYQDPVLLSLSR | Yes               | 885.46                 | 559.3                 | 20.00                       | 115.2                     | 51.7                | 9042                            | ND                        | ND                        | No           |
| PLXB3               | SQPPGISSQHFTYQDPVLLSLSR | Yes               | 885.46                 | 672.4                 | 20.00                       | 115.2                     | 42.7                | 7634                            | ND                        | ND                        | No           |
| PLXB3               | SQPPGISSQHFTYQDPVLLSLSR | Yes               | 885.46                 | 785.5                 | 20.00                       | 115.2                     | 51.7                | 6935                            | ND                        | ND                        | No           |
| PLXB3               | SQPPGISSQHFTYQDPVLLSLSR | Yes               | 885.46                 | 981.6                 | 20.00                       | 115.2                     | 51.7                | 14191                           | ND                        | ND                        | No           |
| PLXC1               | FWVNILK                 | Yes               | 460.274                | 334.156               | 19.37                       | 100                       | 22.8                | ND                              | ND                        | ND                        | No           |
| PLXC1               | FWVNILK                 | Yes               | 460.274                | 487.3                 | 19.37                       | 100                       | 25.8                | ND                              | ND                        | ND                        | No           |
| PLXC1               | FWVNILK                 | Yes               | 460.274                | 586.393               | 19.37                       | 100                       | 22.8                | ND                              | ND                        | ND                        | No           |
| PLXC1               | FWVNILK                 | Yes               | 460.274                | 772.5                 | 19.37                       | 100                       | 25.8                | ND                              | ND                        | ND                        | No           |
| PLXC1               | LNTIGHYEISNGSTIK        | Yes               | 582.973                | 619.341               | 11.74                       | 100                       | 27.3                | ND                              | 78642                     | 51870                     | No           |
| PLXC1               | LNTIGHYEISNGSTIK        | Yes               | 582.973                | 706.374               | 11.74                       | 100                       | 33.3                | ND                              | ND                        | 4463                      | No           |
| PLXC1               | LNTIGHYEISNGSTIK        | Yes               | 582.973                | 817.4                 | 11.74                       | 100                       | 30.2                | ND                              | ND                        | ND                        | No           |
| PLXC1               | LNTIGHYEISNGSTIK        | Yes               | 582.973                | 819.5                 | 11.74                       | 100                       | 30.2                | ND                              | ND                        | ND                        | No           |
| PLXC1               | LNTIGHYEISNGSTIK        | Yes               | 874                    | 1111.6                | 11.74                       | 100                       | 44                  | ND                              | ND                        | ND                        | No           |
| PLXC1               | LNTIGHYEISNGSTIK        | Yes               | 874                    | 706.4                 | 11.74                       | 100                       | 44                  | ND                              | ND                        | ND                        | No           |
| PLXC1               | LNTIGHYEISNGSTIK        | Yes               | 874                    | 948.5                 | 11.74                       | 100                       | 44                  | ND                              | ND                        | ND                        | No           |
| PLXC1               | NPQFVFDIK               | Yes               | 554.3                  | 260.2                 | 19.50                       | 100                       | 29.9                | ND                              | ND                        | ND                        | No           |
| PLXC1               | NPQFVFDIK               | Yes               | 554.3                  | 497.3                 | 19.50                       | 100                       | 29.9                | ND                              | ND                        | ND                        | No           |
| PLXC1               | NPQFVFDIK               | Yes               | 554.3                  | 522.3                 | 19.50                       | 100                       | 29.9                | ND                              | ND                        | ND                        | No           |
| PLXC1               | NPQFVFDIK               | Yes               | 554.3                  | 768.4                 | 19.50                       | 100                       | 29.9                | ND                              | ND                        | ND                        | No           |

**Table S5.** MRM assay of individual proteins.

| Protein<br>(_HUMAN) | Peptide                 | MS/MS<br>spectrum | Precursor ion<br>(m/z) | Fragment ion<br>(m/z) | Retention time<br>(minutes) | Declustering<br>potential | Collision<br>energy | Area of<br>synthetic<br>peptide | Area in control<br>sample | Area in disease<br>sample | Interference |
|---------------------|-------------------------|-------------------|------------------------|-----------------------|-----------------------------|---------------------------|---------------------|---------------------------------|---------------------------|---------------------------|--------------|
| POSTN               | GFEPGVTNILK             | Yes               | 587.83                 | 334.1                 | 16.56                       | 76.8                      | 25.4                | 324313                          | ND                        | ND                        | No           |
| POSTN               | GFEPGVTNILK             | Yes               | 587.83                 | 744.5                 | 16.56                       | 76.8                      | 37.4                | 83588                           | ND                        | ND                        | No           |
| POSTN               | GFEPGVTNILK             | Yes               | 587.83                 | 841.5                 | 16.56                       | 76.8                      | 28.4                | 403607                          | ND                        | ND                        | No           |
| POSTN               | GFEPGVTNILK             | Yes               | 587.83                 | 970.6                 | 16.56                       | 76.8                      | 28.4                | 15107                           | ND                        | ND                        | No           |
| POSTN               | IIDGVPVEITEK            | Yes               | 656.87                 | 399.2                 | 15.07                       | 85.7                      | 31.4                | 99834                           | ND                        | ND                        | No           |
| POSTN               | IIDGVPVEITEK            | Yes               | 656.87                 | 498.3                 | 15.07                       | 85.7                      | 28.4                | 231637                          | ND                        | ND                        | No           |
| POSTN               | IIDGVPVEITEK            | Yes               | 656.87                 | 815.5                 | 15.07                       | 85.7                      | 31.4                | 505541                          | ND                        | ND                        | No           |
| POSTN               | IIDGVPVEITEK            | Yes               | 656.87                 | 971.5                 | 15.07                       | 85.7                      | 40.4                | 15408                           | ND                        | ND                        | No           |
| POSTN               | IIHGNQIATNGVVHVIDR      | Yes               | 652.7                  | 364.2                 | 13.14                       | 85.2                      | 33.8                | 7454                            | ND                        | ND                        | No           |
| POSTN               | IIHGNQIATNGVVHVIDR      | Yes               | 652.7                  | 502.3                 | 13.14                       | 85.2                      | 36.8                | 6706                            | ND                        | ND                        | No           |
| POSTN               | IIHGNQIATNGVVHVIDR      | Yes               | 652.7                  | 738.4                 | 13.14                       | 85.2                      | 33.8                | 5578                            | 2007                      | ND                        | No           |
| POSTN               | IIHGNQIATNGVVHVIDR      | Yes               | 652.7                  | 847.5                 | 13.14                       | 85.2                      | 33.8                | 1948                            | ND                        | ND                        | No           |
| POSTN               | LLYPADTPVGNDQLEILNK     | Yes               | 742.74                 | 261.2                 | 23.13                       | 96.8                      | 41.4                | 56393                           | ND                        | ND                        | No           |
| POSTN               | LLYPADTPVGNDQLEILNK     | Yes               | 742.74                 | 616.4                 | 23.13                       | 96.8                      | 32.4                | 33407                           | ND                        | ND                        | No           |
| POSTN               | LLYPADTPVGNDQLEILNK     | Yes               | 742.74                 | 774.4                 | 23.13                       | 96.8                      | 32.4                | 23106                           | ND                        | ND                        | No           |
| POSTN               | LLYPADTPVGNDQLEILNK     | Yes               | 742.74                 | 842.5                 | 23.13                       | 96.8                      | 35.4                | 25420                           | ND                        | ND                        | No           |
| POSTN               | VLTQIGTSIQDFIEAEDDLSSFR | No                |                        |                       |                             |                           |                     |                                 |                           |                           |              |
| PPAL                | DPYQEEEWPGFGQLTK        | Yes               | 1026.47                | 546.3                 | 18.53                       | 133.4                     | 53.7                | 20226                           | ND                        | ND                        | No           |
| PPAL                | DPYQEEEWPGFGQLTK        | Yes               | 1026.47                | 633.3                 | 18.53                       | 133.4                     | 47.7                | 16600                           | ND                        | ND                        | No           |
| PPAL                | DPYQEEEWPGFGQLTK        | Yes               | 1026.47                | 891.3                 | 18.53                       | 133.4                     | 47.7                | 22850                           | ND                        | ND                        | No           |
| PPAL                | DPYQEEEWPGFGQLTK        | Yes               | 1026.47                | 975.5                 | 18.53                       | 133.4                     | 47.7                | 54225                           | ND                        | ND                        | No           |
| PPAL                | FLFGIYQQA EK            | Yes               | 672.35                 | 261.2                 | 19.73                       | 87.7                      | 29.1                | 907541                          | ND                        | ND                        | No           |
| PPAL                | FLFGIYQQA EK            | Yes               | 672.35                 | 603.3                 | 19.73                       | 87.7                      | 29.1                | 114404                          | ND                        | ND                        | No           |

**Table S5.** MRM assay of individual proteins.

| Protein<br>(_HUMAN) | Peptide        | MS/MS<br>spectrum | Precursor ion<br>(m/z) | Fragment ion<br>(m/z) | Retention time<br>(minutes) | Declustering<br>potential | Collision<br>energy | Area of<br>synthetic<br>peptide | Area in control<br>sample | Area in disease<br>sample | Interference |
|---------------------|----------------|-------------------|------------------------|-----------------------|-----------------------------|---------------------------|---------------------|---------------------------------|---------------------------|---------------------------|--------------|
| PPAL                | FLFGIYQQA EK   | Yes               | 672.35                 | 766.4                 | 19.73                       | 87.7                      | 32.1                | 448857                          | ND                        | ND                        | No           |
| PPAL                | FLFGIYQQA EK   | Yes               | 672.35                 | 936.5                 | 19.73                       | 87.7                      | 32.1                | 267851                          | ND                        | ND                        | No           |
| PPAL                | FVTLLYR        | Yes               | 456.27                 | 338.2                 | 16.82                       | 59.9                      | 19.6                | 38696                           | ND                        | ND                        | No           |
| PPAL                | FVTLLYR        | Yes               | 456.27                 | 564.4                 | 16.82                       | 59.9                      | 22.6                | 48800                           | ND                        | ND                        | No           |
| PPAL                | FVTLLYR        | Yes               | 456.27                 | 665.4                 | 16.82                       | 59.9                      | 22.6                | 290264                          | ND                        | ND                        | No           |
| PPAL                | FVTLLYR        | Yes               | 456.27                 | 764.5                 | 16.82                       | 59.9                      | 31.6                | 22123                           | ND                        | ND                        | No           |
| PPAL                | HVADGEDHA      | Yes               | 475.7                  | 528.2                 | 5.36                        | 62.4                      | 29.4                | 37415                           | ND                        | ND                        | No           |
| PPAL                | HVADGEDHA      | Yes               | 475.7                  | 714.3                 | 5.36                        | 62.4                      | 23.4                | 89949                           | ND                        | ND                        | No           |
| PPAL                | HVADGEDHA      | Yes               | 475.7                  | 724.3                 | 5.36                        | 62.4                      | 26.4                | 41875                           | ND                        | ND                        | No           |
| PPAL                | HVADGEDHA      | Yes               | 475.7                  | 813.3                 | 5.36                        | 62.4                      | 23.4                | 29580                           | ND                        | ND                        | No           |
| PPAL                | LTEPVV PK      | Yes               | 441.77                 | 343.2                 | 10.22                       | 58                        | 30.9                | 132269                          | ND                        | ND                        | No           |
| PPAL                | LTEPVV PK      | Yes               | 441.77                 | 539.4                 | 10.22                       | 58                        | 21.9                | 300416                          | ND                        | ND                        | No           |
| PPAL                | LTEPVV PK      | Yes               | 441.77                 | 668.4                 | 10.22                       | 58                        | 21.9                | 237137                          | ND                        | ND                        | No           |
| PPAL                | LTEPVV PK      | Yes               | 441.77                 | 769.4                 | 10.22                       | 58                        | 21.9                | 138062                          | ND                        | ND                        | No           |
| PPBT                | ANEGTVGVSAATER | Yes               | 681.34                 | 634.3                 | 8.17                        | 88.9                      | 32.5                | 31298                           | ND                        | ND                        | No           |
| PPBT                | ANEGTVGVSAATER | Yes               | 681.34                 | 733.4                 | 8.17                        | 88.9                      | 32.5                | 8835                            | ND                        | ND                        | No           |
| PPBT                | ANEGTVGVSAATER | Yes               | 681.34                 | 790.4                 | 8.17                        | 88.9                      | 32.5                | 61787                           | ND                        | ND                        | No           |
| PPBT                | ANEGTVGVSAATER | Yes               | 681.34                 | 889.5                 | 8.17                        | 88.9                      | 32.5                | 15618                           | ND                        | ND                        | No           |
| PPBT                | DQAQETLK       | Yes               | 466.74                 | 361.2                 | 6.29                        | 61.2                      | 32                  | 123889                          | ND                        | ND                        | No           |
| PPBT                | DQAQETLK       | Yes               | 466.74                 | 490.3                 | 6.29                        | 61.2                      | 23                  | 75097                           | ND                        | ND                        | No           |
| PPBT                | DQAQETLK       | Yes               | 466.74                 | 618.3                 | 6.29                        | 61.2                      | 23                  | 114894                          | ND                        | ND                        | No           |
| PPBT                | DQAQETLK       | Yes               | 466.74                 | 689.4                 | 6.29                        | 61.2                      | 20                  | 356340                          | ND                        | ND                        | No           |
| PPBT                | HETHGGEDVAVFSK | Yes               | 504.91                 | 381.2                 | 9.31                        | 66.1                      | 32.3                | 64382                           | ND                        | ND                        | No           |



**Table S5.** MRM assay of individual proteins.

| <b>Protein<br/>(_HUMAN)</b> | <b>Peptide</b> | <b>MS/MS<br/>spectrum</b> | <b>Precursor ion<br/>(m/z)</b> | <b>Fragment ion<br/>(m/z)</b> | <b>Retention time<br/>(minutes)</b> | <b>Decustering<br/>potential</b> | <b>Collision<br/>energy</b> | <b>Area of<br/>synthetic<br/>peptide</b> | <b>Area in control<br/>sample</b> | <b>Area in disease<br/>sample</b> | <b>Interference</b> |
|-----------------------------|----------------|---------------------------|--------------------------------|-------------------------------|-------------------------------------|----------------------------------|-----------------------------|------------------------------------------|-----------------------------------|-----------------------------------|---------------------|
| PPBT                        | HETHGGEDVAVFSK | Yes                       | 504.91                         | 480.3                         | 9.31                                | 66.1                             | 29.3                        | 17424                                    | ND                                | ND                                | No                  |
| PPBT                        | HETHGGEDVAVFSK | Yes                       | 504.91                         | 551.3                         | 9.31                                | 66.1                             | 26.3                        | 34602                                    | ND                                | ND                                | No                  |
| PPBT                        | HETHGGEDVAVFSK | Yes                       | 504.91                         | 650.4                         | 9.31                                | 66.1                             | 26.3                        | 11166                                    | ND                                | ND                                | No                  |
| PPBT                        | LDGLDLVDTWK    | Yes                       | 637.84                         | 434.2                         | 20.73                               | 83.3                             | 39.6                        | 69928                                    | ND                                | ND                                | No                  |
| PPBT                        | LDGLDLVDTWK    | Yes                       | 637.84                         | 549.3                         | 20.73                               | 83.3                             | 30.6                        | 82624                                    | ND                                | ND                                | No                  |
| PPBT                        | LDGLDLVDTWK    | Yes                       | 637.84                         | 761.4                         | 20.73                               | 83.3                             | 30.6                        | 62217                                    | ND                                | ND                                | No                  |
| PPBT                        | LDGLDLVDTWK    | Yes                       | 637.84                         | 876.4                         | 20.73                               | 83.3                             | 30.6                        | 151694                                   | ND                                | ND                                | No                  |
| PPBT                        | YFLHQSHEER     | Yes                       | 449.21                         | 311.1                         | 7.82                                | 58.9                             | 23.5                        | 12003                                    | ND                                | ND                                | No                  |
| PPBT                        | YFLHQSHEER     | Yes                       | 449.21                         | 570.3                         | 7.82                                | 58.9                             | 29.5                        | 3782                                     | ND                                | ND                                | No                  |
| PPBT                        | YFLHQSHEER     | Yes                       | 449.21                         | 657.3                         | 7.82                                | 58.9                             | 29.5                        | 7495                                     | ND                                | ND                                | No                  |
| PPBT                        | YFLHQSHEER     | Yes                       | 449.21                         | 785.4                         | 7.82                                | 58.9                             | 29.5                        | 11764                                    | ND                                | ND                                | No                  |
| PPIB                        | FPDENFK        | Yes                       | 448.71                         | 537.3                         | 11.04                               | 58.9                             | 28.2                        | ND                                       | ND                                | ND                                | No                  |
| PPIB                        | FPDENFK        | Yes                       | 448.71                         | 603.2                         | 11.04                               | 58.9                             | 25.2                        | 16363                                    | ND                                | ND                                | No                  |
| PPIB                        | FPDENFK        | Yes                       | 448.71                         | 652.3                         | 11.04                               | 58.9                             | 25.2                        | ND                                       | ND                                | ND                                | No                  |
| PPIB                        | FPDENFK        | Yes                       | 448.71                         | 749.3                         | 11.04                               | 58.9                             | 22.2                        | ND                                       | ND                                | ND                                | No                  |
| PPIB                        | IEVEKPFAIAK    | Yes                       | 415.58                         | 331.2                         | 13.47                               | 54.6                             | 24.7                        | 24279                                    | ND                                | ND                                | No                  |
| PPIB                        | IEVEKPFAIAK    | Yes                       | 415.58                         | 646.4                         | 13.47                               | 54.6                             | 21.7                        | 66870                                    | ND                                | ND                                | No                  |
| PPIB                        | IEVEKPFAIAK    | Yes                       | 415.58                         | 774.5                         | 13.47                               | 54.6                             | 18.7                        | 13166                                    | ND                                | ND                                | No                  |
| PPIB                        | IEVEKPFAIAK    | Yes                       | 415.58                         | 903.5                         | 13.47                               | 54.6                             | 27.7                        | ND                                       | ND                                | ND                                | No                  |
| PPIB                        | TVDNFVALATGEK  | Yes                       | 682.86                         | 430.2                         | 17.66                               | 89.1                             | 29.5                        | 19753                                    | ND                                | ND                                | No                  |
| PPIB                        | TVDNFVALATGEK  | Yes                       | 682.86                         | 577.3                         | 17.66                               | 89.1                             | 32.5                        | 41987                                    | ND                                | ND                                | No                  |
| PPIB                        | TVDNFVALATGEK  | Yes                       | 682.86                         | 788.5                         | 17.66                               | 89.1                             | 32.5                        | 85171                                    | ND                                | ND                                | No                  |
| PPIB                        | TVDNFVALATGEK  | Yes                       | 682.86                         | 935.5                         | 17.66                               | 89.1                             | 32.5                        | 16719                                    | ND                                | ND                                | No                  |

**Table S5.** MRM assay of individual proteins.

| Protein<br>(_HUMAN) | Peptide     | MS/MS<br>spectrum | Precursor ion<br>(m/z) | Fragment ion<br>(m/z) | Retention time<br>(minutes) | Declustering<br>potential | Collision<br>energy | Area of<br>synthetic<br>peptide | Area in control<br>sample | Area in disease<br>sample | Interference                           |
|---------------------|-------------|-------------------|------------------------|-----------------------|-----------------------------|---------------------------|---------------------|---------------------------------|---------------------------|---------------------------|----------------------------------------|
| PPIB                | VIFGLFGK    | Yes               | 440.77                 | 351.2                 | 21.03                       | 57.9                      | 27.9                | 191828                          | 3553                      | 5492                      | No                                     |
| PPIB                | VIFGLFGK    | Yes               | 440.77                 | 521.3                 | 21.03                       | 57.9                      | 21.9                | 82929                           | ND                        | ND                        | No                                     |
| PPIB                | VIFGLFGK    | Yes               | 440.77                 | 668.4                 | 21.03                       | 57.9                      | 21.9                | 493439                          | 8187                      | 3865                      | No                                     |
| PPIB                | VIFGLFGK    | Yes               | 440.77                 | 781.5                 | 21.03                       | 57.9                      | 21.9                | 48307                           | ND                        | ND                        | No                                     |
| PPIB                | VYFDLR      | Yes               | 406.72                 | 263.1                 | 15.07                       | 53.5                      | 20.4                | 114362                          | 17538                     | 15604                     | No                                     |
| PPIB                | VYFDLR      | Yes               | 406.72                 | 288.2                 | 15.07                       | 53.5                      | 29.4                | 375616                          | 106116                    | 99482                     | Yes (Based on<br>Transition<br>Ratios) |
| PPIB                | VYFDLR      | Yes               | 406.72                 | 550.3                 | 15.07                       | 53.5                      | 20.4                | 182617                          | 12041                     | 3981                      | Yes (Based on<br>Transition<br>Ratios) |
| PPIB                | VYFDLR      | Yes               | 406.72                 | 713.4                 | 15.07                       | 53.5                      | 20.4                | 33985                           | 4712                      | 2849                      | No                                     |
| PRDX1               | ADEGISFR    | Yes               | 447.72                 | 409.2                 | 12.95                       | 58.8                      | 22.2                | 3701027                         | ND                        | ND                        | No                                     |
| PRDX1               | ADEGISFR    | Yes               | 447.72                 | 522.3                 | 12.95                       | 58.8                      | 31.2                | 652531                          | ND                        | ND                        | No                                     |
| PRDX1               | ADEGISFR    | Yes               | 447.72                 | 579.3                 | 12.95                       | 58.8                      | 22.2                | 3080780                         | ND                        | ND                        | No                                     |
| PRDX1               | ADEGISFR    | Yes               | 447.72                 | 708.4                 | 12.95                       | 58.8                      | 22.2                | 2003432                         | ND                        | ND                        | No                                     |
| PRDX1               | ATAVMPDGQFK | Yes               | 582.79                 | 691.3                 | 13.05                       | 76.2                      | 25.1                | 2294568                         | ND                        | ND                        | No                                     |
| PRDX1               | ATAVMPDGQFK | Yes               | 582.79                 | 822.4                 | 13.05                       | 76.2                      | 28.1                | 1466078                         | ND                        | ND                        | No                                     |
| PRDX1               | ATAVMPDGQFK | Yes               | 582.79                 | 921.5                 | 13.05                       | 76.2                      | 28.1                | 338255                          | ND                        | ND                        | No                                     |
| PRDX1               | ATAVMPDGQFK | Yes               | 582.79                 | 992.5                 | 13.05                       | 76.2                      | 28.1                | 243882                          | ND                        | ND                        | No                                     |
| PRDX1               | DISLSDYK    | Yes               | 470.74                 | 310.2                 | 13.83                       | 61.7                      | 32.2                | 1002950                         | ND                        | ND                        | No                                     |
| PRDX1               | DISLSDYK    | Yes               | 470.74                 | 512.2                 | 13.83                       | 61.7                      | 32.2                | 411632                          | ND                        | ND                        | No                                     |
| PRDX1               | DISLSDYK    | Yes               | 470.74                 | 625.3                 | 13.83                       | 61.7                      | 20.2                | 292890                          | ND                        | ND                        | No                                     |
| PRDX1               | DISLSDYK    | Yes               | 470.74                 | 712.4                 | 13.83                       | 61.7                      | 23.2                | 3091300                         | ND                        | ND                        | No                                     |

**Table S5.** MRM assay of individual proteins.

| Protein<br>(_HUMAN) | Peptide          | MS/MS<br>spectrum | Precursor ion<br>(m/z) | Fragment ion<br>(m/z) | Retention time<br>(minutes) | Declustering<br>potential | Collision<br>energy | Area of<br>synthetic<br>peptide | Area in control<br>sample | Area in disease<br>sample | Interference |
|---------------------|------------------|-------------------|------------------------|-----------------------|-----------------------------|---------------------------|---------------------|---------------------------------|---------------------------|---------------------------|--------------|
| PRDX1               | GLFIIDDK         | Yes               | 460.76                 | 377.2                 | 19.23                       | 60.4                      | 31.8                | 1500328                         | ND                        | ND                        | No           |
| PRDX1               | GLFIIDDK         | Yes               | 460.76                 | 490.3                 | 19.23                       | 60.4                      | 22.8                | 4342656                         | ND                        | ND                        | No           |
| PRDX1               | GLFIIDDK         | Yes               | 460.76                 | 603.3                 | 19.23                       | 60.4                      | 22.8                | 3694805                         | ND                        | ND                        | No           |
| PRDX1               | GLFIIDDK         | Yes               | 460.76                 | 750.4                 | 19.23                       | 60.4                      | 22.8                | 5186862                         | ND                        | ND                        | No           |
| PRDX1               | IGHPAPNFK        | Yes               | 327.52                 | 294.2                 | 9.63                        | 43.3                      | 23.3                | 132510                          | 16466                     | 13802                     | No           |
| PRDX1               | IGHPAPNFK        | Yes               | 327.52                 | 505.3                 | 9.63                        | 43.3                      | 23.3                | 464807                          | 28679                     | 21394                     | No           |
| PRDX1               | IGHPAPNFK        | Yes               | 327.52                 | 576.3                 | 9.63                        | 43.3                      | 23.3                | 70900                           | 4280                      | 3124                      | No           |
| PRDX1               | IGHPAPNFK        | Yes               | 327.52                 | 673.4                 | 9.63                        | 43.3                      | 14.3                | 248474                          | 12334                     | 11693                     | No           |
| PRDX1               | LVQAFQFTDK       | Yes               | 598.82                 | 341.2                 | 17.24                       | 78.2                      | 28.8                | 2501033                         | ND                        | ND                        | No           |
| PRDX1               | LVQAFQFTDK       | Yes               | 598.82                 | 785.4                 | 17.24                       | 78.2                      | 28.8                | 1624977                         | ND                        | ND                        | No           |
| PRDX1               | LVQAFQFTDK       | Yes               | 598.82                 | 856.4                 | 17.24                       | 78.2                      | 28.8                | 2372000                         | ND                        | ND                        | No           |
| PRDX1               | LVQAFQFTDK       | Yes               | 598.82                 | 984.5                 | 17.24                       | 78.2                      | 28.8                | 2567310                         | ND                        | ND                        | No           |
| PRDX1               | QGGLGPMNIPLVSDPK | Yes               | 811.93                 | 356.2                 | 20.30                       | 105.7                     | 35.2                | 61858                           | ND                        | ND                        | No           |
| PRDX1               | QGGLGPMNIPLVSDPK | Yes               | 811.93                 | 446.2                 | 20.30                       | 105.7                     | 38.2                | 83998                           | ND                        | ND                        | No           |
| PRDX1               | QGGLGPMNIPLVSDPK | Yes               | 811.93                 | 545.3                 | 20.30                       | 105.7                     | 44.2                | 29740                           | ND                        | ND                        | No           |
| PRDX1               | QGGLGPMNIPLVSDPK | Yes               | 811.93                 | 658.4                 | 20.30                       | 105.7                     | 38.2                | 7730                            | ND                        | ND                        | No           |
| PRDX1               | QITVNDLPVGR      | Yes               | 606.34                 | 428.3                 | 15.49                       | 79.2                      | 29.2                | 127667                          | 508208                    | 448173                    | No           |
| PRDX1               | QITVNDLPVGR      | Yes               | 606.34                 | 770.4                 | 15.49                       | 79.2                      | 35.2                | 78489                           | 296072                    | 261143                    | No           |
| PRDX1               | QITVNDLPVGR      | Yes               | 606.34                 | 869.5                 | 15.49                       | 79.2                      | 32.2                | 34766                           | 112074                    | 120150                    | No           |
| PRDX1               | QITVNDLPVGR      | Yes               | 606.34                 | 970.5                 | 15.49                       | 79.2                      | 29.2                | 48375                           | 237220                    | 193548                    | No           |
| PRDX1               | SVDETLR          | Yes               | 410.21                 | 288.2                 | 8.82                        | 53.9                      | 29.5                | 195411                          | ND                        | ND                        | No           |
| PRDX1               | SVDETLR          | Yes               | 410.21                 | 389.3                 | 8.82                        | 53.9                      | 29.5                | 802324                          | 12313                     | 8666                      | No           |
| PRDX1               | SVDETLR          | Yes               | 410.21                 | 518.3                 | 8.82                        | 53.9                      | 29.5                | 1103612                         | 10364                     | 10942                     | No           |

**Table S5.** MRM assay of individual proteins.

| Protein<br>(_HUMAN) | Peptide             | MS/MS<br>spectrum | Precursor ion<br>(m/z) | Fragment ion<br>(m/z) | Retention time<br>(minutes) | Declustering<br>potential | Collision<br>energy | Area of<br>synthetic<br>peptide | Area in control<br>sample | Area in disease<br>sample | Interference |
|---------------------|---------------------|-------------------|------------------------|-----------------------|-----------------------------|---------------------------|---------------------|---------------------------------|---------------------------|---------------------------|--------------|
| PRDX1               | SVDETLR             | Yes               | 410.21                 | 633.3                 | 8.82                        | 53.9                      | 20.5                | 7404432                         | 68155                     | 77770                     | No           |
| PRDX1               | TIAQDYGVLK          | Yes               | 554.31                 | 579.4                 | 14.78                       | 72.5                      | 35.9                | 798348                          | 4550                      | 7874                      | No           |
| PRDX1               | TIAQDYGVLK          | Yes               | 554.31                 | 694.4                 | 14.78                       | 72.5                      | 35.9                | 400510                          | ND                        | ND                        | No           |
| PRDX1               | TIAQDYGVLK          | Yes               | 554.31                 | 822.4                 | 14.78                       | 72.5                      | 26.9                | 567772                          | 4908                      | 3884                      | No           |
| PRDX1               | TIAQDYGVLK          | Yes               | 554.31                 | 893.5                 | 14.78                       | 72.5                      | 26.9                | 3574901                         | 27475                     | 20315                     | No           |
| PRDX4               | DYGVYLEDSGHTLR      | Yes               | 812.88                 | 336.1                 | 14.10                       | 105.9                     | 44.3                | 70861                           | ND                        | ND                        | No           |
| PRDX4               | DYGVYLEDSGHTLR      | Yes               | 812.88                 | 435.2                 | 14.10                       | 105.9                     | 38.3                | 21839                           | ND                        | ND                        | No           |
| PRDX4               | DYGVYLEDSGHTLR      | Yes               | 812.88                 | 785.4                 | 14.10                       | 105.9                     | 47.3                | 12808                           | ND                        | ND                        | No           |
| PRDX4               | DYGVYLEDSGHTLR      | Yes               | 812.88                 | 914.4                 | 14.10                       | 105.9                     | 38.3                | 11577                           | ND                        | ND                        | No           |
| PRDX4               | IPLLSDLTHQISK       | Yes               | 488.95                 | 612.3                 | 19.91                       | 64.1                      | 25.5                | 46897                           | ND                        | ND                        | No           |
| PRDX4               | IPLLSDLTHQISK       | Yes               | 488.95                 | 713.4                 | 19.91                       | 64.1                      | 31.5                | 46450                           | ND                        | ND                        | No           |
| PRDX4               | IPLLSDLTHQISK       | Yes               | 488.95                 | 826.5                 | 19.91                       | 64.1                      | 28.5                | 25816                           | ND                        | ND                        | No           |
| PRDX4               | IPLLSDLTHQISK       | Yes               | 488.95                 | 941.5                 | 19.91                       | 64.1                      | 31.5                | 5655                            | ND                        | ND                        | No           |
| PRDX4               | ISKPAPYWEGTAVIDGEFK | Yes               | 703.36                 | 595.3                 | 18.43                       | 91.7                      | 42.4                | 22471                           | ND                        | ND                        | No           |
| PRDX4               | ISKPAPYWEGTAVIDGEFK | Yes               | 703.36                 | 757.4                 | 18.43                       | 91.7                      | 30.4                | 11421                           | ND                        | ND                        | No           |
| PRDX4               | ISKPAPYWEGTAVIDGEFK | Yes               | 703.36                 | 807.4                 | 18.43                       | 91.7                      | 30.4                | 31258                           | ND                        | ND                        | No           |
| PRDX4               | ISKPAPYWEGTAVIDGEFK | Yes               | 703.36                 | 878.5                 | 18.43                       | 91.7                      | 33.4                | 14455                           | ND                        | ND                        | No           |
| PRDX4               | QITLNDLPVGR         | Yes               | 613.35                 | 428.3                 | 16.08                       | 80.1                      | 29.5                | 133612                          | ND                        | ND                        | No           |
| PRDX4               | QITLNDLPVGR         | Yes               | 613.35                 | 541.3                 | 16.08                       | 80.1                      | 38.5                | 100623                          | ND                        | ND                        | No           |
| PRDX4               | QITLNDLPVGR         | Yes               | 613.35                 | 770.4                 | 16.08                       | 80.1                      | 38.5                | 55159                           | ND                        | ND                        | No           |
| PRDX4               | QITLNDLPVGR         | Yes               | 613.35                 | 984.5                 | 16.08                       | 80.1                      | 29.5                | 39840                           | ND                        | ND                        | No           |
| PRDX4               | VSVADHSLHLSK        | Yes               | 431.57                 | 484.3                 | 9.86                        | 56.7                      | 25.6                | 14129                           | ND                        | ND                        | No           |
| PRDX4               | VSVADHSLHLSK        | Yes               | 431.57                 | 597.4                 | 9.86                        | 56.7                      | 19.6                | 155578                          | ND                        | ND                        | No           |

**Table S5.** MRM assay of individual proteins.

| Protein<br>(_HUMAN) | Peptide          | MS/MS<br>spectrum | Precursor ion<br>(m/z) | Fragment ion<br>(m/z) | Retention time<br>(minutes) | Declustering<br>potential | Collision<br>energy | Area of<br>synthetic<br>peptide | Area in control<br>sample | Area in disease<br>sample | Interference |
|---------------------|------------------|-------------------|------------------------|-----------------------|-----------------------------|---------------------------|---------------------|---------------------------------|---------------------------|---------------------------|--------------|
| PRDX4               | VSVADHSLHLSK     | Yes               | 431.57                 | 684.4                 | 9.86                        | 56.7                      | 28.6                | 14908                           | ND                        | ND                        | No           |
| PRDX4               | VSVADHSLHLSK     | Yes               | 431.57                 | 821.5                 | 9.86                        | 56.7                      | 28.6                | 6677                            | ND                        | ND                        | No           |
| PROF1               | DSPSVWAAVPGK     | Yes               | 607.3                  | 301.2                 | 16.90                       | 100                       | 32.2                | ND                              | ND                        | ND                        | No           |
| PROF1               | DSPSVWAAVPGK     | Yes               | 607.3                  | 400.3                 | 16.90                       | 100                       | 32.2                | ND                              | ND                        | ND                        | No           |
| PROF1               | DSPSVWAAVPGK     | Yes               | 607.3                  | 542.3                 | 16.90                       | 100                       | 32.2                | ND                              | ND                        | ND                        | No           |
| PROF1               | DSPSVWAAVPGK     | Yes               | 607.3                  | 728.4                 | 16.90                       | 100                       | 32.2                | ND                              | ND                        | ND                        | No           |
| PROF1               | SSFYVNGLTLGGQK   | Yes               | 735.9                  | 389.2                 | 18.80                       | 100                       | 37.9                | ND                              | ND                        | ND                        | No           |
| PROF1               | SSFYVNGLTLGGQK   | Yes               | 735.9                  | 773.5                 | 18.80                       | 100                       | 37.9                | ND                              | ND                        | ND                        | No           |
| PROF1               | SSFYVNGLTLGGQK   | Yes               | 735.9                  | 887.5                 | 18.80                       | 100                       | 37.9                | ND                              | ND                        | ND                        | No           |
| PROF1               | SSFYVNGLTLGGQK   | Yes               | 735.9                  | 986.6                 | 18.80                       | 100                       | 37.9                | ND                              | ND                        | ND                        | No           |
| PROF1               | STGGAPTFNVTVTK   | Yes               | 690.361                | 1006.56               | 11.98                       | 100                       | 32.9                | ND                              | 9893                      | 22358                     | No           |
| PROF1               | STGGAPTFNVTVTK   | Yes               | 690.361                | 374.2                 | 11.98                       | 100                       | 35.9                | ND                              | 15264                     | 14282                     | No           |
| PROF1               | STGGAPTFNVTVTK   | Yes               | 690.361                | 448.3                 | 11.98                       | 100                       | 35.9                | ND                              | 6462                      | ND                        | No           |
| PROF1               | STGGAPTFNVTVTK   | Yes               | 690.361                | 503.782               | 11.98                       | 100                       | 35.9                | ND                              | 24463                     | 22889                     | No           |
| PROF1               | TFVNITPAEVGVLVGK | Yes               | 822.471                | 1069.63               | 20.28                       | 100                       | 35.7                | ND                              | ND                        | ND                        | No           |
| PROF1               | TFVNITPAEVGVLVGK | Yes               | 822.471                | 416.3                 | 20.28                       | 100                       | 41.7                | ND                              | ND                        | ND                        | No           |
| PROF1               | TFVNITPAEVGVLVGK | Yes               | 822.471                | 575.3                 | 20.28                       | 100                       | 41.7                | ND                              | ND                        | ND                        | No           |
| PROF1               | TFVNITPAEVGVLVGK | Yes               | 822.471                | 968.578               | 20.28                       | 100                       | 35.7                | ND                              | ND                        | ND                        | No           |
| PRP31               | IEEYISK          | No                |                        |                       |                             |                           |                     |                                 |                           |                           |              |
| PRP31               | IYEYVESR         | Yes               | 529.76                 | 490.3                 | 9.93                        | 69.3                      | 25.8                | 20716                           | ND                        | ND                        | No           |
| PRP31               | IYEYVESR         | Yes               | 529.76                 | 653.3                 | 9.93                        | 69.3                      | 25.8                | 33632                           | ND                        | ND                        | No           |
| PRP31               | IYEYVESR         | Yes               | 529.76                 | 782.4                 | 9.93                        | 69.3                      | 25.8                | 86637                           | ND                        | ND                        | No           |
| PRP31               | IYEYVESR         | Yes               | 529.76                 | 945.4                 | 9.93                        | 69.3                      | 28.8                | 18826                           | ND                        | ND                        | No           |

**Table S5.** MRM assay of individual proteins.

| Protein<br>(_HUMAN) | Peptide               | MS/MS<br>spectrum | Precursor ion<br>(m/z) | Fragment ion<br>(m/z) | Retention time<br>(minutes) | Declustering<br>potential | Collision<br>energy | Area of<br>synthetic<br>peptide | Area in control<br>sample | Area in disease<br>sample | Interference |
|---------------------|-----------------------|-------------------|------------------------|-----------------------|-----------------------------|---------------------------|---------------------|---------------------------------|---------------------------|---------------------------|--------------|
| PRP31               | QTQVNEATK             | Yes               | 509.76                 | 562.3                 | 5.53                        | 66.8                      | 27.9                | 73958                           | ND                        | ND                        | No           |
| PRP31               | QTQVNEATK             | Yes               | 509.76                 | 661.4                 | 5.53                        | 66.8                      | 27.9                | 37533                           | ND                        | ND                        | No           |
| PRP31               | QTQVNEATK             | Yes               | 509.76                 | 789.4                 | 5.53                        | 66.8                      | 24.9                | 26323                           | ND                        | ND                        | No           |
| PRP31               | QTQVNEATK             | Yes               | 509.76                 | 890.5                 | 5.53                        | 66.8                      | 24.9                | 5684                            | ND                        | ND                        | No           |
| PRP31               | VDSFHESGEGK           | Yes               | 618.28                 | 521.3                 | 6.65                        | 80.8                      | 38.7                | 21457                           | ND                        | ND                        | No           |
| PRP31               | VDSFHESGEGK           | Yes               | 618.28                 | 650.3                 | 6.65                        | 80.8                      | 38.7                | 21053                           | ND                        | ND                        | No           |
| PRP31               | VDSFHESGEGK           | Yes               | 618.28                 | 715.3                 | 6.65                        | 80.8                      | 38.7                | 7600                            | ND                        | ND                        | No           |
| PRP31               | VDSFHESGEGK           | Yes               | 618.28                 | 787.4                 | 6.65                        | 80.8                      | 35.7                | 29351                           | ND                        | ND                        | No           |
| PRP31               | VIVDANNLTVEIENELNIIHK | No                |                        |                       |                             |                           |                     |                                 |                           |                           |              |
| PRS6A               | AMEVDERPTEQYSDIGGLDK  | Yes               | 1127                   | 602.4                 | 16.10                       | 100                       | 55.1                | ND                              | ND                        | ND                        | No           |
| PRS6A               | AMEVDERPTEQYSDIGGLDK  | Yes               | 1127                   | 789.9                 | 16.10                       | 100                       | 55.1                | ND                              | ND                        | ND                        | No           |
| PRS6A               | AMEVDERPTEQYSDIGGLDK  | Yes               | 1127                   | 831.4                 | 16.10                       | 100                       | 55.1                | ND                              | ND                        | ND                        | No           |
| PRS6A               | AMEVDERPTEQYSDIGGLDK  | Yes               | 1127                   | 854.4                 | 16.10                       | 100                       | 55.1                | ND                              | ND                        | ND                        | No           |
| PRS6A               | AMEVDERPTEQYSDIGGLDK  | Yes               | 751.7                  | 1026                  | 16.10                       | 100                       | 38.8                | ND                              | 45571                     | 29298                     | No           |
| PRS6A               | AMEVDERPTEQYSDIGGLDK  | Yes               | 751.7                  | 804.4                 | 16.10                       | 100                       | 38.8                | ND                              | ND                        | ND                        | No           |
| PRS6A               | AMEVDERPTEQYSDIGGLDK  | Yes               | 751.7                  | 854.4                 | 16.10                       | 100                       | 38.8                | ND                              | ND                        | 4788                      | No           |
| PRS6A               | AMEVDERPTEQYSDIGGLDK  | Yes               | 751.7                  | 961.5                 | 16.10                       | 100                       | 38.8                | ND                              | 75283                     | 35017                     | No           |
| PRS6A               | GVLMYGPPGTGK          | Yes               | 588.8                  | 556.3                 | 15.40                       | 100                       | 31.4                | ND                              | ND                        | ND                        | No           |
| PRS6A               | GVLMYGPPGTGK          | Yes               | 588.8                  | 613.3                 | 15.40                       | 100                       | 31.4                | ND                              | ND                        | ND                        | No           |
| PRS6A               | GVLMYGPPGTGK          | Yes               | 588.8                  | 776.4                 | 15.40                       | 100                       | 31.4                | ND                              | ND                        | ND                        | No           |
| PRS6A               | GVLMYGPPGTGK          | Yes               | 588.8                  | 907.4                 | 15.40                       | 100                       | 31.4                | ND                              | ND                        | ND                        | No           |
| PRS6A               | LAGPQLVQMFIDGAK       | Yes               | 822.9                  | 1065.5                | 25.50                       | 100                       | 41.7                | ND                              | ND                        | ND                        | No           |
| PRS6A               | LAGPQLVQMFIDGAK       | Yes               | 822.9                  | 702.4                 | 25.50                       | 100                       | 41.7                | ND                              | ND                        | ND                        | No           |

**Table S5.** MRM assay of individual proteins.

| Protein<br>(_HUMAN) | Peptide          | MS/MS<br>spectrum | Precursor ion<br>(m/z) | Fragment ion<br>(m/z) | Retention time<br>(minutes) | Declustering<br>potential | Collision<br>energy | Area of<br>synthetic<br>peptide | Area in control<br>sample | Area in disease<br>sample | Interference |
|---------------------|------------------|-------------------|------------------------|-----------------------|-----------------------------|---------------------------|---------------------|---------------------------------|---------------------------|---------------------------|--------------|
| PRS6A               | LAGPQLVQMFIGDGAK | Yes               | 822.9                  | 838.4                 | 25.50                       | 100                       | 41.7                | ND                              | 55736                     | 44857                     | No           |
| PRS6A               | LAGPQLVQMFIGDGAK | Yes               | 822.9                  | 966.5                 | 25.50                       | 100                       | 41.7                | ND                              | 16190                     | 16601                     | No           |
| PRS6A               | QIQELVEAIVLPMNHK | Yes               | 621.3                  | 313.7                 | 24.10                       | 100                       | 32.2                | ND                              | 35061                     | 17523                     | No           |
| PRS6A               | QIQELVEAIVLPMNHK | Yes               | 621.3                  | 626.3                 | 24.10                       | 100                       | 32.2                | ND                              | 35100                     | 14838                     | No           |
| PRS6A               | QIQELVEAIVLPMNHK | Yes               | 621.3                  | 739.4                 | 24.10                       | 100                       | 32.2                | ND                              | 33602                     | 16891                     | No           |
| PRS6A               | QIQELVEAIVLPMNHK | Yes               | 621.3                  | 838.5                 | 24.10                       | 100                       | 32.2                | ND                              | 15616                     | 8028                      | No           |
| PRS6A               | QIQELVEAIVLPMNHK | Yes               | 931.5                  | 1022.6                | 24.10                       | 100                       | 46.5                | ND                              | ND                        | ND                        | No           |
| PRS6A               | QIQELVEAIVLPMNHK | Yes               | 931.5                  | 739.4                 | 24.10                       | 100                       | 46.5                | ND                              | ND                        | ND                        | No           |
| PRS6A               | QIQELVEAIVLPMNHK | Yes               | 931.5                  | 838.5                 | 24.10                       | 100                       | 46.5                | ND                              | ND                        | ND                        | No           |
| PRS6A               | QIQELVEAIVLPMNHK | Yes               | 931.5                  | 951.5                 | 24.10                       | 100                       | 46.5                | ND                              | ND                        | ND                        | No           |
| PRS6A               | VDILDPALLR       | Yes               | 562.8                  | 328.2                 | 18.82                       | 100                       | 30.3                | ND                              | 13790                     | 7143                      | No           |
| PRS6A               | VDILDPALLR       | Yes               | 562.8                  | 569.4                 | 18.82                       | 100                       | 36.3                | ND                              | 37667                     | 9857                      | No           |
| PRS6A               | VDILDPALLR       | Yes               | 562.8                  | 684.4                 | 18.82                       | 100                       | 30.3                | ND                              | 31287                     | 13854                     | No           |
| PRS6A               | VDILDPALLR       | Yes               | 562.8                  | 797.5                 | 18.82                       | 100                       | 27.3                | ND                              | 41349                     | 17299                     | No           |
| PSCA                | AVGLLTVISK       | Yes               | 500.82                 | 347.2                 | 18.26                       | 65.6                      | 33.5                | 82471                           | ND                        | ND                        | No           |
| PSCA                | AVGLLTVISK       | Yes               | 500.82                 | 547.3                 | 18.26                       | 65.6                      | 24.5                | 77656                           | ND                        | ND                        | No           |
| PSCA                | AVGLLTVISK       | Yes               | 500.82                 | 660.4                 | 18.26                       | 65.6                      | 24.5                | 122632                          | ND                        | ND                        | No           |
| PSCA                | AVGLLTVISK       | Yes               | 500.82                 | 830.5                 | 18.26                       | 65.6                      | 24.5                | 286806                          | ND                        | ND                        | No           |
| PTGIS               | AGYLTLYGIEALPR   | Yes               | 512.95                 | 272.2                 | 22.85                       | 67.2                      | 23.7                | 156593                          | ND                        | ND                        | No           |
| PTGIS               | AGYLTLYGIEALPR   | Yes               | 512.95                 | 456.3                 | 22.85                       | 67.2                      | 26.7                | 379281                          | ND                        | ND                        | No           |
| PTGIS               | AGYLTLYGIEALPR   | Yes               | 512.95                 | 585.3                 | 22.85                       | 67.2                      | 23.7                | 518928                          | ND                        | ND                        | No           |
| PTGIS               | AGYLTLYGIEALPR   | Yes               | 512.95                 | 755.4                 | 22.85                       | 67.2                      | 29.7                | 139317                          | ND                        | ND                        | No           |
| PTGIS               | DPEIYTDPEVFK     | Yes               | 726.85                 | 342.1                 | 17.29                       | 94.8                      | 43.5                | 1501781                         | ND                        | ND                        | No           |

**Table S5.** MRM assay of individual proteins.

| Protein<br>(_HUMAN) | Peptide                 | MS/MS<br>spectrum | Precursor ion<br>(m/z) | Fragment ion<br>(m/z) | Retention time<br>(minutes) | Declustering<br>potential | Collision<br>energy | Area of<br>synthetic<br>peptide | Area in control<br>sample | Area in disease<br>sample | Interference |
|---------------------|-------------------------|-------------------|------------------------|-----------------------|-----------------------------|---------------------------|---------------------|---------------------------------|---------------------------|---------------------------|--------------|
| PTGIS               | DPEIYTDPEVFK            | Yes               | 726.85                 | 619.3                 | 17.29                       | 94.8                      | 43.5                | 508525                          | ND                        | ND                        | No           |
| PTGIS               | DPEIYTDPEVFK            | Yes               | 726.85                 | 835.4                 | 17.29                       | 94.8                      | 34.5                | 246757                          | ND                        | ND                        | No           |
| PTGIS               | DPEIYTDPEVFK            | Yes               | 726.85                 | 998.5                 | 17.29                       | 94.8                      | 31.5                | 497005                          | ND                        | ND                        | No           |
| PTGIS               | EVVVDLAMPADGR           | Yes               | 751.87                 | 646.3                 | 19.93                       | 98                        | 35.6                | 655707                          | ND                        | ND                        | No           |
| PTGIS               | EVVVDLAMPADGR           | Yes               | 751.87                 | 777.3                 | 19.93                       | 98                        | 35.6                | 334644                          | ND                        | ND                        | No           |
| PTGIS               | EVVVDLAMPADGR           | Yes               | 751.87                 | 848.4                 | 19.93                       | 98                        | 35.6                | 360759                          | ND                        | ND                        | No           |
| PTGIS               | EVVVDLAMPADGR           | Yes               | 751.87                 | 961.5                 | 19.93                       | 98                        | 41.6                | 120473                          | ND                        | ND                        | No           |
| PTGIS               | GELESILWQAEQPVSQTTLTPQK | Yes               | 861.78                 | 372.2                 | 22.51                       | 112.2                     | 41.5                | 203105                          | ND                        | ND                        | No           |
| PTGIS               | GELESILWQAEQPVSQTTLTPQK | Yes               | 861.78                 | 485.3                 | 22.51                       | 112.2                     | 41.5                | 28516                           | ND                        | ND                        | No           |
| PTGIS               | GELESILWQAEQPVSQTTLTPQK | Yes               | 861.78                 | 742.4                 | 22.51                       | 112.2                     | 44.5                | 18098                           | ND                        | ND                        | No           |
| PTGIS               | GELESILWQAEQPVSQTTLTPQK | Yes               | 861.78                 | 788.5                 | 22.51                       | 112.2                     | 47.5                | 31883                           | ND                        | ND                        | No           |
| PTGIS               | HGDIFTILVGGR            | Yes               | 642.86                 | 310.1                 | 22.99                       | 83.9                      | 39.8                | 527727                          | ND                        | ND                        | No           |
| PTGIS               | HGDIFTILVGGR            | Yes               | 642.86                 | 423.2                 | 22.99                       | 83.9                      | 36.8                | 252665                          | ND                        | ND                        | No           |
| PTGIS               | HGDIFTILVGGR            | Yes               | 642.86                 | 715.4                 | 22.99                       | 83.9                      | 36.8                | 131406                          | ND                        | ND                        | No           |
| PTGIS               | HGDIFTILVGGR            | Yes               | 642.86                 | 862.5                 | 22.99                       | 83.9                      | 36.8                | 277938                          | ND                        | ND                        | No           |
| PTGIS               | IFDVQLPHYSPSDEK         | Yes               | 592.29                 | 276.2                 | 18.64                       | 77.4                      | 36.8                | 484721                          | ND                        | ND                        | No           |
| PTGIS               | IFDVQLPHYSPSDEK         | Yes               | 592.29                 | 376.2                 | 18.64                       | 77.4                      | 30.8                | 338854                          | ND                        | ND                        | No           |
| PTGIS               | IFDVQLPHYSPSDEK         | Yes               | 592.29                 | 662.3                 | 18.64                       | 77.4                      | 36.8                | 331765                          | ND                        | ND                        | No           |
| PTGIS               | IFDVQLPHYSPSDEK         | Yes               | 592.29                 | 825.4                 | 18.64                       | 77.4                      | 33.8                | 291884                          | ND                        | ND                        | No           |
| PTGIS               | LLFPFLSPQR              | Yes               | 665.9                  | 340.3                 | 25.29                       | 86.9                      | 34.8                | 2202922                         | ND                        | ND                        | No           |
| PTGIS               | LLFPFLSPQR              | Yes               | 665.9                  | 600.3                 | 25.29                       | 86.9                      | 40.8                | 474763                          | ND                        | ND                        | No           |
| PTGIS               | LLFPFLSPQR              | Yes               | 665.9                  | 747.4                 | 25.29                       | 86.9                      | 40.8                | 349550                          | ND                        | ND                        | No           |
| PTGIS               | LLFPFLSPQR              | Yes               | 665.9                  | 991.5                 | 25.29                       | 86.9                      | 34.8                | 408407                          | ND                        | ND                        | No           |



**Table S5.** MRM assay of individual proteins.

| Protein<br>(_HUMAN) | Peptide                       | MS/MS<br>spectrum | Precursor ion<br>(m/z) | Fragment ion<br>(m/z) | Retention time<br>(minutes) | Decustering<br>potential | Collision<br>energy | Area of<br>synthetic<br>peptide | Area in control<br>sample | Area in disease<br>sample | Interference |
|---------------------|-------------------------------|-------------------|------------------------|-----------------------|-----------------------------|--------------------------|---------------------|---------------------------------|---------------------------|---------------------------|--------------|
| PTGIS               | VHSADVHTFR                    | No                |                        |                       |                             |                          |                     |                                 |                           |                           |              |
| PTGIS               | VLDSTPVLDSVLSESLR             | Yes               | 915.5                  | 328.2                 | 24.11                       | 119.1                    | 48.8                | 125364                          | ND                        | ND                        | No           |
| PTGIS               | VLDSTPVLDSVLSESLR             | Yes               | 915.5                  | 516.3                 | 24.11                       | 119.1                    | 39.8                | 132134                          | ND                        | ND                        | No           |
| PTGIS               | VLDSTPVLDSVLSESLR             | Yes               | 915.5                  | 591.3                 | 24.11                       | 119.1                    | 39.8                | 58863                           | ND                        | ND                        | No           |
| PTGIS               | VLDSTPVLDSVLSESLR             | Yes               | 915.5                  | 890.5                 | 24.11                       | 119.1                    | 42.8                | 35814                           | ND                        | ND                        | No           |
| PTGIS               | YGFGLMQPEHDVPVR               | Yes               | 582.29                 | 371.2                 | 18.36                       | 76.1                     | 36.2                | 173552                          | ND                        | ND                        | No           |
| PTGIS               | YGFGLMQPEHDVPVR               | Yes               | 582.29                 | 470.3                 | 18.36                       | 76.1                     | 36.2                | 196226                          | ND                        | ND                        | No           |
| PTGIS               | YGFGLMQPEHDVPVR               | Yes               | 582.29                 | 722.4                 | 18.36                       | 76.1                     | 36.2                | 52001                           | ND                        | ND                        | No           |
| PTGIS               | YGFGLMQPEHDVPVR               | Yes               | 582.29                 | 948.5                 | 18.36                       | 76.1                     | 27.2                | 114080                          | ND                        | ND                        | No           |
| PTPA                | FGSLLPIHPVTSG                 | Yes               | 662.87                 | 292.1                 | 18.64                       | 86.5                     | 34.7                | 93586                           | ND                        | ND                        | No           |
| PTPA                | FGSLLPIHPVTSG                 | Yes               | 662.87                 | 597.3                 | 18.64                       | 86.5                     | 40.7                | 29405                           | ND                        | ND                        | No           |
| PTPA                | FGSLLPIHPVTSG                 | Yes               | 662.87                 | 807.4                 | 18.64                       | 86.5                     | 31.7                | 199555                          | ND                        | ND                        | No           |
| PTPA                | FGSLLPIHPVTSG                 | Yes               | 662.87                 | 920.5                 | 18.64                       | 86.5                     | 31.7                | 35169                           | ND                        | ND                        | No           |
| PTPA                | LDEEAENLVATVVPHTLAAAVPEVAVYLK | No                |                        |                       |                             |                          |                     |                                 |                           |                           |              |
| PTPA                | TGPFAEHSNQLWNISAVPSWSK        | Yes               | 819.4                  | 604.3                 | 20.62                       | 106.7                    | 45.3                | 38204                           | ND                        | ND                        | No           |
| PTPA                | TGPFAEHSNQLWNISAVPSWSK        | Yes               | 819.4                  | 774.4                 | 20.62                       | 106.7                    | 36.3                | 10483                           | ND                        | ND                        | No           |
| PTPA                | TGPFAEHSNQLWNISAVPSWSK        | Yes               | 819.4                  | 861.4                 | 20.62                       | 106.7                    | 36.3                | 30780                           | ND                        | ND                        | No           |
| PTPA                | TGPFAEHSNQLWNISAVPSWSK        | Yes               | 819.4                  | 974.5                 | 20.62                       | 106.7                    | 36.3                | 4767                            | ND                        | ND                        | No           |
| PTPA                | VDDQIAIVFK                    | Yes               | 574.32                 | 294.2                 | 17.40                       | 75.1                     | 30.8                | 20366                           | ND                        | ND                        | No           |
| PTPA                | VDDQIAIVFK                    | Yes               | 574.32                 | 393.3                 | 17.40                       | 75.1                     | 24.8                | 15685                           | ND                        | ND                        | No           |
| PTPA                | VDDQIAIVFK                    | Yes               | 574.32                 | 690.5                 | 17.40                       | 75.1                     | 27.8                | 12476                           | ND                        | 1621                      | No           |
| PTPA                | VDDQIAIVFK                    | Yes               | 574.32                 | 933.5                 | 17.40                       | 75.1                     | 27.8                | 9720                            | ND                        | ND                        | No           |
| PTPA                | WIDETPPVDQPSR                 | Yes               | 770.38                 | 487.3                 | 12.43                       | 100.4                    | 45.4                | 40752                           | ND                        | ND                        | No           |

**Table S5.** MRM assay of individual proteins.

| Protein<br>(_HUMAN) | Peptide          | MS/MS<br>spectrum | Precursor ion<br>(m/z) | Fragment ion<br>(m/z) | Retention time<br>(minutes) | Decustering<br>potential | Collision<br>energy | Area of<br>synthetic<br>peptide | Area in control<br>sample | Area in disease<br>sample | Interference |
|---------------------|------------------|-------------------|------------------------|-----------------------|-----------------------------|--------------------------|---------------------|---------------------------------|---------------------------|---------------------------|--------------|
| PTPA                | WIDETPPVDQPSR    | Yes               | 770.38                 | 645.3                 | 12.43                       | 100.4                    | 33.4                | 27965                           | ND                        | ND                        | No           |
| PTPA                | WIDETPPVDQPSR    | Yes               | 770.38                 | 895.5                 | 12.43                       | 100.4                    | 36.4                | 29750                           | ND                        | ND                        | No           |
| PTPA                | WIDETPPVDQPSR    | Yes               | 770.38                 | 996.5                 | 12.43                       | 100.4                    | 36.4                | 4746                            | ND                        | ND                        | No           |
| PTPRC               | DLQYSTDYTFK      | Yes               | 690.82                 | 294.2                 | 14.26                       | 90.1                     | 41.9                | 84108                           | ND                        | ND                        | No           |
| PTPRC               | DLQYSTDYTFK      | Yes               | 690.82                 | 357.2                 | 14.26                       | 90.1                     | 29.9                | 161971                          | ND                        | ND                        | No           |
| PTPRC               | DLQYSTDYTFK      | Yes               | 690.82                 | 395.2                 | 14.26                       | 90.1                     | 41.9                | 43075                           | ND                        | ND                        | No           |
| PTPRC               | DLQYSTDYTFK      | Yes               | 690.82                 | 861.4                 | 14.26                       | 90.1                     | 32.9                | 78102                           | ND                        | ND                        | No           |
| PTPRC               | SEAAHQGVITWNPPQR | Yes               | 597.64                 | 400.2                 | 12.79                       | 78.1                     | 37                  | 23172                           | ND                        | ND                        | No           |
| PTPRC               | SEAAHQGVITWNPPQR | Yes               | 597.64                 | 497.3                 | 12.79                       | 78.1                     | 28                  | 67926                           | ND                        | ND                        | No           |
| PTPRC               | SEAAHQGVITWNPPQR | Yes               | 597.64                 | 780.4                 | 12.79                       | 78.1                     | 37                  | 15611                           | ND                        | ND                        | No           |
| PTPRC               | SEAAHQGVITWNPPQR | Yes               | 597.64                 | 994.5                 | 12.79                       | 78.1                     | 25                  | 6303                            | ND                        | ND                        | No           |
| PTPRC               | TLILDVPPGVEK     | Yes               | 640.88                 | 328.2                 | 16.42                       | 83.7                     | 27.7                | 315717                          | ND                        | ND                        | No           |
| PTPRC               | TLILDVPPGVEK     | Yes               | 640.88                 | 725.4                 | 16.42                       | 83.7                     | 30.7                | 106646                          | ND                        | ND                        | No           |
| PTPRC               | TLILDVPPGVEK     | Yes               | 640.88                 | 840.4                 | 16.42                       | 83.7                     | 30.7                | 222926                          | ND                        | ND                        | No           |
| PTPRC               | TLILDVPPGVEK     | Yes               | 640.88                 | 953.5                 | 16.42                       | 83.7                     | 30.7                | 142920                          | ND                        | ND                        | No           |
| PTPRC               | YDLQNLKPYTK      | Yes               | 461.58                 | 279.1                 | 12.92                       | 60.5                     | 21.1                | 193901                          | ND                        | ND                        | No           |
| PTPRC               | YDLQNLKPYTK      | Yes               | 461.58                 | 508.3                 | 12.92                       | 60.5                     | 30.1                | 328966                          | ND                        | ND                        | No           |
| PTPRC               | YDLQNLKPYTK      | Yes               | 461.58                 | 636.4                 | 12.92                       | 60.5                     | 27.1                | 37715                           | ND                        | ND                        | No           |
| PTPRC               | YDLQNLKPYTK      | Yes               | 461.58                 | 863.5                 | 12.92                       | 60.5                     | 24.1                | 29296                           | ND                        | ND                        | No           |
| PTPRC               | YVDILPYDYNR      | Yes               | 715.85                 | 378.2                 | 17.38                       | 93.3                     | 34                  | 161115                          | ND                        | ND                        | No           |
| PTPRC               | YVDILPYDYNR      | Yes               | 715.85                 | 491.3                 | 17.38                       | 93.3                     | 34                  | 109277                          | ND                        | ND                        | No           |
| PTPRC               | YVDILPYDYNR      | Yes               | 715.85                 | 827.4                 | 17.38                       | 93.3                     | 34                  | 279264                          | ND                        | ND                        | No           |
| PTPRC               | YVDILPYDYNR      | Yes               | 715.85                 | 940.5                 | 17.38                       | 93.3                     | 31                  | 48676                           | ND                        | ND                        | No           |

**Table S5.** MRM assay of individual proteins.

| Protein<br>(_HUMAN) | Peptide                   | MS/MS<br>spectrum | Precursor ion<br>(m/z) | Fragment ion<br>(m/z) | Retention time<br>(minutes) | Declustering<br>potential | Collision<br>energy | Area of<br>synthetic<br>peptide | Area in control<br>sample | Area in disease<br>sample | Interference                           |
|---------------------|---------------------------|-------------------|------------------------|-----------------------|-----------------------------|---------------------------|---------------------|---------------------------------|---------------------------|---------------------------|----------------------------------------|
| PTPRJ               | AGSPTAPVHDESLVGPVDPSSGQQR | Yes               | 859.08                 | 662.3                 | 12.08                       | 111.8                     | 50.4                | 2220                            | ND                        | ND                        | No                                     |
| PTPRJ               | AGSPTAPVHDESLVGPVDPSSGQQR | Yes               | 859.08                 | 749.4                 | 12.08                       | 111.8                     | 47.4                | 2096                            | 486                       | ND                        | No                                     |
| PTPRJ               | AGSPTAPVHDESLVGPVDPSSGQQR | Yes               | 859.08                 | 961.4                 | 12.08                       | 111.8                     | 38.4                | 4263                            | ND                        | ND                        | No                                     |
| PTPRJ               | AVSISPTNVILTWK            | Yes               | 764.94                 | 258.1                 | 21.31                       | 99.7                      | 36.2                | 12528                           | 30868                     | 32783                     | No                                     |
| PTPRJ               | AVSISPTNVILTWK            | Yes               | 764.94                 | 434.2                 | 21.31                       | 99.7                      | 36.2                | 5005                            | 9961                      | 12748                     | No                                     |
| PTPRJ               | AVSISPTNVILTWK            | Yes               | 764.94                 | 458.3                 | 21.31                       | 99.7                      | 33.2                | 10454                           | 23820                     | 22010                     | No                                     |
| PTPRJ               | AVSISPTNVILTWK            | Yes               | 764.94                 | 547.3                 | 21.31                       | 99.7                      | 42.2                | 5949                            | 13603                     | 9396                      | No                                     |
| PTPRJ               | TPSSTGSPVFDIK             | Yes               | 716.87                 | 260.2                 | 14.98                       | 93.5                      | 34                  | 333148                          | 26596                     | 33358                     | No                                     |
| PTPRJ               | TPSSTGSPVFDIK             | Yes               | 716.87                 | 522.3                 | 14.98                       | 93.5                      | 43                  | 136301                          | 12500                     | 13826                     | No                                     |
| PTPRJ               | TPSSTGSPVFDIK             | Yes               | 716.87                 | 902.5                 | 14.98                       | 93.5                      | 40                  | 147716                          | 9215                      | 10517                     | No                                     |
| PTPRJ               | TPSSTGSPVFDIK             | Yes               | 716.87                 | 959.5                 | 14.98                       | 93.5                      | 37                  | 179272                          | 10592                     | 12066                     | No                                     |
| PTPRJ               | VITEPIVSDLR               | Yes               | 669.89                 | 288.2                 | 15.87                       | 87.4                      | 41                  | 123416                          | 110071                    | 116804                    | No                                     |
| PTPRJ               | VITEPIVSDLR               | Yes               | 669.89                 | 314.2                 | 15.87                       | 87.4                      | 35                  | 69889                           | 52537                     | 67558                     | No                                     |
| PTPRJ               | VITEPIVSDLR               | Yes               | 669.89                 | 443.3                 | 15.87                       | 87.4                      | 29                  | 71970                           | 61358                     | 56714                     | No                                     |
| PTPRJ               | VITEPIVSDLR               | Yes               | 669.89                 | 896.5                 | 15.87                       | 87.4                      | 32                  | 180212                          | 153508                    | 162361                    | No                                     |
| PTPRJ               | VLLESIGSHEELTQDSR         | Yes               | 638.33                 | 262.2                 | 14.51                       | 83.3                      | 39.1                | 161418                          | 118246                    | 151314                    | Yes (Based on<br>Transition<br>Ratios) |
| PTPRJ               | VLLESIGSHEELTQDSR         | Yes               | 638.33                 | 606.3                 | 14.51                       | 83.3                      | 39.1                | 201524                          | 29712                     | 31102                     | No                                     |
| PTPRJ               | VLLESIGSHEELTQDSR         | Yes               | 638.33                 | 719.4                 | 14.51                       | 83.3                      | 39.1                | 83592                           | 12931                     | 22498                     | No                                     |
| PTPRJ               | VLLESIGSHEELTQDSR         | Yes               | 638.33                 | 848.4                 | 14.51                       | 83.3                      | 33.1                | ND                              | 11877                     | 5526                      | Yes (Based on<br>Manual<br>Review)     |
| PVR                 | EGPPSEHSGISR              | Yes               | 626.8                  | 519.3                 | 6.20                        | 81.9                      | 36.1                | 7517                            | ND                        | ND                        | No                                     |

**Table S5.** MRM assay of individual proteins.

| Protein<br>(_HUMAN) | Peptide        | MS/MS<br>spectrum | Precursor ion<br>(m/z) | Fragment ion<br>(m/z) | Retention time<br>(minutes) | Declustering<br>potential | Collision<br>energy | Area of<br>synthetic<br>peptide | Area in control<br>sample | Area in disease<br>sample | Interference |
|---------------------|----------------|-------------------|------------------------|-----------------------|-----------------------------|---------------------------|---------------------|---------------------------------|---------------------------|---------------------------|--------------|
| PVR                 | EGPPSEHSGISR   | Yes               | 626.8                  | 656.3                 | 6.20                        | 81.9                      | 39.1                | 9148                            | ND                        | ND                        | No           |
| PVR                 | EGPPSEHSGISR   | Yes               | 626.8                  | 872.4                 | 6.20                        | 81.9                      | 39.1                | 5370                            | ND                        | ND                        | No           |
| PVR                 | EGPPSEHSGISR   | Yes               | 626.8                  | 969.5                 | 6.20                        | 81.9                      | 39.1                | 11179                           | ND                        | ND                        | No           |
| PVR                 | ENSSSQDPQTEGTR | Yes               | 768.33                 | 333.2                 | 5.45                        | 100.1                     | 33.3                | 15133                           | ND                        | ND                        | No           |
| PVR                 | ENSSSQDPQTEGTR | Yes               | 768.33                 | 563.3                 | 5.45                        | 100.1                     | 42.3                | 9419                            | ND                        | ND                        | No           |
| PVR                 | ENSSSQDPQTEGTR | Yes               | 768.33                 | 788.4                 | 5.45                        | 100.1                     | 42.3                | 60537                           | ND                        | ND                        | No           |
| PVR                 | ENSSSQDPQTEGTR | Yes               | 768.33                 | 903.4                 | 5.45                        | 100.1                     | 39.3                | 13459                           | ND                        | ND                        | No           |
| PVR                 | QAELTVQVK      | Yes               | 508.29                 | 473.3                 | 13.28                       | 66.6                      | 24.9                | 3998                            | ND                        | ND                        | No           |
| PVR                 | QAELTVQVK      | Yes               | 508.29                 | 574.4                 | 13.28                       | 66.6                      | 24.9                | 47277                           | ND                        | ND                        | No           |
| PVR                 | QAELTVQVK      | Yes               | 508.29                 | 687.4                 | 13.28                       | 66.6                      | 24.9                | 17273                           | ND                        | ND                        | No           |
| PVR                 | QAELTVQVK      | Yes               | 508.29                 | 816.5                 | 13.28                       | 66.6                      | 33.9                | 2581                            | ND                        | ND                        | No           |
| PVR                 | SVDIWLRL       | Yes               | 444.75                 | 302.1                 | 16.87                       | 58.4                      | 22.1                | 22809                           | 96590                     | 97613                     | No           |
| PVR                 | SVDIWLRL       | Yes               | 444.75                 | 474.3                 | 16.87                       | 58.4                      | 22.1                | 18205                           | 117062                    | 104481                    | No           |
| PVR                 | SVDIWLRL       | Yes               | 444.75                 | 587.4                 | 16.87                       | 58.4                      | 31.1                | 13053                           | 61747                     | 76450                     | No           |
| PVR                 | SVDIWLRL       | Yes               | 444.75                 | 702.4                 | 16.87                       | 58.4                      | 22.1                | 54572                           | 283778                    | 342198                    | No           |
| PVR                 | VLAKPQNTAEVQK  | Yes               | 475.94                 | 374.2                 | 6.81                        | 62.4                      | 27.8                | 34361                           | 15637                     | 21662                     | No           |
| PVR                 | VLAKPQNTAEVQK  | Yes               | 475.94                 | 503.3                 | 6.81                        | 62.4                      | 21.8                | 22727                           | 12199                     | 14154                     | No           |
| PVR                 | VLAKPQNTAEVQK  | Yes               | 475.94                 | 574.3                 | 6.81                        | 62.4                      | 21.8                | 43193                           | 16786                     | 17291                     | No           |
| PVR                 | VLAKPQNTAEVQK  | Yes               | 475.94                 | 789.4                 | 6.81                        | 62.4                      | 27.8                | 31934                           | 13608                     | 20565                     | No           |
| RAB32               | DNINIEEAAR     | Yes               | 572.78                 | 317.2                 | 10.78                       | 74.9                      | 33.7                | 19604                           | ND                        | ND                        | No           |
| RAB32               | DNINIEEAAR     | Yes               | 572.78                 | 457.2                 | 10.78                       | 74.9                      | 27.7                | 17583                           | ND                        | ND                        | No           |
| RAB32               | DNINIEEAAR     | Yes               | 572.78                 | 688.4                 | 10.78                       | 74.9                      | 27.7                | 26678                           | ND                        | ND                        | No           |
| RAB32               | DNINIEEAAR     | Yes               | 572.78                 | 802.4                 | 10.78                       | 74.9                      | 27.7                | 56526                           | ND                        | ND                        | No           |

**Table S5.** MRM assay of individual proteins.

| Protein<br>(_HUMAN) | Peptide               | MS/MS<br>spectrum | Precursor ion<br>(m/z) | Fragment ion<br>(m/z) | Retention time<br>(minutes) | Declustering<br>potential | Collision<br>energy | Area of<br>synthetic<br>peptide | Area in control<br>sample | Area in disease<br>sample | Interference |
|---------------------|-----------------------|-------------------|------------------------|-----------------------|-----------------------------|---------------------------|---------------------|---------------------------------|---------------------------|---------------------------|--------------|
| RAB32               | ILVNHQSFPNEENDVDK     | Yes               | 666.66                 | 262.1                 | 11.33                       | 87                        | 37.5                | ND                              | ND                        | ND                        | No           |
| RAB32               | ILVNHQSFPNEENDVDK     | Yes               | 666.66                 | 719.3                 | 11.33                       | 87                        | 31.5                | ND                              | ND                        | ND                        | No           |
| RAB32               | ILVNHQSFPNEENDVDK     | Yes               | 666.66                 | 939.5                 | 11.33                       | 87                        | 28.5                | ND                              | ND                        | ND                        | No           |
| RAB32               | ILVNHQSFPNEENDVDK     | Yes               | 666.66                 | 962.4                 | 11.33                       | 87                        | 31.5                | ND                              | ND                        | ND                        | No           |
| RAB32               | LDQETLR               | No                |                        |                       |                             |                           |                     |                                 |                           |                           |              |
| RAB32               | VHLPNGSPIPAVLLANK     | Yes               | 580.68                 | 558.4                 | 18.62                       | 75.9                      | 36.2                | 79050                           | ND                        | ND                        | No           |
| RAB32               | VHLPNGSPIPAVLLANK     | Yes               | 580.68                 | 705.4                 | 18.62                       | 75.9                      | 27.2                | 137728                          | ND                        | ND                        | No           |
| RAB32               | VHLPNGSPIPAVLLANK     | Yes               | 580.68                 | 825.5                 | 18.62                       | 75.9                      | 27.2                | 404908                          | ND                        | ND                        | No           |
| RAB32               | VHLPNGSPIPAVLLANK     | Yes               | 580.68                 | 915.5                 | 18.62                       | 75.9                      | 27.2                | 83964                           | ND                        | ND                        | No           |
| RAB32               | VLVIGELGVGK           | Yes               | 542.34                 | 312.2                 | 17.62                       | 71                        | 26.4                | 283213                          | ND                        | ND                        | No           |
| RAB32               | VLVIGELGVGK           | Yes               | 542.34                 | 659.4                 | 17.62                       | 71                        | 26.4                | 245151                          | ND                        | ND                        | No           |
| RAB32               | VLVIGELGVGK           | Yes               | 542.34                 | 772.5                 | 17.62                       | 71                        | 26.4                | 210012                          | ND                        | ND                        | No           |
| RAB32               | VLVIGELGVGK           | Yes               | 542.34                 | 871.5                 | 17.62                       | 71                        | 26.4                | 155956                          | ND                        | ND                        | No           |
| RAGE                | AELNQSEEPAGESSTGGP    | Yes               | 944.91                 | 691.3                 | 9.23                        | 122.9                     | 47.1                | 1479                            | ND                        | ND                        | No           |
| RAGE                | AELNQSEEPAGESSTGGP    | Yes               | 944.91                 | 762.3                 | 9.23                        | 122.9                     | 41.1                | 2781                            | ND                        | ND                        | No           |
| RAGE                | AELNQSEEPAGESSTGGP    | Yes               | 944.91                 | 901.4                 | 9.23                        | 122.9                     | 41.1                | 2446                            | ND                        | ND                        | No           |
| RAGE                | AELNQSEEPAGESSTGGP    | Yes               | 944.91                 | 988.4                 | 9.23                        | 122.9                     | 44.1                | 4492                            | ND                        | ND                        | No           |
| RAGE                | IGEPLVLK              | Yes               | 434.78                 | 300.2                 | 13.70                       | 57.1                      | 21.6                | 642182                          | ND                        | 1139                      | No           |
| RAGE                | IGEPLVLK              | Yes               | 434.78                 | 569.4                 | 13.70                       | 57.1                      | 21.6                | 740035                          | ND                        | 3021                      | No           |
| RAGE                | IGEPLVLK              | Yes               | 434.78                 | 698.4                 | 13.70                       | 57.1                      | 21.6                | 194909                          | ND                        | 3371                      | No           |
| RAGE                | IGEPLVLK              | Yes               | 434.78                 | 755.5                 | 13.70                       | 57.1                      | 21.6                | 1012378                         | 2600                      | 6308                      | No           |
| RAGE                | VLPNGSLFLPAVGIQDEGIFR | Yes               | 1121.62                | 621.3                 | 24.48                       | 145.7                     | 60.9                | 26881                           | ND                        | ND                        | No           |
| RAGE                | VLPNGSLFLPAVGIQDEGIFR | Yes               | 1121.62                | 681.4                 | 24.48                       | 145.7                     | 48.9                | 12004                           | ND                        | ND                        | No           |

**Table S5.** MRM assay of individual proteins.

| Protein<br>(_HUMAN) | Peptide                  | MS/MS<br>spectrum | Precursor ion<br>(m/z) | Fragment ion<br>(m/z) | Retention time<br>(minutes) | Declustering<br>potential | Collision<br>energy | Area of<br>synthetic<br>peptide | Area in control<br>sample | Area in disease<br>sample | Interference |
|---------------------|--------------------------|-------------------|------------------------|-----------------------|-----------------------------|---------------------------|---------------------|---------------------------------|---------------------------|---------------------------|--------------|
| RAGE                | VLPNGSLFLPAVGIQDEGIFR    | Yes               | 1121.62                | 828.5                 | 24.48                       | 145.7                     | 48.9                | 29372                           | ND                        | ND                        | No           |
| RAGE                | VLPNGSLFLPAVGIQDEGIFR    | Yes               | 1121.62                | 941.5                 | 24.48                       | 145.7                     | 48.9                | 32952                           | ND                        | ND                        | No           |
| RAGE                | VLSPQGGGPWDSVAR          | Yes               | 763.39                 | 547.3                 | 14.71                       | 99.5                      | 42.1                | 21829                           | ND                        | ND                        | No           |
| RAGE                | VLSPQGGGPWDSVAR          | Yes               | 763.39                 | 830.4                 | 14.71                       | 99.5                      | 45.1                | 21005                           | ND                        | ND                        | No           |
| RAGE                | VLSPQGGGPWDSVAR          | Yes               | 763.39                 | 887.4                 | 14.71                       | 99.5                      | 45.1                | 11778                           | ND                        | ND                        | No           |
| RAGE                | VLSPQGGGPWDSVAR          | Yes               | 763.39                 | 944.5                 | 14.71                       | 99.5                      | 39.1                | 10928                           | ND                        | ND                        | No           |
| RAGE                | VYQIPGKPEIVDSASELTAGVPNK | Yes               | 838.11                 | 358.2                 | 16.95                       | 109.1                     | 40.3                | 31793                           | ND                        | ND                        | No           |
| RAGE                | VYQIPGKPEIVDSASELTAGVPNK | Yes               | 838.11                 | 391.2                 | 16.95                       | 109.1                     | 40.3                | 25875                           | ND                        | ND                        | No           |
| RAGE                | VYQIPGKPEIVDSASELTAGVPNK | Yes               | 838.11                 | 514.3                 | 16.95                       | 109.1                     | 49.3                | 3469                            | ND                        | ND                        | No           |
| RAGE                | VYQIPGKPEIVDSASELTAGVPNK | Yes               | 838.11                 | 686.4                 | 16.95                       | 109.1                     | 40.3                | 5536                            | ND                        | ND                        | No           |
| RAN                 | FNVWDTAGQEK              | Yes               | 647.81                 | 262.1                 | 14.74                       | 84.6                      | 31                  | 858762                          | 5638                      | 3588                      | No           |
| RAN                 | FNVWDTAGQEK              | Yes               | 647.81                 | 461.2                 | 14.74                       | 84.6                      | 40                  | 71918                           | ND                        | ND                        | No           |
| RAN                 | FNVWDTAGQEK              | Yes               | 647.81                 | 748.3                 | 14.74                       | 84.6                      | 40                  | 123355                          | ND                        | ND                        | No           |
| RAN                 | FNVWDTAGQEK              | Yes               | 647.81                 | 934.4                 | 14.74                       | 84.6                      | 31                  | 153257                          | ND                        | ND                        | No           |
| RAN                 | LVLVGDGGTGK              | Yes               | 508.29                 | 326.2                 | 11.32                       | 66.6                      | 24.9                | 416446                          | ND                        | ND                        | No           |
| RAN                 | LVLVGDGGTGK              | Yes               | 508.29                 | 591.3                 | 11.32                       | 66.6                      | 24.9                | 562567                          | ND                        | ND                        | No           |
| RAN                 | LVLVGDGGTGK              | Yes               | 508.29                 | 690.3                 | 11.32                       | 66.6                      | 24.9                | 241811                          | ND                        | ND                        | No           |
| RAN                 | LVLVGDGGTGK              | Yes               | 508.29                 | 803.4                 | 11.32                       | 66.6                      | 24.9                | 426148                          | ND                        | ND                        | No           |
| RAN                 | NVPNWHR                  | Yes               | 308.16                 | 498.3                 | 8.37                        | 40.8                      | 19.3                | 7198                            | ND                        | ND                        | No           |
| RAN                 | NVPNWHR                  | Yes               | 308.16                 | 612.3                 | 8.37                        | 40.8                      | 16.3                | 3642                            | ND                        | ND                        | No           |
| RAP2B               | ASVDELFAEIVR             | Yes               | 674.86                 | 373.2                 | 24.20                       | 88.1                      | 32.2                | 14181                           | ND                        | ND                        | No           |
| RAP2B               | ASVDELFAEIVR             | Yes               | 674.86                 | 587.4                 | 24.20                       | 88.1                      | 32.2                | 37846                           | ND                        | ND                        | No           |
| RAP2B               | ASVDELFAEIVR             | Yes               | 674.86                 | 734.4                 | 24.20                       | 88.1                      | 32.2                | 51901                           | ND                        | ND                        | No           |

**Table S5.** MRM assay of individual proteins.

| Protein<br>(_HUMAN) | Peptide         | MS/MS<br>spectrum | Precursor ion<br>(m/z) | Fragment ion<br>(m/z) | Retention time<br>(minutes) | Decustering<br>potential | Collision<br>energy | Area of<br>synthetic<br>peptide | Area in control<br>sample | Area in disease<br>sample | Interference |
|---------------------|-----------------|-------------------|------------------------|-----------------------|-----------------------------|--------------------------|---------------------|---------------------------------|---------------------------|---------------------------|--------------|
| RAP2B               | ASVDELFAEIVR    | Yes               | 674.86                 | 847.5                 | 24.20                       | 88.1                     | 32.2                | 22881                           | ND                        | ND                        | No           |
| RAP2B               | EVSYGEGK        | Yes               | 434.71                 | 333.2                 | 6.12                        | 57.1                     | 18.6                | 48293                           | ND                        | ND                        | No           |
| RAP2B               | EVSYGEGK        | Yes               | 434.71                 | 390.2                 | 6.12                        | 57.1                     | 24.6                | 693650                          | ND                        | ND                        | No           |
| RAP2B               | EVSYGEGK        | Yes               | 434.71                 | 553.3                 | 6.12                        | 57.1                     | 21.6                | 214059                          | ND                        | ND                        | No           |
| RAP2B               | EVSYGEGK        | Yes               | 434.71                 | 640.3                 | 6.12                        | 57.1                     | 21.6                | 472268                          | ND                        | ND                        | No           |
| RAP2B               | SALTVQFVTGSFIEK | No                |                        |                       |                             |                          |                     |                                 |                           |                           |              |
| RAP2B               | VDLEGER         | Yes               | 409.21                 | 361.2                 | 7.88                        | 53.8                     | 29.5                | 51707                           | ND                        | ND                        | No           |
| RAP2B               | VDLEGER         | Yes               | 409.21                 | 490.2                 | 7.88                        | 53.8                     | 29.5                | 18844                           | ND                        | ND                        | No           |
| RAP2B               | VDLEGER         | Yes               | 409.21                 | 603.3                 | 7.88                        | 53.8                     | 20.5                | 63894                           | ND                        | ND                        | No           |
| RAP2B               | VDLEGER         | Yes               | 409.21                 | 718.3                 | 7.88                        | 53.8                     | 20.5                | 39225                           | ND                        | ND                        | No           |
| RAP2B               | VVVLGSGGVGK     | Yes               | 324.53                 | 360.2                 | 9.84                        | 42.9                     | 17.1                | ND                              | ND                        | ND                        | No           |
| RAP2B               | VVVLGSGGVGK     | Yes               | 324.53                 | 417.2                 | 9.84                        | 42.9                     | 20.1                | ND                              | ND                        | ND                        | No           |
| RAP2B               | VVVLGSGGVGK     | Yes               | 324.53                 | 561.3                 | 9.84                        | 42.9                     | 20.1                | 751                             | ND                        | ND                        | No           |
| RAP2B               | VVVLGSGGVGK     | Yes               | 324.53                 | 674.4                 | 9.84                        | 42.9                     | 23.1                | ND                              | ND                        | ND                        | No           |
| RAP2C               | SALTVQFVTGTFIEK | No                |                        |                       |                             |                          |                     |                                 |                           |                           |              |
| RAP2C               | VDLEPER         | No                |                        |                       |                             |                          |                     |                                 |                           |                           |              |
| RAP2C               | VPLILVGNK       | Yes               | 476.81                 | 530.3                 | 15.42                       | 62.5                     | 26.5                | 126877                          | ND                        | ND                        | No           |
| RAP2C               | VPLILVGNK       | Yes               | 476.81                 | 643.4                 | 15.42                       | 62.5                     | 26.5                | 147551                          | ND                        | ND                        | No           |
| RAP2C               | VPLILVGNK       | Yes               | 476.81                 | 756.5                 | 15.42                       | 62.5                     | 23.5                | 88717                           | ND                        | ND                        | No           |
| RAP2C               | VPLILVGNK       | Yes               | 476.81                 | 853.6                 | 15.42                       | 62.5                     | 32.5                | 15714                           | ND                        | ND                        | No           |
| RAP2C               | VVVLGSGGVGK     | Yes               | 324.53                 | 360.2                 | 9.84                        | 42.9                     | 17.1                | ND                              | ND                        | ND                        | No           |
| RAP2C               | VVVLGSGGVGK     | Yes               | 324.53                 | 417.2                 | 9.84                        | 42.9                     | 20.1                | ND                              | ND                        | ND                        | No           |
| RAP2C               | VVVLGSGGVGK     | Yes               | 324.53                 | 561.3                 | 9.84                        | 42.9                     | 20.1                | 751                             | ND                        | ND                        | No           |

**Table S5.** MRM assay of individual proteins.

| Protein<br>(_HUMAN) | Peptide        | MS/MS<br>spectrum | Precursor ion<br>(m/z) | Fragment ion<br>(m/z) | Retention time<br>(minutes) | Decustering<br>potential | Collision<br>energy | Area of<br>synthetic<br>peptide | Area in control<br>sample | Area in disease<br>sample | Interference |
|---------------------|----------------|-------------------|------------------------|-----------------------|-----------------------------|--------------------------|---------------------|---------------------------------|---------------------------|---------------------------|--------------|
| RAP2C               | VVVLGSGGVGK    | Yes               | 324.53                 | 674.4                 | 9.84                        | 42.9                     | 23.1                | ND                              | ND                        | ND                        | No           |
| RCN3                | AGDGDGWVSLAELR | Yes               | 723.35                 | 416.1                 | 19.87                       | 94.3                     | 34.3                | 28885                           | ND                        | ND                        | No           |
| RCN3                | AGDGDGWVSLAELR | Yes               | 723.35                 | 488.3                 | 19.87                       | 94.3                     | 34.3                | 26051                           | ND                        | ND                        | No           |
| RCN3                | AGDGDGWVSLAELR | Yes               | 723.35                 | 688.4                 | 19.87                       | 94.3                     | 34.3                | 65108                           | ND                        | ND                        | No           |
| RCN3                | AGDGDGWVSLAELR | Yes               | 723.35                 | 787.5                 | 19.87                       | 94.3                     | 34.3                | 59833                           | ND                        | ND                        | No           |
| RCN3                | AWIAHTQQR      | Yes               | 555.79                 | 258.1                 | 7.95                        | 72.7                     | 30                  | ND                              | ND                        | ND                        | No           |
| RCN3                | AWIAHTQQR      | Yes               | 555.79                 | 371.2                 | 7.95                        | 72.7                     | 27                  | ND                              | ND                        | ND                        | No           |
| RCN3                | AWIAHTQQR      | Yes               | 555.79                 | 532.3                 | 7.95                        | 72.7                     | 33                  | ND                              | ND                        | ND                        | No           |
| RCN3                | AWIAHTQQR      | Yes               | 555.79                 | 853.5                 | 7.95                        | 72.7                     | 36                  | ND                              | ND                        | ND                        | No           |
| RCN3                | DIVIAETLEDLDR  | Yes               | 751.39                 | 328.2                 | 22.08                       | 97.9                     | 32.6                | 14427                           | ND                        | ND                        | No           |
| RCN3                | DIVIAETLEDLDR  | Yes               | 751.39                 | 647.3                 | 22.08                       | 97.9                     | 35.6                | 5210                            | ND                        | ND                        | No           |
| RCN3                | DIVIAETLEDLDR  | Yes               | 751.39                 | 861.4                 | 22.08                       | 97.9                     | 35.6                | 3650                            | ND                        | ND                        | No           |
| RCN3                | DIVIAETLEDLDR  | Yes               | 751.39                 | 990.5                 | 22.08                       | 97.9                     | 35.6                | 3831                            | ND                        | ND                        | No           |
| RCN3                | EFDQLTPEESQAR  | Yes               | 775.36                 | 374.2                 | 11.64                       | 101                      | 45.6                | 30224                           | ND                        | ND                        | No           |
| RCN3                | EFDQLTPEESQAR  | Yes               | 775.36                 | 734.3                 | 11.64                       | 101                      | 36.6                | 6019                            | ND                        | ND                        | No           |
| RCN3                | EFDQLTPEESQAR  | Yes               | 775.36                 | 816.4                 | 11.64                       | 101                      | 36.6                | 69648                           | ND                        | ND                        | No           |
| RCN3                | EFDQLTPEESQAR  | Yes               | 775.36                 | 917.4                 | 11.64                       | 101                      | 45.6                | 24932                           | ND                        | ND                        | No           |
| RCN3                | VGWEELR        | Yes               | 444.73                 | 417.2                 | 13.21                       | 58.4                     | 22.1                | 2057                            | ND                        | ND                        | No           |
| RCN3                | VGWEELR        | Yes               | 444.73                 | 546.3                 | 13.21                       | 58.4                     | 19.1                | ND                              | ND                        | ND                        | No           |
| RCN3                | VGWEELR        | Yes               | 444.73                 | 732.4                 | 13.21                       | 58.4                     | 25.1                | ND                              | ND                        | ND                        | No           |
| RCN3                | VGWEELR        | Yes               | 444.73                 | 789.4                 | 13.21                       | 58.4                     | 31.1                | ND                              | ND                        | ND                        | No           |
| RL24                | VFQFLNAK       | Yes               | 483.77                 | 445.3                 | 16.67                       | 63.4                     | 32.8                | 174791                          | ND                        | ND                        | No           |
| RL24                | VFQFLNAK       | Yes               | 483.77                 | 592.3                 | 16.67                       | 63.4                     | 23.8                | 275187                          | ND                        | ND                        | No           |



**Table S5.** MRM assay of individual proteins.

| Protein<br>(_HUMAN) | Peptide                   | MS/MS<br>spectrum | Precursor ion<br>(m/z) | Fragment ion<br>(m/z) | Retention time<br>(minutes) | Decustering<br>potential | Collision<br>energy | Area of<br>synthetic<br>peptide | Area in control<br>sample | Area in disease<br>sample | Interference                           |
|---------------------|---------------------------|-------------------|------------------------|-----------------------|-----------------------------|--------------------------|---------------------|---------------------------------|---------------------------|---------------------------|----------------------------------------|
| RL24                | VFQFLNAK                  | Yes               | 483.77                 | 720.4                 | 16.67                       | 63.4                     | 23.8                | 327998                          | ND                        | ND                        | No                                     |
| RL24                | VFQFLNAK                  | Yes               | 483.77                 | 867.5                 | 16.67                       | 63.4                     | 23.8                | 67580                           | ND                        | ND                        | No                                     |
| S10A1               | DVDAVDK                   | Yes               | 381.19                 | 262.1                 | 6.01                        | 50.2                     | 28.3                | 528766                          | 14896                     | 17878                     | Yes (Based on<br>Transition<br>Ratios) |
| S10A1               | DVDAVDK                   | Yes               | 381.19                 | 330.1                 | 6.01                        | 50.2                     | 19.3                | 67402                           | ND                        | ND                        | No                                     |
| S10A1               | DVDAVDK                   | Yes               | 381.19                 | 432.2                 | 6.01                        | 50.2                     | 19.3                | 147420                          | ND                        | ND                        | No                                     |
| S10A1               | DVDAVDK                   | Yes               | 381.19                 | 547.3                 | 6.01                        | 50.2                     | 19.3                | 1361694                         | 322694                    | 278264                    | Yes (Based on<br>Transition<br>Ratios) |
| S10A1               | ELLQTELSGFLDAQK           | Yes               | 846.45                 | 461.2                 | 22.61                       | 110.2                    | 36.7                | 12426                           | ND                        | ND                        | No                                     |
| S10A1               | ELLQTELSGFLDAQK           | Yes               | 846.45                 | 721.4                 | 22.61                       | 110.2                    | 36.7                | 3990                            | ND                        | ND                        | No                                     |
| S10A1               | ELLQTELSGFLDAQK           | Yes               | 846.45                 | 778.4                 | 22.61                       | 110.2                    | 39.7                | 18561                           | ND                        | ND                        | No                                     |
| S10A1               | ELLQTELSGFLDAQK           | Yes               | 846.45                 | 978.5                 | 22.61                       | 110.2                    | 39.7                | 13013                           | ND                        | ND                        | No                                     |
| S10A6               | DQEVNFQEYVTFGLALALIYNEALK | No                |                        |                       |                             |                          |                     |                                 |                           |                           |                                        |
| S10A6               | ELTIGSK                   | Yes               | 374.22                 | 291.2                 | 8.73                        | 49.3                     | 19                  | ND                              | 24997                     | 27801                     | Yes (Based on<br>Manual<br>Review)     |
| S10A6               | ELTIGSK                   | Yes               | 374.22                 | 404.3                 | 8.73                        | 49.3                     | 19                  | 205261                          | 3676                      | 6124                      | No                                     |
| S10A6               | ELTIGSK                   | Yes               | 374.22                 | 505.3                 | 8.73                        | 49.3                     | 19                  | 251227                          | 5278                      | 9418                      | No                                     |
| S10A6               | ELTIGSK                   | Yes               | 374.22                 | 618.4                 | 8.73                        | 49.3                     | 22                  | 10567                           | ND                        | ND                        | No                                     |
| S10A6               | LQDAEIAR                  | Yes               | 458.25                 | 359.2                 | 8.02                        | 60.1                     | 31.7                | ND                              | 10713                     | 18949                     | Yes (Based on<br>Manual<br>Review)     |
| S10A6               | LQDAEIAR                  | Yes               | 458.25                 | 559.3                 | 8.02                        | 60.1                     | 31.7                | 29745                           | 23029                     | 16082                     | No                                     |
| S10A6               | LQDAEIAR                  | Yes               | 458.25                 | 674.3                 | 8.02                        | 60.1                     | 22.7                | 80482                           | 45910                     | 62354                     | No                                     |

**Table S5.** MRM assay of individual proteins.

| Protein<br>(_HUMAN) | Peptide              | MS/MS<br>spectrum | Precursor ion<br>(m/z) | Fragment ion<br>(m/z) | Retention time<br>(minutes) | Decustering<br>potential | Collision<br>energy | Area of<br>synthetic<br>peptide | Area in control<br>sample | Area in disease<br>sample | Interference                       |
|---------------------|----------------------|-------------------|------------------------|-----------------------|-----------------------------|--------------------------|---------------------|---------------------------------|---------------------------|---------------------------|------------------------------------|
| S10A6               | LQDAEIAR             | Yes               | 458.25                 | 802.4                 | 8.02                        | 60.1                     | 31.7                | 9118                            | 5266                      | 4497                      | No                                 |
| S10A7               | No peptide           |                   |                        |                       |                             |                          |                     |                                 |                           |                           |                                    |
| SAA                 | DPNHFRPAGLPEK        | Yes               | 739.38                 | 373.2                 | 9.96                        | 96.4                     | 41                  | 56757                           | ND                        | ND                        | No                                 |
| SAA                 | DPNHFRPAGLPEK        | Yes               | 739.38                 | 464.2                 | 9.96                        | 96.4                     | 44                  | 4421                            | ND                        | ND                        | No                                 |
| SAA                 | DPNHFRPAGLPEK        | Yes               | 739.38                 | 543.3                 | 9.96                        | 96.4                     | 38                  | 2963                            | ND                        | ND                        | No                                 |
| SAA                 | DPNHFRPAGLPEK        | Yes               | 739.38                 | 867.5                 | 9.96                        | 96.4                     | 41                  | 2291                            | ND                        | ND                        | No                                 |
| SAA                 | EANYIGSDK            | Yes               | 498.74                 | 406.2                 | 7.45                        | 65.3                     | 24.4                | 959911                          | ND                        | ND                        | No                                 |
| SAA                 | EANYIGSDK            | Yes               | 498.74                 | 519.3                 | 7.45                        | 65.3                     | 24.4                | 351713                          | ND                        | ND                        | No                                 |
| SAA                 | EANYIGSDK            | Yes               | 498.74                 | 682.3                 | 7.45                        | 65.3                     | 24.4                | 84700                           | ND                        | ND                        | No                                 |
| SAA                 | EANYIGSDK            | Yes               | 498.74                 | 796.4                 | 7.45                        | 65.3                     | 24.4                | 112529                          | ND                        | ND                        | No                                 |
| SAA                 | FFGHGAEDSLADQAANEWGR | Yes               | 1089.49                | 418.2                 | 16.92                       | 141.5                    | 53.4                | 4927                            | ND                        | ND                        | No                                 |
| SAA                 | FFGHGAEDSLADQAANEWGR | Yes               | 1089.49                | 489.2                 | 16.92                       | 141.5                    | 53.4                | 4675                            | ND                        | ND                        | No                                 |
| SAA                 | FFGHGAEDSLADQAANEWGR | Yes               | 1089.49                | 661.3                 | 16.92                       | 141.5                    | 59.4                | ND                              | ND                        | ND                        | No                                 |
| SAA                 | FFGHGAEDSLADQAANEWGR | Yes               | 1089.49                | 931.4                 | 16.92                       | 141.5                    | 56.4                | ND                              | ND                        | ND                        | No                                 |
| SAA                 | SFFSFLGEAFDGAR       | Yes               | 775.87                 | 303.2                 | 24.69                       | 101.1                    | 45.6                | ND                              | 11314                     | ND                        | Yes (Based on<br>Manual<br>Review) |
| SAA                 | SFFSFLGEAFDGAR       | Yes               | 775.87                 | 636.3                 | 24.69                       | 101.1                    | 36.6                | ND                              | ND                        | ND                        | Yes (Based on<br>Manual<br>Review) |
| SAA                 | SFFSFLGEAFDGAR       | Yes               | 775.87                 | 822.4                 | 24.69                       | 101.1                    | 33.6                | 148875                          | 16482                     | ND                        | No                                 |
| SAA                 | SFFSFLGEAFDGAR       | Yes               | 775.87                 | 935.5                 | 24.69                       | 101.1                    | 33.6                | 45584                           | 7530                      | 6834                      | No                                 |
| SCF                 | FSNISEGLSNYSIIDK     | Yes               | 893.95                 | 349.2                 | 17.92                       | 116.3                    | 44.8                | 60571                           | ND                        | ND                        | No                                 |
| SCF                 | FSNISEGLSNYSIIDK     | Yes               | 893.95                 | 375.2                 | 17.92                       | 116.3                    | 38.8                | 24301                           | ND                        | ND                        | No                                 |

**Table S5.** MRM assay of individual proteins.

| Protein<br>(_HUMAN) | Peptide                            | MS/MS<br>spectrum | Precursor ion<br>(m/z) | Fragment ion<br>(m/z) | Retention time<br>(minutes) | Declustering<br>potential | Collision<br>energy | Area of<br>synthetic<br>peptide | Area in control<br>sample | Area in disease<br>sample | Interference |
|---------------------|------------------------------------|-------------------|------------------------|-----------------------|-----------------------------|---------------------------|---------------------|---------------------------------|---------------------------|---------------------------|--------------|
| SCF                 | FSNISEGLSNYSIIDK                   | Yes               | 893.95                 | 462.2                 | 17.92                       | 116.3                     | 38.8                | 17281                           | ND                        | ND                        | No           |
| SCF                 | FSNISEGLSNYSIIDK                   | Yes               | 893.95                 | 939.5                 | 17.92                       | 116.3                     | 41.8                | 16469                           | ND                        | ND                        | No           |
| SCF                 | LFTPEEFFR                          | Yes               | 593.3                  | 261.2                 | 22.31                       | 77.5                      | 28.6                | 73410                           | ND                        | ND                        | No           |
| SCF                 | LFTPEEFFR                          | Yes               | 593.3                  | 362.2                 | 22.31                       | 77.5                      | 25.6                | 48497                           | ND                        | ND                        | No           |
| SCF                 | LFTPEEFFR                          | Yes               | 593.3                  | 824.4                 | 22.31                       | 77.5                      | 28.6                | 81177                           | ND                        | ND                        | No           |
| SCF                 | LFTPEEFFR                          | Yes               | 593.3                  | 925.4                 | 22.31                       | 77.5                      | 28.6                | 28216                           | ND                        | ND                        | No           |
| SCF                 | LVANLPK                            | Yes               | 377.74                 | 357.3                 | 10.46                       | 49.7                      | 28.1                | 145411                          | ND                        | ND                        | No           |
| SCF                 | LVANLPK                            | Yes               | 377.74                 | 471.3                 | 10.46                       | 49.7                      | 19.1                | 54580                           | ND                        | ND                        | No           |
| SCF                 | LVANLPK                            | Yes               | 377.74                 | 542.3                 | 10.46                       | 49.7                      | 19.1                | 1228873                         | ND                        | ND                        | No           |
| SCF                 | LVANLPK                            | Yes               | 377.74                 | 641.4                 | 10.46                       | 49.7                      | 19.1                | 210875                          | ND                        | ND                        | No           |
| SDC1                | DTQLLTAIPTSPEPTGLEATAASTSTLPAGEGPK | No                |                        |                       |                             |                           |                     |                                 |                           |                           |              |
| SDC1                | EGEAVVLPEVEPGLTAR                  | Yes               | 883.47                 | 387.2                 | 17.02                       | 115                       | 41.4                | 51603                           | ND                        | ND                        | No           |
| SDC1                | EGEAVVLPEVEPGLTAR                  | Yes               | 883.47                 | 486.2                 | 17.02                       | 115                       | 41.4                | 82652                           | ND                        | ND                        | No           |
| SDC1                | EGEAVVLPEVEPGLTAR                  | Yes               | 883.47                 | 585.3                 | 17.02                       | 115                       | 38.4                | 105119                          | ND                        | ND                        | No           |
| SDC1                | EGEAVVLPEVEPGLTAR                  | Yes               | 883.47                 | 698.4                 | 17.02                       | 115                       | 38.4                | 125757                          | ND                        | ND                        | No           |
| SDC1                | EQEATPRPR                          | No                |                        |                       |                             |                           |                     |                                 |                           |                           |              |
| SDC1                | ETTQLPTTHLASTTTATTAQEPATSHPHR      | No                |                        |                       |                             |                           |                     |                                 |                           |                           |              |
| SDC1                | QANGGAYQKPTK                       | Yes               | 631.83                 | 345.2                 | 5.43                        | 82.5                      | 33.3                | 15593                           | ND                        | ND                        | No           |
| SDC1                | QANGGAYQKPTK                       | Yes               | 631.83                 | 473.3                 | 5.43                        | 82.5                      | 39.3                | 5862                            | ND                        | ND                        | No           |
| SDC1                | QANGGAYQKPTK                       | Yes               | 631.83                 | 764.4                 | 5.43                        | 82.5                      | 39.3                | 4242                            | ND                        | ND                        | No           |
| SDC1                | QANGGAYQKPTK                       | Yes               | 631.83                 | 949.5                 | 5.43                        | 82.5                      | 30.3                | 2685                            | ND                        | ND                        | No           |
| SEM3G               | DILQLIGFANLPR                      | Yes               | 735.43                 | 570.3                 | 24.69                       | 95.9                      | 34.9                | 13429                           | ND                        | ND                        | No           |
| SEM3G               | DILQLIGFANLPR                      | Yes               | 735.43                 | 583.3                 | 24.69                       | 95.9                      | 31.9                | 26884                           | ND                        | ND                        | No           |

**Table S5.** MRM assay of individual proteins.

| Protein<br>(_HUMAN) | Peptide                  | MS/MS<br>spectrum | Precursor ion<br>(m/z) | Fragment ion<br>(m/z) | Retention time<br>(minutes) | Decustering<br>potential | Collision<br>energy | Area of<br>synthetic<br>peptide | Area in control<br>sample | Area in disease<br>sample | Interference                       |
|---------------------|--------------------------|-------------------|------------------------|-----------------------|-----------------------------|--------------------------|---------------------|---------------------------------|---------------------------|---------------------------|------------------------------------|
| SEM3G               | DILQLIGFANLPR            | Yes               | 735.43                 | 774.4                 | 24.69                       | 95.9                     | 31.9                | 55757                           | ND                        | ND                        | No                                 |
| SEM3G               | DILQLIGFANLPR            | Yes               | 735.43                 | 887.5                 | 24.69                       | 95.9                     | 34.9                | 24186                           | ND                        | ND                        | No                                 |
| SEM3G               | DYPDEVLQFAR              | Yes               | 676.83                 | 521.3                 | 18.18                       | 88.3                     | 35.3                | 73122                           | ND                        | ND                        | No                                 |
| SEM3G               | DYPDEVLQFAR              | Yes               | 676.83                 | 634.4                 | 18.18                       | 88.3                     | 35.3                | 105183                          | ND                        | ND                        | No                                 |
| SEM3G               | DYPDEVLQFAR              | Yes               | 676.83                 | 733.4                 | 18.18                       | 88.3                     | 38.3                | 62824                           | ND                        | ND                        | No                                 |
| SEM3G               | DYPDEVLQFAR              | Yes               | 676.83                 | 977.5                 | 18.18                       | 88.3                     | 41.3                | 60392                           | ND                        | ND                        | No                                 |
| SEM3G               | EVLWPPQPGQR              | Yes               | 653.85                 | 457.3                 | 15.69                       | 85.3                     | 40.3                | 7847                            | ND                        | ND                        | No                                 |
| SEM3G               | EVLWPPQPGQR              | Yes               | 653.85                 | 682.4                 | 15.69                       | 85.3                     | 40.3                | 4405                            | ND                        | ND                        | No                                 |
| SEM3G               | EVLWPPQPGQR              | Yes               | 653.85                 | 779.4                 | 15.69                       | 85.3                     | 31.3                | 23474                           | ND                        | ND                        | No                                 |
| SEM3G               | EVLWPPQPGQR              | Yes               | 653.85                 | 965.5                 | 15.69                       | 85.3                     | 31.3                | 1420                            | ND                        | ND                        | No                                 |
| SEM3G               | LFLGGLDALYSR             | Yes               | 719.41                 | 375.2                 | 24.59                       | 93.8                     | 31.2                | 144365                          | 6636                      | 6922                      | No                                 |
| SEM3G               | LFLGGLDALYSR             | Yes               | 719.41                 | 538.3                 | 24.59                       | 93.8                     | 34.2                | 131258                          | 17970                     | 5471                      | No                                 |
| SEM3G               | LFLGGLDALYSR             | Yes               | 719.41                 | 651.4                 | 24.59                       | 93.8                     | 34.2                | ND                              | ND                        | ND                        | Yes (Based on<br>Manual<br>Review) |
| SEM3G               | LFLGGLDALYSR             | Yes               | 719.41                 | 837.4                 | 24.59                       | 93.8                     | 34.2                | 214355                          | 24277                     | 25910                     | No                                 |
| SEM3G               | VIALQAGGSAEPEEVVLEELQVFK | Yes               | 852.46                 | 294.2                 | 24.59                       | 111                      | 38                  | 20072                           | ND                        | ND                        | No                                 |
| SEM3G               | VIALQAGGSAEPEEVVLEELQVFK | Yes               | 852.46                 | 763.4                 | 24.59                       | 111                      | 38                  | 13805                           | ND                        | ND                        | No                                 |
| SEM3G               | VIALQAGGSAEPEEVVLEELQVFK | Yes               | 852.46                 | 892.5                 | 24.59                       | 111                      | 41                  | 15384                           | ND                        | ND                        | No                                 |
| SEM3G               | VIALQAGGSAEPEEVVLEELQVFK | Yes               | 852.46                 | 997.5                 | 24.59                       | 111                      | 41                  | 12632                           | ND                        | ND                        | No                                 |
| SEPR                | LAYVYQNNIYLK             | Yes               | 751.41                 | 260.2                 | 16.00                       | 97.9                     | 35.6                | 6421                            | ND                        | ND                        | No                                 |
| SEPR                | LAYVYQNNIYLK             | Yes               | 751.41                 | 348.2                 | 16.00                       | 97.9                     | 35.6                | 22566                           | ND                        | ND                        | No                                 |
| SEPR                | LAYVYQNNIYLK             | Yes               | 751.41                 | 423.3                 | 16.00                       | 97.9                     | 35.6                | 5825                            | ND                        | ND                        | No                                 |
| SEPR                | LAYVYQNNIYLK             | Yes               | 751.41                 | 892.5                 | 16.00                       | 97.9                     | 35.6                | 2276                            | ND                        | ND                        | No                                 |

**Table S5.** MRM assay of individual proteins.

| Protein<br>(_HUMAN) | Peptide                    | MS/MS<br>spectrum | Precursor ion<br>(m/z) | Fragment ion<br>(m/z) | Retention time<br>(minutes) | Declustering<br>potential | Collision<br>energy | Area of<br>synthetic<br>peptide | Area in control<br>sample | Area in disease<br>sample | Interference |
|---------------------|----------------------------|-------------------|------------------------|-----------------------|-----------------------------|---------------------------|---------------------|---------------------------------|---------------------------|---------------------------|--------------|
| SEPR                | NVDYLLIHGTADDNVHFQNSAQIAK  | No                |                        |                       |                             |                           |                     |                                 |                           |                           |              |
| SEPR                | QFVYLESYK                  | Yes               | 689.83                 | 397.2                 | 14.91                       | 90                        | 41.9                | 17314                           | ND                        | ND                        | No           |
| SEPR                | QFVYLESYK                  | Yes               | 689.83                 | 599.3                 | 14.91                       | 90                        | 32.9                | 13219                           | ND                        | ND                        | No           |
| SEPR                | QFVYLESYK                  | Yes               | 689.83                 | 728.3                 | 14.91                       | 90                        | 32.9                | 20818                           | ND                        | ND                        | No           |
| SEPR                | QFVYLESYK                  | Yes               | 689.83                 | 841.4                 | 14.91                       | 90                        | 29.9                | 10426                           | ND                        | ND                        | No           |
| SEPR                | SVFAVNWISYLASK             | No                |                        |                       |                             |                           |                     |                                 |                           |                           |              |
| SEPR                | TQEHIIESR                  | Yes               | 564.77                 | 520.2                 | 5.62                        | 73.9                      | 33.3                | 2630                            | ND                        | ND                        | No           |
| SEPR                | TQEHIIESR                  | Yes               | 564.77                 | 633.3                 | 5.62                        | 73.9                      | 36.3                | 3506                            | ND                        | ND                        | No           |
| SEPR                | TQEHIIESR                  | Yes               | 564.77                 | 770.4                 | 5.62                        | 73.9                      | 33.3                | 3068                            | ND                        | ND                        | No           |
| SEPR                | TQEHIIESR                  | Yes               | 564.77                 | 899.4                 | 5.62                        | 73.9                      | 27.3                | 2053                            | ND                        | ND                        | No           |
| SERPH               | AVLSAEQLR                  | Yes               | 493.79                 | 545.3                 | 11.41                       | 64.7                      | 24.2                | 68233                           | ND                        | ND                        | No           |
| SERPH               | AVLSAEQLR                  | Yes               | 493.79                 | 616.3                 | 11.41                       | 64.7                      | 24.2                | 102913                          | ND                        | 1077                      | No           |
| SERPH               | AVLSAEQLR                  | Yes               | 493.79                 | 703.4                 | 11.41                       | 64.7                      | 24.2                | 227242                          | ND                        | ND                        | No           |
| SERPH               | AVLSAEQLR                  | Yes               | 493.79                 | 816.5                 | 11.41                       | 64.7                      | 24.2                | 184073                          | ND                        | ND                        | No           |
| SERPH               | DEEVHAGLGELLR              | Yes               | 479.92                 | 401.3                 | 16.64                       | 62.9                      | 25                  | 118601                          | ND                        | ND                        | No           |
| SERPH               | DEEVHAGLGELLR              | Yes               | 479.92                 | 587.4                 | 16.64                       | 62.9                      | 22                  | 108940                          | ND                        | ND                        | No           |
| SERPH               | DEEVHAGLGELLR              | Yes               | 479.92                 | 757.5                 | 16.64                       | 62.9                      | 31                  | 103628                          | ND                        | ND                        | No           |
| SERPH               | DEEVHAGLGELLR              | Yes               | 479.92                 | 828.5                 | 16.64                       | 62.9                      | 31                  | 108592                          | ND                        | ND                        | No           |
| SERPH               | DQAVENILVSPVVVASSLGLVSLGGK | Yes               | 851.15                 | 374.2                 | 23.92                       | 110.8                     | 47                  | 11523                           | ND                        | 9547                      | No           |
| SERPH               | DQAVENILVSPVVVASSLGLVSLGGK | Yes               | 851.15                 | 657.3                 | 23.92                       | 110.8                     | 47                  | 4351                            | ND                        | 5348                      | No           |
| SERPH               | DQAVENILVSPVVVASSLGLVSLGGK | Yes               | 851.15                 | 673.4                 | 23.92                       | 110.8                     | 41                  | 5133                            | ND                        | 7478                      | No           |
| SERPH               | DQAVENILVSPVVVASSLGLVSLGGK | Yes               | 851.15                 | 730.4                 | 23.92                       | 110.8                     | 44                  | 13071                           | ND                        | 6341                      | No           |
| SERPH               | DTQSGSLLFIGR               | Yes               | 647.34                 | 492.3                 | 17.85                       | 84.5                      | 31                  | 97460                           | ND                        | ND                        | No           |

**Table S5.** MRM assay of individual proteins.

| Protein<br>(_HUMAN) | Peptide               | MS/MS<br>spectrum | Precursor ion<br>(m/z) | Fragment ion<br>(m/z) | Retention time<br>(minutes) | Declustering<br>potential | Collision<br>energy | Area of<br>synthetic<br>peptide | Area in control<br>sample | Area in disease<br>sample | Interference                       |
|---------------------|-----------------------|-------------------|------------------------|-----------------------|-----------------------------|---------------------------|---------------------|---------------------------------|---------------------------|---------------------------|------------------------------------|
| SERPH               | DTQSGSLLFIGR          | Yes               | 647.34                 | 605.4                 | 17.85                       | 84.5                      | 34                  | 66640                           | ND                        | ND                        | No                                 |
| SERPH               | DTQSGSLLFIGR          | Yes               | 647.34                 | 805.5                 | 17.85                       | 84.5                      | 34                  | 30443                           | ND                        | ND                        | No                                 |
| SERPH               | DTQSGSLLFIGR          | Yes               | 647.34                 | 862.5                 | 17.85                       | 84.5                      | 40                  | 54942                           | ND                        | ND                        | No                                 |
| SERPH               | GVVEVTHDLQK           | Yes               | 408.89                 | 503.3                 | 10.37                       | 53.7                      | 21.4                | 15922                           | ND                        | ND                        | No                                 |
| SERPH               | GVVEVTHDLQK           | Yes               | 408.89                 | 640.3                 | 10.37                       | 53.7                      | 21.4                | 21168                           | ND                        | ND                        | No                                 |
| SERPH               | GVVEVTHDLQK           | Yes               | 408.89                 | 741.4                 | 10.37                       | 53.7                      | 21.4                | 30420                           | ND                        | ND                        | No                                 |
| SERPH               | GVVEVTHDLQK           | Yes               | 408.89                 | 840.5                 | 10.37                       | 53.7                      | 27.4                | 4748                            | ND                        | ND                        | No                                 |
| SFPA2               | GPPGLPAHLDEELQATLHDFR | Yes               | 771.73                 | 322.2                 | 23.25                       | 100.6                     | 39.9                | 57460                           | ND                        | ND                        | No                                 |
| SFPA2               | GPPGLPAHLDEELQATLHDFR | Yes               | 771.73                 | 422.2                 | 23.25                       | 100.6                     | 36.9                | 37974                           | ND                        | ND                        | No                                 |
| SFPA2               | GPPGLPAHLDEELQATLHDFR | Yes               | 771.73                 | 574.3                 | 23.25                       | 100.6                     | 36.9                | 15512                           | ND                        | ND                        | No                                 |
| SFPA2               | GPPGLPAHLDEELQATLHDFR | Yes               | 771.73                 | 859.4                 | 23.25                       | 100.6                     | 42.9                | 19392                           | ND                        | ND                        | No                                 |
| SFPA2               | HQILQTR               | Yes               | 448.26                 | 266.1                 | 7.08                        | 58.8                      | 25.2                | 34686                           | 1288                      | 2524                      | No                                 |
| SFPA2               | HQILQTR               | Yes               | 448.26                 | 517.3                 | 7.08                        | 58.8                      | 25.2                | 11846                           | ND                        | ND                        | No                                 |
| SFPA2               | HQILQTR               | Yes               | 448.26                 | 630.4                 | 7.08                        | 58.8                      | 25.2                | 31337                           | 1284                      | 4356                      | No                                 |
| SFPA2               | HQILQTR               | Yes               | 448.26                 | 758.5                 | 7.08                        | 58.8                      | 25.2                | ND                              | 1989                      | 3294                      | Yes (Based on<br>Manual<br>Review) |
| SFPA2               | YSDGTPVNYTNWYR        | Yes               | 868.39                 | 338.2                 | 16.13                       | 113                       | 43.7                | 11969                           | ND                        | ND                        | No                                 |
| SFPA2               | YSDGTPVNYTNWYR        | Yes               | 868.39                 | 366.1                 | 16.13                       | 113                       | 40.7                | 7192                            | ND                        | ND                        | No                                 |
| SFPA2               | YSDGTPVNYTNWYR        | Yes               | 868.39                 | 739.4                 | 16.13                       | 113                       | 40.7                | 12602                           | ND                        | ND                        | No                                 |
| SFPA2               | YSDGTPVNYTNWYR        | Yes               | 868.39                 | 902.4                 | 16.13                       | 113                       | 37.7                | 5659                            | ND                        | ND                        | No                                 |
| SFTA1               | GPPGLPAHLDEELQATLHDFR | Yes               | 771.73                 | 322.2                 | 23.25                       | 100.6                     | 39.9                | 57460                           | ND                        | ND                        | No                                 |
| SFTA1               | GPPGLPAHLDEELQATLHDFR | Yes               | 771.73                 | 422.2                 | 23.25                       | 100.6                     | 36.9                | 37974                           | ND                        | ND                        | No                                 |
| SFTA1               | GPPGLPAHLDEELQATLHDFR | Yes               | 771.73                 | 574.3                 | 23.25                       | 100.6                     | 36.9                | 15512                           | ND                        | ND                        | No                                 |

**Table S5.** MRM assay of individual proteins.

| Protein<br>(_HUMAN) | Peptide               | MS/MS<br>spectrum | Precursor ion<br>(m/z) | Fragment ion<br>(m/z) | Retention time<br>(minutes) | Declustering<br>potential | Collision<br>energy | Area of<br>synthetic<br>peptide | Area in control<br>sample | Area in disease<br>sample | Interference                       |
|---------------------|-----------------------|-------------------|------------------------|-----------------------|-----------------------------|---------------------------|---------------------|---------------------------------|---------------------------|---------------------------|------------------------------------|
| SFTA1               | GPPGLPAHLDEELQATLHDFR | Yes               | 771.73                 | 859.4                 | 23.25                       | 100.6                     | 42.9                | 19392                           | ND                        | ND                        | No                                 |
| SFTA1               | HQILQTR               | Yes               | 448.26                 | 266.1                 | 7.08                        | 58.8                      | 25.2                | 34686                           | 1288                      | 2524                      | No                                 |
| SFTA1               | HQILQTR               | Yes               | 448.26                 | 517.3                 | 7.08                        | 58.8                      | 25.2                | 11846                           | ND                        | ND                        | No                                 |
| SFTA1               | HQILQTR               | Yes               | 448.26                 | 630.4                 | 7.08                        | 58.8                      | 25.2                | 31337                           | 1284                      | 4356                      | No                                 |
| SFTA1               | HQILQTR               | Yes               | 448.26                 | 758.5                 | 7.08                        | 58.8                      | 25.2                | ND                              | 1989                      | 3294                      | Yes (Based on<br>Manual<br>Review) |
| SFTA1               | YSDGTPVNYTNWYR        | Yes               | 868.39                 | 338.2                 | 16.13                       | 113                       | 43.7                | 11969                           | ND                        | ND                        | No                                 |
| SFTA1               | YSDGTPVNYTNWYR        | Yes               | 868.39                 | 366.1                 | 16.13                       | 113                       | 40.7                | 7192                            | ND                        | ND                        | No                                 |
| SFTA1               | YSDGTPVNYTNWYR        | Yes               | 868.39                 | 739.4                 | 16.13                       | 113                       | 40.7                | 12602                           | ND                        | ND                        | No                                 |
| SFTA1               | YSDGTPVNYTNWYR        | Yes               | 868.39                 | 902.4                 | 16.13                       | 113                       | 37.7                | 5659                            | ND                        | ND                        | No                                 |
| SG3A2               | VPLPVDK               | Yes               | 384.24                 | 262.1                 | 9.63                        | 50.6                      | 28.4                | 275093                          | ND                        | ND                        | No                                 |
| SG3A2               | VPLPVDK               | Yes               | 384.24                 | 458.3                 | 9.63                        | 50.6                      | 25.4                | 501455                          | ND                        | ND                        | No                                 |
| SG3A2               | VPLPVDK               | Yes               | 384.24                 | 571.3                 | 9.63                        | 50.6                      | 19.4                | 76171                           | ND                        | ND                        | No                                 |
| SG3A2               | VPLPVDK               | Yes               | 384.24                 | 668.4                 | 9.63                        | 50.6                      | 19.4                | 87385                           | ND                        | ND                        | No                                 |
| SGPL1               | AGYPLEHPDFDR          | No                |                        |                       |                             |                           |                     |                                 |                           |                           |                                    |
| SGPL1               | ALPSQGLSSSAVLEK       | Yes               | 743.91                 | 389.2                 | 13.29                       | 97                        | 44.2                | 49971                           | ND                        | ND                        | No                                 |
| SGPL1               | ALPSQGLSSSAVLEK       | Yes               | 743.91                 | 820.4                 | 13.29                       | 97                        | 44.2                | 63025                           | ND                        | ND                        | No                                 |
| SGPL1               | ALPSQGLSSSAVLEK       | Yes               | 743.91                 | 933.5                 | 13.29                       | 97                        | 44.2                | 8920                            | ND                        | ND                        | No                                 |
| SGPL1               | ALPSQGLSSSAVLEK       | Yes               | 743.91                 | 990.5                 | 13.29                       | 97                        | 35.2                | 19727                           | ND                        | ND                        | No                                 |
| SGPL1               | DFDIYR                | No                |                        |                       |                             |                           |                     |                                 |                           |                           |                                    |
| SGPL1               | GIFVFGNPQLSVIALGSR    | No                |                        |                       |                             |                           |                     |                                 |                           |                           |                                    |
| SGPL1               | TPEIVAPQSAHAAFNK      | Yes               | 560.96                 | 328.2                 | 11.69                       | 73.4                      | 26.2                | 149023                          | ND                        | ND                        | No                                 |
| SGPL1               | TPEIVAPQSAHAAFNK      | Yes               | 560.96                 | 441.2                 | 11.69                       | 73.4                      | 26.2                | 72289                           | ND                        | ND                        | No                                 |

**Table S5.** MRM assay of individual proteins.

| Protein<br>(_HUMAN) | Peptide                    | MS/MS<br>spectrum | Precursor ion<br>(m/z) | Fragment ion<br>(m/z) | Retention time<br>(minutes) | Declustering<br>potential | Collision<br>energy | Area of<br>synthetic<br>peptide | Area in control<br>sample | Area in disease<br>sample | Interference |
|---------------------|----------------------------|-------------------|------------------------|-----------------------|-----------------------------|---------------------------|---------------------|---------------------------------|---------------------------|---------------------------|--------------|
| SGPL1               | TPEIVAPQSAHAAFNK           | Yes               | 560.96                 | 687.4                 | 11.69                       | 73.4                      | 32.2                | 37928                           | ND                        | ND                        | No           |
| SGPL1               | TPEIVAPQSAHAAFNK           | Yes               | 560.96                 | 845.4                 | 11.69                       | 73.4                      | 35.2                | 35212                           | ND                        | ND                        | No           |
| SIAL                | AYEDEYSYFK                 | Yes               | 657.78                 | 544.3                 | 14.00                       | 85.9                      | 40.4                | 102772                          | ND                        | ND                        | No           |
| SIAL                | AYEDEYSYFK                 | Yes               | 657.78                 | 707.3                 | 14.00                       | 85.9                      | 31.4                | 58308                           | ND                        | ND                        | No           |
| SIAL                | AYEDEYSYFK                 | Yes               | 657.78                 | 836.4                 | 14.00                       | 85.9                      | 31.4                | 49778                           | ND                        | ND                        | No           |
| SIAL                | AYEDEYSYFK                 | Yes               | 657.78                 | 951.4                 | 14.00                       | 85.9                      | 31.4                | 131440                          | ND                        | ND                        | No           |
| SIAL                | GQGYDGYDGQNYHHQ            | Yes               | 951.38                 | 284.1                 | 9.57                        | 123.7                     | 50.4                | ND                              | ND                        | ND                        | No           |
| SIAL                | GQGYDGYDGQNYHHQ            | Yes               | 951.38                 | 421.2                 | 9.57                        | 123.7                     | 47.4                | ND                              | ND                        | ND                        | No           |
| SIAL                | GQGYDGYDGQNYHHQ            | Yes               | 951.38                 | 584.3                 | 9.57                        | 123.7                     | 53.4                | ND                              | ND                        | ND                        | No           |
| SIAL                | GQGYDGYDGQNYHHQ            | Yes               | 951.38                 | 861.4                 | 9.57                        | 123.7                     | 47.4                | ND                              | ND                        | ND                        | No           |
| SIAL                | IEDSEENGVFK                | Yes               | 633.8                  | 358.2                 | 10.57                       | 82.8                      | 30.4                | 35270                           | ND                        | ND                        | No           |
| SIAL                | IEDSEENGVFK                | Yes               | 633.8                  | 693.4                 | 10.57                       | 82.8                      | 27.4                | 12215                           | ND                        | ND                        | No           |
| SIAL                | IEDSEENGVFK                | Yes               | 633.8                  | 822.4                 | 10.57                       | 82.8                      | 30.4                | 9168                            | ND                        | ND                        | No           |
| SIAL                | IEDSEENGVFK                | Yes               | 633.8                  | 874.3                 | 10.57                       | 82.8                      | 30.4                | 3520                            | ND                        | ND                        | No           |
| SIAL                | TTSPPF GK                  | Yes               | 417.72                 | 387.2                 | 8.48                        | 54.9                      | 20.9                | 44759                           | ND                        | ND                        | No           |
| SIAL                | TTSPPF GK                  | Yes               | 417.72                 | 448.3                 | 8.48                        | 54.9                      | 26.9                | 246252                          | ND                        | ND                        | No           |
| SIAL                | TTSPPF GK                  | Yes               | 417.72                 | 545.3                 | 8.48                        | 54.9                      | 20.9                | 299686                          | ND                        | ND                        | No           |
| SIAL                | TTSPPF GK                  | Yes               | 417.72                 | 632.3                 | 8.48                        | 54.9                      | 20.9                | 547713                          | ND                        | ND                        | No           |
| SIAL                | TTTSPNGGF EPTTPPQVYR       | Yes               | 1025.5                 | 338.2                 | 12.99                       | 133.3                     | 44.6                | 6244                            | ND                        | ND                        | No           |
| SIAL                | TTTSPNGGF EPTTPPQVYR       | Yes               | 1025.5                 | 602.3                 | 12.99                       | 133.3                     | 56.6                | 7636                            | ND                        | ND                        | No           |
| SIAL                | TTTSPNGGF EPTTPPQVYR       | Yes               | 1025.5                 | 759.4                 | 12.99                       | 133.3                     | 47.6                | 20935                           | ND                        | ND                        | No           |
| SIAL                | TTTSPNGGF EPTTPPQVYR       | Yes               | 1025.5                 | 992.4                 | 12.99                       | 133.3                     | 47.6                | 3002                            | ND                        | ND                        | No           |
| SLPI                | SSGLFPFLVLLALGTLAPWAVEGSGK | No                |                        |                       |                             |                           |                     |                                 |                           |                           |              |



**Table S5.** MRM assay of individual proteins.

| Protein<br>(_HUMAN) | Peptide                    | MS/MS<br>spectrum | Precursor ion<br>(m/z) | Fragment ion<br>(m/z) | Retention time<br>(minutes) | Decustering<br>potential | Collision<br>energy | Area of<br>synthetic<br>peptide | Area in control<br>sample | Area in disease<br>sample | Interference |
|---------------------|----------------------------|-------------------|------------------------|-----------------------|-----------------------------|--------------------------|---------------------|---------------------------------|---------------------------|---------------------------|--------------|
| SMD3                | NQGSGAGR                   | No                |                        |                       |                             |                          |                     |                                 |                           |                           |              |
| SMD3                | VAQLEQVYIR                 | No                |                        |                       |                             |                          |                     |                                 |                           |                           |              |
| SMS                 | NFFWK                      | Yes               | 371.19                 | 333.2                 | 17.26                       | 48.9                     | 18.8                | 27733                           | 4228                      | 8383                      | No           |
| SMS                 | NFFWK                      | Yes               | 371.19                 | 409.2                 | 17.26                       | 48.9                     | 18.8                | 8846                            | ND                        | ND                        | No           |
| SMS                 | NFFWK                      | Yes               | 371.19                 | 480.3                 | 17.26                       | 48.9                     | 18.8                | 116706                          | 16729                     | 10016                     | No           |
| SMS                 | NFFWK                      | Yes               | 371.19                 | 627.3                 | 17.26                       | 48.9                     | 18.8                | 21709                           | 10288                     | 4234                      | No           |
| SODM                | AIWNVINWENVTER             | No                |                        |                       |                             |                          |                     |                                 |                           |                           |              |
| SODM                | FNGGGHINHSIFWTNLSPNGGGEPEK | Yes               | 879.76                 | 433.2                 | 16.74                       | 114.5                    | 51.4                | 1171                            | ND                        | ND                        | No           |
| SODM                | FNGGGHINHSIFWTNLSPNGGGEPEK | Yes               | 879.76                 | 544.3                 | 16.74                       | 114.5                    | 45.4                | 2358                            | ND                        | ND                        | No           |
| SODM                | FNGGGHINHSIFWTNLSPNGGGEPEK | Yes               | 879.76                 | 755.4                 | 16.74                       | 114.5                    | 39.4                | 3251                            | ND                        | ND                        | No           |
| SODM                | FNGGGHINHSIFWTNLSPNGGGEPEK | Yes               | 879.76                 | 842.4                 | 16.74                       | 114.5                    | 42.4                | 4754                            | ND                        | ND                        | No           |
| SODM                | GDVTAQIALQPALK             | Yes               | 712.91                 | 428.3                 | 15.00                       | 93                       | 33.9                | 81532                           | 7739                      | 2940                      | No           |
| SODM                | GDVTAQIALQPALK             | Yes               | 712.91                 | 669.4                 | 15.00                       | 93                       | 33.9                | 23355                           | 5523                      | 1834                      | No           |
| SODM                | GDVTAQIALQPALK             | Yes               | 712.91                 | 740.5                 | 15.00                       | 93                       | 33.9                | 58585                           | 8465                      | 7802                      | No           |
| SODM                | GDVTAQIALQPALK             | Yes               | 712.91                 | 853.6                 | 15.00                       | 93                       | 33.9                | 28422                           | 1075                      | 1361                      | No           |
| SODM                | LTAASVGVQSGSGWGLGFNK       | No                |                        |                       |                             |                          |                     |                                 |                           |                           |              |
| SODM                | NVRPDYLYK                  | Yes               | 335.52                 | 260.2                 | 8.57                        | 44.3                     | 17.7                | 70512                           | ND                        | 6466                      | No           |
| SODM                | NVRPDYLYK                  | Yes               | 335.52                 | 423.3                 | 8.57                        | 44.3                     | 17.7                | 44798                           | ND                        | 3806                      | No           |
| SODM                | NVRPDYLYK                  | Yes               | 335.52                 | 538.3                 | 8.57                        | 44.3                     | 23.7                | 36248                           | ND                        | 1726                      | No           |
| SODM                | NVRPDYLYK                  | Yes               | 335.52                 | 635.3                 | 8.57                        | 44.3                     | 11.7                | 15838                           | ND                        | ND                        | No           |
| SORL                | ENQEVILEEVR                | Yes               | 679.352                | 532.273               | 13.43                       | 100                      | 29.4                | ND                              | 13820                     | 11459                     | No           |
| SORL                | ENQEVILEEVR                | Yes               | 679.352                | 645.4                 | 13.43                       | 100                      | 35.4                | ND                              | ND                        | 8233                      | No           |
| SORL                | ENQEVILEEVR                | Yes               | 679.352                | 758.4                 | 13.43                       | 100                      | 35.4                | ND                              | 11793                     | 3221                      | No           |

**Table S5.** MRM assay of individual proteins.

| Protein<br>(_HUMAN) | Peptide                 | MS/MS<br>spectrum | Precursor ion<br>(m/z) | Fragment ion<br>(m/z) | Retention time<br>(minutes) | Decustering<br>potential | Collision<br>energy | Area of<br>synthetic<br>peptide | Area in control<br>sample | Area in disease<br>sample | Interference |
|---------------------|-------------------------|-------------------|------------------------|-----------------------|-----------------------------|--------------------------|---------------------|---------------------------------|---------------------------|---------------------------|--------------|
| SORL                | ENQEVILEEVR             | Yes               | 679.352                | 857.51                | 13.43                       | 100                      | 38.4                | ND                              | 8544                      | 7627                      | No           |
| SORL                | ESAPGLIATGSVGK          | Yes               | 700.4                  | 556.8                 | 17.40                       | 100                      | 36.3                | ND                              | ND                        | ND                        | No           |
| SORL                | ESAPGLIATGSVGK          | Yes               | 700.4                  | 619.3                 | 17.40                       | 100                      | 36.3                | ND                              | ND                        | ND                        | No           |
| SORL                | ESAPGLIATGSVGK          | Yes               | 700.4                  | 732.4                 | 17.40                       | 100                      | 36.3                | ND                              | ND                        | ND                        | No           |
| SORL                | ESAPGLIATGSVGK          | Yes               | 700.4                  | 845.5                 | 17.40                       | 100                      | 36.3                | ND                              | ND                        | ND                        | No           |
| SORL                | LHGGSAPLPQDR            | Yes               | 416.6                  | 258.1                 | 7.27                        | 100                      | 21.7                | ND                              | ND                        | ND                        | No           |
| SORL                | LHGGSAPLPQDR            | Yes               | 416.6                  | 515.3                 | 7.27                        | 100                      | 21.7                | ND                              | ND                        | ND                        | No           |
| SORL                | LHGGSAPLPQDR            | Yes               | 416.6                  | 523.3                 | 7.27                        | 100                      | 21.7                | ND                              | ND                        | ND                        | No           |
| SORL                | LHGGSAPLPQDR            | Yes               | 416.6                  | 733.4                 | 7.27                        | 100                      | 21.7                | ND                              | ND                        | ND                        | No           |
| SORL                | LHGGSAPLPQDR            | Yes               | 624.329                | 251.151               | 7.27                        | 100                      | 36                  | ND                              | 85623                     | 147821                    | No           |
| SORL                | LHGGSAPLPQDR            | Yes               | 624.329                | 567.8                 | 7.27                        | 100                      | 33                  | ND                              | ND                        | ND                        | No           |
| SORL                | LHGGSAPLPQDR            | Yes               | 624.329                | 725.4                 | 7.27                        | 100                      | 33                  | ND                              | ND                        | ND                        | No           |
| SORL                | LHGGSAPLPQDR            | Yes               | 624.329                | 997.507               | 7.27                        | 100                      | 36                  | ND                              | 14853                     | 23090                     | No           |
| SPB3                | GLVLSGVLHK              | Yes               | 341.55                 | 284.2                 | 14.72                       | 45.1                     | 24                  | 192929                          | ND                        | ND                        | No           |
| SPB3                | GLVLSGVLHK              | Yes               | 341.55                 | 553.3                 | 14.72                       | 45.1                     | 18                  | 62664                           | ND                        | ND                        | No           |
| SPB3                | GLVLSGVLHK              | Yes               | 341.55                 | 640.4                 | 14.72                       | 45.1                     | 15                  | 204170                          | ND                        | ND                        | No           |
| SPB3                | GLVLSGVLHK              | Yes               | 341.55                 | 753.5                 | 14.72                       | 45.1                     | 24                  | ND                              | ND                        | ND                        | No           |
| SPB3                | NLIPEGNIGSNTTLVLVNAIYFK | No                |                        |                       |                             |                          |                     |                                 |                           |                           |              |
| SPB3                | QYTSFHFASLEDVQAK        | Yes               | 624.3                  | 346.2                 | 17.05                       | 81.5                     | 38.4                | 8551                            | ND                        | ND                        | No           |
| SPB3                | QYTSFHFASLEDVQAK        | Yes               | 624.3                  | 445.3                 | 17.05                       | 81.5                     | 38.4                | 16391                           | ND                        | ND                        | No           |
| SPB3                | QYTSFHFASLEDVQAK        | Yes               | 624.3                  | 560.3                 | 17.05                       | 81.5                     | 29.4                | 9678                            | ND                        | ND                        | No           |
| SPB3                | QYTSFHFASLEDVQAK        | Yes               | 624.3                  | 689.3                 | 17.05                       | 81.5                     | 29.4                | 13037                           | ND                        | ND                        | No           |
| SPB3                | VDLHLPR                 | Yes               | 283.84                 | 385.3                 | 12.13                       | 37.6                     | 18                  | ND                              | ND                        | ND                        | No           |

**Table S5.** MRM assay of individual proteins.

| Protein<br>(_HUMAN) | Peptide                | MS/MS<br>spectrum | Precursor ion<br>(m/z) | Fragment ion<br>(m/z) | Retention time<br>(minutes) | Declustering<br>potential | Collision<br>energy | Area of<br>synthetic<br>peptide | Area in control<br>sample | Area in disease<br>sample | Interference |
|---------------------|------------------------|-------------------|------------------------|-----------------------|-----------------------------|---------------------------|---------------------|---------------------------------|---------------------------|---------------------------|--------------|
| SPB3                | VDLHLPR                | Yes               | 283.84                 | 465.2                 | 12.13                       | 37.6                      | 12                  | 4124                            | ND                        | ND                        | No           |
| SPB3                | VDLHLPR                | Yes               | 283.84                 | 522.3                 | 12.13                       | 37.6                      | 18                  | 35766                           | ND                        | ND                        | No           |
| SPB3                | VDLHLPR                | Yes               | 283.84                 | 635.4                 | 12.13                       | 37.6                      | 12                  | ND                              | ND                        | ND                        | No           |
| SPB3                | VLEIPYK                | Yes               | 431.26                 | 407.2                 | 13.67                       | 56.6                      | 30.5                | 590572                          | 4254                      | 3421                      | No           |
| SPB3                | VLEIPYK                | Yes               | 431.26                 | 520.3                 | 13.67                       | 56.6                      | 21.5                | 75406                           | ND                        | ND                        | No           |
| SPB3                | VLEIPYK                | Yes               | 431.26                 | 649.4                 | 13.67                       | 56.6                      | 21.5                | 369423                          | ND                        | ND                        | No           |
| SPB3                | VLEIPYK                | Yes               | 431.26                 | 762.4                 | 13.67                       | 56.6                      | 21.5                | 96046                           | ND                        | ND                        | No           |
| SPB5                | DELNADHPFIYIIR         | Yes               | 572.63                 | 358.2                 | 19.89                       | 74.9                      | 23.8                | 24816                           | ND                        | ND                        | No           |
| SPB5                | DELNADHPFIYIIR         | Yes               | 572.63                 | 401.3                 | 19.89                       | 74.9                      | 35.8                | 13409                           | ND                        | ND                        | No           |
| SPB5                | DELNADHPFIYIIR         | Yes               | 572.63                 | 795.3                 | 19.89                       | 74.9                      | 23.8                | 2662                            | ND                        | ND                        | No           |
| SPB5                | DELNADHPFIYIIR         | Yes               | 572.63                 | 921.6                 | 19.89                       | 74.9                      | 35.8                | 49769                           | ND                        | ND                        | No           |
| SPB5                | DLTDGHEFENILADNSVNDQTK | No                |                        |                       |                             |                           |                     |                                 |                           |                           |              |
| SPB5                | DVEDESTGLEK            | Yes               | 611.28                 | 446.3                 | 8.45                        | 79.9                      | 38.4                | 64116                           | ND                        | ND                        | No           |
| SPB5                | DVEDESTGLEK            | Yes               | 611.28                 | 547.3                 | 8.45                        | 79.9                      | 38.4                | 37035                           | ND                        | ND                        | No           |
| SPB5                | DVEDESTGLEK            | Yes               | 611.28                 | 763.4                 | 8.45                        | 79.9                      | 29.4                | 49081                           | ND                        | ND                        | No           |
| SPB5                | DVEDESTGLEK            | Yes               | 611.28                 | 878.4                 | 8.45                        | 79.9                      | 29.4                | 85051                           | ND                        | ND                        | No           |
| SPB5                | DVPFGFQTVTSDVNK        | Yes               | 827.41                 | 261.2                 | 17.80                       | 107.7                     | 47.9                | 74574                           | ND                        | 5664                      | No           |
| SPB5                | DVPFGFQTVTSDVNK        | Yes               | 827.41                 | 360.2                 | 17.80                       | 107.7                     | 44.9                | 38625                           | ND                        | 2681                      | No           |
| SPB5                | DVPFGFQTVTSDVNK        | Yes               | 827.41                 | 762.4                 | 17.80                       | 107.7                     | 44.9                | 24254                           | ND                        | 3051                      | No           |
| SPB5                | DVPFGFQTVTSDVNK        | Yes               | 827.41                 | 863.4                 | 17.80                       | 107.7                     | 44.9                | 40087                           | ND                        | 5728                      | No           |
| SPB5                | ILVVNAAYFVGK           | No                |                        |                       |                             |                           |                     |                                 |                           |                           |              |
| SPON2               | AFIPPAPVLPSR           | Yes               | 632.87                 | 571.4                 | 15.59                       | 82.6                      | 27.3                | 1733                            | ND                        | ND                        | No           |
| SPON2               | AFIPPAPVLPSR           | Yes               | 632.87                 | 668.4                 | 15.59                       | 82.6                      | 27.3                | 3393                            | ND                        | ND                        | No           |

**Table S5.** MRM assay of individual proteins.

| Protein<br>(_HUMAN) | Peptide      | MS/MS<br>spectrum | Precursor ion<br>(m/z) | Fragment ion<br>(m/z) | Retention time<br>(minutes) | Declustering<br>potential | Collision<br>energy | Area of<br>synthetic<br>peptide | Area in control<br>sample | Area in disease<br>sample | Interference                           |
|---------------------|--------------|-------------------|------------------------|-----------------------|-----------------------------|---------------------------|---------------------|---------------------------------|---------------------------|---------------------------|----------------------------------------|
| SPON2               | AFIPPAPVLPSR | Yes               | 632.87                 | 836.5                 | 15.59                       | 82.6                      | 33.3                | 4536                            | ND                        | ND                        | No                                     |
| SPON2               | AFIPPAPVLPSR | Yes               | 632.87                 | 933.6                 | 15.59                       | 82.6                      | 30.3                | 4096                            | ND                        | ND                        | No                                     |
| SPON2               | ALPIIAR      | No                |                        |                       |                             |                           |                     |                                 |                           |                           |                                        |
| SPON2               | WSQTAFPK     | Yes               | 482.75                 | 391.2                 | 11.79                       | 63.3                      | 32.7                | 107595                          | ND                        | ND                        | No                                     |
| SPON2               | WSQTAFPK     | Yes               | 482.75                 | 563.3                 | 11.79                       | 63.3                      | 23.7                | 88376                           | ND                        | ND                        | No                                     |
| SPON2               | WSQTAFPK     | Yes               | 482.75                 | 691.4                 | 11.79                       | 63.3                      | 23.7                | 81074                           | ND                        | ND                        | No                                     |
| SPON2               | WSQTAFPK     | Yes               | 482.75                 | 778.4                 | 11.79                       | 63.3                      | 23.7                | 133951                          | ND                        | ND                        | No                                     |
| SPON2               | YSITFTGK     | Yes               | 458.74                 | 251.1                 | 12.91                       | 60.2                      | 22.7                | 1267465                         | ND                        | ND                        | No                                     |
| SPON2               | YSITFTGK     | Yes               | 458.74                 | 553.3                 | 12.91                       | 60.2                      | 22.7                | 796157                          | 10847                     | 7398                      | No                                     |
| SPON2               | YSITFTGK     | Yes               | 458.74                 | 666.4                 | 12.91                       | 60.2                      | 22.7                | 857802                          | 8054                      | 4641                      | No                                     |
| SPON2               | YSITFTGK     | Yes               | 458.74                 | 753.4                 | 12.91                       | 60.2                      | 22.7                | 651450                          | 40124                     | 55070                     | Yes (Based on<br>Transition<br>Ratios) |
| SPRC                | DEDNNLLTEK   | Yes               | 595.78                 | 377.2                 | 10.66                       | 77.9                      | 28.7                | 74665                           | ND                        | 965                       | No                                     |
| SPRC                | DEDNNLLTEK   | Yes               | 595.78                 | 490.3                 | 10.66                       | 77.9                      | 25.7                | 31424                           | ND                        | ND                        | No                                     |
| SPRC                | DEDNNLLTEK   | Yes               | 595.78                 | 717.4                 | 10.66                       | 77.9                      | 37.7                | 9062                            | ND                        | ND                        | No                                     |
| SPRC                | DEDNNLLTEK   | Yes               | 595.78                 | 946.5                 | 10.66                       | 77.9                      | 28.7                | 20671                           | ND                        | ND                        | No                                     |
| SPRC                | NVLVTLYER    | Yes               | 369.55                 | 304.2                 | 16.24                       | 48.7                      | 13.4                | 4899                            | ND                        | ND                        | No                                     |
| SPRC                | NVLVTLYER    | Yes               | 369.55                 | 327.2                 | 16.24                       | 48.7                      | 22.4                | 2525                            | ND                        | ND                        | No                                     |
| SPRC                | NVLVTLYER    | Yes               | 369.55                 | 467.2                 | 16.24                       | 48.7                      | 16.4                | 25054                           | ND                        | ND                        | No                                     |
| SPRC                | NVLVTLYER    | Yes               | 369.55                 | 580.3                 | 16.24                       | 48.7                      | 25.4                | 3220                            | ND                        | ND                        | No                                     |
| SRC                 | EVLDQVER     | Yes               | 494.26                 | 403.2                 | 9.60                        | 64.8                      | 24.2                | 67838                           | ND                        | ND                        | No                                     |
| SRC                 | EVLDQVER     | Yes               | 494.26                 | 531.3                 | 9.60                        | 64.8                      | 33.2                | 99156                           | ND                        | ND                        | No                                     |
| SRC                 | EVLDQVER     | Yes               | 494.26                 | 646.3                 | 9.60                        | 64.8                      | 24.2                | 95990                           | ND                        | ND                        | No                                     |

**Table S5.** MRM assay of individual proteins.

| Protein<br>(_HUMAN) | Peptide                      | MS/MS<br>spectrum | Precursor ion<br>(m/z) | Fragment ion<br>(m/z) | Retention time<br>(minutes) | Decustering<br>potential | Collision<br>energy | Area of<br>synthetic<br>peptide | Area in control<br>sample | Area in disease<br>sample | Interference |
|---------------------|------------------------------|-------------------|------------------------|-----------------------|-----------------------------|--------------------------|---------------------|---------------------------------|---------------------------|---------------------------|--------------|
| SRC                 | EVLQDQVER                    | Yes               | 494.26                 | 759.4                 | 9.60                        | 64.8                     | 24.2                | 103615                          | ND                        | ND                        | No           |
| SRC                 | GPSAAFAPAAAEPK               | Yes               | 642.83                 | 683.4                 | 10.86                       | 83.9                     | 30.8                | 275364                          | ND                        | ND                        | No           |
| SRC                 | GPSAAFAPAAAEPK               | Yes               | 642.83                 | 754.4                 | 10.86                       | 83.9                     | 30.8                | 174979                          | ND                        | ND                        | No           |
| SRC                 | GPSAAFAPAAAEPK               | Yes               | 642.83                 | 901.5                 | 10.86                       | 83.9                     | 30.8                | 101520                          | ND                        | ND                        | No           |
| SRC                 | GPSAAFAPAAAEPK               | Yes               | 642.83                 | 972.5                 | 10.86                       | 83.9                     | 30.8                | 67505                           | ND                        | ND                        | No           |
| SRC                 | LFGGFNSSDVTSPQR              | Yes               | 856.92                 | 400.2                 | 14.88                       | 111.5                    | 40.2                | 256788                          | 3693                      | ND                        | No           |
| SRC                 | LFGGFNSSDVTSPQR              | Yes               | 856.92                 | 487.3                 | 14.88                       | 111.5                    | 43.2                | 188542                          | 6824                      | ND                        | No           |
| SRC                 | LFGGFNSSDVTSPQR              | Yes               | 856.92                 | 588.3                 | 14.88                       | 111.5                    | 43.2                | 228174                          | 2986                      | ND                        | No           |
| SRC                 | LFGGFNSSDVTSPQR              | Yes               | 856.92                 | 990.5                 | 14.88                       | 111.5                    | 49.2                | 78889                           | 1127                      | ND                        | No           |
| SRC                 | LLLNAENPR                    | Yes               | 520.3                  | 386.2                 | 11.72                       | 68.1                     | 34.4                | 55595                           | ND                        | ND                        | No           |
| SRC                 | LLLNAENPR                    | Yes               | 520.3                  | 586.3                 | 11.72                       | 68.1                     | 34.4                | 87145                           | ND                        | ND                        | No           |
| SRC                 | LLLNAENPR                    | Yes               | 520.3                  | 700.3                 | 11.72                       | 68.1                     | 25.4                | 180581                          | ND                        | ND                        | No           |
| SRC                 | LLLNAENPR                    | Yes               | 520.3                  | 813.4                 | 11.72                       | 68.1                     | 25.4                | 199431                          | ND                        | ND                        | No           |
| SRC                 | TQFNSLQQLVAYYSK              | Yes               | 895.46                 | 397.2                 | 23.05                       | 116.5                    | 38.9                | 15360                           | ND                        | ND                        | No           |
| SRC                 | TQFNSLQQLVAYYSK              | Yes               | 895.46                 | 560.3                 | 23.05                       | 116.5                    | 47.9                | 7150                            | ND                        | ND                        | No           |
| SRC                 | TQFNSLQQLVAYYSK              | Yes               | 895.46                 | 631.3                 | 23.05                       | 116.5                    | 38.9                | 12878                           | ND                        | ND                        | No           |
| SRC                 | TQFNSLQQLVAYYSK              | Yes               | 895.46                 | 730.4                 | 23.05                       | 116.5                    | 44.9                | 4813                            | ND                        | ND                        | No           |
| SSRD                | GTWNGPWVSTEVLAAGLVIIYLLAFSAK | No                |                        |                       |                             |                          |                     |                                 |                           |                           |              |
| SSRD                | NNEDISIIPPLFTVSVDHR          | Yes               | 722.71                 | 312.2                 | 23.70                       | 94.2                     | 43.4                | 127785                          | ND                        | ND                        | No           |
| SSRD                | NNEDISIIPPLFTVSVDHR          | Yes               | 722.71                 | 358.1                 | 23.70                       | 94.2                     | 31.4                | 27695                           | ND                        | ND                        | No           |
| SSRD                | NNEDISIIPPLFTVSVDHR          | Yes               | 722.71                 | 473.2                 | 23.70                       | 94.2                     | 31.4                | 33156                           | ND                        | ND                        | No           |
| SSRD                | NNEDISIIPPLFTVSVDHR          | Yes               | 722.71                 | 586.2                 | 23.70                       | 94.2                     | 31.4                | 22009                           | ND                        | ND                        | No           |
| SSRD                | QFPVTR                       | No                |                        |                       |                             |                          |                     |                                 |                           |                           |              |

**Table S5.** MRM assay of individual proteins.

| Protein<br>(_HUMAN) | Peptide           | MS/MS<br>spectrum | Precursor ion<br>(m/z) | Fragment ion<br>(m/z) | Retention time<br>(minutes) | Declustering<br>potential | Collision<br>energy | Area of<br>synthetic<br>peptide | Area in control<br>sample | Area in disease<br>sample | Interference |
|---------------------|-------------------|-------------------|------------------------|-----------------------|-----------------------------|---------------------------|---------------------|---------------------------------|---------------------------|---------------------------|--------------|
| SSRD                | SAHAGTYEVR        | Yes               | 545.77                 | 296.1                 | 6.45                        | 71.4                      | 32.5                | 33645                           | ND                        | ND                        | No           |
| SSRD                | SAHAGTYEVR        | Yes               | 545.77                 | 367.2                 | 6.45                        | 71.4                      | 26.5                | 12326                           | ND                        | ND                        | No           |
| SSRD                | SAHAGTYEVR        | Yes               | 545.77                 | 724.4                 | 6.45                        | 71.4                      | 29.5                | 18140                           | ND                        | ND                        | No           |
| SSRD                | SAHAGTYEVR        | Yes               | 545.77                 | 795.4                 | 6.45                        | 71.4                      | 29.5                | 24761                           | ND                        | ND                        | No           |
| SSRD                | YQVSWSLDHK        | Yes               | 631.81                 | 292.1                 | 13.54                       | 82.5                      | 33.3                | 196929                          | ND                        | ND                        | No           |
| SSRD                | YQVSWSLDHK        | Yes               | 631.81                 | 599.3                 | 13.54                       | 82.5                      | 36.3                | 19994                           | ND                        | ND                        | No           |
| SSRD                | YQVSWSLDHK        | Yes               | 631.81                 | 872.4                 | 13.54                       | 82.5                      | 39.3                | 22060                           | ND                        | ND                        | No           |
| SSRD                | YQVSWSLDHK        | Yes               | 631.81                 | 971.5                 | 13.54                       | 82.5                      | 30.3                | 30157                           | ND                        | ND                        | No           |
| STAT1               | FNQAQSGNIQSTVMLDK | Yes               | 941                    | 1205.6                | 16.20                       | 100                       | 46.9                | ND                              | ND                        | ND                        | No           |
| STAT1               | FNQAQSGNIQSTVMLDK | Yes               | 941                    | 793.4                 | 16.20                       | 100                       | 46.9                | ND                              | ND                        | ND                        | No           |
| STAT1               | FNQAQSGNIQSTVMLDK | Yes               | 941                    | 921.5                 | 16.20                       | 100                       | 46.9                | ND                              | ND                        | ND                        | No           |
| STAT1               | LLGPNASPDGLIPWTR  | Yes               | 854                    | 1054.6                | 22.40                       | 100                       | 43.1                | ND                              | ND                        | ND                        | No           |
| STAT1               | LLGPNASPDGLIPWTR  | Yes               | 854                    | 1141.6                | 22.40                       | 100                       | 43.1                | ND                              | ND                        | ND                        | No           |
| STAT1               | LLGPNASPDGLIPWTR  | Yes               | 854                    | 559.3                 | 22.40                       | 100                       | 43.1                | ND                              | ND                        | ND                        | No           |
| STAT1               | LLGPNASPDGLIPWTR  | Yes               | 854                    | 842.5                 | 22.40                       | 100                       | 43.1                | ND                              | ND                        | ND                        | No           |
| STAT1               | TELISVSEVHPSR     | Yes               | 727.386                | 359.204               | 11.69                       | 100                       | 43.5                | ND                              | ND                        | 9962                      | No           |
| STAT1               | TELISVSEVHPSR     | Yes               | 727.386                | 496.3                 | 11.69                       | 100                       | 37.5                | ND                              | ND                        | 3023                      | No           |
| STAT1               | TELISVSEVHPSR     | Yes               | 727.386                | 811.406               | 11.69                       | 100                       | 37.5                | ND                              | ND                        | 7034                      | No           |
| STAT1               | TELISVSEVHPSR     | Yes               | 727.386                | 997.5                 | 11.69                       | 100                       | 37.5                | ND                              | ND                        | ND                        | No           |
| STAT1               | VMAAENIPENPLK     | Yes               | 713.4                  | 1053.6                | 16.90                       | 100                       | 36.9                | ND                              | ND                        | ND                        | No           |
| STAT1               | VMAAENIPENPLK     | Yes               | 713.4                  | 697.4                 | 16.90                       | 100                       | 36.9                | ND                              | ND                        | ND                        | No           |
| STAT1               | VMAAENIPENPLK     | Yes               | 713.4                  | 810.5                 | 16.90                       | 100                       | 36.9                | ND                              | ND                        | ND                        | No           |
| STAT1               | VMAAENIPENPLK     | Yes               | 713.4                  | 924.5                 | 16.90                       | 100                       | 36.9                | ND                              | ND                        | ND                        | No           |

**Table S5.** MRM assay of individual proteins.

| Protein<br>(_HUMAN) | Peptide                   | MS/MS<br>spectrum | Precursor ion<br>(m/z) | Fragment ion<br>(m/z) | Retention time<br>(minutes) | Declustering<br>potential | Collision<br>energy | Area of<br>synthetic<br>peptide | Area in control<br>sample | Area in disease<br>sample | Interference |
|---------------------|---------------------------|-------------------|------------------------|-----------------------|-----------------------------|---------------------------|---------------------|---------------------------------|---------------------------|---------------------------|--------------|
| STAT1               | YTYEHDPIK                 | Yes               | 422.872                | 265.119               | 8.34                        | 100                       | 22.1                | ND                              | ND                        | 26674                     | No           |
| STAT1               | YTYEHDPIK                 | Yes               | 422.872                | 355.7                 | 8.34                        | 100                       | 22.1                | ND                              | ND                        | 22889                     | No           |
| STAT1               | YTYEHDPIK                 | Yes               | 422.872                | 458.298               | 8.34                        | 100                       | 25.1                | ND                              | ND                        | 44991                     | No           |
| STAT1               | YTYEHDPIK                 | Yes               | 422.872                | 710.4                 | 8.34                        | 100                       | 22.1                | ND                              | ND                        | ND                        | No           |
| STAT1               | YTYEHDPIK                 | Yes               | 633.8                  | 458.3                 | 8.34                        | 100                       | 33.4                | ND                              | ND                        | ND                        | No           |
| STAT1               | YTYEHDPIK                 | Yes               | 633.8                  | 501.7                 | 8.34                        | 100                       | 33.4                | ND                              | ND                        | ND                        | No           |
| STAT1               | YTYEHDPIK                 | Yes               | 633.8                  | 710.4                 | 8.34                        | 100                       | 33.4                | ND                              | ND                        | ND                        | No           |
| STAT1               | YTYEHDPIK                 | Yes               | 633.8                  | 809.3                 | 8.34                        | 100                       | 33.4                | ND                              | ND                        | ND                        | No           |
| STAT3               | AILSTKPPGTFLR             | Yes               | 505.31                 | 401.3                 | 17.61                       | 66.2                      | 32.3                | 16798                           | ND                        | ND                        | No           |
| STAT3               | AILSTKPPGTFLR             | Yes               | 505.31                 | 548.4                 | 17.61                       | 66.2                      | 32.3                | 9191                            | ND                        | ND                        | No           |
| STAT3               | AILSTKPPGTFLR             | Yes               | 505.31                 | 803.5                 | 17.61                       | 66.2                      | 32.3                | 79119                           | ND                        | ND                        | No           |
| STAT3               | AILSTKPPGTFLR             | Yes               | 505.31                 | 900.5                 | 17.61                       | 66.2                      | 26.3                | 120448                          | ND                        | ND                        | No           |
| STAT3               | ESHATLVFHNLLGEIDQQYSR     | Yes               | 819.74                 | 354.1                 | 21.70                       | 106.7                     | 36.4                | 5115                            | ND                        | ND                        | No           |
| STAT3               | ESHATLVFHNLLGEIDQQYSR     | Yes               | 819.74                 | 681.3                 | 21.70                       | 106.7                     | 48.4                | 12385                           | ND                        | ND                        | No           |
| STAT3               | ESHATLVFHNLLGEIDQQYSR     | Yes               | 819.74                 | 738.4                 | 21.70                       | 106.7                     | 45.4                | 4895                            | ND                        | ND                        | No           |
| STAT3               | ESHATLVFHNLLGEIDQQYSR     | Yes               | 819.74                 | 796.4                 | 21.70                       | 106.7                     | 42.4                | 8369                            | ND                        | ND                        | No           |
| STAT3               | LENWITSLAESQLQTR          | Yes               | 944.99                 | 543.3                 | 23.08                       | 122.9                     | 41.1                | 2449                            | ND                        | ND                        | No           |
| STAT3               | LENWITSLAESQLQTR          | Yes               | 944.99                 | 656.3                 | 23.08                       | 122.9                     | 41.1                | 3089                            | ND                        | ND                        | No           |
| STAT3               | LENWITSLAESQLQTR          | Yes               | 944.99                 | 732.4                 | 23.08                       | 122.9                     | 41.1                | 2394                            | ND                        | ND                        | No           |
| STAT3               | LENWITSLAESQLQTR          | Yes               | 944.99                 | 861.4                 | 23.08                       | 122.9                     | 50.1                | 2404                            | ND                        | ND                        | No           |
| STAT3               | LLQTAATAAQGGQANHPTAAVVTEK | No                |                        |                       |                             |                           |                     |                                 |                           |                           |              |
| STAT3               | VVENLQDDDFDFNYK           | Yes               | 873.4                  | 310.2                 | 18.22                       | 113.7                     | 40.9                | 5089                            | ND                        | ND                        | No           |
| STAT3               | VVENLQDDDFDFNYK           | Yes               | 873.4                  | 442.2                 | 18.22                       | 113.7                     | 40.9                | 4231                            | ND                        | ND                        | No           |

**Table S5.** MRM assay of individual proteins.

| Protein<br>(_HUMAN) | Peptide         | MS/MS<br>spectrum | Precursor ion<br>(m/z) | Fragment ion<br>(m/z) | Retention time<br>(minutes) | Declustering<br>potential | Collision<br>energy | Area of<br>synthetic<br>peptide | Area in control<br>sample | Area in disease<br>sample | Interference                           |
|---------------------|-----------------|-------------------|------------------------|-----------------------|-----------------------------|---------------------------|---------------------|---------------------------------|---------------------------|---------------------------|----------------------------------------|
| STAT3               | VVENLQDDDFDFNYK | Yes               | 873.4                  | 555.3                 | 18.22                       | 113.7                     | 37.9                | 7882                            | ND                        | ND                        | No                                     |
| STAT3               | VVENLQDDDFDFNYK | Yes               | 873.4                  | 948.4                 | 18.22                       | 113.7                     | 40.9                | 2960                            | ND                        | ND                        | No                                     |
| STC1                | SFLYSAAK        | Yes               | 443.74                 | 376.2                 | 16.19                       | 58.2                      | 31                  | 6755                            | ND                        | ND                        | No                                     |
| STC1                | SFLYSAAK        | Yes               | 443.74                 | 511.3                 | 16.19                       | 58.2                      | 22                  | 1580                            | ND                        | ND                        | No                                     |
| STC1                | SFLYSAAK        | Yes               | 443.74                 | 539.3                 | 16.19                       | 58.2                      | 22                  | 9348                            | 2870                      | 1324                      | Yes (Based on<br>Transition<br>Ratios) |
| STC1                | SFLYSAAK        | Yes               | 443.74                 | 652.4                 | 16.19                       | 58.2                      | 22                  | 7845                            | 36546                     | 28241                     | Yes (Based on<br>Transition<br>Ratios) |
| STC1                | VAAQNSAEVVR     | Yes               | 572.31                 | 274.2                 | 7.19                        | 74.8                      | 24.7                | 5563                            | ND                        | ND                        | No                                     |
| STC1                | VAAQNSAEVVR     | Yes               | 572.31                 | 502.3                 | 7.19                        | 74.8                      | 36.7                | 8166                            | ND                        | ND                        | No                                     |
| STC1                | VAAQNSAEVVR     | Yes               | 572.31                 | 660.4                 | 7.19                        | 74.8                      | 30.7                | 17051                           | ND                        | ND                        | No                                     |
| STC1                | VAAQNSAEVVR     | Yes               | 572.31                 | 774.4                 | 7.19                        | 74.8                      | 33.7                | 36124                           | ND                        | ND                        | No                                     |
| STT3A               | ENDYYTPTGEFR    | Yes               | 746.32                 | 359.1                 | 12.79                       | 97.3                      | 38.3                | 53810                           | ND                        | ND                        | No                                     |
| STT3A               | ENDYYTPTGEFR    | Yes               | 746.32                 | 706.4                 | 12.79                       | 97.3                      | 35.3                | 107523                          | ND                        | ND                        | No                                     |
| STT3A               | ENDYYTPTGEFR    | Yes               | 746.32                 | 807.4                 | 12.79                       | 97.3                      | 35.3                | 80985                           | ND                        | ND                        | No                                     |
| STT3A               | ENDYYTPTGEFR    | Yes               | 746.32                 | 970.5                 | 12.79                       | 97.3                      | 35.3                | 33542                           | ND                        | ND                        | No                                     |
| STT3A               | FESVIHEFDYPFNYR | Yes               | 654.97                 | 277.1                 | 21.37                       | 85.5                      | 28                  | 202848                          | ND                        | ND                        | No                                     |
| STT3A               | FESVIHEFDYPFNYR | Yes               | 654.97                 | 599.3                 | 21.37                       | 85.5                      | 31                  | 114503                          | ND                        | ND                        | No                                     |
| STT3A               | FESVIHEFDYPFNYR | Yes               | 654.97                 | 762.4                 | 21.37                       | 85.5                      | 40                  | 35428                           | ND                        | ND                        | No                                     |
| STT3A               | FESVIHEFDYPFNYR | Yes               | 654.97                 | 859.4                 | 21.37                       | 85.5                      | 40                  | 191228                          | ND                        | ND                        | No                                     |
| STT3A               | FLAEEGFYK       | Yes               | 552.27                 | 643.3                 | 14.77                       | 72.2                      | 29.8                | 247485                          | ND                        | ND                        | No                                     |
| STT3A               | FLAEEGFYK       | Yes               | 552.27                 | 772.4                 | 14.77                       | 72.2                      | 26.8                | 252763                          | ND                        | ND                        | No                                     |



**Table S5.** MRM assay of individual proteins.

| Protein<br>(_HUMAN) | Peptide        | MS/MS<br>spectrum | Precursor ion<br>(m/z) | Fragment ion<br>(m/z) | Retention time<br>(minutes) | Declustering<br>potential | Collision<br>energy | Area of<br>synthetic<br>peptide | Area in control<br>sample | Area in disease<br>sample | Interference                           |
|---------------------|----------------|-------------------|------------------------|-----------------------|-----------------------------|---------------------------|---------------------|---------------------------------|---------------------------|---------------------------|----------------------------------------|
| STT3A               | FLAEEGFYK      | Yes               | 552.27                 | 843.4                 | 14.77                       | 72.2                      | 26.8                | 1415684                         | ND                        | ND                        | No                                     |
| STT3A               | FLAEEGFYK      | Yes               | 552.27                 | 956.5                 | 14.77                       | 72.2                      | 26.8                | 103326                          | ND                        | ND                        | No                                     |
| STT3A               | FYSLLDPSYAK    | Yes               | 652.33                 | 565.3                 | 18.39                       | 85.2                      | 40.2                | 1933745                         | 13200                     | 4635                      | No                                     |
| STT3A               | FYSLLDPSYAK    | Yes               | 652.33                 | 680.3                 | 18.39                       | 85.2                      | 31.2                | 424964                          | ND                        | 1430                      | No                                     |
| STT3A               | FYSLLDPSYAK    | Yes               | 652.33                 | 793.4                 | 18.39                       | 85.2                      | 31.2                | 497872                          | ND                        | 11074                     | Yes (Based on<br>Transition<br>Ratios) |
| STT3A               | FYSLLDPSYAK    | Yes               | 652.33                 | 993.5                 | 18.39                       | 85.2                      | 31.2                | 691753                          | ND                        | ND                        | No                                     |
| STT3A               | IIFDDFR        | Yes               | 463.24                 | 322.2                 | 17.41                       | 60.8                      | 31.9                | 229319                          | 13403                     | 9048                      | No                                     |
| STT3A               | IIFDDFR        | Yes               | 463.24                 | 552.2                 | 17.41                       | 60.8                      | 22.9                | 17303                           | ND                        | ND                        | No                                     |
| STT3A               | IIFDDFR        | Yes               | 463.24                 | 699.3                 | 17.41                       | 60.8                      | 22.9                | 144370                          | ND                        | ND                        | No                                     |
| STT3A               | IIFDDFR        | Yes               | 463.24                 | 812.4                 | 17.41                       | 60.8                      | 22.9                | 14846                           | ND                        | ND                        | No                                     |
| TAGL                | AAEDYGVIK      | Yes               | 483.25                 | 579.4                 | 10.00                       | 63.3                      | 26.8                | 67577                           | ND                        | ND                        | No                                     |
| TAGL                | AAEDYGVIK      | Yes               | 483.25                 | 694.4                 | 10.00                       | 63.3                      | 23.8                | 75872                           | ND                        | ND                        | No                                     |
| TAGL                | AAEDYGVIK      | Yes               | 483.25                 | 823.4                 | 10.00                       | 63.3                      | 23.8                | 140912                          | ND                        | ND                        | No                                     |
| TAGL                | AAEDYGVIK      | Yes               | 483.25                 | 894.5                 | 10.00                       | 63.3                      | 23.8                | 19445                           | ND                        | ND                        | No                                     |
| TAGL                | LGFQVWLK       | Yes               | 495.79                 | 673.4                 | 20.80                       | 65                        | 21.3                | 41548                           | ND                        | ND                        | No                                     |
| TAGL                | LGFQVWLK       | Yes               | 495.79                 | 731.4                 | 20.80                       | 65                        | 24.3                | 16006                           | ND                        | ND                        | No                                     |
| TAGL                | LGFQVWLK       | Yes               | 495.79                 | 820.5                 | 20.80                       | 65                        | 24.3                | 83479                           | ND                        | ND                        | No                                     |
| TAGL                | LGFQVWLK       | Yes               | 495.79                 | 877.5                 | 20.80                       | 65                        | 24.3                | 145144                          | ND                        | ND                        | No                                     |
| TAGL                | LVNSLYPDGSKPVK | Yes               | 506.28                 | 414.2                 | 11.09                       | 66.3                      | 26.4                | 196067                          | ND                        | ND                        | No                                     |
| TAGL                | LVNSLYPDGSKPVK | Yes               | 506.28                 | 615.4                 | 11.09                       | 66.3                      | 29.4                | 48165                           | ND                        | ND                        | No                                     |
| TAGL                | LVNSLYPDGSKPVK | Yes               | 506.28                 | 827.5                 | 11.09                       | 66.3                      | 26.4                | 153727                          | ND                        | ND                        | No                                     |
| TAGL                | LVNSLYPDGSKPVK | Yes               | 506.28                 | 990.5                 | 11.09                       | 66.3                      | 23.4                | 15492                           | ND                        | ND                        | No                                     |

**Table S5.** MRM assay of individual proteins.

| Protein<br>(_HUMAN) | Peptide     | MS/MS<br>spectrum | Precursor ion<br>(m/z) | Fragment ion<br>(m/z) | Retention time<br>(minutes) | Declustering<br>potential | Collision<br>energy | Area of<br>synthetic<br>peptide | Area in control<br>sample | Area in disease<br>sample | Interference |
|---------------------|-------------|-------------------|------------------------|-----------------------|-----------------------------|---------------------------|---------------------|---------------------------------|---------------------------|---------------------------|--------------|
| TAGL                | NDGHYR      | Yes               | 381.17                 | 338.2                 | 5.26                        | 50.2                      | 25.3                | 16914                           | ND                        | ND                        | No           |
| TAGL                | NDGHYR      | Yes               | 381.17                 | 475.2                 | 5.26                        | 50.2                      | 25.3                | 5756                            | ND                        | ND                        | No           |
| TAGL                | NDGHYR      | Yes               | 381.17                 | 532.3                 | 5.26                        | 50.2                      | 22.3                | 13168                           | ND                        | ND                        | No           |
| TAGL                | NDGHYR      | Yes               | 381.17                 | 647.3                 | 5.26                        | 50.2                      | 22.3                | 5354                            | ND                        | ND                        | No           |
| TAGL                | NGVILSK     | Yes               | 365.73                 | 271.1                 | 8.42                        | 48.2                      | 18.6                | 122488                          | ND                        | ND                        | No           |
| TAGL                | NGVILSK     | Yes               | 365.73                 | 460.3                 | 8.42                        | 48.2                      | 18.6                | 175691                          | ND                        | ND                        | No           |
| TAGL                | NGVILSK     | Yes               | 365.73                 | 559.4                 | 8.42                        | 48.2                      | 18.6                | 31175                           | ND                        | ND                        | No           |
| TAGL                | NGVILSK     | Yes               | 365.73                 | 616.4                 | 8.42                        | 48.2                      | 18.6                | 46640                           | ND                        | ND                        | No           |
| TARA                | AGSEVISR    | Yes               | 409.72                 | 375.2                 | 6.56                        | 53.9                      | 20.5                | 32598                           | ND                        | ND                        | No           |
| TARA                | AGSEVISR    | Yes               | 409.72                 | 474.3                 | 6.56                        | 53.9                      | 23.5                | 30271                           | ND                        | ND                        | No           |
| TARA                | AGSEVISR    | Yes               | 409.72                 | 603.3                 | 6.56                        | 53.9                      | 17.5                | 7174                            | ND                        | ND                        | No           |
| TARA                | AGSEVISR    | Yes               | 409.72                 | 690.4                 | 6.56                        | 53.9                      | 20.5                | 8089                            | ND                        | ND                        | No           |
| TARA                | ASSTQQEISR  | Yes               | 553.78                 | 475.2                 | 5.95                        | 72.4                      | 23.9                | 6103                            | ND                        | ND                        | No           |
| TARA                | ASSTQQEISR  | Yes               | 553.78                 | 504.3                 | 5.95                        | 72.4                      | 23.9                | 5882                            | ND                        | ND                        | No           |
| TARA                | ASSTQQEISR  | Yes               | 553.78                 | 632.3                 | 5.95                        | 72.4                      | 32.9                | 21676                           | ND                        | ND                        | No           |
| TARA                | ASSTQQEISR  | Yes               | 553.78                 | 760.4                 | 5.95                        | 72.4                      | 26.9                | 10685                           | ND                        | ND                        | No           |
| TARA                | LQGEAPQSALR | Yes               | 585.32                 | 359.2                 | 8.82                        | 76.5                      | 34.3                | 38307                           | ND                        | ND                        | No           |
| TARA                | LQGEAPQSALR | Yes               | 585.32                 | 671.4                 | 8.82                        | 76.5                      | 34.3                | 1732                            | ND                        | ND                        | No           |
| TARA                | LQGEAPQSALR | Yes               | 585.32                 | 928.5                 | 8.82                        | 76.5                      | 28.3                | 2644                            | ND                        | ND                        | No           |
| TARA                | LSEEIDQLR   | Yes               | 551.79                 | 531.3                 | 12.23                       | 72.2                      | 29.8                | 72095                           | ND                        | ND                        | No           |
| TARA                | LSEEIDQLR   | Yes               | 551.79                 | 773.4                 | 12.23                       | 72.2                      | 29.8                | 35568                           | ND                        | ND                        | No           |
| TARA                | LSEEIDQLR   | Yes               | 551.79                 | 902.5                 | 12.23                       | 72.2                      | 26.8                | 24032                           | ND                        | ND                        | No           |
| TARA                | LSEEIDQLR   | Yes               | 551.79                 | 989.5                 | 12.23                       | 72.2                      | 32.8                | 25091                           | ND                        | ND                        | No           |

**Table S5.** MRM assay of individual proteins.

| Protein<br>(_HUMAN) | Peptide         | MS/MS<br>spectrum | Precursor ion<br>(m/z) | Fragment ion<br>(m/z) | Retention time<br>(minutes) | Declustering<br>potential | Collision<br>energy | Area of<br>synthetic<br>peptide | Area in control<br>sample | Area in disease<br>sample | Interference |
|---------------------|-----------------|-------------------|------------------------|-----------------------|-----------------------------|---------------------------|---------------------|---------------------------------|---------------------------|---------------------------|--------------|
| TARA                | YQDVYVELSHIK    | Yes               | 498.59                 | 407.2                 | 16.37                       | 65.3                      | 29                  | 30136                           | ND                        | ND                        | No           |
| TARA                | YQDVYVELSHIK    | Yes               | 498.59                 | 597.4                 | 16.37                       | 65.3                      | 23                  | 25786                           | ND                        | ND                        | No           |
| TARA                | YQDVYVELSHIK    | Yes               | 498.59                 | 726.4                 | 16.37                       | 65.3                      | 26                  | 34912                           | ND                        | ND                        | No           |
| TARA                | YQDVYVELSHIK    | Yes               | 498.59                 | 825.5                 | 16.37                       | 65.3                      | 23                  | 11214                           | ND                        | ND                        | No           |
| TBA1B               | AVFVDLEPTVIDEVR | Yes               | 851.456                | 1057.55               | 19.86                       | 100                       | 37                  | ND                              | ND                        | ND                        | No           |
| TBA1B               | AVFVDLEPTVIDEVR | Yes               | 851.456                | 1170.6                | 19.86                       | 100                       | 43                  | ND                              | ND                        | ND                        | No           |
| TBA1B               | AVFVDLEPTVIDEVR | Yes               | 851.456                | 631.3                 | 19.86                       | 100                       | 43                  | ND                              | ND                        | ND                        | No           |
| TBA1B               | AVFVDLEPTVIDEVR | Yes               | 851.456                | 928.51                | 19.86                       | 100                       | 46                  | ND                              | ND                        | ND                        | No           |
| TBA1B               | EIIDLVLDLDR     | Yes               | 543.313                | 403.2                 | 18.62                       | 100                       | 29.4                | ND                              | ND                        | ND                        | No           |
| TBA1B               | EIIDLVLDLDR     | Yes               | 543.313                | 502.299               | 18.62                       | 100                       | 23.4                | ND                              | ND                        | ND                        | No           |
| TBA1B               | EIIDLVLDLDR     | Yes               | 543.313                | 730.41                | 18.62                       | 100                       | 26.4                | ND                              | ND                        | ND                        | No           |
| TBA1B               | EIIDLVLDLDR     | Yes               | 543.313                | 843.5                 | 18.62                       | 100                       | 29.4                | ND                              | ND                        | ND                        | No           |
| TBB2A               | AILVDLEPGTMDSVR | Yes               | 808.42                 | 298.2                 | 20.02                       | 105.3                     | 41.1                | 215017                          | 12251                     | 13536                     | No           |
| TBB2A               | AILVDLEPGTMDSVR | Yes               | 808.42                 | 754.4                 | 20.02                       | 105.3                     | 35.1                | 107749                          | ND                        | 3732                      | No           |
| TBB2A               | AILVDLEPGTMDSVR | Yes               | 808.42                 | 862.4                 | 20.02                       | 105.3                     | 38.1                | 416366                          | 14445                     | 15123                     | No           |
| TBB2A               | AILVDLEPGTMDSVR | Yes               | 808.42                 | 991.5                 | 20.02                       | 105.3                     | 35.1                | 78984                           | ND                        | ND                        | No           |
| TBB2A               | EVDEQMLNVQNK    | Yes               | 723.85                 | 389.2                 | 13.05                       | 94.4                      | 31.3                | 1249923                         | ND                        | ND                        | No           |
| TBB2A               | EVDEQMLNVQNK    | Yes               | 723.85                 | 488.3                 | 13.05                       | 94.4                      | 34.3                | 710517                          | ND                        | ND                        | No           |
| TBB2A               | EVDEQMLNVQNK    | Yes               | 723.85                 | 602.3                 | 13.05                       | 94.4                      | 34.3                | 1503983                         | ND                        | ND                        | No           |
| TBB2A               | EVDEQMLNVQNK    | Yes               | 723.85                 | 846.5                 | 13.05                       | 94.4                      | 34.3                | 1151947                         | ND                        | ND                        | No           |
| TBB2A               | FPGQLNADLR      | Yes               | 565.8                  | 288.2                 | 15.30                       | 74                        | 33.4                | 10439534                        | ND                        | ND                        | No           |
| TBB2A               | FPGQLNADLR      | Yes               | 565.8                  | 701.4                 | 15.30                       | 74                        | 36.4                | 1306410                         | ND                        | ND                        | No           |
| TBB2A               | FPGQLNADLR      | Yes               | 565.8                  | 843.4                 | 15.30                       | 74                        | 27.4                | 1317171                         | ND                        | ND                        | No           |

**Table S5.** MRM assay of individual proteins.

| Protein<br>(_HUMAN) | Peptide                    | MS/MS<br>spectrum | Precursor ion<br>(m/z) | Fragment ion<br>(m/z) | Retention time<br>(minutes) | Declustering<br>potential | Collision<br>energy | Area of<br>synthetic<br>peptide | Area in control<br>sample | Area in disease<br>sample | Interference |
|---------------------|----------------------------|-------------------|------------------------|-----------------------|-----------------------------|---------------------------|---------------------|---------------------------------|---------------------------|---------------------------|--------------|
| TBB2A               | FPGQLNADLR                 | Yes               | 565.8                  | 886.5                 | 15.30                       | 74                        | 33.4                | 3202550                         | ND                        | ND                        | No           |
| TBB2A               | GHYTEGAELVDSVLDVVR         | Yes               | 979.99                 | 358.2                 | 24.86                       | 127.4                     | 54.6                | 116201                          | ND                        | ND                        | No           |
| TBB2A               | GHYTEGAELVDSVLDVVR         | Yes               | 979.99                 | 588.2                 | 24.86                       | 127.4                     | 48.6                | 34030                           | ND                        | ND                        | No           |
| TBB2A               | GHYTEGAELVDSVLDVVR         | Yes               | 979.99                 | 845.3                 | 24.86                       | 127.4                     | 42.6                | 17082                           | ND                        | ND                        | No           |
| TBB2A               | GHYTEGAELVDSVLDVVR         | Yes               | 979.99                 | 902.5                 | 24.86                       | 127.4                     | 45.6                | 21921                           | ND                        | ND                        | No           |
| TBB2A               | ISEQFTAMFR                 | Yes               | 615.3                  | 453.2                 | 19.95                       | 80.4                      | 35.6                | 104452                          | ND                        | ND                        | No           |
| TBB2A               | ISEQFTAMFR                 | Yes               | 615.3                  | 524.3                 | 19.95                       | 80.4                      | 32.6                | 170251                          | ND                        | ND                        | No           |
| TBB2A               | ISEQFTAMFR                 | Yes               | 615.3                  | 772.4                 | 19.95                       | 80.4                      | 35.6                | 288014                          | ND                        | ND                        | No           |
| TBB2A               | ISEQFTAMFR                 | Yes               | 615.3                  | 900.4                 | 19.95                       | 80.4                      | 29.6                | 98583                           | ND                        | ND                        | No           |
| TBB2A               | LAVNMVPFPR                 | Yes               | 572.32                 | 516.3                 | 19.63                       | 74.8                      | 27.7                | 3192860                         | ND                        | ND                        | No           |
| TBB2A               | LAVNMVPFPR                 | Yes               | 572.32                 | 615.4                 | 19.63                       | 74.8                      | 36.7                | 728533                          | ND                        | ND                        | No           |
| TBB2A               | LAVNMVPFPR                 | Yes               | 572.32                 | 860.4                 | 19.63                       | 74.8                      | 30.7                | 1014914                         | ND                        | ND                        | No           |
| TBB2A               | LAVNMVPFPR                 | Yes               | 572.32                 | 959.5                 | 19.63                       | 74.8                      | 27.7                | 283699                          | ND                        | ND                        | No           |
| TBB2A               | LHFFMPGFAPLTSR             | Yes               | 540.95                 | 363.2                 | 24.02                       | 70.8                      | 34.1                | 108471                          | ND                        | ND                        | No           |
| TBB2A               | LHFFMPGFAPLTSR             | Yes               | 540.95                 | 573.3                 | 24.02                       | 70.8                      | 25.1                | 599921                          | ND                        | ND                        | No           |
| TBB2A               | LHFFMPGFAPLTSR             | Yes               | 540.95                 | 676.3                 | 24.02                       | 70.8                      | 28.1                | 97316                           | ND                        | ND                        | No           |
| TBB2A               | LHFFMPGFAPLTSR             | Yes               | 540.95                 | 830.4                 | 24.02                       | 70.8                      | 25.1                | 111968                          | ND                        | ND                        | No           |
| TBB2A               | MSATFIGNSTAIQELFK          | No                |                        |                       |                             |                           |                     |                                 |                           |                           |              |
| TBB2A               | NSSYFVEWIPNNVK             | Yes               | 848.92                 | 571.3                 | 21.68                       | 110.5                     | 48.9                | 1305800                         | ND                        | ND                        | No           |
| TBB2A               | NSSYFVEWIPNNVK             | Yes               | 848.92                 | 684.4                 | 21.68                       | 110.5                     | 36.9                | 256555                          | ND                        | ND                        | No           |
| TBB2A               | NSSYFVEWIPNNVK             | Yes               | 848.92                 | 870.5                 | 21.68                       | 110.5                     | 39.9                | 260320                          | ND                        | ND                        | No           |
| TBB2A               | NSSYFVEWIPNNVK             | Yes               | 848.92                 | 999.5                 | 21.68                       | 110.5                     | 39.9                | 207943                          | ND                        | ND                        | No           |
| TBB2A               | SGPFGQIFRPDNFVFGQSGAGNNWAK | Yes               | 933.45                 | 574.3                 | 23.78                       | 121.4                     | 48.2                | ND                              | ND                        | ND                        | No           |

**Table S5.** MRM assay of individual proteins.

| Protein<br>(_HUMAN) | Peptide                    | MS/MS<br>spectrum | Precursor ion<br>(m/z) | Fragment ion<br>(m/z) | Retention time<br>(minutes) | Declustering<br>potential | Collision<br>energy | Area of<br>synthetic<br>peptide | Area in control<br>sample | Area in disease<br>sample | Interference |
|---------------------|----------------------------|-------------------|------------------------|-----------------------|-----------------------------|---------------------------|---------------------|---------------------------------|---------------------------|---------------------------|--------------|
| TBB2A               | SGPFGQIFRPDNFVFGQSGAGNNWAK | Yes               | 933.45                 | 687.3                 | 23.78                       | 121.4                     | 54.2                | ND                              | ND                        | ND                        | No           |
| TBB2A               | SGPFGQIFRPDNFVFGQSGAGNNWAK | Yes               | 933.45                 | 817.4                 | 23.78                       | 121.4                     | 45.2                | ND                              | ND                        | ND                        | No           |
| TBB2A               | SGPFGQIFRPDNFVFGQSGAGNNWAK | Yes               | 933.45                 | 904.4                 | 23.78                       | 121.4                     | 51.2                | ND                              | ND                        | ND                        | No           |
| TBB3                | ALTVPELTQQMFDAK            | Yes               | 846.4                  | 654.3                 | 23.40                       | 100                       | 42.7                | ND                              | ND                        | ND                        | No           |
| TBB3                | ALTVPELTQQMFDAK            | Yes               | 846.4                  | 703.9                 | 23.40                       | 100                       | 42.7                | ND                              | ND                        | ND                        | No           |
| TBB3                | ALTVPELTQQMFDAK            | Yes               | 846.4                  | 968.5                 | 23.40                       | 100                       | 42.7                | ND                              | ND                        | ND                        | No           |
| TBB3                | EVDEQMLAIQSK               | Yes               | 695.8                  | 475.3                 | 15.60                       | 100                       | 36.1                | ND                              | ND                        | ND                        | No           |
| TBB3                | EVDEQMLAIQSK               | Yes               | 695.8                  | 546.3                 | 15.60                       | 100                       | 36.1                | ND                              | ND                        | ND                        | No           |
| TBB3                | EVDEQMLAIQSK               | Yes               | 695.8                  | 659.4                 | 15.60                       | 100                       | 36.1                | ND                              | ND                        | ND                        | No           |
| TBB3                | EVDEQMLAIQSK               | Yes               | 695.8                  | 790.5                 | 15.60                       | 100                       | 36.1                | ND                              | ND                        | ND                        | No           |
| TBB3                | ISVYYNEASSHK               | Yes               | 466.562                | 201.124               | 8.88                        | 100                       | 21.3                | ND                              | 38473                     | 44339                     | No           |
| TBB3                | ISVYYNEASSHK               | Yes               | 466.562                | 458.236               | 8.88                        | 100                       | 27.3                | ND                              | 958929                    | 535335                    | No           |
| TBB3                | ISVYYNEASSHK               | Yes               | 466.562                | 529.3                 | 8.88                        | 100                       | 24.3                | ND                              | 28811                     | 16234                     | No           |
| TBB3                | ISVYYNEASSHK               | Yes               | 466.562                | 935.4                 | 8.88                        | 100                       | 24.3                | ND                              | ND                        | ND                        | No           |
| TBB3                | ISVYYNEASSHK               | Yes               | 699.3                  | 1098.5                | 8.88                        | 100                       | 36.3                | ND                              | ND                        | ND                        | No           |
| TBB3                | ISVYYNEASSHK               | Yes               | 699.3                  | 599.3                 | 8.88                        | 100                       | 36.3                | ND                              | ND                        | ND                        | No           |
| TBB3                | ISVYYNEASSHK               | Yes               | 699.3                  | 772.4                 | 8.88                        | 100                       | 36.3                | ND                              | ND                        | ND                        | No           |
| TBB3                | ISVYYNEASSHK               | Yes               | 699.3                  | 935.4                 | 8.88                        | 100                       | 36.3                | ND                              | ND                        | ND                        | No           |
| TBB3                | MSSTFIGNSTAIQELFK          | Yes               | 937.5                  | 1036.6                | 25.00                       | 100                       | 46.7                | ND                              | ND                        | 14544                     | No           |
| TBB3                | MSSTFIGNSTAIQELFK          | Yes               | 937.5                  | 1207.6                | 25.00                       | 100                       | 46.7                | ND                              | ND                        | 27100                     | No           |
| TBB3                | MSSTFIGNSTAIQELFK          | Yes               | 937.5                  | 536.3                 | 25.00                       | 100                       | 46.7                | ND                              | ND                        | 43607                     | No           |
| TBB3                | MSSTFIGNSTAIQELFK          | Yes               | 937.5                  | 664.4                 | 25.00                       | 100                       | 46.7                | ND                              | ND                        | 104439                    | No           |
| TBB3                | YLT VATVFR                 | Yes               | 535.306                | 277.2                 | 17.21                       | 100                       | 29.1                | ND                              | ND                        | ND                        | No           |

**Table S5.** MRM assay of individual proteins.

| Protein<br>(_HUMAN) | Peptide            | MS/MS<br>spectrum | Precursor ion<br>(m/z) | Fragment ion<br>(m/z) | Retention time<br>(minutes) | Decustering<br>potential | Collision<br>energy | Area of<br>synthetic<br>peptide | Area in control<br>sample | Area in disease<br>sample | Interference |
|---------------------|--------------------|-------------------|------------------------|-----------------------|-----------------------------|--------------------------|---------------------|---------------------------------|---------------------------|---------------------------|--------------|
| TBB3                | YLTVATVFR          | Yes               | 535.306                | 593.3                 | 17.21                       | 100                      | 29.1                | ND                              | 2832                      | 3421                      | No           |
| TBB3                | YLTVATVFR          | Yes               | 535.306                | 692.41                | 17.21                       | 100                      | 26.1                | ND                              | 91889                     | 83241                     | No           |
| TBB3                | YLTVATVFR          | Yes               | 535.306                | 793.457               | 17.21                       | 100                      | 26.1                | ND                              | 39628                     | 19768                     | No           |
| TBB5                | AILVDLEPGTMDSVR    | Yes               | 808.42                 | 298.2                 | 20.02                       | 105.3                    | 41.1                | 215017                          | 12251                     | 13536                     | No           |
| TBB5                | AILVDLEPGTMDSVR    | Yes               | 808.42                 | 754.4                 | 20.02                       | 105.3                    | 35.1                | 107749                          | ND                        | 3732                      | No           |
| TBB5                | AILVDLEPGTMDSVR    | Yes               | 808.42                 | 862.4                 | 20.02                       | 105.3                    | 38.1                | 416366                          | 14445                     | 15123                     | No           |
| TBB5                | AILVDLEPGTMDSVR    | Yes               | 808.42                 | 991.5                 | 20.02                       | 105.3                    | 35.1                | 78984                           | ND                        | ND                        | No           |
| TBB5                | FPGQLNADLR         | Yes               | 565.8                  | 288.2                 | 15.30                       | 74                       | 33.4                | 10439534                        | ND                        | ND                        | No           |
| TBB5                | FPGQLNADLR         | Yes               | 565.8                  | 701.4                 | 15.30                       | 74                       | 36.4                | 1306410                         | ND                        | ND                        | No           |
| TBB5                | FPGQLNADLR         | Yes               | 565.8                  | 843.4                 | 15.30                       | 74                       | 27.4                | 1317171                         | ND                        | ND                        | No           |
| TBB5                | FPGQLNADLR         | Yes               | 565.8                  | 886.5                 | 15.30                       | 74                       | 33.4                | 3202550                         | ND                        | ND                        | No           |
| TBB5                | GHYTEGAELVDSVLDVVR | Yes               | 979.99                 | 358.2                 | 24.86                       | 127.4                    | 54.6                | 116201                          | ND                        | ND                        | No           |
| TBB5                | GHYTEGAELVDSVLDVVR | Yes               | 979.99                 | 588.2                 | 24.86                       | 127.4                    | 48.6                | 34030                           | ND                        | ND                        | No           |
| TBB5                | GHYTEGAELVDSVLDVVR | Yes               | 979.99                 | 845.3                 | 24.86                       | 127.4                    | 42.6                | 17082                           | ND                        | ND                        | No           |
| TBB5                | GHYTEGAELVDSVLDVVR | Yes               | 979.99                 | 902.5                 | 24.86                       | 127.4                    | 45.6                | 21921                           | ND                        | ND                        | No           |
| TBB5                | IMNTFSVVPSPK       | No                |                        |                       |                             |                          |                     |                                 |                           |                           |              |
| TBB5                | ISEQFTAMFR         | Yes               | 615.3                  | 453.2                 | 19.95                       | 80.4                     | 35.6                | 104452                          | ND                        | ND                        | No           |
| TBB5                | ISEQFTAMFR         | Yes               | 615.3                  | 524.3                 | 19.95                       | 80.4                     | 32.6                | 170251                          | ND                        | ND                        | No           |
| TBB5                | ISEQFTAMFR         | Yes               | 615.3                  | 772.4                 | 19.95                       | 80.4                     | 35.6                | 288014                          | ND                        | ND                        | No           |
| TBB5                | ISEQFTAMFR         | Yes               | 615.3                  | 900.4                 | 19.95                       | 80.4                     | 29.6                | 98583                           | ND                        | ND                        | No           |
| TBB5                | LAVNMVPFPR         | Yes               | 572.32                 | 516.3                 | 19.63                       | 74.8                     | 27.7                | 3192860                         | ND                        | ND                        | No           |
| TBB5                | LAVNMVPFPR         | Yes               | 572.32                 | 615.4                 | 19.63                       | 74.8                     | 36.7                | 728533                          | ND                        | ND                        | No           |
| TBB5                | LAVNMVPFPR         | Yes               | 572.32                 | 860.4                 | 19.63                       | 74.8                     | 30.7                | 1014914                         | ND                        | ND                        | No           |

**Table S5.** MRM assay of individual proteins.

| Protein<br>(_HUMAN) | Peptide           | MS/MS<br>spectrum | Precursor ion<br>(m/z) | Fragment ion<br>(m/z) | Retention time<br>(minutes) | Decustering<br>potential | Collision<br>energy | Area of<br>synthetic<br>peptide | Area in control<br>sample | Area in disease<br>sample | Interference |
|---------------------|-------------------|-------------------|------------------------|-----------------------|-----------------------------|--------------------------|---------------------|---------------------------------|---------------------------|---------------------------|--------------|
| TBB5                | LAVNMVPFPR        | Yes               | 572.32                 | 959.5                 | 19.63                       | 74.8                     | 27.7                | 283699                          | ND                        | ND                        | No           |
| TBB5                | LHFFMPGFAPLTSR    | Yes               | 540.95                 | 363.2                 | 24.02                       | 70.8                     | 34.1                | 108471                          | ND                        | ND                        | No           |
| TBB5                | LHFFMPGFAPLTSR    | Yes               | 540.95                 | 573.3                 | 24.02                       | 70.8                     | 25.1                | 599921                          | ND                        | ND                        | No           |
| TBB5                | LHFFMPGFAPLTSR    | Yes               | 540.95                 | 676.3                 | 24.02                       | 70.8                     | 28.1                | 97316                           | ND                        | ND                        | No           |
| TBB5                | LHFFMPGFAPLTSR    | Yes               | 540.95                 | 830.4                 | 24.02                       | 70.8                     | 25.1                | 111968                          | ND                        | ND                        | No           |
| TBB5                | MAVTFIGNSTAIQELFK | No                |                        |                       |                             |                          |                     |                                 |                           |                           |              |
| TBB5                | NSSYFVEWIPNNVK    | Yes               | 848.92                 | 571.3                 | 21.68                       | 110.5                    | 48.9                | 1305800                         | ND                        | ND                        | No           |
| TBB5                | NSSYFVEWIPNNVK    | Yes               | 848.92                 | 684.4                 | 21.68                       | 110.5                    | 36.9                | 256555                          | ND                        | ND                        | No           |
| TBB5                | NSSYFVEWIPNNVK    | Yes               | 848.92                 | 870.5                 | 21.68                       | 110.5                    | 39.9                | 260320                          | ND                        | ND                        | No           |
| TBB5                | NSSYFVEWIPNNVK    | Yes               | 848.92                 | 999.5                 | 21.68                       | 110.5                    | 39.9                | 207943                          | ND                        | ND                        | No           |
| TBB5                | YLTVAAVFR         | Yes               | 520.3                  | 492.3                 | 20.85                       | 68.1                     | 25.4                | 384016                          | ND                        | ND                        | No           |
| TBB5                | YLTVAAVFR         | Yes               | 520.3                  | 563.3                 | 20.85                       | 68.1                     | 28.4                | 1135831                         | ND                        | ND                        | No           |
| TBB5                | YLTVAAVFR         | Yes               | 520.3                  | 662.4                 | 20.85                       | 68.1                     | 25.4                | 460826                          | ND                        | ND                        | No           |
| TBB5                | YLTVAAVFR         | Yes               | 520.3                  | 763.4                 | 20.85                       | 68.1                     | 25.4                | 1568096                         | ND                        | ND                        | No           |
| TCPA                | FATEAAITILR       | Yes               | 603.35                 | 502.3                 | 17.76                       | 78.8                     | 26                  | 28642                           | ND                        | ND                        | No           |
| TCPA                | FATEAAITILR       | Yes               | 603.35                 | 686.5                 | 17.76                       | 78.8                     | 29                  | 27488                           | ND                        | ND                        | No           |
| TCPA                | FATEAAITILR       | Yes               | 603.35                 | 757.5                 | 17.76                       | 78.8                     | 38                  | 41795                           | ND                        | ND                        | No           |
| TCPA                | FATEAAITILR       | Yes               | 603.35                 | 987.6                 | 17.76                       | 78.8                     | 29                  | 10869                           | ND                        | ND                        | No           |
| TCPA                | IHPTSVISGYR       | Yes               | 615.34                 | 251.2                 | 14.09                       | 80.4                     | 29.6                | 197929                          | 335561                    | 171316                    | No           |
| TCPA                | IHPTSVISGYR       | Yes               | 615.34                 | 781.4                 | 14.09                       | 80.4                     | 29.6                | ND                              | ND                        | ND                        | No           |
| TCPA                | IHPTSVISGYR       | Yes               | 615.34                 | 892.5                 | 14.09                       | 80.4                     | 29.6                | ND                              | ND                        | ND                        | No           |
| TCPA                | IHPTSVISGYR       | Yes               | 615.34                 | 979.5                 | 14.09                       | 80.4                     | 29.6                | 44113                           | 86797                     | 46592                     | No           |
| TCPA                | LGVQVVITDPEK      | No                |                        |                       |                             |                          |                     |                                 |                           |                           |              |

**Table S5.** MRM assay of individual proteins.

| Protein<br>(_HUMAN) | Peptide         | MS/MS<br>spectrum | Precursor ion<br>(m/z) | Fragment ion<br>(m/z) | Retention time<br>(minutes) | Declustering<br>potential | Collision<br>energy | Area of<br>synthetic<br>peptide | Area in control<br>sample | Area in disease<br>sample | Interference |
|---------------------|-----------------|-------------------|------------------------|-----------------------|-----------------------------|---------------------------|---------------------|---------------------------------|---------------------------|---------------------------|--------------|
| TCPA                | SSLGPVGLDK      | Yes               | 486.77                 | 432.2                 | 11.67                       | 63.8                      | 32.9                | 553086                          | ND                        | ND                        | No           |
| TCPA                | SSLGPVGLDK      | Yes               | 486.77                 | 628.4                 | 11.67                       | 63.8                      | 23.9                | 501469                          | ND                        | ND                        | No           |
| TCPA                | SSLGPVGLDK      | Yes               | 486.77                 | 685.4                 | 11.67                       | 63.8                      | 23.9                | 1048739                         | ND                        | ND                        | No           |
| TCPA                | SSLGPVGLDK      | Yes               | 486.77                 | 798.5                 | 11.67                       | 63.8                      | 23.9                | 367030                          | ND                        | ND                        | No           |
| TCPA                | YINENLIVNTDELGR | No                |                        |                       |                             |                           |                     |                                 |                           |                           |              |
| TCPD                | AYILNLVK        | Yes               | 467.29                 | 359.3                 | 17.78                       | 61.3                      | 29.1                | 13366                           | ND                        | ND                        | No           |
| TCPD                | AYILNLVK        | Yes               | 467.29                 | 586.4                 | 17.78                       | 61.3                      | 23.1                | 69764                           | ND                        | ND                        | No           |
| TCPD                | AYILNLVK        | Yes               | 467.29                 | 699.5                 | 17.78                       | 61.3                      | 23.1                | 99354                           | ND                        | ND                        | No           |
| TCPD                | AYILNLVK        | Yes               | 467.29                 | 862.5                 | 17.78                       | 61.3                      | 23.1                | 4239                            | ND                        | ND                        | No           |
| TCPD                | GDVTITNDGATILK  | No                |                        |                       |                             |                           |                     |                                 |                           |                           |              |
| TCPD                | GIHPTIISESFQK   | Yes               | 728.89                 | 275.2                 | 14.02                       | 95                        | 43.6                | 4958                            | ND                        | ND                        | No           |
| TCPD                | GIHPTIISESFQK   | Yes               | 728.89                 | 308.2                 | 14.02                       | 95                        | 37.6                | 48360                           | ND                        | ND                        | No           |
| TCPD                | GIHPTIISESFQK   | Yes               | 728.89                 | 509.3                 | 14.02                       | 95                        | 43.6                | 6900                            | ND                        | ND                        | No           |
| TCPD                | GIHPTIISESFQK   | Yes               | 728.89                 | 838.4                 | 14.02                       | 95                        | 43.6                | 2569                            | ND                        | ND                        | No           |
| TCPD                | IDDVVNTR        | Yes               | 466.25                 | 489.3                 | 8.42                        | 61.1                      | 20                  | 27850                           | ND                        | ND                        | No           |
| TCPD                | IDDVVNTR        | Yes               | 466.25                 | 588.3                 | 8.42                        | 61.1                      | 32                  | 19884                           | ND                        | ND                        | No           |
| TCPD                | IDDVVNTR        | Yes               | 466.25                 | 703.4                 | 8.42                        | 61.1                      | 23                  | 34778                           | ND                        | ND                        | No           |
| TCPD                | IDDVVNTR        | Yes               | 466.25                 | 818.4                 | 8.42                        | 61.1                      | 23                  | 27380                           | ND                        | ND                        | No           |
| TCPD                | VIDPATATSVDLR   | Yes               | 453.25                 | 288.2                 | 13.80                       | 59.5                      | 29.7                | 135452                          | ND                        | ND                        | No           |
| TCPD                | VIDPATATSVDLR   | Yes               | 453.25                 | 502.3                 | 13.80                       | 59.5                      | 20.7                | 14680                           | ND                        | ND                        | No           |
| TCPD                | VIDPATATSVDLR   | Yes               | 453.25                 | 589.3                 | 13.80                       | 59.5                      | 17.7                | 19088                           | ND                        | ND                        | No           |
| TCPD                | VIDPATATSVDLR   | Yes               | 453.25                 | 690.4                 | 13.80                       | 59.5                      | 20.7                | 14065                           | ND                        | ND                        | No           |
| TCPQ                | AVDDGVNTEFK     | Yes               | 533.26                 | 509.3                 | 10.08                       | 69.8                      | 35                  | 97505                           | ND                        | ND                        | No           |



**Table S5.** MRM assay of individual proteins.

| Protein<br>(_HUMAN) | Peptide        | MS/MS<br>spectrum | Precursor ion<br>(m/z) | Fragment ion<br>(m/z) | Retention time<br>(minutes) | Declustering<br>potential | Collision<br>energy | Area of<br>synthetic<br>peptide | Area in control<br>sample | Area in disease<br>sample | Interference                           |
|---------------------|----------------|-------------------|------------------------|-----------------------|-----------------------------|---------------------------|---------------------|---------------------------------|---------------------------|---------------------------|----------------------------------------|
| TCPQ                | AVDDGVNTFK     | Yes               | 533.26                 | 665.4                 | 10.08                       | 69.8                      | 26                  | 66984                           | ND                        | ND                        | No                                     |
| TCPQ                | AVDDGVNTFK     | Yes               | 533.26                 | 780.4                 | 10.08                       | 69.8                      | 26                  | 59999                           | ND                        | ND                        | No                                     |
| TCPQ                | AVDDGVNTFK     | Yes               | 533.26                 | 895.4                 | 10.08                       | 69.8                      | 26                  | 189903                          | ND                        | ND                        | No                                     |
| TCPQ                | DIDEVSSLLR     | Yes               | 573.8                  | 344.1                 | 17.79                       | 75                        | 27.7                | 213624                          | ND                        | ND                        | No                                     |
| TCPQ                | DIDEVSSLLR     | Yes               | 573.8                  | 674.4                 | 17.79                       | 75                        | 27.7                | 144309                          | ND                        | ND                        | No                                     |
| TCPQ                | DIDEVSSLLR     | Yes               | 573.8                  | 803.5                 | 17.79                       | 75                        | 30.7                | 99887                           | ND                        | ND                        | No                                     |
| TCPQ                | DIDEVSSLLR     | Yes               | 573.8                  | 918.5                 | 17.79                       | 75                        | 27.7                | 209111                          | ND                        | ND                        | No                                     |
| TCPQ                | LATNAAVTVLR    | Yes               | 564.84                 | 587.4                 | 13.05                       | 73.9                      | 36.4                | 22973                           | ND                        | ND                        | No                                     |
| TCPQ                | LATNAAVTVLR    | Yes               | 564.84                 | 658.4                 | 13.05                       | 73.9                      | 27.4                | 26785                           | ND                        | ND                        | No                                     |
| TCPQ                | LATNAAVTVLR    | Yes               | 564.84                 | 729.5                 | 13.05                       | 73.9                      | 36.4                | 12680                           | ND                        | ND                        | No                                     |
| TCPQ                | LATNAAVTVLR    | Yes               | 564.84                 | 843.5                 | 13.05                       | 73.9                      | 27.4                | 6195                            | ND                        | ND                        | No                                     |
| TCPQ                | LYAVHQEGNK     | Yes               | 386.87                 | 318.2                 | 6.79                        | 50.9                      | 23.3                | 49687                           | ND                        | ND                        | No                                     |
| TCPQ                | LYAVHQEGNK     | Yes               | 386.87                 | 348.2                 | 6.79                        | 50.9                      | 26.3                | 23699                           | ND                        | ND                        | No                                     |
| TCPQ                | LYAVHQEGNK     | Yes               | 386.87                 | 575.3                 | 6.79                        | 50.9                      | 20.3                | 45643                           | ND                        | ND                        | No                                     |
| TCPQ                | LYAVHQEGNK     | Yes               | 386.87                 | 811.4                 | 6.79                        | 50.9                      | 26.3                | 1085                            | ND                        | ND                        | No                                     |
| TCPQ                | NVGLDIEAEVPAVK | Yes               | 727.4                  | 271.1                 | 17.46                       | 94.8                      | 34.5                | 68541                           | 10688                     | 9515                      | Yes (Based on<br>Transition<br>Ratios) |
| TCPQ                | NVGLDIEAEVPAVK | Yes               | 727.4                  | 414.3                 | 17.46                       | 94.8                      | 40.5                | 146741                          | 64907                     | 82059                     | No                                     |
| TCPQ                | NVGLDIEAEVPAVK | Yes               | 727.4                  | 842.5                 | 17.46                       | 94.8                      | 34.5                | 39982                           | 23604                     | 37627                     | No                                     |
| TCPQ                | NVGLDIEAEVPAVK | Yes               | 727.4                  | 955.5                 | 17.46                       | 94.8                      | 34.5                | 10964                           | 2516                      | 5326                      | No                                     |
| TCPZ                | ALQFLEEVK      | Yes               | 538.8                  | 504.3                 | 19.33                       | 70.5                      | 26.2                | 1287068                         | ND                        | ND                        | No                                     |
| TCPZ                | ALQFLEEVK      | Yes               | 538.8                  | 617.4                 | 19.33                       | 70.5                      | 26.2                | 1418294                         | ND                        | ND                        | No                                     |
| TCPZ                | ALQFLEEVK      | Yes               | 538.8                  | 764.4                 | 19.33                       | 70.5                      | 26.2                | 3395708                         | ND                        | ND                        | No                                     |

**Table S5.** MRM assay of individual proteins.

| Protein<br>(_HUMAN) | Peptide           | MS/MS<br>spectrum | Precursor ion<br>(m/z) | Fragment ion<br>(m/z) | Retention time<br>(minutes) | Declustering<br>potential | Collision<br>energy | Area of<br>synthetic<br>peptide | Area in control<br>sample | Area in disease<br>sample | Interference |
|---------------------|-------------------|-------------------|------------------------|-----------------------|-----------------------------|---------------------------|---------------------|---------------------------------|---------------------------|---------------------------|--------------|
| TCPZ                | ALQFLEEVK         | Yes               | 538.8                  | 892.5                 | 19.33                       | 70.5                      | 26.2                | 2214371                         | ND                        | ND                        | No           |
| TCPZ                | AQAALAVNISAAR     | Yes               | 628.36                 | 730.4                 | 14.61                       | 82.1                      | 30.1                | 466648                          | ND                        | ND                        | No           |
| TCPZ                | AQAALAVNISAAR     | Yes               | 628.36                 | 801.5                 | 14.61                       | 82.1                      | 30.1                | 821451                          | ND                        | ND                        | No           |
| TCPZ                | AQAALAVNISAAR     | Yes               | 628.36                 | 914.5                 | 14.61                       | 82.1                      | 33.1                | 369300                          | ND                        | ND                        | No           |
| TCPZ                | AQAALAVNISAAR     | Yes               | 628.36                 | 985.6                 | 14.61                       | 82.1                      | 33.1                | 228924                          | ND                        | ND                        | No           |
| TCPZ                | AQLGVQAFADALLIIPK | Yes               | 884.52                 | 313.2                 | 25.23                       | 115.1                     | 41.4                | ND                              | ND                        | ND                        | No           |
| TCPZ                | AQLGVQAFADALLIIPK | Yes               | 884.52                 | 597.3                 | 25.23                       | 115.1                     | 38.4                | ND                              | ND                        | ND                        | No           |
| TCPZ                | AQLGVQAFADALLIIPK | Yes               | 884.52                 | 668.4                 | 25.23                       | 115.1                     | 41.4                | ND                              | ND                        | ND                        | No           |
| TCPZ                | AQLGVQAFADALLIIPK | Yes               | 884.52                 | 953.6                 | 25.23                       | 115.1                     | 41.4                | ND                              | ND                        | ND                        | No           |
| TCPZ                | GIDPFSLDALSK      | Yes               | 631.84                 | 286.1                 | 21.71                       | 82.5                      | 27.3                | 2840246                         | ND                        | ND                        | No           |
| TCPZ                | GIDPFSLDALSK      | Yes               | 631.84                 | 733.4                 | 21.71                       | 82.5                      | 39.3                | 1338376                         | ND                        | ND                        | No           |
| TCPZ                | GIDPFSLDALSK      | Yes               | 631.84                 | 880.5                 | 21.71                       | 82.5                      | 39.3                | 686786                          | ND                        | ND                        | No           |
| TCPZ                | GIDPFSLDALSK      | Yes               | 631.84                 | 977.5                 | 21.71                       | 82.5                      | 27.3                | 1332319                         | ND                        | ND                        | No           |
| TCPZ                | GLVLDHGAR         | Yes               | 313.18                 | 440.2                 | 10.19                       | 41.4                      | 22.5                | 1804958                         | ND                        | ND                        | No           |
| TCPZ                | GLVLDHGAR         | Yes               | 313.18                 | 555.3                 | 10.19                       | 41.4                      | 19.5                | 2085697                         | ND                        | ND                        | No           |
| TCPZ                | GLVLDHGAR         | Yes               | 313.18                 | 668.3                 | 10.19                       | 41.4                      | 22.5                | 6618                            | ND                        | ND                        | No           |
| TCPZ                | QADLYISEGLHPR     | Yes               | 500.26                 | 272.2                 | 15.44                       | 65.5                      | 29.1                | 467756                          | ND                        | ND                        | No           |
| TCPZ                | QADLYISEGLHPR     | Yes               | 500.26                 | 409.2                 | 15.44                       | 65.5                      | 32.1                | 151277                          | ND                        | ND                        | No           |
| TCPZ                | QADLYISEGLHPR     | Yes               | 500.26                 | 708.4                 | 15.44                       | 65.5                      | 29.1                | 132568                          | ND                        | ND                        | No           |
| TCPZ                | QADLYISEGLHPR     | Yes               | 500.26                 | 795.4                 | 15.44                       | 65.5                      | 29.1                | 585195                          | ND                        | ND                        | No           |
| TCPZ                | TEVNSGFFYK        | Yes               | 596.29                 | 661.3                 | 16.18                       | 77.9                      | 28.7                | 334620                          | ND                        | ND                        | No           |
| TCPZ                | TEVNSGFFYK        | Yes               | 596.29                 | 748.4                 | 16.18                       | 77.9                      | 28.7                | 624244                          | ND                        | ND                        | No           |
| TCPZ                | TEVNSGFFYK        | Yes               | 596.29                 | 862.4                 | 16.18                       | 77.9                      | 28.7                | 1592373                         | ND                        | ND                        | No           |

**Table S5.** MRM assay of individual proteins.

| Protein<br>(_HUMAN) | Peptide                    | MS/MS<br>spectrum | Precursor ion<br>(m/z) | Fragment ion<br>(m/z) | Retention time<br>(minutes) | Declustering<br>potential | Collision<br>energy | Area of<br>synthetic<br>peptide | Area in control<br>sample | Area in disease<br>sample | Interference |
|---------------------|----------------------------|-------------------|------------------------|-----------------------|-----------------------------|---------------------------|---------------------|---------------------------------|---------------------------|---------------------------|--------------|
| TCPZ                | TEVNSGFFYK                 | Yes               | 596.29                 | 961.5                 | 16.18                       | 77.9                      | 28.7                | 1594788                         | ND                        | ND                        | No           |
| TCPZ                | VATAQDDITGDGTTSNVLIIGELLK  | No                |                        |                       |                             |                           |                     |                                 |                           |                           |              |
| TCPZ                | VHAELADVLTEAVVDSILAIAK     | Yes               | 736.08                 | 331.2                 | 25.04                       | 96                        | 38.1                | ND                              | ND                        | ND                        | No           |
| TCPZ                | VHAELADVLTEAVVDSILAIAK     | Yes               | 736.08                 | 759.5                 | 25.04                       | 96                        | 35.1                | ND                              | ND                        | ND                        | No           |
| TCPZ                | VHAELADVLTEAVVDSILAIAK     | Yes               | 736.08                 | 858.5                 | 25.04                       | 96                        | 38.1                | ND                              | ND                        | ND                        | No           |
| TCPZ                | VHAELADVLTEAVVDSILAIAK     | Yes               | 736.08                 | 957.6                 | 25.04                       | 96                        | 32.1                | ND                              | ND                        | ND                        | No           |
| TCPZ                | VLAQNSGFDLQETLVK           | Yes               | 881.47                 | 460.3                 | 19.20                       | 114.7                     | 50.3                | 42219                           | ND                        | ND                        | No           |
| TCPZ                | VLAQNSGFDLQETLVK           | Yes               | 881.47                 | 589.4                 | 19.20                       | 114.7                     | 47.3                | 26547                           | ND                        | ND                        | No           |
| TCPZ                | VLAQNSGFDLQETLVK           | Yes               | 881.47                 | 717.4                 | 19.20                       | 114.7                     | 50.3                | 25754                           | ND                        | ND                        | No           |
| TCPZ                | VLAQNSGFDLQETLVK           | Yes               | 881.47                 | 945.5                 | 19.20                       | 114.7                     | 50.3                | 26754                           | ND                        | ND                        | No           |
| TDRD3               | HFNVNTDYQNPVR              | Yes               | 535.26                 | 371.2                 | 11.27                       | 70                        | 24.8                | 25367                           | ND                        | ND                        | No           |
| TDRD3               | HFNVNTDYQNPVR              | Yes               | 535.26                 | 485.3                 | 11.27                       | 70                        | 24.8                | 34956                           | ND                        | ND                        | No           |
| TDRD3               | HFNVNTDYQNPVR              | Yes               | 535.26                 | 498.2                 | 11.27                       | 70                        | 33.8                | 12808                           | ND                        | ND                        | No           |
| TDRD3               | HFNVNTDYQNPVR              | Yes               | 535.26                 | 613.3                 | 11.27                       | 70                        | 24.8                | 9120                            | ND                        | ND                        | No           |
| TDRD3               | SEDEEDLGNARPSAPSTLFDLFLESK | Yes               | 918.76                 | 332.1                 | 23.36                       | 119.5                     | 44.4                | 8520                            | 27267                     | 22933                     | No           |
| TDRD3               | SEDEEDLGNARPSAPSTLFDLFLESK | Yes               | 918.76                 | 461.2                 | 23.36                       | 119.5                     | 44.4                | 4408                            | 10764                     | ND                        | No           |
| TDRD3               | SEDEEDLGNARPSAPSTLFDLFLESK | Yes               | 918.76                 | 705.2                 | 23.36                       | 119.5                     | 44.4                | 3731                            | ND                        | 9938                      | No           |
| TDRD3               | SEDEEDLGNARPSAPSTLFDLFLESK | Yes               | 918.76                 | 885.4                 | 23.36                       | 119.5                     | 50.4                | 3157                            | 10043                     | 12682                     | No           |
| TDRD3               | SNIGTEGGPPPFVVPFGQK        | Yes               | 914.97                 | 332.2                 | 17.44                       | 119                       | 48.8                | 38221                           | ND                        | ND                        | No           |
| TDRD3               | SNIGTEGGPPPFVVPFGQK        | Yes               | 914.97                 | 576.3                 | 17.44                       | 119                       | 42.8                | 266334                          | ND                        | ND                        | No           |
| TDRD3               | SNIGTEGGPPPFVVPFGQK        | Yes               | 914.97                 | 602.3                 | 17.44                       | 119                       | 42.8                | 13572                           | ND                        | ND                        | No           |
| TDRD3               | SNIGTEGGPPPFVVPFGQK        | Yes               | 914.97                 | 716.3                 | 17.44                       | 119                       | 39.8                | 23476                           | ND                        | ND                        | No           |
| TDRD3               | SVLEGSGLPR                 | Yes               | 338.86                 | 272.2                 | 10.91                       | 44.7                      | 17.8                | 1027                            | ND                        | ND                        | No           |

**Table S5.** MRM assay of individual proteins.

| Protein<br>(_HUMAN) | Peptide                   | MS/MS<br>spectrum | Precursor ion<br>(m/z) | Fragment ion<br>(m/z) | Retention time<br>(minutes) | Declustering<br>potential | Collision<br>energy | Area of<br>synthetic<br>peptide | Area in control<br>sample | Area in disease<br>sample | Interference                       |
|---------------------|---------------------------|-------------------|------------------------|-----------------------|-----------------------------|---------------------------|---------------------|---------------------------------|---------------------------|---------------------------|------------------------------------|
| TDRD3               | SVLEGSGLPR                | Yes               | 338.86                 | 300.2                 | 10.91                       | 44.7                      | 14.8                | 2565                            | ND                        | ND                        | No                                 |
| TDRD3               | SVLEGSGLPR                | Yes               | 338.86                 | 442.3                 | 10.91                       | 44.7                      | 14.8                | ND                              | ND                        | ND                        | No                                 |
| TDRD3               | SVLEGSGLPR                | Yes               | 338.86                 | 586.3                 | 10.91                       | 44.7                      | 11.8                | ND                              | ND                        | ND                        | No                                 |
| TDRD3               | TAAIAEVAK                 | Yes               | 437.26                 | 517.3                 | 8.58                        | 57.4                      | 21.7                | 149124                          | ND                        | ND                        | No                                 |
| TDRD3               | TAAIAEVAK                 | Yes               | 437.26                 | 630.4                 | 8.58                        | 57.4                      | 21.7                | 89489                           | ND                        | ND                        | No                                 |
| TDRD3               | TAAIAEVAK                 | Yes               | 437.26                 | 701.4                 | 8.58                        | 57.4                      | 21.7                | 282892                          | ND                        | ND                        | No                                 |
| TDRD3               | TAAIAEVAK                 | Yes               | 437.26                 | 772.5                 | 8.58                        | 57.4                      | 21.7                | 28546                           | ND                        | ND                        | No                                 |
| TENA                | AVDIPGLEAATPYR            | Yes               | 491.6                  | 435.2                 | 17.12                       | 64.4                      | 22.6                | 29687                           | ND                        | 5261                      | No                                 |
| TENA                | AVDIPGLEAATPYR            | Yes               | 491.6                  | 536.3                 | 17.12                       | 64.4                      | 22.6                | 26807                           | ND                        | 6948                      | No                                 |
| TENA                | AVDIPGLEAATPYR            | Yes               | 491.6                  | 607.3                 | 17.12                       | 64.4                      | 22.6                | 18456                           | ND                        | 1582                      | No                                 |
| TENA                | AVDIPGLEAATPYR            | Yes               | 491.6                  | 678.4                 | 17.12                       | 64.4                      | 31.6                | 18339                           | ND                        | 1568                      | No                                 |
| TENA                | GLEPGQEYNVLLTAEK          | Yes               | 880.96                 | 448.2                 | 17.44                       | 114.6                     | 50.3                | 85558                           | 9831                      | 12872                     | No                                 |
| TENA                | GLEPGQEYNVLLTAEK          | Yes               | 880.96                 | 561.3                 | 17.44                       | 114.6                     | 50.3                | 42445                           | 6143                      | 13988                     | No                                 |
| TENA                | GLEPGQEYNVLLTAEK          | Yes               | 880.96                 | 582.3                 | 17.44                       | 114.6                     | 41.3                | 11901                           | ND                        | ND                        | No                                 |
| TENA                | GLEPGQEYNVLLTAEK          | Yes               | 880.96                 | 674.4                 | 17.44                       | 114.6                     | 50.3                | 43788                           | ND                        | 8609                      | No                                 |
| TENA                | TAHISGLPPSTDFIVYLSGLAPSIR | Yes               | 871.47                 | 472.3                 | 24.58                       | 113.4                     | 39                  | 52609                           | 10121                     | 11526                     | No                                 |
| TENA                | TAHISGLPPSTDFIVYLSGLAPSIR | Yes               | 871.47                 | 680.4                 | 24.58                       | 113.4                     | 51                  | 22206                           | 3170                      | 5391                      | No                                 |
| TENA                | TAHISGLPPSTDFIVYLSGLAPSIR | Yes               | 871.47                 | 713.4                 | 24.58                       | 113.4                     | 42                  | 25260                           | 6062                      | 9159                      | No                                 |
| TENA                | TAHISGLPPSTDFIVYLSGLAPSIR | Yes               | 871.47                 | 800.5                 | 24.58                       | 113.4                     | 39                  | 34316                           | 7009                      | 6605                      | No                                 |
| TENA                | TVSGNTVEYALTDLEPATEYTLR   | Yes               | 848.42                 | 552.3                 | 22.04                       | 110.4                     | 43.8                | 2874                            | 8598                      | 2966                      | No                                 |
| TENA                | TVSGNTVEYALTDLEPATEYTLR   | Yes               | 848.42                 | 782.4                 | 22.04                       | 110.4                     | 37.8                | ND                              | ND                        | ND                        | Yes (Based on<br>Manual<br>Review) |
| TENA                | TVSGNTVEYALTDLEPATEYTLR   | Yes               | 848.42                 | 950.5                 | 22.04                       | 110.4                     | 40.8                | 18295                           | 39889                     | 41543                     | No                                 |

**Table S5.** MRM assay of individual proteins.

| Protein<br>(_HUMAN) | Peptide                 | MS/MS<br>spectrum | Precursor ion<br>(m/z) | Fragment ion<br>(m/z) | Retention time<br>(minutes) | Declustering<br>potential | Collision<br>energy | Area of<br>synthetic<br>peptide | Area in control<br>sample | Area in disease<br>sample | Interference |
|---------------------|-------------------------|-------------------|------------------------|-----------------------|-----------------------------|---------------------------|---------------------|---------------------------------|---------------------------|---------------------------|--------------|
| TENA                | TVSGNTVEYALTDLEPATEYTLR | Yes               | 848.42                 | 951.4                 | 22.04                       | 110.4                     | 37.8                | 4002                            | 9202                      | 12912                     | No           |
| TENA                | YAPISGGDHAEVDVPK        | Yes               | 552.27                 | 332.2                 | 11.11                       | 72.2                      | 25.7                | 12662                           | ND                        | ND                        | No           |
| TENA                | YAPISGGDHAEVDVPK        | Yes               | 552.27                 | 343.2                 | 11.11                       | 72.2                      | 31.7                | 54253                           | ND                        | ND                        | No           |
| TENA                | YAPISGGDHAEVDVPK        | Yes               | 552.27                 | 686.4                 | 11.11                       | 72.2                      | 34.7                | 5413                            | ND                        | ND                        | No           |
| TENA                | YAPISGGDHAEVDVPK        | Yes               | 552.27                 | 757.4                 | 11.11                       | 72.2                      | 34.7                | 9262                            | ND                        | ND                        | No           |
| TENX                | DAQGQPQAVPVSGDLR        | Yes               | 819.42                 | 372.2                 | 11.04                       | 106.7                     | 44.6                | 43116                           | 23755                     | 24599                     | No           |
| TENX                | DAQGQPQAVPVSGDLR        | Yes               | 819.42                 | 500.2                 | 11.04                       | 106.7                     | 35.6                | 62767                           | 31297                     | 33797                     | No           |
| TENX                | DAQGQPQAVPVSGDLR        | Yes               | 819.42                 | 743.4                 | 11.04                       | 106.7                     | 38.6                | 110974                          | 34940                     | 50256                     | No           |
| TENX                | DAQGQPQAVPVSGDLR        | Yes               | 819.42                 | 895.4                 | 11.04                       | 106.7                     | 38.6                | 17664                           | 6818                      | 5108                      | No           |
| TENX                | GFESEPLTGFLTTPDGPTQLR   | No                |                        |                       |                             |                           |                     |                                 |                           |                           |              |
| TENX                | VPGHEDGVTISGLEPDHK      | Yes               | 629.65                 | 496.3                 | 11.93                       | 82.2                      | 38.7                | 41209                           | ND                        | ND                        | No           |
| TENX                | VPGHEDGVTISGLEPDHK      | Yes               | 629.65                 | 795.4                 | 11.93                       | 82.2                      | 29.7                | 24337                           | ND                        | ND                        | No           |
| TENX                | VPGHEDGVTISGLEPDHK      | Yes               | 629.65                 | 882.4                 | 11.93                       | 82.2                      | 32.7                | 20569                           | ND                        | ND                        | No           |
| TENX                | VPGHEDGVTISGLEPDHK      | Yes               | 629.65                 | 892.4                 | 11.93                       | 82.2                      | 32.7                | 9729                            | ND                        | ND                        | No           |
| TENX                | VSYQLADGGEPQSVQVDGQAR   | Yes               | 1102.53                | 431.2                 | 12.39                       | 143.2                     | 60                  | 8504                            | 11556                     | 4316                      | No           |
| TENX                | VSYQLADGGEPQSVQVDGQAR   | Yes               | 1102.53                | 546.3                 | 12.39                       | 143.2                     | 48                  | 6058                            | 6190                      | 7375                      | No           |
| TENX                | VSYQLADGGEPQSVQVDGQAR   | Yes               | 1102.53                | 645.3                 | 12.39                       | 143.2                     | 51                  | 3491                            | ND                        | ND                        | No           |
| TENX                | VSYQLADGGEPQSVQVDGQAR   | Yes               | 1102.53                | 773.4                 | 12.39                       | 143.2                     | 51                  | 6795                            | 8202                      | 7542                      | No           |
| TENX                | YEVTVSVR                | Yes               | 526.29                 | 460.3                 | 11.99                       | 68.9                      | 34.7                | 8772                            | 65291                     | 64723                     | No           |
| TENX                | YEVTVSVR                | Yes               | 526.29                 | 559.4                 | 11.99                       | 68.9                      | 22.7                | 4120                            | 49441                     | 42553                     | No           |
| TENX                | YEVTVSVR                | Yes               | 526.29                 | 660.4                 | 11.99                       | 68.9                      | 25.7                | 11271                           | 103103                    | 127088                    | No           |
| TENX                | YEVTVSVR                | Yes               | 526.29                 | 759.5                 | 11.99                       | 68.9                      | 22.7                | 16516                           | 154180                    | 174610                    | No           |
| TERA                | GILLYGPPGTGK            | Yes               | 586.84                 | 284.2                 | 17.01                       | 76.7                      | 28.3                | 4498979                         | ND                        | ND                        | No           |

**Table S5.** MRM assay of individual proteins.

| Protein<br>(_HUMAN) | Peptide             | MS/MS<br>spectrum | Precursor ion<br>(m/z) | Fragment ion<br>(m/z) | Retention time<br>(minutes) | Declustering<br>potential | Collision<br>energy | Area of<br>synthetic<br>peptide | Area in control<br>sample | Area in disease<br>sample | Interference |
|---------------------|---------------------|-------------------|------------------------|-----------------------|-----------------------------|---------------------------|---------------------|---------------------------------|---------------------------|---------------------------|--------------|
| TERA                | GILLYGPPGTGK        | Yes               | 586.84                 | 397.3                 | 17.01                       | 76.7                      | 25.3                | 2054979                         | ND                        | ND                        | No           |
| TERA                | GILLYGPPGTGK        | Yes               | 586.84                 | 556.3                 | 17.01                       | 76.7                      | 37.3                | 2704608                         | ND                        | ND                        | No           |
| TERA                | GILLYGPPGTGK        | Yes               | 586.84                 | 776.4                 | 17.01                       | 76.7                      | 28.3                | 3607605                         | ND                        | ND                        | No           |
| TERA                | GPELLTMWFGESEANVR   | Yes               | 968.47                 | 510.3                 | 25.12                       | 125.9                     | 42.1                | 32903                           | ND                        | ND                        | No           |
| TERA                | GPELLTMWFGESEANVR   | Yes               | 968.47                 | 611.3                 | 25.12                       | 125.9                     | 42.1                | 27418                           | ND                        | ND                        | No           |
| TERA                | GPELLTMWFGESEANVR   | Yes               | 968.47                 | 675.3                 | 25.12                       | 125.9                     | 42.1                | 16781                           | ND                        | ND                        | No           |
| TERA                | GPELLTMWFGESEANVR   | Yes               | 968.47                 | 861.4                 | 25.12                       | 125.9                     | 51.1                | 52118                           | ND                        | ND                        | No           |
| TERA                | IVSQLLTLMDGLK       | Yes               | 715.92                 | 563.3                 | 25.12                       | 93.4                      | 31                  | 73621                           | ND                        | ND                        | No           |
| TERA                | IVSQLLTLMDGLK       | Yes               | 715.92                 | 676.4                 | 25.12                       | 93.4                      | 31                  | 66108                           | ND                        | ND                        | No           |
| TERA                | IVSQLLTLMDGLK       | Yes               | 715.92                 | 777.4                 | 25.12                       | 93.4                      | 34                  | 153418                          | ND                        | ND                        | No           |
| TERA                | IVSQLLTLMDGLK       | Yes               | 715.92                 | 890.5                 | 25.12                       | 93.4                      | 34                  | 163928                          | ND                        | ND                        | No           |
| TERA                | LDQLIYIPLPDEK       | Yes               | 778.93                 | 470.3                 | 22.52                       | 101.5                     | 36.8                | 207753                          | ND                        | ND                        | No           |
| TERA                | LDQLIYIPLPDEK       | Yes               | 778.93                 | 698.4                 | 22.52                       | 101.5                     | 36.8                | 254852                          | ND                        | ND                        | No           |
| TERA                | LDQLIYIPLPDEK       | Yes               | 778.93                 | 811.5                 | 22.52                       | 101.5                     | 33.8                | 99288                           | ND                        | ND                        | No           |
| TERA                | LDQLIYIPLPDEK       | Yes               | 778.93                 | 974.5                 | 22.52                       | 101.5                     | 36.8                | 152145                          | ND                        | ND                        | No           |
| TERA                | LIVDEAINEDNSVVLSQPK | No                |                        |                       |                             |                           |                     |                                 |                           |                           |              |
| TERA                | MDELQLFR            | Yes               | 526.27                 | 563.3                 | 20.14                       | 68.9                      | 25.7                | 1497727                         | ND                        | ND                        | No           |
| TERA                | MDELQLFR            | Yes               | 526.27                 | 676.4                 | 20.14                       | 68.9                      | 28.7                | 764992                          | ND                        | ND                        | No           |
| TERA                | MDELQLFR            | Yes               | 526.27                 | 805.5                 | 20.14                       | 68.9                      | 28.7                | 1144786                         | ND                        | ND                        | No           |
| TERA                | MDELQLFR            | Yes               | 526.27                 | 920.5                 | 20.14                       | 68.9                      | 28.7                | 931093                          | ND                        | ND                        | No           |
| TERA                | NAPAIIFIDELDAIAPK   | Yes               | 906                    | 283.1                 | 25.23                       | 117.9                     | 51.4                | 186563                          | ND                        | ND                        | No           |
| TERA                | NAPAIIFIDELDAIAPK   | Yes               | 906                    | 315.2                 | 25.23                       | 117.9                     | 39.4                | 474413                          | ND                        | ND                        | No           |
| TERA                | NAPAIIFIDELDAIAPK   | Yes               | 906                    | 467.3                 | 25.23                       | 117.9                     | 39.4                | 396688                          | ND                        | ND                        | No           |

**Table S5.** MRM assay of individual proteins.

| Protein<br>(_HUMAN) | Peptide               | MS/MS<br>spectrum | Precursor ion<br>(m/z) | Fragment ion<br>(m/z) | Retention time<br>(minutes) | Decustering<br>potential | Collision<br>energy | Area of<br>synthetic<br>peptide | Area in control<br>sample | Area in disease<br>sample | Interference |
|---------------------|-----------------------|-------------------|------------------------|-----------------------|-----------------------------|--------------------------|---------------------|---------------------------------|---------------------------|---------------------------|--------------|
| TERA                | NAPAIIFIDELDAIAPK     | Yes               | 906                    | 971.5                 | 25.23                       | 117.9                    | 45.4                | 161600                          | ND                        | ND                        | No           |
| TERA                | VINQILTEMDGMSTK       | Yes               | 840.42                 | 455.3                 | 20.73                       | 109.4                    | 36.5                | 42351                           | ND                        | ND                        | No           |
| TERA                | VINQILTEMDGMSTK       | Yes               | 840.42                 | 523.3                 | 20.73                       | 109.4                    | 48.5                | 32057                           | ND                        | ND                        | No           |
| TERA                | VINQILTEMDGMSTK       | Yes               | 840.42                 | 568.3                 | 20.73                       | 109.4                    | 36.5                | 43772                           | ND                        | ND                        | No           |
| TERA                | VINQILTEMDGMSTK       | Yes               | 840.42                 | 999.4                 | 20.73                       | 109.4                    | 45.5                | 25215                           | ND                        | ND                        | No           |
| TERA                | WALSQSNPSALR          | Yes               | 665.35                 | 543.3                 | 15.70                       | 86.8                     | 40.8                | 236156                          | ND                        | ND                        | No           |
| TERA                | WALSQSNPSALR          | Yes               | 665.35                 | 744.4                 | 15.70                       | 86.8                     | 34.8                | 140646                          | ND                        | ND                        | No           |
| TERA                | WALSQSNPSALR          | Yes               | 665.35                 | 872.5                 | 15.70                       | 86.8                     | 40.8                | 108706                          | ND                        | ND                        | No           |
| TERA                | WALSQSNPSALR          | Yes               | 665.35                 | 959.5                 | 15.70                       | 86.8                     | 37.8                | 198078                          | ND                        | ND                        | No           |
| TETN                | GGTLSTPQTGSENDALYEYLR | Yes               | 758.03                 | 451.3                 | 18.32                       | 98.8                     | 45.2                | 26070                           | 57488                     | 127897                    | No           |
| TETN                | GGTLSTPQTGSENDALYEYLR | Yes               | 758.03                 | 580.3                 | 18.32                       | 98.8                     | 33.2                | 27615                           | 78447                     | 148246                    | No           |
| TETN                | GGTLSTPQTGSENDALYEYLR | Yes               | 758.03                 | 856.5                 | 18.32                       | 98.8                     | 36.2                | 24411                           | 57916                     | 121498                    | No           |
| TETN                | GGTLSTPQTGSENDALYEYLR | Yes               | 758.03                 | 927.5                 | 18.32                       | 98.8                     | 42.2                | 8539                            | 26011                     | 35394                     | No           |
| TETN                | LDTLAQEVALLK          | Yes               | 657.39                 | 330.2                 | 20.73                       | 85.8                     | 31.4                | 288305                          | 108076                    | 112901                    | No           |
| TETN                | LDTLAQEVALLK          | Yes               | 657.39                 | 543.4                 | 20.73                       | 85.8                     | 28.4                | 166789                          | 54874                     | 67833                     | No           |
| TETN                | LDTLAQEVALLK          | Yes               | 657.39                 | 800.5                 | 20.73                       | 85.8                     | 31.4                | 234436                          | 72253                     | 82161                     | No           |
| TETN                | LDTLAQEVALLK          | Yes               | 657.39                 | 871.5                 | 20.73                       | 85.8                     | 31.4                | 327551                          | 117259                    | 116678                    | No           |
| TETN                | NWETEITAQPDGGK        | Yes               | 773.36                 | 301.1                 | 14.20                       | 100.8                    | 39.5                | 39847                           | 16015                     | 16039                     | No           |
| TETN                | NWETEITAQPDGGK        | Yes               | 773.36                 | 430.2                 | 14.20                       | 100.8                    | 36.5                | 22521                           | ND                        | ND                        | No           |
| TETN                | NWETEITAQPDGGK        | Yes               | 773.36                 | 473.2                 | 14.20                       | 100.8                    | 45.5                | 71276                           | 16226                     | 20415                     | No           |
| TETN                | NWETEITAQPDGGK        | Yes               | 773.36                 | 886.5                 | 14.20                       | 100.8                    | 36.5                | 7687                            | ND                        | ND                        | No           |
| TF                  | DLIYTLYYWK            | Yes               | 689.36                 | 496.3                 | 23.40                       | 89.9                     | 41.8                | 29662                           | ND                        | ND                        | No           |
| TF                  | DLIYTLYYWK            | Yes               | 689.36                 | 659.3                 | 23.40                       | 89.9                     | 29.8                | 19663                           | ND                        | ND                        | No           |

**Table S5.** MRM assay of individual proteins.

| Protein<br>(_HUMAN) | Peptide               | MS/MS<br>spectrum | Precursor ion<br>(m/z) | Fragment ion<br>(m/z) | Retention time<br>(minutes) | Declustering<br>potential | Collision<br>energy | Area of<br>synthetic<br>peptide | Area in control<br>sample | Area in disease<br>sample | Interference                           |
|---------------------|-----------------------|-------------------|------------------------|-----------------------|-----------------------------|---------------------------|---------------------|---------------------------------|---------------------------|---------------------------|----------------------------------------|
| TF                  | DLIYTLYYWK            | Yes               | 689.36                 | 772.4                 | 23.40                       | 89.9                      | 29.8                | 15927                           | ND                        | ND                        | No                                     |
| TF                  | DLIYTLYYWK            | Yes               | 689.36                 | 873.5                 | 23.40                       | 89.9                      | 29.8                | 41176                           | ND                        | ND                        | No                                     |
| TF                  | ENSPLNVS              | No                |                        |                       |                             |                           |                     |                                 |                           |                           |                                        |
| TF                  | TILEWEPKPVNQVYTVQISTK | No                |                        |                       |                             |                           |                     |                                 |                           |                           |                                        |
| TF                  | TNTNEFLIDVDK          | Yes               | 704.85                 | 262.1                 | 16.41                       | 91.9                      | 42.5                | 30695                           | ND                        | ND                        | No                                     |
| TF                  | TNTNEFLIDVDK          | Yes               | 704.85                 | 476.2                 | 16.41                       | 91.9                      | 33.5                | 42009                           | ND                        | ND                        | No                                     |
| TF                  | TNTNEFLIDVDK          | Yes               | 704.85                 | 589.3                 | 16.41                       | 91.9                      | 36.5                | 26405                           | ND                        | ND                        | No                                     |
| TF                  | TNTNEFLIDVDK          | Yes               | 704.85                 | 978.5                 | 16.41                       | 91.9                      | 33.5                | 6032                            | ND                        | ND                        | No                                     |
| TF                  | VNVTVEDER             | Yes               | 530.77                 | 304.2                 | 8.33                        | 69.5                      | 31.9                | 19286                           | ND                        | ND                        | No                                     |
| TF                  | VNVTVEDER             | Yes               | 530.77                 | 647.3                 | 8.33                        | 69.5                      | 31.9                | 9265                            | ND                        | ND                        | No                                     |
| TF                  | VNVTVEDER             | Yes               | 530.77                 | 748.3                 | 8.33                        | 69.5                      | 25.9                | 11384                           | ND                        | ND                        | No                                     |
| TF                  | VNVTVEDER             | Yes               | 530.77                 | 847.4                 | 8.33                        | 69.5                      | 25.9                | 8832                            | ND                        | ND                        | No                                     |
| TFR1                | GFVEPDHYVVVGAQR       | Yes               | 558.29                 | 431.2                 | 13.84                       | 73                        | 26                  | 49644                           | ND                        | ND                        | No                                     |
| TFR1                | GFVEPDHYVVVGAQR       | Yes               | 558.29                 | 629.4                 | 13.84                       | 73                        | 35                  | 41201                           | ND                        | ND                        | No                                     |
| TFR1                | GFVEPDHYVVVGAQR       | Yes               | 558.29                 | 728.4                 | 13.84                       | 73                        | 35                  | 44628                           | ND                        | ND                        | No                                     |
| TFR1                | GFVEPDHYVVVGAQR       | Yes               | 558.29                 | 891.5                 | 13.84                       | 73                        | 35                  | 19282                           | ND                        | ND                        | No                                     |
| TFR1                | LTTDFGNAEK            | Yes               | 548.27                 | 518.3                 | 10.05                       | 71.7                      | 35.6                | 137300                          | ND                        | ND                        | No                                     |
| TFR1                | LTTDFGNAEK            | Yes               | 548.27                 | 665.3                 | 10.05                       | 71.7                      | 35.6                | 173153                          | ND                        | ND                        | No                                     |
| TFR1                | LTTDFGNAEK            | Yes               | 548.27                 | 780.4                 | 10.05                       | 71.7                      | 26.6                | 114665                          | ND                        | ND                        | No                                     |
| TFR1                | LTTDFGNAEK            | Yes               | 548.27                 | 881.4                 | 10.05                       | 71.7                      | 26.6                | 191020                          | ND                        | ND                        | No                                     |
| TFR1                | LTVSNVLK              | Yes               | 437.27                 | 473.3                 | 13.35                       | 57.4                      | 27.7                | 22190                           | ND                        | 14654                     | Yes (Based on<br>Transition<br>Ratios) |
| TFR1                | LTVSNVLK              | Yes               | 437.27                 | 560.3                 | 13.35                       | 57.4                      | 21.7                | 106673                          | ND                        | 7404                      | No                                     |



**Table S5.** MRM assay of individual proteins.

| Protein<br>(_HUMAN) | Peptide          | MS/MS<br>spectrum | Precursor ion<br>(m/z) | Fragment ion<br>(m/z) | Retention time<br>(minutes) | Declustering<br>potential | Collision<br>energy | Area of<br>synthetic<br>peptide | Area in control<br>sample | Area in disease<br>sample | Interference                           |
|---------------------|------------------|-------------------|------------------------|-----------------------|-----------------------------|---------------------------|---------------------|---------------------------------|---------------------------|---------------------------|----------------------------------------|
| TFR1                | LTVSNVLK         | Yes               | 437.27                 | 659.4                 | 13.35                       | 57.4                      | 21.7                | 204610                          | ND                        | 4608                      | No                                     |
| TFR1                | LTVSNVLK         | Yes               | 437.27                 | 760.5                 | 13.35                       | 57.4                      | 21.7                | 105968                          | ND                        | 1904                      | No                                     |
| TFR1                | SAFSNLFGGEPLSYTR | Yes               | 873.43                 | 620.3                 | 21.91                       | 113.7                     | 40.9                | 105074                          | ND                        | ND                        | No                                     |
| TFR1                | SAFSNLFGGEPLSYTR | Yes               | 873.43                 | 736.4                 | 21.91                       | 113.7                     | 40.9                | 179977                          | ND                        | ND                        | No                                     |
| TFR1                | SAFSNLFGGEPLSYTR | Yes               | 873.43                 | 922.5                 | 21.91                       | 113.7                     | 37.9                | 60848                           | ND                        | ND                        | No                                     |
| TFR1                | SAFSNLFGGEPLSYTR | Yes               | 873.43                 | 979.5                 | 21.91                       | 113.7                     | 40.9                | 225397                          | ND                        | ND                        | No                                     |
| TFR1                | SSGLPNIPVQTISR   | Yes               | 734.91                 | 345.2                 | 15.38                       | 95.8                      | 34.8                | 173063                          | 23359                     | 13151                     | No                                     |
| TFR1                | SSGLPNIPVQTISR   | Yes               | 734.91                 | 476.3                 | 15.38                       | 95.8                      | 43.8                | 20532                           | 941                       | ND                        | Yes (Based on<br>Transition<br>Ratios) |
| TFR1                | SSGLPNIPVQTISR   | Yes               | 734.91                 | 669.4                 | 15.38                       | 95.8                      | 34.8                | 81733                           | 10189                     | 10855                     | No                                     |
| TFR1                | SSGLPNIPVQTISR   | Yes               | 734.91                 | 800.5                 | 15.38                       | 95.8                      | 37.8                | 445547                          | 71744                     | 59224                     | No                                     |
| TGFA                | HEKPSALLK        | Yes               | 341.54                 | 267.1                 | 7.42                        | 45.1                      | 24                  | 243729                          | ND                        | 22130                     | No                                     |
| TGFA                | HEKPSALLK        | Yes               | 341.54                 | 373.3                 | 7.42                        | 45.1                      | 21                  | 82377                           | ND                        | 6261                      | No                                     |
| TGFA                | HEKPSALLK        | Yes               | 341.54                 | 531.4                 | 7.42                        | 45.1                      | 21                  | 34805                           | ND                        | 2971                      | No                                     |
| TGFA                | HEKPSALLK        | Yes               | 341.54                 | 763.4                 | 7.42                        | 45.1                      | 24                  | ND                              | ND                        | ND                        | No                                     |
| THAS                | DELNGFFNK        | Yes               | 542.26                 | 261.2                 | 16.22                       | 71                        | 32.4                | 99542                           | ND                        | ND                        | No                                     |
| THAS                | DELNGFFNK        | Yes               | 542.26                 | 612.3                 | 16.22                       | 71                        | 26.4                | 91029                           | ND                        | ND                        | No                                     |
| THAS                | DELNGFFNK        | Yes               | 542.26                 | 726.4                 | 16.22                       | 71                        | 26.4                | 125863                          | ND                        | ND                        | No                                     |
| THAS                | DELNGFFNK        | Yes               | 542.26                 | 839.4                 | 16.22                       | 71                        | 26.4                | 88895                           | ND                        | ND                        | No                                     |
| THAS                | HPKSPFIGNLTFFR   | Yes               | 586.65                 | 683.4                 | 20.13                       | 76.7                      | 30.5                | 4889                            | ND                        | ND                        | No                                     |
| THAS                | HPKSPFIGNLTFFR   | Yes               | 586.65                 | 797.4                 | 20.13                       | 76.7                      | 27.5                | 5984                            | ND                        | ND                        | No                                     |
| THAS                | HPKSPFIGNLTFFR   | Yes               | 586.65                 | 854.5                 | 20.13                       | 76.7                      | 30.5                | 20738                           | ND                        | ND                        | No                                     |
| THAS                | HPKSPFIGNLTFFR   | Yes               | 586.65                 | 967.5                 | 20.13                       | 76.7                      | 30.5                | 4201                            | ND                        | ND                        | No                                     |

**Table S5.** MRM assay of individual proteins.

| Protein<br>(_HUMAN) | Peptide           | MS/MS<br>spectrum | Precursor ion<br>(m/z) | Fragment ion<br>(m/z) | Retention time<br>(minutes) | Declustering<br>potential | Collision<br>energy | Area of<br>synthetic<br>peptide | Area in control<br>sample | Area in disease<br>sample | Interference |
|---------------------|-------------------|-------------------|------------------------|-----------------------|-----------------------------|---------------------------|---------------------|---------------------------------|---------------------------|---------------------------|--------------|
| THAS                | QQHRPFTYLPFGAGPR  | No                |                        |                       |                             |                           |                     |                                 |                           |                           |              |
| THAS                | QVLVENFSNFTNR     | Yes               | 784.4                  | 341.2                 | 17.04                       | 102.2                     | 37                  | 7047                            | ND                        | ND                        | No           |
| THAS                | QVLVENFSNFTNR     | Yes               | 784.4                  | 651.3                 | 17.04                       | 102.2                     | 37                  | 2806                            | ND                        | ND                        | No           |
| THAS                | QVLVENFSNFTNR     | Yes               | 784.4                  | 738.4                 | 17.04                       | 102.2                     | 46                  | 3661                            | ND                        | ND                        | No           |
| THAS                | QVLVENFSNFTNR     | Yes               | 784.4                  | 999.5                 | 17.04                       | 102.2                     | 40                  | 2879                            | ND                        | ND                        | No           |
| THAS                | SVADSVLFLR        | Yes               | 553.81                 | 647.4                 | 19.09                       | 72.4                      | 26.9                | 34423                           | ND                        | ND                        | No           |
| THAS                | SVADSVLFLR        | Yes               | 553.81                 | 734.5                 | 19.09                       | 72.4                      | 35.9                | 144594                          | ND                        | ND                        | No           |
| THAS                | SVADSVLFLR        | Yes               | 553.81                 | 849.5                 | 19.09                       | 72.4                      | 26.9                | 93672                           | ND                        | ND                        | No           |
| THAS                | SVADSVLFLR        | Yes               | 553.81                 | 920.5                 | 19.09                       | 72.4                      | 26.9                | 197218                          | ND                        | ND                        | No           |
| THY1                | HENTSSSPIQYEFSLTR | Yes               | 665.99                 | 623.4                 | 16.49                       | 86.9                      | 31.5                | 55252                           | ND                        | ND                        | No           |
| THY1                | HENTSSSPIQYEFSLTR | Yes               | 665.99                 | 743.3                 | 16.49                       | 86.9                      | 31.5                | 56561                           | ND                        | ND                        | No           |
| THY1                | HENTSSSPIQYEFSLTR | Yes               | 665.99                 | 752.4                 | 16.49                       | 86.9                      | 31.5                | 43172                           | ND                        | ND                        | No           |
| THY1                | HENTSSSPIQYEFSLTR | Yes               | 665.99                 | 915.5                 | 16.49                       | 86.9                      | 31.5                | 48093                           | ND                        | ND                        | No           |
| THY1                | VLYLSAFTSK        | Yes               | 564.82                 | 376.2                 | 18.19                       | 73.9                      | 24.4                | 164628                          | ND                        | ND                        | No           |
| THY1                | VLYLSAFTSK        | Yes               | 564.82                 | 640.3                 | 18.19                       | 73.9                      | 27.4                | 228055                          | ND                        | ND                        | No           |
| THY1                | VLYLSAFTSK        | Yes               | 564.82                 | 753.4                 | 18.19                       | 73.9                      | 27.4                | 148061                          | ND                        | ND                        | No           |
| THY1                | VLYLSAFTSK        | Yes               | 564.82                 | 916.5                 | 18.19                       | 73.9                      | 27.4                | 238103                          | ND                        | ND                        | No           |
| TIMP1               | FVGTPEVNQTTLYQR   | Yes               | 876.95                 | 304.2                 | 13.68                       | 114.1                     | 50.1                | 42361                           | ND                        | ND                        | No           |
| TIMP1               | FVGTPEVNQTTLYQR   | Yes               | 876.95                 | 405.2                 | 13.68                       | 114.1                     | 41.1                | 86343                           | ND                        | ND                        | No           |
| TIMP1               | FVGTPEVNQTTLYQR   | Yes               | 876.95                 | 466.2                 | 13.68                       | 114.1                     | 41.1                | 33269                           | ND                        | ND                        | No           |
| TIMP1               | FVGTPEVNQTTLYQR   | Yes               | 876.95                 | 781.4                 | 13.68                       | 114.1                     | 50.1                | 29940                           | ND                        | ND                        | No           |
| TIMP1               | GFQALGDAADIR      | Yes               | 617.32                 | 404.2                 | 15.02                       | 80.6                      | 29.7                | 18350                           | 20272                     | 21745                     | No           |
| TIMP1               | GFQALGDAADIR      | Yes               | 617.32                 | 717.4                 | 15.02                       | 80.6                      | 26.7                | 26480                           | 20134                     | 23247                     | No           |

**Table S5.** MRM assay of individual proteins.

| Protein<br>(_HUMAN) | Peptide       | MS/MS<br>spectrum | Precursor ion<br>(m/z) | Fragment ion<br>(m/z) | Retention time<br>(minutes) | Declustering<br>potential | Collision<br>energy | Area of<br>synthetic<br>peptide | Area in control<br>sample | Area in disease<br>sample | Interference |
|---------------------|---------------|-------------------|------------------------|-----------------------|-----------------------------|---------------------------|---------------------|---------------------------------|---------------------------|---------------------------|--------------|
| TIMP1               | GFQALGDAADIR  | Yes               | 617.32                 | 830.4                 | 15.02                       | 80.6                      | 29.7                | 9015                            | 9210                      | 8472                      | No           |
| TIMP1               | GFQALGDAADIR  | Yes               | 617.32                 | 901.5                 | 15.02                       | 80.6                      | 29.7                | 8840                            | 6723                      | 6657                      | No           |
| TIMP1               | SEEFLIAGK     | Yes               | 497.27                 | 275.2                 | 13.80                       | 65.1                      | 33.4                | 1100256                         | ND                        | ND                        | No           |
| TIMP1               | SEEFLIAGK     | Yes               | 497.27                 | 388.3                 | 13.80                       | 65.1                      | 30.4                | 333435                          | ND                        | ND                        | No           |
| TIMP1               | SEEFLIAGK     | Yes               | 497.27                 | 648.4                 | 13.80                       | 65.1                      | 24.4                | 289175                          | ND                        | ND                        | No           |
| TIMP1               | SEEFLIAGK     | Yes               | 497.27                 | 777.5                 | 13.80                       | 65.1                      | 24.4                | 604882                          | ND                        | ND                        | No           |
| TIMP3               | EGPFGTLVYTIK  | Yes               | 662.86                 | 524.3                 | 20.04                       | 86.5                      | 31.7                | 135417                          | ND                        | ND                        | No           |
| TIMP3               | EGPFGTLVYTIK  | Yes               | 662.86                 | 736.5                 | 20.04                       | 86.5                      | 31.7                | 91324                           | ND                        | ND                        | No           |
| TIMP3               | EGPFGTLVYTIK  | Yes               | 662.86                 | 837.5                 | 20.04                       | 86.5                      | 31.7                | 85440                           | ND                        | ND                        | No           |
| TIMP3               | EGPFGTLVYTIK  | Yes               | 662.86                 | 894.5                 | 20.04                       | 86.5                      | 31.7                | 165691                          | ND                        | ND                        | No           |
| TIMP3               | GWAPPDK       | No                |                        |                       |                             |                           |                     |                                 |                           |                           |              |
| TIMP3               | SIINATDP      | No                |                        |                       |                             |                           |                     |                                 |                           |                           |              |
| TIMP3               | YQYLLTGR      | Yes               | 507.27                 | 292.1                 | 13.38                       | 66.4                      | 24.8                | 285060                          | ND                        | ND                        | No           |
| TIMP3               | YQYLLTGR      | Yes               | 507.27                 | 446.3                 | 13.38                       | 66.4                      | 24.8                | 69028                           | ND                        | ND                        | No           |
| TIMP3               | YQYLLTGR      | Yes               | 507.27                 | 559.4                 | 13.38                       | 66.4                      | 33.8                | 103673                          | ND                        | ND                        | No           |
| TIMP3               | YQYLLTGR      | Yes               | 507.27                 | 722.4                 | 13.38                       | 66.4                      | 24.8                | 167700                          | ND                        | ND                        | No           |
| TLL1                | DGTSSENSPLIGR | Yes               | 623.31                 | 555.4                 | 10.11                       | 81.4                      | 38.9                | 75382                           | ND                        | ND                        | No           |
| TLL1                | DGTSSENSPLIGR | Yes               | 623.31                 | 756.4                 | 10.11                       | 81.4                      | 35.9                | 48203                           | ND                        | ND                        | No           |
| TLL1                | DGTSSENSPLIGR | Yes               | 623.31                 | 885.5                 | 10.11                       | 81.4                      | 38.9                | 15918                           | ND                        | ND                        | No           |
| TLL1                | DGTSSENSPLIGR | Yes               | 623.31                 | 972.5                 | 10.11                       | 81.4                      | 38.9                | 20285                           | ND                        | ND                        | No           |
| TLL1                | IPDPLVATGNK   | Yes               | 562.82                 | 326.2                 | 13.51                       | 73.6                      | 27.3                | 558154                          | ND                        | ND                        | No           |
| TLL1                | IPDPLVATGNK   | Yes               | 562.82                 | 490.3                 | 13.51                       | 73.6                      | 36.3                | 451741                          | ND                        | ND                        | No           |
| TLL1                | IPDPLVATGNK   | Yes               | 562.82                 | 799.5                 | 13.51                       | 73.6                      | 30.3                | 775491                          | ND                        | ND                        | No           |

**Table S5.** MRM assay of individual proteins.

| Protein<br>(_HUMAN) | Peptide         | MS/MS<br>spectrum | Precursor ion<br>(m/z) | Fragment ion<br>(m/z) | Retention time<br>(minutes) | Declustering<br>potential | Collision<br>energy | Area of<br>synthetic<br>peptide | Area in control<br>sample | Area in disease<br>sample | Interference                           |
|---------------------|-----------------|-------------------|------------------------|-----------------------|-----------------------------|---------------------------|---------------------|---------------------------------|---------------------------|---------------------------|----------------------------------------|
| TLL1                | IPDPLVATGNK     | Yes               | 562.82                 | 914.5                 | 13.51                       | 73.6                      | 27.3                | 197005                          | ND                        | ND                        | No                                     |
| TLL1                | LNGTITTPGWPK    | Yes               | 642.85                 | 584.3                 | 14.95                       | 83.9                      | 39.8                | ND                              | ND                        | ND                        | No                                     |
| TLL1                | LNGTITTPGWPK    | Yes               | 642.85                 | 685.4                 | 14.95                       | 83.9                      | 33.8                | ND                              | ND                        | ND                        | No                                     |
| TLL1                | LNGTITTPGWPK    | Yes               | 642.85                 | 786.4                 | 14.95                       | 83.9                      | 30.8                | ND                              | ND                        | ND                        | No                                     |
| TLL1                | LNGTITTPGWPK    | Yes               | 642.85                 | 899.5                 | 14.95                       | 83.9                      | 30.8                | ND                              | ND                        | ND                        | No                                     |
| TLL1                | VPLQFSGQNEK     | Yes               | 623.83                 | 438.3                 | 11.05                       | 81.5                      | 32.9                | 65616                           | ND                        | ND                        | No                                     |
| TLL1                | VPLQFSGQNEK     | Yes               | 623.83                 | 662.3                 | 11.05                       | 81.5                      | 38.9                | 141045                          | ND                        | ND                        | No                                     |
| TLL1                | VPLQFSGQNEK     | Yes               | 623.83                 | 809.4                 | 11.05                       | 81.5                      | 38.9                | 185487                          | ND                        | ND                        | No                                     |
| TLL1                | VPLQFSGQNEK     | Yes               | 623.83                 | 937.4                 | 11.05                       | 81.5                      | 38.9                | 57522                           | ND                        | ND                        | No                                     |
| TLL1                | YDYVEIWSGLSSESK | No                |                        |                       |                             |                           |                     |                                 |                           |                           |                                        |
| TNF12               | AAPFLTYFGLFQVH  | Yes               | 805.92                 | 387.2                 | 24.73                       | 105                       | 35                  | 13854                           | ND                        | ND                        | No                                     |
| TNF12               | AAPFLTYFGLFQVH  | Yes               | 805.92                 | 530.3                 | 24.73                       | 105                       | 41                  | 17946                           | ND                        | ND                        | No                                     |
| TNF12               | AAPFLTYFGLFQVH  | Yes               | 805.92                 | 700.4                 | 24.73                       | 105                       | 38                  | 25829                           | ND                        | ND                        | No                                     |
| TNF12               | AAPFLTYFGLFQVH  | Yes               | 805.92                 | 847.4                 | 24.73                       | 105                       | 38                  | 26432                           | ND                        | ND                        | No                                     |
| TNF12               | INSSSPLR        | Yes               | 437.24                 | 385.3                 | 7.87                        | 57.4                      | 21.7                | 48202                           | ND                        | 20009                     | Yes (Based on<br>Transition<br>Ratios) |
| TNF12               | INSSSPLR        | Yes               | 437.24                 | 559.3                 | 7.87                        | 57.4                      | 21.7                | 43082                           | ND                        | ND                        | No                                     |
| TNF12               | INSSSPLR        | Yes               | 437.24                 | 646.4                 | 7.87                        | 57.4                      | 21.7                | 161880                          | 102375                    | 128800                    | Yes (Based on<br>Transition<br>Ratios) |
| TNF12               | INSSSPLR        | Yes               | 437.24                 | 760.4                 | 7.87                        | 57.4                      | 21.7                | 78335                           | ND                        | 2926                      | Yes (Based on<br>Transition<br>Ratios) |
| TNF12               | LDLLVDGVLALR    | Yes               | 648.9                  | 342.2                 | 24.43                       | 84.7                      | 34.1                | 147922                          | 20487                     | 38492                     | No                                     |

**Table S5.** MRM assay of individual proteins.

| Protein<br>(_HUMAN) | Peptide      | MS/MS<br>spectrum | Precursor ion<br>(m/z) | Fragment ion<br>(m/z) | Retention time<br>(minutes) | Decustering<br>potential | Collision<br>energy | Area of<br>synthetic<br>peptide | Area in control<br>sample | Area in disease<br>sample | Interference                       |
|---------------------|--------------|-------------------|------------------------|-----------------------|-----------------------------|--------------------------|---------------------|---------------------------------|---------------------------|---------------------------|------------------------------------|
| TNF12               | LDLLVDGVLALR | Yes               | 648.9                  | 743.4                 | 24.43                       | 84.7                     | 31.1                | 92585                           | 19567                     | 15321                     | No                                 |
| TNF12               | LDLLVDGVLALR | Yes               | 648.9                  | 842.5                 | 24.43                       | 84.7                     | 31.1                | ND                              | 7634                      | 8257                      | Yes (Based on<br>Manual<br>Review) |
| TNF12               | LDLLVDGVLALR | Yes               | 648.9                  | 955.6                 | 24.43                       | 84.7                     | 34.1                | ND                              | ND                        | ND                        | Yes (Based on<br>Manual<br>Review) |
| TNF12               | QIGEFIVTR    | Yes               | 531.8                  | 276.2                 | 14.86                       | 69.6                     | 25.9                | 53844                           | ND                        | ND                        | No                                 |
| TNF12               | QIGEFIVTR    | Yes               | 531.8                  | 635.4                 | 14.86                       | 69.6                     | 34.9                | 45556                           | ND                        | ND                        | No                                 |
| TNF12               | QIGEFIVTR    | Yes               | 531.8                  | 787.4                 | 14.86                       | 69.6                     | 25.9                | 8687                            | ND                        | ND                        | No                                 |
| TNF12               | QIGEFIVTR    | Yes               | 531.8                  | 821.5                 | 14.86                       | 69.6                     | 31.9                | 114316                          | ND                        | ND                        | No                                 |
| TNF12               | TLPWAHLK     | Yes               | 322.52                 | 260.2                 | 14.76                       | 42.6                     | 20                  | 53678                           | ND                        | ND                        | No                                 |
| TNF12               | TLPWAHLK     | Yes               | 322.52                 | 397.3                 | 14.76                       | 42.6                     | 20                  | 2594                            | ND                        | ND                        | No                                 |
| TNF12               | TLPWAHLK     | Yes               | 322.52                 | 468.3                 | 14.76                       | 42.6                     | 17                  | 68474                           | ND                        | ND                        | No                                 |
| TNF12               | TLPWAHLK     | Yes               | 322.52                 | 654.4                 | 14.76                       | 42.6                     | 14                  | 58265                           | ND                        | ND                        | No                                 |
| TNR6                | DITSDSENSNFR | Yes               | 692.8                  | 330.2                 | 9.47                        | 90.4                     | 33                  | 31381                           | ND                        | ND                        | No                                 |
| TNR6                | DITSDSENSNFR | Yes               | 692.8                  | 637.3                 | 9.47                        | 90.4                     | 42                  | 21881                           | ND                        | ND                        | No                                 |
| TNR6                | DITSDSENSNFR | Yes               | 692.8                  | 853.4                 | 9.47                        | 90.4                     | 42                  | 22483                           | ND                        | ND                        | No                                 |
| TNR6                | DITSDSENSNFR | Yes               | 692.8                  | 968.4                 | 9.47                        | 90.4                     | 36                  | 14188                           | ND                        | ND                        | No                                 |
| TNR6                | IQTIILK      | Yes               | 414.78                 | 260.2                 | 13.19                       | 54.5                     | 26.8                | 150318                          | ND                        | ND                        | No                                 |
| TNR6                | IQTIILK      | Yes               | 414.78                 | 373.3                 | 13.19                       | 54.5                     | 29.8                | 152683                          | ND                        | ND                        | No                                 |
| TNR6                | IQTIILK      | Yes               | 414.78                 | 587.4                 | 13.19                       | 54.5                     | 20.8                | 336294                          | ND                        | ND                        | No                                 |
| TNR6                | IQTIILK      | Yes               | 414.78                 | 715.5                 | 13.19                       | 54.5                     | 20.8                | 127895                          | ND                        | ND                        | No                                 |
| TNR6                | NDNVQDTAEQK  | Yes               | 631.29                 | 443.2                 | 5.78                        | 82.4                     | 27.3                | 72669                           | ND                        | ND                        | No                                 |

**Table S5.** MRM assay of individual proteins.

| Protein<br>(_HUMAN) | Peptide                       | MS/MS<br>spectrum | Precursor ion<br>(m/z) | Fragment ion<br>(m/z) | Retention time<br>(minutes) | Declustering<br>potential | Collision<br>energy | Area of<br>synthetic<br>peptide | Area in control<br>sample | Area in disease<br>sample | Interference                       |
|---------------------|-------------------------------|-------------------|------------------------|-----------------------|-----------------------------|---------------------------|---------------------|---------------------------------|---------------------------|---------------------------|------------------------------------|
| TNR6                | NDNVQDTAEQK                   | Yes               | 631.29                 | 691.3                 | 5.78                        | 82.4                      | 30.3                | 47864                           | ND                        | ND                        | No                                 |
| TNR6                | NDNVQDTAEQK                   | Yes               | 631.29                 | 819.4                 | 5.78                        | 82.4                      | 27.3                | 109579                          | ND                        | ND                        | No                                 |
| TNR6                | NDNVQDTAEQK                   | Yes               | 631.29                 | 918.5                 | 5.78                        | 82.4                      | 27.3                | 25191                           | ND                        | ND                        | No                                 |
| TNR6                | NEIQSLV                       | No                |                        |                       |                             |                           |                     |                                 |                           |                           |                                    |
| TNR6                | SVNAQVTDINSK                  | Yes               | 638.33                 | 677.3                 | 8.80                        | 83.3                      | 30.6                | 26027                           | ND                        | ND                        | No                                 |
| TNR6                | SVNAQVTDINSK                  | Yes               | 638.33                 | 776.4                 | 8.80                        | 83.3                      | 30.6                | 25518                           | ND                        | ND                        | No                                 |
| TNR6                | SVNAQVTDINSK                  | Yes               | 638.33                 | 904.5                 | 8.80                        | 83.3                      | 30.6                | 13643                           | ND                        | ND                        | No                                 |
| TNR6                | SVNAQVTDINSK                  | Yes               | 638.33                 | 975.5                 | 8.80                        | 83.3                      | 30.6                | 6362                            | ND                        | ND                        | No                                 |
| TPIS                | ELASQPDVDGFLVGGASLKPEFVDIINAK | No                |                        |                       |                             |                           |                     |                                 |                           |                           |                                    |
| TPIS                | SNVSDAVAQSTR                  | Yes               | 617.81                 | 562.3                 | 8.43                        | 80.7                      | 26.7                | 53539                           | ND                        | ND                        | No                                 |
| TPIS                | SNVSDAVAQSTR                  | Yes               | 617.81                 | 661.4                 | 8.43                        | 80.7                      | 29.7                | 21213                           | ND                        | ND                        | No                                 |
| TPIS                | SNVSDAVAQSTR                  | Yes               | 617.81                 | 847.4                 | 8.43                        | 80.7                      | 35.7                | 15436                           | ND                        | ND                        | No                                 |
| TPIS                | SNVSDAVAQSTR                  | Yes               | 617.81                 | 934.5                 | 8.43                        | 80.7                      | 29.7                | 35543                           | ND                        | ND                        | No                                 |
| TPIS                | TATPQQAQEVHEK                 | Yes               | 489.58                 | 413.2                 | 5.82                        | 64.2                      | 31.5                | 59207                           | ND                        | ND                        | No                                 |
| TPIS                | TATPQQAQEVHEK                 | Yes               | 489.58                 | 512.3                 | 5.82                        | 64.2                      | 28.5                | 26239                           | ND                        | ND                        | No                                 |
| TPIS                | TATPQQAQEVHEK                 | Yes               | 489.58                 | 840.4                 | 5.82                        | 64.2                      | 25.5                | 25009                           | ND                        | ND                        | No                                 |
| TPIS                | TATPQQAQEVHEK                 | Yes               | 489.58                 | 968.5                 | 5.82                        | 64.2                      | 19.5                | 5103                            | ND                        | ND                        | No                                 |
| TPIS                | VVFEQTK                       | Yes               | 425.74                 | 376.2                 | 8.40                        | 55.9                      | 24.2                | 64946                           | ND                        | ND                        | No                                 |
| TPIS                | VVFEQTK                       | Yes               | 425.74                 | 505.3                 | 8.40                        | 55.9                      | 21.2                | 49112                           | ND                        | ND                        | No                                 |
| TPIS                | VVFEQTK                       | Yes               | 425.74                 | 652.3                 | 8.40                        | 55.9                      | 21.2                | 486456                          | ND                        | ND                        | No                                 |
| TPIS                | VVFEQTK                       | Yes               | 425.74                 | 751.4                 | 8.40                        | 55.9                      | 21.2                | 64050                           | ND                        | ND                        | No                                 |
| TPIS                | VVLAYEYPVWAIGTGK              | Yes               | 801.95                 | 312.2                 | 20.93                       | 104.5                     | 37.8                | ND                              | 9482                      | 15308                     | Yes (Based on<br>Manual<br>Review) |

**Table S5.** MRM assay of individual proteins.

| Protein<br>(_HUMAN) | Peptide              | MS/MS<br>spectrum | Precursor ion<br>(m/z) | Fragment ion<br>(m/z) | Retention time<br>(minutes) | Declustering<br>potential | Collision<br>energy | Area of<br>synthetic<br>peptide | Area in control<br>sample | Area in disease<br>sample | Interference                           |
|---------------------|----------------------|-------------------|------------------------|-----------------------|-----------------------------|---------------------------|---------------------|---------------------------------|---------------------------|---------------------------|----------------------------------------|
| TPIS                | VVLAYEPVWAIGTGK      | Yes               | 801.95                 | 362.2                 | 20.93                       | 104.5                     | 34.8                | 89190                           | 3915                      | 7956                      | No                                     |
| TPIS                | VVLAYEPVWAIGTGK      | Yes               | 801.95                 | 383.3                 | 20.93                       | 104.5                     | 34.8                | 139849                          | 7577                      | 12094                     | No                                     |
| TPIS                | VVLAYEPVWAIGTGK      | Yes               | 801.95                 | 928.5                 | 20.93                       | 104.5                     | 34.8                | 167799                          | 13107                     | 11863                     | No                                     |
| TRFL                | ADAVTLDGGFIYEAGLAPYK | Yes               | 1036.02                | 407.2                 | 21.21                       | 134.6                     | 48.1                | 15413                           | ND                        | ND                        | No                                     |
| TRFL                | ADAVTLDGGFIYEAGLAPYK | Yes               | 1036.02                | 571.3                 | 21.21                       | 134.6                     | 48.1                | 2916                            | ND                        | ND                        | No                                     |
| TRFL                | ADAVTLDGGFIYEAGLAPYK | Yes               | 1036.02                | 648.4                 | 21.21                       | 134.6                     | 57.1                | 3344                            | ND                        | ND                        | No                                     |
| TRFL                | ADAVTLDGGFIYEAGLAPYK | Yes               | 1036.02                | 719.4                 | 21.21                       | 134.6                     | 48.1                | 2849                            | ND                        | ND                        | No                                     |
| TRFL                | FQLFGSPSGQK          | Yes               | 598.31                 | 276.1                 | 16.37                       | 78.2                      | 28.8                | 1388951                         | ND                        | ND                        | No                                     |
| TRFL                | FQLFGSPSGQK          | Yes               | 598.31                 | 660.3                 | 16.37                       | 78.2                      | 37.8                | 157791                          | ND                        | ND                        | No                                     |
| TRFL                | FQLFGSPSGQK          | Yes               | 598.31                 | 807.4                 | 16.37                       | 78.2                      | 28.8                | 387590                          | ND                        | ND                        | No                                     |
| TRFL                | FQLFGSPSGQK          | Yes               | 598.31                 | 920.5                 | 16.37                       | 78.2                      | 28.8                | 322162                          | ND                        | ND                        | No                                     |
| TRFL                | LRPVAAEVYGTER        | Yes               | 487.6                  | 462.2                 | 10.83                       | 63.9                      | 22.4                | 142957                          | 1268                      | ND                        | No                                     |
| TRFL                | LRPVAAEVYGTER        | Yes               | 487.6                  | 608.4                 | 10.83                       | 63.9                      | 22.4                | 27211                           | ND                        | ND                        | No                                     |
| TRFL                | LRPVAAEVYGTER        | Yes               | 487.6                  | 625.3                 | 10.83                       | 63.9                      | 22.4                | 141347                          | 3496                      | ND                        | No                                     |
| TRFL                | LRPVAAEVYGTER        | Yes               | 487.6                  | 737.4                 | 10.83                       | 63.9                      | 22.4                | 93835                           | 2506                      | ND                        | No                                     |
| TRFL                | VPSHAVVAR            | Yes               | 312.52                 | 345.2                 | 6.10                        | 41.3                      | 16.5                | 38398                           | ND                        | 1790149                   | Yes (Based on<br>Transition<br>Ratios) |
| TRFL                | VPSHAVVAR            | Yes               | 312.52                 | 444.3                 | 6.10                        | 41.3                      | 19.5                | 44379                           | ND                        | 1540                      | No                                     |
| TRFL                | VPSHAVVAR            | Yes               | 312.52                 | 515.3                 | 6.10                        | 41.3                      | 19.5                | 81835                           | ND                        | 5549                      | No                                     |
| TRFL                | VPSHAVVAR            | Yes               | 312.52                 | 739.4                 | 6.10                        | 41.3                      | 10.5                | ND                              | ND                        | ND                        | No                                     |
| TRFL                | YYGYTGAFR            | Yes               | 549.26                 | 450.2                 | 13.16                       | 71.9                      | 26.7                | 76835                           | ND                        | ND                        | No                                     |
| TRFL                | YYGYTGAFR            | Yes               | 549.26                 | 714.4                 | 13.16                       | 71.9                      | 26.7                | 53107                           | ND                        | ND                        | No                                     |
| TRFL                | YYGYTGAFR            | Yes               | 549.26                 | 771.4                 | 13.16                       | 71.9                      | 26.7                | 413048                          | ND                        | ND                        | No                                     |

**Table S5.** MRM assay of individual proteins.

| Protein<br>(_HUMAN) | Peptide          | MS/MS<br>spectrum | Precursor ion<br>(m/z) | Fragment ion<br>(m/z) | Retention time<br>(minutes) | Declustering<br>potential | Collision<br>energy | Area of<br>synthetic<br>peptide | Area in control<br>sample | Area in disease<br>sample | Interference                       |
|---------------------|------------------|-------------------|------------------------|-----------------------|-----------------------------|---------------------------|---------------------|---------------------------------|---------------------------|---------------------------|------------------------------------|
| TRFL                | YYGYTGAFR        | Yes               | 549.26                 | 934.4                 | 13.16                       | 71.9                      | 26.7                | 41023                           | ND                        | ND                        | No                                 |
| TSP1                | FQDLVDAVR        | Yes               | 531.78                 | 391.2                 | 14.82                       | 69.6                      | 25.9                | 139448                          | ND                        | ND                        | No                                 |
| TSP1                | FQDLVDAVR        | Yes               | 531.78                 | 559.3                 | 14.82                       | 69.6                      | 25.9                | 135339                          | ND                        | ND                        | No                                 |
| TSP1                | FQDLVDAVR        | Yes               | 531.78                 | 672.4                 | 14.82                       | 69.6                      | 34.9                | 78199                           | ND                        | ND                        | No                                 |
| TSP1                | FQDLVDAVR        | Yes               | 531.78                 | 787.4                 | 14.82                       | 69.6                      | 25.9                | 324827                          | ND                        | ND                        | No                                 |
| TSP1                | FTGSQPFQGVHATANK | Yes               | 625.97                 | 261.2                 | 11.27                       | 81.8                      | 38.5                | ND                              | ND                        | 17659                     | Yes (Based on<br>Manual<br>Review) |
| TSP1                | FTGSQPFQGVHATANK | Yes               | 625.97                 | 504.3                 | 11.27                       | 81.8                      | 38.5                | ND                              | ND                        | 10888                     | Yes (Based on<br>Manual<br>Review) |
| TSP1                | FTGSQPFQGVHATANK | Yes               | 625.97                 | 521.2                 | 11.27                       | 81.8                      | 26.5                | 22090                           | 9087                      | 11946                     | No                                 |
| TSP1                | FTGSQPFQGVHATANK | Yes               | 625.97                 | 926.5                 | 11.27                       | 81.8                      | 35.5                | 7556                            | 3730                      | 1551                      | No                                 |
| TSP1                | FVFGTTPEDILR     | Yes               | 465.58                 | 288.2                 | 20.74                       | 61.1                      | 27.3                | 33398                           | ND                        | ND                        | No                                 |
| TSP1                | FVFGTTPEDILR     | Yes               | 465.58                 | 516.3                 | 20.74                       | 61.1                      | 21.3                | 31507                           | 11257                     | 17673                     | No                                 |
| TSP1                | FVFGTTPEDILR     | Yes               | 465.58                 | 645.4                 | 20.74                       | 61.1                      | 24.3                | 22856                           | 9340                      | 15332                     | No                                 |
| TSP1                | FVFGTTPEDILR     | Yes               | 465.58                 | 742.4                 | 20.74                       | 61.1                      | 21.3                | 34227                           | 12158                     | 15597                     | No                                 |
| TSP1                | GFLLLASLR        | Yes               | 495.31                 | 318.2                 | 23.25                       | 64.9                      | 21.3                | ND                              | 141668                    | 285281                    | No                                 |
| TSP1                | GFLLLASLR        | Yes               | 495.31                 | 375.2                 | 23.25                       | 64.9                      | 33.3                | ND                              | 29364                     | 40659                     | No                                 |
| TSP1                | GFLLLASLR        | Yes               | 495.31                 | 446.3                 | 23.25                       | 64.9                      | 27.3                | ND                              | 100807                    | 204220                    | No                                 |
| TSP1                | GFLLLASLR        | Yes               | 495.31                 | 559.4                 | 23.25                       | 64.9                      | 24.3                | ND                              | 175194                    | 330863                    | No                                 |
| TSP1                | GTSQNDPNWVVR     | Yes               | 686.83                 | 373.3                 | 11.85                       | 89.6                      | 29.7                | 11667                           | 13952                     | 48759                     | No                                 |
| TSP1                | GTSQNDPNWVVR     | Yes               | 686.83                 | 770.4                 | 11.85                       | 89.6                      | 38.7                | 27410                           | 34205                     | 66462                     | No                                 |
| TSP1                | GTSQNDPNWVVR     | Yes               | 686.83                 | 885.5                 | 11.85                       | 89.6                      | 32.7                | 4634                            | 2142                      | 5334                      | Yes (Based on<br>Transition)       |



**Table S5.** MRM assay of individual proteins.

| Protein<br>(_HUMAN) | Peptide                | MS/MS<br>spectrum | Precursor ion<br>(m/z) | Fragment ion<br>(m/z) | Retention time<br>(minutes) | Declustering<br>potential | Collision<br>energy | Area of<br>synthetic<br>peptide | Area in control<br>sample | Area in disease<br>sample | Interference<br><br>(Ratios) |
|---------------------|------------------------|-------------------|------------------------|-----------------------|-----------------------------|---------------------------|---------------------|---------------------------------|---------------------------|---------------------------|------------------------------|
| TSP1                | GTSQNDPNWVVR           | Yes               | 686.83                 | 999.5                 | 11.85                       | 89.6                      | 38.7                | 6281                            | 6393                      | 12291                     | No                           |
| TTHY                | TSESGELHGLTTEEEFVEGIYK | Yes               | 819.06                 | 480.3                 | 19.88                       | 106.7                     | 45.3                | 10047                           | ND                        | ND                        | No                           |
| TTHY                | TSESGELHGLTTEEEFVEGIYK | Yes               | 819.06                 | 609.3                 | 19.88                       | 106.7                     | 39.3                | 11879                           | ND                        | ND                        | No                           |
| TTHY                | TSESGELHGLTTEEEFVEGIYK | Yes               | 819.06                 | 708.4                 | 19.88                       | 106.7                     | 39.3                | 8446                            | ND                        | ND                        | No                           |
| TTHY                | TSESGELHGLTTEEEFVEGIYK | Yes               | 819.06                 | 855.5                 | 19.88                       | 106.7                     | 39.3                | 9453                            | ND                        | ND                        | No                           |
| TTHY                | VEIDTK                 | Yes               | 352.7                  | 457.2                 | 6.78                        | 46.5                      | 15                  | 53034                           | ND                        | ND                        | No                           |
| TTHY                | VEIDTK                 | Yes               | 352.7                  | 476.3                 | 6.78                        | 46.5                      | 18                  | 220871                          | ND                        | ND                        | No                           |
| TTHY                | VEIDTK                 | Yes               | 352.7                  | 605.3                 | 6.78                        | 46.5                      | 18                  | 146056                          | ND                        | ND                        | No                           |
| TYPH                | ALQEALVLSDR            | Yes               | 607.84                 | 490.3                 | 14.64                       | 79.4                      | 26.2                | 28234                           | 990                       | ND                        | No                           |
| TYPH                | ALQEALVLSDR            | Yes               | 607.84                 | 702.4                 | 14.64                       | 79.4                      | 29.2                | 23916                           | ND                        | ND                        | No                           |
| TYPH                | ALQEALVLSDR            | Yes               | 607.84                 | 773.5                 | 14.64                       | 79.4                      | 32.2                | 25174                           | ND                        | ND                        | No                           |
| TYPH                | ALQEALVLSDR            | Yes               | 607.84                 | 902.5                 | 14.64                       | 79.4                      | 29.2                | 18976                           | ND                        | ND                        | No                           |
| TYPH                | EQEELLAPADGTVELVR      | Yes               | 623.66                 | 742.4                 | 17.56                       | 81.5                      | 29.4                | 12904                           | ND                        | ND                        | No                           |
| TYPH                | EQEELLAPADGTVELVR      | Yes               | 623.66                 | 773.5                 | 17.56                       | 81.5                      | 38.4                | 28915                           | ND                        | ND                        | No                           |
| TYPH                | EQEELLAPADGTVELVR      | Yes               | 623.66                 | 888.5                 | 17.56                       | 81.5                      | 32.4                | 21622                           | ND                        | ND                        | No                           |
| TYPH                | EQEELLAPADGTVELVR      | Yes               | 623.66                 | 959.5                 | 17.56                       | 81.5                      | 32.4                | 8910                            | ND                        | ND                        | No                           |
| TYPH                | LSEADIR                | No                |                        |                       |                             |                           |                     |                                 |                           |                           |                              |
| TYPH                | TLVGVGASLGLR           | Yes               | 571.85                 | 673.4                 | 17.25                       | 74.8                      | 27.7                | 211681                          | ND                        | ND                        | No                           |
| TYPH                | TLVGVGASLGLR           | Yes               | 571.85                 | 772.5                 | 17.25                       | 74.8                      | 27.7                | 43012                           | ND                        | ND                        | No                           |
| TYPH                | TLVGVGASLGLR           | Yes               | 571.85                 | 829.5                 | 17.25                       | 74.8                      | 27.7                | 192191                          | ND                        | ND                        | No                           |
| TYPH                | TLVGVGASLGLR           | Yes               | 571.85                 | 928.6                 | 17.25                       | 74.8                      | 27.7                | 73164                           | ND                        | ND                        | No                           |
| TYPH                | VAAALDDGSALGR          | Yes               | 608.32                 | 675.3                 | 11.15                       | 79.5                      | 38.3                | 19577                           | ND                        | ND                        | No                           |

**Table S5.** MRM assay of individual proteins.

| Protein<br>(_HUMAN) | Peptide                  | MS/MS<br>spectrum | Precursor ion<br>(m/z) | Fragment ion<br>(m/z) | Retention time<br>(minutes) | Declustering<br>potential | Collision<br>energy | Area of<br>synthetic<br>peptide | Area in control<br>sample | Area in disease<br>sample | Interference |
|---------------------|--------------------------|-------------------|------------------------|-----------------------|-----------------------------|---------------------------|---------------------|---------------------------------|---------------------------|---------------------------|--------------|
| TYPH                | VAAALDDGSALGR            | Yes               | 608.32                 | 790.4                 | 11.15                       | 79.5                      | 29.3                | 26728                           | ND                        | ND                        | No           |
| TYPH                | VAAALDDGSALGR            | Yes               | 608.32                 | 903.5                 | 11.15                       | 79.5                      | 29.3                | 11366                           | ND                        | ND                        | No           |
| TYPH                | VAAALDDGSALGR            | Yes               | 608.32                 | 974.5                 | 11.15                       | 79.5                      | 38.3                | 6458                            | ND                        | ND                        | No           |
| UGGG1               | DLSQNFPTK                | Yes               | 525.27                 | 345.2                 | 10.82                       | 68.8                      | 34.6                | 956000                          | ND                        | ND                        | No           |
| UGGG1               | DLSQNFPTK                | Yes               | 525.27                 | 606.3                 | 10.82                       | 68.8                      | 25.6                | 90920                           | ND                        | ND                        | No           |
| UGGG1               | DLSQNFPTK                | Yes               | 525.27                 | 734.4                 | 10.82                       | 68.8                      | 25.6                | 81940                           | ND                        | ND                        | No           |
| UGGG1               | DLSQNFPTK                | Yes               | 525.27                 | 821.4                 | 10.82                       | 68.8                      | 25.6                | 383897                          | ND                        | ND                        | No           |
| UGGG1               | FTILDSQ GK               | Yes               | 504.77                 | 534.3                 | 13.22                       | 66.1                      | 24.7                | 390793                          | ND                        | ND                        | No           |
| UGGG1               | FTILDSQ GK               | Yes               | 504.77                 | 647.3                 | 13.22                       | 66.1                      | 24.7                | 335210                          | ND                        | ND                        | No           |
| UGGG1               | FTILDSQ GK               | Yes               | 504.77                 | 760.4                 | 13.22                       | 66.1                      | 24.7                | 454157                          | ND                        | ND                        | No           |
| UGGG1               | FTILDSQ GK               | Yes               | 504.77                 | 861.5                 | 13.22                       | 66.1                      | 24.7                | 69405                           | ND                        | ND                        | No           |
| UGGG1               | IIGPLEDSELFNQDDFHLENIILK | No                |                        |                       |                             |                           |                     |                                 |                           |                           |              |
| UGGG1               | LGIEGLSLHNVLK            | Yes               | 696.91                 | 413.2                 | 19.28                       | 90.9                      | 33.2                | 7789                            | ND                        | ND                        | No           |
| UGGG1               | LGIEGLSLHNVLK            | Yes               | 696.91                 | 610.4                 | 19.28                       | 90.9                      | 42.2                | 11508                           | ND                        | ND                        | No           |
| UGGG1               | LGIEGLSLHNVLK            | Yes               | 696.91                 | 810.5                 | 19.28                       | 90.9                      | 36.2                | 18861                           | ND                        | ND                        | No           |
| UGGG1               | LGIEGLSLHNVLK            | Yes               | 696.91                 | 980.6                 | 19.28                       | 90.9                      | 36.2                | 12310                           | ND                        | ND                        | No           |
| UGGG1               | YVLEPEISFTSDNSFAK        | Yes               | 649.65                 | 505.3                 | 19.66                       | 84.8                      | 30.7                | 14504                           | ND                        | ND                        | No           |
| UGGG1               | YVLEPEISFTSDNSFAK        | Yes               | 649.65                 | 681.3                 | 19.66                       | 84.8                      | 30.7                | 8297                            | ND                        | ND                        | No           |
| UGGG1               | YVLEPEISFTSDNSFAK        | Yes               | 649.65                 | 768.4                 | 19.66                       | 84.8                      | 27.7                | 23699                           | ND                        | ND                        | No           |
| UGGG1               | YVLEPEISFTSDNSFAK        | Yes               | 649.65                 | 869.4                 | 19.66                       | 84.8                      | 27.7                | 20982                           | ND                        | ND                        | No           |
| UGGG2               | ANPGAWILR                | No                |                        |                       |                             |                           |                     |                                 |                           |                           |              |
| UGGG2               | FLGPLDEDFYAEDFYLLEK      | Yes               | 1162.55                | 389.2                 | 24.65                       | 151                       | 59.7                | 5209                            | ND                        | ND                        | No           |
| UGGG2               | FLGPLDEDFYAEDFYLLEK      | Yes               | 1162.55                | 502.3                 | 24.65                       | 151                       | 59.7                | 4857                            | ND                        | ND                        | No           |

**Table S5.** MRM assay of individual proteins.

| Protein<br>(_HUMAN) | Peptide             | MS/MS<br>spectrum | Precursor ion<br>(m/z) | Fragment ion<br>(m/z) | Retention time<br>(minutes) | Declustering<br>potential | Collision<br>energy | Area of<br>synthetic<br>peptide | Area in control<br>sample | Area in disease<br>sample | Interference |
|---------------------|---------------------|-------------------|------------------------|-----------------------|-----------------------------|---------------------------|---------------------|---------------------------------|---------------------------|---------------------------|--------------|
| UGGG2               | FLGPLDEDFYAEDFYLLEK | Yes               | 1162.55                | 643.3                 | 24.65                       | 151                       | 50.7                | 2428                            | ND                        | ND                        | No           |
| UGGG2               | FLGPLDEDFYAEDFYLLEK | Yes               | 1162.55                | 665.4                 | 24.65                       | 151                       | 56.7                | 3147                            | ND                        | ND                        | No           |
| UGGG2               | IIFVDADQIVR         | No                |                        |                       |                             |                           |                     |                                 |                           |                           |              |
| UGGG2               | ILFLDVLFPLAVDK      | Yes               | 801.98                 | 374.2                 | 24.95                       | 104.5                     | 37.8                | 184983                          | ND                        | ND                        | No           |
| UGGG2               | ILFLDVLFPLAVDK      | Yes               | 801.98                 | 642.4                 | 24.95                       | 104.5                     | 46.8                | 202682                          | ND                        | ND                        | No           |
| UGGG2               | ILFLDVLFPLAVDK      | Yes               | 801.98                 | 701.4                 | 24.95                       | 104.5                     | 34.8                | 87395                           | ND                        | ND                        | No           |
| UGGG2               | ILFLDVLFPLAVDK      | Yes               | 801.98                 | 902.5                 | 24.95                       | 104.5                     | 37.8                | 125535                          | ND                        | ND                        | No           |
| UGGG2               | INEENTAISR          | Yes               | 573.79                 | 262.2                 | 7.52                        | 75                        | 27.7                | 8281                            | ND                        | ND                        | No           |
| UGGG2               | INEENTAISR          | Yes               | 573.79                 | 661.4                 | 7.52                        | 75                        | 24.7                | 4196                            | ND                        | ND                        | No           |
| UGGG2               | INEENTAISR          | Yes               | 573.79                 | 790.4                 | 7.52                        | 75                        | 30.7                | 7901                            | ND                        | ND                        | No           |
| UGGG2               | INEENTAISR          | Yes               | 573.79                 | 919.4                 | 7.52                        | 75                        | 24.7                | 7352                            | ND                        | ND                        | No           |
| UGPA                | GGTLTQYEGK          | Yes               | 527.26                 | 496.2                 | 9.86                        | 69                        | 34.7                | 722087                          | ND                        | ND                        | No           |
| UGPA                | GGTLTQYEGK          | Yes               | 527.26                 | 624.3                 | 9.86                        | 69                        | 25.7                | 513359                          | ND                        | ND                        | No           |
| UGPA                | GGTLTQYEGK          | Yes               | 527.26                 | 725.3                 | 9.86                        | 69                        | 28.7                | 1838226                         | ND                        | ND                        | No           |
| UGPA                | GGTLTQYEGK          | Yes               | 527.26                 | 838.4                 | 9.86                        | 69                        | 22.7                | 378421                          | ND                        | ND                        | No           |
| UGPA                | GLPDNISSVLNK        | Yes               | 628.85                 | 261.2                 | 18.04                       | 82.1                      | 39.2                | 229506                          | 25460                     | 13892                     | No           |
| UGPA                | GLPDNISSVLNK        | Yes               | 628.85                 | 760.5                 | 18.04                       | 82.1                      | 36.2                | 68617                           | 9863                      | 13837                     | No           |
| UGPA                | GLPDNISSVLNK        | Yes               | 628.85                 | 874.5                 | 18.04                       | 82.1                      | 36.2                | 119530                          | 3359                      | ND                        | No           |
| UGPA                | GLPDNISSVLNK        | Yes               | 628.85                 | 989.5                 | 18.04                       | 82.1                      | 33.2                | 61588                           | ND                        | ND                        | No           |
| UGPA                | GTVIIIANHGDR        | Yes               | 633.35                 | 371.2                 | 12.12                       | 82.7                      | 33.4                | 375157                          | ND                        | ND                        | No           |
| UGPA                | GTVIIIANHGDR        | Yes               | 633.35                 | 598.3                 | 12.12                       | 82.7                      | 33.4                | 129762                          | ND                        | ND                        | No           |
| UGPA                | GTVIIIANHGDR        | Yes               | 633.35                 | 669.3                 | 12.12                       | 82.7                      | 33.4                | 283337                          | ND                        | ND                        | No           |
| UGPA                | GTVIIIANHGDR        | Yes               | 633.35                 | 895.5                 | 12.12                       | 82.7                      | 36.4                | 365353                          | ND                        | ND                        | No           |

**Table S5.** MRM assay of individual proteins.

| Protein<br>(_HUMAN) | Peptide            | MS/MS<br>spectrum | Precursor ion<br>(m/z) | Fragment ion<br>(m/z) | Retention time<br>(minutes) | Declustering<br>potential | Collision<br>energy | Area of<br>synthetic<br>peptide | Area in control<br>sample | Area in disease<br>sample | Interference |
|---------------------|--------------------|-------------------|------------------------|-----------------------|-----------------------------|---------------------------|---------------------|---------------------------------|---------------------------|---------------------------|--------------|
| UGPA                | IDIPPGAVLENK       | Yes               | 633.36                 | 261.2                 | 15.81                       | 82.7                      | 39.4                | 236639                          | ND                        | ND                        | No           |
| UGPA                | IDIPPGAVLENK       | Yes               | 633.36                 | 730.4                 | 15.81                       | 82.7                      | 39.4                | 65711                           | ND                        | ND                        | No           |
| UGPA                | IDIPPGAVLENK       | Yes               | 633.36                 | 827.5                 | 15.81                       | 82.7                      | 33.4                | 542953                          | ND                        | ND                        | No           |
| UGPA                | IDIPPGAVLENK       | Yes               | 633.36                 | 924.5                 | 15.81                       | 82.7                      | 30.4                | 835198                          | ND                        | ND                        | No           |
| UGPA                | IFNTNNLWISLAAVK    | Yes               | 852.48                 | 317.2                 | 25.01                       | 111                       | 37                  | ND                              | ND                        | ND                        | No           |
| UGPA                | IFNTNNLWISLAAVK    | Yes               | 852.48                 | 588.4                 | 25.01                       | 111                       | 43                  | 32659                           | ND                        | ND                        | No           |
| UGPA                | IFNTNNLWISLAAVK    | Yes               | 852.48                 | 701.5                 | 25.01                       | 111                       | 43                  | 19383                           | ND                        | ND                        | No           |
| UGPA                | IFNTNNLWISLAAVK    | Yes               | 852.48                 | 887.5                 | 25.01                       | 111                       | 40                  | 28332                           | ND                        | ND                        | No           |
| UGPA                | IQRPPEDSIQPYEK     | Yes               | 567.29                 | 536.3                 | 11.66                       | 74.2                      | 29.5                | 439122                          | ND                        | ND                        | No           |
| UGPA                | IQRPPEDSIQPYEK     | Yes               | 567.29                 | 664.3                 | 11.66                       | 74.2                      | 26.5                | 111491                          | ND                        | ND                        | No           |
| UGPA                | IQRPPEDSIQPYEK     | Yes               | 567.29                 | 721.4                 | 11.66                       | 74.2                      | 32.5                | 45755                           | ND                        | ND                        | No           |
| UGPA                | IQRPPEDSIQPYEK     | Yes               | 567.29                 | 923.5                 | 11.66                       | 74.2                      | 32.5                | 127914                          | ND                        | ND                        | No           |
| UGPA                | LVEIAQVPK          | Yes               | 498.81                 | 343.2                 | 14.12                       | 65.3                      | 33.4                | 413214                          | ND                        | ND                        | No           |
| UGPA                | LVEIAQVPK          | Yes               | 498.81                 | 542.3                 | 14.12                       | 65.3                      | 27.4                | 686080                          | 16153                     | 4681                      | No           |
| UGPA                | LVEIAQVPK          | Yes               | 498.81                 | 655.4                 | 14.12                       | 65.3                      | 24.4                | 654379                          | 7910                      | 5058                      | No           |
| UGPA                | LVEIAQVPK          | Yes               | 498.81                 | 784.5                 | 14.12                       | 65.3                      | 24.4                | 2727237                         | 35953                     | 19219                     | No           |
| UGPA                | NENTFLDLTVQQIEHLNK | Yes               | 719.37                 | 511.3                 | 24.46                       | 93.8                      | 43.2                | 116966                          | 56496                     | 37002                     | No           |
| UGPA                | NENTFLDLTVQQIEHLNK | Yes               | 719.37                 | 753.4                 | 24.46                       | 93.8                      | 43.2                | 49363                           | 13403                     | 4814                      | No           |
| UGPA                | NENTFLDLTVQQIEHLNK | Yes               | 719.37                 | 881.5                 | 24.46                       | 93.8                      | 43.2                | 49230                           | 12478                     | 5952                      | No           |
| UGPA                | NENTFLDLTVQQIEHLNK | Yes               | 719.37                 | 947.4                 | 24.46                       | 93.8                      | 31.2                | 1269                            | 43706                     | 28610                     | No           |
| UGPA                | SFENSLGINVPR       | Yes               | 666.85                 | 272.2                 | 17.80                       | 87                        | 28.8                | 1597343                         | ND                        | ND                        | No           |
| UGPA                | SFENSLGINVPR       | Yes               | 666.85                 | 485.3                 | 17.80                       | 87                        | 31.8                | 566189                          | 2118                      | ND                        | No           |
| UGPA                | SFENSLGINVPR       | Yes               | 666.85                 | 768.5                 | 17.80                       | 87                        | 40.8                | 379973                          | ND                        | ND                        | No           |

**Table S5.** MRM assay of individual proteins.

| Protein<br>(_HUMAN) | Peptide                     | MS/MS<br>spectrum | Precursor ion<br>(m/z) | Fragment ion<br>(m/z) | Retention time<br>(minutes) | Declustering<br>potential | Collision<br>energy | Area of<br>synthetic<br>peptide | Area in control<br>sample | Area in disease<br>sample | Interference                           |
|---------------------|-----------------------------|-------------------|------------------------|-----------------------|-----------------------------|---------------------------|---------------------|---------------------------------|---------------------------|---------------------------|----------------------------------------|
| UGPA                | SFENSLGINVPR                | Yes               | 666.85                 | 969.5                 | 17.80                       | 87                        | 37.8                | 220762                          | ND                        | ND                        | No                                     |
| UGPA                | TLDGGLNVIQLETAVGAAIK        | Yes               | 661.71                 | 459.3                 | 24.99                       | 86.4                      | 28.3                | 7822                            | ND                        | ND                        | No                                     |
| UGPA                | TLDGGLNVIQLETAVGAAIK        | Yes               | 661.71                 | 558.4                 | 24.99                       | 86.4                      | 31.3                | 7512                            | ND                        | ND                        | No                                     |
| UGPA                | TLDGGLNVIQLETAVGAAIK        | Yes               | 661.71                 | 730.4                 | 24.99                       | 86.4                      | 28.3                | 9465                            | ND                        | ND                        | No                                     |
| UGPA                | TLDGGLNVIQLETAVGAAIK        | Yes               | 661.71                 | 770.4                 | 24.99                       | 86.4                      | 31.3                | 9670                            | ND                        | ND                        | No                                     |
| UPAR                | LWEEGEELELVEK               | No                |                        |                       |                             |                           |                     |                                 |                           |                           |                                        |
| UPAR                | LWGGTLLWT                   | No                |                        |                       |                             |                           |                     |                                 |                           |                           |                                        |
| UTER                | LVDTLPQKPR                  | No                |                        |                       |                             |                           |                     |                                 |                           |                           |                                        |
| UTER                | VIETLLMDTPSSYEAMELFSPDQDMR  | No                |                        |                       |                             |                           |                     |                                 |                           |                           |                                        |
| VA0D1               | ADDYEQVK                    | Yes               | 484.22                 | 302.1                 | 6.89                        | 63.5                      | 20.8                | 60785                           | ND                        | ND                        | No                                     |
| VA0D1               | ADDYEQVK                    | Yes               | 484.22                 | 666.3                 | 6.89                        | 63.5                      | 20.8                | 32399                           | ND                        | ND                        | No                                     |
| VA0D1               | ADDYEQVK                    | Yes               | 484.22                 | 781.4                 | 6.89                        | 63.5                      | 23.8                | 129833                          | ND                        | ND                        | No                                     |
| VA0D1               | ADDYEQVK                    | Yes               | 484.22                 | 896.4                 | 6.89                        | 63.5                      | 23.8                | 29963                           | ND                        | ND                        | No                                     |
| VA0D1               | LHLQSTDYGNFLANEASPLTVSVIDDR | No                |                        |                       |                             |                           |                     |                                 |                           |                           |                                        |
| VA0D1               | LLFEGAGSNPGDK               | Yes               | 652.83                 | 416.2                 | 13.34                       | 85.2                      | 40.2                | 665185                          | 45287                     | 57417                     | Yes (Based on<br>Transition<br>Ratios) |
| VA0D1               | LLFEGAGSNPGDK               | Yes               | 652.83                 | 674.3                 | 13.34                       | 85.2                      | 31.2                | 213096                          | ND                        | ND                        | No                                     |
| VA0D1               | LLFEGAGSNPGDK               | Yes               | 652.83                 | 802.4                 | 13.34                       | 85.2                      | 34.2                | 483152                          | ND                        | ND                        | No                                     |
| VA0D1               | LLFEGAGSNPGDK               | Yes               | 652.83                 | 931.4                 | 13.34                       | 85.2                      | 31.2                | 119809                          | ND                        | 1695                      | Yes (Based on<br>Transition<br>Ratios) |
| VA0D1               | LYPEGLAQLAR                 | Yes               | 615.85                 | 558.3                 | 16.73                       | 80.4                      | 38.6                | 27510                           | ND                        | ND                        | No                                     |
| VA0D1               | LYPEGLAQLAR                 | Yes               | 615.85                 | 728.4                 | 16.73                       | 80.4                      | 38.6                | 42475                           | ND                        | ND                        | No                                     |

**Table S5.** MRM assay of individual proteins.

| Protein<br>(_HUMAN) | Peptide                    | MS/MS<br>spectrum | Precursor ion<br>(m/z) | Fragment ion<br>(m/z) | Retention time<br>(minutes) | Decustering<br>potential | Collision<br>energy | Area of<br>synthetic<br>peptide | Area in control<br>sample | Area in disease<br>sample | Interference |
|---------------------|----------------------------|-------------------|------------------------|-----------------------|-----------------------------|--------------------------|---------------------|---------------------------------|---------------------------|---------------------------|--------------|
| VA0D1               | LYPEGLAQLAR                | Yes               | 615.85                 | 857.5                 | 16.73                       | 80.4                     | 38.6                | 16382                           | ND                        | ND                        | No           |
| VA0D1               | LYPEGLAQLAR                | Yes               | 615.85                 | 954.5                 | 16.73                       | 80.4                     | 29.6                | 21297                           | ND                        | ND                        | No           |
| VA0D1               | NVADYYPEYK                 | Yes               | 631.29                 | 285.2                 | 12.06                       | 82.4                     | 27.3                | 105708                          | ND                        | ND                        | No           |
| VA0D1               | NVADYYPEYK                 | Yes               | 631.29                 | 536.3                 | 12.06                       | 82.4                     | 39.3                | 314919                          | ND                        | ND                        | No           |
| VA0D1               | NVADYYPEYK                 | Yes               | 631.29                 | 699.3                 | 12.06                       | 82.4                     | 30.3                | 35635                           | ND                        | ND                        | No           |
| VA0D1               | NVADYYPEYK                 | Yes               | 631.29                 | 977.4                 | 12.06                       | 82.4                     | 30.3                | 34928                           | ND                        | ND                        | No           |
| VAV3                | LQAETELINR                 | Yes               | 593.83                 | 289.2                 | 11.74                       | 77.6                     | 31.6                | 33547                           | ND                        | ND                        | No           |
| VAV3                | LQAETELINR                 | Yes               | 593.83                 | 515.3                 | 11.74                       | 77.6                     | 37.6                | 22596                           | ND                        | ND                        | No           |
| VAV3                | LQAETELINR                 | Yes               | 593.83                 | 874.5                 | 11.74                       | 77.6                     | 37.6                | 10865                           | ND                        | ND                        | No           |
| VAV3                | LQAETELINR                 | Yes               | 593.83                 | 945.5                 | 11.74                       | 77.6                     | 28.6                | 45821                           | ND                        | ND                        | No           |
| VAV3                | NDQNLVQVFINYK              | Yes               | 829.91                 | 358.1                 | 20.55                       | 108.1                    | 48                  | 6568                            | ND                        | ND                        | No           |
| VAV3                | NDQNLVQVFINYK              | Yes               | 829.91                 | 424.2                 | 20.55                       | 108.1                    | 39                  | 9021                            | ND                        | ND                        | No           |
| VAV3                | NDQNLVQVFINYK              | Yes               | 829.91                 | 472.2                 | 20.55                       | 108.1                    | 45                  | 4370                            | ND                        | ND                        | No           |
| VAV3                | NDQNLVQVFINYK              | Yes               | 829.91                 | 783.4                 | 20.55                       | 108.1                    | 45                  | 3233                            | ND                        | ND                        | No           |
| VAV3                | QFQLSIENLNQPVLLFGRPQGDGEIR | No                |                        |                       |                             |                          |                     |                                 |                           |                           |              |
| VAV3                | TPIALATGIRPFPTTEESINDEDIYK | No                |                        |                       |                             |                          |                     |                                 |                           |                           |              |
| VAV3                | VTWDSAQVFDLAQTLR           | Yes               | 617.32                 | 517.3                 | 23.26                       | 80.6                     | 26                  | 35935                           | ND                        | ND                        | No           |
| VAV3                | VTWDSAQVFDLAQTLR           | Yes               | 617.32                 | 588.3                 | 23.26                       | 80.6                     | 29                  | 49353                           | ND                        | ND                        | No           |
| VAV3                | VTWDSAQVFDLAQTLR           | Yes               | 617.32                 | 816.5                 | 23.26                       | 80.6                     | 29                  | 38344                           | ND                        | ND                        | No           |
| VAV3                | VTWDSAQVFDLAQTLR           | Yes               | 617.32                 | 963.5                 | 23.26                       | 80.6                     | 32                  | 16187                           | ND                        | ND                        | No           |
| VEGFA               | QLELNER                    | Yes               | 451.24                 | 418.2                 | 9.23                        | 59.2                     | 22.4                | 25222                           | 6361                      | ND                        | No           |
| VEGFA               | QLELNER                    | Yes               | 451.24                 | 531.3                 | 9.23                        | 59.2                     | 31.4                | 21985                           | ND                        | ND                        | No           |
| VEGFA               | QLELNER                    | Yes               | 451.24                 | 598.3                 | 9.23                        | 59.2                     | 19.4                | ND                              | ND                        | ND                        | No           |

**Table S5.** MRM assay of individual proteins.

| Protein<br>(_HUMAN) | Peptide                         | MS/MS<br>spectrum | Precursor ion<br>(m/z) | Fragment ion<br>(m/z) | Retention time<br>(minutes) | Decustering<br>potential | Collision<br>energy | Area of<br>synthetic<br>peptide | Area in control<br>sample | Area in disease<br>sample | Interference |
|---------------------|---------------------------------|-------------------|------------------------|-----------------------|-----------------------------|--------------------------|---------------------|---------------------------------|---------------------------|---------------------------|--------------|
| VEGFA               | QLELNER                         | Yes               | 451.24                 | 660.3                 | 9.23                        | 59.2                     | 31.4                | 30155                           | ND                        | ND                        | No           |
| VEGFA               | SWSVYVGAR                       | Yes               | 512.76                 | 274.1                 | 14.21                       | 67.1                     | 25.1                | 151808                          | ND                        | ND                        | No           |
| VEGFA               | SWSVYVGAR                       | Yes               | 512.76                 | 565.3                 | 14.21                       | 67.1                     | 34.1                | 35217                           | ND                        | ND                        | No           |
| VEGFA               | SWSVYVGAR                       | Yes               | 512.76                 | 664.4                 | 14.21                       | 67.1                     | 34.1                | 14399                           | ND                        | ND                        | No           |
| VEGFA               | SWSVYVGAR                       | Yes               | 512.76                 | 751.4                 | 14.21                       | 67.1                     | 25.1                | 78236                           | ND                        | ND                        | No           |
| VEGFC               | DLEEQLR                         | Yes               | 451.73                 | 288.2                 | 11.05                       | 59.3                     | 31.4                | 37427                           | ND                        | ND                        | No           |
| VEGFC               | DLEEQLR                         | Yes               | 451.73                 | 416.3                 | 11.05                       | 59.3                     | 31.4                | 31039                           | ND                        | ND                        | No           |
| VEGFC               | DLEEQLR                         | Yes               | 451.73                 | 545.3                 | 11.05                       | 59.3                     | 22.4                | 73407                           | ND                        | ND                        | No           |
| VEGFC               | DLEEQLR                         | Yes               | 451.73                 | 674.3                 | 11.05                       | 59.3                     | 22.4                | 124074                          | ND                        | ND                        | No           |
| VEGFC               | EAPAAAAAFESGLDLSDAEPDAGEATAYASK | Yes               | 999.46                 | 440.2                 | 19.07                       | 129.9                    | 51.5                | ND                              | ND                        | 1736                      | No           |
| VEGFC               | EAPAAAAAFESGLDLSDAEPDAGEATAYASK | Yes               | 999.46                 | 468.2                 | 19.07                       | 129.9                    | 45.5                | 2740                            | ND                        | ND                        | No           |
| VEGFC               | EAPAAAAAFESGLDLSDAEPDAGEATAYASK | Yes               | 999.46                 | 653.3                 | 19.07                       | 129.9                    | 48.5                | 3501                            | ND                        | ND                        | No           |
| VEGFC               | EAPAAAAAFESGLDLSDAEPDAGEATAYASK | Yes               | 999.46                 | 897.4                 | 19.07                       | 129.9                    | 45.5                | 2725                            | ND                        | 2278                      | No           |
| VEGFC               | EQANLNSR                        | Yes               | 466.23                 | 262.2                 | 5.81                        | 61.1                     | 23                  | 8410                            | ND                        | ND                        | No           |
| VEGFC               | EQANLNSR                        | Yes               | 466.23                 | 376.2                 | 5.81                        | 61.1                     | 23                  | 16467                           | ND                        | ND                        | No           |
| VEGFC               | EQANLNSR                        | Yes               | 466.23                 | 603.3                 | 5.81                        | 61.1                     | 23                  | 10949                           | ND                        | ND                        | No           |
| VEGFC               | EQANLNSR                        | Yes               | 466.23                 | 674.4                 | 5.81                        | 61.1                     | 26                  | 15774                           | ND                        | ND                        | No           |
| VEGFC               | FAAAHYNTEILK                    | Yes               | 689.36                 | 260.2                 | 12.61                       | 89.9                     | 38.8                | 53796                           | ND                        | ND                        | No           |
| VEGFC               | FAAAHYNTEILK                    | Yes               | 689.36                 | 373.3                 | 12.61                       | 89.9                     | 38.8                | 13503                           | ND                        | ND                        | No           |
| VEGFC               | FAAAHYNTEILK                    | Yes               | 689.36                 | 498.2                 | 12.61                       | 89.9                     | 41.8                | 15206                           | ND                        | ND                        | No           |
| VEGFC               | FAAAHYNTEILK                    | Yes               | 689.36                 | 880.5                 | 12.61                       | 89.9                     | 35.8                | 9134                            | ND                        | ND                        | No           |
| VEGFC               | NQPLNPGK                        | Yes               | 434.24                 | 301.2                 | 6.36                        | 57                       | 30.6                | 345650                          | ND                        | ND                        | No           |
| VEGFC               | NQPLNPGK                        | Yes               | 434.24                 | 340.2                 | 6.36                        | 57                       | 18.6                | 5015                            | ND                        | ND                        | No           |

**Table S5.** MRM assay of individual proteins.

| Protein<br>(_HUMAN) | Peptide             | MS/MS<br>spectrum | Precursor ion<br>(m/z) | Fragment ion<br>(m/z) | Retention time<br>(minutes) | Decustering<br>potential | Collision<br>energy | Area of<br>synthetic<br>peptide | Area in control<br>sample | Area in disease<br>sample | Interference |
|---------------------|---------------------|-------------------|------------------------|-----------------------|-----------------------------|--------------------------|---------------------|---------------------------------|---------------------------|---------------------------|--------------|
| VEGFC               | NQPLNPGK            | Yes               | 434.24                 | 528.3                 | 6.36                        | 57                       | 24.6                | 23787                           | ND                        | ND                        | No           |
| VEGFC               | NQPLNPGK            | Yes               | 434.24                 | 625.4                 | 6.36                        | 57                       | 21.6                | 504659                          | ND                        | ND                        | No           |
| VEGFD               | AASSLEELLR          | Yes               | 544.8                  | 659.4                 | 18.13                       | 71.3                     | 29.5                | 92110                           | ND                        | ND                        | No           |
| VEGFD               | AASSLEELLR          | Yes               | 544.8                  | 772.5                 | 18.13                       | 71.3                     | 26.5                | 39860                           | ND                        | ND                        | No           |
| VEGFD               | AASSLEELLR          | Yes               | 544.8                  | 859.5                 | 18.13                       | 71.3                     | 26.5                | 32188                           | ND                        | ND                        | No           |
| VEGFD               | AASSLEELLR          | Yes               | 544.8                  | 946.5                 | 18.13                       | 71.3                     | 26.5                | 36504                           | ND                        | ND                        | No           |
| VEGFD               | DLIQHPK             | Yes               | 425.74                 | 381.2                 | 7.61                        | 55.9                     | 27.2                | 245233                          | ND                        | ND                        | No           |
| VEGFD               | DLIQHPK             | Yes               | 425.74                 | 509.3                 | 7.61                        | 55.9                     | 21.2                | 264184                          | ND                        | ND                        | No           |
| VEGFD               | DLIQHPK             | Yes               | 425.74                 | 607.3                 | 7.61                        | 55.9                     | 21.2                | 66402                           | ND                        | ND                        | No           |
| VEGFD               | DLIQHPK             | Yes               | 425.74                 | 622.4                 | 7.61                        | 55.9                     | 24.2                | 525032                          | ND                        | ND                        | No           |
| VEGFD               | FAATFYDIETLK        | Yes               | 473.58                 | 361.2                 | 19.80                       | 62.1                     | 30.7                | 9738                            | ND                        | ND                        | No           |
| VEGFD               | FAATFYDIETLK        | Yes               | 473.58                 | 538.3                 | 19.80                       | 62.1                     | 18.7                | 15255                           | ND                        | ND                        | No           |
| VEGFD               | FAATFYDIETLK        | Yes               | 473.58                 | 603.4                 | 19.80                       | 62.1                     | 21.7                | 11445                           | ND                        | ND                        | No           |
| VEGFD               | FAATFYDIETLK        | Yes               | 473.58                 | 718.4                 | 19.80                       | 62.1                     | 21.7                | 15280                           | ND                        | ND                        | No           |
| VEGFD               | QLFEISVPLTSVPELVPVK | Yes               | 1048.11                | 343.2                 | 24.51                       | 136.2                    | 45.6                | 22469                           | ND                        | ND                        | No           |
| VEGFD               | QLFEISVPLTSVPELVPVK | Yes               | 1048.11                | 518.3                 | 24.51                       | 136.2                    | 48.6                | 13070                           | ND                        | ND                        | No           |
| VEGFD               | QLFEISVPLTSVPELVPVK | Yes               | 1048.11                | 631.3                 | 24.51                       | 136.2                    | 48.6                | 9026                            | ND                        | ND                        | No           |
| VEGFD               | QLFEISVPLTSVPELVPVK | Yes               | 1048.11                | 781.5                 | 24.51                       | 136.2                    | 51.6                | 13705                           | ND                        | ND                        | No           |
| VEGFD               | VIDEEWQR            | No                |                        |                       |                             |                          |                     |                                 |                           |                           |              |
| VGFR1               | AFPSPEVVWLK         | Yes               | 636.85                 | 260.2                 | 20.72                       | 83.2                     | 39.5                | 44444                           | ND                        | ND                        | No           |
| VGFR1               | AFPSPEVVWLK         | Yes               | 636.85                 | 545.3                 | 20.72                       | 83.2                     | 39.5                | 57610                           | ND                        | ND                        | No           |
| VGFR1               | AFPSPEVVWLK         | Yes               | 636.85                 | 870.5                 | 20.72                       | 83.2                     | 30.5                | 254335                          | ND                        | ND                        | No           |
| VGFR1               | AFPSPEVVWLK         | Yes               | 636.85                 | 957.5                 | 20.72                       | 83.2                     | 33.5                | 47315                           | ND                        | ND                        | No           |



**Table S5.** MRM assay of individual proteins.

| Protein<br>(_HUMAN) | Peptide                 | MS/MS<br>spectrum | Precursor ion<br>(m/z) | Fragment ion<br>(m/z) | Retention time<br>(minutes) | Decustering<br>potential | Collision<br>energy | Area of<br>synthetic<br>peptide | Area in control<br>sample | Area in disease<br>sample | Interference |
|---------------------|-------------------------|-------------------|------------------------|-----------------------|-----------------------------|--------------------------|---------------------|---------------------------------|---------------------------|---------------------------|--------------|
| VGFR1               | AVSSFPDPALYPLGSR        | Yes               | 838.94                 | 529.3                 | 18.75                       | 109.2                    | 39.4                | 155980                          | ND                        | ND                        | No           |
| VGFR1               | AVSSFPDPALYPLGSR        | Yes               | 838.94                 | 692.4                 | 18.75                       | 109.2                    | 45.4                | 81127                           | ND                        | ND                        | No           |
| VGFR1               | AVSSFPDPALYPLGSR        | Yes               | 838.94                 | 805.5                 | 18.75                       | 109.2                    | 48.4                | 34675                           | ND                        | ND                        | No           |
| VGFR1               | AVSSFPDPALYPLGSR        | Yes               | 838.94                 | 973.5                 | 18.75                       | 109.2                    | 45.4                | 204507                          | ND                        | ND                        | No           |
| VGFR1               | GSVESSAYLTVQGTSDK       | Yes               | 864.92                 | 507.2                 | 12.30                       | 112.6                    | 37.6                | 4938                            | ND                        | ND                        | No           |
| VGFR1               | GSVESSAYLTVQGTSDK       | Yes               | 864.92                 | 635.3                 | 12.30                       | 112.6                    | 40.6                | 3667                            | ND                        | ND                        | No           |
| VGFR1               | GSVESSAYLTVQGTSDK       | Yes               | 864.92                 | 835.4                 | 12.30                       | 112.6                    | 40.6                | 3465                            | ND                        | ND                        | No           |
| VGFR1               | GSVESSAYLTVQGTSDK       | Yes               | 864.92                 | 948.5                 | 12.30                       | 112.6                    | 40.6                | 2286                            | ND                        | ND                        | No           |
| VGFR1               | LGDLLQANVQQDGK          | Yes               | 749.9                  | 286.1                 | 13.67                       | 97.7                     | 44.5                | 54523                           | 26406                     | 20504                     | No           |
| VGFR1               | LGDLLQANVQQDGK          | Yes               | 749.9                  | 788.4                 | 13.67                       | 97.7                     | 35.5                | 4668                            | ND                        | ND                        | No           |
| VGFR1               | LGDLLQANVQQDGK          | Yes               | 749.9                  | 859.4                 | 13.67                       | 97.7                     | 35.5                | 6757                            | ND                        | ND                        | No           |
| VGFR1               | LGDLLQANVQQDGK          | Yes               | 749.9                  | 987.5                 | 13.67                       | 97.7                     | 35.5                | 6732                            | ND                        | ND                        | No           |
| VGFR1               | NILSENNVVK              | No                |                        |                       |                             |                          |                     |                                 |                           |                           |              |
| VTNC                | ATWLSLFSSEESNLGANNYDDYR | No                |                        |                       |                             |                          |                     |                                 |                           |                           |              |
| VTNC                | AVRPGYPK                | Yes               | 296.51                 | 327.2                 | 6.32                        | 39.2                     | 15.7                | 6367                            | 92689                     | 72802                     | No           |
| VTNC                | AVRPGYPK                | Yes               | 296.51                 | 481.3                 | 6.32                        | 39.2                     | 15.7                | 27437                           | 255258                    | 227635                    | No           |
| VTNC                | AVRPGYPK                | Yes               | 296.51                 | 561.3                 | 6.32                        | 39.2                     | 15.7                | 18980                           | 200622                    | 161279                    | No           |
| VTNC                | AVRPGYPK                | Yes               | 296.51                 | 644.4                 | 6.32                        | 39.2                     | 21.7                | ND                              | ND                        | ND                        | No           |
| VTNC                | DSWEDIFELLFWGR          | Yes               | 906.93                 | 418.2                 | 25.02                       | 118                      | 42.4                | ND                              | ND                        | ND                        | No           |
| VTNC                | DSWEDIFELLFWGR          | Yes               | 906.93                 | 565.3                 | 25.02                       | 118                      | 39.4                | ND                              | ND                        | ND                        | No           |
| VTNC                | DSWEDIFELLFWGR          | Yes               | 906.93                 | 633.2                 | 25.02                       | 118                      | 39.4                | ND                              | ND                        | ND                        | No           |
| VTNC                | DSWEDIFELLFWGR          | Yes               | 906.93                 | 746.3                 | 25.02                       | 118                      | 42.4                | ND                              | ND                        | ND                        | No           |
| VTNC                | DVWGIEGPIDAAFTR         | Yes               | 823.91                 | 458.2                 | 22.99                       | 107.3                    | 41.8                | 135315                          | 1427037                   | 1390869                   | No           |

**Table S5.** MRM assay of individual proteins.

| Protein<br>(_HUMAN) | Peptide             | MS/MS<br>spectrum | Precursor ion<br>(m/z) | Fragment ion<br>(m/z) | Retention time<br>(minutes) | Declustering<br>potential | Collision<br>energy | Area of<br>synthetic<br>peptide | Area in control<br>sample | Area in disease<br>sample | Interference |
|---------------------|---------------------|-------------------|------------------------|-----------------------|-----------------------------|---------------------------|---------------------|---------------------------------|---------------------------|---------------------------|--------------|
| VTNC                | DVWGIEGPIDAAFTR     | Yes               | 823.91                 | 565.3                 | 22.99                       | 107.3                     | 47.8                | 65041                           | 822465                    | 782320                    | No           |
| VTNC                | DVWGIEGPIDAAFTR     | Yes               | 823.91                 | 890.5                 | 22.99                       | 107.3                     | 38.8                | 42981                           | 466249                    | 466003                    | No           |
| VTNC                | DVWGIEGPIDAAFTR     | Yes               | 823.91                 | 947.5                 | 22.99                       | 107.3                     | 41.8                | 79699                           | 841124                    | 863797                    | No           |
| VTNC                | FEDGVLDPDYPR        | Yes               | 711.83                 | 277.1                 | 14.87                       | 92.8                      | 36.8                | 54677                           | 46289                     | 42226                     | No           |
| VTNC                | FEDGVLDPDYPR        | Yes               | 711.83                 | 647.3                 | 14.87                       | 92.8                      | 39.8                | 101207                          | 113099                    | 93204                     | No           |
| VTNC                | FEDGVLDPDYPR        | Yes               | 711.83                 | 762.3                 | 14.87                       | 92.8                      | 33.8                | 29624                           | 26645                     | 22977                     | No           |
| VTNC                | FEDGVLDPDYPR        | Yes               | 711.83                 | 875.4                 | 14.87                       | 92.8                      | 33.8                | 40350                           | 44668                     | 45099                     | No           |
| VWC2                | AGDLQVRPR           | No                |                        |                       |                             |                           |                     |                                 |                           |                           |              |
| VWC2                | QAWVSQGGGAK         | Yes               | 544.78                 | 389.2                 | 8.18                        | 71.3                      | 35.5                | 25619                           | ND                        | ND                        | No           |
| VWC2                | QAWVSQGGGAK         | Yes               | 544.78                 | 604.3                 | 8.18                        | 71.3                      | 26.5                | 73085                           | ND                        | ND                        | No           |
| VWC2                | QAWVSQGGGAK         | Yes               | 544.78                 | 703.4                 | 8.18                        | 71.3                      | 29.5                | 26025                           | ND                        | ND                        | No           |
| VWC2                | QAWVSQGGGAK         | Yes               | 544.78                 | 889.5                 | 8.18                        | 71.3                      | 23.5                | 14476                           | ND                        | ND                        | No           |
| VWC2                | VNELGRPAR           | Yes               | 506.29                 | 456.2                 | 6.51                        | 66.3                      | 33.8                | 3964                            | 2266                      | ND                        | No           |
| VWC2                | VNELGRPAR           | Yes               | 506.29                 | 766.4                 | 6.51                        | 66.3                      | 27.8                | 3295                            | 1937                      | ND                        | No           |
| VWC2                | VNELGRPAR           | Yes               | 506.29                 | 837.5                 | 6.51                        | 66.3                      | 27.8                | 3459                            | 2174                      | ND                        | No           |
| WNT3A               | ENRPDAR             | No                |                        |                       |                             |                           |                     |                                 |                           |                           |              |
| WNT3A               | ESAFVHAIASAGVAFAVTR | No                |                        |                       |                             |                           |                     |                                 |                           |                           |              |
| WNT3A               | GWVETLRPR           | No                |                        |                       |                             |                           |                     |                                 |                           |                           |              |
| WNT3A               | HQGSPGK             | Yes               | 355.68                 | 410.2                 | 4.70                        | 46.9                      | 21.2                | 2625                            | ND                        | ND                        | No           |
| WNT3A               | HQGSPGK             | Yes               | 355.68                 | 445.2                 | 4.70                        | 46.9                      | 21.2                | 2465                            | ND                        | ND                        | No           |
| WNT3A               | HQGSPGK             | Yes               | 355.68                 | 564.3                 | 4.70                        | 46.9                      | 15.2                | 761                             | ND                        | ND                        | No           |
| WNT3A               | HQGSPGK             | Yes               | 355.68                 | 573.3                 | 4.70                        | 46.9                      | 18.2                | 2147                            | ND                        | ND                        | No           |
| WNT3A               | YTYFK               | No                |                        |                       |                             |                           |                     |                                 |                           |                           |              |

**Table S5.** MRM assay of individual proteins.

| Protein<br>(_HUMAN) | Peptide                           | MS/MS<br>spectrum | Precursor ion<br>(m/z) | Fragment ion<br>(m/z) | Retention time<br>(minutes) | Declustering<br>potential | Collision<br>energy | Area of<br>synthetic<br>peptide | Area in control<br>sample | Area in disease<br>sample | Interference                           |
|---------------------|-----------------------------------|-------------------|------------------------|-----------------------|-----------------------------|---------------------------|---------------------|---------------------------------|---------------------------|---------------------------|----------------------------------------|
| WT1                 | GVAAGSSSSVK                       | Yes               | 475.25                 | 594.3                 | 5.61                        | 62.3                      | 23.4                | 25524                           | ND                        | ND                        | No                                     |
| WT1                 | GVAAGSSSSVK                       | Yes               | 475.25                 | 651.3                 | 5.61                        | 62.3                      | 23.4                | 150008                          | ND                        | ND                        | No                                     |
| WT1                 | GVAAGSSSSVK                       | Yes               | 475.25                 | 722.4                 | 5.61                        | 62.3                      | 23.4                | 82831                           | ND                        | ND                        | No                                     |
| WT1                 | GVAAGSSSSVK                       | Yes               | 475.25                 | 793.4                 | 5.61                        | 62.3                      | 23.4                | 146726                          | ND                        | ND                        | No                                     |
| WT1                 | IHTHGVER                          | Yes               | 483.77                 | 251.2                 | 7.42                        | 63.4                      | 26.8                | 29716                           | ND                        | ND                        | No                                     |
| WT1                 | IHTHGVER                          | Yes               | 483.77                 | 352.2                 | 7.42                        | 63.4                      | 29.8                | 3380                            | ND                        | ND                        | No                                     |
| WT1                 | IHTHGVER                          | Yes               | 483.77                 | 615.3                 | 7.42                        | 63.4                      | 29.8                | 10203                           | ND                        | ND                        | No                                     |
| WT1                 | IHTHGVER                          | Yes               | 483.77                 | 716.4                 | 7.42                        | 63.4                      | 26.8                | 16313                           | ND                        | ND                        | No                                     |
| WT1                 | NQGYSTVTFDGTSPSYGHTPSHHAAQFPNHSFK | No                |                        |                       |                             |                           |                     |                                 |                           |                           |                                        |
| WT1                 | SDELVR                            | Yes               | 359.69                 | 274.2                 | 7.34                        | 47.4                      | 27.3                | 24409                           | 16999                     | 26861                     | No                                     |
| WT1                 | SDELVR                            | Yes               | 359.69                 | 387.3                 | 7.34                        | 47.4                      | 18.3                | 25914                           | 36660                     | 47230                     | No                                     |
| WT1                 | SDELVR                            | Yes               | 359.69                 | 516.3                 | 7.34                        | 47.4                      | 15.3                | 48541                           | 11164                     | 11414                     | Yes (Based on<br>Transition<br>Ratios) |
| WT1                 | SDELVR                            | Yes               | 359.69                 | 631.3                 | 7.34                        | 47.4                      | 15.3                | 6572                            | ND                        | ND                        | No                                     |
| WT1                 | YGPFGPPPSQASSGQAR                 | Yes               | 600.96                 | 518.3                 | 12.52                       | 78.5                      | 28.2                | 32210                           | ND                        | ND                        | No                                     |
| WT1                 | YGPFGPPPSQASSGQAR                 | Yes               | 600.96                 | 522.2                 | 12.52                       | 78.5                      | 25.2                | 38072                           | ND                        | ND                        | No                                     |
| WT1                 | YGPFGPPPSQASSGQAR                 | Yes               | 600.96                 | 676.3                 | 12.52                       | 78.5                      | 28.2                | 34811                           | ND                        | ND                        | No                                     |
| WT1                 | YGPFGPPPSQASSGQAR                 | Yes               | 600.96                 | 716.3                 | 12.52                       | 78.5                      | 37.2                | 12647                           | ND                        | ND                        | No                                     |
| ZA2G                | DIVEYYNDSNGSHVLQGR                | No                |                        |                       |                             |                           |                     |                                 |                           |                           |                                        |
| ZA2G                | DYIEFNK                           | No                |                        |                       |                             |                           |                     |                                 |                           |                           |                                        |
| ZA2G                | EIPAWVPFDPAAQITK                  | Yes               | 891.98                 | 560.3                 | 22.39                       | 116.1                     | 50.7                | 16541                           | 32548                     | 38460                     | No                                     |
| ZA2G                | EIPAWVPFDPAAQITK                  | Yes               | 891.98                 | 597.3                 | 22.39                       | 116.1                     | 38.7                | 65109                           | 109189                    | 123785                    | No                                     |
| ZA2G                | EIPAWVPFDPAAQITK                  | Yes               | 891.98                 | 696.4                 | 22.39                       | 116.1                     | 38.7                | 135200                          | 213709                    | 229458                    | No                                     |

| <b>Protein<br/>(_HUMAN)</b> | <b>Peptide</b>                 | <b>MS/MS<br/>spectrum</b> | <b>Precursor ion<br/>(m/z)</b> | <b>Fragment ion<br/>(m/z)</b> | <b>Retention time<br/>(minutes)</b> | <b>Declustering<br/>potential</b> | <b>Collision<br/>energy</b> | <b>Area of<br/>synthetic<br/>peptide</b> | <b>Area in control<br/>sample</b> | <b>Area in disease<br/>sample</b> | <b>Interference</b>                    |
|-----------------------------|--------------------------------|---------------------------|--------------------------------|-------------------------------|-------------------------------------|-----------------------------------|-----------------------------|------------------------------------------|-----------------------------------|-----------------------------------|----------------------------------------|
| ZA2G                        | EIPAWVPFDPAAQITK               | Yes                       | 891.98                         | 728.4                         | 22.39                               | 116.1                             | 50.7                        | 121509                                   | 231479                            | 281981                            | No                                     |
| ZA2G                        | WEAEPVYVQR                     | Yes                       | 638.82                         | 316.1                         | 12.78                               | 83.4                              | 27.6                        | 16515                                    | 209041                            | 192944                            | No                                     |
| ZA2G                        | WEAEPVYVQR                     | Yes                       | 638.82                         | 761.4                         | 12.78                               | 83.4                              | 30.6                        | 10249                                    | 179191                            | 141908                            | No                                     |
| ZA2G                        | WEAEPVYVQR                     | Yes                       | 638.82                         | 890.5                         | 12.78                               | 83.4                              | 30.6                        | 3846                                     | 12584                             | 9269                              | Yes (Based on<br>Transition<br>Ratios) |
| ZA2G                        | WEAEPVYVQR                     | Yes                       | 638.82                         | 961.5                         | 12.78                               | 83.4                              | 39.6                        | 5243                                     | 55122                             | 45265                             | No                                     |
| ZA2G                        | YSLTYIYTGLSK                   | No                        |                                |                               |                                     |                                   |                             |                                          |                                   |                                   |                                        |
| ZG16B                       | LDGQISSAYPSQEGQVLVGIYGQYQLLGIK | No                        |                                |                               |                                     |                                   |                             |                                          |                                   |                                   |                                        |
| ZG16B                       | LGALGGNTQEVTLQPGEYITK          | Yes                       | 1095.08                        | 524.3                         | 16.75                               | 142.3                             | 50.7                        | 3979                                     | ND                                | ND                                | No                                     |
| ZG16B                       | LGALGGNTQEVTLQPGEYITK          | Yes                       | 1095.08                        | 807.4                         | 16.75                               | 142.3                             | 56.7                        | 29400                                    | ND                                | ND                                | No                                     |
| ZG16B                       | LGALGGNTQEVTLQPGEYITK          | Yes                       | 1095.08                        | 935.5                         | 16.75                               | 142.3                             | 50.7                        | 3297                                     | ND                                | ND                                | No                                     |
| ZG16B                       | LGALGGNTQEVTLQPGEYITK          | Yes                       | 1095.08                        | 941.5                         | 16.75                               | 142.3                             | 56.7                        | 3176                                     | ND                                | ND                                | No                                     |
| ZG16B                       | VSVGLLLVK                      | No                        |                                |                               |                                     |                                   |                             |                                          |                                   |                                   |                                        |
| ZG16B                       | YFSTTEDYDHEITGLR               | Yes                       | 649.63                         | 311.1                         | 15.07                               | 84.8                              | 27.7                        | 122109                                   | ND                                | ND                                | No                                     |
| ZG16B                       | YFSTTEDYDHEITGLR               | Yes                       | 649.63                         | 559.4                         | 15.07                               | 84.8                              | 39.7                        | 36330                                    | ND                                | ND                                | No                                     |
| ZG16B                       | YFSTTEDYDHEITGLR               | Yes                       | 649.63                         | 825.5                         | 15.07                               | 84.8                              | 36.7                        | 37697                                    | ND                                | ND                                | No                                     |
| ZG16B                       | YFSTTEDYDHEITGLR               | Yes                       | 649.63                         | 940.5                         | 15.07                               | 84.8                              | 39.7                        | 13783                                    | ND                                | ND                                | No                                     |
| ZG16B                       | YFYFGK                         | No                        |                                |                               |                                     |                                   |                             |                                          |                                   |                                   |                                        |

**Note:** See (17) for definition of terminologies.

- Protein: UniProt protein name
- Peptide: Peptide sequence. If no peptide was sequenced for the protein, it is labeled as "No peptide".
- MS/MS spectrum: Whether MS/MS spectrum was successfully acquired using MRM-triggered MS/MS spectrum: Yes or No. If No, MRM assay was not developed for the peptide.

- Precursor ion (m/z): The mass-to-charge ratio of the precursor ion.
- Fragment ion (m/z): The mass-to-charge ratio of the fragment (product) ion.
- Retention time (minutes): Peptide retention time in minutes.
- Declustering potential: Deculstering potential for the precursor ion.
- Collision Energy: Optimized collision energy of the fragment ion.
- Area of synthetic peptide: Peak area obtained from a mix of synthetic peptides.
- Area in control sample: Peak area obtained from a pooled control sample.
- Area in disease sample: Peak area obtained from a pooled lung cancer sample.
- Interference: Whether interference was observed on the transition in the two biological samples.
